# Supplementary material for: The single-cell chromatin accessibility landscape in mouse perinatal testis development
Source: eLife journal article supplement (doi:10.7554/elife.75624), 2023-04-25
Supplement: supp [file elife-75624-supp-v1.zip]

Archive with 18 entries (18 files):
- elife_poa_e75624_Supplementary_file_1.xlsx
- elife_poa_e75624_Supplementary_file_2.bed
- elife_poa_e75624_Supplementary_file_3.xlsx
- elife_poa_e75624_Supplementary_file_4.xlsx
- elife_poa_e75624_Supplementary_file_5.xlsx
- elife_poa_e75624_Supplementary_file_6.xlsx
- elife_poa_e75624_Figure_1_figure_supplement_1.pdf
- elife_poa_e75624_Figure_1_figure_supplement_2.pdf
- elife_poa_e75624_Figure_2_figure_supplement_1.pdf
- elife_poa_e75624_Figure_3_figure_supplement_1.pdf
- elife_poa_e75624_Figure_3_figure_supplement_2.pdf
- elife_poa_e75624_Figure_4_figure_supplement_1.pdf
- elife_poa_e75624_Figure_4_figure_supplement_2.pdf
- elife_poa_e75624_Figure_4_figure_supplement_3.pdf
- elife_poa_e75624_Figure_4_figure_supplement_4.pdf
- elife_poa_e75624_Figure_5_figure_supplement_1.pdf
- elife_poa_e75624_Figure_5_figure_supplement_2.pdf
- elife_poa_e75624_Figure_5_figure_supplement_3.pdf
