# Supplementary material for: The single-cell chromatin accessibility landscape in mouse perinatal testis development
Source: eLife journal article supplement (doi:10.7554/elife.75624), 2023-04-25
Supplement: supp [file elife-75624-supp-v1.zip › elife_poa_e75624_Supplementary_file_1.xlsx]

## Sheet: Sheet1
Cyp17a1
Cyp11a1
Ren1
Lyz2
Apoe
Hsd3b1
Pf4
C1qa
S100a8
C1qc
S100a9
C1qb
Fcer1g
Stfa1
BC100530
Gm5483
Camp
Ngp
Lcn2
Tyrobp
1500015O10Rik
Stfa2l1
Stfa3
Star
Ltf
Fdx1
Ctss
Stfa2
Rgs5
Ccl4
Pglyrp1
Insl3
Cldn5
Cd52
Stra8
Tuba3a
Ly6c2
Adh1
Wfdc21
Ccl2
Ms4a7
Dazl
Cd74
Trem2
Alas1
Hmox1
Lgals3
Fcrls
Acta2
Arhgdib
Pou5f1
Hbb-bs
Ggh
Ctla2a
Ccl3
Cst8
Tuba3b
Fcnb
Hao2
Ifitm6
Chil3
Hba-a1
Ndufa4l2
Uchl1
Gpihbp1
Ccl17
Tagln
2010005H15Rik
Npy
Hp
Hba-a2
Fdps
Rgs1
Il1b
Mt2
Tm4sf1
Olfm4
Nkg7
C4b
Cd68
Coro1a
Aif1
Clec3b
Cyp21a1
Mael
Hbb-bt
Egfl7
Ly6d
Retnlg
Rac2
Cd93
AW112010
Apold1
Ms4a6c
Fabp3
Rpl39l
Cx3cr1
Taf7l
Mmp8
Cxcl2
Tmsb4x
H2-Aa
Cebpe
H2-Ab1
Kdr
Esam
Ccl7
Kcnk3
Ly86
Srgn
Trbc2
Xcl1
Nts
H2-D1
Flt1
Fkbp6
Mgp
Klrd1
Cd3g
Hist1h2ap
Alox5ap
Ube2c
Mrc1
Laptm5
Fcgr3
Csf1r
Slc25a31
Cox4i2
Cxcl10
8430408G22Rik
Tex19.1
F630028O10Rik
Higd1b
Egr4
Ccl5
H2-Eb1
F13a1
Sct
Ctsc
Prtn3
Ptgds
Ccl12
Sohlh1
Ms4a6d
Elane
Trbc1
Vsnl1
Ighm
Emcn
Plac8
S100a16
Pnmt
Cdkn1c
Gja4
Gm16222
Klrk1
Cbr2
Gmfg
Crip2
Dlk1
Lhcgr
Aard
Cd3d
Ecscr
Ifi27l2a
Slpi
Marco
Crabp1
Gtsf1
Meg3
Igkc
Cdkn2a
Sycp1
Defb19
Calca
Ccr2
Pecam1
Eln
S100a6
Cybb
Gja5
Serpine1
Ms4a3
Cd7
Sox17
Dcn
C3ar1
Cenpf
Rbmxl2
Icam2
Trdc
Crip1
Selenop
Myl9
Gng11
Prkar2b
Acsbg1
Vwf
Tuba4a
Cav1
Igfbp7
Ptprcap
Mageb4
Scarb1
Pclaf
Ctsw
Smc1b
Ms4a6b
AC160336.1
Clec12a
Cd79a
Gm43409
Klra5
Hist1h2bc
Clps
Tnnt2
Clec4n
Tppp3
Cd300c2
Hmgb2
Amh
Mzb1
Lst1
Cdc20
Fads2
Trem3
Pld4
Ms4a4b
Cenpa
Afp
Ly6c1
Plvap
Hspe1
Actg2
Usp26
P2rx2
Ctsd
Aldh3a1
Apln
Ifitm3
Tspan13
Col4a4
Ptpn18
Gpha2
Igfbp5
Dusp2
Gm13889
Mt1
Mndal
Aebp1
Ms4a1
Pcdh17
H19
Hist1h2ae
Gimap6
Ly6g
Lgmn
Spi1
Cd53
Top2a
Sycp3
Cyp11b1
Rhox5
Isg15
Wfdc17
Ftl1
Car3
Upk3b
Klf2
Ifi203
Kctd14
Hspd1
Lefty2
Arl6ip1
Tex15
Aldh1a1
Igfbp2
Mpo
Lcp1
Stab1
Clu
Tex101
Ccnb1
Eng
Plk2
Aplnr
Cst9
Sostdc1
Clec4a2
Gm10457
Gm5416
Akr1cl
Ccl24
Anxa1
Cd79b
Lum
Ccnd1
Tcrg-C1
Basp1
Cxcl1
Igfbp3
Myct1
Msmo1
Dhcr7
Fcgr1
Rmst
Trem1
Cox7b2
Cks2
Ncr1
Slco2a1
Igfbp6
Smagp
Hpgds
Cd69
Gm13075
Tcrg-C4
Hmgcs2
Gpr34
BC048679
Gzmb
Ddx4
Cdkn1a
Lmo2
1700018B24Rik
Gadd45g
Napsa
Cldn11
Nov
Vpreb3
Prss57
Trap1a
Ms4a4c
Rgs4
Hist1h1b
Stk31
Birc5
Serpina3g
Tex12
Fbxl22
Cxcl12
Cst7
Ifitm1
Mcemp1
Ccr9
Osm
C1qtnf3
Mest
Cd14
Tubb4b
Klrc1
Adgrf5
Mov10l1
Col3a1
Gm42418
Prc1
Rrad
Cryba4
Ltc4s
Cnmd
Folr2
Cst12
Cd160
Nppc
Hmgcs1
Igsf6
Hspa1a
Ptn
Dab2
Cd48
Ptprb
Sall4
Cxcl13
Myh11
Tnni3
Aqp1
Mustn1
Fam129a
Vcam1
1700018G05Rik
Rasip1
Edn1
Ncf4
Ctsg
Zbtb16
Ccnb2
Col1a1
Htra3
Ace2
Tubb6
Rhox8
Apoc1
Gas1
Mfap5
S100a4
Wfdc10
Pcgf5
Gpnmb
Tcl1
C130074G19Rik
B2m
Ephx1
Cxcr6
Atf3
Spocd1
Rergl
Shisa8
Col4a3
Crybb1
Hcar2
Inha
Il2rb
Esm1
Nxf2
AU021092
Cnn1
Plxnd1
Crlf1
Slfn2
Ptp4a3
Cthrc1
Bst2
Ctsb
Sparcl1
Cyp51
Coprs
Dpt
Ptcra
Nusap1
8030411F24Rik
Sox3
Dmrtb1
Fabp7
Cebpb
Hspb1
Trim71
Sez6l2
Stmn2
Tmem100
Agtr2
Icam1
Iigp1
C5ar1
Evi2a
Serpina3a
Stmn1
Aqp2
Tpm2
Ltb4r1
Gramd1b
Cdk1
Map7d2
Cenpe
Cdh5
Areg
Cyct
Pimreg
Cxcl9
Mxd3
Cd84
Aspn
Tlr2
Ctsl
Chchd10
Clec14a
Col4a1
Gimap4
Ncf1
Fgl2
Cd300a
Gstm1
Socs3
Lrg1
Gm28578
Igf1
Cnn2
Epas1
Cebpd
Slc25a48
Afap1l1
Cyp26b1
Lgals7
H2-K1
Cited1
Map3k7cl
Cidea
Bex2
Itm2a
Rcc2
Cd34
Tac1
Adgre1
Ccl9
Mfng
Cdca3
Rrm2
Kcnj8
Kcne3
Tesc
H2afx
Adrb2
Col1a2
Fli1
Inhba
Cela1
Sat1
Lockd
Cyba
Clec4e
Tnfaip8l2
Pax8
Cd3e
Ccl6
Cdca8
Actc1
Foxf1
Mfap4
Mvd
Ptprc
H2afz
Tcim
Mki67
Clec4a3
Fhl2
Asz1
Utf1
Hmgcr
Sept4
Cd163l1
Ceacam10
Idi1
Gzma
Slc11a1
Rsad2
Ifi209
Gstm6
Pou3f1
Slc7a11
BC117090
Gm28382
Ifit1
Csrp1
Sox7
Cd36
Mgarp
Dnd1
Ccrl2
Ltb
Plet1
Nupr1
Cecr2
Actb
Rbp7
Cd83
Pbk
Ccna2
D10Wsu102e
Gata3
Cd24a
Ccr1
Prex2
Psmb8
Gm2694
Pdlim3
Itga1
Hmmr
G0s2
Fcgr4
Tnf
Ifng
Tgfb2
Tmem114
Phlda1
Klrb1c
Epcam
Hells
Gria2
Spc25
Gfra1
Cd86
Bcl2a1b
Tpx2
Ptpn6
Hexb
Piwil2
Gsta2
Smc4
Ebf1
Hbegf
Cotl1
Rgcc
Klrb1b
Mgat4c
Mrap
Kazald1
Scml2
Col4a2
Etd
Trh
Tnfrsf12a
Il18
Klre1
S100a3
Cd8b1
Phlda2
Mrgpra2a
Fabp5
Tie1
C1qtnf9
Pcolce
Itgb2l
Gstm2
Fth1
Sgk1
Ifi204
Gm45184
Madcam1
Slfn1
Clec5a
Cavin2
Eddm3b
Gm12216
Ret
Bgn
Adamts5
Dok4
Fpr1
Cd4
Iglc2
Entpd2
Sdc4
Nrk
Tinagl1
Smoc2
mt-Co1
Col15a1
Il4
Samd3
Penk
Rhox13
Zfp36
Plek
Fpr2
Ehd4
Stc1
Id2
Tac2
Defb36
4933402E13Rik
Mecom
Sfrp2
Mmrn2
Hist1h1e
Tuba1a
Iglc1
Mylk
Rgs16
Hhex
Spp1
Lsp1
Pla2g1b
Upp1
Pcp4l1
Sftpc
Bpifb4
Tk1
Ankrd22
Alyref
Kdm1b
Agt
Serpine2
Fndc5
Dll4
Rasd1
Scx
BC035044
Rec114
Irf8
Knstrn
Fbln1
Cd28
Ccl11
C3
Pou2af1
S100a10
H2-DMb1
Cavin3
Cd2
Sncg
Gimap5
Slc45a3
Snhg11
Il7r
Gm32913
Thy1
1110008P14Rik
Podxl
Hist1h1c
Plk1
Crhr1
Cyr61
Tmem171
Emp1
Id1
Gimap1
Elk3
Nsdhl
Cxcl14
Plcg2
Cd180
Cyp4f18
Pdgfa
Racgap1
Nefm
Osr2
Lhx1
Aldh1b1
Lmo1
Cd37
Pank1
Sfrp1
Folr1
Olfr655
Nme8
Gatm
Cbln2
Tmem184a
Prlr
Acat2
Ccr7
Trf
Cycs
Tcf21
Id4
Fxyd5
Kif23
Msr1
Mpeg1
Spc24
Rnf17
Car2
Lcn3
Tsc22d3
Dusp1
Pmvk
Cdkn2c
Serpinb1a
Ptpn7
Fthl17c
Mt3
Spry1
Lmod1
Clec1a
Hsd17b1
Mfap2
Iqgap2
Gsta4
Alad
Tpm1
Susd3
Mob4
Plpp3
Trp53i11
Fbln5
Postn
Pkib
Serpina5
Olfml3
Il6
Stmn4
Cpa1
Qpct
Rgs2
Xlr5c
Orm1
Itgb7
Klrc2
Foxr1
Hlx
Dnajb1
Tmem88
Cd33
Amhr2
Tubb3
AC167229.1
Gngt2
Mis18bp1
Csrp2
Oxtr
Esx1
Neat1
Cald1
Dmrt1
Aurkb
Fads1
Prdx1
Mapt
Sin3b
Pde10a
Lrrc25
Id3
Unc5b
Hmgb3
Gm12589
Cd82
Ckb
Selplg
Nefh
Asprv1
Ccdc113
Pdyn
1700020L24Rik
Ube2s
Ldlr
Tbx1
Ces1d
Aurka
Idh1
Clec12b
Ccl8
Il1rl1
Gm16287
Rasgrp3
Emp3
Rnase6
Cdkn3
Gpx3
Tnfaip3
Esco2
Syce3
AU015791
Adgre4
Scd1
Dkk2
Rab33a
Fcrla
Insig1
Mia
Olfr558
Esrp1
Cyyr1
Prss50
Ptgs2
Zbp1
4930558K02Rik
Apoa1
Hcst
Pramef12
Ushbp1
Lyl1
Slamf6
Pdgfrb
Copz2
Ebp
Ldhb
Ogn
Gpr183
Lig1
Tyms
Cyth4
Ly6k
Hspg2
Tuba1c
Syce1
Fam183b
Ppp1r14a
Cd177
Igfbp4
Akr1b3
Gem
Atp8b4
Cbln1
Adgrl4
Smc2
Pcsk1
Nr4a2
Bex4
Asb2
Rnase12
Kif22
Tm7sf2
Sfn
Nkx6-3
Dhrs7c
Nfatc2
Ccnd2
Gm47416
P2ry12
Bdnf
Hes1
Sdf2l1
Mmp9
Nrn1
Fbxo32
Lilr4b
Ier3
Tuba1b
Gm6880
Fdxr
Cited2
Krtcap3
Gdf15
Aspm
Sohlh2
Aldoc
Nnat
Gm45716
Thbd
Shh
Meox1
Lyve1
8030474K03Rik
Barhl2
Foxq1
Tslrn1
Abcb1a
Wfdc1
Lhx9
Etv2
Junb
Tbata
Dnajc15
Ckap2l
Neurog3
Ngfr
Vtn
Lpl
Tubb5
Rarres2
Samsn1
Jak3
Dnajc2
Mcam
Sh2d2a
Mgst1
Tagap
Spint2
Casq2
Efna1
Gm34084
Piezo2
Ostf1
Osr1
4930550L24Rik
Krt8
Gm1604a
Tex30
Hcls1
Dnmt3l
Grn
Col18a1
9230117E06Rik
Srarp
Rbp1
Sox9
Timp1
Gstm7
Bcl6b
Clec4a1
Asb9
Cd209f
Kcnn4
Vpreb1
Cdh11
Kpna2
Mrgpra2b
Arhgap31
Rtp4
Syce2
Prom1
Ckap2
Rarres1
Olfr889
Spib
Ramp2
Cdc42ep3
Rcan2
Fermt1
S100b
Gm37350
Ikzf3
Pou2f2
Gm773
Zcwpw1
H1fx
Plin1
Dpp4
Vamp5
Ung
1700011M02Rik
Tagln2
Blk
D630039A03Rik
Tek
Lama4
Incenp
Tacc3
Tshz2
Tnni1
Ly6a
Epha5
Eno1
Ccdc88c
Siglech
Tdrkh
Chga
Prss23
Gm26870
Tnfsf9
Fn1
Sgo2a
Tcfl5
Bin2
Ncam1
Akap12
Il13
Cd200r3
Lrrc15
Itgb2
Nr0b1
Ctgf
Knl1
Hpgd
Alas2
Gja1
Fstl3
Tubb2b
Maob
Gm2044
Kif20a
AB124611
Klra2
Nedd9
Tmem204
Slc9a3r2
Gsn
Cd44
Gda
En1
Fsd1
Pet2
Peg3
Skap1
Ddx25
Nostrin
Abca1
Gpc3
Sirpb1b
Rhox10
Rasl11a
Myoc
Vegfd
Ifi206
Aldoa
Pirb
Icos
Gzmc
Car4
Colec11
Gm49291
1700013H16Rik
Acsl1
Thrsp
Dut
Arhgdig
Dppa4
Gjb5
Elavl2
Dlx3
Rnf128
Ppan
Lss
Dusp9
Bmp2
Sirpb1c
Gmnn
Gm21188
Hsd17b3
Aldh1a7
Vsir
Nxpe2
Tdrd9
Fyb
Nfkbia
Fam46a
Mall
Sqle
H2afv
Pdlim4
mt-Co3
Ppp1r15a
Plcxd3
Gm33651
Hhip
Cryab
Serpina3f
Cdca2
Mapk13
Klf6
Mcrip2
Mgst2
Col6a2
Steap1
Notch3
Chil1
Retn
Sell
Ly6h
Heyl
Spon1
Arhgap30
Fos
Gsr
Clec4d
Fcmr
Sh2d1a
Tmsb10
Cenpv
Tbxas1
Mgll
Slc6a6
Tex13b
mt-Atp6
Espn
Cck
AC140186.1
G6pc2
Gm16755
Pak3
Wt1
Kif20b
Gm15594
Hist1h1a
Fndc4
Sh3gl3
Nrarp
Dhh
Cenpm
Tcf19
Tcf4
Stc2
Crct1
Rgs10
Tex11
Cpe
Cygb
Fxyd7
Gm15543
Sirpa
Dppa3
Psrc1
Fst
Hsd17b7
Nme1
Hsp90aa1
Gas2l3
Rbpms
Lhfpl4
Wnt4
C1qtnf4
Itga6
Cd19
Tspan15
Tsc22d1
Tex19.2
Grrp1
mt-Nd1
Igf2bp1
Timp3
Actr3b
Topaz1
Tmem255a
Hjurp
Creb5
Fcgr2b
Wisp1
Ankrd31
Tmem59l
Cadm1
Thbs1
Pphln1
AC110211.1
1700024G13Rik
Bora
Fthl17e
Mmrn1
Alox15
Slc22a1
Akr1d1
Cd8a
Procr
Gpr141
Htra1
Cln3
Btg2
Adcy7
Sele
F10
P2ry13
Vwa1
Vgf
Klf4
Pdlim1
Lsr
Tm4sf5
Pcp4
Kif11
Gadd45b
Calcrl
Kmo
Fabp6
Gfi1
Dppa5a
Etnk2
Hrk
Enpep
Dpysl3
Ccdc42
Limch1
Ttyh1
Palmd
Rasgrp2
Nim1k
Nrros
Wee1
Socs2
Krtdap
Tgfbi
Fbxo5
Sox11
Pdgfb
Krt18
Depdc1a
Serping1
Tmem252
Ptgr1
Pmp22
Glipr1
Lgals1
Mro
Tex14
Cdc34
Clspn
Rnf181
Mpped2
Rnase4
Fam167b
Ets1
Plagl1
Creld2
Polr1c
Fam111a
Klhdc8a
Fgfr2
Fasl
Tpsb2
Gm12784
Tfec
Por
Selenoh
Sox2
Itgam
Gm15262
Pim1
Emb
Tmem176b
Gdf3
Slco1a4
Arl4c
Aoc3
Slc39a4
Adcyap1
Kif2c
Spata21
P2ry6
Gsta3
Cdo1
Tmem37
Slfn5
Mpc2
Trim47
Clec2i
St8sia6
Efhd2
Vim
Cirbp
Nexn
Ctsf
Nlrp4c
Spaca9
Col25a1
Gm26522
Efemp1
Jun
Gm17056
Fam43a
Plscr2
Ebf3
Lipg
Cxcl5
Muc16
Gm27217
Wfdc15b
4930529I22Rik
Gm3143
Gm42912
Gm12056
Gm33016
1700067G17Rik
A330033J07Rik
Lrp2
Npvf
Spata4
Irx4
5830473C10Rik
Pon1
Itgax
Gm19585
9930111H07Rik
Musk
Gm12827
Tex46
Gm10634
Gm7276
Gm8369
Fbln2
Kif15
Spint1
Rhox1
Meox2
Traf3ip2
Gabrg3
Rnd2
Larp1b
Slit2
Gucy1a1
Pid1
Mal2
Neil3
Grap
Nr2f2
Pilrb2
Sost
Des
Ifi207
Spns2
Slc25a3
Ttc34
Efna5
Aqp5
Maff
Slc9a3r1
Sbno2
Nrp1
Sp140
Rflnb
Slxl1
H1f0
Lmna
Jaml
Tubb2a
Bex1
Sh3bgrl3
Gm12002
Slc7a8
Caprin2
Selenow
Tifab
Fxyd1
Ahnak
Heatr1
Ppa1
Nanos3
Cdh13
Arl11
Smpx
Rpa2
Lmcd1
Islr
Syngr1
Bcam
Kitl
Nr4a1
Dner
Pdgfra
Cd244
Pax7
Rragd
Epha4
Klrb1f
Phf11a
Gzmk
Mal
H2-Oa
Gm14569
Dtna
Uhrf1
Gpr65
Eomes
Ass1
Anln
H2-DMa
Serpinb6b
Lat
Lonrf3
Osgin1
Malat1
Gm26802
Itga2
Kcng2
Arhgap20
Ndc80
Parp1
Grem1
C1ql4
Kit
Fermt3
Gm4779
Mvk
Mical2
Timp2
Rbm46
4930447C04Rik
Arhgef15
Cd248
Cpz
Prr19
Plp1
Cenpw
Cd200
Arx
Prcd
Selenbp1
Mafb
Adm
Gtpbp4
Unc93b1
Fstl1
Emilin1
Cd300lf
Tlx1
Mdn1
Hormad1
Itih5
Cav2
Asf1b
Tespa1
Ramp1
Cdc25c
Ankrd1
Atad2
Cd9
Gcat
Mfge8
Nrgn
Sh3bgr
Lbhd2
Chd3os
Spata5
Isyna1
Tm6sf1
Chrdl2
Aldh3b1
Pgp
Ccdc34
mt-Nd2
Sgo1
F11r
Sapcd1
Lmnb1
Irf1
Wfdc9
Acly
Emid1
Rpl10l
Adamts1
Morc1
Tdrd1
Nrp2
Nkx1-1
Ska1
Sel1l3
Dst
Cxcr2
Ifi211
Pilra
Cd96
Gpat2
Oit1
Rprm
Fmr1nb
Creg1
Capg
Lrriq4
Stag3
Tst
S100a13
Hoxc10
Gpsm3
Ctsh
Dbf4
Tspan18
Etv4
Etv1
Krt19
Rab32
1700016F12Rik
Ddit4
Smarca5
Filip1
Me1
Jpt1
Trim43b
Asphd2
Emp2
Wipf3
Tmem267
Gm38843
Slc52a3
Defb42
Myh2
Ptx4
Cib1
Fbp1
Cdon
Taf7
Cldn3
Cp
Clec10a
Lhfp
Csf2rb
Carmn
Ncapg
Pgf
Bub1b
Tnnc1
Pgrmc1
Adgrg1
Col26a1
Dbi
Tnfrsf19
Sox4
Ltbp4
1700021F07Rik
Loxl1
Adtrp
Art3
Col5a2
Flt4
Nfkbid
Cgn
Gimap3
Cpne4
Scd2
Trank1
Gna15
Xlr3c
H2-Q10
Il18r1
Gm49016
Trim59
Vdac3
Ptgis
Slfn9
Foxc2
Ntrk1
Gsc
Tnfrsf23
Il1rn
6330403K07Rik
Gjc1
Pkdcc
Ms4a4d
Uba1y
Bub1
Cdkn2d
Zrsr2
Lyn
Abcg3
Lama2
Slc16a11
Cd300lg
Cracr2b
Fdft1
Ddx10
Plaur
mt-Co2
Ppy
Hmgn3
Slc39a1
Dlgap5
Siglecg
Hmcn1
Obp2a
F730016J06Rik
Nppa
Gm7271
Gm43449
Gm14548
Gm35154
Ccr4
Tcrg-C2
Gtsf2
9830107B12Rik
Gpr82
1700034I23Rik
Slc26a5
Gm16158
Bcl2a1a
Vsx2
Magea8
Gm13861
Rasal3
Dleu7
Krtap17-1
Hist1h2ac
Jag2
Inhbb
Pi16
Dscaml1
Mpp6
Cacybp
Islr2
Ncf2
Ednra
Mgat4b
Smim1
Rad51
Trip12
Twist1
Pcdh12
Nuf2
Pmaip1
Lrrc7
Fam241b
Iscu
Cdc25b
Hsd11b2
Fscn1
Dusp6
Gm16104
Wnt6
Fam180a
Notch2
Abcc9
Dynll2
Ncapd2
Tgfb1
Efhd1
Galnt12
Selenom
Polr2e
Hdc
Sulf2
Rangap1
Scin
Crispld2
Cabp1
Cdca7
Fibin
Mns1
Kcnh1
Slc9b1
Lsm8
Pcna
Ildr2
Gabra2
4930438A08Rik
Gm567
Ier2
Pcsk9
Robo4
Thsd1
Rnd1
Jam2
Gpi1
Ube2t
Nkx2-3
Unc45b
Ran
Hist4h4
Oaf
F3
Hat1
Prkch
Greb1
Cplx2
Meioc
Errfi1
Dek
1700054O05Rik
Nup62cl
Nde1
Cdh15
Sbspon
AU015836
Hoxb8
Ces2e
Ccdc85b
Ddit4l
Trac
Dtl
4930558C23Rik
Prb1
Dkk1
Gm2030
Rnf183
2610528J11Rik
Vmn1r15
Gm9999
9230112J17Rik
Prss46
Gm7568
Adgrg4
Clnk
Gm15637
Gm30332
Dlgap2
4930511A02Rik
Col6a1
Cdh22
Adgrg5
Chrm1
Mad2l1
Rbm38
Tmprss13
Neurl3
Kcnk2
Gm14317
M1ap
Hsp90b1
Casp1
Arc
Lhx8
Myl1
Cdh1
Tnfrsf13b
Glis3
Oasl2
Epsti1
Glul
Atp1b1
mt-Nd4
Jag1
Hoxd9
Gbp2
Lgals9
Dnah2os
Gm11730
Reep2
Tctex1d1
4930523C07Rik
Vcan
Unc13b
Mcm5
Cep55
Miox
Sapcd2
Abhd2
Nckap1l
2600014E21Rik
Gdf6
Glipr2
Cebpa
Apbb1ip
Gm525
Cenph
Rcn3
Prr5
Myo1b
Shmt1
Pxdc1
Mobp
Hdac7
Rfc4
Kdm7a
Bhlhe41
Rab44
Sp100
Gsg1l
Lyar
Gm6377
5430427O19Rik
Slc40a1
Rad51ap1
Mir670hg
Bhlhe40
Irx3
Rasl12
Olfr1369-ps1
Atox1
Polr3h
Trpc6
Ssu2
Ciapin1
Asb4
Cpsf4l
Cd247
5033426E14Rik
Tlr13
Fam83d
Fam213a
Sh3bp5
Cit
Vgll2
Acox3
Pdlim2
Hspbap1
Egr2
Epha3
Slc1a6
Mcm3
Bcat1
Nr5a1
Gm16702
Nsg1
Kif4
Chchd2
Exoc3l2
Gm6890
Smad7
Coq7
Shcbp1
Reln
Pgbd5
Gata6
Dlc1
Pcdh11x
Nkx6-1
Lmo4
Ndrg2
Cst3
Camkk2
Lrfn5
Ttn
Grhpr
Thbs3
Arl14epl
Havcr2
Ucp2
Xlr
Itga4
Chst2
Xlr5a
Anxa3
Bok
Brdt
Eogt
Gpc6
Rgs13
Lalba
Rprml
Dapk2
Tmpo
Fblim1
Cldn4
AC139671.1
Pla2g10
Hoxd10
Nrg1
Arap3
Dnmt1
Tmem205
Zfhx2
Adamts4
Gapdh
Unc119b
Ehd2
Gpr171
Nip7
Acod1
Sult1c1
4933406B17Rik
Gm5799
Gm26694
Pglyrp2
Kcnc1
Slc5a11
Zc3h12d
Trdv4
Drd2
Gm16263
Gm49227
Ssxb9
Sun3
Krt87
Cdca5
Kcne1
Scarf1
AC166344.1
Mlf1
Kdelr3
Ina
Pla2g16
Tmcc3
Pax5
Luzp2
Cdkl4
Scimp
Pax9
Cd300lb
Ier5
Lgi1
Utp4
Gprc5a
Snf8
Phkg1
Pfn2
Lxn
Egfl6
Vegfc
Ablim1
Siah1b
Grb14
Wnt5a
Matn2
Ddx46
Ly6e
Prdx3
Aoah
Nek2
Mdh2
Crispld1
1700016K19Rik
Grb10
Atp1a2
Sorbs2
Nucks1
Palld
Msc
Pcsk1n
Dhfr
Anapc15
Tmem221
Ncald
Cdc42ep2
Rhoj
Chrm3
Ifit3
Klhl23
Lsm4
Chka
Kifc1
Ppfibp2
Apobec1
Rnf138
Calm1
Nop14
Cox6a1
Pnma5
Prcp
Sc5d
Zmynd19
Nckap5
AI427809
3830403N18Rik
Tcf15
Elovl2
Dnm3
Ptpre
2900055J20Rik
Pcdh1
Bcan
Lox
Rgs17
Ptprf
Tril
Cox8c
Atp1a3
Tmem35a
Robo2
Rassf4
Zfp518a
Bmx
Prdm1
Siva1
Ropn1l
Slc1a3
Nefl
Bik
Platr26
Msn
Ch25h
BC147527
Olr1
Fam83a
Glb1l3
Steap4
Tspan17
Sox8
Snap25
Gm32255
Klf7
Arhgap11a
Shbg
Tyro3
Rapgef5
Myc
Fam198b
Irf7
