# Supplementary material for: The single-cell chromatin accessibility landscape in mouse perinatal testis development
Source: eLife journal article supplement (doi:10.7554/elife.75624), 2023-04-25
Supplement: supp [file elife-75624-supp-v1.zip › elife_poa_e75624_Supplementary_file_2.bed]

chr1	3119428	3119929	Stroma	48.9258	.
chr1	3120384	3120885	PTM	2.71904	.
chr1	3121659	3122160	Germ cells	6.92519	.
chr1	3132003	3132504	Leydig cells	4.91958	.
chr1	3184967	3185468	Germ cells	14.2382	.
chr1	3185673	3186174	Germ cells	5.35242	.
chr1	3263956	3264457	Germ cells	11.0884	.
chr1	3361216	3361717	Germ cells	14.2382	.
chr1	3445413	3445914	Germ cells	2.98761	.
chr1	3531478	3531979	Germ cells	9.91109	.
chr1	3533002	3533503	Germ cells	13.3939	.
chr1	3556598	3557099	Germ cells	5.54065	.
chr1	3583547	3584048	Germ cells	5.35242	.
chr1	3584101	3584602	Germ cells	22.6929	.
chr1	3670578	3671079	Stroma	375.531	.
chr1	3671533	3672034	Stroma	450.62	.
chr1	3672104	3672605	Germ cells	19.2265	.
chr1	3691151	3691652	Germ cells	11.4149	.
chr1	3726878	3727379	Germ cells	4.06964	.
chr1	3754021	3754522	Germ cells	4.72579	.
chr1	3852048	3852549	Germ cells	4.22458	.
chr1	3852598	3853099	Germ cells	5.54065	.
chr1	3878096	3878597	Germ cells	17.5333	.
chr1	3915660	3916161	Germ cells	5.03701	.
chr1	3934172	3934673	Germ cells	25.0509	.
chr1	4103023	4103524	Germ cells	5.35242	.
chr1	4142419	4142920	Germ cells	9.86842	.
chr1	4352178	4352679	Germ cells	26.2542	.
chr1	4394918	4395419	Germ cells	9.57638	.
chr1	4412413	4412914	Germ cells	6.70201	.
chr1	4416648	4417149	Germ cells	4.06964	.
chr1	4426770	4427271	Sertoli cells	19.3252	.
chr1	4456563	4457064	Germ cells	7.74099	.
chr1	4471255	4471756	Endothelial cells	10.7712	.
chr1	4479483	4479984	Germ cells	8.11233	.
chr1	4491891	4492392	Germ cells	24.4625	.
chr1	4492445	4492946	Germ cells	11.0884	.
chr1	4492969	4493470	Germ cells	14.2382	.
chr1	4496286	4496787	Endothelial cells	10.7712	.
chr1	4496791	4497292	Germ cells	47.3187	.
chr1	4497293	4497794	PTM	9.98254	.
chr1	4522836	4523337	Germ cells	9.57638	.
chr1	4524692	4525193	Germ cells	2.86594	.
chr1	4525569	4526070	Germ cells	6.92519	.
chr1	4543859	4544360	PTM	19.219	.
chr1	4551146	4551647	Germ cells	6.70201	.
chr1	4571523	4572024	Sertoli cells	97.9995	.
chr1	4591081	4591582	Germ cells	20.9906	.
chr1	4609997	4610498	Germ cells	9.86842	.
chr1	4614000	4614501	Germ cells	27.8415	.
chr1	4653824	4654325	Germ cells	30.6934	.
chr1	4688071	4688572	Germ cells	32.141	.
chr1	4689003	4689504	Germ cells	45.7486	.
chr1	4706063	4706564	Stroma	3.67879	.
chr1	4722591	4723092	Sertoli cells	161.265	.
chr1	4766680	4767181	PTM	44.0957	.
chr1	4767266	4767767	Germ cells	3.78685	.
chr1	4770949	4771450	Germ cells	5.35242	.
chr1	4785448	4785949	Germ cells	34.3172	.
chr1	4802478	4802979	Germ cells	6.92519	.
chr1	4807472	4807973	Germ cells	175.079	.
chr1	4808111	4808612	Stroma	20.5174	.
chr1	4819984	4820485	Stroma	7.71033	.
chr1	4856843	4857344	Stroma	7.6265	.
chr1	4857500	4858001	Germ cells	79.0416	.
chr1	4858058	4858559	Stroma	166.662	.
chr1	4911671	4912172	Germ cells	11.0884	.
chr1	4923633	4924134	Germ cells	9.57638	.
chr1	4938694	4939195	Sertoli cells	8.83297	.
chr1	4947146	4947647	Germ cells	6.69264	.
chr1	4991509	4992010	Germ cells	9.91109	.
chr1	5017846	5018347	Germ cells	9.57638	.
chr1	5018547	5019048	Germ cells	23.6801	.
chr1	5019164	5019665	Germ cells	66.9157	.
chr1	5019960	5020461	Germ cells	35.0774	.
chr1	5020515	5021016	Germ cells	15.8401	.
chr1	5022678	5023179	Germ cells	78.9107	.
chr1	5023322	5023823	Germ cells	19.6732	.
chr1	5082852	5083353	Stroma	560.257	.
chr1	5109333	5109834	Germ cells	8.11233	.
chr1	5109914	5110415	Germ cells	12.1933	.
chr1	5158723	5159224	Germ cells	6.70201	.
chr1	5170407	5170908	Germ cells	3.80624	.
chr1	5183295	5183796	Germ cells	13.0052	.
chr1	5207011	5207512	Germ cells	20.9469	.
chr1	5225828	5226329	Germ cells	6.70201	.
chr1	5242584	5243085	Germ cells	4.06964	.
chr1	5243159	5243660	Germ cells	5.35242	.
chr1	5260797	5261298	Germ cells	4.06964	.
chr1	5261449	5261950	Germ cells	5.54065	.
chr1	5288141	5288642	Germ cells	9.86842	.
chr1	5288711	5289212	Germ cells	2.98761	.
chr1	5297139	5297640	Germ cells	3.78685	.
chr1	5516522	5517023	Germ cells	9.57638	.
chr1	5588187	5588688	Germ cells	89.4742	.
chr1	5602242	5602743	Germ cells	5.35242	.
chr1	5660186	5660687	Germ cells	2.6191	.
chr1	5788361	5788862	Germ cells	8.36954	.
chr1	5828866	5829367	Germ cells	5.54065	.
chr1	5915267	5915768	Sertoli cells	15.0213	.
chr1	5916253	5916754	Germ cells	15.8695	.
chr1	5916788	5917289	Germ cells	17.5333	.
chr1	5917469	5917970	Germ cells	8.11233	.
chr1	6073085	6073586	Germ cells	3.78685	.
chr1	6073673	6074174	Germ cells	14.6343	.
chr1	6076567	6077068	Sertoli cells	59.947	.
chr1	6082696	6083197	Germ cells	5.03701	.
chr1	6089647	6090148	Germ cells	8.80634	.
chr1	6132951	6133452	Germ cells	2.86594	.
chr1	6214342	6214843	Sertoli cells	183.318	.
chr1	6214973	6215474	Germ cells	36.5655	.
chr1	6282393	6282894	Germ cells	18.6717	.
chr1	6287956	6288457	Stroma	9.12224	.
chr1	6358543	6359044	Germ cells	6.92519	.
chr1	6359081	6359582	Germ cells	11.4149	.
chr1	6359935	6360436	Germ cells	5.03701	.
chr1	6382758	6383259	Germ cells	14.2382	.
chr1	6400664	6401165	Germ cells	8.11233	.
chr1	6441008	6441509	Germ cells	14.6343	.
chr1	6466652	6467153	Germ cells	6.3579	.
chr1	6483229	6483730	Sertoli cells	6.58042	.
chr1	6805167	6805668	Sertoli cells	10.7968	.
chr1	6866777	6867278	Sertoli cells	63.8191	.
chr1	6873825	6874326	Germ cells	8.36954	.
chr1	6931824	6932325	Sertoli cells	16.3387	.
chr1	6980809	6981310	Germ cells	5.35242	.
chr1	7010253	7010754	PTM	7.45367	.
chr1	7013580	7014081	Germ cells	6.3579	.
chr1	7055053	7055554	Stroma	5.19907	.
chr1	7088008	7088509	Sertoli cells	16.3387	.
chr1	7088551	7089052	Stroma	2441.7	.
chr1	7089163	7089664	Stroma	100.196	.
chr1	7104985	7105486	Stroma	13.5771	.
chr1	7119325	7119826	Sertoli cells	5.51291	.
chr1	7177630	7178131	Germ cells	6.70201	.
chr1	7178726	7179227	Germ cells	16.2985	.
chr1	7180869	7181370	Germ cells	11.4149	.
chr1	7187020	7187521	Germ cells	7.74099	.
chr1	7205932	7206433	Sertoli cells	3.11114	.
chr1	7206528	7207029	Leydig cells	18.3809	.
chr1	7271489	7271990	Germ cells	14.2382	.
chr1	7287557	7288058	Germ cells	2.98761	.
chr1	7293324	7293825	Germ cells	14.6054	.
chr1	7312268	7312769	Germ cells	4.22458	.
chr1	7395454	7395955	Neutrophils	9.86578	.
chr1	7396527	7397028	Germ cells	5.6892	.
chr1	7397188	7397689	Stroma	71.2057	.
chr1	7397690	7398191	PTM	874.734	.
chr1	7398369	7398870	PTM	11.3543	.
chr1	7415048	7415549	Germ cells	7.74099	.
chr1	7470798	7471299	Germ cells	3.78685	.
chr1	7518592	7519093	Germ cells	15.8695	.
chr1	7549956	7550457	Germ cells	2.93598	.
chr1	7574175	7574676	Germ cells	8.36954	.
chr1	7652250	7652751	Germ cells	4.72579	.
chr1	7658928	7659429	Germ cells	3.80624	.
chr1	7663928	7664429	Germ cells	6.70201	.
chr1	7691177	7691678	Germ cells	4.22458	.
chr1	7709963	7710464	Germ cells	4.06964	.
chr1	7741504	7742005	Germ cells	3.78685	.
chr1	7777108	7777609	Germ cells	11.0884	.
chr1	7777671	7778172	Sertoli cells	3.48776	.
chr1	7779687	7780188	Germ cells	6.92519	.
chr1	7915366	7915867	Germ cells	19.6732	.
chr1	7972666	7973167	Germ cells	11.0884	.
chr1	8017569	8018070	Germ cells	7.74099	.
chr1	8089757	8090258	Germ cells	5.54065	.
chr1	8123011	8123512	Stroma	46.4347	.
chr1	8248951	8249452	Germ cells	8.36954	.
chr1	8261356	8261857	Germ cells	8.11233	.
chr1	8288429	8288930	Germ cells	6.3579	.
chr1	8410620	8411121	Stroma	41.1275	.
chr1	8468560	8469061	Germ cells	9.57638	.
chr1	8469172	8469673	Germ cells	4.72579	.
chr1	8470129	8470630	Germ cells	5.35242	.
chr1	8470785	8471286	Germ cells	11.0884	.
chr1	8732418	8732919	Germ cells	6.70201	.
chr1	8744960	8745461	Germ cells	5.54065	.
chr1	8745618	8746119	Germ cells	3.78685	.
chr1	8810619	8811120	Germ cells	4.06964	.
chr1	8818966	8819467	Germ cells	6.92519	.
chr1	8855814	8856315	Germ cells	7.74099	.
chr1	8856555	8857056	Germ cells	8.80634	.
chr1	8859152	8859653	Germ cells	13.0052	.
chr1	8925295	8925796	Germ cells	13.0052	.
chr1	8930150	8930651	Germ cells	4.22458	.
chr1	8936768	8937269	Germ cells	5.54065	.
chr1	8963117	8963618	Germ cells	4.22458	.
chr1	9058190	9058691	Germ cells	4.22458	.
chr1	9120784	9121285	Germ cells	9.57638	.
chr1	9228827	9229328	Germ cells	5.35242	.
chr1	9237188	9237689	PTM	50.2592	.
chr1	9238352	9238853	Sertoli cells	17.6036	.
chr1	9298351	9298852	Germ cells	155.235	.
chr1	9298999	9299500	Sertoli cells	11.9733	.
chr1	9299562	9300063	Germ cells	25.04	.
chr1	9313309	9313810	Germ cells	2.86594	.
chr1	9313845	9314346	Germ cells	9.57638	.
chr1	9356858	9357359	Germ cells	13.0052	.
chr1	9469205	9469706	Germ cells	8.11233	.
chr1	9469918	9470419	Germ cells	5.35242	.
chr1	9474954	9475455	PTM	26.5721	.
chr1	9541171	9541672	Stroma	17.1237	.
chr1	9545050	9545551	Germ cells	370.197	.
chr1	9545860	9546361	Germ cells	24.4625	.
chr1	9547850	9548351	PTM	66.3556	.
chr1	9548362	9548863	Neutrophils	2.88217	.
chr1	9548918	9549419	Stroma	11.7856	.
chr1	9553828	9554329	Sertoli cells	8.11252	.
chr1	9563693	9564194	Sertoli cells	8.11252	.
chr1	9564391	9564892	Sertoli cells	70.8701	.
chr1	9565144	9565645	PTM	7.65393	.
chr1	9573192	9573693	Sertoli cells	11.5526	.
chr1	9583143	9583644	Sertoli cells	9.22839	.
chr1	9601249	9601750	Germ cells	8.36954	.
chr1	9601906	9602407	Sertoli cells	16.5195	.
chr1	9609875	9610376	Germ cells	11.4149	.
chr1	9610688	9611189	Germ cells	4.22458	.
chr1	9611540	9612041	Sertoli cells	22.0923	.
chr1	9619308	9619809	Sertoli cells	4.02142	.
chr1	9621333	9621834	Sertoli cells	25.1917	.
chr1	9630202	9630703	Sertoli cells	7.03064	.
chr1	9636960	9637461	Germ cells	5.6892	.
chr1	9648614	9649115	Stroma	40.3431	.
chr1	9649205	9649706	Stroma	417.596	.
chr1	9658783	9659284	Germ cells	11.0451	.
chr1	9699202	9699703	Sertoli cells	6.96777	.
chr1	9699716	9700217	Sertoli cells	55.4345	.
chr1	9700422	9700923	Leydig cells	97.9656	.
chr1	9701023	9701524	Sertoli cells	15.2418	.
chr1	9716307	9716808	Germ cells	2.98761	.
chr1	9747664	9748165	Stroma	321.216	.
chr1	9748206	9748707	Stroma	1286.02	.
chr1	9755548	9756049	Sertoli cells	11.222	.
chr1	9756186	9756687	Sertoli cells	2.52566	.
chr1	9756844	9757345	Sertoli cells	10.6402	.
chr1	9758086	9758587	Sertoli cells	29.9827	.
chr1	9758648	9759149	Sertoli cells	33.2629	.
chr1	9768633	9769134	Sertoli cells	26.7705	.
chr1	9772705	9773206	Stroma	48.9258	.
chr1	9773472	9773973	Sertoli cells	7.68819	.
chr1	9784183	9784684	Sertoli cells	13.3383	.
chr1	9795143	9795644	Germ cells	7.74099	.
chr1	9797915	9798416	Stroma	128.716	.
chr1	9798452	9798953	Innate lymph	5.2675	.
chr1	9825642	9826143	Germ cells	9.17847	.
chr1	9847310	9847811	Germ cells	5.54065	.
chr1	9848109	9848610	Germ cells	26.8572	.
chr1	9851332	9851833	PTM	4.1717	.
chr1	9852895	9853396	Sertoli cells	6.96777	.
chr1	9857753	9858254	Germ cells	2.98761	.
chr1	9878327	9878828	Sertoli cells	6.85867	.
chr1	9908387	9908888	Germ cells	39.3146	.
chr1	9908979	9909480	Germ cells	38.0662	.
chr1	9942895	9943396	PTM	5.63752	.
chr1	9943890	9944391	Leydig cells	145.577	.
chr1	9944393	9944894	Germ cells	7.73277	.
chr1	9947151	9947652	Leydig cells	6.23014	.
chr1	9947903	9948404	Leydig cells	7.59928	.
chr1	9957113	9957614	Germ cells	3.80624	.
chr1	9966994	9967495	Sertoli cells	30.3607	.
chr1	9967683	9968184	Germ cells	49.1262	.
chr1	9968249	9968750	Stroma	12.6729	.
chr1	9969029	9969530	Germ cells	7.74099	.
chr1	9982939	9983440	Neutrophils	6.46807	.
chr1	9989904	9990405	Neutrophils	2.88217	.
chr1	9991740	9992241	Neutrophils	51.4564	.
chr1	9992244	9992745	Neutrophils	13.6179	.
chr1	9997462	9997963	Neutrophils	14.2212	.
chr1	10007161	10007662	Sertoli cells	8.2048	.
chr1	10008905	10009406	Sertoli cells	132.396	.
chr1	10015858	10016359	Germ cells	8.80634	.
chr1	10037687	10038188	Leydig cells	157.266	.
chr1	10038209	10038710	Stroma	18.463	.
chr1	10038790	10039291	Sertoli cells	22.0923	.
chr1	10039466	10039967	Stroma	279.534	.
chr1	10040116	10040617	Stroma	25.878	.
chr1	10089481	10089982	Stroma	9.97609	.
chr1	10226869	10227370	Sertoli cells	4.49009	.
chr1	10231791	10232292	PTM	13.3966	.
chr1	10232294	10232795	Stroma	105.43	.
chr1	10232840	10233341	Stroma	354.544	.
chr1	10233543	10234044	Stroma	9.90823	.
chr1	10239047	10239548	Germ cells	7.74099	.
chr1	10254852	10255353	Neutrophils	4.72413	.
chr1	10255471	10255972	Sertoli cells	3.48776	.
chr1	10259474	10259975	Germ cells	11.4149	.
chr1	10278891	10279392	Sertoli cells	8.07976	.
chr1	10285389	10285890	Sertoli cells	33.6825	.
chr1	10294591	10295092	Germ cells	20.9469	.
chr1	10304501	10305002	Germ cells	2.6191	.
chr1	10315161	10315662	Neutrophils	2.88217	.
chr1	10317451	10317952	Neutrophils	4.4674	.
chr1	10514624	10515125	Germ cells	15.8695	.
chr1	10656103	10656604	Germ cells	5.54065	.
chr1	10656709	10657210	Germ cells	4.22458	.
chr1	10694905	10695406	Germ cells	15.3669	.
chr1	10719719	10720220	Germ cells	9.57638	.
chr1	10805157	10805658	Germ cells	19.7183	.
chr1	10805885	10806386	Germ cells	6.69264	.
chr1	10874998	10875499	Sertoli cells	15.0213	.
chr1	10877364	10877865	PTM	10.3923	.
chr1	10898781	10899282	Sertoli cells	5.98581	.
chr1	10932849	10933350	Germ cells	13.0052	.
chr1	10933827	10934328	Germ cells	14.6343	.
chr1	10970559	10971060	Germ cells	8.36954	.
chr1	10993335	10993836	Germ cells	15.8695	.
chr1	11065165	11065666	Germ cells	3.78685	.
chr1	11107757	11108258	Germ cells	8.36954	.
chr1	11177628	11178129	Sertoli cells	12.757	.
chr1	11223564	11224065	Germ cells	3.78685	.
chr1	11295075	11295576	Germ cells	9.57638	.
chr1	11324502	11325003	Germ cells	8.11233	.
chr1	11329439	11329940	Germ cells	19.7183	.
chr1	11387115	11387616	Germ cells	2.98761	.
chr1	11413954	11414455	Sertoli cells	205.113	.
chr1	11414541	11415042	Germ cells	9.57638	.
chr1	11458312	11458813	PTM	25.8951	.
chr1	11462087	11462588	Germ cells	5.35242	.
chr1	11466934	11467435	Sertoli cells	3.48776	.
chr1	11521520	11522021	Germ cells	11.0451	.
chr1	11564765	11565266	Germ cells	4.06964	.
chr1	11579991	11580492	Germ cells	5.35242	.
chr1	11588184	11588685	Germ cells	9.91109	.
chr1	11757819	11758320	Germ cells	11.0884	.
chr1	11961366	11961867	Germ cells	6.70201	.
chr1	11972246	11972747	Germ cells	5.6892	.
chr1	11996399	11996900	Stroma	18.3286	.
chr1	12008739	12009240	Stroma	26.6229	.
chr1	12120907	12121408	Leydig cells	4.91958	.
chr1	12170464	12170965	Germ cells	6.70201	.
chr1	12291795	12292296	Stroma	6.73516	.
chr1	12292427	12292928	Stroma	16.4649	.
chr1	12422569	12423070	Germ cells	6.70201	.
chr1	12552110	12552611	Germ cells	4.06964	.
chr1	12587137	12587638	Germ cells	3.80624	.
chr1	12612048	12612549	Stroma	6.85625	.
chr1	12643930	12644431	Germ cells	13.3939	.
chr1	12691708	12692209	Stroma	10.9157	.
chr1	12692224	12692725	Stroma	61.8066	.
chr1	12692776	12693277	Stroma	34.4612	.
chr1	12697923	12698424	Stroma	8.41846	.
chr1	12707521	12708022	Germ cells	4.22458	.
chr1	12711261	12711762	Germ cells	9.17847	.
chr1	12715384	12715885	Stroma	13.3864	.
chr1	12718007	12718508	PTM	128.416	.
chr1	12729536	12730037	Germ cells	75.4458	.
chr1	12763166	12763667	PTM	7.45367	.
chr1	12764101	12764602	Stroma	78.8148	.
chr1	12764848	12765349	Stroma	11.4151	.
chr1	12771464	12771965	PTM	16.6074	.
chr1	12808020	12808521	Germ cells	7.74099	.
chr1	12814230	12814731	PTM	4.77864	.
chr1	12835215	12835716	PTM	65.6514	.
chr1	12836074	12836575	PTM	9.98254	.
chr1	12836782	12837283	PTM	2.71904	.
chr1	12840353	12840854	Germ cells	6.69264	.
chr1	12850777	12851278	Germ cells	11.0884	.
chr1	12851487	12851988	Germ cells	4.06964	.
chr1	12863952	12864453	Stroma	23.4223	.
chr1	12865048	12865549	Germ cells	82.4044	.
chr1	12871699	12872200	PTM	3.95627	.
chr1	12874292	12874793	Sertoli cells	3.48776	.
chr1	12877704	12878205	PTM	16.6074	.
chr1	12984657	12985158	Germ cells	3.78685	.
chr1	12990101	12990602	Germ cells	25.5995	.
chr1	12990907	12991408	Stroma	156.517	.
chr1	12991472	12991973	Stroma	16.3839	.
chr1	12992073	12992574	Stroma	315.83	.
chr1	12992828	12993329	Macrophages	2.30469	.
chr1	12995937	12996438	Germ cells	6.70201	.
chr1	13002054	13002555	PTM	6.66749	.
chr1	13015308	13015809	Germ cells	4.06964	.
chr1	13028873	13029374	Germ cells	9.86842	.
chr1	13049829	13050330	Germ cells	6.92519	.
chr1	13050387	13050888	Germ cells	4.06964	.
chr1	13052027	13052528	Germ cells	9.57638	.
chr1	13068788	13069289	Germ cells	3.78685	.
chr1	13069344	13069845	Germ cells	8.11233	.
chr1	13075978	13076479	Germ cells	11.4149	.
chr1	13095369	13095870	Germ cells	2.93598	.
chr1	13103247	13103748	Stroma	5.38611	.
chr1	13103840	13104341	Stroma	25.5447	.
chr1	13105023	13105524	Germ cells	6.70201	.
chr1	13118345	13118846	Germ cells	7.73277	.
chr1	13124180	13124681	Stroma	3.67879	.
chr1	13125230	13125731	Stroma	35.2459	.
chr1	13125752	13126253	Stroma	12.6534	.
chr1	13126444	13126945	Stroma	48.4555	.
chr1	13126998	13127499	Stroma	23.1443	.
chr1	13127705	13128206	Stroma	10.4548	.
chr1	13128304	13128805	Stroma	34.0961	.
chr1	13134238	13134739	Sertoli cells	13.9872	.
chr1	13135915	13136416	PTM	14.307	.
chr1	13151017	13151518	Stroma	9.90823	.
chr1	13154739	13155240	Macrophages	2.30469	.
chr1	13162325	13162826	Macrophages	3.68764	.
chr1	13188411	13188912	Stroma	3.93237	.
chr1	13190349	13190850	Stroma	17.4567	.
chr1	13191837	13192338	Stroma	3.30008	.
chr1	13194172	13194673	Sertoli cells	6.85867	.
chr1	13194757	13195258	Sertoli cells	19.1404	.
chr1	13214363	13214864	PTM	7.45367	.
chr1	13225249	13225750	Sertoli cells	10.3757	.
chr1	13225835	13226336	Sertoli cells	19.3252	.
chr1	13227903	13228404	Sertoli cells	3.11114	.
chr1	13242120	13242621	Stroma	3.142	.
chr1	13253742	13254243	Sertoli cells	17.8195	.
chr1	13255150	13255651	Stroma	6.00752	.
chr1	13255689	13256190	PTM	29.0941	.
chr1	13256270	13256771	Stroma	10.9157	.
chr1	13259492	13259993	Macrophages	4.06885	.
chr1	13266718	13267219	Sertoli cells	9.4822	.
chr1	13291200	13291701	Sertoli cells	2.59994	.
chr1	13293384	13293885	PTM	13.0176	.
chr1	13301508	13302009	Macrophages	7.32573	.
chr1	13329450	13329951	Sertoli cells	36.3403	.
chr1	13360570	13361071	Germ cells	15.8401	.
chr1	13366344	13366845	Stroma	10.9157	.
chr1	13371791	13372292	PTM	22.3002	.
chr1	13372345	13372846	Stroma	1906.33	.
chr1	13373351	13373852	Stroma	85.8188	.
chr1	13373904	13374405	Stroma	129.688	.
chr1	13374529	13375030	Stroma	48.4555	.
chr1	13391709	13392210	Sertoli cells	13.7284	.
chr1	13426343	13426844	Stroma	223.197	.
chr1	13426989	13427490	Germ cells	14.6054	.
chr1	13427986	13428487	PTM	8.4064	.
chr1	13434638	13435139	PTM	25.3097	.
chr1	13465347	13465848	Germ cells	2.98761	.
chr1	13494717	13495218	Stroma	11.7856	.
chr1	13513793	13514294	Macrophages	6.75026	.
chr1	13518262	13518763	Germ cells	5.35242	.
chr1	13530792	13531293	Stroma	26.7033	.
chr1	13531435	13531936	Sertoli cells	58.2253	.
chr1	13535077	13535578	Germ cells	12.2065	.
chr1	13543961	13544462	Leydig cells	2.51472	.
chr1	13561470	13561971	Stroma	287.718	.
chr1	13584068	13584569	Sertoli cells	5.68246	.
chr1	13589139	13589640	Stroma	155.395	.
chr1	13589760	13590261	Stroma	766.72	.
chr1	13593096	13593597	Macrophages	5.17738	.
chr1	13619461	13619962	Germ cells	5.6892	.
chr1	13621788	13622289	Germ cells	8.11233	.
chr1	13647787	13648288	Macrophages	5.32766	.
chr1	13648944	13649445	Stroma	3.37842	.
chr1	13649539	13650040	Stroma	133.35	.
chr1	13659717	13660218	Stroma	103.949	.
chr1	13660323	13660824	Sertoli cells	167.871	.
chr1	13664983	13665484	Stroma	14.4973	.
chr1	13669531	13670032	PTM	21.1304	.
chr1	13706270	13706771	PTM	14.4481	.
chr1	13738649	13739150	Stroma	5.38611	.
chr1	13774462	13774963	Sertoli cells	3.48776	.
chr1	13789150	13789651	Stroma	81.6008	.
chr1	13839882	13840383	Germ cells	5.54065	.
chr1	13843097	13843598	Germ cells	5.54065	.
chr1	13915187	13915688	Germ cells	7.74099	.
chr1	13940701	13941202	Germ cells	5.54065	.
chr1	14108257	14108758	Stroma	5.19907	.
chr1	14108937	14109438	Stroma	6.85625	.
chr1	14132787	14133288	Germ cells	2.86594	.
chr1	14133292	14133793	Germ cells	6.92519	.
chr1	14145946	14146447	PTM	16.599	.
chr1	14146752	14147253	PTM	14.307	.
chr1	14162307	14162808	PTM	5.79407	.
chr1	14288056	14288557	Germ cells	6.92519	.
chr1	14292028	14292529	Leydig cells	7.59928	.
chr1	14304936	14305437	Stroma	3.37842	.
chr1	14309620	14310121	Germ cells	41.2448	.
chr1	14406621	14407122	Leydig cells	13.8519	.
chr1	14419110	14419611	PTM	10.3923	.
chr1	14491153	14491654	Leydig cells	2.51472	.
chr1	14496030	14496531	Germ cells	5.03701	.
chr1	14496596	14497097	Germ cells	13.7621	.
chr1	14497928	14498429	Germ cells	13.0052	.
chr1	14504257	14504758	Stroma	19.3217	.
chr1	14506417	14506918	Stroma	85.8188	.
chr1	14506937	14507438	Stroma	17.4567	.
chr1	14513468	14513969	Macrophages	2.58586	.
chr1	14589851	14590352	Stroma	69.8451	.
chr1	14616227	14616728	Germ cells	11.0451	.
chr1	14631614	14632115	Germ cells	5.35242	.
chr1	14646954	14647455	Germ cells	5.35242	.
chr1	14739507	14740008	Germ cells	9.17847	.
chr1	14755250	14755751	Germ cells	36.6002	.
chr1	14756913	14757414	Stroma	6.73516	.
chr1	14775321	14775822	Sertoli cells	4.63266	.
chr1	14794160	14794661	Stroma	8.41846	.
chr1	14794829	14795330	Stroma	13.5771	.
chr1	14795340	14795841	PTM	15.443	.
chr1	14839970	14840471	Germ cells	12.6438	.
chr1	14918619	14919120	Germ cells	11.0884	.
chr1	14919146	14919647	Germ cells	2.6191	.
chr1	15018064	15018565	Germ cells	6.3579	.
chr1	15152220	15152721	Germ cells	6.70201	.
chr1	15219412	15219913	Germ cells	6.70201	.
chr1	15255599	15256100	Germ cells	8.11233	.
chr1	15256348	15256849	Germ cells	7.74099	.
chr1	15286104	15286605	Germ cells	8.11233	.
chr1	15286650	15287151	Stroma	228.591	.
chr1	15287230	15287731	Stroma	11.6123	.
chr1	15312609	15313110	Germ cells	9.57638	.
chr1	15544187	15544688	Leydig cells	2.48797	.
chr1	15553681	15554182	Germ cells	3.78685	.
chr1	15605451	15605952	Leydig cells	5.40974	.
chr1	15610337	15610838	Leydig cells	7.00357	.
chr1	15644134	15644635	Germ cells	18.375	.
chr1	15644638	15645139	Stroma	65.7986	.
chr1	15651029	15651530	Germ cells	35.0774	.
chr1	15651812	15652313	PTM	5.79407	.
chr1	15659516	15660017	Germ cells	9.57638	.
chr1	15710628	15711129	Germ cells	6.3579	.
chr1	15711156	15711657	Germ cells	6.70201	.
chr1	15754991	15755492	Sertoli cells	8.2048	.
chr1	15768819	15769320	Germ cells	6.92519	.
chr1	15805360	15805861	Stroma	1167.54	.
chr1	15806062	15806563	PTM	54.7632	.
chr1	15875368	15875869	Stroma	9.51641	.
chr1	15883530	15884031	Germ cells	35.0774	.
chr1	15891920	15892421	Stroma	5.38611	.
chr1	15892464	15892965	Stroma	66.5483	.
chr1	15900004	15900505	Stroma	9.12224	.
chr1	15902343	15902844	Germ cells	10.664	.
chr1	15907150	15907651	Germ cells	14.2382	.
chr1	15912780	15913281	Stroma	7.49666	.
chr1	15913450	15913951	Stroma	32.9555	.
chr1	15976332	15976833	Stroma	7.6265	.
chr1	15976962	15977463	Stroma	68.4903	.
chr1	16028937	16029438	Germ cells	5.35242	.
chr1	16058130	16058631	Stroma	10.9157	.
chr1	16058784	16059285	Stroma	7.49666	.
chr1	16059452	16059953	Stroma	28.4901	.
chr1	16092900	16093401	Germ cells	20.9469	.
chr1	16093551	16094052	Germ cells	6.3579	.
chr1	16103551	16104052	Stroma	29.5915	.
chr1	16104154	16104655	Stroma	659.707	.
chr1	16104747	16105248	Stroma	1108.4	.
chr1	16105563	16106064	Stroma	363.905	.
chr1	16106244	16106745	Stroma	41.5453	.
chr1	16115780	16116281	Germ cells	6.70201	.
chr1	16135274	16135775	Stroma	6.10903	.
chr1	16139085	16139586	PTM	27.8481	.
chr1	16159038	16159539	Germ cells	23.6801	.
chr1	16159729	16160230	Germ cells	2.86594	.
chr1	16172233	16172734	Germ cells	8.11233	.
chr1	16174356	16174857	Stroma	4.01905	.
chr1	16177465	16177966	PTM	138.563	.
chr1	16179843	16180344	Stroma	25.5447	.
chr1	16186370	16186871	Stroma	5.99662	.
chr1	16214910	16215411	Germ cells	53.7018	.
chr1	16227477	16227978	Stroma	15.4881	.
chr1	16228137	16228638	Stroma	42.3291	.
chr1	16229453	16229954	Stroma	11.7425	.
chr1	16248459	16248960	Stroma	8.28902	.
chr1	16249002	16249503	Stroma	50.1826	.
chr1	16249642	16250143	PTM	6.0749	.
chr1	16258330	16258831	Stroma	4.47515	.
chr1	16268927	16269428	Leydig cells	30.9692	.
chr1	16346980	16347481	Stroma	41.1275	.
chr1	16372021	16372522	Sertoli cells	48.747	.
chr1	16374224	16374725	Sertoli cells	21.8415	.
chr1	16491142	16491643	Germ cells	9.57638	.
chr1	16518351	16518852	Stroma	32.1721	.
chr1	16518990	16519491	Stroma	107.556	.
chr1	16519545	16520046	Stroma	462.54	.
chr1	16617988	16618489	Stroma	5.28235	.
chr1	16618548	16619049	Stroma	111.396	.
chr1	16619120	16619621	Stroma	870.376	.
chr1	16656186	16656687	Macrophages	2.58586	.
chr1	16656690	16657191	Stroma	1139.85	.
chr1	16657195	16657696	PTM	59.3445	.
chr1	16664930	16665431	Germ cells	35.4977	.
chr1	16665607	16666108	Sertoli cells	11.5526	.
chr1	16687792	16688293	Stroma	11.6123	.
chr1	16688495	16688996	Stroma	249.438	.
chr1	16723712	16724213	Germ cells	7.73277	.
chr1	16758168	16758669	Germ cells	15.8401	.
chr1	16798272	16798773	Stroma	15.225	.
chr1	17091367	17091868	Germ cells	12.1933	.
chr1	17096796	17097297	Germ cells	22.6929	.
chr1	17097685	17098186	Stroma	501.127	.
chr1	17123358	17123859	Stroma	52.7178	.
chr1	17124425	17124926	Germ cells	27.3867	.
chr1	17145155	17145656	Germ cells	20.9469	.
chr1	17150794	17151295	Germ cells	2.98761	.
chr1	17482910	17483411	Germ cells	17.9933	.
chr1	17601357	17601858	Stroma	21.3471	.
chr1	17601872	17602373	Stroma	4.6889	.
chr1	17602496	17602997	Stroma	6.73516	.
chr1	17606891	17607392	Stroma	5.19907	.
chr1	17644805	17645306	Germ cells	8.11233	.
chr1	17655664	17656165	PTM	7.54202	.
chr1	17657414	17657915	PTM	27.1205	.
chr1	17661075	17661576	Germ cells	2.98761	.
chr1	17665817	17666318	PTM	7.45367	.
chr1	17727182	17727683	Germ cells	22.6929	.
chr1	17727709	17728210	PTM	4.77864	.
chr1	17742029	17742530	PTM	25.1842	.
chr1	18016227	18016728	Germ cells	22.3264	.
chr1	18056975	18057476	Germ cells	9.86842	.
chr1	18057977	18058478	Germ cells	15.8695	.
chr1	18058498	18058999	Germ cells	6.92519	.
chr1	18158894	18159395	Germ cells	2.6191	.
chr1	18213322	18213823	Germ cells	6.92519	.
chr1	18214255	18214756	Germ cells	5.54065	.
chr1	18323290	18323791	Germ cells	8.36954	.
chr1	18408612	18409113	Germ cells	8.11233	.
chr1	18472023	18472524	Germ cells	2.86594	.
chr1	18472718	18473219	Germ cells	4.22458	.
chr1	18492139	18492640	Germ cells	1.84716	.
chr1	18492647	18493148	Germ cells	9.86842	.
chr1	18493998	18494499	Germ cells	5.54065	.
chr1	18589532	18590033	Germ cells	8.36954	.
chr1	18658669	18659170	Germ cells	6.70201	.
chr1	18773925	18774426	Germ cells	6.70201	.
chr1	18919720	18920221	Germ cells	6.70201	.
chr1	19036858	19037359	Germ cells	4.22458	.
chr1	19096824	19097325	Germ cells	9.91109	.
chr1	19103948	19104449	Germ cells	9.57638	.
chr1	19109639	19110140	Stroma	23.4223	.
chr1	19139084	19139585	Germ cells	6.3579	.
chr1	19209729	19210230	Stroma	60.4885	.
chr1	19210497	19210998	Germ cells	9.91109	.
chr1	19211745	19212246	Stroma	5.92496	.
chr1	19214004	19214505	Germ cells	8.36954	.
chr1	19226289	19226790	Germ cells	8.80634	.
chr1	19230774	19231275	Germ cells	7.73277	.
chr1	19233871	19234372	Germ cells	12.6438	.
chr1	19236560	19237061	Germ cells	30.6934	.
chr1	19241322	19241823	Germ cells	12.2065	.
chr1	19258607	19259108	Germ cells	5.54065	.
chr1	19300263	19300764	Germ cells	9.86842	.
chr1	19331557	19332058	Germ cells	7.73277	.
chr1	19344539	19345040	Germ cells	12.2065	.
chr1	19389097	19389598	Leydig cells	12.162	.
chr1	19440658	19441159	Germ cells	6.70201	.
chr1	19449697	19450198	Germ cells	11.0884	.
chr1	19460061	19460562	Germ cells	6.92519	.
chr1	19767274	19767775	Germ cells	4.06964	.
chr1	19849842	19850343	Sertoli cells	4.49009	.
chr1	19899714	19900215	Germ cells	9.86842	.
chr1	19969168	19969669	Germ cells	5.35242	.
chr1	20058177	20058678	Sertoli cells	17.6036	.
chr1	20253815	20254316	Germ cells	6.70201	.
chr1	20344359	20344860	Sertoli cells	5.68246	.
chr1	20450022	20450523	Sertoli cells	9.22839	.
chr1	20477784	20478285	Germ cells	9.57638	.
chr1	20554347	20554848	Sertoli cells	12.4615	.
chr1	20612649	20613150	Stroma	8.28902	.
chr1	20654162	20654663	Sertoli cells	5.68246	.
chr1	20671795	20672296	Sertoli cells	10.3757	.
chr1	20677983	20678484	Stroma	5.18644	.
chr1	20731993	20732494	Sertoli cells	9.4822	.
chr1	20733563	20734064	Germ cells	9.86842	.
chr1	20738445	20738946	Sertoli cells	3.11114	.
chr1	20743776	20744277	Germ cells	7.73277	.
chr1	20757521	20758022	Leydig cells	4.91958	.
chr1	20769745	20770246	Germ cells	5.54065	.
chr1	20786645	20787146	Germ cells	6.70201	.
chr1	20788412	20788913	Stroma	4.42206	.
chr1	20801653	20802154	Stroma	17.4567	.
chr1	20803818	20804319	Sertoli cells	11.5526	.
chr1	20804416	20804917	Sertoli cells	19.0769	.
chr1	20817164	20817665	Endothelial cells	9.17383	.
chr1	20820096	20820597	Stroma	444.162	.
chr1	20820915	20821416	Leydig cells	5.40974	.
chr1	20821575	20822076	Leydig cells	4.65004	.
chr1	20846028	20846529	Stroma	5.38611	.
chr1	20867466	20867967	Stroma	6.68915	.
chr1	20868019	20868520	Germ cells	12.6438	.
chr1	20868524	20869025	Germ cells	4.06964	.
chr1	20879283	20879784	Leydig cells	3.89776	.
chr1	20882961	20883462	Leydig cells	7.40486	.
chr1	20890306	20890807	Sertoli cells	239.635	.
chr1	20890839	20891340	Sertoli cells	99.1697	.
chr1	20891512	20892013	Stroma	1.11103	.
chr1	20908688	20909189	Sertoli cells	4.98128	.
chr1	20912511	20913012	Germ cells	32.141	.
chr1	20920939	20921440	Sertoli cells	8.11252	.
chr1	20922827	20923328	Sertoli cells	11.5526	.
chr1	20933408	20933909	Stroma	27.3991	.
chr1	20934522	20935023	Germ cells	23.6801	.
chr1	20935045	20935546	Sertoli cells	36.7982	.
chr1	20938991	20939492	Stroma	6.8453	.
chr1	20940163	20940664	Stroma	30.703	.
chr1	20950814	20951315	Germ cells	8.80634	.
chr1	20951321	20951822	Stroma	1199.57	.
chr1	20951822	20952323	Endothelial cells	1.81563	.
chr1	20997901	20998402	Stroma	35.3498	.
chr1	21008810	21009311	PTM	165.414	.
chr1	21010367	21010868	PTM	13.5505	.
chr1	21014411	21014912	PTM	57.2287	.
chr1	21040976	21041477	Stroma	13.5771	.
chr1	21041496	21041997	Stroma	6.10903	.
chr1	21052633	21053134	PTM	15.7617	.
chr1	21075832	21076333	Sertoli cells	37.8684	.
chr1	21077535	21078036	PTM	5.63752	.
chr1	21078631	21079132	Germ cells	38.0662	.
chr1	21079153	21079654	Stroma	900.896	.
chr1	21080349	21080850	Sertoli cells	5.68246	.
chr1	21089525	21090026	Stroma	15.4331	.
chr1	21096899	21097400	Stroma	35.3498	.
chr1	21097600	21098101	Stroma	11.4151	.
chr1	21100612	21101113	Leydig cells	4.91958	.
chr1	21101504	21102005	Sertoli cells	43.465	.
chr1	21124925	21125426	Stroma	7.49666	.
chr1	21154375	21154876	Germ cells	9.57638	.
chr1	21154906	21155407	Germ cells	4.22458	.
chr1	21161738	21162239	Stroma	10.7512	.
chr1	21162600	21163101	Germ cells	19.7183	.
chr1	21166194	21166695	Sertoli cells	179.935	.
chr1	21166786	21167287	Sertoli cells	7.03064	.
chr1	21191682	21192183	Germ cells	4.22458	.
chr1	21208937	21209438	Leydig cells	20.0535	.
chr1	21213499	21214000	Leydig cells	5.40974	.
chr1	21218540	21219041	Stroma	570.419	.
chr1	21219459	21219960	Sertoli cells	11.222	.
chr1	21232018	21232519	Stroma	14.2979	.
chr1	21239899	21240400	Leydig cells	11.9942	.
chr1	21252524	21253025	Sertoli cells	17.6792	.
chr1	21271398	21271899	Stroma	125.646	.
chr1	21272066	21272567	Stroma	102.472	.
chr1	21280213	21280714	Leydig cells	12.162	.
chr1	21284355	21284856	Leydig cells	11.9942	.
chr1	21296124	21296625	Sertoli cells	12.4615	.
chr1	21304810	21305311	Stroma	2.69892	.
chr1	21305430	21305931	Stroma	13.3864	.
chr1	21306083	21306584	Stroma	3.93237	.
chr1	21344279	21344780	Stroma	17.5839	.
chr1	21393496	21393997	Germ cells	8.36954	.
chr1	21402012	21402513	Sertoli cells	4.02142	.
chr1	21402801	21403302	Germ cells	8.36954	.
chr1	21411180	21411681	Stroma	36.4048	.
chr1	21440095	21440596	Germ cells	4.72579	.
chr1	21461039	21461540	Sertoli cells	31.8349	.
chr1	21499760	21500261	Sertoli cells	6.58042	.
chr1	21512286	21512787	Germ cells	5.54065	.
chr1	21512846	21513347	Germ cells	6.92519	.
chr1	21830097	21830598	Sertoli cells	5.98581	.
chr1	21890518	21891019	Sertoli cells	5.77528	.
chr1	21960356	21960857	Macrophages	10.0929	.
chr1	21961150	21961651	Stroma	161.814	.
chr1	21961712	21962213	Germ cells	14.2382	.
chr1	21962354	21962855	Sertoli cells	2.52566	.
chr1	21963034	21963535	Macrophages	4.06885	.
chr1	22030339	22030840	Germ cells	17.9933	.
chr1	22268909	22269410	Stroma	56.5729	.
chr1	22512345	22512846	Germ cells	20.9469	.
chr1	22533105	22533606	Germ cells	31.0187	.
chr1	22533642	22534143	Germ cells	15.3669	.
chr1	22538083	22538584	Germ cells	6.92519	.
chr1	22805031	22805532	Germ cells	9.86842	.
chr1	22805867	22806368	Stroma	163.427	.
chr1	22959454	22959955	Germ cells	6.70201	.
chr1	22971367	22971868	Stroma	4.6889	.
chr1	23049272	23049773	Germ cells	11.0884	.
chr1	23061958	23062459	Sertoli cells	16.3733	.
chr1	23100722	23101223	Germ cells	5.54065	.
chr1	23101983	23102484	Germ cells	13.0052	.
chr1	23115692	23116193	Germ cells	9.17847	.
chr1	23187900	23188401	PTM	4.1717	.
chr1	23202375	23202876	PTM	29.4007	.
chr1	23214434	23214935	Sertoli cells	8.11252	.
chr1	23255904	23256405	Sertoli cells	258.63	.
chr1	23256445	23256946	Stroma	251.19	.
chr1	23263720	23264221	Sertoli cells	19.1404	.
chr1	23271397	23271898	Sertoli cells	13.9872	.
chr1	23286688	23287189	PTM	12.0985	.
chr1	23321243	23321744	Germ cells	5.35242	.
chr1	23330651	23331152	Germ cells	13.0052	.
chr1	23355829	23356330	Germ cells	6.3579	.
chr1	23358622	23359123	Stroma	7.6265	.
chr1	23380063	23380564	Neutrophils	9.76963	.
chr1	23382590	23383091	Sertoli cells	28.9012	.
chr1	23383130	23383631	Sertoli cells	214.798	.
chr1	23392251	23392752	Germ cells	6.92519	.
chr1	23402810	23403311	Germ cells	5.35242	.
chr1	23425307	23425808	Germ cells	4.72579	.
chr1	23433613	23434114	Neutrophils	7.92928	.
chr1	23524671	23525172	Germ cells	3.78685	.
chr1	23536823	23537324	Germ cells	19.6732	.
chr1	23539549	23540050	Germ cells	8.36954	.
chr1	23542112	23542613	Germ cells	8.80634	.
chr1	23573802	23574303	Germ cells	2.98761	.
chr1	23583717	23584218	Germ cells	4.22458	.
chr1	23584285	23584786	Germ cells	8.36954	.
chr1	23656152	23656653	Germ cells	4.22458	.
chr1	23674305	23674806	Germ cells	6.92519	.
chr1	23705435	23705936	Germ cells	6.3579	.
chr1	23761071	23761572	Germ cells	6.3579	.
chr1	23761642	23762143	Germ cells	17.0045	.
chr1	23762707	23763208	Germ cells	60.1636	.
chr1	23763645	23764146	Germ cells	3.78685	.
chr1	23776448	23776949	Germ cells	5.54065	.
chr1	23785269	23785770	Germ cells	2.98761	.
chr1	23792700	23793201	Germ cells	42.6414	.
chr1	23793695	23794196	Germ cells	3.78685	.
chr1	23826320	23826821	Germ cells	13.7621	.
chr1	23827022	23827523	Germ cells	35.0774	.
chr1	23828952	23829453	Germ cells	14.6054	.
chr1	23843830	23844331	PTM	6.65346	.
chr1	23846220	23846721	PTM	33.1236	.
chr1	23920265	23920766	PTM	15.7617	.
chr1	23921625	23922126	Germ cells	11.0884	.
chr1	23922144	23922645	Stroma	392.243	.
chr1	23935038	23935539	Germ cells	15.8695	.
chr1	23947175	23947676	Germ cells	23.6801	.
chr1	23958790	23959291	Germ cells	10.664	.
chr1	23959325	23959826	Germ cells	5.54065	.
chr1	23968484	23968985	Germ cells	13.3939	.
chr1	24005406	24005907	Stroma	1134.78	.
chr1	24028714	24029215	Stroma	15.4881	.
chr1	24033937	24034438	Sertoli cells	4.55679	.
chr1	24075808	24076309	Germ cells	11.0884	.
chr1	24099267	24099768	Leydig cells	3.89776	.
chr1	24099969	24100470	Germ cells	30.5497	.
chr1	24100527	24101028	Germ cells	9.17847	.
chr1	24101060	24101561	Stroma	15.4331	.
chr1	24107569	24108070	Germ cells	12.2065	.
chr1	24133779	24134280	Germ cells	12.6438	.
chr1	24137092	24137593	Germ cells	6.70201	.
chr1	24153087	24153588	Germ cells	11.0884	.
chr1	24172637	24173138	Stroma	23.1443	.
chr1	24175918	24176419	Germ cells	8.11233	.
chr1	24176435	24176936	Germ cells	2.86594	.
chr1	24195746	24196247	Sertoli cells	8.2048	.
chr1	24226093	24226594	PTM	30.4244	.
chr1	24245926	24246427	Germ cells	13.7621	.
chr1	24263050	24263551	Germ cells	8.11233	.
chr1	24264455	24264956	Germ cells	6.92519	.
chr1	24288682	24289183	Germ cells	8.11233	.
chr1	24302618	24303119	Stroma	45.8538	.
chr1	24311435	24311936	Germ cells	4.22458	.
chr1	24312171	24312672	Germ cells	15.8401	.
chr1	24330371	24330872	Germ cells	9.86842	.
chr1	24337491	24337992	Germ cells	14.6343	.
chr1	24361366	24361867	Germ cells	3.78685	.
chr1	24367788	24368289	Stroma	12.6729	.
chr1	24376178	24376679	Germ cells	17.0045	.
chr1	24378396	24378897	Sertoli cells	12.757	.
chr1	24452109	24452610	PTM	11.0283	.
chr1	24550518	24551019	Sertoli cells	10.3757	.
chr1	24586299	24586800	Germ cells	25.04	.
chr1	24587144	24587645	Germ cells	38.0662	.
chr1	24594215	24594716	Germ cells	14.6054	.
chr1	24594880	24595381	Germ cells	12.6438	.
chr1	24602775	24603276	Germ cells	8.11233	.
chr1	24620348	24620849	Germ cells	14.6343	.
chr1	24633474	24633975	Germ cells	4.06964	.
chr1	24648149	24648650	Germ cells	14.6343	.
chr1	24661548	24662049	PTM	4.31614	.
chr1	24675127	24675628	Germ cells	4.06964	.
chr1	24677809	24678310	Stroma	7.6265	.
chr1	24678587	24679088	Germ cells	32.4243	.
chr1	24679330	24679831	Germ cells	8.11233	.
chr1	24699295	24699796	Germ cells	47.3187	.
chr1	24766629	24767130	Germ cells	6.92519	.
chr1	24783010	24783511	Germ cells	5.03701	.
chr1	24793242	24793743	Germ cells	3.78685	.
chr1	24793795	24794296	Germ cells	6.70201	.
chr1	24827054	24827555	Germ cells	5.54065	.
chr1	24859647	24860148	Germ cells	5.35242	.
chr1	24926410	24926911	Germ cells	5.54065	.
chr1	24939050	24939551	Germ cells	9.86842	.
chr1	25016152	25016653	PTM	9.98254	.
chr1	25017135	25017636	Sertoli cells	4.55679	.
chr1	25017840	25018341	Sertoli cells	11.9733	.
chr1	25060106	25060607	Stroma	5.28235	.
chr1	25063961	25064462	Germ cells	6.92519	.
chr1	25066515	25067016	Germ cells	9.57638	.
chr1	25105310	25105811	Stroma	51.4466	.
chr1	25107417	25107918	Stroma	15.4331	.
chr1	25146119	25146620	Sertoli cells	26.1498	.
chr1	25178303	25178804	Germ cells	11.0884	.
chr1	25179774	25180275	Germ cells	6.92519	.
chr1	25180476	25180977	Germ cells	2.98761	.
chr1	25223699	25224200	Germ cells	6.70201	.
chr1	25228524	25229025	Stroma	303.025	.
chr1	25317078	25317579	Sertoli cells	19.1404	.
chr1	25474133	25474634	Germ cells	5.35242	.
chr1	25508462	25508963	Germ cells	6.70201	.
chr1	25509132	25509633	Germ cells	8.36954	.
chr1	25510267	25510768	Stroma	6.73516	.
chr1	25602860	25603361	Germ cells	11.4149	.
chr1	25614713	25615214	Germ cells	4.22458	.
chr1	25615218	25615719	Germ cells	5.54065	.
chr1	25635737	25636238	Germ cells	9.86842	.
chr1	25738327	25738828	Germ cells	5.54065	.
chr1	25757680	25758181	Stroma	27.3991	.
chr1	25829285	25829786	Stroma	18.3286	.
chr1	25829902	25830403	Stroma	110.53	.
chr1	25830411	25830912	Germ cells	98.4572	.
chr1	25996782	25997283	Germ cells	5.54065	.
chr1	26024002	26024503	Germ cells	4.22458	.
chr1	26042637	26043138	Germ cells	7.74099	.
chr1	26065276	26065777	Germ cells	8.11233	.
chr1	26201753	26202254	Germ cells	12.6438	.
chr1	26202745	26203246	Germ cells	11.4149	.
chr1	26317058	26317559	Germ cells	2.98761	.
chr1	26333200	26333701	Germ cells	6.3579	.
chr1	26364155	26364656	Germ cells	9.91109	.
chr1	26406905	26407406	Germ cells	13.0052	.
chr1	26407567	26408068	Germ cells	4.22458	.
chr1	26425404	26425905	Germ cells	6.92519	.
chr1	26446672	26447173	Germ cells	6.92519	.
chr1	26504845	26505346	Germ cells	12.6438	.
chr1	26509824	26510325	Germ cells	9.17847	.
chr1	26524466	26524967	Germ cells	11.0884	.
chr1	26548209	26548710	Germ cells	11.0451	.
chr1	26591955	26592456	Germ cells	5.54065	.
chr1	26605136	26605637	Germ cells	8.11233	.
chr1	26616430	26616931	Germ cells	6.70201	.
chr1	26652050	26652551	Germ cells	3.78685	.
chr1	26842949	26843450	Germ cells	6.3579	.
chr1	26853785	26854286	Stroma	5.38611	.
chr1	26899599	26900100	Germ cells	6.70201	.
chr1	26900106	26900607	Germ cells	5.35242	.
chr1	27032306	27032807	Germ cells	14.6343	.
chr1	27109339	27109840	Germ cells	15.8695	.
chr1	27159022	27159523	Germ cells	5.54065	.
chr1	27159870	27160371	Germ cells	8.36954	.
chr1	27246443	27246944	Germ cells	5.35242	.
chr1	27248746	27249247	Germ cells	11.0884	.
chr1	27260359	27260860	Germ cells	4.22458	.
chr1	27260995	27261496	Sertoli cells	57.7846	.
chr1	27276335	27276836	Germ cells	9.86842	.
chr1	27307665	27308166	Germ cells	4.06964	.
chr1	27366885	27367386	Germ cells	4.22458	.
chr1	27442922	27443423	Germ cells	32.141	.
chr1	27447958	27448459	Germ cells	5.54065	.
chr1	27480692	27481193	Germ cells	5.03701	.
chr1	27489767	27490268	Germ cells	4.22458	.
chr1	27503570	27504071	Germ cells	11.4149	.
chr1	27712736	27713237	Germ cells	2.6191	.
chr1	27735017	27735518	Germ cells	3.78685	.
chr1	27735553	27736054	Germ cells	5.54065	.
chr1	27803663	27804164	Germ cells	3.80624	.
chr1	27900493	27900994	Germ cells	14.6343	.
chr1	27920348	27920849	Germ cells	6.70201	.
chr1	27979204	27979705	Germ cells	4.22458	.
chr1	28000997	28001498	Germ cells	4.06964	.
chr1	28007094	28007595	Germ cells	9.86842	.
chr1	28018228	28018729	Germ cells	9.86842	.
chr1	28033027	28033528	Germ cells	5.35242	.
chr1	28108946	28109447	Germ cells	1.84716	.
chr1	28109611	28110112	Germ cells	6.70201	.
chr1	28122086	28122587	Germ cells	14.2382	.
chr1	28134630	28135131	Germ cells	8.36954	.
chr1	28135219	28135720	Germ cells	4.22458	.
chr1	28144759	28145260	Stroma	9.12224	.
chr1	28175244	28175745	Germ cells	8.36954	.
chr1	28234097	28234598	Germ cells	11.4149	.
chr1	28328592	28329093	Germ cells	11.0451	.
chr1	28335016	28335517	Germ cells	5.03701	.
chr1	28339597	28340098	Germ cells	4.22458	.
chr1	28387949	28388450	Germ cells	4.06964	.
chr1	28406334	28406835	Germ cells	5.54065	.
chr1	28430945	28431446	Germ cells	5.54065	.
chr1	28493876	28494377	Germ cells	9.57638	.
chr1	28502158	28502659	Germ cells	6.3579	.
chr1	28538196	28538697	Germ cells	3.78685	.
chr1	28565031	28565532	Germ cells	6.92519	.
chr1	28573754	28574255	Germ cells	5.35242	.
chr1	28589186	28589687	Germ cells	4.06964	.
chr1	28589787	28590288	Germ cells	11.0884	.
chr1	28600308	28600809	Germ cells	11.4149	.
chr1	28622674	28623175	Germ cells	21.4691	.
chr1	28644980	28645481	Germ cells	5.54065	.
chr1	28707548	28708049	Germ cells	4.06964	.
chr1	28708453	28708954	Germ cells	8.36954	.
chr1	28709145	28709646	Germ cells	3.78685	.
chr1	28801010	28801511	Germ cells	9.57638	.
chr1	28801576	28802077	Germ cells	11.0451	.
chr1	28848149	28848650	Germ cells	5.35242	.
chr1	28858786	28859287	Germ cells	7.73277	.
chr1	28877670	28878171	Germ cells	2.98761	.
chr1	28955692	28956193	Germ cells	6.92519	.
chr1	28999600	29000101	Germ cells	4.22458	.
chr1	29067667	29068168	Stroma	5.99662	.
chr1	29082556	29083057	Germ cells	5.6892	.
chr1	29113183	29113684	Germ cells	4.22458	.
chr1	29137567	29138068	Germ cells	5.54065	.
chr1	29216986	29217487	Stroma	2.13128	.
chr1	29224080	29224581	Germ cells	4.22458	.
chr1	29237673	29238174	Germ cells	6.92519	.
chr1	29264908	29265409	Germ cells	11.0884	.
chr1	29321299	29321800	Germ cells	5.54065	.
chr1	29332706	29333207	Germ cells	6.92519	.
chr1	29368438	29368939	Germ cells	9.86842	.
chr1	29403646	29404147	Germ cells	4.22458	.
chr1	29445277	29445778	Sertoli cells	7.68819	.
chr1	29454028	29454529	Germ cells	19.7183	.
chr1	29484807	29485308	Germ cells	19.2265	.
chr1	29485337	29485838	Germ cells	9.86842	.
chr1	29507161	29507662	Germ cells	17.5333	.
chr1	29539024	29539525	Germ cells	6.70201	.
chr1	29545008	29545509	Germ cells	4.06964	.
chr1	29570911	29571412	Germ cells	8.80634	.
chr1	29586252	29586753	Germ cells	11.0884	.
chr1	29737051	29737552	Germ cells	14.2382	.
chr1	29774881	29775382	Germ cells	4.06964	.
chr1	29788628	29789129	Germ cells	6.92519	.
chr1	29863549	29864050	Germ cells	2.98761	.
chr1	29894941	29895442	Germ cells	12.6438	.
chr1	29929948	29930449	Germ cells	4.72579	.
chr1	29985700	29986201	Germ cells	5.03701	.
chr1	29996540	29997041	Germ cells	13.0052	.
chr1	30004320	30004821	Germ cells	3.78685	.
chr1	30085166	30085667	Germ cells	7.74099	.
chr1	30085743	30086244	Germ cells	5.6892	.
chr1	30118738	30119239	Germ cells	4.22458	.
chr1	30165412	30165913	Germ cells	5.6892	.
chr1	30233040	30233541	Germ cells	4.22458	.
chr1	30262322	30262823	Germ cells	19.7183	.
chr1	30274455	30274956	Germ cells	9.86842	.
chr1	30332999	30333500	Germ cells	3.78685	.
chr1	30408244	30408745	Germ cells	5.35242	.
chr1	30408890	30409391	Germ cells	2.98761	.
chr1	30480284	30480785	Germ cells	3.78685	.
chr1	30495439	30495940	Germ cells	12.2065	.
chr1	30515288	30515789	Germ cells	2.86594	.
chr1	30515796	30516297	Germ cells	9.91109	.
chr1	30540272	30540773	Germ cells	9.86842	.
chr1	30587534	30588035	Germ cells	4.22458	.
chr1	30588105	30588606	Germ cells	17.9933	.
chr1	30588870	30589371	Stroma	6.10903	.
chr1	30590842	30591343	PTM	16.6074	.
chr1	30595391	30595892	Stroma	11.6123	.
chr1	30637637	30638138	Sertoli cells	20.5735	.
chr1	30638859	30639360	Germ cells	2.98761	.
chr1	30667008	30667509	Germ cells	6.70201	.
chr1	30698546	30699047	Germ cells	11.4149	.
chr1	30718619	30719120	Stroma	6.85625	.
chr1	30720363	30720864	Germ cells	5.35242	.
chr1	30769755	30770256	Germ cells	6.70201	.
chr1	30770420	30770921	Germ cells	26.4382	.
chr1	30771056	30771557	Germ cells	4.22458	.
chr1	30771633	30772134	Germ cells	11.0884	.
chr1	30778351	30778852	Germ cells	8.36954	.
chr1	30787255	30787756	Germ cells	6.92519	.
chr1	30793067	30793568	PTM	3.41398	.
chr1	30793617	30794118	PTM	5.63752	.
chr1	30794508	30795009	Germ cells	6.92519	.
chr1	30803735	30804236	Germ cells	5.6892	.
chr1	30804570	30805071	Germ cells	11.4149	.
chr1	30847183	30847684	Germ cells	2.98761	.
chr1	30873180	30873681	Stroma	100.196	.
chr1	30873704	30874205	Stroma	703.587	.
chr1	30920760	30921261	Neutrophils	11.6681	.
chr1	30929343	30929844	Germ cells	5.54065	.
chr1	30937655	30938156	Germ cells	6.92519	.
chr1	30938224	30938725	PTM	3.95627	.
chr1	30938810	30939311	Stroma	9.23129	.
chr1	30940499	30941000	Stroma	9.23129	.
chr1	30945185	30945686	Stroma	5.28235	.
chr1	30948284	30948785	Sertoli cells	4.98128	.
chr1	30948853	30949354	Stroma	199.671	.
chr1	30949598	30950099	Stroma	2290.29	.
chr1	30950116	30950617	Macrophages	15.4842	.
chr1	30977145	30977646	Germ cells	6.92519	.
chr1	30998058	30998559	Germ cells	3.80624	.
chr1	31019295	31019796	Sertoli cells	12.1456	.
chr1	31038117	31038618	Germ cells	33.6024	.
chr1	31050224	31050725	Leydig cells	4.91958	.
chr1	31051435	31051936	Stroma	24.4778	.
chr1	31101014	31101515	PTM	4.31614	.
chr1	31102798	31103299	PTM	15.7617	.
chr1	31150555	31151056	Germ cells	41.1045	.
chr1	31153898	31154399	Stroma	14.4973	.
chr1	31164537	31165038	Germ cells	8.36954	.
chr1	31203295	31203796	Germ cells	6.92519	.
chr1	31204011	31204512	Germ cells	13.0052	.
chr1	31222449	31222950	Germ cells	118.742	.
chr1	31260450	31260951	PTM	29.6092	.
chr1	31317860	31318361	Germ cells	5.54065	.
chr1	31383774	31384275	Germ cells	16.2985	.
chr1	31416235	31416736	Germ cells	9.17847	.
chr1	31492273	31492774	Germ cells	9.57638	.
chr1	31572626	31573127	Germ cells	8.36954	.
chr1	31615920	31616421	Germ cells	10.664	.
chr1	31653004	31653505	Germ cells	4.22458	.
chr1	31681680	31682181	Germ cells	5.54065	.
chr1	31689469	31689970	Germ cells	4.06964	.
chr1	31764925	31765426	Germ cells	2.98761	.
chr1	31819921	31820422	Germ cells	6.92519	.
chr1	31937546	31938047	Germ cells	9.57638	.
chr1	32062608	32063109	Germ cells	3.80624	.
chr1	32172452	32172953	Germ cells	381.515	.
chr1	32220969	32221470	Germ cells	25.0509	.
chr1	32265609	32266110	Germ cells	9.57638	.
chr1	32269963	32270464	Germ cells	8.11233	.
chr1	32333959	32334460	Germ cells	5.54065	.
chr1	32436398	32436899	Germ cells	5.03701	.
chr1	32520810	32521311	Germ cells	8.36954	.
chr1	32546627	32547128	Germ cells	8.11233	.
chr1	32693181	32693682	Germ cells	5.54065	.
chr1	32701992	32702493	Germ cells	11.4149	.
chr1	32772368	32772869	Germ cells	13.3939	.
chr1	32876906	32877407	Sertoli cells	15.0213	.
chr1	32964947	32965448	Germ cells	9.57638	.
chr1	33036885	33037386	Germ cells	2.86594	.
chr1	33244642	33245143	Germ cells	9.91109	.
chr1	33271427	33271928	Germ cells	7.74099	.
chr1	33277007	33277508	Germ cells	8.80634	.
chr1	33333958	33334459	Leydig cells	6.23014	.
chr1	33362989	33363490	Sertoli cells	8.2048	.
chr1	33391567	33392068	Sertoli cells	14.9358	.
chr1	33470201	33470702	Sertoli cells	14.7328	.
chr1	33531125	33531626	Stroma	31.0419	.
chr1	33531830	33532331	Stroma	5.92496	.
chr1	33542170	33542671	Leydig cells	7.00357	.
chr1	33599176	33599677	Stroma	3.142	.
chr1	33621761	33622262	Germ cells	12.6438	.
chr1	33636184	33636685	Germ cells	8.36954	.
chr1	33637827	33638328	Germ cells	47.3187	.
chr1	33644603	33645104	Stroma	5.99662	.
chr1	33645603	33646104	Stroma	69.8451	.
chr1	33669556	33670057	Stroma	606.044	.
chr1	33670176	33670677	Stroma	467.589	.
chr1	33714787	33715288	Germ cells	17.097	.
chr1	33719633	33720134	Stroma	379.322	.
chr1	33720481	33720982	Stroma	9.08419	.
chr1	33732967	33733468	Stroma	4.01905	.
chr1	33738551	33739052	Neutrophils	3.08467	.
chr1	33739273	33739774	Stroma	49.7035	.
chr1	33742788	33743289	Sertoli cells	13.3383	.
chr1	33747182	33747683	Sertoli cells	30.3333	.
chr1	33747932	33748433	Sertoli cells	7.03064	.
chr1	33749065	33749566	Germ cells	5.54065	.
chr1	33756266	33756767	Stroma	8.28902	.
chr1	33756817	33757318	Stroma	20.328	.
chr1	33757495	33757996	Stroma	204.719	.
chr1	33758517	33759018	PTM	5.79407	.
chr1	33788187	33788688	Stroma	5.28235	.
chr1	33792433	33792934	Sertoli cells	13.3383	.
chr1	33813100	33813601	Neutrophils	6.46807	.
chr1	33813740	33814241	Stroma	199.671	.
chr1	33814303	33814804	Stroma	859.48	.
chr1	33826189	33826690	Germ cells	18.375	.
chr1	33826844	33827345	Germ cells	7.73277	.
chr1	33836215	33836716	Germ cells	5.03701	.
chr1	33837790	33838291	Germ cells	2.6191	.
chr1	33838299	33838800	Germ cells	5.54065	.
chr1	33838831	33839332	Germ cells	58.5904	.
chr1	33883406	33883907	Germ cells	12.1933	.
chr1	33892434	33892935	Germ cells	17.097	.
chr1	33906116	33906617	Stroma	6.8453	.
chr1	33906981	33907482	Stroma	19.3217	.
chr1	33907775	33908276	Stroma	330.414	.
chr1	33908396	33908897	PTM	8.45783	.
chr1	33932809	33933310	Stroma	5.92496	.
chr1	33944883	33945384	Germ cells	21.4691	.
chr1	33947537	33948038	Sertoli cells	4.63266	.
chr1	33964573	33965074	PTM	11.3543	.
chr1	33966302	33966803	Stroma	17.1237	.
chr1	34005088	34005589	Stroma	21.3471	.
chr1	34005640	34006141	PTM	113.232	.
chr1	34006260	34006761	Stroma	17.4567	.
chr1	34011284	34011785	Stroma	454.533	.
chr1	34011852	34012353	Germ cells	15.8695	.
chr1	34020183	34020684	PTM	42.6823	.
chr1	34028714	34029215	Macrophages	5.76491	.
chr1	34041108	34041609	Stroma	3.79298	.
chr1	34056104	34056605	Germ cells	11.0451	.
chr1	34060274	34060775	Stroma	112.023	.
chr1	34061094	34061595	Sertoli cells	19.1404	.
chr1	34068271	34068772	Germ cells	5.54065	.
chr1	34073677	34074178	Sertoli cells	11.222	.
chr1	34074650	34075151	Sertoli cells	6.85867	.
chr1	34076936	34077437	Sertoli cells	12.4615	.
chr1	34088979	34089480	Sertoli cells	33.6422	.
chr1	34096871	34097372	Sertoli cells	48.1032	.
chr1	34097555	34098056	Sertoli cells	36.3403	.
chr1	34103695	34104196	Sertoli cells	20.5735	.
chr1	34106781	34107282	Sertoli cells	8.11252	.
chr1	34110890	34111391	Sertoli cells	5.51291	.
chr1	34121214	34121715	Stroma	160.204	.
chr1	34121839	34122340	Stroma	21.0865	.
chr1	34127604	34128105	Sertoli cells	5.68246	.
chr1	34129624	34130125	Sertoli cells	5.77528	.
chr1	34132805	34133306	Sertoli cells	44.8139	.
chr1	34133745	34134246	Sertoli cells	10.3757	.
chr1	34139457	34139958	Stroma	15.4881	.
chr1	34140000	34140501	Stroma	9.08419	.
chr1	34143373	34143874	Stroma	5.99662	.
chr1	34150298	34150799	Sertoli cells	12.1456	.
chr1	34167611	34168112	Stroma	47.2149	.
chr1	34177891	34178392	Germ cells	75.4458	.
chr1	34189908	34190409	Sertoli cells	15.2418	.
chr1	34218256	34218757	Stroma	26.9858	.
chr1	34236306	34236807	Stroma	159.124	.
chr1	34237218	34237719	Stroma	52.7178	.
chr1	34237771	34238272	Stroma	15.4331	.
chr1	34263522	34264023	Leydig cells	3.89776	.
chr1	34268526	34269027	Stroma	19.3217	.
chr1	34269388	34269889	Stroma	9.23129	.
chr1	34288488	34288989	Stroma	3.30008	.
chr1	34289323	34289824	PTM	35.8713	.
chr1	34290364	34290865	PTM	50.2592	.
chr1	34293278	34293779	Leydig cells	7.59928	.
chr1	34298536	34299037	Stroma	24.1911	.
chr1	34312714	34313215	Leydig cells	7.40486	.
chr1	34326845	34327346	Stroma	56.9199	.
chr1	34328621	34329122	Sertoli cells	20.425	.
chr1	34367471	34367972	Germ cells	6.69264	.
chr1	34368404	34368905	Germ cells	5.54065	.
chr1	34378842	34379343	Germ cells	6.3579	.
chr1	34386600	34387101	Germ cells	5.35242	.
chr1	34388814	34389315	Macrophages	2.40458	.
chr1	34394092	34394593	Germ cells	9.86842	.
chr1	34409826	34410327	Stroma	26.3188	.
chr1	34432467	34432968	Stroma	12.6729	.
chr1	34433039	34433540	Stroma	148.522	.
chr1	34434079	34434580	Stroma	28.8117	.
chr1	34434674	34435175	Stroma	343.584	.
chr1	34438593	34439094	Neutrophils	3.08467	.
chr1	34439192	34439693	Stroma	2182.55	.
chr1	34439855	34440356	Stroma	509.075	.
chr1	34451083	34451584	Germ cells	11.0884	.
chr1	34458322	34458823	Germ cells	3.80624	.
chr1	34459494	34459995	Germ cells	41.2448	.
chr1	34460057	34460558	Germ cells	7.74099	.
chr1	34462723	34463224	Germ cells	13.0052	.
chr1	34464579	34465080	Neutrophils	6.15744	.
chr1	34471741	34472242	Germ cells	6.69264	.
chr1	34472445	34472946	Stroma	34.0812	.
chr1	34472970	34473471	Germ cells	26.2542	.
chr1	34485450	34485951	Germ cells	12.6438	.
chr1	34498188	34498689	Germ cells	15.8695	.
chr1	34498722	34499223	Germ cells	8.80634	.
chr1	34510432	34510933	Macrophages	6.75026	.
chr1	34511003	34511504	Germ cells	17.5333	.
chr1	34536522	34537023	PTM	9.39947	.
chr1	34537052	34537553	Germ cells	15.8695	.
chr1	34559653	34560154	Germ cells	1.84716	.
chr1	34560168	34560669	Germ cells	7.73277	.
chr1	34560757	34561258	Germ cells	8.11233	.
chr1	34578556	34579057	Germ cells	9.91109	.
chr1	34579419	34579920	Stroma	265.292	.
chr1	34586400	34586901	Germ cells	2.86594	.
chr1	34586955	34587456	Germ cells	6.92519	.
chr1	34587483	34587984	Germ cells	5.35242	.
chr1	34600106	34600607	Germ cells	5.35242	.
chr1	34602296	34602797	Leydig cells	20.0535	.
chr1	34633583	34634084	Germ cells	11.0451	.
chr1	34634906	34635407	Germ cells	5.03701	.
chr1	34635529	34636030	Germ cells	6.92519	.
chr1	34642386	34642887	Germ cells	12.6438	.
chr1	34664189	34664690	Stroma	5.19907	.
chr1	34665179	34665680	Sertoli cells	17.6036	.
chr1	34665996	34666497	Germ cells	8.11233	.
chr1	34674544	34675045	Stroma	7.71033	.
chr1	34676067	34676568	Stroma	7.71033	.
chr1	34677212	34677713	Stroma	11.6123	.
chr1	34677868	34678369	Stroma	88.12	.
chr1	34678524	34679025	Germ cells	15.8401	.
chr1	34699991	34700492	Sertoli cells	4.55679	.
chr1	34700613	34701114	Stroma	31.5762	.
chr1	34723627	34724128	Germ cells	33.6024	.
chr1	34724222	34724723	Germ cells	20.9906	.
chr1	34738316	34738817	Sertoli cells	53.7852	.
chr1	34739552	34740053	Sertoli cells	8.83297	.
chr1	34740360	34740861	Sertoli cells	13.3383	.
chr1	34740970	34741471	Sertoli cells	17.6792	.
chr1	34749392	34749893	Sertoli cells	34.8251	.
chr1	34750066	34750567	Germ cells	17.5333	.
chr1	34751200	34751701	Sertoli cells	24.6155	.
chr1	34766830	34767331	Sertoli cells	5.77528	.
chr1	34767691	34768192	Sertoli cells	14.7328	.
chr1	34768717	34769218	Sertoli cells	14.7328	.
chr1	34783770	34784271	Sertoli cells	12.757	.
chr1	34801469	34801970	Stroma	185.597	.
chr1	34802243	34802744	Macrophages	19.6228	.
chr1	34803337	34803838	Sertoli cells	19.0417	.
chr1	34805333	34805834	Germ cells	2.86594	.
chr1	34805957	34806458	Germ cells	29.2601	.
chr1	34806911	34807412	Germ cells	5.35242	.
chr1	34809700	34810201	Stroma	4.6889	.
chr1	34811013	34811514	Sertoli cells	8.2048	.
chr1	34811542	34812043	Germ cells	2.86594	.
chr1	34812596	34813097	PTM	9.71866	.
chr1	34841652	34842153	Stroma	8.28003	.
chr1	34842268	34842769	Stroma	25.5447	.
chr1	34842857	34843358	Stroma	417.1	.
chr1	34849709	34850210	Sertoli cells	127.085	.
chr1	34850342	34850843	Stroma	4.42206	.
chr1	34858565	34859066	Neutrophils	6.46807	.
chr1	34867112	34867613	Sertoli cells	39.9672	.
chr1	34891505	34892006	Stroma	77.4119	.
chr1	34893734	34894235	Stroma	3.30008	.
chr1	34928549	34929050	Germ cells	6.70201	.
chr1	34929335	34929836	Germ cells	2.6191	.
chr1	34929867	34930368	Germ cells	9.57638	.
chr1	34930478	34930979	Germ cells	58.5904	.
chr1	34961097	34961598	Germ cells	6.69264	.
chr1	34962200	34962701	Germ cells	5.6892	.
chr1	35077550	35078051	Germ cells	5.03701	.
chr1	35096969	35097470	Germ cells	3.78685	.
chr1	35206921	35207422	PTM	5.63752	.
chr1	35214243	35214744	Germ cells	14.2382	.
chr1	35215003	35215504	Germ cells	3.78685	.
chr1	35215971	35216472	Germ cells	9.57638	.
chr1	35257489	35257990	Stroma	23.4223	.
chr1	35353050	35353551	Germ cells	8.36954	.
chr1	35385287	35385788	Germ cells	14.6343	.
chr1	35388084	35388585	Germ cells	9.91109	.
chr1	35452397	35452898	Germ cells	12.2065	.
chr1	35453052	35453553	Germ cells	4.22458	.
chr1	35469097	35469598	Stroma	11.4151	.
chr1	35608449	35608950	Germ cells	5.35242	.
chr1	35650598	35651099	Germ cells	6.70201	.
chr1	35687232	35687733	Sertoli cells	14.7328	.
chr1	35687979	35688480	Germ cells	11.0884	.
chr1	35695212	35695713	Sertoli cells	4.98128	.
chr1	35726552	35727053	Sertoli cells	33.6825	.
chr1	35729796	35730297	Stroma	21.0865	.
chr1	35754078	35754579	Leydig cells	26.5219	.
chr1	35758717	35759218	Stroma	13.5771	.
chr1	35759317	35759818	Stroma	124.117	.
chr1	35763211	35763712	Germ cells	15.8695	.
chr1	35765595	35766096	Sertoli cells	5.98581	.
chr1	35766241	35766742	Sertoli cells	16.1551	.
chr1	35769070	35769571	Sertoli cells	7.03064	.
chr1	35769685	35770186	Sertoli cells	13.9872	.
chr1	35770503	35771004	Sertoli cells	17.8195	.
chr1	35773683	35774184	Stroma	11.6123	.
chr1	35822387	35822888	PTM	27.777	.
chr1	35824256	35824757	Germ cells	6.92519	.
chr1	35846484	35846985	Sertoli cells	11.5526	.
chr1	35850148	35850649	Germ cells	52.0911	.
chr1	35852486	35852987	Sertoli cells	17.6792	.
chr1	35853228	35853729	Sertoli cells	5.98581	.
chr1	35858204	35858705	Sertoli cells	5.68246	.
chr1	35864202	35864703	Sertoli cells	11.222	.
chr1	35866175	35866676	Stroma	27.9036	.
chr1	35869594	35870095	Germ cells	48.8991	.
chr1	35874905	35875406	Stroma	57.8715	.
chr1	35875791	35876292	Stroma	31.0419	.
chr1	35879563	35880064	Stroma	33.3119	.
chr1	35890565	35891066	PTM	56.8171	.
chr1	35905333	35905834	Sertoli cells	2.59994	.
chr1	35905854	35906355	Sertoli cells	39.9672	.
chr1	35913507	35914008	Stroma	12.6729	.
chr1	35925579	35926080	Sertoli cells	4.63266	.
chr1	35926153	35926654	PTM	214.691	.
chr1	35926656	35927157	PTM	114.901	.
chr1	35930315	35930816	PTM	6.65346	.
chr1	35933401	35933902	Stroma	14.5268	.
chr1	35935009	35935510	Stroma	89.3897	.
chr1	35935717	35936218	PTM	4.31614	.
chr1	35941691	35942192	PTM	25.8951	.
chr1	35951226	35951727	Sertoli cells	8.07976	.
chr1	35973284	35973785	PTM	15.443	.
chr1	35985272	35985773	Germ cells	23.6801	.
chr1	36006778	36007279	Stroma	5.38611	.
chr1	36010789	36011290	Germ cells	17.9933	.
chr1	36013694	36014195	Germ cells	7.73277	.
chr1	36015353	36015854	Sertoli cells	11.222	.
chr1	36017108	36017609	Sertoli cells	81.214	.
chr1	36030277	36030778	Stroma	388.443	.
chr1	36030931	36031432	Germ cells	8.80634	.
chr1	36052534	36053035	Macrophages	2.30469	.
chr1	36054627	36055128	Stroma	11.6123	.
chr1	36059924	36060425	Stroma	18.6726	.
chr1	36063315	36063816	Stroma	10.4548	.
chr1	36064219	36064720	Stroma	23.1786	.
chr1	36064800	36065301	Stroma	493.82	.
chr1	36065356	36065857	Stroma	35.3498	.
chr1	36066264	36066765	Leydig cells	5.40974	.
chr1	36068067	36068568	Stroma	762.795	.
chr1	36068715	36069216	Macrophages	10.0929	.
chr1	36069621	36070122	Stroma	19.3217	.
chr1	36070373	36070874	Stroma	47.6765	.
chr1	36071413	36071914	Stroma	21.0865	.
chr1	36072055	36072556	Stroma	2.52452	.
chr1	36072721	36073222	Stroma	8.28003	.
chr1	36073235	36073736	Stroma	92.2639	.
chr1	36074569	36075070	Stroma	8.41846	.
chr1	36075451	36075952	Leydig cells	7.40486	.
chr1	36076966	36077467	Sertoli cells	8.07976	.
chr1	36077960	36078461	Sertoli cells	5.98581	.
chr1	36079612	36080113	Sertoli cells	9.34144	.
chr1	36080911	36081412	PTM	91.989	.
chr1	36082075	36082576	Sertoli cells	8.83297	.
chr1	36082789	36083290	Stroma	4.59374	.
chr1	36083334	36083835	Sertoli cells	5.68246	.
chr1	36087483	36087984	Stroma	6.73516	.
chr1	36088144	36088645	Stroma	22.0305	.
chr1	36089392	36089893	Sertoli cells	19.0769	.
chr1	36090235	36090736	Sertoli cells	63.8191	.
chr1	36095347	36095848	Sertoli cells	16.5195	.
chr1	36095917	36096418	Sertoli cells	4.55679	.
chr1	36097889	36098390	Stroma	9.51641	.
chr1	36098561	36099062	Sertoli cells	6.85867	.
chr1	36099822	36100323	Sertoli cells	6.58042	.
chr1	36100918	36101419	Sertoli cells	16.5195	.
chr1	36103862	36104363	Germ cells	22.6929	.
chr1	36104395	36104896	Sertoli cells	10.3757	.
chr1	36105086	36105587	Sertoli cells	12.4615	.
chr1	36108611	36109112	Sertoli cells	3.11114	.
chr1	36109364	36109865	Sertoli cells	5.98581	.
chr1	36114734	36115235	Sertoli cells	4.02142	.
chr1	36118240	36118741	Leydig cells	17.3205	.
chr1	36125193	36125694	Stroma	8.41846	.
chr1	36128310	36128811	Germ cells	13.3939	.
chr1	36129067	36129568	Stroma	164.593	.
chr1	36130210	36130711	Sertoli cells	33.3231	.
chr1	36130990	36131491	Sertoli cells	6.96777	.
chr1	36131814	36132315	Sertoli cells	30.3607	.
chr1	36134553	36135054	Stroma	22.3787	.
chr1	36139452	36139953	Stroma	14.5268	.
chr1	36141378	36141879	Germ cells	2.6191	.
chr1	36142415	36142916	Sertoli cells	11.222	.
chr1	36148944	36149445	Macrophages	2.30469	.
chr1	36160141	36160642	Macrophages	11.8453	.
chr1	36162696	36163197	Macrophages	10.0929	.
chr1	36173388	36173889	Sertoli cells	11.5526	.
chr1	36179627	36180128	PTM	23.4846	.
chr1	36244066	36244567	Stroma	754.289	.
chr1	36251364	36251865	PTM	15.7617	.
chr1	36252779	36253280	Macrophages	8.39157	.
chr1	36254543	36255044	Germ cells	15.8695	.
chr1	36255186	36255687	Germ cells	12.2065	.
chr1	36255786	36256287	Germ cells	26.4382	.
chr1	36261998	36262499	Neutrophils	13.6179	.
chr1	36263962	36264463	Macrophages	5.32766	.
chr1	36264729	36265230	Macrophages	3.81356	.
chr1	36266309	36266810	Macrophages	2.30469	.
chr1	36268437	36268938	Germ cells	3.78685	.
chr1	36269352	36269853	Germ cells	15.8695	.
chr1	36270903	36271404	Macrophages	6.75026	.
chr1	36271606	36272107	Macrophages	8.59107	.
chr1	36272430	36272931	Macrophages	6.75026	.
chr1	36273310	36273811	Macrophages	31.3365	.
chr1	36274282	36274783	Macrophages	10.0929	.
chr1	36277207	36277708	Germ cells	15.3669	.
chr1	36279164	36279665	Stroma	34.0812	.
chr1	36281897	36282398	Germ cells	6.92519	.
chr1	36282436	36282937	Germ cells	4.22458	.
chr1	36291230	36291731	Germ cells	15.3669	.
chr1	36291752	36292253	Germ cells	1.84716	.
chr1	36293305	36293806	Macrophages	2.30469	.
chr1	36293901	36294402	Macrophages	1.07219	.
chr1	36296374	36296875	Macrophages	3.68764	.
chr1	36301521	36302022	Stroma	8.28902	.
chr1	36302103	36302604	Leydig cells	11.9942	.
chr1	36303242	36303743	Stroma	216.462	.
chr1	36304925	36305426	Stroma	9.90823	.
chr1	36307484	36307985	PTM	634.404	.
chr1	36308237	36308738	Macrophages	6.75026	.
chr1	36308939	36309440	Macrophages	3.81356	.
chr1	36309452	36309953	Macrophages	10.0929	.
chr1	36310019	36310520	Stroma	5.92496	.
chr1	36310758	36311259	Stroma	5.28235	.
chr1	36311747	36312248	Stroma	11.6123	.
chr1	36313327	36313828	PTM	4.96599	.
chr1	36314897	36315398	Germ cells	39.5794	.
chr1	36315410	36315911	Leydig cells	18.3809	.
chr1	36316281	36316782	Stroma	5.19907	.
chr1	36316825	36317326	Stroma	8.28902	.
chr1	36317785	36318286	Stroma	9.97609	.
chr1	36318286	36318787	Stroma	11.6123	.
chr1	36319047	36319548	Stroma	5.92496	.
chr1	36319686	36320187	Stroma	5.28235	.
chr1	36320584	36321085	Stroma	11.6123	.
chr1	36321541	36322042	Stroma	17.5839	.
chr1	36322114	36322615	PTM	7.00681	.
chr1	36323076	36323577	Leydig cells	32.3374	.
chr1	36323973	36324474	Stroma	70.5862	.
chr1	36324487	36324988	Innate lymph	2.37193	.
chr1	36325001	36325502	PTM	9.39947	.
chr1	36325611	36326112	PTM	17.7137	.
chr1	36326134	36326635	PTM	7.00681	.
chr1	36326679	36327180	PTM	8.45783	.
chr1	36327697	36328198	Stroma	11.4151	.
chr1	36333495	36333996	Stroma	4.59374	.
chr1	36352343	36352844	Sertoli cells	6.58042	.
chr1	36368058	36368559	Stroma	28.8117	.
chr1	36368933	36369434	Stroma	535.995	.
chr1	36370823	36371324	Sertoli cells	14.9358	.
chr1	36372022	36372523	Stroma	10.4548	.
chr1	36388625	36389126	Stroma	10.4548	.
chr1	36404518	36405019	Sertoli cells	23.2509	.
chr1	36408332	36408833	Germ cells	17.5333	.
chr1	36409068	36409569	Germ cells	6.70201	.
chr1	36410501	36411002	Macrophages	2.58586	.
chr1	36412826	36413327	Stroma	4.42206	.
chr1	36417054	36417555	Leydig cells	4.91958	.
chr1	36441019	36441520	Stroma	6.85625	.
chr1	36444480	36444981	Stroma	36.4048	.
chr1	36445056	36445557	Germ cells	35.4977	.
chr1	36446356	36446857	Neutrophils	6.15744	.
chr1	36464088	36464589	Germ cells	6.92519	.
chr1	36464607	36465108	Germ cells	26.4382	.
chr1	36467424	36467925	Germ cells	17.097	.
chr1	36469988	36470489	Stroma	97.5149	.
chr1	36470708	36471209	Stroma	22.1093	.
chr1	36471211	36471712	Stroma	187.388	.
chr1	36471779	36472280	Stroma	150.614	.
chr1	36472334	36472835	Stroma	9.90823	.
chr1	36473500	36474001	Stroma	24.3404	.
chr1	36474182	36474683	Stroma	5.18644	.
chr1	36474753	36475254	Stroma	17.3492	.
chr1	36475463	36475964	Stroma	22.1093	.
chr1	36476473	36476974	Stroma	14.2979	.
chr1	36478157	36478658	Sertoli cells	11.5526	.
chr1	36492367	36492868	Stroma	183.809	.
chr1	36496692	36497193	Sertoli cells	4.55679	.
chr1	36501247	36501748	PTM	57.8091	.
chr1	36511566	36512067	Stroma	1439.65	.
chr1	36512600	36513101	Stroma	72.572	.
chr1	36513691	36514192	Leydig cells	2.48797	.
chr1	36518221	36518722	Stroma	16.5114	.
chr1	36524777	36525278	Leydig cells	7.59928	.
chr1	36530588	36531089	Germ cells	8.11233	.
chr1	36531209	36531710	Germ cells	7.73277	.
chr1	36531807	36532308	Germ cells	6.70201	.
chr1	36534767	36535268	Stroma	23.1786	.
chr1	36536059	36536560	Leydig cells	7.00357	.
chr1	36539107	36539608	Sertoli cells	139.282	.
chr1	36540414	36540915	Sertoli cells	9.22839	.
chr1	36541816	36542317	Sertoli cells	8.11252	.
chr1	36543917	36544418	Sertoli cells	6.58042	.
chr1	36545390	36545891	Germ cells	20.9906	.
chr1	36546019	36546520	Leydig cells	3.89776	.
chr1	36547055	36547556	Germ cells	66.3289	.
chr1	36547610	36548111	Stroma	43.5388	.
chr1	36548165	36548666	PTM	109.908	.
chr1	36549166	36549667	Stroma	5.38611	.
chr1	36554496	36554997	Endothelial cells	15.3817	.
chr1	36555904	36556405	Stroma	101.659	.
chr1	36556501	36557002	PTM	445.407	.
chr1	36557026	36557527	Stroma	1041.27	.
chr1	36558018	36558519	Stroma	331.429	.
chr1	36558683	36559184	Sertoli cells	36.6062	.
chr1	36559210	36559711	Sertoli cells	34.8251	.
chr1	36560991	36561492	Stroma	5.92496	.
chr1	36562214	36562715	Leydig cells	7.59928	.
chr1	36562912	36563413	Leydig cells	13.9833	.
chr1	36563990	36564491	PTM	38.5028	.
chr1	36567708	36568209	Leydig cells	2.48797	.
chr1	36568586	36569087	PTM	94.9492	.
chr1	36569715	36570216	Stroma	37.5726	.
chr1	36570448	36570949	Stroma	23.1443	.
chr1	36571653	36572154	Macrophages	11.8453	.
chr1	36572574	36573075	PTM	31.7542	.
chr1	36573540	36574041	Stroma	32.9555	.
chr1	36574091	36574592	Stroma	35.2459	.
chr1	36580277	36580778	Stroma	237.05	.
chr1	36580876	36581377	Sertoli cells	20.425	.
chr1	36584372	36584873	Sertoli cells	10.0118	.
chr1	36587732	36588233	Stroma	6.10903	.
chr1	36588464	36588965	PTM	164.579	.
chr1	36589126	36589627	PTM	218.247	.
chr1	36589667	36590168	PTM	33.1236	.
chr1	36590274	36590775	PTM	39.8857	.
chr1	36595436	36595937	PTM	29.1374	.
chr1	36596040	36596541	Stroma	26.7033	.
chr1	36603300	36603801	Sertoli cells	57.093	.
chr1	36604460	36604961	Macrophages	2.30469	.
chr1	36608050	36608551	Sertoli cells	3.48776	.
chr1	36611514	36612015	Stroma	9.90823	.
chr1	36612193	36612694	Stroma	22.1093	.
chr1	36613397	36613898	Stroma	56.9199	.
chr1	36615161	36615662	Stroma	49.9425	.
chr1	36628591	36629092	Stroma	13.3973	.
chr1	36630466	36630967	PTM	12.3651	.
chr1	36631188	36631689	Stroma	3.67879	.
chr1	36634883	36635384	Stroma	225.15	.
chr1	36635631	36636132	Stroma	3.67879	.
chr1	36636426	36636927	Sertoli cells	107.326	.
chr1	36644391	36644892	Leydig cells	7.59928	.
chr1	36682284	36682785	Germ cells	8.80634	.
chr1	36682910	36683411	Germ cells	137.738	.
chr1	36684033	36684534	PTM	174.654	.
chr1	36691222	36691723	Stroma	1469.8	.
chr1	36691739	36692240	Stroma	61.2486	.
chr1	36696617	36697118	Stroma	9.90823	.
chr1	36698553	36699054	Germ cells	2.86594	.
chr1	36708079	36708580	Stroma	8.28902	.
chr1	36708619	36709120	Stroma	18.0943	.
chr1	36709161	36709662	Stroma	178.082	.
chr1	36709744	36710245	Germ cells	54.1072	.
chr1	36723313	36723814	Macrophages	3.68764	.
chr1	36744566	36745067	Stroma	103.127	.
chr1	36745104	36745605	PTM	3.95627	.
chr1	36745633	36746134	Sertoli cells	4.02142	.
chr1	36746411	36746912	Germ cells	53.7018	.
chr1	36753766	36754267	PTM	7.45367	.
chr1	36754364	36754865	PTM	127.665	.
chr1	36759044	36759545	Germ cells	19.7183	.
chr1	36760291	36760792	Macrophages	3.81356	.
chr1	36761372	36761873	Macrophages	5.17738	.
chr1	36766764	36767265	Macrophages	5.17738	.
chr1	36767520	36768021	Macrophages	2.30469	.
chr1	36770937	36771438	Germ cells	47.1288	.
chr1	36771604	36772105	Germ cells	11.0451	.
chr1	36772128	36772629	Germ cells	8.11233	.
chr1	36778888	36779389	Germ cells	3.80624	.
chr1	36784781	36785282	Stroma	165.095	.
chr1	36785319	36785820	Stroma	52.4805	.
chr1	36785906	36786407	PTM	3.4954	.
chr1	36786449	36786950	Germ cells	13.0052	.
chr1	36790712	36791213	Leydig cells	6.09225	.
chr1	36797369	36797870	Macrophages	3.81356	.
chr1	36831058	36831559	Stroma	4.6889	.
chr1	36860275	36860776	Stroma	4.42206	.
chr1	36861497	36861998	Stroma	11.6123	.
chr1	36874781	36875282	Macrophages	9.06381	.
chr1	36893136	36893637	Leydig cells	2.48797	.
chr1	36903317	36903818	Stroma	7.71033	.
chr1	36903993	36904494	Stroma	4.01905	.
chr1	36920043	36920544	PTM	132.946	.
chr1	36920683	36921184	PTM	35.7696	.
chr1	36923456	36923957	Leydig cells	2.51472	.
chr1	36938830	36939331	Leydig cells	13.9833	.
chr1	36939675	36940176	Stroma	2011.24	.
chr1	36940181	36940682	Macrophages	2.40458	.
chr1	36947763	36948264	Macrophages	2.30469	.
chr1	36949507	36950008	Leydig cells	4.91958	.
chr1	36960783	36961284	Macrophages	5.6563	.
chr1	36962285	36962786	Macrophages	7.32573	.
chr1	36970266	36970767	Sertoli cells	8.07976	.
chr1	36988568	36989069	Stroma	13.5771	.
chr1	36996459	36996960	Stroma	28.8117	.
chr1	37000309	37000810	Macrophages	2.30469	.
chr1	37009797	37010298	PTM	4.96599	.
chr1	37028625	37029126	Vascular mural cells	3.00727	.
chr1	37029150	37029651	Stroma	1638.69	.
chr1	37029802	37030303	Stroma	39.8538	.
chr1	37030447	37030948	Sertoli cells	5.68246	.
chr1	37043931	37044432	Germ cells	5.03701	.
chr1	37049176	37049677	PTM	48.2639	.
chr1	37061291	37061792	Stroma	8.28902	.
chr1	37062958	37063459	Stroma	5.28235	.
chr1	37063644	37064145	Stroma	78.8148	.
chr1	37064289	37064790	Stroma	11.6123	.
chr1	37075695	37076196	Germ cells	11.4149	.
chr1	37078098	37078599	Germ cells	23.6801	.
chr1	37081603	37082104	Sertoli cells	11.9733	.
chr1	37097424	37097925	Stroma	11.6123	.
chr1	37104894	37105395	Stroma	20.0762	.
chr1	37135308	37135809	PTM	6.65346	.
chr1	37177837	37178338	Stroma	15.4556	.
chr1	37186911	37187412	Germ cells	20.9906	.
chr1	37197420	37197921	Germ cells	4.22458	.
chr1	37212800	37213301	Germ cells	5.03701	.
chr1	37218319	37218820	Stroma	217.828	.
chr1	37234764	37235265	Germ cells	9.86842	.
chr1	37235325	37235826	Germ cells	2.98761	.
chr1	37239017	37239518	PTM	5.63752	.
chr1	37246418	37246919	Germ cells	9.17847	.
chr1	37248399	37248900	Stroma	4.47515	.
chr1	37250596	37251097	Stroma	23.697	.
chr1	37260606	37261107	Germ cells	4.06964	.
chr1	37261504	37262005	Germ cells	9.86842	.
chr1	37272417	37272918	Stroma	30.703	.
chr1	37288070	37288571	Germ cells	6.70201	.
chr1	37300014	37300515	Stroma	261.753	.
chr1	37300518	37301019	Macrophages	3.81356	.
chr1	37307648	37308149	Macrophages	4.06885	.
chr1	37314435	37314936	Leydig cells	2.48797	.
chr1	37317623	37318124	Macrophages	10.8606	.
chr1	37321002	37321503	Stroma	6.73516	.
chr1	37327296	37327797	Macrophages	7.32573	.
chr1	37332063	37332564	Stroma	5.28235	.
chr1	37332757	37333258	Stroma	28.4901	.
chr1	37341966	37342467	Stroma	9.08419	.
chr1	37344111	37344612	Neutrophils	7.92928	.
chr1	37347408	37347909	Sertoli cells	6.96777	.
chr1	37348775	37349276	PTM	5.79407	.
chr1	37350887	37351388	Sertoli cells	11.5526	.
chr1	37355494	37355995	Stroma	7.49666	.
chr1	37368879	37369380	PTM	69.4575	.
chr1	37398924	37399425	Stroma	61.8066	.
chr1	37399614	37400115	Stroma	5.99662	.
chr1	37401612	37402113	Stroma	11.7425	.
chr1	37419360	37419861	Stroma	52.2212	.
chr1	37428919	37429420	Sertoli cells	13.9872	.
chr1	37429863	37430364	Stroma	1180.25	.
chr1	37430374	37430875	Sertoli cells	86.5779	.
chr1	37473996	37474497	Neutrophils	14.2212	.
chr1	37474881	37475382	Neutrophils	2.88217	.
chr1	37478810	37479311	Macrophages	2.30469	.
chr1	37486406	37486907	Macrophages	3.81356	.
chr1	37491676	37492177	Macrophages	23.5905	.
chr1	37492670	37493171	Macrophages	2.30469	.
chr1	37494364	37494865	Germ cells	7.73277	.
chr1	37504301	37504802	PTM	6.66749	.
chr1	37504959	37505460	PTM	32.1467	.
chr1	37509347	37509848	Sertoli cells	9.34144	.
chr1	37510094	37510595	Germ cells	25.0509	.
chr1	37512081	37512582	PTM	23.4846	.
chr1	37512582	37513083	PTM	4.77864	.
chr1	37526958	37527459	Sertoli cells	6.85867	.
chr1	37540330	37540831	PTM	3.41398	.
chr1	37540884	37541385	Stroma	709.375	.
chr1	37551989	37552490	Stroma	11.7856	.
chr1	37579335	37579836	Germ cells	19.6732	.
chr1	37586040	37586541	Macrophages	6.75026	.
chr1	37606767	37607268	Germ cells	6.70201	.
chr1	37614067	37614568	Germ cells	15.8695	.
chr1	37623246	37623747	Germ cells	2.6191	.
chr1	37623890	37624391	Germ cells	12.1933	.
chr1	37624479	37624980	Germ cells	2.6191	.
chr1	37639083	37639584	Stroma	112.023	.
chr1	37644123	37644624	Sertoli cells	12.4615	.
chr1	37678338	37678839	Leydig cells	12.162	.
chr1	37687094	37687595	Sertoli cells	10.6402	.
chr1	37687595	37688096	Sertoli cells	34.9269	.
chr1	37688291	37688792	Sertoli cells	35.2335	.
chr1	37691162	37691663	Germ cells	29.2601	.
chr1	37694515	37695016	Sertoli cells	53.1184	.
chr1	37696909	37697410	Sertoli cells	6.58042	.
chr1	37709968	37710469	Leydig cells	3.67689	.
chr1	37717429	37717930	Germ cells	25.0509	.
chr1	37719258	37719759	Germ cells	9.86842	.
chr1	37719767	37720268	Germ cells	17.5333	.
chr1	37728049	37728550	PTM	12.4756	.
chr1	37736976	37737477	Germ cells	22.6929	.
chr1	37864875	37865376	Sertoli cells	759.394	.
chr1	37865582	37866083	Sertoli cells	4.63266	.
chr1	37871957	37872458	Stroma	386.925	.
chr1	37872597	37873098	Sertoli cells	9.22839	.
chr1	37875159	37875660	Germ cells	20.9906	.
chr1	37889577	37890078	Stroma	8.28003	.
chr1	37890136	37890637	Sertoli cells	385.802	.
chr1	37903112	37903613	Sertoli cells	16.1551	.
chr1	37909930	37910431	Germ cells	9.86842	.
chr1	37917653	37918154	Sertoli cells	47.4669	.
chr1	37931691	37932192	Sertoli cells	10.0118	.
chr1	37946887	37947388	Germ cells	14.6054	.
chr1	37956748	37957249	Sertoli cells	10.3757	.
chr1	37959461	37959962	Leydig cells	3.89776	.
chr1	37965533	37966034	Germ cells	6.92519	.
chr1	37985778	37986279	Germ cells	12.6438	.
chr1	37986306	37986807	Germ cells	2.6191	.
chr1	37996996	37997497	Macrophages	120.03	.
chr1	37997796	37998297	Endothelial cells	55.6039	.
chr1	37998308	37998809	Sertoli cells	43.1863	.
chr1	38103735	38104236	Sertoli cells	23.2509	.
chr1	38110833	38111334	Sertoli cells	12.757	.
chr1	38128996	38129497	Stroma	77.4297	.
chr1	38129846	38130347	Leydig cells	127.132	.
chr1	38131097	38131598	Germ cells	26.4382	.
chr1	38153825	38154326	Sertoli cells	7.68819	.
chr1	38166605	38167106	Stroma	7.6265	.
chr1	38169228	38169729	Stroma	9.90823	.
chr1	38171600	38172101	Stroma	13.3973	.
chr1	38172508	38173009	PTM	7.65393	.
chr1	38183086	38183587	Stroma	2.30593	.
chr1	38185453	38185954	Stroma	78.0931	.
chr1	38195109	38195610	Stroma	5.38611	.
chr1	38199819	38200320	Stroma	4.59374	.
chr1	38202754	38203255	Stroma	27.3991	.
chr1	38207307	38207808	Stroma	6.8453	.
chr1	38209658	38210159	Germ cells	18.375	.
chr1	38214256	38214757	Stroma	5.99662	.
chr1	38218091	38218592	Germ cells	89.4742	.
chr1	38239474	38239975	Germ cells	124.389	.
chr1	38241152	38241653	Stroma	31.0419	.
chr1	38241816	38242317	Leydig cells	17.7459	.
chr1	38242437	38242938	Stroma	6.73516	.
chr1	38243337	38243838	Stroma	5.18644	.
chr1	38248063	38248564	Stroma	17.3492	.
chr1	38250043	38250544	Stroma	6.73516	.
chr1	38251911	38252412	Stroma	4.6889	.
chr1	38259484	38259985	Stroma	5.28235	.
chr1	38260757	38261258	Stroma	5.28235	.
chr1	38263220	38263721	PTM	3.17398	.
chr1	38281450	38281951	Stroma	4.42206	.
chr1	38288692	38289193	Stroma	7.71033	.
chr1	38303725	38304226	Stroma	4.59374	.
chr1	38304372	38304873	Stroma	2.19337	.
chr1	38305660	38306161	Stroma	5.99662	.
chr1	38308067	38308568	Sertoli cells	17.6036	.
chr1	38315267	38315768	Germ cells	17.097	.
chr1	38334277	38334778	Stroma	10.4548	.
chr1	38358247	38358748	Vascular mural cells	2.50259	.
chr1	38359052	38359553	Germ cells	28.6939	.
chr1	38362269	38362770	Stroma	6.10903	.
chr1	38364707	38365208	Stroma	8.41846	.
chr1	38368323	38368824	Stroma	34.4612	.
chr1	38368941	38369442	Stroma	6.85625	.
chr1	38377585	38378086	Stroma	7.47757	.
chr1	38378270	38378771	Stroma	6.68915	.
chr1	38378856	38379357	Stroma	5.28235	.
chr1	38381571	38382072	Stroma	3.37842	.
chr1	38384328	38384829	PTM	21.1304	.
chr1	38387489	38387990	Stroma	7.6265	.
chr1	38388649	38389150	PTM	5.71492	.
chr1	38389469	38389970	Stroma	15.225	.
chr1	38390384	38390885	Stroma	102.472	.
chr1	38391363	38391864	Stroma	4.59374	.
chr1	38391961	38392462	Stroma	25.878	.
chr1	38393491	38393992	Stroma	29.9217	.
chr1	38394455	38394956	Stroma	16.3839	.
chr1	38395490	38395991	Stroma	4.01905	.
chr1	38398404	38398905	Stroma	16.1671	.
chr1	38399102	38399603	Stroma	8.28003	.
chr1	38401775	38402276	PTM	4.96599	.
chr1	38403504	38404005	PTM	13.3966	.
chr1	38407005	38407506	Stroma	3.67879	.
chr1	38410485	38410986	Germ cells	14.6054	.
chr1	38411027	38411528	Stroma	6.73516	.
chr1	38418654	38419155	Stroma	5.18644	.
chr1	38428624	38429125	Stroma	14.4973	.
chr1	38429328	38429829	Stroma	23.4223	.
chr1	38430270	38430771	Germ cells	133.899	.
chr1	38437645	38438146	Stroma	22.1093	.
chr1	38438579	38439080	Stroma	3.37842	.
chr1	38440140	38440641	Stroma	42.7557	.
chr1	38447291	38447792	PTM	5.17713	.
chr1	38448763	38449264	Stroma	4.6889	.
chr1	38450746	38451247	PTM	4.31614	.
chr1	38456680	38457181	PTM	10.3653	.
chr1	38469068	38469569	PTM	4.31614	.
chr1	38470086	38470587	Stroma	17.4567	.
chr1	38470718	38471219	Stroma	6.10903	.
chr1	38475452	38475953	Stroma	8.28003	.
chr1	38476059	38476560	Stroma	16.1671	.
chr1	38478113	38478614	Stroma	65.54	.
chr1	38478694	38479195	PTM	6.65346	.
chr1	38480126	38480627	PTM	14.307	.
chr1	38481487	38481988	PTM	18.8365	.
chr1	38482303	38482804	Stroma	3.37842	.
chr1	38483222	38483723	Stroma	7.49666	.
chr1	38487538	38488039	Stroma	9.08419	.
chr1	38488752	38489253	Stroma	5.99662	.
chr1	38497590	38498091	PTM	12.4756	.
chr1	38499382	38499883	Stroma	5.28235	.
chr1	38501328	38501829	Stroma	5.99662	.
chr1	38502825	38503326	Stroma	3.93237	.
chr1	38503569	38504070	Stroma	13.3864	.
chr1	38505547	38506048	Stroma	20.5174	.
chr1	38506171	38506672	Stroma	5.38611	.
chr1	38506722	38507223	Stroma	3.37842	.
chr1	38512196	38512697	PTM	9.98254	.
chr1	38514087	38514588	Stroma	13.5771	.
chr1	38521175	38521676	Stroma	2.69892	.
chr1	38525025	38525526	Stroma	4.6889	.
chr1	38526536	38527037	PTM	8.4064	.
chr1	38528127	38528628	Germ cells	2.6191	.
chr1	38534772	38535273	Stroma	5.99662	.
chr1	38538482	38538983	Stroma	2.13128	.
chr1	38539018	38539519	Stroma	4.59374	.
chr1	38541451	38541952	Stroma	10.9157	.
chr1	38542514	38543015	Stroma	17.5839	.
chr1	38545648	38546149	Stroma	25.5153	.
chr1	38546756	38547257	Stroma	12.491	.
chr1	38547577	38548078	Stroma	8.28003	.
chr1	38553075	38553576	PTM	4.96599	.
chr1	38560650	38561151	Stroma	17.5839	.
chr1	38561414	38561915	Stroma	5.28235	.
chr1	38562729	38563230	PTM	22.8276	.
chr1	38565178	38565679	Stroma	8.60114	.
chr1	38566164	38566665	Stroma	4.59374	.
chr1	38582205	38582706	Stroma	3.30008	.
chr1	38586291	38586792	Stroma	3.93237	.
chr1	38602017	38602518	Stroma	9.51641	.
chr1	38606784	38607285	Stroma	8.41846	.
chr1	38607481	38607982	Stroma	7.49666	.
chr1	38611444	38611945	Stroma	5.99662	.
chr1	38614101	38614602	Stroma	10.7512	.
chr1	38616121	38616622	Stroma	5.28235	.
chr1	38618975	38619476	Stroma	5.99662	.
chr1	38620764	38621265	Germ cells	22.3264	.
chr1	38623236	38623737	PTM	7.45367	.
chr1	38626401	38626902	Stroma	72.572	.
chr1	38627303	38627804	Stroma	107.556	.
chr1	38627813	38628314	Stroma	237.05	.
chr1	38628407	38628908	Stroma	82.2907	.
chr1	38629140	38629641	PTM	345.149	.
chr1	38631444	38631945	Stroma	19.0786	.
chr1	38636903	38637404	Stroma	4.59374	.
chr1	38651809	38652310	Sertoli cells	4.55679	.
chr1	38658138	38658639	PTM	7.45367	.
chr1	38664797	38665298	Macrophages	5.6563	.
chr1	38665520	38666021	PTM	3.4954	.
chr1	38666387	38666888	PTM	122.659	.
chr1	38668027	38668528	PTM	25.3097	.
chr1	38679810	38680311	Stroma	29.2348	.
chr1	38680748	38681249	Stroma	9.08419	.
chr1	38688784	38689285	Stroma	18.3286	.
chr1	38694002	38694503	Macrophages	8.59107	.
chr1	38695964	38696465	PTM	13.3966	.
chr1	38716535	38717036	PTM	4.96599	.
chr1	38720189	38720690	Germ cells	11.0884	.
chr1	38722384	38722885	Germ cells	3.78685	.
chr1	38722904	38723405	Germ cells	3.80624	.
chr1	38730341	38730842	Stroma	7.71033	.
chr1	38735403	38735904	Stroma	104.599	.
chr1	38740688	38741189	Stroma	12.491	.
chr1	38743720	38744221	Stroma	24.4778	.
chr1	38756034	38756535	Germ cells	6.70201	.
chr1	38757937	38758438	PTM	105.183	.
chr1	38760335	38760836	PTM	14.4481	.
chr1	38761115	38761616	PTM	8.45783	.
chr1	38764884	38765385	Stroma	30.703	.
chr1	38766409	38766910	Stroma	59.1767	.
chr1	38766914	38767415	Stroma	301.204	.
chr1	38767785	38768286	Stroma	237.05	.
chr1	38768394	38768895	PTM	4.96599	.
chr1	38769834	38770335	Germ cells	13.7621	.
chr1	38777469	38777970	Macrophages	6.75026	.
chr1	38782792	38783293	Stroma	4.42206	.
chr1	38786249	38786750	Stroma	21.0865	.
chr1	38787385	38787886	Stroma	59.9393	.
chr1	38789800	38790301	PTM	18.8365	.
chr1	38816649	38817150	Stroma	5.28235	.
chr1	38835605	38836106	Sertoli cells	8.11252	.
chr1	38836225	38836726	Germ cells	16.2985	.
chr1	38843226	38843727	Stroma	13.5771	.
chr1	38847995	38848496	Stroma	3.79298	.
chr1	38856132	38856633	Germ cells	9.86842	.
chr1	38873898	38874399	Sertoli cells	19.0417	.
chr1	38883567	38884068	Stroma	9.90823	.
chr1	38896982	38897483	Germ cells	12.6438	.
chr1	38897715	38898216	Stroma	194.646	.
chr1	38908214	38908715	Germ cells	9.57638	.
chr1	38918797	38919298	Germ cells	6.69264	.
chr1	38936684	38937185	Germ cells	9.57638	.
chr1	38939535	38940036	Stroma	19.3217	.
chr1	38945836	38946337	Germ cells	5.6892	.
chr1	38986859	38987360	Germ cells	12.2065	.
chr1	38987406	38987907	Sertoli cells	388.158	.
chr1	38988130	38988631	Stroma	84.4077	.
chr1	39001080	39001581	Stroma	22.3787	.
chr1	39007380	39007881	PTM	10.3923	.
chr1	39010642	39011143	Stroma	65.2142	.
chr1	39015632	39016133	Germ cells	6.92519	.
chr1	39029891	39030392	Sertoli cells	4.55679	.
chr1	39045403	39045904	Germ cells	6.70201	.
chr1	39046239	39046740	Stroma	25.2494	.
chr1	39064002	39064503	PTM	16.8962	.
chr1	39069591	39070092	PTM	28.3586	.
chr1	39078927	39079428	Stroma	1.60009	.
chr1	39086168	39086669	Stroma	3.67879	.
chr1	39089746	39090247	Macrophages	2.30469	.
chr1	39104121	39104622	PTM	22.8276	.
chr1	39105482	39105983	PTM	38.5028	.
chr1	39135132	39135633	Germ cells	6.70201	.
chr1	39177339	39177840	Germ cells	8.11233	.
chr1	39178703	39179204	Germ cells	9.91109	.
chr1	39192269	39192770	Germ cells	39.5794	.
chr1	39192810	39193311	PTM	108.254	.
chr1	39193895	39194396	Leydig cells	24.6283	.
chr1	39194431	39194932	Vascular mural cells	5.47254	.
chr1	39196736	39197237	Stroma	26.3188	.
chr1	39205774	39206275	Leydig cells	5.40974	.
chr1	39206848	39207349	Leydig cells	10.3878	.
chr1	39234869	39235370	Leydig cells	2.48797	.
chr1	39253771	39254272	Leydig cells	4.65004	.
chr1	39255030	39255531	Leydig cells	3.67689	.
chr1	39256397	39256898	Stroma	21.3471	.
chr1	39257061	39257562	Stroma	7.49666	.
chr1	39281442	39281943	PTM	49.8441	.
chr1	39284737	39285238	Leydig cells	13.9833	.
chr1	39313989	39314490	Sertoli cells	4.63266	.
chr1	39317747	39318248	PTM	9.38654	.
chr1	39321762	39322263	PTM	6.0749	.
chr1	39325764	39326265	Sertoli cells	17.8195	.
chr1	39326404	39326905	Stroma	10.4548	.
chr1	39330828	39331329	Sertoli cells	13.5259	.
chr1	39331478	39331979	Sertoli cells	3.54652	.
chr1	39335752	39336253	Sertoli cells	24.6916	.
chr1	39336507	39337008	PTM	9.39947	.
chr1	39340579	39341080	Sertoli cells	8.11252	.
chr1	39341745	39342246	PTM	10.3923	.
chr1	39344914	39345415	Stroma	16.1671	.
chr1	39348192	39348693	Leydig cells	3.67689	.
chr1	39348768	39349269	Leydig cells	16.7365	.
chr1	39361854	39362355	Germ cells	9.86842	.
chr1	39362397	39362898	Germ cells	3.78685	.
chr1	39363640	39364141	PTM	6.65346	.
chr1	39366861	39367362	Stroma	16.3839	.
chr1	39367533	39368034	PTM	941.935	.
chr1	39368047	39368548	Stroma	103.127	.
chr1	39368626	39369127	Stroma	11.4151	.
chr1	39376821	39377322	PTM	2.71904	.
chr1	39381109	39381610	PTM	167.255	.
chr1	39392122	39392623	Stroma	74.6756	.
chr1	39393999	39394500	PTM	206.712	.
chr1	39398107	39398608	Sertoli cells	17.8195	.
chr1	39399205	39399706	Sertoli cells	32.1458	.
chr1	39404082	39404583	Germ cells	53.7018	.
chr1	39407015	39407516	Stroma	20.8965	.
chr1	39408081	39408582	Sertoli cells	10.0118	.
chr1	39417797	39418298	PTM	271.427	.
chr1	39440237	39440738	PTM	18.0489	.
chr1	39443745	39444246	Stroma	10.7512	.
chr1	39449363	39449864	Leydig cells	3.89776	.
chr1	39450333	39450834	Sertoli cells	4.02142	.
chr1	39450974	39451475	Sertoli cells	34.8251	.
chr1	39452410	39452911	Sertoli cells	28.9012	.
chr1	39453300	39453801	Sertoli cells	4.02142	.
chr1	39455167	39455668	Sertoli cells	12.757	.
chr1	39456213	39456714	Sertoli cells	12.4615	.
chr1	39462938	39463439	Germ cells	4.06964	.
[truncated: 220,919 more rows]
