# Supplementary material for: The single-cell chromatin accessibility landscape in mouse perinatal testis development
Source: eLife journal article supplement (doi:10.7554/elife.75624), 2023-04-25
Supplement: supp [file elife-75624-supp-v1.zip › elife_poa_e75624_Supplementary_file_3.xlsx]

## Sheet: sample info
Sample name	Total deduplicated reads	Cells passed filter	Median TSS enrichment score	Median unique fragments	Peak set
E18.5	117405873	7092	21.5065	5691	222919 peaks called from iterative overlap peak merging procedure
P0.5	108953897	6898	22.3545	5374.5	222919 peaks called from iterative overlap peak merging procedure
P2.5	125223008	6669	21.605	6584	222919 peaks called from iterative overlap peak merging procedure
P5.5	104857808	7299	22.675	4755	222919 peaks called from iterative overlap peak merging procedure

## Sheet: cell info
	Sample	TSSEnrichment	ReadsInTSS	ReadsInPromoter	ReadsInBlacklist	PromoterRatio	NucleosomeRatio	nMultiFrags	nMonoFrags	nFrags	nDiFrags	DoubletEnrichment	BlacklistRatio	Clusters	predictedGroup_Co	ReadsInPeaks	FRIP
P2#alignments.possorted.tagged_BC00001_N01	P2	5.503	2251	10672	2972	0.0689566	1.6367	8408	29348	77382	39626	1.13333	0.0192034	C8	Innate lymph	24516	0.158409
P2#alignments.possorted.tagged_BC00009_N02	P2	14.532	8065	30243	3014	0.221045	2.44196	7090	19875	68409	41444	3.63333	0.0220293	C8	Innate lymph	55150	0.40309
P2#alignments.possorted.tagged_BC00002_N01	P2	21.099	11486	41509	2801	0.319965	3.33011	13679	14980	64865	36206	1.33333	0.021591	C3	Sertoli cells	74424	0.573684
P2#alignments.possorted.tagged_BC00033_N02	P2	14.046	6483	25267	2739	0.232708	4.51325	8334	9847	54289	36108	2.93333	0.0252261	C2	Germ cells	52061	0.47948
P2#alignments.possorted.tagged_BC00004_N01	P2	20.604	9323	34545	2348	0.322423	3.23989	12449	12635	53571	28487	2.6	0.0219148	C3	Sertoli cells	61816	0.576954
P2#alignments.possorted.tagged_BC00010_N02	P2	7.578	2564	11370	2291	0.107408	1.12977	2144	24852	52929	25933	2.56667	0.0216422	C8	Innate lymph	25346	0.239434
P2#alignments.possorted.tagged_BC00071_N04	P2	5.775	1878	8985	2244	0.0858576	0.893021	1647	27641	52325	23037	2.73333	0.0214429	C8	Macrophages	20188	0.19291
P2#alignments.possorted.tagged_BC00022_N02	P2	14.226	5819	21682	2285	0.207301	1.50292	5274	20894	52296	26128	2.63333	0.0218468	C8	Innate lymph	39027	0.373136
P2#alignments.possorted.tagged_BC00042_N02	P2	11.008	3619	16494	2825	0.160239	6.43528	9374	6922	51467	35171	0.3	0.0274448	C2	Germ cells	40007	0.388667
P2#alignments.possorted.tagged_BC00005_N01	P2	22.697	9158	33730	2147	0.334007	3.74425	13697	10643	50493	26153	5.26667	0.0212604	C3	Sertoli cells	57902	0.573367
P2#alignments.possorted.tagged_BC00041_N03	P2	23.742	9100	32894	2038	0.32609	3.10892	9161	12275	50437	29001	3.6	0.0202034	C3	Sertoli cells	59236	0.587228
P2#alignments.possorted.tagged_BC00036_N02	P2	20.512	8463	31131	2312	0.311928	4.27439	10485	9461	49901	29955	1.33333	0.0231659	C2	Sertoli cells	55420	0.555299
P2#alignments.possorted.tagged_BC00026_N02	P2	22.972	8573	31175	1932	0.338292	3.60356	9428	10009	46077	26640	1.36667	0.0209649	C3	Sertoli cells	54645	0.592975
P2#alignments.possorted.tagged_BC00194_N04	P2	7.928	2178	9064	1947	0.103188	1.04937	1263	21431	43920	21226	3.3	0.0221653	C8	Innate lymph	18764	0.213616
P2#alignments.possorted.tagged_BC00023_N02	P2	22.444	8580	30958	2015	0.357631	3.15574	8845	10415	43282	24022	1.66667	0.0232776	C3	Sertoli cells	51954	0.60018
P2#alignments.possorted.tagged_BC00006_N01	P2	5.563	1239	5623	1666	0.0665318	1.80486	1299	15066	42258	25893	0.266667	0.0197122	C8	Germ cells	13636	0.161342
P2#alignments.possorted.tagged_BC00011_N01	P2	7.254	2176	10476	1895	0.127139	10.8729	10686	3470	41199	27043	0.233333	0.0229981	C2	Germ cells	24620	0.298794
P2#alignments.possorted.tagged_BC00008_N01	P2	23.837	8270	29999	1884	0.364499	3.19395	9422	9812	41151	21917	4.5	0.0228913	C5	PTM	51817	0.629596
P2#alignments.possorted.tagged_BC00078_N02	P2	17.783	5990	22935	1791	0.287406	2.45874	7834	11536	39900	20530	2.46667	0.0224436	C8	Innate lymph	40271	0.504649
P2#alignments.possorted.tagged_BC00093_N03	P2	8.937	2762	12140	2165	0.152532	4.91747	4562	6725	39795	28508	1.3	0.0272019	C2	Germ cells	25848	0.324764
P2#alignments.possorted.tagged_BC00148_N03	P2	11.129	3046	13642	1663	0.171485	6.71002	4997	5159	39776	29620	2.23333	0.0209046	C2	Germ cells	29133	0.366213
P2#alignments.possorted.tagged_BC00013_N02	P2	23.319	7831	28638	1704	0.360935	3.57156	9745	8678	39672	21249	5.23333	0.0214761	C8	Innate lymph	49043	0.618106
P2#alignments.possorted.tagged_BC00014_N01	P2	8.365	2391	11389	2094	0.143561	7.7505	9366	4533	39666	25767	0.1	0.0263954	C2	Germ cells	28213	0.355632
P2#alignments.possorted.tagged_BC00030_N02	P2	4.495	1026	5580	1807	0.0713646	1.52601	3253	15477	39095	20365	0.6	0.0231104	C8	Stroma	12928	0.165341
P2#alignments.possorted.tagged_BC00012_N01	P2	20.593	6666	24657	1619	0.317181	3.2341	9005	9180	38869	20684	0.5	0.0208264	C3	Sertoli cells	44565	0.573272
P2#alignments.possorted.tagged_BC00084_N02	P2	19.047	6310	23442	1551	0.309465	3.38165	6494	8644	37875	22737	2.3	0.0204752	C5	PTM	44560	0.588251
P2#alignments.possorted.tagged_BC00222_N03	P2	24.131	7470	27225	1684	0.36398	3.11023	6864	9099	37399	21436	0.5	0.022514	C3	Sertoli cells	46137	0.616821
P2#alignments.possorted.tagged_BC00101_N02	P2	11.15	2911	12548	1584	0.169412	9.96979	6869	3376	37034	26789	2.96667	0.0213858	C2	Germ cells	26898	0.363153
P2#alignments.possorted.tagged_BC00016_N01	P2	20.818	6518	24242	1627	0.332246	3.51566	10045	8079	36482	18358	0.766667	0.0222987	C3	Sertoli cells	41628	0.570528
P2#alignments.possorted.tagged_BC00086_N02	P2	22.838	7093	25154	1562	0.347796	3.60018	6760	7861	36162	21541	0.466667	0.0215973	C3	Sertoli cells	44312	0.612687
P2#alignments.possorted.tagged_BC00020_N01	P2	16.108	3872	15757	2076	0.223866	5.36286	7376	5531	35193	22286	2.23333	0.0294945	C2	Germ cells	30857	0.438397
P2#alignments.possorted.tagged_BC00019_N01	P2	20.738	6378	23664	1495	0.338492	3.85284	9416	7203	34955	18336	4.06667	0.0213846	C5	PTM	42572	0.608954
P2#alignments.possorted.tagged_BC00038_N02	P2	10.889	2491	11146	1638	0.163359	8.47376	7225	3601	34115	23289	0.333333	0.024007	C2	Germ cells	24263	0.355606
P2#alignments.possorted.tagged_BC00025_N01	P2	8.202	2013	9464	1653	0.13925	9.04493	8963	3383	33982	21636	0.366667	0.0243217	C2	Germ cells	21874	0.321847
P2#alignments.possorted.tagged_BC00024_N01	P2	21.355	5845	21955	1488	0.328697	3.86482	7557	6865	33397	18975	3.6	0.0222775	C5	PTM	39276	0.588017
P2#alignments.possorted.tagged_BC00027_N01	P2	23.103	6627	24147	1580	0.368848	3.34125	7660	7540	32733	17533	5.53333	0.0241347	C8	Innate lymph	38786	0.59246
P2#alignments.possorted.tagged_BC00140_N02	P2	10.304	2456	11266	1460	0.17515	8.32744	6314	3448	32161	22399	0.633333	0.0226983	C2	Germ cells	24215	0.376465
P2#alignments.possorted.tagged_BC00021_N01	P2	4.592	974	5337	1511	0.0830661	2.78075	9167	8497	32125	14461	0.166667	0.0235175	C8	Stroma	12111	0.188498
P2#alignments.possorted.tagged_BC00029_N01	P2	20.091	5286	19310	1338	0.30107	3.78928	7736	6696	32069	17637	0.733333	0.0208613	C3	Sertoli cells	34678	0.540678
P2#alignments.possorted.tagged_BC00031_N01	P2	21.435	5250	19270	1460	0.304423	4.28292	9125	5991	31650	16534	1.36667	0.0230648	C3	Sertoli cells	34264	0.541295
P2#alignments.possorted.tagged_BC00032_N01	P2	12.688	2877	11837	1589	0.188104	5.48475	6006	4852	31464	20606	3.16667	0.0252511	C2	Germ cells	24879	0.395357
P2#alignments.possorted.tagged_BC00210_N03	P2	10.324	2148	8711	1414	0.139595	0.665741	701	18731	31201	11769	3.26667	0.0226595	C8	Neutrophils	16977	0.272059
P2#alignments.possorted.tagged_BC00139_N02	P2	22.467	5639	20486	1359	0.329664	3.63885	6707	6698	31071	17666	0.433333	0.0218693	C3	Sertoli cells	36798	0.59216
P2#alignments.possorted.tagged_BC00151_N02	P2	8.654	1866	8789	1697	0.142047	10.295	7675	2739	30937	20523	0.0666667	0.0274267	C2	Germ cells	20565	0.332369
P2#alignments.possorted.tagged_BC00336_N03	P2	13.447	3538	14015	1439	0.226868	1.63752	4261	11711	30888	14916	3	0.0232938	C6	Stroma	24872	0.402616
P2#alignments.possorted.tagged_BC00060_N02	P2	18.904	4735	17955	1217	0.292446	3.20866	6339	7294	30698	17065	0.466667	0.0198221	C3	Sertoli cells	33762	0.549906
P2#alignments.possorted.tagged_BC00462_N04	P2	12.346	2737	11177	1459	0.18278	7.75824	5359	3491	30575	21725	0.333333	0.0238594	C2	Germ cells	24912	0.407392
P2#alignments.possorted.tagged_BC00145_N03	P2	12.534	2842	11813	1655	0.193955	6.38792	6167	4122	30453	20164	2.36667	0.027173	C2	Germ cells	22469	0.368913
P2#alignments.possorted.tagged_BC00063_N02	P2	18.217	4149	16004	1395	0.265257	5.66821	7253	4524	30167	18390	3.63333	0.0231213	C2	Germ cells	29368	0.486757
P2#alignments.possorted.tagged_BC00034_N01	P2	22.393	5496	19985	1228	0.331327	2.79263	5772	7952	30159	16435	3.56667	0.0203588	C3	Sertoli cells	35004	0.580324
P2#alignments.possorted.tagged_BC00153_N02	P2	20.877	5187	18771	1387	0.313027	4.12267	7033	5853	29983	17097	1.4	0.0231298	C3	Sertoli cells	34097	0.568606
P2#alignments.possorted.tagged_BC00039_N01	P2	23.075	4836	18108	1275	0.303296	3.82028	7853	6193	29852	15806	3.26667	0.0213554	C3	Sertoli cells	32976	0.552325
P2#alignments.possorted.tagged_BC00270_N04	P2	6.711	993	4641	1371	0.0777413	1.5783	1365	11577	29849	16907	0.6	0.0229656	C8	Innate lymph	11270	0.188784
P2#alignments.possorted.tagged_BC00028_N01	P2	7.154	1391	6509	1165	0.110046	1.86542	6541	10321	29574	12712	1.03333	0.0196964	C8	Macrophages	12447	0.210438
P2#alignments.possorted.tagged_BC00040_N01	P2	15.806	4007	15632	1188	0.266503	3.70377	7162	6235	29328	15931	0.766667	0.0202537	C5	PTM	31216	0.532188
P2#alignments.possorted.tagged_BC00097_N02	P2	17.891	4888	18650	1179	0.318891	3.96384	6820	5891	29242	16531	4.93333	0.0201594	C5	PTM	33433	0.571661
P2#alignments.possorted.tagged_BC00154_N02	P2	24.607	5741	19986	1267	0.343686	3.71248	6824	6170	29076	16082	2.7	0.0217877	C3	Sertoli cells	33834	0.58182
P2#alignments.possorted.tagged_BC00252_N03	P2	22.787	5489	19637	1258	0.339423	3.7468	6638	6094	28927	16195	2.13333	0.0217444	C3	Sertoli cells	33274	0.575137
P2#alignments.possorted.tagged_BC00043_N01	P2	21.006	5198	19267	1302	0.340118	3.15979	6483	6809	28324	15032	1.8	0.022984	C3	Sertoli cells	33055	0.583516
P2#alignments.possorted.tagged_BC00347_N03	P2	24.286	5752	20435	1197	0.366166	2.29601	3123	8466	27904	16315	0.8	0.0214485	C3	Sertoli cells	35040	0.627867
P2#alignments.possorted.tagged_BC00239_N03	P2	21.543	4776	16804	1195	0.302317	3.64982	5383	5977	27792	16432	0.4	0.021499	C3	Sertoli cells	30024	0.540155
P2#alignments.possorted.tagged_BC00045_N01	P2	21.878	5005	18327	1238	0.331399	3.40303	6210	6280	27651	15161	0.7	0.0223862	C3	Sertoli cells	32867	0.594318
P2#alignments.possorted.tagged_BC00255_N02	P2	9.698	1719	7989	1760	0.144477	5.53772	4579	4229	27648	18840	0	0.0318287	C2	Germ cells	20390	0.368743
P2#alignments.possorted.tagged_BC00049_N01	P2	10.128	1918	8963	1329	0.162215	9.74562	7886	2571	27627	17170	0.366667	0.0240526	C2	Germ cells	19212	0.347703
P2#alignments.possorted.tagged_BC00167_N02	P2	20.491	4667	17261	1106	0.313677	3.0432	4951	6805	27514	15758	3.56667	0.0200989	C5	PTM	32203	0.585211
P2#alignments.possorted.tagged_BC00237_N02	P2	22.696	5513	19955	1138	0.365463	3.03145	5950	6772	27301	14579	2.4	0.0208417	C3	Sertoli cells	33832	0.619611
P2#alignments.possorted.tagged_BC00046_N01	P2	6.623	1291	5713	1066	0.105546	4.78909	5832	4675	27064	16557	0.3	0.0196941	C8	Macrophages	11230	0.207471
P2#alignments.possorted.tagged_BC00050_N01	P2	13.116	2411	10514	1585	0.195116	4.82174	4517	4628	26943	17798	3.13333	0.0294139	C2	Germ cells	22363	0.415006
P2#alignments.possorted.tagged_BC00259_N02	P2	14.29	2670	11024	1302	0.205365	6.98334	5466	3362	26840	18012	1.96667	0.0242548	C2	Germ cells	21493	0.400391
P2#alignments.possorted.tagged_BC00290_N04	P2	12.096	2474	10430	1340	0.194321	7.15219	4173	3292	26837	19372	0.866667	0.0249655	C2	Germ cells	22307	0.415602
P2#alignments.possorted.tagged_BC00274_N03	P2	23.297	5059	17814	1194	0.332922	3.09083	4451	6540	26754	15763	0.566667	0.0223144	C3	Sertoli cells	31235	0.583744
P2#alignments.possorted.tagged_BC00419_N03	P2	21.489	4612	16861	1109	0.320393	2.99166	4740	6592	26313	14981	0.733333	0.0210732	C3	Sertoli cells	30661	0.582621
P2#alignments.possorted.tagged_BC00251_N03	P2	26.947	5661	19364	1208	0.368641	2.46034	1934	7590	26264	16740	1.13333	0.0229973	C3	Sertoli cells	32256	0.614072
P2#alignments.possorted.tagged_BC00242_N02	P2	21.618	4607	16825	1147	0.321825	4.06687	6694	5159	26140	14287	1.06667	0.0219396	C3	Sertoli cells	29761	0.569262
P2#alignments.possorted.tagged_BC00226_N02	P2	14.854	2648	10301	1418	0.197739	5.49551	4725	4010	26047	17312	0.533333	0.02722	C2	Germ cells	21165	0.406285
P2#alignments.possorted.tagged_BC00180_N02	P2	23.953	5141	18164	1075	0.349187	3.3147	4501	6028	26009	15480	1.3	0.0206659	C3	Sertoli cells	31684	0.609097
P2#alignments.possorted.tagged_BC00353_N03	P2	10.517	1673	6616	1201	0.128073	3.29553	2440	6013	25829	17376	1.86667	0.0232491	C4	Leydig cells	12955	0.250784
P2#alignments.possorted.tagged_BC00380_N03	P2	18.58	3969	15712	1065	0.304225	3.58342	6342	5634	25823	13847	5.6	0.0206212	C5	PTM	29200	0.565387
P2#alignments.possorted.tagged_BC00599_N03	P2	6.978	1103	4808	1040	0.0934936	1.28947	390	11231	25713	14092	0.533333	0.0202232	C8	Macrophages	11787	0.229203
P2#alignments.possorted.tagged_BC00326_N03	P2	13.528	2514	9875	1415	0.192675	8.38338	5662	2731	25626	17233	1.1	0.0276087	C2	Germ cells	20529	0.40055
P2#alignments.possorted.tagged_BC00061_N01	P2	8.504	1473	6769	1401	0.132429	9.06181	4458	2540	25557	18559	0	0.0274093	C2	Germ cells	16965	0.331905
P2#alignments.possorted.tagged_BC00056_N01	P2	15.486	3613	13885	1095	0.272822	3.80223	6528	5299	25447	13620	3	0.0215153	C3	Sertoli cells	27533	0.540987
P2#alignments.possorted.tagged_BC00054_N01	P2	17.465	3969	14684	1276	0.288623	3.61251	5606	5515	25438	14317	3.36667	0.0250806	C8	Innate lymph	25426	0.499764
P2#alignments.possorted.tagged_BC00241_N02	P2	23.651	4682	17047	1058	0.338476	3.51452	6243	5578	25182	13361	0.933333	0.0210071	C3	Sertoli cells	29775	0.591196
P2#alignments.possorted.tagged_BC00064_N01	P2	9.89	1723	8016	1439	0.159891	8.01042	5698	2782	25067	16587	0	0.0287031	C2	Germ cells	18594	0.370886
P2#alignments.possorted.tagged_BC00095_N02	P2	21.5	3887	14878	1049	0.297715	4.00741	5862	4990	24987	14135	0.5	0.0209909	C3	Sertoli cells	27983	0.559951
P2#alignments.possorted.tagged_BC00129_N02	P2	21.362	4984	18005	1118	0.362084	3.1563	5644	5982	24863	13237	4.73333	0.0224832	C3	Sertoli cells	30459	0.612537
P2#alignments.possorted.tagged_BC00074_N01	P2	7.995	1300	6161	1207	0.125535	9.89654	6084	2252	24539	16203	0	0.0245935	C2	Germ cells	14306	0.291495
P2#alignments.possorted.tagged_BC01079_N04	P2	9.232	1753	7970	1187	0.162859	6.8051	1131	3135	24469	20203	0.233333	0.0242552	C2	Germ cells	18547	0.37899
P2#alignments.possorted.tagged_BC00069_N02	P2	22.725	4533	16335	1152	0.334446	3.76693	5815	5123	24421	13483	0.866667	0.0235863	C3	Sertoli cells	28597	0.5855
P2#alignments.possorted.tagged_BC00208_N02	P2	17.977	3695	13831	921	0.283748	3.80142	6666	5076	24372	12630	0.533333	0.0188946	C3	Sertoli cells	26097	0.535389
P2#alignments.possorted.tagged_BC00072_N01	P2	15.325	2461	10143	1403	0.20987	6.13463	4631	3387	24165	16147	4.63333	0.0290296	C2	Germ cells	21245	0.439582
P2#alignments.possorted.tagged_BC00067_N01	P2	22.139	4349	16825	1033	0.349211	3.3673	5343	5516	24090	13231	5.36667	0.0214404	C6	Stroma	27519	0.571171
P2#alignments.possorted.tagged_BC00700_N03	P2	10.532	1569	6941	1231	0.144707	7.39153	4395	2858	23983	16730	0.266667	0.025664	C2	Germ cells	15614	0.325522
P2#alignments.possorted.tagged_BC00250_N02	P2	11.74	1660	6281	1240	0.131987	1.35374	233	10109	23794	13452	1.4	0.026057	C8	Neutrophils	11209	0.235543
P2#alignments.possorted.tagged_BC00449_N03	P2	10.875	1977	8289	1210	0.174586	7.71796	4944	2723	23739	16072	0.333333	0.0254855	C2	Germ cells	17187	0.361999
P2#alignments.possorted.tagged_BC00321_N02	P2	9.724	1704	7835	1294	0.167079	7.02979	4983	2920	23447	15544	0.0333333	0.0275941	C2	Germ cells	17588	0.375059
P2#alignments.possorted.tagged_BC00079_N01	P2	19.524	4348	16112	1043	0.343862	3.44892	5750	5266	23428	12412	1.73333	0.0222597	C3	Sertoli cells	27098	0.578325
P2#alignments.possorted.tagged_BC00402_N02	P2	9.614	1573	7317	1455	0.156213	8.01463	5422	2598	23420	15400	0.0666667	0.0310632	C2	Germ cells	17069	0.364411
P2#alignments.possorted.tagged_BC00644_N04	P2	25.205	5295	18376	1126	0.396924	2.57112	2601	6482	23148	14065	2.1	0.0243218	C3	Sertoli cells	29836	0.644462
P2#alignments.possorted.tagged_BC00107_N02	P2	25.482	4594	16569	1109	0.358063	2.68189	5029	6284	23137	11824	0.866667	0.0239659	C3	Sertoli cells	27705	0.598716
P2#alignments.possorted.tagged_BC00085_N01	P2	19.438	4113	14927	984	0.324289	4.39372	6469	4267	23015	12279	1.9	0.0213774	C3	Sertoli cells	26333	0.572083
P2#alignments.possorted.tagged_BC00534_N04	P2	21.336	3825	13982	1018	0.303772	2.71014	4100	6203	23014	12711	4.5	0.022117	C6	Stroma	22502	0.488876
P2#alignments.possorted.tagged_BC00360_N04	P2	22.558	4887	17298	1013	0.377011	2.74975	3112	6118	22941	13711	2.73333	0.0220784	C3	Sertoli cells	29289	0.638355
P2#alignments.possorted.tagged_BC00253_N02	P2	9.752	1763	8005	1388	0.174507	5.86501	5591	3341	22936	14004	0.966667	0.0302581	C2	Germ cells	16683	0.363686
P2#alignments.possorted.tagged_BC00591_N03	P2	13.562	2493	10232	1166	0.224278	5.86458	4355	3323	22811	15133	0.533333	0.0255578	C2	Germ cells	19471	0.42679
P2#alignments.possorted.tagged_BC00081_N01	P2	15.653	2324	9203	1112	0.202077	4.18111	7132	4395	22771	11244	1.33333	0.024417	C5	PTM	17805	0.390958
P2#alignments.possorted.tagged_BC00348_N02	P2	9.578	1543	6656	982	0.146157	3.12127	6118	5525	22770	11127	1.5	0.0215635	C8	Macrophages	12022	0.263988
P2#alignments.possorted.tagged_BC00083_N01	P2	16.884	3257	12545	881	0.275581	4.58415	6509	4076	22761	12176	0.866667	0.0193533	C5	PTM	25598	0.562322
P2#alignments.possorted.tagged_BC00638_N03	P2	13.493	2344	10126	1171	0.223987	6.29397	3811	3099	22604	15694	1.83333	0.0259025	C2	Germ cells	19077	0.421983
P2#alignments.possorted.tagged_BC00089_N01	P2	20.633	3897	14022	926	0.311392	3.91916	6321	4577	22515	11617	0.5	0.0205641	C3	Sertoli cells	24844	0.551721
P2#alignments.possorted.tagged_BC00298_N03	P2	21.823	4320	15547	939	0.34595	2.4821	3516	6453	22470	12501	0.533333	0.0208945	C3	Sertoli cells	26867	0.597842
P2#alignments.possorted.tagged_BC00725_N03	P2	13.08	1790	7763	1105	0.174418	7.72364	5026	2551	22254	14677	0.266667	0.024827	C2	Germ cells	17141	0.385122
P2#alignments.possorted.tagged_BC00291_N02	P2	19.695	3690	13842	844	0.311112	4.11755	5680	4347	22246	12219	2.5	0.0189697	C6	Stroma	25721	0.578104
P2#alignments.possorted.tagged_BC00196_N02	P2	21.043	4070	14979	999	0.33906	3.8356	5710	4568	22089	11811	4.86667	0.0226131	C6	Stroma	26665	0.603581
P2#alignments.possorted.tagged_BC00094_N01	P2	18.85	3246	12558	990	0.284478	4.31343	5624	4154	22072	12294	0.466667	0.0224266	C3	Sertoli cells	23634	0.535384
P2#alignments.possorted.tagged_BC00362_N02	P2	6.331	1039	4636	823	0.105187	1.71058	2644	8130	22037	11263	1.1	0.0186731	C8	Innate lymph	10065	0.228366
P2#alignments.possorted.tagged_BC00621_N03	P2	20.086	3743	13513	928	0.307337	3.28037	3356	5136	21984	13492	2.66667	0.0211063	C8	Leydig cells	24625	0.560066
P2#alignments.possorted.tagged_BC00218_N02	P2	23.69	4283	15531	949	0.354638	3.84661	5319	4518	21897	12060	2.43333	0.0216696	C3	Sertoli cells	26790	0.611728
P2#alignments.possorted.tagged_BC00763_N04	P2	22.721	3970	14107	945	0.322726	3.1694	3127	5242	21856	13487	0.333333	0.0216188	C3	Sertoli cells	25165	0.5757
P2#alignments.possorted.tagged_BC00453_N02	P2	26.022	4284	15020	875	0.348718	3.86799	4594	4424	21536	12518	4	0.0203148	C3	Sertoli cells	25731	0.597395
P2#alignments.possorted.tagged_BC00169_N02	P2	18.825	3546	13447	932	0.312474	4.51294	5561	3903	21517	12053	0.3	0.0216573	C3	Sertoli cells	24105	0.560138
P2#alignments.possorted.tagged_BC00421_N02	P2	15.104	2273	8983	1078	0.20914	7.57325	4549	2505	21476	14422	1.8	0.0250978	C2	Germ cells	17516	0.407804
P2#alignments.possorted.tagged_BC00186_N02	P2	10.938	1646	7394	1242	0.172186	7.17943	4648	2625	21471	14198	0	0.0289227	C2	Germ cells	16845	0.392273
P2#alignments.possorted.tagged_BC01051_N03	P2	14.552	2403	9655	1102	0.225605	6.10897	3423	3010	21398	14965	5.26667	0.0257501	C2	Germ cells	19461	0.454739
P2#alignments.possorted.tagged_BC00096_N01	P2	22.095	4095	15380	1056	0.359699	3.43088	5004	4825	21379	11550	5.46667	0.0246971	C6	Stroma	25293	0.591538
P2#alignments.possorted.tagged_BC00245_N02	P2	11.173	1625	7334	1230	0.171885	8.12099	4449	2339	21334	14546	0.1	0.0288272	C2	Germ cells	16756	0.392706
P2#alignments.possorted.tagged_BC00103_N01	P2	19.832	3335	12634	839	0.296461	3.96227	5271	4294	21308	11743	2.93333	0.0196874	C5	PTM	23571	0.553102
P2#alignments.possorted.tagged_BC00219_N02	P2	18.187	3536	12863	951	0.30353	3.8744	5148	4347	21189	11694	1.16667	0.0224409	C3	Sertoli cells	23268	0.549058
P2#alignments.possorted.tagged_BC00446_N02	P2	10.387	1390	6425	1226	0.151662	6.98718	4477	2652	21182	14053	0	0.0289397	C2	Germ cells	15221	0.359291
P2#alignments.possorted.tagged_BC00104_N01	P2	23.223	4093	14621	923	0.345242	4.09504	5470	4156	21175	11549	1.3	0.0217946	C3	Sertoli cells	25554	0.6034
P2#alignments.possorted.tagged_BC00273_N03	P2	16.565	2769	10548	895	0.249432	2.18098	2573	6647	21144	11924	3.36667	0.0211644	C5	PTM	18918	0.447361
P2#alignments.possorted.tagged_BC00309_N03	P2	23.508	4345	15087	910	0.3586	3.28257	3293	4912	21036	12831	1.03333	0.0216296	C3	Sertoli cells	26353	0.626379
P2#alignments.possorted.tagged_BC00470_N03	P2	10.178	1614	7248	1098	0.172596	7.9235	3938	2353	20997	14706	0.233333	0.0261466	C2	Germ cells	15004	0.357289
P2#alignments.possorted.tagged_BC00102_N01	P2	21.355	3796	13611	979	0.326701	3.42554	5373	4707	20831	10751	2.83333	0.0234986	C3	Sertoli cells	23747	0.569992
P2#alignments.possorted.tagged_BC00439_N02	P2	18.617	3112	11844	856	0.284547	3.81759	4777	4320	20812	11715	3.5	0.0205651	C8	Innate lymph	23185	0.55701
P2#alignments.possorted.tagged_BC00428_N02	P2	20.887	3196	11744	854	0.282634	2.5551	3311	5844	20776	11621	3.56667	0.0205526	C4	Leydig cells	22514	0.541827
P2#alignments.possorted.tagged_BC00971_N03	P2	12.19	1656	6942	1138	0.167738	7.35406	3662	2477	20693	14554	0.0666667	0.0274972	C2	Germ cells	15348	0.37085
P2#alignments.possorted.tagged_BC00272_N02	P2	24.711	3856	13814	987	0.335731	3.57992	4571	4492	20573	11510	1.76667	0.0239878	C3	Sertoli cells	23247	0.564988
P2#alignments.possorted.tagged_BC00108_N01	P2	16.142	2845	10852	772	0.264747	3.39618	4203	4662	20495	11630	3.4	0.0188339	C8	Leydig cells	20672	0.504318
P2#alignments.possorted.tagged_BC00110_N01	P2	22.827	3735	13458	812	0.328468	3.47195	4322	4581	20486	11583	0.2	0.0198184	C3	Sertoli cells	23775	0.580274
P2#alignments.possorted.tagged_BC00200_N02	P2	9.73	1479	6664	962	0.163093	7.89034	5152	2298	20430	12980	0.2	0.0235438	C2	Germ cells	14253	0.348825
P2#alignments.possorted.tagged_BC00387_N02	P2	20.755	3113	11819	761	0.289355	3.51138	4499	4527	20423	11397	4.46667	0.018631	C5	PTM	22459	0.549846
P2#alignments.possorted.tagged_BC00112_N01	P2	18.138	3380	12814	890	0.314022	4.15097	5431	3961	20403	11011	4.66667	0.0218105	C6	Stroma	23062	0.565162
P2#alignments.possorted.tagged_BC00117_N01	P2	15.652	2316	9269	1026	0.227415	4.89159	4614	3459	20379	12306	5.26667	0.025173	C2	Germ cells	19334	0.474361
P2#alignments.possorted.tagged_BC00391_N03	P2	17.035	2770	10436	705	0.258227	3.32883	2311	4668	20207	13228	0.466667	0.0174444	C4	Leydig cells	21420	0.530014
P2#alignments.possorted.tagged_BC00131_N03	P2	14.786	2143	8152	1106	0.201852	4.30976	3116	3803	20193	13274	0.666667	0.0273857	C2	Germ cells	15483	0.383375
P2#alignments.possorted.tagged_BC00910_N03	P2	26.369	4461	15039	877	0.372548	3.26092	1965	4737	20184	13482	3.73333	0.0217251	C8	Innate lymph	26282	0.65106
P2#alignments.possorted.tagged_BC00260_N02	P2	9.22	1299	5692	673	0.141325	2.24075	4315	6214	20138	9609	3.5	0.0167097	C8	Stroma	12192	0.302711
P2#alignments.possorted.tagged_BC00880_N04	P2	16.842	2475	9684	1113	0.242889	4.07639	3179	3927	19935	12829	5.7	0.0279157	C2	Germ cells	18834	0.472385
P2#alignments.possorted.tagged_BC00423_N02	P2	20.479	3144	11604	821	0.292705	3.09715	3801	4838	19822	11183	1.66667	0.0207093	C3	Sertoli cells	20017	0.504919
P2#alignments.possorted.tagged_BC01824_N06	P2	26.454	4649	15509	873	0.393829	2.06793	648	6418	19690	12624	0.633333	0.0221686	C3	Sertoli cells	26007	0.660411
P2#alignments.possorted.tagged_BC00116_N01	P2	19.462	3381	12948	784	0.32888	3.18741	4955	4701	19685	10029	2.96667	0.0199136	C6	Stroma	22237	0.564821
P2#alignments.possorted.tagged_BC00472_N02	P2	20.934	3478	13026	872	0.331046	3.87584	5329	4035	19674	10310	0.4	0.0221612	C3	Sertoli cells	22498	0.57177
P2#alignments.possorted.tagged_BC00130_N01	P2	20.475	3288	12180	803	0.310825	3.64509	4886	4218	19593	10489	0.333333	0.020492	C3	Sertoli cells	22449	0.572883
P2#alignments.possorted.tagged_BC00408_N02	P2	18.096	3107	11591	771	0.296688	3.24837	4038	4598	19534	10898	4.63333	0.0197348	C5	PTM	21559	0.551833
P2#alignments.possorted.tagged_BC00492_N02	P2	21.966	3106	11275	885	0.289147	3.65656	4525	4187	19497	10785	0.1	0.0226958	C3	Sertoli cells	21577	0.553342
P2#alignments.possorted.tagged_BC00134_N01	P2	16.231	2500	9829	871	0.252401	5.00771	5155	3241	19471	11075	2.76667	0.0223666	C2	Germ cells	17634	0.452827
P2#alignments.possorted.tagged_BC00127_N01	P2	23.72	3378	12582	833	0.323461	4.10205	4823	3812	19449	10814	4	0.021415	C6	Stroma	22086	0.567793
P2#alignments.possorted.tagged_BC00466_N02	P2	22.926	3728	13380	866	0.345148	3.97638	4634	3895	19383	10854	0.733333	0.0223392	C3	Sertoli cells	22681	0.585075
P2#alignments.possorted.tagged_BC00124_N01	P2	16.163	2914	12004	917	0.309925	3.1945	4706	4617	19366	10043	3.86667	0.0236755	C5	PTM	21101	0.544795
P2#alignments.possorted.tagged_BC00149_N02	P2	19.359	3236	11927	812	0.309358	4.53301	5384	3484	19277	10409	3.8	0.0210614	C6	Stroma	21424	0.555688
P2#alignments.possorted.tagged_BC00549_N02	P2	9.381	1407	6026	1101	0.1563	7.57899	4404	2247	19277	12626	0	0.0285573	C2	Germ cells	14174	0.36764
P2#alignments.possorted.tagged_BC00125_N01	P2	23.549	3865	13412	845	0.347948	2.86853	2212	4982	19273	12079	0.633333	0.0219219	C3	Sertoli cells	24134	0.626109
P2#alignments.possorted.tagged_BC00456_N02	P2	19.473	2960	11296	694	0.29325	3.61317	4812	4175	19260	10273	1.56667	0.0180166	C5	PTM	22082	0.573261
P2#alignments.possorted.tagged_BC00342_N02	P2	18.741	2915	11095	831	0.289143	3.66019	4318	4117	19186	10751	0.466667	0.0216564	C3	Sertoli cells	20609	0.537084
P2#alignments.possorted.tagged_BC00555_N03	P2	27.473	3954	13837	820	0.360658	2.29718	1581	5818	19183	11784	0.833333	0.0213731	C3	Sertoli cells	24271	0.632617
P2#alignments.possorted.tagged_BC00132_N01	P2	20.807	3583	13332	860	0.347785	3.2565	4739	4503	19167	9925	3.5	0.0224344	C6	Stroma	22348	0.582981
P2#alignments.possorted.tagged_BC00146_N01	P2	11.975	1282	5950	1093	0.155409	8.25677	4008	2068	19143	13067	0.0333333	0.0285483	C2	Germ cells	12992	0.339341
P2#alignments.possorted.tagged_BC00605_N03	P2	11.842	1495	6168	996	0.161398	7.76112	3703	2181	19108	13224	0.1	0.0260624	C2	Germ cells	13152	0.344149
P2#alignments.possorted.tagged_BC00142_N01	P2	17.492	2862	11119	760	0.29144	4.03723	5071	3787	19076	10218	3.16667	0.0199203	C8	Innate lymph	21079	0.552501
P2#alignments.possorted.tagged_BC00641_N02	P2	13.998	2043	8522	959	0.223405	6.28812	3860	2617	19073	12596	0.766667	0.0251403	C2	Germ cells	15898	0.416767
P2#alignments.possorted.tagged_BC00143_N01	P2	15.348	2612	9989	780	0.262716	4.45353	4344	3486	19011	11181	0.766667	0.0205144	C6	Stroma	19211	0.50526
P2#alignments.possorted.tagged_BC00141_N01	P2	19.189	3004	11271	759	0.296543	3.87657	4732	3897	19004	10375	2.43333	0.0199695	C6	Stroma	20330	0.534887
P2#alignments.possorted.tagged_BC00137_N01	P2	20.368	2808	10595	647	0.279625	3.71973	5205	4014	18945	9726	1.2	0.0170757	C5	PTM	20842	0.550066
P2#alignments.possorted.tagged_BC01109_N03	P2	22.551	2961	10781	796	0.285197	3.47573	3797	4223	18901	10881	0.2	0.0210571	C3	Sertoli cells	20351	0.538358
P2#alignments.possorted.tagged_BC00133_N01	P2	14.993	2597	9764	810	0.258965	3.51005	4472	4180	18852	10200	0.133333	0.0214831	C3	Sertoli cells	17702	0.469499
P2#alignments.possorted.tagged_BC00494_N02	P2	25.847	3955	13820	859	0.366773	3.32011	3535	4361	18840	10944	0.9	0.0227972	C3	Sertoli cells	22707	0.602627
P2#alignments.possorted.tagged_BC00369_N02	P2	12.791	1673	7085	917	0.188732	8.34761	5318	2008	18770	11444	0.266667	0.0244273	C2	Germ cells	14664	0.390623
P2#alignments.possorted.tagged_BC00410_N02	P2	21.734	3600	13312	883	0.354816	2.88949	2042	4823	18759	11894	0.4	0.0235354	C3	Sertoli cells	22875	0.609707
P2#alignments.possorted.tagged_BC00155_N01	P2	16.317	2884	10707	769	0.286329	4.52349	5153	3385	18697	10159	5.7	0.0205648	C8	Innate lymph	19908	0.532385
P2#alignments.possorted.tagged_BC00150_N01	P2	20.536	3049	11801	841	0.317095	3.80454	4403	3873	18608	10332	4.46667	0.0225978	C6	Stroma	20108	0.540305
P2#alignments.possorted.tagged_BC00683_N02	P2	27.716	4185	14506	865	0.390534	2.96922	3213	4679	18572	10680	2.83333	0.0232877	C3	Sertoli cells	22993	0.619023
P2#alignments.possorted.tagged_BC01017_N03	P2	21.588	3674	12874	900	0.347083	2.85091	3052	4816	18546	10678	0.633333	0.024264	C3	Sertoli cells	22597	0.609215
P2#alignments.possorted.tagged_BC00836_N03	P2	23.456	3447	12086	741	0.327623	3.57579	3494	4031	18445	10920	1	0.0200867	C3	Sertoli cells	21688	0.58791
P2#alignments.possorted.tagged_BC02720_N06	P2	29.491	3902	13481	851	0.365795	1.79197	458	6600	18427	11369	0.366667	0.0230911	C3	Sertoli cells	23781	0.645276
P2#alignments.possorted.tagged_BC01005_N03	P2	19.241	2915	10937	744	0.297201	3.51866	4134	4072	18400	10194	2.83333	0.0202174	C5	PTM	20943	0.569103
P2#alignments.possorted.tagged_BC00533_N02	P2	10.965	1340	5950	975	0.161738	7.62353	3945	2133	18394	12316	0.0666667	0.0265032	C2	Germ cells	13062	0.355061
P2#alignments.possorted.tagged_BC00310_N02	P2	22.725	3397	12556	841	0.342088	3.22079	4292	4348	18352	9712	0.4	0.022913	C3	Sertoli cells	21608	0.58871
P2#alignments.possorted.tagged_BC00860_N04	P2	27.985	4056	13712	785	0.374665	2.77377	2663	4849	18299	10787	0.433333	0.0214493	C3	Sertoli cells	23258	0.635499
P2#alignments.possorted.tagged_BC00745_N03	P2	12.403	1760	7519	932	0.206339	6.02661	2936	2593	18220	12691	0.266667	0.0255763	C2	Germ cells	15363	0.421597
P2#alignments.possorted.tagged_BC00277_N02	P2	17.026	2889	11344	864	0.311323	4.00385	4697	3641	18219	9881	0.133333	0.0237115	C3	Sertoli cells	21170	0.580987
P2#alignments.possorted.tagged_BC00162_N01	P2	12.807	2309	9294	809	0.255386	5.31806	5124	2880	18196	10192	2.86667	0.0222302	C8	Macrophages	15164	0.416685
P2#alignments.possorted.tagged_BC00216_N02	P2	24.341	4081	14628	804	0.402067	2.7407	3357	4863	18191	9971	2.8	0.0220988	C7	Vascular mural cells	22804	0.626793
P2#alignments.possorted.tagged_BC01260_N04	P2	21.614	3340	11957	746	0.33034	3.63695	3059	3903	18098	11136	0.233333	0.02061	C3	Sertoli cells	21249	0.587054
P2#alignments.possorted.tagged_BC00276_N02	P2	21.107	3251	12201	853	0.337268	3.44204	4500	4072	18088	9516	0.333333	0.0235792	C3	Sertoli cells	21413	0.591912
P2#alignments.possorted.tagged_BC00513_N02	P2	17.725	2372	8924	851	0.246847	2.18913	2841	5668	18076	9567	2.3	0.0235395	C3	Sertoli cells	15976	0.441912
P2#alignments.possorted.tagged_BC00978_N03	P2	24.16	3709	13196	860	0.365136	3.05339	3338	4458	18070	10274	4.23333	0.0237963	C8	Innate lymph	22131	0.612369
P2#alignments.possorted.tagged_BC00172_N01	P2	11.53	1380	5821	1044	0.161211	8.97459	4687	1810	18054	11557	0.0666667	0.0289133	C2	Germ cells	12662	0.35067
P2#alignments.possorted.tagged_BC00157_N01	P2	21.931	3245	12077	776	0.334951	3.14627	4214	4348	18028	9466	0.333333	0.0215221	C3	Sertoli cells	20526	0.569281
P2#alignments.possorted.tagged_BC00156_N01	P2	17.841	2847	10567	759	0.293137	3.93538	4184	3652	18024	10188	3.53333	0.0210553	C8	Innate lymph	19848	0.550599
P2#alignments.possorted.tagged_BC00166_N01	P2	11.74	1494	6929	1019	0.192227	6.84632	3926	2297	18023	11800	0	0.0282694	C2	Germ cells	15103	0.418992
P2#alignments.possorted.tagged_BC00152_N02	P2	15.292	1946	7147	915	0.198418	0.899388	1136	9482	18010	7392	0.8	0.0254026	C6	Stroma	11919	0.3309
P2#alignments.possorted.tagged_BC01427_N05	P2	25.076	4027	13697	825	0.381023	2.37667	1337	5323	17974	11314	4.66667	0.0229498	C5	PTM	23061	0.64151
P2#alignments.possorted.tagged_BC01155_N03	P2	14.149	1329	5261	1000	0.146481	4.11187	1820	3513	17958	12625	5.7	0.0278427	C8	Stroma	9760	0.271745
P2#alignments.possorted.tagged_BC00165_N01	P2	18.28	2631	9847	707	0.275287	4.08385	4667	3518	17885	9700	1.36667	0.0197652	C5	PTM	19494	0.544982
P2#alignments.possorted.tagged_BC00611_N02	P2	9.567	1232	5566	767	0.155998	9.72115	4505	1664	17840	11671	0.0666667	0.0214966	C2	Germ cells	12366	0.346581
P2#alignments.possorted.tagged_BC00658_N02	P2	25.028	3640	13102	836	0.367394	3.81919	4343	3700	17831	9788	1.3	0.0234423	C3	Sertoli cells	21910	0.614379
P2#alignments.possorted.tagged_BC01893_N05	P2	15.038	2020	7844	1026	0.220498	4.31908	495	3344	17787	13948	2.16667	0.0288413	C2	Germ cells	16834	0.473211
P2#alignments.possorted.tagged_BC00171_N01	P2	18.873	2621	9633	690	0.271597	3.87198	4532	3640	17734	9562	0.1	0.0194542	C3	Sertoli cells	19057	0.537301
P2#alignments.possorted.tagged_BC00987_N03	P2	21.397	3274	11675	744	0.329672	3.19896	3629	4217	17707	9861	0.866667	0.0210086	C3	Sertoli cells	20292	0.572994
P2#alignments.possorted.tagged_BC00164_N01	P2	20.358	2601	9736	766	0.275495	3.58009	4646	3858	17670	9166	0.3	0.0216752	C3	Sertoli cells	17406	0.49253
P2#alignments.possorted.tagged_BC00570_N02	P2	12.576	2153	9108	857	0.258691	3.19742	4637	4194	17604	8773	0.333333	0.0243411	C8	Macrophages	15431	0.438281
P2#alignments.possorted.tagged_BC01352_N03	P2	26.165	3594	12418	924	0.354983	2.48426	851	5020	17491	11620	0.9	0.0264136	C2	Innate lymph	21513	0.614973
P2#alignments.possorted.tagged_BC01038_N03	P2	22.865	3083	11096	715	0.318229	3.68404	4222	3722	17434	9490	1.83333	0.0205059	C3	Sertoli cells	19771	0.567024
P2#alignments.possorted.tagged_BC00173_N01	P2	16.232	2410	9758	690	0.280145	3.42705	4550	3934	17416	8932	2.1	0.0198094	C8	Innate lymph	18792	0.539504
P2#alignments.possorted.tagged_BC00569_N02	P2	24.939	3350	11932	834	0.344836	2.9745	3012	4353	17301	9936	0.566667	0.0241027	C3	Sertoli cells	21061	0.608664
P2#alignments.possorted.tagged_BC00589_N02	P2	23.124	3188	11328	736	0.329609	3.87489	4475	3525	17184	9184	0.133333	0.0214153	C3	Sertoli cells	20517	0.59698
P2#alignments.possorted.tagged_BC00665_N03	P2	15.025	1859	7252	807	0.212196	2.30458	2444	5171	17088	9473	1.7	0.0236131	C8	Innate lymph	12861	0.376317
P2#alignments.possorted.tagged_BC00193_N01	P2	16.741	2587	9682	686	0.285858	4.04619	4092	3356	16935	9487	2.93333	0.0202539	C5	PTM	18980	0.560378
P2#alignments.possorted.tagged_BC01179_N03	P2	19.762	2984	10881	710	0.323051	3.97518	3343	3385	16841	10113	0.433333	0.0210795	C3	Sertoli cells	19460	0.577757
P2#alignments.possorted.tagged_BC01944_N04	P2	19.72	2410	9049	966	0.269187	3.75608	1423	3534	16808	11851	2.6	0.0287363	C2	Germ cells	17359	0.516391
P2#alignments.possorted.tagged_BC00576_N02	P2	20.107	3036	11118	706	0.331129	4.03237	4467	3336	16788	8985	4.23333	0.0210269	C5	PTM	20258	0.603348
P2#alignments.possorted.tagged_BC00313_N02	P2	21.933	3345	12136	717	0.362788	3.41786	4012	3786	16726	8928	4.26667	0.0214337	C3	Sertoli cells	19650	0.587409
P2#alignments.possorted.tagged_BC00330_N02	P2	19.142	2929	11271	733	0.337354	2.53994	3232	4719	16705	8754	1.73333	0.0219395	C6	Stroma	19542	0.584915
P2#alignments.possorted.tagged_BC00995_N03	P2	25.868	2887	10377	739	0.313315	3.52212	3558	3662	16560	9340	0.0333333	0.0223128	C3	Sertoli cells	18949	0.572132
P2#alignments.possorted.tagged_BC00197_N01	P2	18.109	2460	9772	661	0.295423	3.67071	3953	3541	16539	9045	4.4	0.0199831	C6	Stroma	18319	0.553812
P2#alignments.possorted.tagged_BC02349_N04	P2	27.015	3397	11929	709	0.36276	3.03287	1913	4077	16442	10452	0.466667	0.0215606	C3	Sertoli cells	20284	0.616835
P2#alignments.possorted.tagged_BC00415_N02	P2	21.332	2844	10319	665	0.314584	3.59412	3648	3570	16401	9183	0.3	0.0202732	C3	Sertoli cells	18573	0.566215
P2#alignments.possorted.tagged_BC00201_N01	P2	19.414	2804	10440	725	0.31872	3.35701	3727	3759	16378	8892	0.366667	0.0221333	C3	Sertoli cells	18685	0.57043
P2#alignments.possorted.tagged_BC00467_N02	P2	21.291	3075	11394	764	0.347866	3.43341	3715	3694	16377	8968	2.73333	0.0233254	C8	Innate lymph	19852	0.606094
P2#alignments.possorted.tagged_BC00206_N02	P2	29.102	3924	13091	779	0.400361	2.1272	2315	5228	16349	8806	4.43333	0.0238241	C6	Stroma	20175	0.61701
P2#alignments.possorted.tagged_BC00990_N03	P2	20.759	3124	11138	726	0.34195	3.30277	3478	3785	16286	9023	0.833333	0.0222891	C3	Sertoli cells	19596	0.601621
P2#alignments.possorted.tagged_BC00536_N03	P2	10.152	1010	4190	634	0.128868	2.12635	1463	5200	16257	9594	2.33333	0.0194993	C8	Innate lymph	8384	0.257858
P2#alignments.possorted.tagged_BC00207_N01	P2	14.969	2094	8616	621	0.265582	4.08495	3808	3190	16221	9223	0.733333	0.0191419	C6	Stroma	15161	0.467326
P2#alignments.possorted.tagged_BC00202_N01	P2	22.763	2437	8940	756	0.275722	3.22408	4082	3838	16212	8292	0.133333	0.0233161	C3	Sertoli cells	15285	0.47141
P2#alignments.possorted.tagged_BC00384_N02	P2	18.226	2568	9435	721	0.291294	3.89275	4043	3310	16195	8842	1.43333	0.02226	C6	Stroma	17589	0.543038
P2#alignments.possorted.tagged_BC00228_N02	P2	21.481	3135	11744	756	0.362671	3.30383	3413	3762	16191	9016	3.36667	0.0233463	C3	Sertoli cells	19626	0.606077
P2#alignments.possorted.tagged_BC01039_N03	P2	18.854	2885	10971	671	0.338799	2.57496	2579	4529	16191	9083	2.53333	0.0207214	C7	Stroma	17483	0.539899
P2#alignments.possorted.tagged_BC00465_N02	P2	18.002	2600	9513	720	0.293811	3.92067	3966	3290	16189	8933	0.0333333	0.0222373	C3	Sertoli cells	17657	0.545339
P2#alignments.possorted.tagged_BC00221_N01	P2	20.706	2656	9953	706	0.307856	3.95707	4521	3261	16165	8383	0.233333	0.0218373	C3	Sertoli cells	17849	0.552088
P2#alignments.possorted.tagged_BC00728_N02	P2	17.533	2550	9437	658	0.292095	3.84233	4129	3336	16154	8689	5.3	0.0203665	C5	PTM	18405	0.569673
P2#alignments.possorted.tagged_BC01781_N04	P2	20.656	2733	9904	657	0.306834	3.73146	3901	3411	16139	8827	0.466667	0.0203544	C3	Sertoli cells	17641	0.546533
P2#alignments.possorted.tagged_BC00681_N02	P2	20.049	2683	9947	699	0.308186	3.34635	3612	3713	16138	8813	0.333333	0.021657	C3	Sertoli cells	18049	0.559208
P2#alignments.possorted.tagged_BC00635_N02	P2	19.072	2745	9984	696	0.309351	3.20125	3402	3841	16137	8894	0.766667	0.0215653	C3	Sertoli cells	18180	0.563302
P2#alignments.possorted.tagged_BC01054_N03	P2	24.941	3111	10960	734	0.340098	2.74286	2066	4305	16113	9742	0.5	0.0227766	C3	Sertoli cells	19199	0.595761
P2#alignments.possorted.tagged_BC00596_N02	P2	23.44	2912	10713	662	0.332743	3.32626	3633	3721	16098	8744	0.833333	0.0205616	C3	Sertoli cells	18369	0.570537
P2#alignments.possorted.tagged_BC01181_N03	P2	23.271	3032	11089	718	0.344464	3.33738	3676	3711	16096	8709	0.633333	0.0223037	C3	Sertoli cells	19675	0.611177
P2#alignments.possorted.tagged_BC00636_N02	P2	21.34	2748	10488	738	0.326201	2.94988	3560	4070	16076	8446	3.53333	0.0229535	C5	PTM	19601	0.609635
P2#alignments.possorted.tagged_BC00791_N02	P2	19.734	2611	9626	664	0.299465	4.00685	4330	3210	16072	8532	3.03333	0.020657	C5	PTM	18204	0.566327
P2#alignments.possorted.tagged_BC01832_N03	P2	12.97	1179	5104	967	0.158993	6.77288	2677	2065	16051	11309	0.1	0.0301227	C2	Germ cells	11272	0.351131
P2#alignments.possorted.tagged_BC00840_N02	P2	14.332	1462	6068	812	0.189176	7.43218	3608	1902	16038	10528	0.366667	0.0253149	C2	Germ cells	12442	0.387891
P2#alignments.possorted.tagged_BC00214_N01	P2	22.674	3000	10817	742	0.338624	3.02825	3221	3965	15972	8786	4.8	0.0232281	C6	Stroma	18848	0.590033
P2#alignments.possorted.tagged_BC00458_N02	P2	16.333	2128	8095	708	0.253969	3.89015	3934	3259	15937	8744	0.1	0.0222125	C3	Sertoli cells	16402	0.514589
P2#alignments.possorted.tagged_BC01536_N03	P2	22.603	2865	10186	608	0.319872	3.28356	3082	3717	15922	9123	4.1	0.0190931	C5	PTM	18481	0.580361
P2#alignments.possorted.tagged_BC00444_N02	P2	24.025	2839	10397	702	0.326539	3.78941	3552	3324	15920	9044	1.26667	0.0220477	C3	Sertoli cells	18246	0.573053
P2#alignments.possorted.tagged_BC00215_N01	P2	20.39	2739	9900	720	0.311399	3.91528	4397	3234	15896	8265	0.3	0.0226472	C3	Sertoli cells	17905	0.563192
P2#alignments.possorted.tagged_BC02608_N05	P2	28.494	3842	12408	717	0.390385	2.46231	1063	4590	15892	10239	4.53333	0.0225585	C3	Sertoli cells	20621	0.648786
P2#alignments.possorted.tagged_BC01257_N03	P2	23.601	2920	10030	665	0.316164	1.72029	832	5831	15862	9199	2.6	0.020962	C3	Sertoli cells	15879	0.500536
P2#alignments.possorted.tagged_BC00233_N01	P2	19.321	2449	9035	632	0.28498	4.47187	4473	2897	15852	8482	0.1	0.0199344	C3	Sertoli cells	17383	0.54829
P2#alignments.possorted.tagged_BC00954_N03	P2	17.844	2460	9640	634	0.304197	3.34705	3409	3645	15845	8791	4.6	0.0200063	C6	Stroma	17922	0.565541
P2#alignments.possorted.tagged_BC00363_N02	P2	18.248	2783	10468	648	0.330973	3.45967	2585	3546	15814	9683	3.96667	0.0204882	C6	Stroma	18226	0.576262
P2#alignments.possorted.tagged_BC00238_N01	P2	23.788	2739	10250	599	0.325046	3.55299	3782	3463	15767	8522	0.633333	0.0189954	C3	Sertoli cells	18128	0.574872
P2#alignments.possorted.tagged_BC00770_N02	P2	19.914	2675	10150	617	0.321997	4.04837	3890	3122	15761	8749	1.76667	0.0195736	C6	Stroma	18810	0.596726
P2#alignments.possorted.tagged_BC00733_N02	P2	20.42	2743	10195	630	0.324042	4.16278	3874	3047	15731	8810	4.66667	0.0200242	C6	Stroma	18324	0.582417
P2#alignments.possorted.tagged_BC00343_N02	P2	23.85	3011	10746	664	0.342077	3.77852	3830	3287	15707	8590	0.433333	0.0211371	C3	Sertoli cells	18245	0.580792
P2#alignments.possorted.tagged_BC01025_N03	P2	21.287	2666	9753	616	0.31114	3.77253	3314	3284	15673	9075	2.4	0.0196516	C5	PTM	18604	0.593505
P2#alignments.possorted.tagged_BC00236_N01	P2	17.033	2417	9141	684	0.291914	3.92204	4237	3181	15657	8239	2.76667	0.0218433	C5	PTM	17033	0.543942
P2#alignments.possorted.tagged_BC01477_N03	P2	20.923	2631	9682	663	0.309725	3.81516	3730	3246	15630	8654	2.93333	0.0212092	C5	PTM	18419	0.589219
P2#alignments.possorted.tagged_BC00813_N03	P2	4.662	452	1981	586	0.0633839	1.89926	544	5390	15627	9693	0.0333333	0.0187496	C8	Innate lymph	4303	0.137678
P2#alignments.possorted.tagged_BC00283_N02	P2	8.198	1006	4201	712	0.134458	1.26669	1625	6892	15622	7105	2.8	0.0227884	C8	Stroma	7939	0.254097
P2#alignments.possorted.tagged_BC00666_N02	P2	17.558	2332	8986	675	0.288161	4.23925	3782	2976	15592	8834	0.4	0.0216457	C3	Sertoli cells	15986	0.512635
P2#alignments.possorted.tagged_BC01317_N03	P2	17.874	2717	9977	777	0.320866	3.46496	3314	3482	15547	8751	0.366667	0.0249887	C3	Sertoli cells	17393	0.559368
P2#alignments.possorted.tagged_BC01165_N03	P2	21.039	3198	11782	684	0.379501	2.75224	2583	4137	15523	8803	4.66667	0.0220318	C6	Stroma	18694	0.602139
P2#alignments.possorted.tagged_BC00626_N02	P2	17.983	2452	9342	672	0.301122	4.35266	4413	2898	15512	8201	2.36667	0.0216606	C6	Stroma	18275	0.58906
P2#alignments.possorted.tagged_BC00246_N01	P2	19.968	2884	10041	672	0.324385	3.55608	3294	3397	15477	8786	4.5	0.0217096	C6	Stroma	17857	0.576888
P2#alignments.possorted.tagged_BC00817_N02	P2	15.733	2312	8817	767	0.285303	3.5514	3764	3395	15452	8293	0.133333	0.0248188	C3	Sertoli cells	17081	0.552712
P2#alignments.possorted.tagged_BC01591_N04	P2	13.409	1185	4654	661	0.150781	3.56058	879	3384	15433	11170	0.533333	0.0214151	C8	Macrophages	8524	0.276161
P2#alignments.possorted.tagged_BC00797_N02	P2	21.411	2422	9142	631	0.296414	4.30478	4444	2907	15421	8070	2.96667	0.0204591	C6	Stroma	16866	0.546852
P2#alignments.possorted.tagged_BC00234_N01	P2	22.59	2544	9470	630	0.307487	3.80019	4175	3208	15399	8016	2.9	0.0204559	C5	PTM	17809	0.578252
P2#alignments.possorted.tagged_BC00249_N01	P2	13.415	1863	7377	563	0.2397	3.52988	3959	3397	15388	8032	0.133333	0.0182935	C3	Sertoli cells	14452	0.469587
P2#alignments.possorted.tagged_BC01091_N03	P2	21.591	3042	10870	679	0.353519	3.56066	2769	3371	15374	9234	4.76667	0.0220827	C6	Stroma	18409	0.598706
P2#alignments.possorted.tagged_BC01756_N03	P2	20.262	2732	9978	663	0.324699	2.66706	1539	4190	15365	9636	3.03333	0.021575	C4	Leydig cells	17729	0.576928
P2#alignments.possorted.tagged_BC00714_N02	P2	13.469	1510	5445	582	0.177246	1.35186	918	6531	15360	7911	0.8	0.0189453	C6	Stroma	9740	0.317057
P2#alignments.possorted.tagged_BC02474_N04	P2	23.298	3459	12236	658	0.399582	2.48373	1576	4395	15311	9340	5.46667	0.0214878	C6	Stroma	19996	0.652995
P2#alignments.possorted.tagged_BC00750_N02	P2	21.846	2736	10122	665	0.330611	2.85689	3203	3969	15308	8136	0.366667	0.0217207	C3	Sertoli cells	17444	0.569767
P2#alignments.possorted.tagged_BC00792_N02	P2	19.025	2719	10070	683	0.329042	3.91552	3457	3113	15302	8732	5.7	0.0223173	C6	Stroma	18022	0.588877
P2#alignments.possorted.tagged_BC00924_N02	P2	19.369	2504	9113	710	0.2982	3.61771	4112	3309	15280	7859	0.4	0.023233	C3	Sertoli cells	16015	0.524051
P2#alignments.possorted.tagged_BC00707_N02	P2	13.425	1322	5135	671	0.168118	2.9534	3315	3863	15272	8094	0.266667	0.0219683	C3	Sertoli cells	10176	0.333159
P2#alignments.possorted.tagged_BC01383_N03	P2	19.429	2551	9623	592	0.315074	3.15877	3470	3672	15271	8129	5.06667	0.0193831	C8	Innate lymph	17800	0.582804
P2#alignments.possorted.tagged_BC00235_N01	P2	6.133	573	2786	761	0.0913802	4.28938	5497	2882	15244	6865	0.1	0.0249606	C1	Neutrophils	5154	0.16905
P2#alignments.possorted.tagged_BC00842_N02	P2	16.879	1969	7556	574	0.248536	3.97904	3789	3053	15201	8359	0.0333333	0.0188803	C3	Sertoli cells	15729	0.517367
P2#alignments.possorted.tagged_BC03407_N05	P2	32.194	3658	12251	774	0.403312	2.36092	1152	4519	15188	9517	4.83333	0.0254806	C8	Innate lymph	19838	0.653081
P2#alignments.possorted.tagged_BC00243_N01	P2	17.541	2250	8677	604	0.285785	3.84242	3991	3135	15181	8055	0.233333	0.0198933	C3	Sertoli cells	16777	0.552566
P2#alignments.possorted.tagged_BC01743_N03	P2	18.296	2624	9594	620	0.316216	4.17747	3183	2930	15170	9057	4.9	0.0204351	C6	Stroma	17217	0.567469
P2#alignments.possorted.tagged_BC00247_N01	P2	19.075	2360	9364	622	0.308819	3.23137	3496	3583	15161	8082	3.86667	0.0205132	C6	Stroma	16572	0.546534
P2#alignments.possorted.tagged_BC00269_N01	P2	16.993	2317	8887	588	0.2933	4.05168	3935	2999	15150	8216	0.133333	0.0194059	C3	Sertoli cells	16064	0.530165
P2#alignments.possorted.tagged_BC01304_N04	P2	30.066	3978	13277	701	0.438445	1.15991	471	7010	15141	7660	1.8	0.0231491	C9	Endothelial cells	20456	0.675517
P2#alignments.possorted.tagged_BC00538_N02	P2	20.38	2573	9387	673	0.310581	3.72989	2760	3195	15112	9157	0.366667	0.0222671	C3	Sertoli cells	16314	0.53977
P2#alignments.possorted.tagged_BC00764_N02	P2	18.208	2216	8381	561	0.277572	3.56793	3645	3305	15097	8147	1.76667	0.0185799	C5	PTM	16337	0.541068
P2#alignments.possorted.tagged_BC00248_N01	P2	16.069	2118	8276	773	0.274403	3.17497	3382	3612	15080	8086	4.8	0.02563	C8	Neutrophils	14616	0.484615
P2#alignments.possorted.tagged_BC00262_N01	P2	22.13	2291	8538	621	0.283128	3.671	3945	3228	15078	7905	3.06667	0.0205929	C5	PTM	16635	0.551632
P2#alignments.possorted.tagged_BC01384_N03	P2	12.061	1206	5034	905	0.167109	8.52688	3772	1581	15062	9709	0	0.0300425	C2	Germ cells	10938	0.363099
P2#alignments.possorted.tagged_BC00672_N02	P2	22.009	2712	9974	602	0.33112	4.3144	4040	2834	15061	8187	4.16667	0.0199854	C6	Stroma	17420	0.578315
P2#alignments.possorted.tagged_BC00265_N01	P2	22.105	2467	9579	664	0.318599	4.15358	4190	2917	15033	7926	3.66667	0.0220847	C6	Stroma	17280	0.574736
P2#alignments.possorted.tagged_BC00288_N01	P2	9.241	812	3361	638	0.111899	6.20288	4788	2085	15018	8145	0.466667	0.0212412	C6	Stroma	6896	0.229591
P2#alignments.possorted.tagged_BC00527_N02	P2	23.639	2304	8484	705	0.282913	3.4946	4044	3336	14994	7614	0.966667	0.0235094	C5	PTM	15040	0.501534
P2#alignments.possorted.tagged_BC00876_N02	P2	20.05	2268	8349	611	0.280111	3.60965	3686	3233	14903	7984	0.866667	0.0204992	C5	PTM	16433	0.551332
P2#alignments.possorted.tagged_BC01748_N05	P2	7.261	506	2020	692	0.0678718	0.884864	107	7895	14881	6879	0.2	0.0232511	C8	Stroma	5007	0.168235
P2#alignments.possorted.tagged_BC00266_N01	P2	19.26	2558	9513	755	0.319743	2.88509	2233	3829	14876	8814	3.06667	0.0253764	C7	Innate lymph	16466	0.553442
P2#alignments.possorted.tagged_BC01856_N03	P2	18.341	2297	8554	636	0.287645	3.23016	2444	3515	14869	8910	1.3	0.0213868	C5	PTM	17125	0.575863
P2#alignments.possorted.tagged_BC01631_N03	P2	21.862	2727	10180	646	0.342484	3.70019	3232	3162	14862	8468	4.53333	0.0217333	C6	Stroma	18111	0.609306
P2#alignments.possorted.tagged_BC00271_N01	P2	17.507	2502	9110	591	0.306672	4.2061	3983	2853	14853	8017	4.43333	0.019895	C6	Stroma	16101	0.542012
P2#alignments.possorted.tagged_BC00232_N01	P2	22.18	2677	9528	726	0.320851	3.35937	3956	3406	14848	7486	2.73333	0.0244477	C1	Neutrophils	13875	0.467235
P2#alignments.possorted.tagged_BC00263_N01	P2	21.181	2503	9439	632	0.318455	3.42124	3106	3352	14820	8362	2.66667	0.0213225	C6	Stroma	16681	0.562787
P2#alignments.possorted.tagged_BC00986_N02	P2	18.477	2342	8868	596	0.300041	3.10272	3064	3602	14778	8112	0.3	0.0201651	C3	Sertoli cells	16691	0.564725
P2#alignments.possorted.tagged_BC02137_N04	P2	11.711	1171	4739	654	0.160372	0.513522	143	9762	14775	4870	0.766667	0.022132	C8	Innate lymph	9631	0.325922
P2#alignments.possorted.tagged_BC00903_N02	P2	24.999	3194	10892	664	0.36877	2.76927	1127	3918	14768	9723	5.1	0.022481	C6	Leydig cells	18569	0.62869
P2#alignments.possorted.tagged_BC01322_N03	P2	24.711	2970	10406	688	0.352507	3.37852	2352	3371	14760	9037	0.266667	0.0233062	C3	Sertoli cells	16972	0.574932
P2#alignments.possorted.tagged_BC00279_N01	P2	23	2776	10401	674	0.352385	3.59322	3346	3213	14758	8199	1.63333	0.0228351	C6	Stroma	17991	0.609534
P2#alignments.possorted.tagged_BC00504_N02	P2	22.837	2641	9672	719	0.327931	3.54733	3084	3243	14747	8420	0.1	0.0243778	C3	Sertoli cells	16808	0.569879
P2#alignments.possorted.tagged_BC01319_N03	P2	18.19	2471	9320	661	0.316018	4.02419	3133	2935	14746	8678	4.3	0.0224129	C6	Stroma	16854	0.571477
P2#alignments.possorted.tagged_BC00818_N02	P2	14.455	1241	4968	589	0.168796	2.2724	1304	4497	14716	8915	1.13333	0.0200122	C5	PTM	9589	0.325802
P2#alignments.possorted.tagged_BC00267_N01	P2	19.049	2251	8489	621	0.289076	2.70315	2943	3965	14683	7775	2.93333	0.0211469	C5	PTM	15680	0.533951
P2#alignments.possorted.tagged_BC00688_N02	P2	5.966	696	3161	693	0.107708	1.78127	1219	5276	14674	8179	0	0.0236132	C3	Sertoli cells	6679	0.227579
P2#alignments.possorted.tagged_BC00519_N02	P2	16.776	2567	10285	649	0.351288	3.2297	3201	3461	14639	7977	2.8	0.0221668	C6	Stroma	17595	0.600963
P2#alignments.possorted.tagged_BC00737_N02	P2	27.505	2903	10323	741	0.352706	3.58315	3662	3193	14634	7779	0.266667	0.0253178	C3	Sertoli cells	17166	0.586511
P2#alignments.possorted.tagged_BC02953_N05	P2	21.462	2547	8705	605	0.297872	3.10334	2066	3561	14612	8985	5.23333	0.0207022	C6	Stroma	16169	0.553278
P2#alignments.possorted.tagged_BC00701_N02	P2	25.829	3274	11692	660	0.400603	2.77568	2524	3865	14593	8204	3.36667	0.0226136	C9	Endothelial cells	17423	0.596964
P2#alignments.possorted.tagged_BC00565_N02	P2	22.445	2641	9552	587	0.328926	3.71735	3606	3078	14520	7836	2.13333	0.0202135	C6	Stroma	17315	0.596247
P2#alignments.possorted.tagged_BC00275_N01	P2	20.427	2517	9480	656	0.327371	3.04216	2939	3582	14479	7958	2.76667	0.0226535	C5	PTM	17133	0.59165
P2#alignments.possorted.tagged_BC00751_N02	P2	19.454	2122	8103	598	0.280245	3.93581	3521	2929	14457	8007	1.8	0.020682	C5	PTM	16175	0.559418
P2#alignments.possorted.tagged_BC00694_N02	P2	19.288	2328	8965	626	0.311263	4.10312	3979	2822	14401	7600	1.66667	0.0217346	C6	Stroma	16454	0.57128
P2#alignments.possorted.tagged_BC01459_N04	P2	20.653	2305	8772	621	0.304922	3.87098	3239	2953	14384	8192	3.43333	0.0215865	C6	Stroma	16447	0.571712
P2#alignments.possorted.tagged_BC00919_N03	P2	24.207	3105	11557	771	0.402711	2.83151	2882	3745	14349	7722	3.4	0.026866	C6	Stroma	17096	0.595721
P2#alignments.possorted.tagged_BC01587_N03	P2	18.471	2360	8681	615	0.303235	3.8654	3399	2942	14314	7973	0.2	0.0214825	C3	Sertoli cells	15528	0.542406
P2#alignments.possorted.tagged_BC00231_N01	P2	16.505	1742	6754	712	0.236236	1.77411	1407	5153	14295	7735	5.1	0.0249038	C8	Stroma	11161	0.390381
P2#alignments.possorted.tagged_BC00289_N01	P2	22.155	2439	8917	595	0.311892	3.43531	3505	3223	14295	7567	0.266667	0.0208115	C3	Sertoli cells	15092	0.527877
P2#alignments.possorted.tagged_BC01169_N02	P2	21.8	2466	9066	695	0.317148	4.33919	3692	2677	14293	7924	5.13333	0.0243126	C6	Stroma	16482	0.576576
P2#alignments.possorted.tagged_BC01201_N02	P2	27.488	3040	10520	626	0.368528	3.15638	1810	3434	14273	9029	3	0.0219295	C3	Sertoli cells	17678	0.619281
P2#alignments.possorted.tagged_BC02015_N03	P2	18.767	2502	9166	694	0.321231	3.44871	3130	3207	14267	7930	5.43333	0.0243219	C8	Neutrophils	15871	0.556214
P2#alignments.possorted.tagged_BC00311_N01	P2	17.915	2307	8692	633	0.30479	4.33446	3966	2673	14259	7620	0.2	0.0221965	C3	Sertoli cells	15766	0.552844
P2#alignments.possorted.tagged_BC00338_N02	P2	18.293	2328	8871	641	0.311438	3.36737	3197	3261	14242	7784	5.7	0.0225039	C8	Innate lymph	15867	0.55705
P2#alignments.possorted.tagged_BC01622_N04	P2	21.664	2746	9961	625	0.349705	3.52271	2445	3149	14242	8648	4.73333	0.0219421	C6	Stroma	17199	0.603813
P2#alignments.possorted.tagged_BC00302_N01	P2	17.154	2131	8352	566	0.293568	3.86824	3790	2922	14225	7513	3.8	0.0198946	C8	Stroma	14688	0.516274
P2#alignments.possorted.tagged_BC01666_N03	P2	18.075	2282	8435	614	0.297133	3.86096	3596	2920	14194	7678	2.96667	0.0216289	C8	Neutrophils	15771	0.555552
P2#alignments.possorted.tagged_BC01178_N03	P2	19.794	2429	9198	589	0.324834	3.21369	2788	3360	14158	8010	2.03333	0.020801	C5	PTM	16974	0.599449
P2#alignments.possorted.tagged_BC00746_N02	P2	17.913	2560	9204	589	0.325322	3.89481	3503	2890	14146	7753	0.1	0.0208186	C3	Sertoli cells	16586	0.586243
P2#alignments.possorted.tagged_BC00300_N01	P2	14.496	1918	7523	513	0.266075	4.32467	4206	2655	14137	7276	0.166667	0.0181439	C3	Sertoli cells	13977	0.494341
P2#alignments.possorted.tagged_BC00753_N02	P2	26.265	2865	10438	610	0.369513	3.34451	3106	3251	14124	7767	2.83333	0.0215944	C6	Stroma	17175	0.608008
P2#alignments.possorted.tagged_BC01219_N02	P2	19.608	2119	8007	569	0.283474	3.71553	3197	2995	14123	7931	2.93333	0.0201444	C6	Stroma	15407	0.545458
P2#alignments.possorted.tagged_BC00296_N01	P2	23.965	2481	8947	615	0.31682	3.63559	3402	3046	14120	7672	3.9	0.0217776	C6	Stroma	16238	0.575
P2#alignments.possorted.tagged_BC00314_N01	P2	13.694	1722	6998	582	0.24791	4.24684	3411	2690	14114	8013	0.1	0.0206178	C3	Sertoli cells	13687	0.484873
P2#alignments.possorted.tagged_BC03041_N05	P2	19.367	2005	7269	710	0.257583	3.91809	808	2869	14110	10433	3.03333	0.0251595	C2	Germ cells	14375	0.509391
P2#alignments.possorted.tagged_BC00929_N02	P2	17.011	2225	8340	541	0.295682	3.63001	3359	3046	14103	7698	5.66667	0.0191803	C6	Stroma	15053	0.533681
P2#alignments.possorted.tagged_BC00316_N01	P2	20.322	2073	7638	607	0.270851	4.61753	3781	2510	14100	7809	0.133333	0.0215248	C3	Sertoli cells	14407	0.510887
P2#alignments.possorted.tagged_BC00442_N02	P2	22.945	2526	9043	599	0.321129	3.44304	2891	3169	14080	8020	5.36667	0.0212713	C5	PTM	16514	0.586435
P2#alignments.possorted.tagged_BC00318_N01	P2	19.577	2432	9051	562	0.321665	4.63888	3912	2495	14069	7662	0.266667	0.019973	C3	Sertoli cells	15931	0.566174
P2#alignments.possorted.tagged_BC00785_N02	P2	19.441	2425	8869	598	0.315331	3.24607	2960	3312	14063	7791	2.13333	0.0212615	C6	Stroma	15604	0.554789
P2#alignments.possorted.tagged_BC00848_N02	P2	19.552	2192	8150	542	0.290118	3.48897	2814	3129	14046	8103	3.03333	0.0192937	C4	Leydig cells	14983	0.533355
P2#alignments.possorted.tagged_BC00317_N01	P2	21.225	2551	9425	581	0.335672	3.63333	3436	3030	14039	7573	5.7	0.0206924	C6	Stroma	16594	0.590997
P2#alignments.possorted.tagged_BC02037_N04	P2	24.861	2988	10199	664	0.363316	2.52221	1523	3985	14036	8528	2.46667	0.0236535	C8	Innate lymph	16256	0.579082
P2#alignments.possorted.tagged_BC00734_N03	P2	23.694	2788	9994	605	0.356216	2.26157	1675	4301	14028	8052	4.6	0.021564	C9	Endothelial cells	16554	0.590034
P2#alignments.possorted.tagged_BC01940_N03	P2	26.202	2911	10117	651	0.361528	3.02763	2329	3474	13992	8189	4.76667	0.0232633	C6	Stroma	17427	0.622749
P2#alignments.possorted.tagged_BC00936_N02	P2	19.949	2307	8512	563	0.304196	4.68278	3666	2462	13991	7863	4.1	0.0201201	C5	PTM	16679	0.596062
P2#alignments.possorted.tagged_BC01344_N02	P2	13.641	930	4102	687	0.146699	7.28258	2621	1688	13981	9672	0	0.0245691	C2	Germ cells	9143	0.326979
P2#alignments.possorted.tagged_BC01593_N04	P2	21.507	2422	9021	573	0.32287	4.07078	3280	2755	13970	7935	4	0.0205082	C6	Stroma	15894	0.568862
P2#alignments.possorted.tagged_BC00355_N02	P2	22.466	2564	9345	634	0.334491	4.1019	3732	2738	13969	7499	4.23333	0.0226931	C5	Stroma	16405	0.587193
P2#alignments.possorted.tagged_BC00306_N01	P2	20.266	1965	7277	518	0.260526	3.93673	3950	2829	13966	7187	0.733333	0.018545	C5	PTM	14362	0.514177
P2#alignments.possorted.tagged_BC01013_N02	P2	21.139	2562	9519	680	0.341109	3.03033	2657	3462	13953	7834	4.7	0.0243675	C8	Macrophages	16240	0.581954
P2#alignments.possorted.tagged_BC01335_N04	P2	22.201	2702	9640	625	0.345495	3.71318	2479	2960	13951	8512	5.1	0.0223998	C6	Stroma	16646	0.596588
P2#alignments.possorted.tagged_BC00542_N02	P2	19.317	1912	7187	532	0.258098	4.21852	3254	2668	13923	8001	0.0333333	0.0191051	C3	Sertoli cells	14437	0.518459
P2#alignments.possorted.tagged_BC01209_N03	P2	16.024	1408	5758	740	0.206988	3.72132	1060	2946	13909	9903	4.53333	0.0266015	C2	Germ cells	11687	0.420124
P2#alignments.possorted.tagged_BC00322_N01	P2	23.489	2491	9115	705	0.327996	4.05089	3825	2751	13895	7319	0.466667	0.0253688	C3	Sertoli cells	15797	0.568442
P2#alignments.possorted.tagged_BC00299_N01	P2	14.754	1885	7339	533	0.264183	2.91268	2986	3550	13890	7354	1.16667	0.0191865	C3	Sertoli cells	13610	0.489921
P2#alignments.possorted.tagged_BC00678_N02	P2	18.896	2023	7204	538	0.259697	4.0713	3040	2735	13870	8095	0.3	0.0193944	C6	Stroma	13970	0.503605
P2#alignments.possorted.tagged_BC03281_N05	P2	12.794	1415	5575	788	0.20106	5.47548	416	2141	13864	11307	1.26667	0.0284189	C2	Germ cells	11863	0.427835
P2#alignments.possorted.tagged_BC00287_N01	P2	22.915	1840	6730	653	0.24275	2.40506	2495	4071	13862	7296	1.83333	0.0235536	C8	Macrophages	11604	0.418554
P2#alignments.possorted.tagged_BC01103_N02	P2	22.661	2655	9622	567	0.347515	3.71847	3444	2934	13844	7466	2.6	0.0204782	C6	Stroma	16444	0.593903
P2#alignments.possorted.tagged_BC00324_N01	P2	19.701	2348	8855	558	0.320091	4.17858	4060	2671	13832	7101	3.36667	0.0201706	C5	PTM	16361	0.591418
P2#alignments.possorted.tagged_BC03113_N04	P2	23.258	3089	10735	612	0.388386	2.71605	1704	3719	13820	8397	0.466667	0.0221418	C3	Sertoli cells	17914	0.648119
P2#alignments.possorted.tagged_BC02000_N03	P2	16.035	1579	6106	681	0.221088	5.83952	2217	2019	13809	9573	2.26667	0.0246578	C2	Germ cells	12002	0.434572
P2#alignments.possorted.tagged_BC01160_N03	P2	22.092	2421	9082	562	0.329082	3.26817	2704	3233	13799	7862	2.9	0.0203638	C5	PTM	16528	0.598884
P2#alignments.possorted.tagged_BC01345_N03	P2	21.131	2273	8509	605	0.308901	4.07667	3015	2713	13773	8045	0.133333	0.0219633	C3	Sertoli cells	15159	0.550316
P2#alignments.possorted.tagged_BC00525_N02	P2	19.032	2249	8445	562	0.307091	3.46574	2941	3079	13750	7730	3.66667	0.0204364	C8	Innate lymph	15629	0.568327
P2#alignments.possorted.tagged_BC00308_N01	P2	19.098	2170	8265	528	0.300611	3.52651	3641	3037	13747	7069	0.0333333	0.0192042	C3	Sertoli cells	15475	0.56285
P2#alignments.possorted.tagged_BC01029_N02	P2	23.401	2399	8830	661	0.321301	3.2241	2864	3253	13741	7624	0.0333333	0.0240521	C3	Sertoli cells	15614	0.568154
P2#alignments.possorted.tagged_BC00414_N02	P2	23.356	2701	10044	676	0.365662	3.32023	2889	3179	13734	7666	0.2	0.0246105	C3	Sertoli cells	17026	0.619849
P2#alignments.possorted.tagged_BC00614_N02	P2	20.394	2204	8776	540	0.319732	2.94595	2852	3478	13724	7394	5.13333	0.0196736	C4	Leydig cells	15903	0.579386
P2#alignments.possorted.tagged_BC01782_N03	P2	20.833	2546	9230	576	0.336321	3.97715	3252	2757	13722	7713	0.4	0.0209882	C3	Sertoli cells	16577	0.60403
P2#alignments.possorted.tagged_BC01283_N03	P2	18.57	2110	7993	540	0.291396	4.09473	2100	2692	13715	8923	1.03333	0.0196865	C6	Stroma	14154	0.516004
P2#alignments.possorted.tagged_BC01613_N03	P2	22.659	2712	9403	638	0.34325	3.90229	2651	2794	13697	8252	0.266667	0.0232898	C3	Sertoli cells	16355	0.597029
P2#alignments.possorted.tagged_BC01995_N03	P2	25.708	2259	7916	508	0.288989	2.67579	2016	3726	13696	7954	0.1	0.0185456	C3	Sertoli cells	14252	0.520298
P2#alignments.possorted.tagged_BC00664_N02	P2	18.199	2077	7853	596	0.286899	3.5742	3350	2992	13686	7344	1	0.0217741	C5	PTM	14437	0.527437
P2#alignments.possorted.tagged_BC02138_N03	P2	15.516	1622	6499	705	0.237571	5.52888	2039	2095	13678	9544	3.93333	0.0257713	C2	Germ cells	12521	0.457706
P2#alignments.possorted.tagged_BC00323_N01	P2	17.362	1622	6507	529	0.237916	3.91023	3033	2785	13675	7857	0.233333	0.0193419	C6	Stroma	14430	0.527605
P2#alignments.possorted.tagged_BC01229_N02	P2	25.661	2838	9923	588	0.363134	3.33333	2869	3153	13663	7641	0.766667	0.021518	C3	Sertoli cells	16488	0.603381
P2#alignments.possorted.tagged_BC02282_N04	P2	15.176	1732	6950	580	0.254411	3.38914	2870	3112	13659	7677	0	0.0212314	C3	Sertoli cells	13723	0.502343
P2#alignments.possorted.tagged_BC01590_N03	P2	20.683	2183	8331	578	0.305344	4.10172	3440	2674	13642	7528	4.5	0.0211846	C6	Stroma	14946	0.547794
P2#alignments.possorted.tagged_BC00327_N01	P2	21.048	2094	8005	548	0.293761	3.53411	2988	3005	13625	7632	1.6	0.0201101	C5	PTM	15518	0.569468
P2#alignments.possorted.tagged_BC00922_N02	P2	22.678	2634	9631	642	0.353639	3.80148	3353	2836	13617	7428	3.63333	0.0235735	C6	Stroma	16033	0.588713
P2#alignments.possorted.tagged_BC00488_N02	P2	17.652	1979	7445	545	0.273432	4.28699	3572	2575	13614	7467	1.06667	0.0200162	C5	PTM	14732	0.541061
P2#alignments.possorted.tagged_BC00334_N01	P2	17.524	2177	8355	546	0.306943	3.75044	3296	2865	13610	7449	2.2	0.0200588	C6	Stroma	14399	0.528986
P2#alignments.possorted.tagged_BC00331_N01	P2	18.567	2391	8978	549	0.330098	3.50746	3120	3017	13599	7462	1.86667	0.0201853	C6	Stroma	15572	0.572542
P2#alignments.possorted.tagged_BC00535_N02	P2	13.489	1594	6349	471	0.233471	3.6597	2983	2918	13597	7696	0.7	0.01732	C6	Stroma	12633	0.464551
P2#alignments.possorted.tagged_BC01037_N02	P2	21.314	2368	8557	601	0.314804	4.17555	2859	2626	13591	8106	0.533333	0.0221102	C3	Sertoli cells	14623	0.537966
P2#alignments.possorted.tagged_BC02057_N03	P2	16.484	1823	7073	579	0.260496	4.5187	2564	2460	13576	8552	0.733333	0.0213244	C6	Stroma	13109	0.482801
P2#alignments.possorted.tagged_BC01860_N04	P2	23.515	2755	10035	642	0.369722	3.42196	2149	3069	13571	8353	2.46667	0.0236534	C5	PTM	17260	0.635915
P2#alignments.possorted.tagged_BC01905_N03	P2	20.082	2292	8635	631	0.318588	3.42009	2510	3066	13552	7976	2.76667	0.0232807	C5	PTM	15415	0.568735
P2#alignments.possorted.tagged_BC00356_N01	P2	23.049	2293	8715	576	0.321705	4.09019	3193	2661	13545	7691	4.56667	0.0212625	C6	Stroma	15295	0.564599
P2#alignments.possorted.tagged_BC00376_N02	P2	20.377	2552	8995	560	0.332139	2.91358	2759	3460	13541	7322	3.6	0.0206779	C8	Vascular mural cells	15328	0.565985
P2#alignments.possorted.tagged_BC01888_N03	P2	17.335	2136	8143	583	0.300768	5.17564	2595	2192	13537	8750	1.33333	0.0215336	C8	Macrophages	12889	0.476066
P2#alignments.possorted.tagged_BC00969_N02	P2	19.378	2378	8814	610	0.325672	4.00074	3500	2706	13532	7326	0	0.0225392	C3	Sertoli cells	15506	0.572938
P2#alignments.possorted.tagged_BC00897_N02	P2	21.87	2242	8179	626	0.30315	3.41571	2386	3055	13490	8049	3.03333	0.0232024	C5	PTM	15638	0.579615
P2#alignments.possorted.tagged_BC01669_N03	P2	23.355	2406	8550	606	0.316901	4.01673	3376	2689	13490	7425	0.4	0.0224611	C3	Sertoli cells	15340	0.568569
P2#alignments.possorted.tagged_BC01926_N03	P2	22.673	2519	9022	652	0.334569	3.98816	2760	2703	13483	8020	1.96667	0.0241786	C3	Sertoli cells	15095	0.559779
P2#alignments.possorted.tagged_BC00339_N01	P2	19.004	2380	8747	589	0.324395	3.41743	1808	3052	13482	8622	1.56667	0.0218439	C7	Innate lymph	15245	0.565383
P2#alignments.possorted.tagged_BC01006_N02	P2	17.371	1851	7233	485	0.269426	3.57654	3528	2933	13423	6962	0.433333	0.018066	C5	PTM	14738	0.548983
P2#alignments.possorted.tagged_BC00346_N01	P2	14.317	1634	6463	495	0.241067	3.8376	2893	2771	13405	7741	0.333333	0.0184633	C6	Stroma	13174	0.491384
P2#alignments.possorted.tagged_BC00357_N01	P2	18.214	2088	7778	469	0.290376	4.15909	3246	2596	13393	7551	0.7	0.0175091	C6	Stroma	14035	0.523968
P2#alignments.possorted.tagged_BC00992_N02	P2	18.593	2000	7388	575	0.27629	4.47951	2809	2440	13370	8121	2.06667	0.0215034	C6	Stroma	14028	0.524607
P2#alignments.possorted.tagged_BC00344_N01	P2	23.742	2290	8389	545	0.314265	3.28063	2890	3118	13347	7339	4.46667	0.0204166	C5	PTM	15533	0.581891
P2#alignments.possorted.tagged_BC00351_N01	P2	17.228	2088	7804	544	0.292548	3.57564	3273	2915	13338	7150	3.86667	0.0203929	C5	PTM	14636	0.548658
P2#alignments.possorted.tagged_BC01898_N03	P2	29.239	3086	10297	590	0.386031	1.70857	717	4924	13337	7696	3.93333	0.0221189	C3	Sertoli cells	16931	0.634738
P2#alignments.possorted.tagged_BC00366_N01	P2	18.851	1942	7693	570	0.28882	3.63235	3470	2875	13318	6973	2.73333	0.0213996	C5	PTM	14072	0.528308
P2#alignments.possorted.tagged_BC01074_N02	P2	25.896	2707	9509	586	0.357078	3.55214	2901	2925	13315	7489	0.433333	0.0220053	C3	Sertoli cells	16060	0.603079
P2#alignments.possorted.tagged_BC02175_N04	P2	21.173	2363	8779	559	0.32979	2.63264	1376	3664	13310	8270	2.26667	0.0209992	C6	Stroma	15490	0.581893
P2#alignments.possorted.tagged_BC01502_N03	P2	25.383	2679	9659	569	0.363832	3.01391	2281	3307	13274	7686	0.466667	0.0214329	C3	Sertoli cells	16387	0.617259
P2#alignments.possorted.tagged_BC00370_N01	P2	18.637	2080	7706	566	0.290289	3.9693	3159	2671	13273	7443	0.433333	0.0213215	C5	PTM	14752	0.555715
P2#alignments.possorted.tagged_BC00677_N02	P2	21.61	2379	8374	543	0.315952	3.99887	2576	2651	13252	8025	0.533333	0.0204875	C3	Sertoli cells	15269	0.576102
P2#alignments.possorted.tagged_BC00911_N02	P2	16.232	1869	7680	540	0.289789	5.0068	3586	2206	13251	7459	2.33333	0.0203758	C6	Stroma	14277	0.538714
P2#alignments.possorted.tagged_BC01289_N02	P2	21.204	2238	8254	566	0.312131	4.20142	3358	2542	13222	7322	0.166667	0.0214037	C3	Sertoli cells	15285	0.578014
P2#alignments.possorted.tagged_BC01867_N03	P2	20.704	2478	8846	551	0.334518	3.35938	2975	3033	13222	7214	5.2	0.0208365	C6	Stroma	15868	0.600061
P2#alignments.possorted.tagged_BC00821_N02	P2	22.332	2436	8681	554	0.328378	4.03543	2974	2625	13218	7619	5.06667	0.0209563	C6	Stroma	15622	0.590937
P2#alignments.possorted.tagged_BC00335_N01	P2	12.975	2136	9535	725	0.360983	4.14291	3557	2568	13207	7082	0.0333333	0.0274476	C3	Sertoli cells	14678	0.55569
P2#alignments.possorted.tagged_BC01104_N02	P2	21.895	2532	9488	642	0.359421	3.08385	2707	3232	13199	7260	2.96667	0.02432	C6	Stroma	16110	0.610274
P2#alignments.possorted.tagged_BC02162_N03	P2	23.894	2546	8888	597	0.336871	3.08421	2467	3230	13192	7495	0.166667	0.0226273	C3	Sertoli cells	15420	0.584445
P2#alignments.possorted.tagged_BC00375_N01	P2	23.94	2563	8795	585	0.3337	3.85735	3345	2713	13178	7120	0.266667	0.0221961	C3	Sertoli cells	15241	0.578274
P2#alignments.possorted.tagged_BC00567_N02	P2	24.323	2604	9781	549	0.371195	2.93166	2886	3351	13175	6938	2.03333	0.0208349	C3	Sertoli cells	15681	0.595104
P2#alignments.possorted.tagged_BC01390_N03	P2	22.736	2503	8904	579	0.338169	3.33916	2668	3034	13165	7463	4.13333	0.0219901	C6	Stroma	15068	0.572275
P2#alignments.possorted.tagged_BC01599_N03	P2	28.53	2579	9006	599	0.342069	3.60441	2541	2859	13164	7764	0.2	0.0227514	C3	Sertoli cells	16202	0.61539
P2#alignments.possorted.tagged_BC00372_N01	P2	21.753	2219	8162	519	0.310059	3.42272	2965	2976	13162	7221	4.23333	0.0197158	C5	PTM	15200	0.57742
P2#alignments.possorted.tagged_BC00602_N02	P2	19.624	2210	8132	571	0.309014	4.24223	3036	2510	13158	7612	2.06667	0.0216978	C6	Stroma	15146	0.575543
P2#alignments.possorted.tagged_BC02027_N03	P2	25.049	2492	9102	522	0.346057	3.25323	2336	3092	13151	7723	3.06667	0.0198464	C6	Leydig cells	16079	0.611322
P2#alignments.possorted.tagged_BC02179_N03	P2	22.976	2541	9105	589	0.346171	3.93842	2999	2663	13151	7489	2.13333	0.0223937	C5	PTM	15726	0.597901
P2#alignments.possorted.tagged_BC00364_N01	P2	22.723	2318	8626	539	0.32806	3.26851	3386	3080	13147	6681	3.66667	0.020499	C8	Stroma	15594	0.593063
P2#alignments.possorted.tagged_BC00773_N02	P2	17.17	1977	7845	602	0.298994	3.9431	3120	2654	13119	7345	2.83333	0.0229438	C5	PTM	15235	0.580646
P2#alignments.possorted.tagged_BC01236_N02	P2	24.216	2348	8491	612	0.324257	4.10448	3119	2565	13093	7409	0.433333	0.0233713	C3	Sertoli cells	14685	0.560796
P2#alignments.possorted.tagged_BC00359_N01	P2	17.101	1969	7364	488	0.28124	3.30658	3686	3040	13092	6366	0.7	0.0186373	C5	PTM	13992	0.534372
P2#alignments.possorted.tagged_BC01227_N02	P2	23.624	2565	8547	613	0.326446	3.22427	3371	3099	13091	6621	2.16667	0.023413	C8	Macrophages	12528	0.478497
P2#alignments.possorted.tagged_BC01909_N03	P2	23.209	2895	10513	629	0.401535	2.78025	2258	3463	13091	7370	0.333333	0.0240241	C3	Sertoli cells	16418	0.627072
P2#alignments.possorted.tagged_BC01929_N04	P2	17.614	2117	7986	573	0.305345	3.65871	2268	2807	13077	8002	1.4	0.0219087	C6	Stroma	15678	0.599449
P2#alignments.possorted.tagged_BC00756_N02	P2	22.367	2372	8701	516	0.333116	3.84781	3392	2694	13060	6974	4.43333	0.019755	C7	Stroma	14964	0.572894
P2#alignments.possorted.tagged_BC00389_N01	P2	23.478	2229	8065	567	0.309336	4.68761	3353	2292	13036	7391	0.133333	0.0217475	C3	Sertoli cells	14184	0.544032
P2#alignments.possorted.tagged_BC01021_N02	P2	22.159	2473	8975	609	0.344265	3.25841	2455	3061	13035	7519	1.63333	0.0233602	C6	Stroma	15072	0.578136
P2#alignments.possorted.tagged_BC01435_N03	P2	20.738	2503	8868	590	0.340187	3.2277	2034	3083	13034	7917	5.6	0.0226331	C6	Stroma	15359	0.58919
P2#alignments.possorted.tagged_BC00390_N01	P2	19.264	2218	8499	569	0.326257	4.43161	3787	2398	13025	6840	4.36667	0.0218426	C5	PTM	15136	0.581036
P2#alignments.possorted.tagged_BC00379_N01	P2	20.541	2334	8699	513	0.334063	4.08594	3749	2560	13020	6711	3.4	0.0197005	C5	Stroma	15379	0.590591
P2#alignments.possorted.tagged_BC00783_N02	P2	23.073	2342	8424	520	0.323826	3.55587	2829	2855	13007	7323	2.83333	0.0199892	C5	PTM	14480	0.556623
P2#alignments.possorted.tagged_BC01509_N03	P2	22.154	2383	8558	564	0.328977	3.30695	1933	3020	13007	8054	1.86667	0.0216806	C5	PTM	15987	0.614554
P2#alignments.possorted.tagged_BC00395_N01	P2	15.923	1954	7587	650	0.291942	5.15246	3820	2112	12994	7062	4	0.0250115	C8	Macrophages	11625	0.447322
P2#alignments.possorted.tagged_BC01297_N03	P2	22.997	2253	8220	512	0.316787	3.31891	2593	3004	12974	7377	3.26667	0.0197318	C5	PTM	14802	0.570449
P2#alignments.possorted.tagged_BC00368_N01	P2	17.083	2105	8249	552	0.318126	3.56514	3475	2840	12965	6650	2.73333	0.0212881	C8	Innate lymph	14094	0.54354
P2#alignments.possorted.tagged_BC02220_N03	P2	19.542	2181	8006	529	0.30885	3.77209	2476	2716	12961	7769	3.66667	0.0204074	C6	Stroma	14783	0.570288
P2#alignments.possorted.tagged_BC00382_N01	P2	17.4	1652	6399	493	0.247104	3.78846	2701	2704	12948	7543	0.5	0.0190377	C6	Stroma	12691	0.490076
P2#alignments.possorted.tagged_BC00906_N02	P2	20.587	2256	8556	600	0.330782	2.94419	2784	3279	12933	6870	1.96667	0.0231965	C6	Stroma	15300	0.59151
P2#alignments.possorted.tagged_BC02152_N03	P2	18.862	2267	8583	546	0.332005	3.39062	2745	2944	12926	7237	3.13333	0.0211202	C6	Stroma	14863	0.574927
P2#alignments.possorted.tagged_BC01341_N02	P2	15.996	1866	7187	493	0.278631	3.93571	3049	2613	12897	7235	1.23333	0.019113	C5	PTM	14598	0.565946
P2#alignments.possorted.tagged_BC01067_N02	P2	23.412	2341	8397	556	0.326046	3.48832	2686	2869	12877	7322	0.533333	0.0215889	C5	PTM	15613	0.606236
P2#alignments.possorted.tagged_BC01085_N02	P2	21.515	2097	7741	469	0.300598	3.59529	3532	2802	12876	6542	4.36667	0.0182122	C8	Neutrophils	13962	0.542171
P2#alignments.possorted.tagged_BC02270_N03	P2	21.228	2262	8201	517	0.318485	3.63129	2873	2780	12875	7222	4.43333	0.0200777	C6	Stroma	14827	0.575806
P2#alignments.possorted.tagged_BC01198_N02	P2	19.142	2233	8026	570	0.311907	3.60982	2341	2791	12866	7734	2.56667	0.0221514	C4	Leydig cells	14907	0.579318
P2#alignments.possorted.tagged_BC02657_N05	P2	12.262	1418	5198	616	0.202257	0.798964	154	7143	12850	5553	1.46667	0.0239689	C8	Stroma	9690	0.377043
P2#alignments.possorted.tagged_BC01753_N03	P2	23.021	2360	8728	590	0.339849	3.05463	2575	3167	12841	7099	5.73333	0.0229733	C8	Innate lymph	15043	0.585741
P2#alignments.possorted.tagged_BC00377_N01	P2	20.614	2436	9244	621	0.359969	3.47231	3367	2871	12840	6602	5	0.0241822	C6	Stroma	14708	0.572741
P2#alignments.possorted.tagged_BC01652_N03	P2	26.543	2587	9182	525	0.357917	3.85136	2439	2644	12827	7744	1.8	0.0204646	C3	Sertoli cells	15792	0.615577
P2#alignments.possorted.tagged_BC00947_N02	P2	25.261	2360	8554	525	0.334219	3.27422	3150	2994	12797	6653	1.9	0.0205126	C5	PTM	15636	0.610924
P2#alignments.possorted.tagged_BC01170_N02	P2	23.877	2508	9015	582	0.352369	3.3989	2349	2908	12792	7535	5.33333	0.0227486	C6	Stroma	15111	0.590643
P2#alignments.possorted.tagged_BC00396_N01	P2	21.231	2080	8172	536	0.319443	4.09399	3151	2511	12791	7129	4.4	0.0209522	C6	Stroma	13881	0.542608
P2#alignments.possorted.tagged_BC00802_N03	P2	25.703	2583	9571	667	0.374599	2.57243	1613	3576	12775	7586	2.73333	0.0261057	C6	Stroma	16039	0.62775
P2#alignments.possorted.tagged_BC00870_N02	P2	23.332	2439	9040	541	0.353871	3.84009	3007	2639	12773	7127	5.13333	0.0211775	C6	Stroma	15399	0.602795
P2#alignments.possorted.tagged_BC02298_N03	P2	21.205	2206	8315	627	0.325491	3.86035	2637	2628	12773	7508	3.06667	0.024544	C6	Stroma	15198	0.594927
P2#alignments.possorted.tagged_BC02400_N03	P2	20.005	2364	8657	539	0.338958	3.1732	2216	3060	12770	7494	4.06667	0.0211042	C5	PTM	15398	0.602897
P2#alignments.possorted.tagged_BC00365_N01	P2	16.284	2023	7887	529	0.308955	2.8388	2953	3325	12764	6486	1.93333	0.0207223	C6	Stroma	13891	0.544148
P2#alignments.possorted.tagged_BC01316_N02	P2	25.446	2313	8210	556	0.32272	3.77836	2986	2662	12720	7072	0.3	0.0218553	C3	Sertoli cells	14820	0.582547
P2#alignments.possorted.tagged_BC00964_N02	P2	15.418	1565	6383	443	0.251022	3.49099	2190	2831	12714	7693	0.4	0.0174217	C4	Leydig cells	13464	0.529495
P2#alignments.possorted.tagged_BC00469_N02	P2	27.435	2577	9207	561	0.363023	2.91389	2263	3240	12681	7178	5.5	0.0221197	C6	Stroma	15333	0.604566
P2#alignments.possorted.tagged_BC01484_N02	P2	23.496	2907	10535	613	0.415943	2.40613	2152	3718	12664	6794	5.73333	0.0242025	C6	Stroma	16253	0.641701
P2#alignments.possorted.tagged_BC00404_N01	P2	17.325	1951	7512	635	0.297058	4.09839	2926	2480	12644	7238	0.2	0.0251107	C6	Stroma	13246	0.523806
P2#alignments.possorted.tagged_BC02650_N04	P2	23.301	2730	9510	634	0.376187	1.85779	913	4423	12640	7304	2.63333	0.0250791	C7	Innate lymph	15414	0.609731
P2#alignments.possorted.tagged_BC02074_N03	P2	24.472	2311	8531	560	0.337701	3.22866	2107	2987	12631	7537	3.03333	0.0221677	C6	Stroma	15170	0.600507
P2#alignments.possorted.tagged_BC00594_N02	P2	22.246	2303	8812	543	0.349461	3.70272	2777	2681	12608	7150	3.86667	0.0215339	C6	Stroma	14861	0.589348
P2#alignments.possorted.tagged_BC01033_N02	P2	20.215	2205	8202	555	0.325321	3.75519	2801	2651	12606	7154	4.93333	0.0220133	C6	Stroma	14148	0.561161
P2#alignments.possorted.tagged_BC01110_N02	P2	12.217	1783	7689	509	0.305046	3.11863	3282	3060	12603	6261	0.966667	0.0201936	C5	PTM	14458	0.573594
P2#alignments.possorted.tagged_BC01328_N02	P2	18.993	2206	8076	551	0.320451	4.21565	3515	2416	12601	6670	2.93333	0.0218633	C6	Stroma	13227	0.524839
P2#alignments.possorted.tagged_BC02817_N03	P2	16.929	2086	7791	514	0.309167	3.27408	2597	2948	12600	7055	1.2	0.0203968	C5	PTM	14692	0.583016
P2#alignments.possorted.tagged_BC00403_N01	P2	15.39	1430	5771	534	0.229026	3.96219	3372	2539	12599	6688	0.833333	0.0211922	C6	Stroma	10859	0.430947
P2#alignments.possorted.tagged_BC00407_N01	P2	24.064	2710	9467	591	0.375973	3.13465	2670	3045	12590	6875	3.73333	0.023471	C9	Endothelial cells	15488	0.615091
P2#alignments.possorted.tagged_BC01004_N02	P2	13.413	1077	4221	507	0.167646	2.28695	2116	3830	12589	6643	0.0666667	0.0201366	C3	Sertoli cells	8194	0.325443
P2#alignments.possorted.tagged_BC01449_N03	P2	18.295	2088	7746	529	0.307968	4.3356	2887	2357	12576	7332	1.86667	0.0210321	C5	PTM	14042	0.558286
P2#alignments.possorted.tagged_BC03334_N04	P2	23.645	2209	8085	486	0.32165	2.54928	1225	3541	12568	7802	1.66667	0.0193348	C5	PTM	15469	0.615412
P2#alignments.possorted.tagged_BC00405_N01	P2	22.786	2428	9383	567	0.373319	3.38639	2851	2865	12567	6851	4.06667	0.0225591	C6	Stroma	14287	0.568433
P2#alignments.possorted.tagged_BC02456_N03	P2	19.991	2332	8858	545	0.352684	3.29921	2274	2921	12558	7363	1.06667	0.0216993	C3	Sertoli cells	15161	0.603639
P2#alignments.possorted.tagged_BC00977_N03	P2	11.143	906	3813	755	0.151864	7.92888	2828	1406	12554	8320	0	0.0300701	C2	Germ cells	8168	0.325315
P2#alignments.possorted.tagged_BC00433_N01	P2	19.724	2022	7935	516	0.316842	4.36504	3398	2334	12522	6790	1.4	0.0206037	C6	Stroma	13371	0.5339
P2#alignments.possorted.tagged_BC01755_N04	P2	20.164	2230	8194	565	0.327367	3.15781	2390	3010	12515	7115	2.2	0.0225729	C5	PTM	15151	0.605314
P2#alignments.possorted.tagged_BC02678_N03	P2	24.347	2459	8631	555	0.344936	3.55111	2676	2749	12511	7086	2.43333	0.0221805	C5	PTM	15219	0.608225
P2#alignments.possorted.tagged_BC01928_N03	P2	20.369	2119	7879	561	0.314933	3.17942	2506	2993	12509	7010	4.9	0.0224239	C6	Stroma	14566	0.582221
P2#alignments.possorted.tagged_BC01215_N02	P2	20.712	1684	6213	728	0.248659	2.77546	3004	3309	12493	6180	1.33333	0.0291363	C1	Neutrophils	9578	0.383335
P2#alignments.possorted.tagged_BC01265_N02	P2	17.907	1899	7394	508	0.296139	3.47937	2835	2787	12484	6862	3.9	0.020346	C5	PTM	14208	0.569048
P2#alignments.possorted.tagged_BC00418_N01	P2	18.04	1904	7191	460	0.288494	4.11617	3113	2436	12463	6914	0.7	0.0184546	C5	PTM	13819	0.554401
P2#alignments.possorted.tagged_BC00412_N01	P2	18.541	1985	7463	474	0.299815	3.70904	3143	2643	12446	6660	3.1	0.0190423	C8	Innate lymph	13971	0.561265
P2#alignments.possorted.tagged_BC01884_N03	P2	21.497	2486	8724	581	0.350982	3.38997	2385	2831	12428	7212	3.4	0.0233746	C5	PTM	15303	0.615666
P2#alignments.possorted.tagged_BC00779_N02	P2	16.658	1918	7372	507	0.297186	4.08737	3612	2438	12403	6353	1.86667	0.0204386	C5	PTM	14448	0.58244
P2#alignments.possorted.tagged_BC00497_N03	P2	23.27	2550	9149	578	0.368852	3.18704	1522	2962	12402	7918	5.13333	0.0233027	C3	Sertoli cells	15428	0.621996
P2#alignments.possorted.tagged_BC01205_N02	P2	27.385	2268	8331	507	0.335873	2.9334	2435	3153	12402	6814	3.66667	0.0204403	C5	PTM	15579	0.628084
P2#alignments.possorted.tagged_BC01468_N02	P2	23.684	2428	8400	547	0.338792	3.65178	2907	2665	12397	6825	4.53333	0.0220618	C6	Stroma	14782	0.596193
P2#alignments.possorted.tagged_BC00622_N02	P2	21.375	2256	8381	545	0.338189	3.34619	3039	2851	12391	6501	0.8	0.0219918	C5	PTM	15221	0.614196
P2#alignments.possorted.tagged_BC02692_N03	P2	25.398	2655	9287	540	0.374929	2.57328	1736	3466	12385	7183	5.73333	0.0218006	C6	Stroma	16182	0.65329
P2#alignments.possorted.tagged_BC01373_N03	P2	23.644	2603	9111	559	0.368062	3.97668	2817	2487	12377	7073	0.166667	0.0225822	C3	Sertoli cells	14658	0.592147
P2#alignments.possorted.tagged_BC00871_N02	P2	17.95	1822	6883	478	0.278281	4.68336	3073	2176	12367	7118	0.233333	0.0193256	C3	Sertoli cells	12479	0.504528
P2#alignments.possorted.tagged_BC01273_N02	P2	21.703	2203	8659	539	0.350227	2.59674	2442	3437	12362	6483	4.2	0.0218007	C6	Stroma	15254	0.616971
P2#alignments.possorted.tagged_BC00981_N02	P2	19.701	2139	8218	565	0.332443	3.77404	3080	2589	12360	6691	1.33333	0.022856	C6	Stroma	13778	0.557362
P2#alignments.possorted.tagged_BC02060_N03	P2	22.237	2347	8141	542	0.329702	2.7503	2350	3292	12346	6704	2.7	0.0219504	C8	Macrophages	13389	0.54224
P2#alignments.possorted.tagged_BC01489_N03	P2	17.789	1635	6100	510	0.247244	5.4317	2938	1918	12336	7480	0.633333	0.0206712	C6	Stroma	12124	0.491407
P2#alignments.possorted.tagged_BC00769_N02	P2	19.971	1896	7058	526	0.286329	3.6527	2857	2649	12325	6819	2.5	0.0213387	C5	PTM	13494	0.547424
P2#alignments.possorted.tagged_BC00461_N02	P2	16.754	2056	7965	583	0.32357	4.55415	2955	2216	12308	7137	2.36667	0.0236838	C6	Stroma	13468	0.547124
P2#alignments.possorted.tagged_BC00416_N01	P2	17.935	1748	6957	492	0.282644	3.73346	3429	2600	12307	6278	0.633333	0.0199886	C5	PTM	13006	0.528398
P2#alignments.possorted.tagged_BC00901_N02	P2	22.547	2300	8208	602	0.333523	2.75725	2217	3275	12305	6813	4.93333	0.0244616	C6	Stroma	14588	0.592767
P2#alignments.possorted.tagged_BC01602_N02	P2	22.548	2266	8090	547	0.328755	4.22685	3061	2354	12304	6889	0.533333	0.0222285	C3	Sertoli cells	14208	0.577373
P2#alignments.possorted.tagged_BC00420_N01	P2	17.118	1582	6129	509	0.249491	3.31588	2716	2846	12283	6721	1.6	0.0207197	C5	PTM	12707	0.51726
P2#alignments.possorted.tagged_BC01370_N03	P2	21.122	2016	7263	501	0.295845	3.79492	2858	2560	12275	6857	0.233333	0.0204073	C3	Sertoli cells	13663	0.556538
P2#alignments.possorted.tagged_BC01521_N02	P2	23.46	2251	8291	572	0.337774	3.68435	3028	2620	12273	6625	3	0.0233032	C6	Stroma	14382	0.58592
P2#alignments.possorted.tagged_BC01369_N02	P2	17.851	1812	6700	467	0.273113	3.47501	2997	2741	12266	6528	0.433333	0.0190364	C5	PTM	13790	0.562123
P2#alignments.possorted.tagged_BC00436_N01	P2	18.107	1966	7293	502	0.297552	3.84387	2835	2530	12255	6890	2.93333	0.0204814	C6	Stroma	13771	0.561852
P2#alignments.possorted.tagged_BC02389_N03	P2	23.793	2295	7990	442	0.326149	3.19343	2517	2921	12249	6811	0.266667	0.0180423	C3	Sertoli cells	14618	0.596702
P2#alignments.possorted.tagged_BC02223_N03	P2	23.617	2600	8850	517	0.361313	3.19705	2213	2918	12247	7116	0.0666667	0.0211072	C3	Sertoli cells	15235	0.621989
P2#alignments.possorted.tagged_BC01420_N02	P2	19.117	1757	6890	542	0.281316	4.10889	2899	2397	12246	6950	0.133333	0.0221297	C3	Sertoli cells	12947	0.528622
P2#alignments.possorted.tagged_BC03168_N04	P2	23.564	2380	8344	567	0.340794	2.86549	1451	3167	12242	7624	3.76667	0.023158	C5	PTM	14943	0.610317
P2#alignments.possorted.tagged_BC00881_N02	P2	18.755	2131	7618	582	0.311193	3.91961	2908	2488	12240	6844	3.06667	0.0237745	C5	PTM	14101	0.576021
P2#alignments.possorted.tagged_BC00406_N01	P2	22.313	2310	8758	512	0.358347	2.86098	2352	3165	12220	6703	3.13333	0.0209493	C6	Stroma	14629	0.598568
P2#alignments.possorted.tagged_BC02395_N03	P2	25.648	2176	7762	522	0.317854	3.67458	2398	2612	12210	7200	2.13333	0.0213759	C8	Innate lymph	14600	0.597871
P2#alignments.possorted.tagged_BC00443_N01	P2	23.141	2197	8255	555	0.338292	3.67471	2969	2610	12201	6622	4.43333	0.022744	C5	Stroma	13914	0.570199
P2#alignments.possorted.tagged_BC01041_N02	P2	14.582	1598	6250	482	0.256253	4.29067	3068	2305	12195	6822	0.766667	0.0197622	C6	Stroma	12515	0.51312
P2#alignments.possorted.tagged_BC01128_N02	P2	22.141	2471	8574	544	0.351739	3.42717	2154	2753	12188	7281	5.6	0.022317	C5	PTM	14828	0.608303
P2#alignments.possorted.tagged_BC03588_N04	P2	11.903	1100	4547	679	0.186567	6.13049	1497	1709	12186	8980	0.0333333	0.0278598	C2	Germ cells	10605	0.43513
P2#alignments.possorted.tagged_BC00422_N01	P2	19.188	1938	6948	479	0.285292	2.65018	2424	3336	12177	6417	1.7	0.0196682	C5	PTM	12792	0.525253
P2#alignments.possorted.tagged_BC01530_N02	P2	16.002	1899	7337	575	0.30181	3.91707	2619	2472	12155	7064	1.76667	0.0236528	C6	Stroma	13125	0.539901
P2#alignments.possorted.tagged_BC00831_N02	P2	18.684	1972	7431	495	0.305702	3.43901	3036	2738	12154	6380	1.7	0.0203637	C5	PTM	13031	0.536079
P2#alignments.possorted.tagged_BC00455_N01	P2	22.822	2086	7595	523	0.31286	4.04908	3194	2404	12138	6540	0.0666667	0.0215439	C3	Sertoli cells	13115	0.540246
P2#alignments.possorted.tagged_BC00431_N01	P2	18.245	1769	6719	438	0.276867	3.53099	2944	2678	12134	6512	1.96667	0.0180485	C5	PTM	12863	0.53004
P2#alignments.possorted.tagged_BC00427_N01	P2	20.184	2324	8656	569	0.356742	2.9673	2474	3058	12132	6600	4.6	0.0234504	C5	PTM	14490	0.597181
P2#alignments.possorted.tagged_BC00448_N01	P2	21.493	2084	7530	483	0.31049	3.70547	3212	2577	12126	6337	3.93333	0.0199159	C5	PTM	14273	0.588529
P2#alignments.possorted.tagged_BC00727_N02	P2	20.177	2262	8273	506	0.341888	3.2319	2469	2859	12099	6771	3.16667	0.0209108	C5	PTM	14561	0.601744
P2#alignments.possorted.tagged_BC02040_N03	P2	19.665	1867	7077	483	0.292583	4.33245	3072	2268	12094	6754	0.0666667	0.0199686	C3	Sertoli cells	12753	0.527245
P2#alignments.possorted.tagged_BC00394_N01	P2	20.462	2263	8225	483	0.34027	1.68518	818	4501	12086	6767	3.16667	0.0199818	C4	Leydig cells	14446	0.597634
P2#alignments.possorted.tagged_BC00450_N01	P2	21.279	2074	7782	532	0.322076	3.73765	3027	2550	12081	6504	2.26667	0.022018	C6	Stroma	13574	0.561791
P2#alignments.possorted.tagged_BC00383_N01	P2	14.467	1673	6243	528	0.258424	2.66252	3536	3298	12079	5245	0.166667	0.0218561	C8	Macrophages	10553	0.436833
P2#alignments.possorted.tagged_BC01135_N02	P2	24.084	2396	8410	566	0.348125	3.487	2458	2692	12079	6929	3.33333	0.0234291	C5	PTM	14571	0.603154
P2#alignments.possorted.tagged_BC01069_N02	P2	15.52	1787	6729	484	0.278772	3.47663	2748	2696	12069	6625	0.4	0.0200514	C5	PTM	13955	0.578134
P2#alignments.possorted.tagged_BC02131_N03	P2	23.533	2151	7584	466	0.314402	3.23639	2538	2847	12061	6676	4.13333	0.0193185	C5	PTM	14199	0.588633
P2#alignments.possorted.tagged_BC00451_N01	P2	21.252	2125	7977	500	0.330968	3.55098	2637	2648	12051	6766	2.13333	0.0207452	C5	PTM	14789	0.613601
P2#alignments.possorted.tagged_BC01703_N03	P2	16.274	1693	6311	511	0.262237	2.86168	1375	3116	12033	7542	0.733333	0.0212333	C5	PTM	13221	0.549364
P2#alignments.possorted.tagged_BC03527_N04	P2	19.712	1971	7114	514	0.2958	3.24312	2246	2834	12025	6945	1.23333	0.0213721	C5	PTM	13651	0.567609
P2#alignments.possorted.tagged_BC02221_N03	P2	24.488	2498	8938	529	0.372014	2.73075	1889	3220	12013	6904	0.133333	0.0220178	C3	Sertoli cells	15094	0.628236
P2#alignments.possorted.tagged_BC01200_N02	P2	22.747	2240	8281	515	0.345157	3.99833	2564	2400	11996	7032	2	0.0214655	C6	Stroma	14287	0.59549
P2#alignments.possorted.tagged_BC01349_N02	P2	22.184	2151	8285	537	0.345381	2.7717	2499	3180	11994	6315	2.8	0.0223862	C6	Stroma	14045	0.585501
P2#alignments.possorted.tagged_BC00367_N01	P2	12.918	1096	4161	561	0.17352	1.79422	1216	4291	11990	6483	0.866667	0.0233945	C5	PTM	7359	0.306881
P2#alignments.possorted.tagged_BC00904_N02	P2	22.316	2175	8179	538	0.341076	3.82107	2737	2487	11990	6766	3.26667	0.0224354	C5	PTM	14259	0.594621
P2#alignments.possorted.tagged_BC00429_N01	P2	22.275	2171	7774	581	0.324241	2.86834	2209	3099	11988	6680	3.5	0.0242326	C6	Stroma	13395	0.558684
P2#alignments.possorted.tagged_BC00464_N01	P2	19.401	2224	8206	548	0.342259	3.69198	2909	2555	11988	6524	2.9	0.0228562	C6	Stroma	13466	0.561645
P2#alignments.possorted.tagged_BC03112_N04	P2	26.073	2449	8373	557	0.349662	2.97114	1564	3015	11973	7394	2.6	0.0232607	C6	Stroma	14872	0.621064
P2#alignments.possorted.tagged_BC01505_N02	P2	21.294	2484	8957	529	0.374488	2.66167	2360	3266	11959	6333	4.26667	0.0221172	C8	Macrophages	13820	0.577808
P2#alignments.possorted.tagged_BC02045_N03	P2	21.863	2175	7921	588	0.331423	3.50433	2395	2653	11950	6902	4.43333	0.0246025	C6	Stroma	14394	0.602259
P2#alignments.possorted.tagged_BC01323_N02	P2	17.702	1627	6058	366	0.253515	3.88471	2875	2446	11948	6627	0.0666667	0.0153164	C5	PTM	12810	0.536073
P2#alignments.possorted.tagged_BC00874_N02	P2	23.387	2303	8395	530	0.351432	3.46338	2420	2676	11944	6848	2.53333	0.0221869	C6	Stroma	13875	0.580836
P2#alignments.possorted.tagged_BC01772_N03	P2	25.211	2419	8638	567	0.361665	3.01952	2568	2971	11942	6403	4.5	0.0237397	C5	PTM	15442	0.646542
P2#alignments.possorted.tagged_BC01425_N02	P2	20.436	2353	9030	566	0.378299	3.08313	2503	2923	11935	6509	1.76667	0.0237118	C6	Stroma	14072	0.589527
P2#alignments.possorted.tagged_BC00812_N02	P2	20.959	2191	8149	509	0.34251	4.15648	3224	2307	11896	6365	3.86667	0.0213937	C6	Stroma	14530	0.610709
P2#alignments.possorted.tagged_BC01338_N02	P2	24.717	2072	7504	459	0.315665	3.85936	2784	2446	11886	6656	3.5	0.0193084	C5	PTM	14361	0.604114
P2#alignments.possorted.tagged_BC02997_N04	P2	23.833	2359	8342	554	0.351272	2.62233	1178	3278	11874	7418	4.26667	0.0233283	C8	Innate lymph	14451	0.608514
P2#alignments.possorted.tagged_BC01761_N03	P2	23.198	2261	8526	491	0.359383	2.82522	1902	3101	11862	6859	4.93333	0.0206963	C8	Innate lymph	14083	0.593618
P2#alignments.possorted.tagged_BC02133_N03	P2	17.924	2100	8494	502	0.358276	2.34198	2016	3547	11854	6291	2.96667	0.0211743	C7	Stroma	13575	0.572592
P2#alignments.possorted.tagged_BC00463_N01	P2	20.834	2220	7719	557	0.325696	3.24731	3038	2790	11850	6022	1.13333	0.0235021	C6	Stroma	12945	0.546203
P2#alignments.possorted.tagged_BC00747_N02	P2	20.358	2087	7874	480	0.332292	4.26344	3396	2251	11848	6201	5.33333	0.0202566	C5	PTM	13955	0.588918
P2#alignments.possorted.tagged_BC00721_N02	P2	21.274	2052	7492	549	0.316252	3.817	2545	2459	11845	6841	0.2	0.0231743	C6	Stroma	12847	0.542296
P2#alignments.possorted.tagged_BC01592_N02	P2	21.506	2259	8462	568	0.357197	2.92478	2520	3018	11845	6307	5.03333	0.0239764	C8	Innate lymph	13802	0.582609
P2#alignments.possorted.tagged_BC03488_N04	P2	22.623	2125	7707	483	0.325327	3.18847	1698	2828	11845	7319	3.2	0.0203883	C5	PTM	13718	0.579063
P2#alignments.possorted.tagged_BC01623_N03	P2	25.044	2188	7625	549	0.322029	2.69853	953	3201	11839	7685	1.73333	0.0231861	C6	Stroma	13665	0.577118
P2#alignments.possorted.tagged_BC00459_N01	P2	21.676	2244	8031	452	0.339262	3.00677	2675	2954	11836	6207	3.2	0.0190943	C5	PTM	14277	0.603118
P2#alignments.possorted.tagged_BC00869_N02	P2	18.567	1744	6495	449	0.274421	3.56207	2864	2594	11834	6376	0	0.0189708	C3	Sertoli cells	13253	0.559954
P2#alignments.possorted.tagged_BC00590_N02	P2	23.783	2330	8462	532	0.357892	3.37366	1929	2703	11822	7190	5.53333	0.0225004	C6	Stroma	14789	0.625486
P2#alignments.possorted.tagged_BC01750_N03	P2	22.658	2277	8154	584	0.345304	3.33125	2496	2726	11807	6585	4.36667	0.0247311	C6	Stroma	14504	0.614212
P2#alignments.possorted.tagged_BC01812_N03	P2	13.492	1533	6107	514	0.258705	3.36986	2035	2701	11803	7067	0.266667	0.0217741	C5	PTM	12675	0.53694
P2#alignments.possorted.tagged_BC01883_N03	P2	11.979	1585	6150	522	0.260593	5.19423	2379	1905	11800	7516	1.26667	0.0221186	C8	Macrophages	10571	0.447924
P2#alignments.possorted.tagged_BC01220_N03	P2	22.277	2160	7598	543	0.322304	3.5686	2377	2580	11787	6830	0.2	0.0230339	C3	Sertoli cells	13497	0.572538
P2#alignments.possorted.tagged_BC00478_N01	P2	20.914	1975	6970	439	0.29569	3.3109	2833	2734	11786	6219	2.33333	0.0186238	C5	PTM	13407	0.568768
P2#alignments.possorted.tagged_BC00489_N01	P2	20.57	2088	7573	479	0.32138	3.77391	2792	2468	11782	6522	5.23333	0.0203276	C8	Macrophages	12491	0.530088
P2#alignments.possorted.tagged_BC01619_N02	P2	19.498	1861	7167	480	0.304305	4.26655	2396	2236	11776	7144	0.3	0.0203804	C6	Stroma	12595	0.534774
P2#alignments.possorted.tagged_BC02021_N03	P2	19.243	2099	7788	482	0.330813	3.01467	2230	2932	11771	6609	3.23333	0.020474	C5	PTM	13260	0.563249
P2#alignments.possorted.tagged_BC01210_N02	P2	19.867	2147	7981	531	0.339184	3.1794	2356	2815	11765	6594	1.96667	0.0225669	C6	Stroma	14191	0.603102
P2#alignments.possorted.tagged_BC02709_N03	P2	17.993	2099	7643	572	0.324957	4.21739	2313	2254	11760	7193	1.4	0.0243197	C8	Macrophages	11388	0.484184
P2#alignments.possorted.tagged_BC01693_N03	P2	25.958	2412	8396	481	0.357094	3.34924	2122	2703	11756	6931	2.5	0.0204576	C5	PTM	15101	0.642268
P2#alignments.possorted.tagged_BC01221_N02	P2	17.971	1924	7109	511	0.302691	4.19142	3068	2262	11743	6413	0.7	0.0217576	C3	Sertoli cells	12871	0.548029
P2#alignments.possorted.tagged_BC01048_N02	P2	20.295	2142	8022	502	0.341769	3.42534	2308	2652	11736	6776	1.5	0.0213872	C6	Stroma	14226	0.606084
P2#alignments.possorted.tagged_BC02572_N03	P2	19.454	2181	8782	466	0.374339	1.85888	1219	4103	11730	6408	2.86667	0.0198636	C6	Stroma	15134	0.645098
P2#alignments.possorted.tagged_BC01522_N02	P2	16.06	1541	5801	408	0.247885	3.74493	2908	2466	11701	6327	0.666667	0.0174344	C5	PTM	11772	0.503034
P2#alignments.possorted.tagged_BC01653_N02	P2	20.157	2158	7676	530	0.328146	3.33506	2295	2698	11696	6703	1.3	0.0226573	C5	PTM	14359	0.613842
P2#alignments.possorted.tagged_BC01177_N02	P2	25.272	2361	8508	544	0.36387	3.08491	2345	2862	11691	6484	1.13333	0.0232658	C6	Stroma	14119	0.603841
P2#alignments.possorted.tagged_BC00483_N01	P2	18.155	1797	7088	449	0.303269	3.67814	2700	2498	11686	6488	2.13333	0.019211	C6	Stroma	12198	0.521907
P2#alignments.possorted.tagged_BC01624_N02	P2	18.185	2002	7413	539	0.317473	3.30812	2869	2710	11675	6096	4.43333	0.0230835	C6	Stroma	12542	0.537131
P2#alignments.possorted.tagged_BC02551_N03	P2	28.503	2375	8088	531	0.34647	3.22134	1509	2765	11672	7398	1.9	0.0227467	C5	PTM	14649	0.627527
P2#alignments.possorted.tagged_BC01143_N02	P2	22.191	2387	8929	481	0.38289	2.72167	1782	3133	11660	6745	3.43333	0.0206261	C6	Stroma	14589	0.6256
P2#alignments.possorted.tagged_BC01217_N02	P2	19.683	1650	6170	519	0.264921	3.21462	2559	2763	11645	6323	2.06667	0.0222842	C5	PTM	11244	0.482782
P2#alignments.possorted.tagged_BC00902_N03	P2	17.889	1337	4728	579	0.20325	1.24018	295	5192	11631	6144	0.166667	0.0248904	C6	Sertoli cells	8077	0.347219
P2#alignments.possorted.tagged_BC01404_N02	P2	15.809	1469	5899	484	0.253633	3.70429	2371	2472	11629	6786	0.7	0.02081	C5	PTM	11871	0.510405
P2#alignments.possorted.tagged_BC03662_N04	P2	20.055	2137	7742	499	0.333161	2.55974	1467	3264	11619	6888	3.66667	0.0214734	C5	PTM	13925	0.599234
P2#alignments.possorted.tagged_BC00687_N02	P2	22.467	2133	7811	556	0.336449	3.75738	2713	2440	11608	6455	1.8	0.023949	C6	Stroma	13254	0.570899
P2#alignments.possorted.tagged_BC00487_N01	P2	19.307	1794	6756	467	0.291056	4.07477	2972	2287	11606	6347	0.133333	0.0201189	C3	Sertoli cells	12627	0.543986
P2#alignments.possorted.tagged_BC00424_N01	P2	21.635	1770	6154	571	0.265167	1.95869	1562	3922	11604	6120	3.1	0.0246036	C8	Macrophages	10005	0.431101
P2#alignments.possorted.tagged_BC02327_N03	P2	18.95	1713	6250	519	0.269304	1.30421	478	5036	11604	6090	2.26667	0.022363	C9	Endothelial cells	9895	0.426362
P2#alignments.possorted.tagged_BC00501_N01	P2	18.839	2055	7671	474	0.330561	3.52182	2914	2566	11603	6123	3.8	0.0204258	C5	PTM	13681	0.589546
P2#alignments.possorted.tagged_BC01202_N02	P2	15.715	1857	6914	564	0.297992	3.48434	2992	2587	11601	6022	0.433333	0.0243082	C6	Stroma	12307	0.530428
P2#alignments.possorted.tagged_BC00496_N01	P2	22.629	2297	8409	474	0.362738	3.31855	2477	2684	11591	6430	2.63333	0.0204469	C6	Stroma	14053	0.606203
P2#alignments.possorted.tagged_BC02444_N03	P2	21.782	2200	7794	494	0.336209	3.15597	2253	2789	11591	6549	2.36667	0.0213096	C8	Macrophages	13855	0.597662
P2#alignments.possorted.tagged_BC00502_N01	P2	21.164	2020	7416	510	0.320041	4.11072	2645	2267	11586	6674	0.2	0.0220093	C3	Sertoli cells	13321	0.574875
P2#alignments.possorted.tagged_BC01429_N02	P2	27.798	2204	7874	539	0.339983	3.84114	2583	2392	11580	6605	4.03333	0.0232729	C5	PTM	14284	0.616753
P2#alignments.possorted.tagged_BC02799_N04	P2	23.099	2228	7933	478	0.343063	3.054	1578	2852	11562	7132	5.6	0.0206712	C5	PTM	14276	0.617367
P2#alignments.possorted.tagged_BC00474_N01	P2	16.332	1600	6532	447	0.282673	3.11907	2938	2805	11554	5811	0.466667	0.019344	C6	Stroma	11437	0.494937
P2#alignments.possorted.tagged_BC01122_N02	P2	22.095	2187	8244	474	0.357347	3.15826	2436	2774	11535	6325	2.76667	0.0205462	C7	Stroma	13017	0.564239
P2#alignments.possorted.tagged_BC02607_N03	P2	21.771	1902	7161	438	0.310592	3.68618	2418	2460	11528	6650	2.3	0.0189972	C6	Stroma	13556	0.58796
P2#alignments.possorted.tagged_BC00503_N01	P2	20.918	1912	7308	490	0.317132	3.29285	2520	2684	11522	6318	1.13333	0.0212637	C6	Stroma	12261	0.532069
P2#alignments.possorted.tagged_BC01636_N02	P2	19.086	1918	7168	527	0.311652	4.15926	3172	2229	11500	6099	3.5	0.022913	C5	PTM	12582	0.547043
P2#alignments.possorted.tagged_BC02792_N04	P2	29.471	2545	8857	530	0.385154	1.85807	1046	4023	11498	6429	0.433333	0.0230475	C3	Sertoli cells	14693	0.638937
P2#alignments.possorted.tagged_BC00526_N01	P2	16.559	1547	6238	489	0.271666	5.44276	3333	1782	11481	6366	1.6	0.0212961	C6	Stroma	12020	0.523474
P2#alignments.possorted.tagged_BC01533_N03	P2	20.97	2351	8298	542	0.361663	3.24574	1893	2702	11472	6877	4.13333	0.0236227	C6	Stroma	14378	0.626656
P2#alignments.possorted.tagged_BC00498_N01	P2	18.073	1725	6560	495	0.285938	3.79156	3068	2394	11471	6009	0.333333	0.0215761	C5	PTM	13046	0.568651
P2#alignments.possorted.tagged_BC00500_N01	P2	20.884	2162	8227	557	0.3586	3.0924	1857	2803	11471	6811	2.2	0.0242786	C6	Stroma	13612	0.593322
P2#alignments.possorted.tagged_BC01422_N02	P2	19.056	1328	4818	556	0.210008	1.83025	978	4053	11471	6440	0.166667	0.024235	C6	Stroma	8419	0.366969
P2#alignments.possorted.tagged_BC01503_N02	P2	19.911	1830	6687	474	0.29155	4.08784	2957	2254	11468	6257	1.83333	0.0206662	C5	PTM	12847	0.560124
P2#alignments.possorted.tagged_BC01271_N02	P2	21.016	2112	7394	462	0.32246	3.35104	2522	2635	11465	6308	5.7	0.0201483	C5	PTM	14141	0.616703
P2#alignments.possorted.tagged_BC01350_N02	P2	23.948	2322	8365	476	0.364806	3.39946	2306	2606	11465	6553	3.86667	0.0207588	C6	Stroma	13986	0.609943
P2#alignments.possorted.tagged_BC01166_N02	P2	17.063	1732	6772	467	0.295566	4.20727	2697	2200	11456	6559	5.16667	0.0203823	C6	Stroma	12881	0.562194
P2#alignments.possorted.tagged_BC00532_N01	P2	16.999	1425	5653	413	0.246813	4.36142	3150	2136	11452	6166	0	0.0180318	C3	Sertoli cells	11182	0.488212
P2#alignments.possorted.tagged_BC01678_N03	P2	26.834	2507	8973	560	0.391903	2.82748	1737	2991	11448	6720	3.6	0.0244584	C8	Neutrophils	13417	0.585998
P2#alignments.possorted.tagged_BC01175_N02	P2	15.909	1663	6728	486	0.294107	4.01887	2705	2279	11438	6454	0.266667	0.021245	C6	Stroma	12263	0.536064
P2#alignments.possorted.tagged_BC00479_N01	P2	22.552	1788	6437	464	0.281559	2.56996	1594	3202	11431	6635	5	0.0202957	C4	Leydig cells	12556	0.549208
P2#alignments.possorted.tagged_BC00495_N01	P2	22.458	2393	8495	627	0.371577	2.79389	2067	3013	11431	6351	4.16667	0.0274254	C6	Stroma	13346	0.583763
P2#alignments.possorted.tagged_BC01497_N02	P2	23.909	2113	7700	560	0.33698	3.58467	2443	2492	11425	6490	0.4	0.0245077	C3	Sertoli cells	13232	0.579081
P2#alignments.possorted.tagged_BC00537_N01	P2	14.757	1483	5933	475	0.259832	4.11744	2627	2231	11417	6559	0.0666667	0.0208023	C3	Sertoli cells	11382	0.498467
P2#alignments.possorted.tagged_BC01642_N02	P2	18.603	2048	7332	529	0.321128	3.46461	2264	2557	11416	6595	5.43333	0.0231692	C8	Innate lymph	13192	0.577786
P2#alignments.possorted.tagged_BC01790_N03	P2	24.752	2425	8400	517	0.367969	3.06048	1523	2811	11414	7080	0.5	0.0226476	C3	Sertoli cells	14128	0.618889
P2#alignments.possorted.tagged_BC01844_N02	P2	22.638	2275	7989	534	0.349996	3.33131	2505	2635	11413	6273	0.0666667	0.0233944	C3	Sertoli cells	13608	0.596162
P2#alignments.possorted.tagged_BC02913_N03	P2	21.672	1959	7364	535	0.322728	3.29718	2277	2655	11409	6477	3.53333	0.0234464	C6	Stroma	12772	0.559734
P2#alignments.possorted.tagged_BC01581_N02	P2	18.353	1761	6629	477	0.290924	4.1552	2531	2210	11393	6652	1.73333	0.0209339	C5	PTM	12333	0.541253
P2#alignments.possorted.tagged_BC00996_N02	P2	18.975	1744	6565	411	0.288141	3.93588	2775	2308	11392	6309	0.466667	0.018039	C5	Stroma	11950	0.524491
P2#alignments.possorted.tagged_BC01246_N02	P2	15.39	1671	6290	530	0.276095	4.31793	2357	2142	11391	6892	0.9	0.023264	C6	Stroma	12121	0.532043
P2#alignments.possorted.tagged_BC01557_N02	P2	21.164	1678	6423	493	0.282032	3.8087	3005	2368	11387	6014	0.133333	0.0216475	C3	Sertoli cells	12190	0.53526
P2#alignments.possorted.tagged_BC00522_N01	P2	17.865	1660	6521	455	0.286436	4.09306	2994	2235	11383	6154	0.0333333	0.0199859	C3	Sertoli cells	11618	0.510322
P2#alignments.possorted.tagged_BC01948_N02	P2	19.762	1986	7243	535	0.318206	3.8143	2685	2364	11381	6332	1.9	0.0235041	C6	Stroma	13226	0.581056
P2#alignments.possorted.tagged_BC00477_N01	P2	24.965	2055	7547	570	0.331765	2.05097	1471	3728	11374	6175	3.9	0.0250571	C8	Innate lymph	13062	0.574204
P2#alignments.possorted.tagged_BC01558_N02	P2	18.032	1712	6414	434	0.282207	4.67916	3112	2001	11364	6251	1.13333	0.0190954	C5	PTM	12290	0.540743
P2#alignments.possorted.tagged_BC00544_N01	P2	19.408	1872	6824	459	0.300273	3.91479	2580	2312	11363	6471	0.966667	0.0201971	C6	Stroma	12320	0.54211
P2#alignments.possorted.tagged_BC03111_N04	P2	23.207	2297	8318	517	0.366658	3.13827	1916	2741	11343	6686	4.4	0.0227894	C5	PTM	14330	0.631667
P2#alignments.possorted.tagged_BC01647_N02	P2	20.867	1802	6842	507	0.301888	3.2908	2714	2641	11332	5977	0.466667	0.0223703	C3	Sertoli cells	12763	0.56314
P2#alignments.possorted.tagged_BC03236_N03	P2	25.279	2017	7372	422	0.325618	4.15953	2087	2194	11320	7039	0.2	0.0186396	C3	Sertoli cells	13353	0.589797
P2#alignments.possorted.tagged_BC01241_N02	P2	19.208	1940	7444	474	0.329089	3.74413	2911	2384	11310	6015	5.1	0.0209549	C8	Innate lymph	12781	0.565031
P2#alignments.possorted.tagged_BC01044_N03	P2	24.27	2010	7427	533	0.328512	3.99293	2205	2264	11304	6835	0.3	0.0235757	C3	Sertoli cells	12730	0.563075
P2#alignments.possorted.tagged_BC00541_N01	P2	20.711	1799	6680	431	0.295706	3.82692	2558	2340	11295	6397	0.766667	0.0190792	C6	Stroma	12228	0.541301
P2#alignments.possorted.tagged_BC01690_N02	P2	20.748	1645	5886	412	0.260627	2.51666	1996	3211	11292	6085	0.8	0.018243	C6	Stroma	10066	0.445714
P2#alignments.possorted.tagged_BC00517_N01	P2	21.933	2182	7616	537	0.337409	3.05097	2223	2786	11286	6277	2.93333	0.0237905	C6	Stroma	13112	0.580897
P2#alignments.possorted.tagged_BC00528_N01	P2	22.551	2141	7766	470	0.344268	3.7153	2932	2392	11279	5955	2.06667	0.0208352	C6	Stroma	13451	0.596285
P2#alignments.possorted.tagged_BC01256_N02	P2	18.807	2042	7600	484	0.337448	3.78784	2413	2352	11261	6496	2.53333	0.0214901	C5	PTM	13587	0.603277
P2#alignments.possorted.tagged_BC00547_N01	P2	16.29	1851	6916	482	0.307105	4.35171	2674	2104	11260	6482	1.63333	0.0214032	C6	Stroma	12515	0.555728
P2#alignments.possorted.tagged_BC00514_N01	P2	24.399	2070	7808	500	0.346745	3.23112	2105	2661	11259	6493	4.8	0.0222045	C6	Stroma	12892	0.57252
P2#alignments.possorted.tagged_BC00521_N01	P2	19.709	1702	6554	443	0.291108	3.74578	3000	2372	11257	5885	0.166667	0.0196766	C3	Sertoli cells	12330	0.547659
P2#alignments.possorted.tagged_BC01281_N03	P2	20.861	2107	7789	543	0.346085	3.19575	2138	2682	11253	6433	1.86667	0.0241269	C5	PTM	14244	0.632898
P2#alignments.possorted.tagged_BC02031_N03	P2	20.172	1416	5353	512	0.238038	4.22248	1481	2153	11244	7610	3.6	0.0227677	C2	Germ cells	10205	0.453798
P2#alignments.possorted.tagged_BC03397_N04	P2	17.388	1765	6546	432	0.29114	3.27615	1943	2629	11242	6670	0.666667	0.0192137	C6	Stroma	12571	0.559109
P2#alignments.possorted.tagged_BC00548_N01	P2	14.217	1558	6112	410	0.271862	4.14934	3386	2183	11241	5672	1.36667	0.0182368	C5	PTM	11985	0.533093
P2#alignments.possorted.tagged_BC00530_N01	P2	21.176	1850	6655	466	0.296278	3.80368	2681	2338	11231	6212	3.1	0.0207461	C6	Stroma	12096	0.538509
P2#alignments.possorted.tagged_BC02132_N03	P2	26.132	2481	8655	573	0.385455	3.41834	2053	2541	11227	6633	0.3	0.0255188	C3	Sertoli cells	14171	0.631112
P2#alignments.possorted.tagged_BC02161_N03	P2	22.035	2003	7472	561	0.332799	2.47877	1892	3227	11226	6107	5	0.0249866	C8	Innate lymph	11902	0.530109
P2#alignments.possorted.tagged_BC01562_N02	P2	23.11	1984	7483	435	0.333973	2.97975	2298	2815	11203	6090	5.13333	0.0194144	C5	PTM	13526	0.603678
P2#alignments.possorted.tagged_BC01816_N02	P2	23.762	1896	7105	478	0.317131	3.3486	2358	2576	11202	6268	0.733333	0.0213355	C3	Sertoli cells	12753	0.569229
P2#alignments.possorted.tagged_BC01494_N03	P2	24.566	2171	7745	438	0.345852	3.70067	2394	2382	11197	6421	5.06667	0.0195588	C5	PTM	13961	0.623426
P2#alignments.possorted.tagged_BC01775_N02	P2	21.51	2216	7789	441	0.347816	3.65185	2252	2407	11197	6538	2.66667	0.0196928	C5	PTM	13972	0.623917
P2#alignments.possorted.tagged_BC01588_N03	P2	26.503	2369	8749	528	0.390894	2.9769	2147	2814	11191	6230	5.6	0.0235904	C6	Stroma	13573	0.606425
P2#alignments.possorted.tagged_BC01802_N02	P2	18.794	1547	5950	524	0.265934	3.972	2634	2250	11187	6303	2.56667	0.02342	C6	Stroma	11477	0.512961
P2#alignments.possorted.tagged_BC00520_N01	P2	17.644	1684	6452	525	0.288474	3.46071	2268	2507	11183	6408	1.96667	0.0234731	C6	Stroma	11857	0.530135
P2#alignments.possorted.tagged_BC00486_N01	P2	14.635	1626	6221	470	0.27817	3.64755	2677	2406	11182	6099	0.833333	0.0210159	C5	PTM	12094	0.54078
P2#alignments.possorted.tagged_BC01399_N02	P2	18.317	1665	6495	482	0.2905	3.7129	2184	2372	11179	6623	0.633333	0.0215583	C6	Stroma	11820	0.52867
P2#alignments.possorted.tagged_BC01579_N02	P2	21.916	1959	6921	511	0.309609	3.52693	2861	2469	11177	5847	0.0333333	0.0228594	C3	Sertoli cells	12784	0.571889
P2#alignments.possorted.tagged_BC04148_N04	P2	22.979	2170	7756	488	0.347118	3.05223	2010	2757	11172	6405	0.133333	0.0218403	C3	Sertoli cells	13261	0.593493
P2#alignments.possorted.tagged_BC00546_N01	P2	18.252	1613	5878	436	0.263233	4.02249	3007	2223	11165	5935	1	0.0195253	C5	PTM	11957	0.535468
P2#alignments.possorted.tagged_BC01092_N02	P2	21.404	1924	6895	447	0.30886	2.69603	1081	3020	11162	7061	0.733333	0.0200233	C4	Leydig cells	12260	0.549185
P2#alignments.possorted.tagged_BC02072_N03	P2	24.025	2378	8607	529	0.385722	2.86189	1634	2889	11157	6634	2.66667	0.0237071	C9	Endothelial cells	13863	0.621269
P2#alignments.possorted.tagged_BC01799_N03	P2	21.246	1942	6899	422	0.309344	4.00718	2141	2227	11151	6783	4.83333	0.0189221	C6	Stroma	12264	0.549906
P2#alignments.possorted.tagged_BC00529_N01	P2	22.717	2042	7484	438	0.335635	3.24724	2450	2625	11149	6074	3.96667	0.019643	C5	PTM	13383	0.600188
P2#alignments.possorted.tagged_BC00849_N02	P2	16.985	1664	6518	442	0.292418	3.31642	2381	2582	11145	6182	0.233333	0.0198295	C3	Sertoli cells	12093	0.54253
P2#alignments.possorted.tagged_BC01674_N02	P2	18.878	2002	7627	484	0.342294	3.46891	2305	2493	11141	6343	4.5	0.0217216	C6	Stroma	12550	0.563235
P2#alignments.possorted.tagged_BC00562_N01	P2	22.345	2065	7460	479	0.33486	4.22712	2748	2131	11139	6260	0.2	0.021501	C3	Sertoli cells	12962	0.58183
P2#alignments.possorted.tagged_BC01625_N02	P2	17.787	1545	5936	492	0.266619	4.07384	2485	2194	11132	6453	1.03333	0.0220985	C6	Stroma	11366	0.51051
P2#alignments.possorted.tagged_BC01467_N02	P2	23.231	2053	7369	514	0.331012	3.16268	1797	2674	11131	6660	1.7	0.0230887	C6	Stroma	12521	0.562438
P2#alignments.possorted.tagged_BC00550_N01	P2	21.939	2105	7338	555	0.32965	3.23677	2179	2627	11130	6324	0.433333	0.0249326	C3	Sertoli cells	12761	0.57327
P2#alignments.possorted.tagged_BC02082_N03	P2	19.302	2047	7758	563	0.348518	4.07755	2078	2192	11130	6860	1.53333	0.025292	C8	Macrophages	11482	0.515813
P2#alignments.possorted.tagged_BC00950_N02	P2	21.512	1912	7176	500	0.322459	3.67128	2693	2382	11127	6052	0.966667	0.0224679	C5	PTM	13024	0.585243
P2#alignments.possorted.tagged_BC00595_N01	P2	12.303	876	3711	506	0.166817	9.9156	2904	1019	11123	7200	0	0.0227457	C2	Germ cells	8029	0.360919
P2#alignments.possorted.tagged_BC01915_N02	P2	19.383	1987	7219	456	0.324887	3.68579	2150	2371	11110	6589	2.66667	0.0205221	C6	Stroma	12830	0.577408
P2#alignments.possorted.tagged_BC00543_N01	P2	17.95	1541	6005	429	0.270447	4.37367	2976	2066	11102	6060	0.8	0.0193208	C6	Stroma	11606	0.522699
P2#alignments.possorted.tagged_BC01061_N02	P2	18.485	1755	6374	491	0.287195	4.0122	2660	2214	11097	6223	0.0333333	0.0221231	C3	Sertoli cells	12461	0.561458
P2#alignments.possorted.tagged_BC01441_N02	P2	21.392	2031	8169	506	0.368272	3.18686	2636	2649	11091	5806	3.9	0.0228113	C6	Stroma	13176	0.593995
P2#alignments.possorted.tagged_BC02283_N03	P2	24.98	2359	8341	492	0.376093	3.27157	2119	2596	11089	6374	3.26667	0.0221841	C5	PTM	14083	0.634999
P2#alignments.possorted.tagged_BC00554_N01	P2	23.408	1915	7101	510	0.320906	3.50122	2669	2458	11064	5937	0.2	0.0230477	C3	Sertoli cells	12381	0.559517
P2#alignments.possorted.tagged_BC01759_N03	P2	19.669	1778	6647	478	0.300796	3.67188	2542	2365	11049	6142	0.966667	0.0216309	C5	PTM	12766	0.577699
P2#alignments.possorted.tagged_BC01637_N02	P2	24.336	2163	7925	479	0.35889	3.1167	2240	2682	11041	6119	4.1	0.0216919	C5	PTM	13733	0.621909
P2#alignments.possorted.tagged_BC01718_N02	P2	20.043	1994	7279	493	0.329874	3.176	2170	2642	11033	6221	1.2	0.0223421	C6	Stroma	12650	0.57328
P2#alignments.possorted.tagged_BC01921_N02	P2	18.987	1841	6798	467	0.308215	3.38315	2383	2516	11028	6129	1.16667	0.0211734	C6	Stroma	12125	0.549737
P2#alignments.possorted.tagged_BC00577_N01	P2	7.399	680	3334	456	0.151174	9.35399	3014	1065	11027	6948	0.0666667	0.0206765	C1	Macrophages	5919	0.268387
P2#alignments.possorted.tagged_BC03584_N05	P2	25.659	2449	8321	468	0.377472	2.21716	464	3426	11022	7132	4.56667	0.0212303	C5	PTM	14733	0.668345
P2#alignments.possorted.tagged_BC01540_N02	P2	16.492	1649	6412	388	0.291031	3.79791	2852	2296	11016	5868	0.2	0.0176107	C5	PTM	12760	0.579158
P2#alignments.possorted.tagged_BC02330_N03	P2	23.553	2248	8172	459	0.370949	2.71501	1622	2965	11015	6428	2.16667	0.0208352	C6	Stroma	14414	0.65429
P2#alignments.possorted.tagged_BC03247_N04	P2	10.103	750	3381	673	0.1535	6.70679	1415	1429	11013	8169	0	0.0305548	C2	Germ cells	7833	0.355625
P2#alignments.possorted.tagged_BC02397_N03	P2	24.132	2023	7406	533	0.3363	3.85066	2506	2270	11011	6235	1.73333	0.0242031	C5	PTM	12711	0.577196
P2#alignments.possorted.tagged_BC02077_N03	P2	15.913	1776	7018	443	0.318971	3.63981	2279	2371	11001	6351	2	0.0201345	C5	PTM	12347	0.561176
P2#alignments.possorted.tagged_BC01419_N02	P2	18.746	1846	6685	442	0.303864	3.53421	2379	2426	11000	6195	1.26667	0.0200909	C5	PTM	12628	0.574
P2#alignments.possorted.tagged_BC02963_N03	P2	18.229	1657	6248	482	0.284	4.10678	2849	2154	11000	5997	3.1	0.0219091	C4	Leydig cells	11824	0.537455
P2#alignments.possorted.tagged_BC02869_N04	P2	19.76	1886	6854	490	0.311574	3.43151	2325	2482	10999	6192	2.4	0.0222748	C5	PTM	12327	0.560369
P2#alignments.possorted.tagged_BC03399_N04	P2	28.713	2175	7566	444	0.344003	2.62459	704	3034	10997	7259	4.83333	0.0201873	C8	Innate lymph	13486	0.613167
P2#alignments.possorted.tagged_BC01082_N04	P2	22.218	1986	7285	508	0.331317	3.30125	2068	2556	10994	6370	1	0.0231035	C5	PTM	13200	0.600327
P2#alignments.possorted.tagged_BC03085_N03	P2	27.68	1929	7355	473	0.334561	3.28371	2369	2566	10992	6057	2.43333	0.0215156	C5	PTM	13453	0.611945
P2#alignments.possorted.tagged_BC01709_N02	P2	17.684	1536	5762	467	0.262195	4.21252	3031	2108	10988	5849	0.3	0.0212505	C5	PTM	11681	0.531534
P2#alignments.possorted.tagged_BC01016_N02	P2	23.899	2281	8604	614	0.391696	2.91272	2177	2807	10983	5999	2.73333	0.0279523	C3	Sertoli cells	13092	0.596012
P2#alignments.possorted.tagged_BC01999_N03	P2	17.506	1662	6448	452	0.293598	3.85885	2283	2260	10981	6438	0.133333	0.020581	C3	Sertoli cells	11959	0.544531
P2#alignments.possorted.tagged_BC01184_N02	P2	16.513	1501	5763	412	0.262839	3.75618	2531	2305	10963	6127	0.133333	0.0187905	C5	PTM	11754	0.536076
P2#alignments.possorted.tagged_BC01523_N02	P2	15.058	1711	6809	417	0.310545	3.17797	2483	2624	10963	5856	2	0.0190185	C6	Stroma	12002	0.547387
P2#alignments.possorted.tagged_BC01733_N03	P2	15.862	1538	5876	454	0.26858	4.96781	2803	1833	10939	6303	0.9	0.0207514	C6	Stroma	10805	0.493875
P2#alignments.possorted.tagged_BC02663_N03	P2	19.556	1669	6016	388	0.275005	4.07093	2492	2157	10938	6289	1.2	0.0177363	C5	PTM	12320	0.563174
P2#alignments.possorted.tagged_BC00778_N02	P2	24.655	2017	7068	459	0.323182	3.38452	1996	2494	10935	6445	3.16667	0.0209877	C4	Leydig cells	12679	0.579744
P2#alignments.possorted.tagged_BC03117_N03	P2	21.104	1993	7251	422	0.331611	3.0077	1347	2728	10933	6858	3.73333	0.0192994	C6	Stroma	13158	0.601756
P2#alignments.possorted.tagged_BC00800_N02	P2	24.087	2080	7459	463	0.341248	2.98578	2243	2742	10929	5944	3.5	0.0211822	C5	PTM	12661	0.579239
P2#alignments.possorted.tagged_BC01331_N02	P2	19.938	1903	6685	479	0.306034	3.37405	2573	2497	10922	5852	0.0666667	0.0219282	C3	Sertoli cells	12508	0.572606
P2#alignments.possorted.tagged_BC01086_N02	P2	16.906	1588	6221	436	0.284897	4.36775	3000	2034	10918	5884	0.5	0.019967	C6	Stroma	11136	0.509984
P2#alignments.possorted.tagged_BC00575_N01	P2	17.007	1649	6480	436	0.297002	4.14575	2832	2120	10909	5957	1.06667	0.0199835	C6	Stroma	12836	0.588322
P2#alignments.possorted.tagged_BC00557_N01	P2	20.712	1820	6585	404	0.301898	3.58043	2786	2381	10906	5739	2.93333	0.0185219	C6	Stroma	12112	0.555291
P2#alignments.possorted.tagged_BC00560_N01	P2	23.238	1948	7255	466	0.332768	3.36389	2127	2498	10901	6276	1.4	0.0213742	C6	Stroma	12724	0.583616
P2#alignments.possorted.tagged_BC01193_N03	P2	21.752	2142	7862	468	0.360609	3.2632	2152	2557	10901	6192	0.6	0.0214659	C6	Stroma	13006	0.596551
P2#alignments.possorted.tagged_BC00578_N01	P2	16.057	1492	5744	381	0.26351	4.10731	3145	2134	10899	5620	1.26667	0.0174787	C6	Leydig cells	11458	0.525645
P2#alignments.possorted.tagged_BC03047_N04	P2	25.051	2391	8747	584	0.401312	2.40137	1376	3204	10898	6318	2.56667	0.0267939	C6	Stroma	13377	0.613736
P2#alignments.possorted.tagged_BC00582_N01	P2	17.034	1471	5922	426	0.271776	5.13457	3282	1776	10895	5837	0.333333	0.0195503	C6	Stroma	11512	0.528316
P2#alignments.possorted.tagged_BC01821_N02	P2	17.343	1629	6294	444	0.288848	3.75142	2618	2293	10895	5984	1.63333	0.0203763	C6	Stroma	12120	0.556218
P2#alignments.possorted.tagged_BC01032_N02	P2	17.081	1613	6197	427	0.284946	3.67297	2883	2327	10874	5664	0.166667	0.019634	C3	Sertoli cells	12048	0.553982
P2#alignments.possorted.tagged_BC00573_N01	P2	25.31	1930	7113	439	0.327185	3.54812	2485	2390	10870	5995	4.9	0.0201932	C8	Innate lymph	12242	0.563109
P2#alignments.possorted.tagged_BC00558_N01	P2	15.439	1497	5666	444	0.26077	3.3094	2445	2521	10864	5898	0.4	0.0204345	C5	PTM	11519	0.530145
P2#alignments.possorted.tagged_BC01395_N02	P2	18.485	1895	6770	489	0.311953	4.10635	2764	2125	10851	5962	0.166667	0.0225325	C3	Sertoli cells	12159	0.560271
P2#alignments.possorted.tagged_BC00553_N01	P2	17.162	1508	5628	389	0.259522	3.61994	2539	2347	10843	5957	0.4	0.0179378	C6	Stroma	10761	0.496219
P2#alignments.possorted.tagged_BC00559_N01	P2	13.728	1539	6000	366	0.276906	4.02971	2724	2154	10834	5956	0.2	0.0168913	C5	PTM	12117	0.559212
P2#alignments.possorted.tagged_BC00585_N01	P2	16.613	1594	5921	480	0.273311	4.73729	2965	1888	10832	5979	0.233333	0.0221566	C5	PTM	12086	0.557884
P2#alignments.possorted.tagged_BC01348_N03	P2	23.832	2395	8392	567	0.387478	2.87858	1797	2792	10829	6240	5.43333	0.0261797	C8	Stroma	13442	0.620648
P2#alignments.possorted.tagged_BC02339_N03	P2	19.574	1977	7675	506	0.354373	3.55574	2412	2377	10829	6040	5.03333	0.0233632	C6	Stroma	12673	0.585142
P2#alignments.possorted.tagged_BC00601_N01	P2	18.18	1625	6176	454	0.285371	4.50967	3205	1964	10821	5652	1.6	0.0209777	C6	Stroma	11934	0.551428
P2#alignments.possorted.tagged_BC01764_N02	P2	18.179	1680	6394	468	0.295499	3.65935	2718	2322	10819	5779	0.0333333	0.0216286	C3	Sertoli cells	12020	0.555504
P2#alignments.possorted.tagged_BC00552_N01	P2	17.202	1416	5486	402	0.2537	3.07078	1596	2656	10812	6560	0.1	0.0185905	C4	Leydig cells	11386	0.526545
P2#alignments.possorted.tagged_BC01589_N02	P2	15.925	1898	7292	502	0.337343	2.76323	2502	2872	10808	5434	0.166667	0.0232235	C8	Macrophages	10912	0.504811
P2#alignments.possorted.tagged_BC02915_N03	P2	21.097	1971	7157	414	0.331435	3.03777	2026	2674	10797	6097	1.4	0.019172	C6	Stroma	12178	0.563953
P2#alignments.possorted.tagged_BC02936_N03	P2	18.73	1835	6861	494	0.317815	3.223	2296	2556	10794	5942	0.0666667	0.0228831	C3	Sertoli cells	12444	0.576431
P2#alignments.possorted.tagged_BC01491_N02	P2	19.909	2041	7376	586	0.342369	3.09582	2684	2630	10772	5458	0.266667	0.0272001	C8	Macrophages	11216	0.520609
P2#alignments.possorted.tagged_BC00574_N01	P2	19.266	1868	7187	571	0.333689	3.84653	2722	2222	10769	5825	4.8	0.0265113	C6	Stroma	12311	0.571594
P2#alignments.possorted.tagged_BC03296_N04	P2	21.114	1802	6626	441	0.307871	3.16447	1747	2584	10761	6430	0.533333	0.0204907	C6	Stroma	12178	0.56584
P2#alignments.possorted.tagged_BC02012_N03	P2	26.172	1890	7258	510	0.337487	3.21521	2386	2551	10753	5816	0.0666667	0.0237143	C3	Sertoli cells	12273	0.570678
P2#alignments.possorted.tagged_BC01055_N02	P2	16.901	1707	6370	457	0.296252	4.35142	2529	2009	10751	6213	1.86667	0.0212538	C5	PTM	12295	0.571807
P2#alignments.possorted.tagged_BC03511_N05	P2	24.341	2188	7740	464	0.360033	3.67551	2068	2299	10749	6382	4	0.0215834	C6	Stroma	12608	0.586473
P2#alignments.possorted.tagged_BC02926_N03	P2	20.527	1897	6844	511	0.318474	3.61952	1655	2326	10745	6764	2.03333	0.0237785	C6	Stroma	11984	0.557655
P2#alignments.possorted.tagged_BC01962_N02	P2	20.571	1953	7171	446	0.333814	4.21914	2694	2058	10741	5989	0.833333	0.0207616	C5	PTM	12524	0.583
P2#alignments.possorted.tagged_BC02952_N04	P2	24.71	2321	8140	449	0.379204	3.11857	1645	2606	10733	6482	5.16667	0.0209168	C6	Stroma	13605	0.633793
P2#alignments.possorted.tagged_BC00583_N01	P2	16.219	1548	5943	431	0.276908	4.29403	2635	2027	10731	6069	1.13333	0.020082	C6	Stroma	10966	0.51095
P2#alignments.possorted.tagged_BC02335_N03	P2	23.637	2077	7617	463	0.355304	2.62741	1725	2955	10719	6039	3.2	0.0215972	C5	PTM	13293	0.620067
P2#alignments.possorted.tagged_BC00606_N01	P2	21.367	2007	7316	454	0.341391	4.22683	2183	2050	10715	6482	1.66667	0.0211853	C5	PTM	12590	0.587494
P2#alignments.possorted.tagged_BC02527_N03	P2	25.228	2306	8226	476	0.383926	3.04875	1591	2646	10713	6476	0.966667	0.022216	C6	Stroma	13747	0.641604
P2#alignments.possorted.tagged_BC00593_N01	P2	18.055	1623	5943	406	0.277399	3.89803	2934	2187	10712	5591	0.133333	0.0189507	C5	PTM	11597	0.541309
P2#alignments.possorted.tagged_BC01245_N02	P2	19.387	1635	6049	453	0.282426	3.9169	2691	2178	10709	5840	1.7	0.0211504	C8	Macrophages	10686	0.498926
P2#alignments.possorted.tagged_BC00592_N01	P2	20.446	1714	6156	463	0.287583	3.54673	1892	2354	10703	6457	0.5	0.0216294	C6	Stroma	11488	0.536672
P2#alignments.possorted.tagged_BC00619_N01	P2	15.936	1690	6322	402	0.295669	4.88711	3352	1816	10691	5523	1.53333	0.0188009	C6	Stroma	11196	0.523618
P2#alignments.possorted.tagged_BC02993_N03	P2	21.982	1976	7355	442	0.343981	3.64019	2155	2304	10691	6232	3.4	0.0206716	C6	PTM	12931	0.604761
P2#alignments.possorted.tagged_BC00584_N01	P2	21.967	2019	7183	427	0.336	3.51394	2644	2368	10689	5677	1.13333	0.0199738	C5	PTM	12912	0.603985
P2#alignments.possorted.tagged_BC00566_N01	P2	18.232	1556	5854	453	0.273935	4.05919	2630	2112	10685	5943	0.633333	0.0211979	C5	PTM	11818	0.553018
P2#alignments.possorted.tagged_BC00588_N01	P2	23.774	1969	7045	535	0.329791	3.72611	2122	2260	10681	6299	0.8	0.0250445	C5	PTM	12229	0.572465
P2#alignments.possorted.tagged_BC02083_N03	P2	25.912	2290	7519	491	0.352079	1.83537	181	3766	10678	6731	0.2	0.0229912	C2	Vascular mural cells	12578	0.588968
P2#alignments.possorted.tagged_BC01978_N02	P2	27.02	2115	7606	409	0.356186	3.38841	2126	2433	10677	6118	0.4	0.0191533	C3	Sertoli cells	13109	0.61389
P2#alignments.possorted.tagged_BC01541_N02	P2	22.213	2165	8006	428	0.374988	2.72211	1812	2868	10675	5995	4.43333	0.0200468	C6	Stroma	12573	0.588899
P2#alignments.possorted.tagged_BC02981_N03	P2	23.851	2433	8625	461	0.404095	2.72496	2196	2865	10672	5611	3.03333	0.0215986	C6	Stroma	13577	0.636104
P2#alignments.possorted.tagged_BC00671_N02	P2	10.515	1216	5773	406	0.270499	3.19622	2627	2543	10671	5501	5.66667	0.0190235	C7	Vascular mural cells	11210	0.525255
P2#alignments.possorted.tagged_BC01500_N02	P2	23.107	1832	6791	416	0.318259	3.57112	2542	2334	10669	5793	1.06667	0.0194957	C5	PTM	11939	0.559518
P2#alignments.possorted.tagged_BC02782_N03	P2	22.867	2044	7235	482	0.339162	3.23422	2105	2519	10666	6042	2.3	0.0225952	C8	Neutrophils	12066	0.565629
P2#alignments.possorted.tagged_BC01286_N02	P2	23.125	2067	7327	505	0.343507	3.55575	2339	2341	10665	5985	5.5	0.0236756	C5	PTM	13002	0.609564
P2#alignments.possorted.tagged_BC00603_N01	P2	18.978	1773	7003	439	0.328594	3.14469	2357	2571	10656	5728	1.3	0.0205987	C5	PTM	12664	0.594219
P2#alignments.possorted.tagged_BC00615_N01	P2	20.417	1825	6929	469	0.325611	3.56456	2135	2331	10640	6174	0.633333	0.0220395	C6	Stroma	11982	0.563064
P2#alignments.possorted.tagged_BC00580_N01	P2	16.45	1379	5644	406	0.2653	3.76782	2748	2231	10637	5658	0	0.0190843	C5	PTM	11698	0.549873
P2#alignments.possorted.tagged_BC00958_N02	P2	25.031	2250	7959	474	0.374506	3.43119	2273	2398	10626	5955	1.03333	0.0223038	C6	Stroma	12967	0.610154
P2#alignments.possorted.tagged_BC01664_N02	P2	20.086	1978	7296	489	0.343632	3.69319	2091	2262	10616	6263	3.33333	0.0230313	C5	PTM	12687	0.597541
P2#alignments.possorted.tagged_BC00563_N01	P2	17.624	1335	5254	410	0.247503	3.31814	1874	2458	10614	6282	0.233333	0.0193141	C6	Stroma	10199	0.48045
P2#alignments.possorted.tagged_BC00581_N01	P2	23.166	1942	7138	484	0.336793	2.85626	1930	2748	10597	5919	1.56667	0.0228367	C5	PTM	12751	0.601633
P2#alignments.possorted.tagged_BC01376_N02	P2	20.85	1969	6967	472	0.328849	3.33252	2139	2445	10593	6009	0.133333	0.0222789	C3	Sertoli cells	12616	0.595488
P2#alignments.possorted.tagged_BC01584_N03	P2	21.63	1846	6973	446	0.329226	2.84532	1514	2754	10590	6322	0.366667	0.0210576	C5	PTM	12737	0.601369
P2#alignments.possorted.tagged_BC01742_N02	P2	19.268	1732	6245	457	0.294881	3.3956	2405	2409	10589	5775	0.766667	0.021579	C4	Leydig cells	11433	0.539853
P2#alignments.possorted.tagged_BC00945_N02	P2	18.087	1635	5985	433	0.283139	3.33689	2218	2437	10569	5914	0.133333	0.0204844	C3	Sertoli cells	11708	0.553884
P2#alignments.possorted.tagged_BC01819_N02	P2	19.375	1859	6912	446	0.327614	3.23655	2414	2490	10549	5645	0.7	0.0211394	C5	PTM	12730	0.603375
P2#alignments.possorted.tagged_BC00650_N01	P2	23.003	2091	7496	475	0.355395	4.97507	3422	1765	10546	5359	1.7	0.0225204	C6	Stroma	12885	0.610895
P2#alignments.possorted.tagged_BC00604_N01	P2	19.948	1642	6123	449	0.29041	3.89415	2821	2154	10542	5567	1.73333	0.0212958	C5	PTM	11569	0.54871
P2#alignments.possorted.tagged_BC00612_N01	P2	17.985	1544	5837	453	0.277003	3.33046	2405	2433	10536	5698	0.7	0.0214977	C5	PTM	10945	0.51941
P2#alignments.possorted.tagged_BC00631_N01	P2	19.1	1659	6189	440	0.293819	3.77642	2675	2205	10532	5652	2.5	0.0208887	C6	Stroma	11932	0.566464
P2#alignments.possorted.tagged_BC01610_N03	P2	24.984	2107	7390	454	0.350902	3.6164	1491	2281	10530	6758	4.03333	0.0215575	C5	PTM	12704	0.603229
P2#alignments.possorted.tagged_BC02664_N03	P2	24.882	2111	7535	461	0.358366	3.48507	2173	2344	10513	5996	0.0666667	0.0219252	C3	Sertoli cells	12184	0.579473
P2#alignments.possorted.tagged_BC03100_N03	P2	25.753	2393	8587	495	0.408555	2.78976	1984	2773	10509	5752	3.16667	0.0235512	C6	Stroma	13140	0.625178
P2#alignments.possorted.tagged_BC00627_N01	P2	22.137	1934	7158	461	0.34141	4.13873	2597	2040	10483	5846	4.86667	0.021988	C6	Stroma	12410	0.591911
P2#alignments.possorted.tagged_BC01244_N02	P2	19.676	1719	6552	461	0.312834	3.75352	2618	2203	10472	5651	4.76667	0.0220111	C8	Neutrophils	11174	0.533518
P2#alignments.possorted.tagged_BC01508_N02	P2	21.389	1739	6529	433	0.311855	3.57118	2480	2290	10468	5698	4.06667	0.0206821	C6	Stroma	12110	0.578429
P2#alignments.possorted.tagged_BC01721_N02	P2	20.797	2048	7221	491	0.344974	4.03173	2203	2080	10466	6183	2.1	0.0234569	C6	Stroma	12019	0.574193
P2#alignments.possorted.tagged_BC04512_N05	P2	19.248	2051	7347	480	0.351027	2.34452	616	3129	10465	6720	5.33333	0.0229336	C8	Innate lymph	13185	0.629957
P2#alignments.possorted.tagged_BC00618_N01	P2	20.709	1736	6654	443	0.318069	3.63037	2492	2259	10460	5709	0.866667	0.0211759	C6	Stroma	11965	0.571941
P2#alignments.possorted.tagged_BC00628_N01	P2	20.281	1567	5625	437	0.268907	4.26107	2690	1988	10459	5781	0.0666667	0.0208911	C3	Sertoli cells	10860	0.51917
P2#alignments.possorted.tagged_BC06813_N02	P2	22.904	2082	7574	503	0.362115	3.08995	1356	2557	10458	6545	1.53333	0.0240486	C3	Sertoli cells	13016	0.622299
P2#alignments.possorted.tagged_BC01147_N02	P2	21.883	1945	7212	493	0.345006	3.57218	2332	2286	10452	5834	2.5	0.023584	C5	PTM	12553	0.600507
P2#alignments.possorted.tagged_BC00623_N01	P2	19.216	1999	7316	500	0.350115	3.23339	2003	2468	10448	5977	1.5	0.023928	C6	Stroma	12467	0.596621
P2#alignments.possorted.tagged_BC00587_N01	P2	21.575	2081	7636	483	0.365464	2.76876	2021	2772	10447	5654	4.7	0.0231167	C6	Stroma	12334	0.590313
P2#alignments.possorted.tagged_BC01386_N02	P2	19.328	1630	6002	439	0.287397	4.03958	2626	2072	10442	5744	0.233333	0.0210209	C6	Stroma	10659	0.510391
P2#alignments.possorted.tagged_BC00941_N02	P2	21.806	1828	6640	444	0.31813	4.10068	2753	2046	10436	5637	0.1	0.0212725	C3	Sertoli cells	11737	0.562332
P2#alignments.possorted.tagged_BC03311_N04	P2	26.888	2254	7914	429	0.379205	2.52415	1308	2961	10435	6166	4.43333	0.0205558	C5	PTM	13558	0.649641
P2#alignments.possorted.tagged_BC01450_N02	P2	15.188	1488	5774	428	0.276692	3.99473	2436	2089	10434	5909	1.33333	0.0205099	C6	Stroma	11474	0.549837
P2#alignments.possorted.tagged_BC01668_N02	P2	24.196	2175	7665	496	0.367309	2.97334	1998	2626	10434	5810	0.133333	0.0237684	C3	Sertoli cells	12822	0.614434
P2#alignments.possorted.tagged_BC03046_N03	P2	19.79	1649	5964	461	0.285988	3.38662	1595	2377	10427	6455	1.63333	0.0221061	C6	Leydig cells	11139	0.534142
P2#alignments.possorted.tagged_BC01680_N02	P2	21.564	1775	6441	426	0.308921	4.42122	3066	1923	10425	5436	0.1	0.0204317	C3	Sertoli cells	11817	0.566763
P2#alignments.possorted.tagged_BC01981_N02	P2	17.869	1507	5695	391	0.273377	3.55046	2640	2289	10416	5487	0.6	0.0187692	C5	PTM	11477	0.550931
P2#alignments.possorted.tagged_BC03023_N03	P2	17.258	1621	5941	414	0.285543	3.6031	1164	2260	10403	6979	0.366667	0.0198981	C6	Stroma	11451	0.55037
P2#alignments.possorted.tagged_BC00647_N01	P2	21.024	1858	6784	460	0.326248	3.77584	2618	2177	10397	5602	1.83333	0.0221218	C6	Stroma	11137	0.535587
P2#alignments.possorted.tagged_BC01843_N02	P2	25.344	2227	8140	486	0.391534	2.9375	2005	2640	10395	5750	1.76667	0.0233766	C6	Stroma	13196	0.634728
P2#alignments.possorted.tagged_BC00608_N01	P2	16.573	1540	5703	364	0.274367	3.5424	2660	2288	10393	5445	0.0666667	0.0175118	C5	PTM	11750	0.565284
P2#alignments.possorted.tagged_BC01396_N02	P2	18.603	1644	6306	426	0.303436	3.4731	2492	2323	10391	5576	4.76667	0.0204985	C5	PTM	11946	0.574824
P2#alignments.possorted.tagged_BC01712_N02	P2	17.694	1528	5851	443	0.281596	3.9237	2711	2110	10389	5568	0.1	0.0213206	C3	Sertoli cells	11340	0.54577
P2#alignments.possorted.tagged_BC02836_N05	P2	26.591	2444	8762	511	0.421737	2.59198	1353	2892	10388	6143	3.76667	0.0245957	C6	Stroma	13490	0.649307
P2#alignments.possorted.tagged_BC00676_N01	P2	21.771	1869	6841	453	0.329496	4.23764	2590	1982	10381	5809	2.43333	0.0218187	C5	PTM	12461	0.600183
P2#alignments.possorted.tagged_BC00642_N01	P2	16.383	1514	5643	452	0.272057	4.06891	2804	2046	10371	5521	1.23333	0.0217915	C6	Stroma	11067	0.533555
P2#alignments.possorted.tagged_BC01278_N02	P2	17.065	1758	6869	435	0.331387	3.55961	2470	2273	10364	5621	1.16667	0.0209861	C6	Stroma	11986	0.578252
P2#alignments.possorted.tagged_BC01967_N02	P2	22.232	1729	6407	466	0.309158	3.20365	2224	2465	10362	5673	0.0333333	0.022486	C3	Sertoli cells	11884	0.573441
P2#alignments.possorted.tagged_BC02992_N03	P2	20.469	1933	7124	437	0.343822	3.53392	2129	2285	10360	5946	5.13333	0.0210907	C6	Stroma	12221	0.589817
P2#alignments.possorted.tagged_BC00660_N01	P2	17.132	1514	5862	412	0.282942	3.84745	2501	2137	10359	5721	3.03333	0.0198861	C6	Stroma	10576	0.510474
P2#alignments.possorted.tagged_BC02254_N03	P2	23.215	1993	7183	440	0.34677	3.17284	1963	2482	10357	5912	1.5	0.0212417	C6	Stroma	13073	0.631119
P2#alignments.possorted.tagged_BC00841_N02	P2	16.505	1742	6654	450	0.321574	3.32525	2353	2392	10346	5601	1.56667	0.0217475	C6	Stroma	12638	0.610767
P2#alignments.possorted.tagged_BC00643_N01	P2	22.247	1865	7195	411	0.347954	3.26879	2281	2422	10339	5636	0.933333	0.0198762	C6	Stroma	12322	0.595899
P2#alignments.possorted.tagged_BC00625_N01	P2	24.385	2155	7803	491	0.377394	3.01632	2103	2574	10338	5661	2.93333	0.0237473	C9	Endothelial cells	11749	0.568243
P2#alignments.possorted.tagged_BC02062_N03	P2	17.598	1573	6083	464	0.294291	3.39413	1980	2352	10335	6003	1.33333	0.022448	C5	PTM	11664	0.564296
P2#alignments.possorted.tagged_BC00653_N01	P2	21.326	1917	6895	501	0.333608	4.23506	2950	1974	10334	5410	3.7	0.0242404	C8	Innate lymph	11626	0.562512
P2#alignments.possorted.tagged_BC00607_N01	P2	7.84	487	2316	537	0.112079	3.26062	2972	2425	10332	4935	0.0333333	0.0259872	C6	Stroma	4509	0.218206
P2#alignments.possorted.tagged_BC00646_N01	P2	22.487	2010	7047	496	0.341028	3.66667	2626	2214	10332	5492	0.0666667	0.0240031	C3	Sertoli cells	12272	0.593883
P2#alignments.possorted.tagged_BC01254_N02	P2	27.118	1972	7195	422	0.348291	3.39532	2361	2350	10329	5618	0.633333	0.0204279	C5	PTM	12953	0.627021
P2#alignments.possorted.tagged_BC00610_N01	P2	18.398	1756	6778	468	0.328137	3.00932	2004	2576	10328	5748	1.06667	0.0226569	C6	Stroma	11869	0.574603
P2#alignments.possorted.tagged_BC01864_N02	P2	18.776	1555	5976	429	0.289395	4.06873	2602	2037	10325	5686	0.233333	0.0207748	C5	PTM	11768	0.569879
P2#alignments.possorted.tagged_BC02076_N02	P2	23.561	2225	7888	486	0.382059	3.50983	2390	2289	10323	5644	5.16667	0.0235397	C6	Stroma	12804	0.620169
P2#alignments.possorted.tagged_BC01968_N02	P2	24.658	1955	7154	482	0.346575	2.92135	1478	2632	10321	6211	3.76667	0.0233505	C5	PTM	12899	0.624891
P2#alignments.possorted.tagged_BC01855_N02	P2	14.587	1326	5088	396	0.247351	4.50589	2244	1868	10285	6173	0.4	0.0192513	C6	Stroma	10339	0.502625
P2#alignments.possorted.tagged_BC00651_N01	P2	20.58	1798	6653	384	0.323495	4.28961	3233	1944	10283	5106	0.166667	0.0186716	C3	Sertoli cells	11283	0.548624
P2#alignments.possorted.tagged_BC00850_N02	P2	20.386	1956	7115	463	0.346195	3.18574	2303	2455	10276	5518	2.7	0.0225282	C6	Stroma	12564	0.611327
P2#alignments.possorted.tagged_BC01513_N02	P2	19.085	1889	7158	401	0.348321	3.15319	2333	2474	10275	5468	1.23333	0.0195134	C6	Stroma	11722	0.570414
P2#alignments.possorted.tagged_BC01196_N02	P2	18.841	1922	7351	423	0.357817	3.38974	2464	2340	10272	5468	5.53333	0.02059	C6	Stroma	12416	0.604361
P2#alignments.possorted.tagged_BC01387_N02	P2	21.793	1948	7062	476	0.343884	3.50351	1844	2280	10268	6144	3.76667	0.0231788	C6	Stroma	12085	0.588479
P2#alignments.possorted.tagged_BC00652_N01	P2	16.413	1550	6084	445	0.296318	4.4117	2877	1897	10266	5492	0.333333	0.0216735	C6	Stroma	10990	0.535262
P2#alignments.possorted.tagged_BC01426_N02	P2	18.423	1563	6113	380	0.297992	3.59337	2551	2233	10257	5473	0.933333	0.0185239	C5	PTM	12050	0.587404
P2#alignments.possorted.tagged_BC00669_N01	P2	21.551	1861	6813	434	0.332212	3.46603	2241	2296	10254	5717	0.133333	0.0211625	C3	Sertoli cells	12033	0.586747
P2#alignments.possorted.tagged_BC03455_N04	P2	24.869	2135	7420	471	0.361845	3.23678	1955	2420	10253	5878	4.46667	0.0229689	C6	Stroma	13009	0.6344
P2#alignments.possorted.tagged_BC03406_N03	P2	21.23	1769	6178	481	0.301749	3.19721	1534	2439	10237	6264	0.933333	0.0234932	C5	PTM	11493	0.561346
P2#alignments.possorted.tagged_BC01141_N02	P2	23.577	1905	6620	427	0.323432	3.74675	2260	2156	10234	5818	2.13333	0.0208618	C5	PTM	11983	0.58545
P2#alignments.possorted.tagged_BC00633_N01	P2	18.197	1599	6094	454	0.29782	3.86727	2577	2102	10231	5552	0.166667	0.0221875	C3	Sertoli cells	11170	0.54589
P2#alignments.possorted.tagged_BC00659_N01	P2	19.192	1541	5928	402	0.289878	4.48257	2642	1865	10225	5718	2.03333	0.0196577	C6	Stroma	11102	0.542885
P2#alignments.possorted.tagged_BC03089_N03	P2	23.076	2016	7099	523	0.347377	3.55551	2447	2243	10218	5528	0.8	0.0255921	C6	Stroma	12088	0.591505
P2#alignments.possorted.tagged_BC02214_N03	P2	19.839	1603	6142	419	0.300666	3.7796	2275	2137	10214	5802	1.83333	0.0205111	C5	PTM	11521	0.563981
P2#alignments.possorted.tagged_BC00639_N01	P2	19.504	1635	6294	439	0.308137	3.45593	1783	2292	10213	6138	0	0.0214922	C3	Sertoli cells	11719	0.57373
P2#alignments.possorted.tagged_BC02739_N03	P2	25.272	2310	8232	452	0.403055	2.42685	1524	2980	10212	5708	0.9	0.0221308	C3	Sertoli cells	12054	0.590188
P2#alignments.possorted.tagged_BC01105_N02	P2	17.812	1772	6521	423	0.319375	3.1332	2193	2470	10209	5546	0.5	0.020717	C5	PTM	11802	0.578019
P2#alignments.possorted.tagged_BC01945_N03	P2	15.185	1411	5184	389	0.253968	3.91382	2534	2077	10206	5595	1.03333	0.0190574	C6	Stroma	10437	0.511317
P2#alignments.possorted.tagged_BC00675_N01	P2	16.388	1440	5631	429	0.275894	4.29031	2629	1929	10205	5647	0.1	0.0210191	C5	PTM	11462	0.561587
P2#alignments.possorted.tagged_BC01609_N02	P2	20.289	1875	6787	470	0.332631	4.31078	2563	1921	10202	5718	0.733333	0.0230347	C6	Stroma	11580	0.567536
P2#alignments.possorted.tagged_BC01754_N02	P2	14.948	1389	5014	476	0.245784	2.88128	1531	2628	10200	6041	0.433333	0.0233333	C6	Stroma	10012	0.490784
P2#alignments.possorted.tagged_BC00649_N01	P2	18.883	1459	5539	416	0.271546	4.02414	2615	2030	10199	5554	0.333333	0.0203942	C6	Stroma	11064	0.542406
P2#alignments.possorted.tagged_BC02439_N03	P2	25.187	1768	6220	371	0.304932	3.09598	1831	2490	10199	5878	0.0333333	0.0181881	C3	Sertoli cells	11543	0.565889
P2#alignments.possorted.tagged_BC02262_N03	P2	19.255	2042	7361	442	0.360975	2.29222	784	3097	10196	6315	4.06667	0.0216752	C6	Stroma	12929	0.634023
P2#alignments.possorted.tagged_BC03331_N03	P2	20.702	1955	7069	459	0.346758	3.1134	1799	2478	10193	5916	2.5	0.0225155	C5	PTM	12982	0.63681
P2#alignments.possorted.tagged_BC02018_N03	P2	21.346	1811	6717	438	0.329555	3.40216	2330	2315	10191	5546	0.7	0.0214895	C6	Stroma	11543	0.566333
P2#alignments.possorted.tagged_BC02285_N03	P2	14.387	1315	5160	420	0.253214	3.88916	2027	2084	10189	6078	0.3	0.0206105	C6	Stroma	10283	0.504613
P2#alignments.possorted.tagged_BC00702_N02	P2	14.713	1642	6302	435	0.309407	2.66859	2547	2776	10184	4861	0.366667	0.021357	C8	Macrophages	9909	0.486498
P2#alignments.possorted.tagged_BC03839_N04	P2	27.004	2291	7653	496	0.375847	2.73615	1363	2725	10181	6093	5.46667	0.0243591	C6	Stroma	12779	0.627591
P2#alignments.possorted.tagged_BC01977_N04	P2	16.965	1525	5876	410	0.288662	3.53565	1972	2244	10178	5962	0.433333	0.0201415	C5	PTM	12150	0.596876
P2#alignments.possorted.tagged_BC03152_N03	P2	19.535	1756	6310	442	0.310074	4.23944	1846	1942	10175	6387	0.633333	0.0217199	C5	PTM	11681	0.574005
P2#alignments.possorted.tagged_BC01555_N02	P2	18.182	1919	7135	468	0.350649	3.45642	2290	2283	10174	5601	0.9	0.0229998	C6	Stroma	12374	0.608119
P2#alignments.possorted.tagged_BC02848_N03	P2	18.149	2053	7277	594	0.357733	3.83873	2251	2102	10171	5818	1.43333	0.0292007	C8	Macrophages	10843	0.533035
P2#alignments.possorted.tagged_BC00679_N01	P2	16.856	1379	5285	416	0.260114	4.1464	2191	1974	10159	5994	0.9	0.0204745	C6	Stroma	10314	0.507629
P2#alignments.possorted.tagged_BC03173_N03	P2	21.221	2079	7484	459	0.36838	2.52097	1058	2885	10158	6215	2.53333	0.022593	C5	PTM	13152	0.647372
P2#alignments.possorted.tagged_BC00754_N02	P2	17.872	1778	6932	430	0.34131	3.60544	2558	2205	10155	5392	2.66667	0.0211718	C6	Stroma	11111	0.54707
P2#alignments.possorted.tagged_BC00645_N01	P2	21.806	1817	6720	436	0.330904	3.52899	2637	2242	10154	5275	1.3	0.0214694	C6	Stroma	11673	0.574798
P2#alignments.possorted.tagged_BC02229_N02	P2	21.666	1871	6751	452	0.332496	3.71528	2179	2153	10152	5820	1.46667	0.0222616	C5	PTM	12091	0.595498
P2#alignments.possorted.tagged_BC02038_N02	P2	16.891	1578	6229	469	0.306878	3.39161	2250	2311	10149	5588	1.06667	0.0231057	C6	Stroma	11080	0.545867
P2#alignments.possorted.tagged_BC02935_N03	P2	23.599	2026	7152	443	0.352385	2.8251	1671	2653	10148	5824	2.7	0.021827	C5	PTM	12210	0.601596
P2#alignments.possorted.tagged_BC01698_N02	P2	20.616	2051	7289	549	0.359206	4.36542	2546	1891	10146	5709	1	0.027055	C8	Macrophages	10359	0.510497
P2#alignments.possorted.tagged_BC02019_N02	P2	17.844	1577	6222	430	0.306926	3.42041	2240	2293	10136	5603	0.8	0.0212115	C6	Stroma	10986	0.54193
P2#alignments.possorted.tagged_BC03367_N05	P2	25.18	2238	7627	423	0.37627	2.1368	302	3231	10135	6602	3	0.0208683	C6	Stroma	13264	0.654366
P2#alignments.possorted.tagged_BC00685_N01	P2	22.092	1785	6571	416	0.324238	3.92371	2024	2058	10133	6051	1.26667	0.020527	C5	PTM	12222	0.603079
P2#alignments.possorted.tagged_BC02380_N04	P2	19.092	1668	5984	402	0.295419	3.35613	2090	2325	10128	5713	0.533333	0.019846	C5	PTM	11589	0.572127
P2#alignments.possorted.tagged_BC02218_N02	P2	16.696	1661	6078	360	0.300148	3.78723	2315	2115	10125	5695	0.7	0.0177778	C6	Stroma	11016	0.544
P2#alignments.possorted.tagged_BC00662_N01	P2	18.831	1512	5511	442	0.272229	3.77453	2954	2120	10122	5048	0.7	0.0218336	C5	PTM	10285	0.508052
P2#alignments.possorted.tagged_BC01418_N02	P2	24.459	1791	6433	439	0.31793	3.64509	2120	2178	10117	5819	3.36667	0.0216962	C5	PTM	11744	0.580409
P2#alignments.possorted.tagged_BC01621_N02	P2	19.735	1475	5601	370	0.276866	3.59773	2519	2200	10115	5396	0.366667	0.0182897	C5	PTM	11135	0.55042
P2#alignments.possorted.tagged_BC01951_N02	P2	21.488	1606	5898	433	0.291547	3.99013	2398	2027	10115	5690	1.53333	0.0214039	C5	PTM	10605	0.524221
P2#alignments.possorted.tagged_BC02206_N02	P2	17.602	1440	5548	396	0.2743	4.1283	2865	1972	10113	5276	0.266667	0.0195788	C6	Stroma	11729	0.579897
P2#alignments.possorted.tagged_BC01381_N02	P2	14.753	1423	5546	364	0.274283	3.48536	2359	2254	10110	5497	0.366667	0.018002	C5	PTM	11067	0.547329
P2#alignments.possorted.tagged_BC00667_N01	P2	19.055	1530	5606	387	0.277333	3.55681	2741	2218	10107	5148	0.466667	0.0191451	C5	PTM	11107	0.549471
P2#alignments.possorted.tagged_BC00674_N01	P2	24.315	1584	5860	402	0.289984	3.64338	2419	2176	10104	5509	3.6	0.0198931	C8	Innate lymph	10484	0.518804
P2#alignments.possorted.tagged_BC02141_N03	P2	15.863	1474	5831	403	0.288606	2.56583	2301	2833	10102	4968	0.1	0.0199465	C8	Macrophages	10095	0.499654
P2#alignments.possorted.tagged_BC01043_N02	P2	26.733	2295	8099	480	0.40102	3.32648	2095	2334	10098	5669	1.53333	0.0237671	C6	Stroma	12787	0.633145
P2#alignments.possorted.tagged_BC02201_N03	P2	15.794	1324	5158	377	0.255397	3.52825	1866	2230	10098	6002	3.23333	0.0186671	C4	Leydig cells	10224	0.506239
P2#alignments.possorted.tagged_BC01817_N02	P2	17.629	1460	5469	412	0.270823	4.0159	2196	2013	10097	5888	1.26667	0.0204021	C6	Stroma	10971	0.54328
P2#alignments.possorted.tagged_BC02173_N02	P2	25.503	2125	7465	556	0.369701	3.24737	1972	2377	10096	5747	5.73333	0.0275357	C8	Neutrophils	11913	0.589986
P2#alignments.possorted.tagged_BC02096_N02	P2	18.326	1527	5548	436	0.274871	3.4419	2083	2272	10092	5737	0.133333	0.0216013	C5	Stroma	11072	0.548553
P2#alignments.possorted.tagged_BC01834_N03	P2	21.475	1746	6302	392	0.31232	3.57551	2147	2205	10089	5737	0.1	0.0194271	C3	Sertoli cells	11708	0.580236
P2#alignments.possorted.tagged_BC02453_N03	P2	24.276	1986	7409	490	0.367182	2.37425	1828	2990	10089	5271	3.66667	0.0242839	C6	Stroma	11975	0.593468
P2#alignments.possorted.tagged_BC00741_N02	P2	21.989	1810	6617	445	0.327964	3.70303	2108	2145	10088	5835	1.1	0.0220559	C6	Stroma	11245	0.557345
P2#alignments.possorted.tagged_BC00661_N01	P2	15.998	1632	6688	554	0.331516	2.72077	1779	2711	10087	5597	0.366667	0.0274611	C6	Stroma	11406	0.565381
P2#alignments.possorted.tagged_BC02069_N02	P2	18.365	1725	6272	415	0.310926	3.22185	2472	2389	10086	5225	0.9	0.0205731	C6	Stroma	11744	0.582193
P2#alignments.possorted.tagged_BC02387_N03	P2	18.41	1534	5814	443	0.288651	4.14877	2266	1956	10071	5849	1.03333	0.0219938	C6	Stroma	11009	0.546569
P2#alignments.possorted.tagged_BC03078_N03	P2	22.232	1830	6433	426	0.319478	3.29156	1272	2346	10068	6450	2.53333	0.0211561	C5	PTM	11559	0.574046
P2#alignments.possorted.tagged_BC04118_N04	P2	22.02	2035	7180	456	0.356752	2.85408	808	2611	10063	6644	1	0.0226573	C6	Stroma	12672	0.629633
P2#alignments.possorted.tagged_BC00690_N01	P2	20.88	1550	5761	361	0.28656	4.25457	2933	1913	10052	5206	0.5	0.0179566	C5	PTM	11235	0.558844
P2#alignments.possorted.tagged_BC01080_N02	P2	21.178	1754	6233	426	0.31013	3.21695	1939	2383	10049	5727	0.0333333	0.0211961	C3	Sertoli cells	11712	0.582745
P2#alignments.possorted.tagged_BC02807_N03	P2	17.544	1577	6004	399	0.298736	3.85928	2166	2068	10049	5815	0.3	0.0198527	C6	Stroma	11449	0.569659
P2#alignments.possorted.tagged_BC01296_N02	P2	20.044	1822	6784	481	0.337613	3.55027	1860	2208	10047	5979	0.833333	0.0239375	C6	Stroma	11382	0.566438
P2#alignments.possorted.tagged_BC02476_N03	P2	23.018	2104	7549	404	0.375984	3.18815	1969	2397	10039	5673	3.43333	0.0201215	C6	Stroma	12469	0.621028
P2#alignments.possorted.tagged_BC04792_N05	P2	25.295	2146	7241	443	0.360751	2.99204	675	2514	10036	6847	3.66667	0.0220705	C6	Stroma	12915	0.643434
P2#alignments.possorted.tagged_BC00673_N01	P2	19.312	1775	6423	413	0.32003	3.52027	2446	2220	10035	5369	0	0.020578	C3	Sertoli cells	11416	0.568809
P2#alignments.possorted.tagged_BC02475_N03	P2	15.474	1516	5792	394	0.288619	3.54027	2066	2210	10034	5758	0.266667	0.0196332	C5	PTM	11077	0.551973
P2#alignments.possorted.tagged_BC01358_N02	P2	21.829	1852	6668	436	0.332635	3.30541	2224	2328	10023	5471	2.1	0.02175	C6	Stroma	11105	0.553976
P2#alignments.possorted.tagged_BC01785_N02	P2	20.701	1819	6923	432	0.345666	2.94097	2238	2541	10014	5235	1.6	0.0215698	C6	Stroma	11905	0.594418
P2#alignments.possorted.tagged_BC01567_N02	P2	18.377	1689	6373	427	0.3183	4.28285	2631	1895	10011	5485	0	0.0213265	C3	Sertoli cells	11117	0.555239
P2#alignments.possorted.tagged_BC00857_N02	P2	21.502	1922	6717	409	0.336287	3.2157	1510	2369	9987	6108	2.16667	0.0204766	C5	PTM	11838	0.59267
P2#alignments.possorted.tagged_BC01982_N02	P2	19.997	1333	5424	420	0.271743	4.18981	2364	1923	9980	5693	0.8	0.0210421	C6	Stroma	10522	0.527154
P2#alignments.possorted.tagged_BC00693_N01	P2	20.291	1660	6084	493	0.304871	4.58679	2283	1786	9978	5909	1.76667	0.0247043	C6	Stroma	10991	0.550762
P2#alignments.possorted.tagged_BC00706_N01	P2	21.011	1772	6591	418	0.330409	3.85117	2156	2056	9974	5762	5.33333	0.0209545	C6	Stroma	11653	0.584169
P2#alignments.possorted.tagged_BC01356_N02	P2	23.014	1906	6983	482	0.350201	3.16632	1932	2393	9970	5645	4.1	0.0241725	C5	PTM	11646	0.584052
P2#alignments.possorted.tagged_BC00689_N01	P2	18.53	1544	6188	452	0.310487	3.63273	2517	2151	9965	5297	0	0.0226794	C3	Sertoli cells	11553	0.579679
P2#alignments.possorted.tagged_BC01708_N02	P2	18.769	1526	5756	404	0.289101	3.86321	2240	2047	9955	5668	0.433333	0.0202913	C6	Stroma	10674	0.536113
P2#alignments.possorted.tagged_BC00656_N01	P2	15.898	1397	5096	364	0.256003	2.38768	1397	2938	9953	5618	0.0333333	0.0182859	C4	Leydig cells	10624	0.533708
P2#alignments.possorted.tagged_BC00654_N01	P2	16.774	1601	6035	448	0.303358	2.21182	1502	3097	9947	5348	1.5	0.0225194	C6	Stroma	10901	0.547954
P2#alignments.possorted.tagged_BC01937_N03	P2	20.527	1783	6426	473	0.323077	2.62427	1149	2744	9945	6052	1.66667	0.0237808	C5	PTM	11938	0.600201
P2#alignments.possorted.tagged_BC03319_N04	P2	24.029	1893	6467	416	0.325171	2.97442	1256	2502	9944	6186	1.1	0.0209171	C5	PTM	11765	0.591563
P2#alignments.possorted.tagged_BC01902_N02	P2	25.433	2299	8161	517	0.41072	3.31207	2146	2304	9935	5485	3	0.0260191	C6	Stroma	12443	0.62622
P2#alignments.possorted.tagged_BC00713_N01	P2	21.11	1791	6651	441	0.335131	3.9516	2535	2004	9923	5384	2.93333	0.0222211	C5	PTM	11709	0.589993
P2#alignments.possorted.tagged_BC04491_N04	P2	26.484	2287	7889	450	0.397511	2.8792	1460	2558	9923	5905	4.53333	0.0226746	C5	PTM	12853	0.647637
P2#alignments.possorted.tagged_BC02016_N02	P2	19.712	1533	5563	390	0.280393	3.63768	2416	2139	9920	5365	0.4	0.0196573	C5	PTM	11256	0.567339
P2#alignments.possorted.tagged_BC03102_N04	P2	24.823	2106	7726	408	0.38973	2.09557	969	3202	9912	5741	1.56667	0.0205811	C6	Stroma	12758	0.643563
P2#alignments.possorted.tagged_BC02260_N03	P2	15.779	1522	5953	488	0.300505	4.04585	2210	1963	9905	5732	1.4	0.024634	C6	Stroma	11004	0.555477
P2#alignments.possorted.tagged_BC00724_N01	P2	21.551	1676	6153	449	0.310695	4.4798	2677	1807	9902	5418	1.03333	0.0226722	C6	Stroma	10612	0.535851
P2#alignments.possorted.tagged_BC01974_N02	P2	15.821	1534	5894	404	0.297918	3.2804	1394	2311	9892	6187	0.366667	0.0204205	C6	Stroma	11046	0.55833
P2#alignments.possorted.tagged_BC03249_N03	P2	24.529	1759	6448	427	0.325953	3.03714	2109	2450	9891	5332	1.66667	0.0215853	C5	PTM	11755	0.594227
P2#alignments.possorted.tagged_BC03833_N03	P2	23.917	2017	7093	429	0.358667	3.33304	1893	2282	9888	5713	0.1	0.021693	C3	Sertoli cells	12114	0.612561
P2#alignments.possorted.tagged_BC02314_N02	P2	18.51	1533	5659	413	0.286213	3.98538	2487	1983	9886	5416	0.833333	0.0208881	C3	Sertoli cells	10613	0.536769
P2#alignments.possorted.tagged_BC03409_N04	P2	20.737	1686	6196	395	0.313436	2.57857	597	2762	9884	6525	1.3	0.0199818	C5	PTM	11651	0.589387
P2#alignments.possorted.tagged_BC00709_N01	P2	18.428	1703	6422	434	0.324967	3.4151	2314	2238	9881	5329	0.333333	0.0219613	C5	PTM	11446	0.579192
P2#alignments.possorted.tagged_BC02224_N02	P2	24.731	1761	6609	489	0.334565	3.56002	2380	2166	9877	5331	0.833333	0.0247545	C5	PTM	11695	0.592032
P2#alignments.possorted.tagged_BC00711_N01	P2	21.347	1865	6899	406	0.349281	3.63662	2081	2130	9876	5665	0.9	0.0205549	C5	PTM	12133	0.614267
P2#alignments.possorted.tagged_BC03079_N03	P2	21.152	1880	6764	433	0.34262	3.21477	1937	2342	9871	5592	4	0.0219329	C6	Stroma	11889	0.602219
P2#alignments.possorted.tagged_BC00696_N01	P2	20.721	1758	6623	435	0.335546	3.4375	2367	2224	9869	5278	1.53333	0.0220387	C5	PTM	11345	0.57478
P2#alignments.possorted.tagged_BC01760_N02	P2	17.787	1527	5575	375	0.282507	3.78284	2653	2063	9867	5151	0.1	0.0190027	C5	PTM	11014	0.558123
P2#alignments.possorted.tagged_BC00597_N01	P2	13.435	787	2980	500	0.1511	2.46974	2329	2842	9861	4690	0.2	0.0253524	C1	Neutrophils	4910	0.248961
P2#alignments.possorted.tagged_BC01899_N02	P2	22.97	1856	6667	421	0.338186	3.52363	1636	2179	9857	6042	0.333333	0.0213554	C3	Sertoli cells	11182	0.567211
P2#alignments.possorted.tagged_BC02717_N03	P2	23.271	1798	6402	388	0.324843	3.36404	1954	2258	9854	5642	4.83333	0.0196874	C5	PTM	12058	0.611833
P2#alignments.possorted.tagged_BC00704_N01	P2	17.318	1408	5470	403	0.277609	4.2516	2234	1876	9852	5742	1.63333	0.0204527	C6	Stroma	10842	0.550244
P2#alignments.possorted.tagged_BC00739_N01	P2	17.254	1551	5815	378	0.295358	4.10846	2053	1927	9844	5864	1.7	0.0191995	C4	Leydig cells	10250	0.520622
P2#alignments.possorted.tagged_BC00715_N01	P2	24.356	1968	7246	508	0.368079	3.29076	1837	2294	9843	5712	3.5	0.0258051	C6	Stroma	12023	0.610739
P2#alignments.possorted.tagged_BC00708_N01	P2	26.615	1922	7076	393	0.359662	3.39741	2014	2237	9837	5586	1.5	0.0199756	C5	PTM	12473	0.633984
P2#alignments.possorted.tagged_BC01659_N02	P2	19.428	1609	5892	450	0.299542	4.46693	2259	1799	9835	5777	1.43333	0.0228775	C6	Stroma	10798	0.548958
P2#alignments.possorted.tagged_BC00686_N01	P2	19.166	1568	6126	437	0.311629	3.71641	2451	2084	9829	5294	4.33333	0.0222301	C6	Stroma	11022	0.560688
P2#alignments.possorted.tagged_BC00719_N01	P2	20.205	1653	6124	359	0.311591	3.27447	2301	2299	9827	5227	2	0.018266	C5	PTM	11222	0.570978
P2#alignments.possorted.tagged_BC01656_N03	P2	27.957	2386	8116	514	0.412944	2.43002	467	2865	9827	6495	4.66667	0.0261524	C5	PTM	13095	0.666277
P2#alignments.possorted.tagged_BC03238_N03	P2	21.881	1989	7446	404	0.378854	2.89497	1420	2523	9827	5884	2.03333	0.0205556	C5	PTM	12957	0.659255
P2#alignments.possorted.tagged_BC00697_N01	P2	16.002	1398	5522	360	0.281018	4.27375	2812	1863	9825	5150	0.433333	0.0183206	C5	PTM	11089	0.564326
P2#alignments.possorted.tagged_BC03619_N03	P2	24.117	1973	6953	490	0.354239	3.59888	2146	2134	9814	5534	1.26667	0.0249643	C5	PTM	11883	0.605411
P2#alignments.possorted.tagged_BC01476_N02	P2	22.68	1844	6818	448	0.347573	2.98375	1960	2462	9808	5386	0.733333	0.0228385	C5	PTM	11880	0.605628
P2#alignments.possorted.tagged_BC01324_N02	P2	20.103	1604	5880	378	0.3	3.68451	2464	2092	9800	5244	0.5	0.0192857	C5	PTM	11249	0.573929
P2#alignments.possorted.tagged_BC00718_N01	P2	16.145	1492	5486	398	0.279984	3.86203	2222	2015	9797	5560	0.633333	0.0203123	C5	PTM	10650	0.543534
P2#alignments.possorted.tagged_BC02145_N02	P2	18.707	1521	5987	412	0.305553	3.59091	2493	2134	9797	5170	0.3	0.0210268	C5	PTM	11127	0.567878
P2#alignments.possorted.tagged_BC01830_N02	P2	18.236	1805	6773	445	0.345808	3.26524	1938	2296	9793	5559	2.73333	0.0227203	C6	Stroma	11519	0.588124
P2#alignments.possorted.tagged_BC02071_N02	P2	17.965	1506	5879	420	0.300347	3.98574	2546	1963	9787	5278	0.866667	0.021457	C6	Stroma	10703	0.546797
P2#alignments.possorted.tagged_BC01641_N02	P2	18.335	1500	5471	431	0.279561	3.0568	2287	2412	9785	5086	0.133333	0.0220235	C5	PTM	11145	0.569494
P2#alignments.possorted.tagged_BC00692_N01	P2	17.068	1517	5981	446	0.305652	3.09715	2154	2388	9784	5242	0.633333	0.0227923	C6	Stroma	10495	0.536335
P2#alignments.possorted.tagged_BC00705_N01	P2	18.652	1460	5539	411	0.283267	4.22555	2296	1871	9777	5610	0.433333	0.0210187	C6	Stroma	10164	0.519791
P2#alignments.possorted.tagged_BC00762_N01	P2	21.523	1663	5928	526	0.303191	4.44624	2751	1795	9776	5230	4.6	0.0269026	C8	Macrophages	10511	0.537592
P2#alignments.possorted.tagged_BC00712_N01	P2	19.181	1637	6393	416	0.327242	4.05329	2231	1933	9768	5604	1.9	0.021294	C6	Stroma	10986	0.562346
P2#alignments.possorted.tagged_BC00698_N01	P2	18.582	1539	6026	425	0.308488	3.67321	2583	2090	9767	5094	2.43333	0.0217569	C5	PTM	10939	0.559998
P2#alignments.possorted.tagged_BC02207_N03	P2	15.102	1388	5334	340	0.273062	4.26239	2094	1856	9767	5817	0.166667	0.0174055	C5	PTM	10809	0.553343
P2#alignments.possorted.tagged_BC01998_N03	P2	22.065	1716	6400	445	0.328104	3.44126	2140	2196	9753	5417	0.133333	0.0228135	C3	Sertoli cells	11420	0.585461
P2#alignments.possorted.tagged_BC03099_N04	P2	24.955	2155	7514	451	0.385254	3.21435	1682	2314	9752	5756	1.3	0.0231235	C5	PTM	13086	0.670939
P2#alignments.possorted.tagged_BC02746_N03	P2	24.054	2065	7238	407	0.371294	3.03937	1742	2413	9747	5592	3.46667	0.0208782	C6	Stroma	12220	0.62686
P2#alignments.possorted.tagged_BC01291_N02	P2	21.745	1757	6283	410	0.322702	3.69836	2113	2072	9735	5550	0.966667	0.021058	C5	PTM	11198	0.575141
P2#alignments.possorted.tagged_BC00736_N01	P2	16.368	1554	5705	395	0.293105	4.75517	2922	1691	9732	5119	1.83333	0.0202939	C5	PTM	11004	0.565351
P2#alignments.possorted.tagged_BC01112_N02	P2	26.548	1944	7245	391	0.372226	3.08564	2036	2382	9732	5314	2.96667	0.0200884	C6	Stroma	11944	0.613646
P2#alignments.possorted.tagged_BC01612_N02	P2	18.244	1382	5204	429	0.267365	4.01908	1924	1939	9732	5869	0.3	0.0220407	C6	Stroma	9769	0.501901
P2#alignments.possorted.tagged_BC03586_N03	P2	22.298	1644	6140	402	0.315454	3.17503	1974	2331	9732	5427	0.866667	0.0206535	C5	PTM	11697	0.600956
P2#alignments.possorted.tagged_BC02247_N02	P2	15.43	1387	5405	426	0.277721	4.14052	2128	1893	9731	5710	1.76667	0.0218888	C4	Leydig cells	10116	0.519782
P2#alignments.possorted.tagged_BC03517_N03	P2	27.241	2036	7278	410	0.374152	3.15819	2046	2339	9726	5341	3.33333	0.0210775	C5	PTM	12445	0.63978
P2#alignments.possorted.tagged_BC03486_N03	P2	17.833	1657	6027	397	0.309935	3.5371	1834	2143	9723	5746	4.66667	0.0204155	C6	Stroma	11330	0.582639
P2#alignments.possorted.tagged_BC00758_N01	P2	16.373	1447	5647	425	0.290753	4.44034	2806	1785	9711	5120	3.83333	0.0218824	C6	Stroma	10439	0.537483
P2#alignments.possorted.tagged_BC02388_N02	P2	19.824	1762	6600	399	0.339961	3.62238	2051	2100	9707	5556	3.3	0.0205522	C6	Stroma	11816	0.608633
P2#alignments.possorted.tagged_BC00782_N01	P2	20.34	1551	5940	385	0.306028	5.0505	2743	1604	9705	5358	1.2	0.0198351	C5	PTM	10956	0.564451
P2#alignments.possorted.tagged_BC02652_N03	P2	22.354	1603	5931	430	0.305974	3.84116	1685	2002	9692	6005	1.86667	0.0221832	C6	Stroma	10853	0.559895
P2#alignments.possorted.tagged_BC00889_N02	P2	18.56	1509	5696	416	0.293942	4.16196	2544	1877	9689	5268	0.266667	0.0214676	C5	PTM	11069	0.571215
P2#alignments.possorted.tagged_BC02030_N02	P2	18.47	1567	5699	358	0.294096	3.48981	2597	2158	9689	4934	1	0.0184746	C5	PTM	11101	0.572866
P2#alignments.possorted.tagged_BC00720_N01	P2	19.339	1504	5698	394	0.294136	3.70194	2153	2060	9686	5473	2.43333	0.0203386	C6	Stroma	10504	0.542226
P2#alignments.possorted.tagged_BC02778_N03	P2	23.522	1960	6833	431	0.352762	2.94662	1741	2454	9685	5490	1.23333	0.0222509	C5	PTM	12178	0.628704
P2#alignments.possorted.tagged_BC02294_N03	P2	18.08	1680	6009	384	0.310382	3.12617	2074	2346	9680	5260	4.4	0.0198347	C8	Neutrophils	10612	0.54814
P2#alignments.possorted.tagged_BC04115_N04	P2	26.527	2063	6994	412	0.36126	3.14384	1322	2336	9680	6022	1.56667	0.021281	C6	Stroma	11319	0.584659
P2#alignments.possorted.tagged_BC02851_N03	P2	24.822	2131	7377	443	0.381201	3.43853	1707	2180	9676	5789	1.36667	0.0228917	C6	Stroma	12277	0.634405
P2#alignments.possorted.tagged_BC00703_N01	P2	25.781	2005	7316	467	0.378166	2.76089	2080	2572	9673	5021	4.76667	0.0241394	C6	Stroma	11580	0.598573
P2#alignments.possorted.tagged_BC01578_N02	P2	17.442	1471	5346	356	0.276336	3.89277	2383	1977	9673	5313	1.73333	0.0184017	C6	Stroma	10387	0.536907
P2#alignments.possorted.tagged_BC03044_N03	P2	25.636	2162	7682	440	0.397126	2.77813	1432	2560	9672	5680	3.86667	0.0227461	C6	Stroma	12485	0.64542
P2#alignments.possorted.tagged_BC03456_N03	P2	22.434	1824	6639	420	0.343243	3.07029	1775	2376	9671	5520	0.366667	0.0217144	C5	PTM	11844	0.612346
P2#alignments.possorted.tagged_BC00776_N01	P2	24.942	1839	6799	392	0.351551	3.47064	2164	2163	9670	5343	0.0333333	0.0202689	C3	Sertoli cells	11466	0.592865
P2#alignments.possorted.tagged_BC04561_N04	P2	25.893	2406	7562	439	0.391246	2.30846	209	2921	9664	6534	5.23333	0.0227132	C6	PTM	12957	0.670375
P2#alignments.possorted.tagged_BC00998_N02	P2	22.274	1586	5805	401	0.300404	4.1421	2376	1879	9662	5407	0.5	0.0207514	C5	PTM	10864	0.562202
P2#alignments.possorted.tagged_BC03557_N03	P2	17.121	1271	5004	390	0.258979	3.35573	1871	2218	9661	5572	1.66667	0.0201842	C6	Stroma	9870	0.510817
P2#alignments.possorted.tagged_BC01919_N02	P2	16.74	1640	6103	419	0.315923	4.24946	2455	1840	9659	5364	1.9	0.0216896	C5	PTM	10935	0.566052
P2#alignments.possorted.tagged_BC01887_N02	P2	17.898	1654	6009	416	0.311218	3.827	2568	2000	9654	5086	0.333333	0.0215455	C3	Sertoli cells	11064	0.573027
P2#alignments.possorted.tagged_BC01601_N02	P2	19.109	1544	6002	375	0.31092	3.46852	2515	2160	9652	4977	0.6	0.019426	C6	Stroma	10541	0.546053
P2#alignments.possorted.tagged_BC00748_N01	P2	20.331	1499	5408	386	0.280207	4.52059	2848	1748	9650	5054	1.1	0.02	C6	Stroma	10348	0.536166
P2#alignments.possorted.tagged_BC00731_N01	P2	18.311	1461	5521	356	0.286151	3.81868	2391	2002	9647	5254	2.26667	0.0184513	C6	Stroma	10419	0.540012
P2#alignments.possorted.tagged_BC01488_N02	P2	18.978	1658	6309	440	0.327128	2.58876	1590	2687	9643	5366	2.8	0.0228145	C6	Stroma	9726	0.504304
P2#alignments.possorted.tagged_BC00799_N01	P2	16.395	1333	5139	337	0.266518	4.49345	2288	1755	9641	5598	0.7	0.0174774	C4	Leydig cells	10040	0.520693
P2#alignments.possorted.tagged_BC03469_N03	P2	24.295	1963	7294	424	0.378398	3.42313	1795	2179	9638	5664	4.03333	0.0219963	C6	PTM	11916	0.618178
P2#alignments.possorted.tagged_BC03151_N03	P2	5.799	287	1548	407	0.0803238	3.46939	2669	2156	9636	4811	0	0.0211187	C1	Neutrophils	2886	0.149751
P2#alignments.possorted.tagged_BC00757_N01	P2	20.171	1477	5638	382	0.292579	3.32451	2427	2228	9635	4980	5.46667	0.0198236	C8	Neutrophils	10124	0.525376
P2#alignments.possorted.tagged_BC00717_N01	P2	18.574	1679	6273	466	0.325667	2.73729	1833	2577	9631	5221	0.8	0.0241927	C6	Stroma	10984	0.570242
P2#alignments.possorted.tagged_BC00695_N01	P2	24.073	2091	7330	459	0.380582	2.50948	1676	2744	9630	5210	3.36667	0.0238318	C6	Stroma	11851	0.615317
P2#alignments.possorted.tagged_BC03899_N05	P2	23.955	1863	6442	407	0.334684	2.82208	772	2518	9624	6334	0.2	0.0211451	C3	Sertoli cells	11184	0.581047
P2#alignments.possorted.tagged_BC00793_N01	P2	18.798	1386	5370	387	0.279251	4.27138	2174	1824	9615	5617	0.2	0.0201248	C6	Stroma	10220	0.531461
P2#alignments.possorted.tagged_BC03941_N03	P2	25.901	2132	7523	416	0.391212	3.11777	1677	2335	9615	5603	4.63333	0.0216329	C8	Stroma	11908	0.619241
P2#alignments.possorted.tagged_BC00780_N01	P2	19.867	1525	5704	382	0.296651	4.49058	2507	1751	9614	5356	1.53333	0.0198669	C5	PTM	10765	0.559861
P2#alignments.possorted.tagged_BC03180_N03	P2	15.702	1467	5560	410	0.289162	4.06	2430	1900	9614	5284	0.233333	0.0213231	C5	PTM	11195	0.582224
P2#alignments.possorted.tagged_BC03678_N03	P2	22.005	1578	5683	422	0.295589	3.27055	1842	2251	9613	5520	4.76667	0.0219494	C5	PTM	10830	0.5633
P2#alignments.possorted.tagged_BC02929_N03	P2	16.79	1594	5605	419	0.291623	3.02935	1151	2385	9610	6074	1.5	0.0218002	C5	PTM	11365	0.591311
P2#alignments.possorted.tagged_BC00789_N01	P2	19.635	1646	6148	421	0.320042	3.43035	2109	2168	9605	5328	2.5	0.0219157	C6	Stroma	10691	0.556533
P2#alignments.possorted.tagged_BC02044_N02	P2	19.533	1598	5679	404	0.295627	3.67397	2363	2055	9605	5187	0.6	0.0210307	C5	PTM	10938	0.569391
P2#alignments.possorted.tagged_BC01582_N02	P2	19.347	1700	5932	398	0.309055	3.68832	2356	2047	9597	5194	0.666667	0.0207356	C5	PTM	10764	0.5608
P2#alignments.possorted.tagged_BC00809_N01	P2	17.889	1337	4978	341	0.259406	4.22603	2501	1836	9595	5258	0	0.0177697	C3	Sertoli cells	9958	0.518916
P2#alignments.possorted.tagged_BC00722_N01	P2	23.648	1660	6000	410	0.312858	3.52525	1991	2119	9589	5479	4.6	0.0213787	C5	Stroma	10855	0.566013
P2#alignments.possorted.tagged_BC03685_N03	P2	21.895	1946	6750	429	0.352186	2.20716	1092	2988	9583	5503	4.33333	0.0223834	C5	PTM	11577	0.604038
P2#alignments.possorted.tagged_BC00775_N01	P2	15.696	1506	5687	451	0.296785	4.61277	2237	1707	9581	5637	1.83333	0.0235362	C8	Macrophages	8521	0.444682
P2#alignments.possorted.tagged_BC00765_N01	P2	18.323	1388	5204	368	0.271636	3.6253	2158	2071	9579	5350	0.1	0.0192087	C3	Sertoli cells	10022	0.523123
P2#alignments.possorted.tagged_BC01793_N02	P2	25.453	1761	6449	370	0.336727	3.88322	2425	1961	9576	5190	0.633333	0.0193191	C3	Sertoli cells	11259	0.587876
P2#alignments.possorted.tagged_BC00784_N01	P2	15.972	1468	5956	374	0.311148	3.67562	2328	2047	9571	5196	2.93333	0.0195382	C6	Stroma	10662	0.556995
P2#alignments.possorted.tagged_BC00772_N01	P2	17.455	1331	5120	346	0.267531	3.74182	2473	2018	9569	5078	0.2	0.0180792	C5	PTM	10163	0.531038
P2#alignments.possorted.tagged_BC02340_N02	P2	20.478	1727	6418	376	0.335424	3.93653	2358	1938	9567	5271	4.26667	0.0196509	C6	Stroma	11075	0.578813
P2#alignments.possorted.tagged_BC02336_N02	P2	22.982	1973	7133	437	0.372909	3.36513	1847	2191	9564	5526	3.6	0.0228461	C6	Stroma	11348	0.593266
P2#alignments.possorted.tagged_BC03570_N04	P2	21.452	1625	5875	388	0.307334	3.8346	1445	1977	9558	6136	0.0333333	0.0202971	C3	Sertoli cells	10571	0.552992
P2#alignments.possorted.tagged_BC01826_N02	P2	16.681	1491	5850	426	0.306058	4.11617	2475	1868	9557	5214	2.53333	0.0222873	C6	Stroma	10734	0.561578
P2#alignments.possorted.tagged_BC03127_N03	P2	27.14	1864	7020	404	0.36727	2.95899	1847	2414	9557	5296	0.966667	0.0211363	C5	PTM	11985	0.627027
P2#alignments.possorted.tagged_BC01722_N02	P2	16.737	1496	5584	433	0.292203	3.54351	2644	2103	9555	4808	0.966667	0.0226583	C5	PTM	10954	0.573208
P2#alignments.possorted.tagged_BC00755_N01	P2	18.643	1431	5382	404	0.281869	3.39549	2186	2172	9547	5189	0.0666667	0.0211585	C5	PTM	10795	0.565361
P2#alignments.possorted.tagged_BC00742_N01	P2	15.219	1368	5494	367	0.287825	3.56869	2510	2089	9544	4945	0.1	0.0192267	C5	PTM	10599	0.55527
P2#alignments.possorted.tagged_BC00761_N01	P2	18.223	1362	4940	369	0.258828	3.82945	2271	1976	9543	5296	0.5	0.0193335	C5	PTM	10721	0.561721
P2#alignments.possorted.tagged_BC02909_N03	P2	26.987	2017	7071	413	0.37052	2.92352	1521	2432	9542	5589	1.3	0.0216412	C5	PTM	12226	0.640641
P2#alignments.possorted.tagged_BC03616_N03	P2	24.801	1791	6817	430	0.35721	3.52657	1875	2108	9542	5559	3.8	0.022532	C6	Stroma	11276	0.590861
P2#alignments.possorted.tagged_BC03350_N04	P2	26.278	2110	7106	416	0.372588	3.23822	1352	2250	9536	5934	2.36667	0.0218121	C5	PTM	12163	0.637741
P2#alignments.possorted.tagged_BC00788_N01	P2	16.909	1648	6346	377	0.332879	3.14255	1481	2301	9532	5750	1.36667	0.0197755	C6	Stroma	11909	0.624685
P2#alignments.possorted.tagged_BC01480_N02	P2	18.505	1355	5067	397	0.265901	3.65917	2464	2045	9528	5019	0.2	0.0208333	C5	PTM	10224	0.536524
P2#alignments.possorted.tagged_BC02301_N02	P2	15.162	1271	5098	388	0.267555	3.79467	2331	1987	9527	5209	0.3	0.0203632	C6	Stroma	10222	0.536475
P2#alignments.possorted.tagged_BC00815_N01	P2	20.535	1680	6442	414	0.338127	3.4702	2257	2131	9526	5138	0.4	0.02173	C5	PTM	11110	0.583141
P2#alignments.possorted.tagged_BC00804_N01	P2	21.422	1666	5966	380	0.313242	3.26849	2016	2231	9523	5276	0.466667	0.0199517	C5	PTM	10262	0.538801
P2#alignments.possorted.tagged_BC00829_N01	P2	18.006	1464	5399	370	0.283531	4.81613	2723	1637	9521	5161	0.0666667	0.0194307	C6	Stroma	10236	0.537549
P2#alignments.possorted.tagged_BC01634_N02	P2	16.74	1454	5367	357	0.281939	4.70624	2438	1668	9518	5412	3.5	0.0187539	C8	Innate lymph	10499	0.551534
P2#alignments.possorted.tagged_BC00808_N01	P2	28.147	1990	6815	463	0.358345	3.60039	1616	2067	9509	5826	0.166667	0.0243454	C3	Sertoli cells	11109	0.584131
P2#alignments.possorted.tagged_BC01859_N02	P2	21.535	1479	4941	580	0.259806	1.86329	126	3321	9509	6062	0.5	0.0304974	C2	Germ cells	10061	0.529025
P2#alignments.possorted.tagged_BC02300_N03	P2	19.233	1554	5648	435	0.296982	3.89146	2188	1944	9509	5377	0.8	0.0228731	C6	Leydig cells	10061	0.529025
P2#alignments.possorted.tagged_BC00811_N01	P2	18.404	1645	5965	386	0.313683	3.77309	2374	1992	9508	5142	0.966667	0.0202987	C5	PTM	10974	0.577093
P2#alignments.possorted.tagged_BC00774_N01	P2	21.587	1548	5963	359	0.313644	3.55486	2024	2087	9506	5395	0.3	0.0188828	C6	Stroma	11010	0.579108
P2#alignments.possorted.tagged_BC00735_N01	P2	18.614	1504	5571	396	0.293149	3.95929	2281	1916	9502	5305	1.03333	0.0208377	C5	PTM	10393	0.546885
P2#alignments.possorted.tagged_BC01251_N02	P2	15.806	1349	5183	351	0.272789	4.3916	2323	1762	9500	5415	0.266667	0.0184737	C4	Leydig cells	10022	0.527474
P2#alignments.possorted.tagged_BC01735_N02	P2	16.554	1463	5582	390	0.293789	4.46605	2298	1738	9500	5464	1.26667	0.0205263	C6	Stroma	10033	0.528053
P2#alignments.possorted.tagged_BC03096_N03	P2	19.451	1552	5638	361	0.296768	3.46591	1829	2127	9499	5543	0.433333	0.019002	C5	PTM	11027	0.58043
P2#alignments.possorted.tagged_BC03825_N04	P2	25.5	2099	7373	451	0.388175	2.74931	1107	2533	9497	5857	5.1	0.0237443	C6	Stroma	12110	0.63757
P2#alignments.possorted.tagged_BC01127_N02	P2	18.288	1413	5431	340	0.285963	3.98478	2546	1905	9496	5045	1.9	0.0179023	C5	PTM	10850	0.571293
P2#alignments.possorted.tagged_BC01849_N02	P2	20.652	1700	6200	429	0.32666	3.5212	1959	2099	9490	5432	0.0333333	0.0226027	C3	Sertoli cells	11049	0.582139
P2#alignments.possorted.tagged_BC00749_N01	P2	23.501	1531	5547	457	0.29244	3.48416	2332	2115	9484	5037	1.73333	0.0240932	C6	Stroma	9550	0.50348
P2#alignments.possorted.tagged_BC01232_N02	P2	21.158	1560	5807	412	0.306244	4.00581	2021	1894	9481	5566	0.333333	0.0217277	C3	Sertoli cells	9911	0.522677
P2#alignments.possorted.tagged_BC02642_N03	P2	19.455	1680	6217	380	0.32797	3.45186	2194	2129	9478	5155	0.1	0.0200464	C3	Sertoli cells	10782	0.568791
P2#alignments.possorted.tagged_BC00983_N02	P2	17.274	1387	5247	347	0.277003	3.68166	2513	2023	9471	4935	0.1	0.0183191	C5	PTM	10982	0.57977
P2#alignments.possorted.tagged_BC02308_N02	P2	17	1365	5307	396	0.280615	3.8617	2273	1945	9456	5238	0.2	0.0209391	C5	PTM	10440	0.55203
P2#alignments.possorted.tagged_BC02372_N02	P2	25.594	1551	5706	392	0.301841	3.34575	2000	2175	9452	5277	1.03333	0.0207364	C5	PTM	10633	0.562474
P2#alignments.possorted.tagged_BC00912_N03	P2	15.522	1458	5565	405	0.294538	4.0384	2397	1875	9447	5175	1.2	0.0214354	C6	Stroma	10096	0.53435
P2#alignments.possorted.tagged_BC01806_N02	P2	20.023	1628	6067	457	0.321141	4.22167	2364	1809	9446	5273	0.333333	0.0241901	C3	Sertoli cells	10626	0.56246
P2#alignments.possorted.tagged_BC01704_N02	P2	16.052	1451	5573	371	0.295118	4.14831	2451	1834	9442	5157	4.13333	0.0196463	C5	PTM	10251	0.54284
P2#alignments.possorted.tagged_BC01548_N02	P2	20.274	1546	5612	408	0.297277	3.5999	2266	2052	9439	5121	3.43333	0.0216125	C6	Stroma	10747	0.569287
P2#alignments.possorted.tagged_BC01809_N02	P2	24.798	1916	7081	360	0.375172	2.84243	2074	2456	9437	4907	4.8	0.0190739	C6	Stroma	11900	0.630497
P2#alignments.possorted.tagged_BC00743_N01	P2	24.427	1838	6759	400	0.358226	2.45821	1530	2728	9434	5176	1.8	0.0211999	C6	Stroma	11473	0.608067
P2#alignments.possorted.tagged_BC00786_N01	P2	25.471	1968	7097	405	0.376379	2.62895	1751	2598	9428	5079	3.66667	0.0214786	C6	Stroma	11398	0.604476
P2#alignments.possorted.tagged_BC00823_N01	P2	19.138	1614	6372	359	0.338145	3.82932	2334	1951	9422	5137	0.6	0.0190512	C6	Stroma	10819	0.574135
P2#alignments.possorted.tagged_BC02695_N03	P2	17.952	1514	5479	459	0.290756	3.93816	1834	1908	9422	5680	0.0333333	0.0243579	C3	Sertoli cells	10229	0.542825
P2#alignments.possorted.tagged_BC03848_N03	P2	24.197	2004	7160	391	0.380002	2.20224	1752	2942	9421	4727	1.56667	0.0207515	C3	Sertoli cells	12167	0.645738
P2#alignments.possorted.tagged_BC00801_N01	P2	17.43	1514	5850	421	0.310575	4.17757	2399	1819	9418	5200	1.23333	0.0223508	C6	Stroma	10487	0.556753
P2#alignments.possorted.tagged_BC02741_N03	P2	26.761	1892	6761	401	0.359055	2.89371	1639	2418	9415	5358	0.9	0.0212958	C5	PTM	11979	0.636166
P2#alignments.possorted.tagged_BC03206_N03	P2	17.353	1481	5862	398	0.311312	3.76709	1737	1975	9415	5703	2.93333	0.0211365	C6	Stroma	10635	0.56479
P2#alignments.possorted.tagged_BC03497_N03	P2	19.278	1509	5648	354	0.300011	3.18914	1974	2247	9413	5192	0.2	0.0188038	C3	Sertoli cells	11090	0.589079
P2#alignments.possorted.tagged_BC03288_N03	P2	16.663	1481	5660	545	0.300872	2.61352	1746	2603	9406	5057	0.7	0.0289709	C3	Sertoli cells	8951	0.475813
P2#alignments.possorted.tagged_BC00868_N01	P2	21.464	1485	5578	415	0.296576	4.24484	2614	1793	9404	4997	0.0333333	0.0220651	C3	Sertoli cells	10427	0.554392
P2#alignments.possorted.tagged_BC00795_N01	P2	19.93	1560	5793	398	0.308073	3.6963	2072	2002	9402	5328	1.63333	0.0211657	C6	Stroma	10681	0.568017
P2#alignments.possorted.tagged_BC02112_N02	P2	24.656	1793	6540	447	0.347798	2.78198	1672	2486	9402	5244	0.0666667	0.0237715	C3	Sertoli cells	11193	0.595246
P2#alignments.possorted.tagged_BC02954_N03	P2	18.165	1431	5579	412	0.296724	3.15606	2025	2262	9401	5114	0.966667	0.0219126	C5	PTM	10568	0.562068
P2#alignments.possorted.tagged_BC04004_N03	P2	26.876	1968	6851	473	0.364686	3.21589	1594	2228	9393	5571	0.0333333	0.0251783	C3	Sertoli cells	11223	0.597413
P2#alignments.possorted.tagged_BC03423_N03	P2	26.972	2084	7299	424	0.388575	2.65732	1523	2568	9392	5301	3.13333	0.0225724	C7	Vascular mural cells	11917	0.634423
P2#alignments.possorted.tagged_BC02595_N02	P2	20.779	1637	6183	421	0.329198	3.5236	1987	2076	9391	5328	2.4	0.0224151	C5	Stroma	11059	0.588808
P2#alignments.possorted.tagged_BC02415_N02	P2	18.904	1747	6372	399	0.339623	3.52314	2222	2074	9381	5085	0.0666667	0.0212664	C3	Sertoli cells	11011	0.586878
P2#alignments.possorted.tagged_BC02034_N03	P2	17.835	1360	4948	318	0.263809	4.04465	1827	1859	9378	5692	0.233333	0.0169546	C6	Stroma	10369	0.552836
P2#alignments.possorted.tagged_BC00826_N01	P2	18.049	1349	5484	391	0.292449	2.91809	1773	2393	9376	5210	0.7	0.0208511	C5	PTM	9880	0.526877
P2#alignments.possorted.tagged_BC00822_N01	P2	17.638	1443	5761	369	0.307253	3.43682	2529	2113	9375	4733	3.4	0.01968	C6	Stroma	10288	0.548693
P2#alignments.possorted.tagged_BC01933_N02	P2	20.514	1989	7498	397	0.399893	2.62529	1642	2586	9375	5147	2.13333	0.0211733	C6	Stroma	11917	0.635573
P2#alignments.possorted.tagged_BC02477_N02	P2	22.494	1579	5643	435	0.301024	3.40254	1904	2129	9373	5340	2.23333	0.023205	C6	Stroma	9938	0.53014
P2#alignments.possorted.tagged_BC00805_N01	P2	15.759	1329	4964	369	0.265058	3.79467	1658	1953	9364	5753	0.4	0.0197031	C6	Stroma	9826	0.524669
P2#alignments.possorted.tagged_BC00835_N01	P2	16.569	1481	5623	348	0.300342	3.49832	2228	2081	9361	5052	0.333333	0.0185878	C5	PTM	10607	0.566553
P2#alignments.possorted.tagged_BC00828_N01	P2	18.256	1429	5389	371	0.287905	3.95447	1842	1889	9359	5628	0.533333	0.0198205	C6	Stroma	9829	0.52511
P2#alignments.possorted.tagged_BC02956_N03	P2	20.378	1451	5447	397	0.291034	3.78425	2246	1956	9358	5156	1.13333	0.0212118	C5	PTM	9937	0.530936
P2#alignments.possorted.tagged_BC04276_N04	P2	28.72	1900	6448	373	0.344518	3.24207	1252	2206	9358	5900	0.2	0.0199295	C3	Sertoli cells	11117	0.593984
P2#alignments.possorted.tagged_BC00806_N01	P2	19.777	1578	5564	384	0.297318	3.79109	2039	1953	9357	5365	4.16667	0.0205194	C6	Stroma	10377	0.554505
P2#alignments.possorted.tagged_BC00726_N01	P2	27.541	1975	7142	446	0.381843	2.65455	2035	2559	9352	4758	3.73333	0.0238452	C8	Stroma	10984	0.587254
P2#alignments.possorted.tagged_BC00790_N01	P2	23.675	1889	6938	403	0.370976	3.00643	2026	2334	9351	4991	4.33333	0.0215485	C5	PTM	11379	0.608438
P2#alignments.possorted.tagged_BC00787_N01	P2	18.134	1392	5191	365	0.277712	3.98719	2670	1874	9346	4802	0.3	0.0195271	C5	PTM	10532	0.56345
P2#alignments.possorted.tagged_BC00824_N01	P2	23.14	1636	6058	404	0.324096	3.58137	2339	2040	9346	4967	0.3	0.0216135	C5	PTM	10906	0.583458
P2#alignments.possorted.tagged_BC01692_N02	P2	17.237	1532	5691	467	0.304657	3.36245	2360	2141	9340	4839	1.16667	0.025	C5	PTM	10918	0.584475
P2#alignments.possorted.tagged_BC00834_N01	P2	17.436	1356	5448	353	0.291711	4.10552	2457	1829	9338	5052	0.366667	0.0189013	C5	PTM	10158	0.543907
P2#alignments.possorted.tagged_BC01880_N02	P2	24.613	1765	6172	392	0.33069	3.47793	1622	2084	9332	5626	1.76667	0.021003	C5	Stroma	11324	0.60673
P2#alignments.possorted.tagged_BC00767_N01	P2	17.078	1354	5229	440	0.280225	3.51597	1968	2066	9330	5296	0.3	0.0235798	C6	Stroma	9894	0.530225
P2#alignments.possorted.tagged_BC00838_N01	P2	19.667	1599	6021	437	0.322703	3.07736	1604	2288	9329	5437	4.13333	0.0234216	C6	Stroma	10545	0.565173
P2#alignments.possorted.tagged_BC01507_N02	P2	18.099	1307	4963	401	0.266113	3.92604	2235	1893	9325	5197	1.5	0.0215013	C6	Stroma	9370	0.502413
P2#alignments.possorted.tagged_BC00803_N01	P2	16.788	1348	5197	344	0.278719	4.00161	2254	1864	9323	5205	0.866667	0.018449	C5	PTM	9980	0.535235
P2#alignments.possorted.tagged_BC02726_N03	P2	17.62	1397	5346	361	0.28671	3.3202	1781	2158	9323	5384	0.3	0.0193607	C6	Stroma	11146	0.597769
P2#alignments.possorted.tagged_BC01696_N02	P2	17.559	1472	5656	394	0.303531	3.36598	1723	2134	9317	5460	1.26667	0.0211441	C6	Stroma	10138	0.544059
P2#alignments.possorted.tagged_BC02364_N02	P2	12.871	1170	4806	363	0.257999	3.66633	2235	1996	9314	5083	0.133333	0.0194868	C6	Stroma	10533	0.565439
P2#alignments.possorted.tagged_BC02392_N02	P2	17.644	1586	5901	422	0.316951	3.52113	2133	2059	9309	5117	0.7	0.0226662	C6	Stroma	10641	0.571544
P2#alignments.possorted.tagged_BC00852_N01	P2	22.914	1620	5965	296	0.32063	3.53756	2134	2050	9302	5118	1.43333	0.0159106	C5	PTM	11034	0.593098
P2#alignments.possorted.tagged_BC03535_N03	P2	23.682	1770	6424	401	0.345488	3.03691	1307	2303	9297	5687	2.76667	0.0215661	C5	PTM	11002	0.591696
P2#alignments.possorted.tagged_BC03542_N03	P2	19.533	1381	5223	353	0.280897	3.60475	2470	2019	9297	4808	0.5	0.0189846	C5	PTM	10280	0.552867
P2#alignments.possorted.tagged_BC00807_N01	P2	18.259	1503	5462	374	0.293814	3.50557	1989	2063	9295	5243	0.566667	0.0201183	C5	PTM	10251	0.551425
P2#alignments.possorted.tagged_BC04444_N05	P2	24.669	2068	7228	428	0.388811	2.60551	520	2578	9295	6197	4.33333	0.0230231	C6	Stroma	12058	0.648628
P2#alignments.possorted.tagged_BC02056_N02	P2	16.712	1325	5174	359	0.278561	4.34965	2719	1736	9287	4832	1.13333	0.0193281	C5	PTM	9741	0.524443
P2#alignments.possorted.tagged_BC00832_N01	P2	15.692	1157	4596	357	0.247469	3.32712	2222	2146	9286	4918	0	0.0192225	C5	PTM	9870	0.531445
P2#alignments.possorted.tagged_BC03658_N04	P2	16.724	1630	5848	360	0.314883	3.92887	2200	1884	9286	5202	0.7	0.019384	C5	PTM	11244	0.605428
P2#alignments.possorted.tagged_BC01763_N02	P2	15.623	1428	5481	362	0.295153	3.20326	2222	2209	9285	4854	1.46667	0.0194938	C5	PTM	10360	0.557889
P2#alignments.possorted.tagged_BC00843_N01	P2	15.601	1166	4532	365	0.244181	3.12444	1791	2250	9280	5239	1.46667	0.0196659	C6	Stroma	8755	0.471713
P2#alignments.possorted.tagged_BC01896_N02	P2	23.345	1792	6691	398	0.360545	3.37689	2327	2120	9279	4832	1.16667	0.0214463	C6	Stroma	10951	0.590096
P2#alignments.possorted.tagged_BC00854_N01	P2	23.347	1686	6124	399	0.330099	3.78638	2419	1938	9276	4919	2.23333	0.0215071	C6	Stroma	10213	0.550507
P2#alignments.possorted.tagged_BC00872_N01	P2	13.296	1222	4855	382	0.261725	5.19159	2783	1498	9275	4994	0.166667	0.020593	C5	PTM	10086	0.54372
P2#alignments.possorted.tagged_BC03512_N03	P2	21.04	1615	6209	384	0.334753	3.83021	2030	1920	9274	5324	1.5	0.020703	C6	Stroma	11066	0.596614
P2#alignments.possorted.tagged_BC00830_N01	P2	17.416	1504	5794	347	0.312412	4.03147	2386	1843	9273	5044	0.733333	0.0187102	C6	Stroma	10059	0.542381
P2#alignments.possorted.tagged_BC02156_N02	P2	17.483	1598	6042	393	0.325855	3.03262	2136	2299	9271	4836	0.733333	0.0211951	C6	Stroma	10710	0.577608
P2#alignments.possorted.tagged_BC02142_N02	P2	20.424	1413	5436	409	0.293299	3.65445	2340	1991	9267	4936	1.06667	0.0220676	C5	PTM	10723	0.578558
P2#alignments.possorted.tagged_BC02996_N03	P2	19.03	1480	5878	396	0.317147	3.21611	1960	2198	9267	5109	0.966667	0.0213661	C6	Stroma	10378	0.559944
P2#alignments.possorted.tagged_BC02610_N03	P2	26.559	2146	7575	398	0.409017	3.24187	1948	2183	9260	5129	2.73333	0.0214903	C6	Stroma	12057	0.651026
P2#alignments.possorted.tagged_BC02656_N03	P2	17.196	1320	5147	365	0.277946	3.26289	1499	2172	9259	5588	0.166667	0.0197106	C5	PTM	10231	0.552489
P2#alignments.possorted.tagged_BC01727_N02	P2	17.531	1567	5734	470	0.309745	2.65128	1930	2535	9256	4791	0.0666667	0.0253889	C8	Macrophages	9454	0.510696
P2#alignments.possorted.tagged_BC01746_N03	P2	22.38	1684	6174	409	0.333513	4.06069	2195	1829	9256	5232	0.0333333	0.0220938	C3	Sertoli cells	10720	0.579084
P2#alignments.possorted.tagged_BC02390_N02	P2	20.689	1400	5056	345	0.273179	3.94866	2142	1870	9254	5242	0.133333	0.0186406	C5	PTM	10507	0.5677
P2#alignments.possorted.tagged_BC03768_N03	P2	18.76	1639	5951	345	0.321641	3.60249	2002	2010	9251	5239	0.666667	0.0186466	C5	PTM	10985	0.59372
P2#alignments.possorted.tagged_BC02693_N02	P2	19.357	1828	6759	441	0.36543	2.9623	1913	2334	9248	5001	5.13333	0.023843	C6	Stroma	10989	0.594128
P2#alignments.possorted.tagged_BC02205_N02	P2	18.361	1465	5778	391	0.312493	3.56543	2297	2025	9245	4923	0.9	0.0211466	C5	PTM	10990	0.594375
P2#alignments.possorted.tagged_BC00833_N01	P2	18.647	1469	5637	366	0.305099	3.98543	2201	1853	9238	5184	0.466667	0.0198095	C6	Stroma	10053	0.544111
P2#alignments.possorted.tagged_BC00845_N01	P2	19.225	1534	5826	352	0.315396	3.78054	2401	1932	9236	4903	0.633333	0.0190559	C5	PTM	10713	0.579959
P2#alignments.possorted.tagged_BC00740_N01	P2	24.992	2032	7669	446	0.415394	2.11964	1833	2959	9231	4439	1.9	0.0241577	C7	Stroma	11889	0.643971
P2#alignments.possorted.tagged_BC02275_N02	P2	24.675	2380	7702	443	0.417272	2.00815	191	3068	9229	5970	1.86667	0.0240004	C5	PTM	12690	0.687507
P2#alignments.possorted.tagged_BC00856_N01	P2	18.152	1265	4748	328	0.257512	3.42795	1956	2082	9219	5181	0.1	0.0177893	C5	PTM	9650	0.523376
P2#alignments.possorted.tagged_BC02251_N02	P2	22.455	1735	6502	407	0.352756	3.02973	1931	2287	9216	4998	3.33333	0.0220812	C5	PTM	11126	0.603624
P2#alignments.possorted.tagged_BC02357_N02	P2	20.724	1685	6062	402	0.328885	2.9707	1740	2321	9216	5155	5.36667	0.0218099	C8	Innate lymph	10494	0.569336
P2#alignments.possorted.tagged_BC03948_N03	P2	20.119	1585	5911	389	0.320762	3.65354	1772	1980	9214	5462	2.9	0.0211092	C6	Stroma	10458	0.567506
P2#alignments.possorted.tagged_BC01879_N02	P2	9.874	364	1578	544	0.085705	1.43416	350	3782	9206	5074	0	0.0295459	C6	Stroma	2903	0.157669
P2#alignments.possorted.tagged_BC01847_N02	P2	24.557	1761	6344	392	0.344595	3.09657	1671	2247	9205	5287	5.46667	0.0212928	C5	Stroma	10938	0.594134
P2#alignments.possorted.tagged_BC02944_N03	P2	17.764	1543	5659	395	0.307421	3.5997	1911	2001	9204	5292	1.1	0.0214581	C5	PTM	10464	0.568449
P2#alignments.possorted.tagged_BC00865_N01	P2	18.121	1391	5197	381	0.282384	4.16386	2616	1782	9202	4804	0.133333	0.020702	C6	Stroma	9933	0.53972
P2#alignments.possorted.tagged_BC01956_N02	P2	20.965	1821	6673	360	0.362624	3.18989	2168	2196	9201	4837	3.1	0.0195631	C5	PTM	11467	0.623139
P2#alignments.possorted.tagged_BC00814_N01	P2	17.961	1424	5153	363	0.280115	2.78986	1639	2427	9198	5132	0.2	0.0197326	C4	Leydig cells	10007	0.543977
P2#alignments.possorted.tagged_BC02686_N02	P2	18.511	1692	6473	429	0.352061	3.5942	2153	2001	9193	5039	0.8	0.023333	C5	PTM	10998	0.598173
P2#alignments.possorted.tagged_BC04243_N05	P2	24.694	1696	6196	409	0.337069	2.66321	748	2509	9191	5934	2.6	0.02225	C5	PTM	10947	0.595528
P2#alignments.possorted.tagged_BC00855_N01	P2	16.897	1553	5637	387	0.306692	3.26648	1895	2154	9190	5141	0.266667	0.0210555	C6	PTM	9679	0.526605
P2#alignments.possorted.tagged_BC03521_N03	P2	25.619	2070	7132	452	0.388199	3.17925	1465	2198	9186	5523	4.56667	0.0246027	C8	Stroma	11558	0.62911
P2#alignments.possorted.tagged_BC03963_N04	P2	21.958	1996	6962	437	0.378987	2.79232	1224	2422	9185	5539	2.53333	0.0237888	C3	Sertoli cells	11448	0.62319
P2#alignments.possorted.tagged_BC02552_N02	P2	18.138	1548	6228	435	0.339216	3.32611	2003	2122	9180	5055	0.0666667	0.0236928	C3	Sertoli cells	10825	0.589597
P2#alignments.possorted.tagged_BC00890_N01	P2	19.365	1506	5675	373	0.30913	4.41215	2255	1696	9179	5228	0.0333333	0.0203181	C3	Sertoli cells	10098	0.55006
P2#alignments.possorted.tagged_BC01891_N02	P2	20.318	1457	5562	361	0.30304	4.21124	2548	1761	9177	4868	0.3	0.0196687	C5	PTM	10544	0.57448
P2#alignments.possorted.tagged_BC02176_N02	P2	19.07	1772	6512	367	0.3548	3.48096	1955	2048	9177	5174	0.8	0.0199956	C6	Stroma	11399	0.621064
P2#alignments.possorted.tagged_BC02668_N03	P2	17.787	1518	5856	413	0.319128	3.59209	1970	1998	9175	5207	0.8	0.0225068	C6	Stroma	10459	0.569973
P2#alignments.possorted.tagged_BC03425_N03	P2	22.833	1499	5621	350	0.306322	3.64322	2142	1976	9175	5057	1.26667	0.0190736	C5	PTM	10374	0.565341
P2#alignments.possorted.tagged_BC02239_N02	P2	20.598	1862	6884	468	0.375273	2.93142	1623	2333	9172	5216	1.23333	0.0255124	C6	Stroma	10978	0.598452
P2#alignments.possorted.tagged_BC03031_N03	P2	17.49	1422	5315	404	0.289741	3.4352	1471	2068	9172	5633	0.166667	0.0220235	C6	Stroma	9611	0.523932
P2#alignments.possorted.tagged_BC03669_N03	P2	22.265	1383	4965	417	0.270808	2.89257	1225	2355	9167	5587	0.633333	0.0227446	C8	Innate lymph	9606	0.523945
P2#alignments.possorted.tagged_BC00896_N01	P2	18.167	1422	5618	391	0.306492	4.12871	2569	1787	9165	4809	0.7	0.0213312	C6	Stroma	10134	0.552864
P2#alignments.possorted.tagged_BC02383_N02	P2	19.303	1355	5109	354	0.278815	3.72025	2059	1941	9162	5162	0.333333	0.0193189	C5	PTM	10373	0.566088
P2#alignments.possorted.tagged_BC02443_N03	P2	18.93	1520	6003	385	0.327675	3.94868	1963	1851	9160	5346	3.5	0.0210153	C6	Stroma	10113	0.55202
P2#alignments.possorted.tagged_BC04540_N05	P2	29.827	2169	7325	479	0.399967	2.52599	424	2597	9157	6136	0.266667	0.0261549	C3	Sertoli cells	11825	0.645681
P2#alignments.possorted.tagged_BC01531_N02	P2	19.125	1497	5413	378	0.295599	3.8754	2139	1878	9156	5139	0.3	0.0206422	C5	PTM	10654	0.581804
P2#alignments.possorted.tagged_BC02246_N02	P2	16.449	1462	5776	462	0.315766	3.67826	2254	1955	9146	4937	3.06667	0.0252569	C6	Stroma	9732	0.532036
P2#alignments.possorted.tagged_BC00898_N01	P2	15.326	1277	4968	356	0.271624	4.74074	2749	1593	9145	4803	0.466667	0.0194642	C6	Stroma	9202	0.503116
P2#alignments.possorted.tagged_BC02601_N03	P2	19.872	1415	5352	357	0.292683	3.58296	2096	1995	9143	5052	5.66667	0.0195231	C4	Leydig cells	9862	0.53932
P2#alignments.possorted.tagged_BC02449_N02	P2	26.561	1784	6599	370	0.360956	2.83753	1315	2382	9141	5444	1.43333	0.0202385	C9	Endothelial cells	11028	0.603216
P2#alignments.possorted.tagged_BC00873_N01	P2	16.056	1273	4831	317	0.264307	3.84571	2093	1886	9139	5160	0	0.0173433	C5	PTM	9850	0.538899
P2#alignments.possorted.tagged_BC01576_N02	P2	18.49	1550	5666	337	0.310092	3.40077	2277	2076	9136	4783	0.766667	0.0184435	C5	PTM	10277	0.562445
P2#alignments.possorted.tagged_BC04378_N04	P2	19.968	1684	6193	412	0.338934	2.73203	1646	2448	9136	5042	1.33333	0.0225482	C6	Stroma	10714	0.586362
P2#alignments.possorted.tagged_BC02450_N02	P2	21.685	1566	5748	362	0.314821	2.50846	1035	2602	9129	5492	4.9	0.0198269	C4	Leydig cells	10475	0.573721
P2#alignments.possorted.tagged_BC02907_N03	P2	18.407	1478	5333	366	0.292155	3.90172	2097	1862	9127	5168	0.6	0.0200504	C5	PTM	10832	0.593404
P2#alignments.possorted.tagged_BC02359_N02	P2	19.448	1591	5739	375	0.314776	2.89739	1389	2339	9116	5388	2	0.0205682	C6	Stroma	10420	0.571523
P2#alignments.possorted.tagged_BC00879_N01	P2	21.24	1566	5819	401	0.319199	3.23559	1828	2152	9115	5135	0.766667	0.0219967	C5	PTM	10001	0.548601
P2#alignments.possorted.tagged_BC03384_N03	P2	23.464	1493	5441	378	0.298595	3.43142	2069	2056	9111	4986	0.733333	0.0207442	C5	PTM	10416	0.571617
P2#alignments.possorted.tagged_BC00894_N01	P2	20.47	1623	5937	382	0.326101	4.15751	2599	1765	9103	4739	1.6	0.0209821	C5	Stroma	10459	0.574481
P2#alignments.possorted.tagged_BC00827_N01	P2	21.086	1576	5764	359	0.316634	2.54163	1681	2570	9102	4851	0.533333	0.0197209	C5	PTM	11019	0.605307
P2#alignments.possorted.tagged_BC02374_N02	P2	18.537	1348	5218	394	0.287208	4.65277	2484	1607	9084	4993	0.333333	0.0216865	C6	Stroma	9535	0.524824
P2#alignments.possorted.tagged_BC02023_N02	P2	19.416	1510	5802	388	0.319388	3.68921	2235	1937	9083	4911	1.26667	0.0213586	C6	Stroma	10393	0.572113
P2#alignments.possorted.tagged_BC01713_N02	P2	19.868	1515	5658	414	0.311598	3.60396	2271	1972	9079	4836	3.9	0.0227999	C5	PTM	10559	0.581507
P2#alignments.possorted.tagged_BC02416_N02	P2	16.489	1324	4961	353	0.273213	3.70902	1810	1928	9079	5341	0.133333	0.0194405	C5	PTM	9912	0.545875
P2#alignments.possorted.tagged_BC00862_N01	P2	22.263	1574	5816	356	0.320441	3.93207	2045	1840	9075	5190	0.0666667	0.0196143	C3	Sertoli cells	10509	0.579008
P2#alignments.possorted.tagged_BC02070_N02	P2	19.21	1785	6759	428	0.372438	3.07088	1570	2229	9074	5275	1.33333	0.0235839	C6	Stroma	10816	0.595989
P2#alignments.possorted.tagged_BC02035_N02	P2	18.233	1418	5295	360	0.291864	3.57438	2153	1983	9071	4935	0.1	0.0198435	C3	Sertoli cells	10202	0.562342
P2#alignments.possorted.tagged_BC02421_N02	P2	19.925	1620	6049	400	0.333536	3.5798	1705	1980	9068	5383	1.8	0.0220556	C7	Stroma	10951	0.603827
P2#alignments.possorted.tagged_BC02558_N02	P2	18.962	1513	5728	402	0.315836	3.37434	1966	2073	9068	5029	0.966667	0.0221659	C5	PTM	10201	0.562472
P2#alignments.possorted.tagged_BC01986_N02	P2	19.16	1432	5269	313	0.290591	3.42892	1916	2047	9066	5103	0.866667	0.0172623	C5	PTM	10337	0.570097
P2#alignments.possorted.tagged_BC02290_N02	P2	19.243	1273	4850	453	0.267483	3.40311	2098	2059	9066	4909	0.2	0.0249835	C5	PTM	9742	0.537282
P2#alignments.possorted.tagged_BC00863_N01	P2	14.29	1299	4910	390	0.270822	3.44145	2041	2041	9065	4983	0.133333	0.0215113	C5	PTM	10104	0.557308
P2#alignments.possorted.tagged_BC02670_N02	P2	19.497	1280	4994	376	0.275485	4.1267	2458	1768	9064	4838	1.26667	0.0207414	C6	Stroma	9022	0.497683
P2#alignments.possorted.tagged_BC00892_N01	P2	15.707	1285	4707	343	0.259883	3.89249	2674	1851	9056	4531	0	0.0189377	C3	Sertoli cells	9082	0.501436
P2#alignments.possorted.tagged_BC03000_N03	P2	21.365	1640	5746	395	0.317248	3.01418	1390	2256	9056	5410	0.766667	0.0218087	C5	PTM	10871	0.60021
P2#alignments.possorted.tagged_BC00900_N01	P2	19.744	1366	5260	349	0.290447	4.27373	2424	1717	9055	4914	4.7	0.0192711	C6	Stroma	9674	0.53418
P2#alignments.possorted.tagged_BC02352_N02	P2	21.188	1391	5311	344	0.293361	3.7617	2345	1901	9052	4806	0.0333333	0.0190013	C3	Sertoli cells	9525	0.526127
P2#alignments.possorted.tagged_BC04927_N06	P2	7.787	464	1940	389	0.10717	0.331813	82	6796	9051	2173	0	0.0214893	C8	Innate lymph	4404	0.243288
P2#alignments.possorted.tagged_BC02704_N03	P2	21.122	1568	5649	434	0.312203	4.44017	1930	1663	9047	5454	0.166667	0.0239859	C6	Stroma	10072	0.556649
P2#alignments.possorted.tagged_BC02441_N02	P2	25.45	1568	5824	387	0.321981	3.05016	1714	2233	9044	5097	2.3	0.0213954	C4	Leydig cells	10301	0.569494
P2#alignments.possorted.tagged_BC01176_N02	P2	22.629	1497	5355	365	0.296118	3.14201	1765	2183	9042	5094	0.6	0.0201836	C5	PTM	10218	0.56503
P2#alignments.possorted.tagged_BC02960_N03	P2	18.205	1471	5407	338	0.29906	3.36293	1643	2072	9040	5325	0.8	0.0186947	C5	PTM	10491	0.580254
P2#alignments.possorted.tagged_BC03306_N03	P2	21.983	1532	5589	378	0.30916	4.29215	1846	1708	9039	5485	0.0666667	0.0209094	C3	Sertoli cells	10290	0.5692
P2#alignments.possorted.tagged_BC01382_N02	P2	19.855	1494	5326	384	0.294743	3.7779	1835	1891	9035	5309	1.7	0.0212507	C5	PTM	9929	0.549474
P2#alignments.possorted.tagged_BC02567_N02	P2	19.99	1595	6000	377	0.332079	3.87271	2200	1854	9034	4980	1.8	0.0208656	C6	Stroma	10272	0.568519
P2#alignments.possorted.tagged_BC03750_N03	P2	21.56	1361	5021	322	0.278018	3.84962	1818	1862	9030	5350	0.166667	0.0178295	C6	Stroma	9437	0.522536
P2#alignments.possorted.tagged_BC02505_N02	P2	23.174	1615	5824	386	0.322588	3.44242	2144	2032	9027	4851	0.3	0.0213803	C3	Sertoli cells	10018	0.554891
P2#alignments.possorted.tagged_BC02169_N02	P2	16.033	1425	5324	396	0.294991	4.41332	2503	1667	9024	4854	0.133333	0.0219415	C6	Stroma	9687	0.536735
P2#alignments.possorted.tagged_BC00866_N01	P2	23.745	1367	5301	358	0.293749	3.88522	2164	1847	9023	5012	0.833333	0.0198382	C5	PTM	10107	0.560069
P2#alignments.possorted.tagged_BC03665_N03	P2	23.238	1596	5861	399	0.324853	3.21936	1778	2138	9021	5105	0.933333	0.0221151	C5	PTM	11202	0.620885
P2#alignments.possorted.tagged_BC03796_N04	P2	18.036	1430	5528	373	0.306464	4.10702	2257	1766	9019	4996	0.366667	0.0206786	C6	Stroma	9908	0.549285
P2#alignments.possorted.tagged_BC02786_N02	P2	19.382	1292	4948	390	0.274523	4.25788	2377	1714	9012	4921	0.0666667	0.0216378	C3	Sertoli cells	9397	0.52136
P2#alignments.possorted.tagged_BC02148_N03	P2	22.448	1383	5229	325	0.290435	4.27049	1831	1708	9002	5463	1.5	0.0180515	C5	PTM	10116	0.561875
P2#alignments.possorted.tagged_BC00909_N01	P2	23.95	1403	5036	383	0.279809	4.42108	2570	1660	8999	4769	0.3	0.0212801	C5	PTM	10057	0.558784
P2#alignments.possorted.tagged_BC01969_N02	P2	21.504	1390	5071	362	0.281754	3.71893	2181	1907	8999	4911	2.13333	0.0201133	C6	Stroma	9456	0.525392
P2#alignments.possorted.tagged_BC01261_N02	P2	19.84	1583	5721	365	0.318045	3.74367	2019	1896	8994	5079	0.0666667	0.0202913	C3	Sertoli cells	10246	0.569602
P2#alignments.possorted.tagged_BC02303_N02	P2	18.516	1253	4744	337	0.263731	4.29682	2332	1698	8994	4964	0.0333333	0.0187347	C5	PTM	10013	0.556649
P2#alignments.possorted.tagged_BC00916_N01	P2	20.108	1706	6450	444	0.358612	3.12712	1595	2179	8993	5219	0.433333	0.0246859	C6	Stroma	11276	0.626932
P2#alignments.possorted.tagged_BC02291_N02	P2	24.712	1510	5524	410	0.30723	4.70431	2512	1576	8990	4902	0.0333333	0.0228031	C3	Sertoli cells	10095	0.561457
P2#alignments.possorted.tagged_BC04131_N04	P2	20.036	1710	6000	309	0.333704	2.75679	818	2393	8990	5779	3.16667	0.0171858	C6	Stroma	10078	0.560512
P2#alignments.possorted.tagged_BC01850_N02	P2	20.412	1505	5739	366	0.319366	3.51508	2151	1990	8985	4844	3.36667	0.0203673	C6	Stroma	10486	0.583528
P2#alignments.possorted.tagged_BC01410_N02	P2	19.816	1441	5380	374	0.299621	3.31635	1876	2080	8978	5022	0.0666667	0.0208287	C3	Sertoli cells	9637	0.536701
P2#alignments.possorted.tagged_BC02700_N03	P2	24.388	1872	6452	430	0.359363	2.71872	1681	2414	8977	4882	1.73333	0.0239501	C5	PTM	10885	0.606272
P2#alignments.possorted.tagged_BC03675_N03	P2	23.762	1728	6246	432	0.348122	3.14174	1578	2166	8971	5227	1.3	0.0240776	C6	Stroma	10298	0.573961
P2#alignments.possorted.tagged_BC03145_N03	P2	17.737	1469	5380	366	0.299889	4.69524	2449	1575	8970	4946	0.7	0.0204013	C6	Stroma	10694	0.596098
P2#alignments.possorted.tagged_BC01366_N02	P2	20.443	1466	5486	339	0.306104	3.48274	2156	1999	8961	4806	1.2	0.0189153	C5	PTM	10486	0.585091
P2#alignments.possorted.tagged_BC01649_N02	P2	20.435	1517	5255	373	0.293215	3.74629	2012	1888	8961	5061	0.1	0.0208124	C3	Sertoli cells	9505	0.530354
P2#alignments.possorted.tagged_BC03300_N03	P2	19.021	1412	5179	359	0.289103	4.00112	1799	1791	8957	5367	1.53333	0.0200402	C5	PTM	10044	0.560679
P2#alignments.possorted.tagged_BC02394_N03	P2	18.116	1537	5637	388	0.314776	4.00783	2303	1788	8954	4863	2.63333	0.0216663	C5	PTM	10296	0.574939
P2#alignments.possorted.tagged_BC02511_N02	P2	14.808	860	3178	455	0.177463	2.28949	836	2722	8954	5396	0.0333333	0.0254076	C6	Stroma	5875	0.328066
P2#alignments.possorted.tagged_BC03377_N03	P2	22.081	1550	5626	363	0.314337	3.43459	1928	2018	8949	5003	1.9	0.0202816	C5	PTM	10809	0.603922
P2#alignments.possorted.tagged_BC00905_N01	P2	17.316	1233	4843	404	0.270649	3.52097	2345	1979	8947	4623	0.1	0.0225774	C6	Stroma	8514	0.475802
P2#alignments.possorted.tagged_BC00932_N01	P2	25.488	1802	6664	451	0.372415	3.67206	2040	1915	8947	4992	2.3	0.025204	C5	PTM	11481	0.641612
P2#alignments.possorted.tagged_BC00926_N01	P2	19.048	1693	6149	367	0.343673	3.84091	2302	1848	8946	4796	4.9	0.020512	C5	PTM	10657	0.595629
P2#alignments.possorted.tagged_BC02867_N02	P2	18.345	1649	6085	397	0.340401	2.86759	2066	2311	8938	4561	4.83333	0.0222085	C5	PTM	10868	0.607966
P2#alignments.possorted.tagged_BC03209_N03	P2	19.492	1447	5226	410	0.292511	3.34273	1893	2057	8933	4983	0.233333	0.0229486	C5	PTM	10407	0.582503
P2#alignments.possorted.tagged_BC03801_N04	P2	23.34	1603	5489	366	0.307335	3.50328	1536	1983	8930	5411	2.26667	0.0204927	C6	Stroma	9790	0.548152
P2#alignments.possorted.tagged_BC00875_N01	P2	18.819	1416	5306	366	0.297188	3.36315	2380	2046	8927	4501	1.83333	0.0204996	C5	PTM	9803	0.549065
P2#alignments.possorted.tagged_BC02295_N02	P2	27.755	1710	6007	427	0.336489	3.88828	2067	1826	8926	5033	1.73333	0.0239189	C6	Stroma	10329	0.578591
P2#alignments.possorted.tagged_BC00976_N02	P2	20.248	1636	6508	413	0.364635	3.32994	1916	2061	8924	4947	0.933333	0.0231398	C7	Stroma	10394	0.582362
P2#alignments.possorted.tagged_BC03498_N03	P2	18.204	1526	5449	327	0.3053	3.94953	1512	1803	8924	5609	0.266667	0.0183214	C4	Leydig cells	9898	0.554572
P2#alignments.possorted.tagged_BC02378_N02	P2	22.397	1640	6105	361	0.342247	3.65987	2282	1914	8919	4723	3.86667	0.0202377	C5	Stroma	10812	0.606122
P2#alignments.possorted.tagged_BC03154_N03	P2	21.157	1624	5817	369	0.326102	3.42411	1914	2016	8919	4989	0.0666667	0.0206862	C3	Sertoli cells	10377	0.581736
P2#alignments.possorted.tagged_BC02742_N02	P2	24.819	1855	6821	341	0.3826	2.65328	1488	2440	8914	4986	5.2	0.0191272	C6	Stroma	10854	0.608818
P2#alignments.possorted.tagged_BC02157_N02	P2	22.73	1894	6814	400	0.382336	2.90491	1964	2282	8911	4665	2.36667	0.0224442	C6	Stroma	11069	0.621086
P2#alignments.possorted.tagged_BC02898_N03	P2	18.213	1582	5951	411	0.333951	3.61419	2008	1931	8910	4971	1.63333	0.023064	C6	Stroma	10184	0.571493
P2#alignments.possorted.tagged_BC02126_N02	P2	23.672	1841	6806	407	0.382059	3.33853	2148	2053	8907	4706	1.3	0.0228472	C6	Stroma	10632	0.596834
P2#alignments.possorted.tagged_BC02473_N02	P2	18.58	1323	5313	360	0.298282	4.45043	2151	1634	8906	5121	0.966667	0.0202111	C5	PTM	10054	0.564451
P2#alignments.possorted.tagged_BC01988_N02	P2	23.762	1692	6345	350	0.356301	3.19012	1849	2125	8904	4930	1.2	0.0196541	C6	Stroma	10896	0.61186
P2#alignments.possorted.tagged_BC00925_N01	P2	15.531	1200	4788	344	0.268928	3.66807	2359	1907	8902	4636	0.0333333	0.0193215	C6	Stroma	9474	0.532128
P2#alignments.possorted.tagged_BC00915_N01	P2	18.266	1356	5221	328	0.293315	3.53619	2384	1962	8900	4554	0.6	0.018427	C5	PTM	9984	0.560899
P2#alignments.possorted.tagged_BC03176_N04	P2	24.595	1714	6311	395	0.354551	2.70216	1354	2404	8900	5142	4.5	0.022191	C5	PTM	10764	0.604719
P2#alignments.possorted.tagged_BC01798_N03	P2	24.759	1838	6622	416	0.372064	3.51955	1472	1969	8899	5458	1	0.0233734	C6	Stroma	10806	0.607147
P2#alignments.possorted.tagged_BC00939_N01	P2	19.895	1497	5725	425	0.321738	4.69226	2517	1563	8897	4817	0.0333333	0.0238845	C3	Sertoli cells	10346	0.581432
P2#alignments.possorted.tagged_BC03378_N04	P2	28.327	2017	6751	426	0.37944	2.86447	1188	2302	8896	5406	2.53333	0.0239433	C5	PTM	11205	0.629777
P2#alignments.possorted.tagged_BC04070_N03	P2	19.913	1619	5962	380	0.335094	3.21412	1451	2111	8896	5334	4.7	0.0213579	C6	Stroma	10132	0.569469
P2#alignments.possorted.tagged_BC00883_N01	P2	17.268	1622	6434	384	0.361664	2.50197	1944	2540	8895	4411	1.73333	0.0215852	C6	Stroma	10501	0.590275
P2#alignments.possorted.tagged_BC02163_N02	P2	20.486	1438	5340	363	0.300371	4.14708	1981	1727	8889	5181	0.0666667	0.0204185	C3	Sertoli cells	9988	0.561818
P2#alignments.possorted.tagged_BC03717_N03	P2	19.175	1530	5525	427	0.310917	3.89802	1963	1814	8885	5108	1.03333	0.0240293	C5	PTM	10469	0.589139
P2#alignments.possorted.tagged_BC02934_N03	P2	22.426	1359	4970	360	0.279968	3.56584	2021	1944	8876	4911	0.766667	0.0202794	C5	PTM	9378	0.528279
P2#alignments.possorted.tagged_BC00893_N01	P2	20.662	1513	6033	374	0.339887	3.26068	2214	2083	8875	4578	0.8	0.0210704	C6	Stroma	10069	0.567268
P2#alignments.possorted.tagged_BC01414_N02	P2	17.769	1346	5066	360	0.285473	3.76787	2019	1861	8873	4993	0.833333	0.0202863	C5	Stroma	9140	0.515046
P2#alignments.possorted.tagged_BC02445_N02	P2	19.505	1379	5351	360	0.301533	3.71717	2166	1881	8873	4826	0.666667	0.0202863	C5	PTM	10102	0.569255
P2#alignments.possorted.tagged_BC02465_N02	P2	18.948	1464	5344	417	0.30124	4.12421	2165	1731	8870	4974	1.1	0.0235062	C1	Neutrophils	7846	0.442277
P2#alignments.possorted.tagged_BC02513_N02	P2	20.26	1371	5093	377	0.287124	4.24793	2085	1690	8869	5094	0.0333333	0.0212538	C3	Sertoli cells	9471	0.533938
P2#alignments.possorted.tagged_BC02600_N02	P2	21.414	1860	6705	399	0.378087	3.44016	1984	1997	8867	4886	2.63333	0.0224992	C5	PTM	10836	0.61103
P2#alignments.possorted.tagged_BC02233_N02	P2	20.659	1471	5523	378	0.311506	3.74826	2425	1867	8865	4573	1.03333	0.0213198	C5	PTM	10502	0.592329
P2#alignments.possorted.tagged_BC03400_N04	P2	20.857	1601	6319	377	0.356482	3.01768	1697	2206	8863	4960	0.666667	0.0212682	C5	PTM	10789	0.608654
P2#alignments.possorted.tagged_BC02538_N02	P2	18.283	1348	5100	349	0.28781	4.97841	2390	1482	8860	4988	0.733333	0.0196953	C6	Stroma	9868	0.556885
P2#alignments.possorted.tagged_BC00942_N01	P2	18.509	1617	6233	322	0.351789	3.21656	1772	2101	8859	4986	0.666667	0.0181736	C6	Stroma	10564	0.59623
P2#alignments.possorted.tagged_BC00913_N01	P2	21.827	1466	5416	391	0.305885	4.1441	2181	1721	8853	4951	0.166667	0.0220829	C6	Stroma	9562	0.540043
P2#alignments.possorted.tagged_BC03610_N03	P2	27.022	2197	7513	355	0.424319	2.51728	880	2517	8853	5456	1.6	0.0200497	C6	Stroma	11375	0.642438
P2#alignments.possorted.tagged_BC02170_N02	P2	24.745	1687	6132	369	0.346402	3.31967	1726	2049	8851	5076	3.23333	0.0208451	C6	Stroma	10264	0.579821
P2#alignments.possorted.tagged_BC02894_N03	P2	16.913	1452	5532	340	0.312542	2.89353	1424	2273	8850	5153	1.63333	0.019209	C5	PTM	10814	0.61096
P2#alignments.possorted.tagged_BC00923_N01	P2	22.633	1303	4929	356	0.278758	3.59511	1822	1924	8841	5095	0.4	0.0201335	C6	Stroma	9077	0.513347
P2#alignments.possorted.tagged_BC02154_N03	P2	18.709	1370	5090	379	0.288189	3.66016	2041	1895	8831	4895	0.166667	0.0214585	C5	PTM	10457	0.592062
P2#alignments.possorted.tagged_BC03741_N03	P2	25.248	1683	6009	300	0.340222	3.38046	1640	2016	8831	5175	2.03333	0.0169856	C5	PTM	10531	0.596252
P2#alignments.possorted.tagged_BC00956_N01	P2	17.595	1395	5406	354	0.306116	4.61705	2153	1572	8830	5105	0.5	0.0200453	C6	Stroma	9810	0.555493
P2#alignments.possorted.tagged_BC01439_N02	P2	23.051	1490	5604	437	0.317327	4.11291	2171	1727	8830	4932	2.8	0.0247452	C5	PTM	10303	0.583409
P2#alignments.possorted.tagged_BC00935_N01	P2	18.008	1355	5052	374	0.286167	4.06716	2320	1742	8827	4765	0.0333333	0.021185	C3	Sertoli cells	9432	0.53427
P2#alignments.possorted.tagged_BC02088_N02	P2	22.598	1495	5611	355	0.318048	3.72722	2028	1866	8821	4927	0.0666667	0.0201224	C3	Sertoli cells	10196	0.577939
P2#alignments.possorted.tagged_BC02368_N02	P2	21.191	1434	5298	378	0.300408	4.17185	2258	1705	8818	4855	0	0.0214334	C3	Sertoli cells	9673	0.54848
P2#alignments.possorted.tagged_BC02227_N02	P2	21.508	1488	5568	341	0.315789	4.66581	2428	1556	8816	4832	0.533333	0.0193398	C5	Stroma	9925	0.562897
P2#alignments.possorted.tagged_BC03817_N03	P2	20.384	1400	5155	354	0.292399	4.02852	1531	1753	8815	5531	0.1	0.0200794	C6	Stroma	9164	0.519796
P2#alignments.possorted.tagged_BC00934_N01	P2	20.486	1438	5249	359	0.297799	3.37587	2130	2014	8813	4669	0.166667	0.0203676	C5	PTM	10233	0.580563
P2#alignments.possorted.tagged_BC02463_N02	P2	24.557	1885	6966	432	0.395256	2.77873	1654	2332	8812	4826	2.83333	0.024512	C6	Stroma	10739	0.60934
P2#alignments.possorted.tagged_BC00918_N01	P2	15.516	1285	4848	322	0.275111	3.29805	1652	2050	8811	5109	0.166667	0.0182726	C5	PTM	9673	0.548916
P2#alignments.possorted.tagged_BC00948_N01	P2	14.333	1368	5217	366	0.296084	4.25343	2503	1677	8810	4630	0.166667	0.0207719	C6	Stroma	10413	0.590976
P2#alignments.possorted.tagged_BC02669_N02	P2	20.618	1364	5231	392	0.296912	3.15323	1966	2121	8809	4722	1.9	0.02225	C5	PTM	10401	0.590362
P2#alignments.possorted.tagged_BC01684_N02	P2	19.438	1443	5293	341	0.3005	4.37012	2123	1640	8807	5044	1	0.0193596	C5	PTM	9608	0.545475
P2#alignments.possorted.tagged_BC00884_N01	P2	19.75	1506	5702	412	0.323757	3.15573	2157	2119	8806	4530	2.4	0.0233931	C6	Stroma	9248	0.525097
P2#alignments.possorted.tagged_BC01433_N02	P2	20.05	1458	5460	324	0.310122	3.13286	1464	2130	8803	5209	0.633333	0.0184028	C5	PTM	10752	0.610701
P2#alignments.possorted.tagged_BC00980_N01	P2	16.565	1397	5329	403	0.302784	4.55556	2192	1584	8800	5024	0.0333333	0.0228977	C3	Sertoli cells	9331	0.53017
P2#alignments.possorted.tagged_BC05155_N05	P2	25.13	1929	6821	358	0.387601	2.16853	507	2777	8799	5515	1.06667	0.0203432	C5	PTM	11557	0.656722
P2#alignments.possorted.tagged_BC02432_N02	P2	22.403	1731	6385	373	0.362867	3.17561	1904	2107	8798	4787	4.7	0.021198	C6	Stroma	10864	0.617413
P2#alignments.possorted.tagged_BC01130_N02	P2	16.318	1335	4978	356	0.283034	3.24831	2029	2070	8794	4695	0.6	0.0202411	C5	PTM	9761	0.554981
P2#alignments.possorted.tagged_BC00930_N01	P2	17.614	1272	4994	300	0.28404	3.19418	1966	2096	8791	4729	0.933333	0.0170629	C6	Stroma	9096	0.517347
P2#alignments.possorted.tagged_BC03544_N03	P2	18.965	1427	5404	374	0.30736	3.60021	1733	1911	8791	5147	0.633333	0.0212718	C5	PTM	9837	0.559493
P2#alignments.possorted.tagged_BC00973_N01	P2	17.862	1344	5031	315	0.28621	4.71085	2629	1539	8789	4621	1.33333	0.0179201	C5	PTM	9897	0.563033
P2#alignments.possorted.tagged_BC00921_N01	P2	17.434	1620	6207	370	0.353192	3.49233	1931	1956	8787	4900	0.433333	0.0210538	C6	Stroma	10555	0.600603
P2#alignments.possorted.tagged_BC02905_N02	P2	20.403	1391	5266	348	0.299681	4.29916	2321	1658	8786	4807	0.833333	0.0198042	C6	Stroma	9202	0.523674
P2#alignments.possorted.tagged_BC02775_N02	P2	16.558	1363	5355	346	0.304816	4.64887	2419	1555	8784	4810	0.533333	0.0196949	C5	PTM	10146	0.577527
P2#alignments.possorted.tagged_BC00938_N01	P2	25.28	1749	6487	427	0.369335	3.36264	1634	2013	8782	5135	1.86667	0.0243111	C6	Stroma	10611	0.604133
P2#alignments.possorted.tagged_BC03148_N03	P2	27.999	1923	6854	397	0.390452	3.32578	1750	2029	8777	4998	1.73333	0.0226159	C6	Stroma	10860	0.618662
P2#alignments.possorted.tagged_BC02932_N03	P2	22.791	1807	6241	387	0.355613	2.70097	1237	2371	8775	5167	2.26667	0.0220513	C5	PTM	11148	0.635214
P2#alignments.possorted.tagged_BC00962_N01	P2	20.429	1434	5623	379	0.320508	4.32928	2285	1646	8772	4841	1	0.0216028	C6	Stroma	9897	0.564124
P2#alignments.possorted.tagged_BC02287_N02	P2	26.246	1617	5813	379	0.331414	3.42706	1968	1981	8770	4821	1.13333	0.0216078	C5	PTM	10411	0.593558
P2#alignments.possorted.tagged_BC01725_N02	P2	15.919	1238	4801	401	0.273748	4.21964	2476	1680	8769	4613	0.333333	0.0228646	C5	PTM	9202	0.524689
P2#alignments.possorted.tagged_BC02761_N02	P2	21.796	1618	6090	407	0.347365	3.37644	1994	2003	8766	4769	0.933333	0.0232147	C5	PTM	10595	0.604324
P2#alignments.possorted.tagged_BC02979_N03	P2	19.872	1425	5237	362	0.298711	4.09355	1873	1721	8766	5172	0.466667	0.020648	C5	PTM	10255	0.58493
P2#alignments.possorted.tagged_BC00928_N01	P2	19.25	1604	5905	379	0.336851	3.18777	1836	2093	8765	4836	2.5	0.0216201	C5	PTM	10357	0.590816
P2#alignments.possorted.tagged_BC02078_N02	P2	21.381	1598	5842	385	0.333409	3.02065	1575	2179	8761	5007	0.4	0.0219724	C5	PTM	10810	0.616939
P2#alignments.possorted.tagged_BC02508_N02	P2	18.897	1336	5252	354	0.299806	3.81528	1893	1819	8759	5047	0.5	0.0202078	C6	Stroma	9376	0.535221
P2#alignments.possorted.tagged_BC00953_N01	P2	15.513	1371	5299	394	0.302696	3.70086	2000	1862	8753	4891	0.133333	0.0225066	C6	Stroma	9682	0.553068
P2#alignments.possorted.tagged_BC04106_N03	P2	18.805	1415	5377	320	0.307187	3.85413	1907	1803	8752	5042	0.866667	0.0182815	C5	PTM	10082	0.575983
P2#alignments.possorted.tagged_BC04034_N04	P2	26.859	1804	6374	369	0.36427	3.24091	1337	2063	8749	5349	4.16667	0.0210881	C6	Stroma	10196	0.582695
P2#alignments.possorted.tagged_BC03492_N03	P2	20.644	1397	5220	370	0.298422	3.36209	1813	2005	8746	4928	0.9	0.0211525	C5	PTM	10065	0.575406
P2#alignments.possorted.tagged_BC00927_N01	P2	20.856	1306	5258	337	0.300663	2.93519	1720	2222	8744	4802	3.26667	0.0192704	C7	Stroma	9527	0.544774
P2#alignments.possorted.tagged_BC03506_N03	P2	15.431	1278	4950	369	0.28344	4.38348	2021	1622	8732	5089	1.63333	0.0211292	C6	Stroma	9261	0.530291
P2#alignments.possorted.tagged_BC03810_N04	P2	27.578	1908	6956	431	0.398305	2.26186	920	2677	8732	5135	1.63333	0.0246793	C6	Stroma	11133	0.637483
P2#alignments.possorted.tagged_BC00951_N01	P2	21.274	1676	5949	348	0.340683	4.55054	2126	1573	8731	5032	2.13333	0.019929	C6	Stroma	10553	0.604341
P2#alignments.possorted.tagged_BC02982_N07	P2	28.742	1974	7101	470	0.406701	2.61341	1475	2416	8730	4839	0.933333	0.0269187	C6	Stroma	10805	0.618843
P2#alignments.possorted.tagged_BC02844_N02	P2	25.423	1669	6078	351	0.34815	3.8902	1975	1785	8729	4969	5.2	0.0201054	C6	Stroma	10496	0.601214
P2#alignments.possorted.tagged_BC05735_N06	P2	28.899	1941	6699	423	0.383721	2.51268	438	2485	8729	5806	5.2	0.0242296	C8	Innate lymph	11608	0.66491
P2#alignments.possorted.tagged_BC01010_N01	P2	18.979	1246	5025	314	0.287867	4.67122	2370	1539	8728	4819	0.0666667	0.0179881	C3	Sertoli cells	9055	0.518733
P2#alignments.possorted.tagged_BC01924_N02	P2	19.75	1516	5313	464	0.304365	2.63213	1428	2403	8728	4897	2.4	0.0265811	C6	Stroma	8839	0.506359
P2#alignments.possorted.tagged_BC02267_N02	P2	19.802	1500	5618	384	0.321838	3.79297	2020	1821	8728	4887	0.566667	0.0219982	C5	PTM	10157	0.581863
P2#alignments.possorted.tagged_BC03422_N04	P2	24.448	1889	6736	420	0.385973	1.84791	321	3064	8726	5341	1.1	0.024066	C8	Macrophages	10985	0.629441
P2#alignments.possorted.tagged_BC00959_N01	P2	20.443	1435	5612	402	0.321826	3.76709	2216	1829	8719	4674	1.4	0.0230531	C6	Stroma	10012	0.574148
P2#alignments.possorted.tagged_BC02532_N02	P2	18.42	1479	5454	362	0.313052	3.26174	1891	2044	8711	4776	0.4	0.0207783	C5	PTM	10594	0.608082
P2#alignments.possorted.tagged_BC04686_N04	P2	22.247	1820	6329	400	0.363401	2.90844	1249	2228	8708	5231	0.833333	0.0229674	C5	PTM	10988	0.630914
P2#alignments.possorted.tagged_BC01646_N02	P2	20.116	1280	4841	338	0.278122	4.40223	2344	1611	8703	4748	0.3	0.0194186	C5	PTM	10006	0.574859
P2#alignments.possorted.tagged_BC02322_N02	P2	23.28	1399	5252	381	0.301874	4.38971	2439	1614	8699	4646	0.266667	0.0218991	C5	PTM	9975	0.573342
P2#alignments.possorted.tagged_BC02560_N02	P2	21.494	1867	6787	432	0.390102	2.09793	1388	2808	8699	4503	1.76667	0.0248304	C6	Stroma	10769	0.618979
P2#alignments.possorted.tagged_BC02568_N03	P2	20.301	1425	5168	339	0.297046	4.26574	2054	1652	8699	4993	4.56667	0.019485	C6	Stroma	9960	0.57248
P2#alignments.possorted.tagged_BC00961_N01	P2	15.878	1299	5046	350	0.290234	4.01326	1944	1734	8693	5015	1.13333	0.0201311	C6	Stroma	9527	0.54797
P2#alignments.possorted.tagged_BC03877_N04	P2	29.529	1864	6638	332	0.381801	2.37199	1254	2578	8693	4861	0.266667	0.0190958	C3	Sertoli cells	9917	0.570401
P2#alignments.possorted.tagged_BC01071_N02	P2	18.825	1464	5543	366	0.319003	2.98532	1552	2180	8688	4956	1.6	0.0210635	C4	Leydig cells	9738	0.560428
P2#alignments.possorted.tagged_BC00984_N01	P2	22.197	1390	5164	355	0.297226	3.96968	2057	1748	8687	4882	0.3	0.0204328	C6	Stroma	9311	0.535916
P2#alignments.possorted.tagged_BC00944_N01	P2	21.935	1717	6108	402	0.351965	2.80403	1696	2281	8677	4700	1.03333	0.0231647	C5	PTM	10809	0.622854
P2#alignments.possorted.tagged_BC04283_N03	P2	27.073	1791	6337	417	0.365161	3.40457	1576	1970	8677	5131	1.9	0.024029	C6	Stroma	10511	0.605682
P2#alignments.possorted.tagged_BC02479_N02	P2	19.558	1284	5018	354	0.289255	2.99724	1777	2170	8674	4727	0.833333	0.0204058	C7	Stroma	9097	0.524383
P2#alignments.possorted.tagged_BC00965_N01	P2	20.741	1435	5253	360	0.302906	3.04242	1448	2145	8671	5078	0.533333	0.0207589	C5	PTM	9583	0.552589
P2#alignments.possorted.tagged_BC04010_N03	P2	22.879	1606	5913	413	0.341121	2.97934	1213	2178	8667	5276	4.96667	0.023826	C6	Stroma	10637	0.613649
P2#alignments.possorted.tagged_BC03923_N03	P2	20.85	1611	5937	360	0.342743	3.29187	1817	2018	8661	4826	0.6	0.0207828	C6	Stroma	9949	0.574356
P2#alignments.possorted.tagged_BC00991_N01	P2	18.306	1248	4620	359	0.266774	4.66318	2591	1529	8659	4539	0.166667	0.0207299	C5	PTM	8996	0.51946
P2#alignments.possorted.tagged_BC03421_N03	P2	22.376	1695	6285	386	0.362917	2.73877	970	2316	8659	5373	1.73333	0.0222889	C6	Stroma	10826	0.62513
P2#alignments.possorted.tagged_BC01777_N02	P2	22.485	1408	5244	282	0.302841	3.64734	2389	1863	8658	4406	0.366667	0.0162855	C5	PTM	10270	0.593093
P2#alignments.possorted.tagged_BC02995_N03	P2	18.008	1546	5801	326	0.335047	3.14607	1712	2088	8657	4857	0.633333	0.0188287	C6	Stroma	10296	0.594663
P2#alignments.possorted.tagged_BC01687_N02	P2	20.304	1374	5283	363	0.305199	3.63082	1998	1869	8655	4788	0.7	0.0209705	C6	Stroma	10035	0.579723
P2#alignments.possorted.tagged_BC01837_N02	P2	13.51	1153	4621	348	0.26711	3.2695	1613	2026	8650	5011	0.433333	0.0201156	C6	Stroma	9439	0.545607
P2#alignments.possorted.tagged_BC02616_N02	P2	21.073	1426	5493	358	0.317588	2.1288	889	2764	8648	4995	1.73333	0.0206984	C6	Stroma	9759	0.564235
P2#alignments.possorted.tagged_BC01213_N02	P2	26.457	1630	6111	343	0.35336	3.67658	2115	1849	8647	4683	2	0.0198335	C6	Stroma	10560	0.610616
P2#alignments.possorted.tagged_BC02988_N03	P2	16.921	1333	4900	372	0.283335	4.21532	1946	1658	8647	5043	0.866667	0.0215104	C6	Stroma	9373	0.54198
P2#alignments.possorted.tagged_BC02448_N02	P2	17.673	1428	5355	381	0.309788	4.10816	1499	1692	8643	5452	0.366667	0.022041	C6	Stroma	9667	0.559239
P2#alignments.possorted.tagged_BC01570_N02	P2	19.097	1273	4836	342	0.279829	3.87641	2253	1772	8641	4616	1.5	0.0197894	C6	Stroma	9486	0.548895
P2#alignments.possorted.tagged_BC01606_N02	P2	18.733	1192	4319	333	0.249971	4.17615	2243	1669	8639	4727	0	0.0192731	C5	Stroma	8730	0.505267
P2#alignments.possorted.tagged_BC01598_N02	P2	16.877	1304	5182	332	0.299988	3.36874	2042	1977	8637	4618	2.53333	0.0192196	C5	PTM	9764	0.565243
P2#alignments.possorted.tagged_BC04532_N04	P2	23.521	1556	5620	352	0.325344	2.76504	1430	2294	8637	4913	0.566667	0.0203774	C5	PTM	10676	0.618039
P2#alignments.possorted.tagged_BC02367_N02	P2	24.568	1799	6627	409	0.383685	3.16393	2025	2074	8636	4537	2.6	0.0236799	C6	Stroma	10440	0.604447
P2#alignments.possorted.tagged_BC02644_N02	P2	14.567	1383	5163	401	0.298923	3.76075	2135	1814	8636	4687	0.5	0.0232168	C6	Stroma	9339	0.540702
P2#alignments.possorted.tagged_BC00963_N01	P2	19.519	1449	5524	344	0.319972	3.51937	2324	1910	8632	4398	0.333333	0.0199259	C6	Stroma	9318	0.539736
P2#alignments.possorted.tagged_BC03477_N03	P2	21.171	1593	5815	363	0.336828	3.53123	1497	1905	8632	5230	2.46667	0.0210264	C6	Stroma	10092	0.584569
P2#alignments.possorted.tagged_BC03348_N03	P2	28.291	2043	6863	444	0.397578	2.91784	1244	2203	8631	5184	3.93333	0.0257212	C5	PTM	11268	0.652763
P2#alignments.possorted.tagged_BC02655_N02	P2	23.369	1487	5452	350	0.315911	3.25283	1114	2029	8629	5486	2.33333	0.0202804	C6	Stroma	9674	0.560552
P2#alignments.possorted.tagged_BC03259_N03	P2	19.895	1497	5217	430	0.3024	3.46019	2064	1934	8626	4628	0.133333	0.0249246	C3	Sertoli cells	9717	0.563239
P2#alignments.possorted.tagged_BC03876_N03	P2	20.778	1469	5282	461	0.306203	4.12173	1677	1684	8625	5264	0.966667	0.0267246	C6	Stroma	9610	0.557101
P2#alignments.possorted.tagged_BC00972_N01	P2	22.855	1662	5648	394	0.327762	3.4805	2110	1923	8616	4583	0.266667	0.0228644	C3	Sertoli cells	9716	0.563835
P2#alignments.possorted.tagged_BC02737_N02	P2	21.205	1542	5423	362	0.314778	4.18603	2205	1661	8614	4748	0.866667	0.0210123	C5	PTM	10313	0.598619
P2#alignments.possorted.tagged_BC04146_N03	P2	19.618	1496	5291	333	0.307188	3.6627	1315	1847	8612	5450	0.266667	0.0193335	C5	PTM	9984	0.579656
P2#alignments.possorted.tagged_BC01463_N02	P2	19.735	1475	5211	358	0.302578	3.77858	1773	1802	8611	5036	1.5	0.0207874	C5	PTM	9684	0.562304
P2#alignments.possorted.tagged_BC02424_N02	P2	21.287	1333	4968	327	0.288535	3.69155	2122	1835	8609	4652	0.366667	0.0189918	C5	PTM	9720	0.564525
P2#alignments.possorted.tagged_BC02564_N03	P2	21.155	1517	5708	380	0.331514	3.63348	2089	1858	8609	4662	1.33333	0.0220699	C6	Stroma	9900	0.57498
P2#alignments.possorted.tagged_BC04872_N04	P2	25.163	1563	5527	425	0.321113	3.4224	1538	1946	8606	5122	0.1	0.0246921	C3	Sertoli cells	10027	0.582559
P2#alignments.possorted.tagged_BC02289_N02	P2	18.594	1709	6087	367	0.353731	2.95586	1522	2175	8604	4907	3.43333	0.0213273	C6	Stroma	10525	0.611634
P2#alignments.possorted.tagged_BC03483_N03	P2	22.048	1659	6281	438	0.365047	3.02009	1736	2140	8603	4727	2.03333	0.0254562	C6	Stroma	10335	0.600663
P2#alignments.possorted.tagged_BC01421_N02	P2	16.545	1387	5070	375	0.294802	4.28194	1964	1628	8599	5007	2	0.0218049	C6	Stroma	9566	0.556227
P2#alignments.possorted.tagged_BC02087_N03	P2	21.961	1353	4972	347	0.289103	4.06419	1953	1698	8599	4948	0.4	0.0201768	C5	PTM	9605	0.558495
P2#alignments.possorted.tagged_BC00937_N01	P2	22.354	1524	5721	380	0.332732	3.02481	1882	2136	8597	4579	3.36667	0.0221007	C6	Stroma	9724	0.565546
P2#alignments.possorted.tagged_BC03299_N03	P2	23.647	1433	5343	385	0.310784	3.71014	1974	1825	8596	4797	1.7	0.0223941	C5	PTM	10217	0.594288
P2#alignments.possorted.tagged_BC02177_N02	P2	20.486	1438	5156	321	0.299942	3.51893	2235	1902	8595	4458	0.1	0.0186736	C3	Sertoli cells	9729	0.565969
P2#alignments.possorted.tagged_BC00989_N02	P2	19.137	1440	5897	354	0.343128	2.36716	1726	2552	8593	4315	1.43333	0.0205982	C7	Stroma	9470	0.55103
P2#alignments.possorted.tagged_BC02588_N02	P2	22.569	1835	6617	405	0.385112	3.50971	1956	1905	8591	4730	3.16667	0.0235712	C7	Stroma	10526	0.612618
P2#alignments.possorted.tagged_BC01829_N02	P2	20.585	1393	5278	380	0.307325	3.88453	2005	1758	8587	4824	2.93333	0.0221265	C6	Stroma	10367	0.603645
P2#alignments.possorted.tagged_BC01303_N02	P2	18.361	1363	5118	372	0.298078	3.41615	2063	1944	8585	4578	0.266667	0.0216657	C5	PTM	9918	0.577635
P2#alignments.possorted.tagged_BC02733_N03	P2	20.644	1741	6008	389	0.349913	3.07258	1232	2108	8585	5245	2.93333	0.0226558	C6	Stroma	10524	0.61293
P2#alignments.possorted.tagged_BC02594_N02	P2	16.117	1522	5574	377	0.324712	3.5923	2102	1869	8583	4612	1.73333	0.021962	C6	Stroma	10015	0.583421
P2#alignments.possorted.tagged_BC01156_N02	P2	26.398	1973	7002	404	0.407947	1.8664	1137	2994	8582	4451	2	0.0235376	C7	Vascular mural cells	11085	0.645828
P2#alignments.possorted.tagged_BC03132_N03	P2	19.551	1402	5083	388	0.296281	4.02814	1762	1706	8578	5110	1.2	0.022616	C6	Stroma	9641	0.561961
P2#alignments.possorted.tagged_BC02119_N02	P2	19.005	1478	5542	365	0.323149	3.18293	1938	2050	8575	4587	0.666667	0.0212828	C5	PTM	10322	0.601866
P2#alignments.possorted.tagged_BC02589_N02	P2	22.037	1469	5577	384	0.325265	3.30588	1672	1991	8573	4910	0.933333	0.0223959	C5	PTM	9950	0.58031
P2#alignments.possorted.tagged_BC01003_N01	P2	25.905	1596	5780	405	0.337144	3.44606	1827	1928	8572	4817	4.1	0.0236234	C6	Stroma	9939	0.579736
P2#alignments.possorted.tagged_BC01980_N02	P2	17.525	1301	4975	317	0.290223	4.01521	2321	1709	8571	4541	0.266667	0.0184926	C6	Stroma	9003	0.525201
P2#alignments.possorted.tagged_BC03229_N03	P2	17.223	1322	4945	338	0.288473	3.82058	2015	1778	8571	4778	0.7	0.0197177	C5	PTM	9662	0.563645
P2#alignments.possorted.tagged_BC00982_N01	P2	21.339	1735	6364	392	0.371425	3.01641	1598	2133	8567	4836	0.6	0.0228785	C6	Stroma	10239	0.597584
P2#alignments.possorted.tagged_BC01628_N02	P2	21.091	1342	5271	366	0.307706	4.05608	2346	1694	8565	4525	4.86667	0.021366	C8	Neutrophils	9429	0.550438
P2#alignments.possorted.tagged_BC02482_N02	P2	22.648	1544	5715	385	0.333625	3.6983	2169	1823	8565	4573	0.433333	0.0224752	C5	PTM	10149	0.592469
P2#alignments.possorted.tagged_BC00994_N01	P2	18.374	1364	5466	377	0.319276	3.21883	1843	2029	8560	4688	0.566667	0.022021	C6	Stroma	10229	0.597488
P2#alignments.possorted.tagged_BC02386_N04	P2	24.265	1642	6133	376	0.358278	3.16294	1653	2056	8559	4850	2.66667	0.0219652	C6	Stroma	10433	0.609475
P2#alignments.possorted.tagged_BC01553_N02	P2	22.639	1532	5377	367	0.314151	3.12235	1575	2076	8558	4907	0.0333333	0.0214419	C3	Sertoli cells	9727	0.568299
P2#alignments.possorted.tagged_BC01001_N01	P2	19.46	1307	4788	301	0.279804	4.00937	2486	1708	8556	4362	0.166667	0.01759	C5	PTM	9618	0.562062
P2#alignments.possorted.tagged_BC05125_N05	P2	21.694	1479	5403	323	0.315854	3.01927	631	2128	8553	5794	0.533333	0.0188823	C5	PTM	10357	0.60546
P2#alignments.possorted.tagged_BC02643_N02	P2	21.718	1689	6039	350	0.353075	2.50492	919	2440	8552	5193	1.16667	0.020463	C6	Stroma	11209	0.655344
P2#alignments.possorted.tagged_BC01930_N02	P2	15.015	1145	4542	258	0.265863	4.06643	2223	1686	8542	4633	0.166667	0.0151018	C5	PTM	9575	0.560466
P2#alignments.possorted.tagged_BC03444_N03	P2	22.589	1540	5363	337	0.313919	3.58262	1658	1864	8542	5020	1.46667	0.0197261	C5	PTM	10419	0.609869
P2#alignments.possorted.tagged_BC03654_N03	P2	16.801	1349	5072	341	0.296886	3.26887	1906	2001	8542	4635	0.566667	0.0199602	C5	PTM	9940	0.581831
P2#alignments.possorted.tagged_BC00974_N01	P2	19.118	1622	5882	329	0.34442	3.2695	2355	2000	8539	4184	1.9	0.0192646	C6	Stroma	9939	0.581977
P2#alignments.possorted.tagged_BC03912_N03	P2	23.673	1590	5730	412	0.335716	3.72798	1729	1805	8534	5000	0.2	0.0241387	C3	Sertoli cells	9984	0.584954
P2#alignments.possorted.tagged_BC01019_N01	P2	23.976	1344	4908	327	0.287589	3.92667	2105	1732	8533	4696	0.566667	0.0191609	C5	PTM	9613	0.563284
P2#alignments.possorted.tagged_BC00975_N01	P2	18.557	1312	5004	384	0.293352	3.65811	1927	1831	8529	4771	0.933333	0.0225114	C5	PTM	9588	0.562082
P2#alignments.possorted.tagged_BC02654_N03	P2	22.844	1592	5478	367	0.32114	3.70176	1178	1814	8529	5537	0.433333	0.0215148	C5	PTM	10690	0.626685
P2#alignments.possorted.tagged_BC04270_N03	P2	26	1615	5945	434	0.348639	3.44294	1578	1919	8526	5029	0.833333	0.0254516	C5	PTM	10272	0.602393
P2#alignments.possorted.tagged_BC00993_N01	P2	18.729	1466	5421	348	0.317947	3.9564	2191	1720	8525	4614	0.133333	0.0204106	C6	Stroma	9534	0.559179
P2#alignments.possorted.tagged_BC03094_N03	P2	23.681	1746	6251	403	0.367144	2.38086	1525	2518	8513	4470	0.233333	0.0236697	C5	PTM	10836	0.636438
P2#alignments.possorted.tagged_BC01040_N01	P2	20.808	1324	4931	325	0.28965	4.5634	2160	1530	8512	4822	0.933333	0.0190907	C5	Stroma	9068	0.53266
P2#alignments.possorted.tagged_BC02611_N02	P2	22.12	1441	5274	400	0.30998	3.71041	2247	1806	8507	4454	0.9	0.0235101	C5	PTM	9753	0.573234
P2#alignments.possorted.tagged_BC04299_N04	P2	24.512	1832	6275	384	0.368814	3.38279	1514	1941	8507	5052	2.26667	0.0225696	C6	Stroma	10550	0.620078
P2#alignments.possorted.tagged_BC02464_N02	P2	19.441	1561	5650	359	0.332119	3.5511	1827	1869	8506	4810	0.0666667	0.0211028	C3	Sertoli cells	10010	0.588408
P2#alignments.possorted.tagged_BC03396_N04	P2	22.653	1716	5839	385	0.343269	2.69783	1311	2300	8505	4894	0.433333	0.0226337	C5	PTM	10244	0.602234
P2#alignments.possorted.tagged_BC01011_N01	P2	19.465	1327	4953	371	0.291216	3.80452	1917	1770	8504	4817	3.6	0.0218133	C5	PTM	9303	0.546978
P2#alignments.possorted.tagged_BC03092_N03	P2	17.938	1395	5127	327	0.301482	3.38525	1387	1939	8503	5177	0.333333	0.0192285	C4	Leydig cells	9447	0.55551
P2#alignments.possorted.tagged_BC02623_N02	P2	18.634	1468	5561	355	0.327272	3.14237	1949	2051	8496	4496	1.63333	0.0208922	C6	Stroma	9723	0.57221
P2#alignments.possorted.tagged_BC02280_N02	P2	25.666	1672	5976	418	0.351736	3.62439	1933	1837	8495	4725	0.7	0.0246027	C5	PTM	9688	0.570218
P2#alignments.possorted.tagged_BC03880_N03	P2	19.589	1474	5639	345	0.331901	4.20208	2210	1633	8495	4652	1.46667	0.0203061	C6	Stroma	9854	0.579988
P2#alignments.possorted.tagged_BC02351_N02	P2	24.991	1729	6293	365	0.370482	2.7966	1441	2237	8493	4815	1.23333	0.0214883	C5	PTM	10342	0.608854
P2#alignments.possorted.tagged_BC02005_N02	P2	18.585	1558	5571	384	0.328015	3.87486	2013	1742	8492	4737	1.73333	0.0226095	C6	Stroma	9895	0.582607
P2#alignments.possorted.tagged_BC02549_N02	P2	18.389	1458	5272	313	0.31041	4.04575	2002	1683	8492	4807	1.1	0.0184291	C6	Stroma	9219	0.542805
P2#alignments.possorted.tagged_BC04151_N04	P2	15.746	1153	4445	351	0.261748	3.60217	1521	1845	8491	5125	0.166667	0.0206689	C5	PTM	9160	0.539395
P2#alignments.possorted.tagged_BC02831_N03	P2	18.252	1484	5493	407	0.323536	3.94697	1857	1716	8489	4916	0.0666667	0.0239722	C3	Sertoli cells	9634	0.56744
P2#alignments.possorted.tagged_BC02326_N02	P2	14.851	1125	4512	406	0.26585	3.3318	2209	1959	8486	4318	0.1	0.0239218	C6	Stroma	7911	0.466121
P2#alignments.possorted.tagged_BC01028_N01	P2	15.34	1100	4339	355	0.255777	4.21648	2239	1626	8482	4617	0.1	0.0209267	C5	PTM	8608	0.507427
P2#alignments.possorted.tagged_BC02478_N02	P2	17.464	1464	5480	351	0.323189	3.77365	2114	1776	8478	4588	1.6	0.0207006	C5	PTM	9391	0.553845
P2#alignments.possorted.tagged_BC02498_N02	P2	23.615	1598	6033	429	0.355803	3.83904	2456	1752	8478	4270	0.3	0.0253008	C6	Stroma	9617	0.567174
P2#alignments.possorted.tagged_BC02879_N03	P2	17.06	1456	5447	401	0.321395	3.64074	1467	1826	8474	5181	0.233333	0.0236606	C6	Stroma	9573	0.564845
P2#alignments.possorted.tagged_BC04805_N04	P2	18.241	1566	5644	337	0.333058	2.16275	612	2679	8473	5182	0.266667	0.0198867	C5	PTM	10207	0.602325
P2#alignments.possorted.tagged_BC04836_N04	P2	31.079	2056	7118	401	0.42004	1.95742	477	2865	8473	5131	0.233333	0.0236634	C3	Sertoli cells	11159	0.658503
P2#alignments.possorted.tagged_BC04468_N04	P2	22.991	1788	6336	415	0.374026	3.47202	1395	1894	8470	5181	5.46667	0.0244982	C6	Stroma	10291	0.607497
P2#alignments.possorted.tagged_BC01862_N02	P2	18.356	1409	5283	351	0.311902	4.65354	2342	1498	8469	4629	1	0.0207226	C6	Stroma	9267	0.547113
P2#alignments.possorted.tagged_BC04777_N04	P2	23.615	1920	6292	387	0.371472	2.86183	945	2193	8469	5331	3.7	0.022848	C4	Leydig cells	10442	0.616484
P2#alignments.possorted.tagged_BC02345_N02	P2	23.114	1354	5132	329	0.303059	4.2201	1869	1622	8467	4976	2.4	0.0194284	C6	Stroma	9672	0.571159
P2#alignments.possorted.tagged_BC00985_N01	P2	20.113	1422	5573	360	0.32914	3.48411	2015	1888	8466	4563	0.4	0.0212615	C6	Stroma	9613	0.567742
P2#alignments.possorted.tagged_BC02114_N02	P2	18.945	1349	4929	360	0.29114	3.49549	1838	1883	8465	4744	0.9	0.021264	C6	Stroma	8503	0.502245
P2#alignments.possorted.tagged_BC04298_N03	P2	22.421	1721	6060	407	0.357944	3.02712	1468	2102	8465	4895	3.2	0.0240402	C6	Stroma	10364	0.612168
P2#alignments.possorted.tagged_BC02599_N02	P2	24.322	1781	6207	419	0.366671	3.24048	1798	1996	8464	4670	1.43333	0.0247519	C5	PTM	10607	0.626595
P2#alignments.possorted.tagged_BC01936_N02	P2	22.371	1672	6152	384	0.363507	3.06046	1569	2084	8462	4809	4.1	0.0226897	C6	Stroma	10550	0.623375
P2#alignments.possorted.tagged_BC02454_N02	P2	19.721	1464	5214	337	0.308083	3.49628	1933	1882	8462	4647	0.5	0.0199126	C5	PTM	10019	0.592
P2#alignments.possorted.tagged_BC01045_N01	P2	22.896	1665	5985	428	0.353682	3.55382	1726	1858	8461	4877	0.6	0.0252925	C6	Stroma	9966	0.588937
P2#alignments.possorted.tagged_BC02698_N02	P2	21.875	1646	6032	394	0.356628	3.64926	2084	1819	8457	4554	1.26667	0.0232943	C6	Stroma	10085	0.596252
P2#alignments.possorted.tagged_BC03349_N03	P2	27.836	1715	6014	356	0.355648	2.91616	1341	2159	8455	4955	0.3	0.0210526	C3	Sertoli cells	10250	0.60615
P2#alignments.possorted.tagged_BC01730_N02	P2	25.811	1499	5420	347	0.320672	4.37938	2107	1571	8451	4773	1.46667	0.0205301	C6	Stroma	9192	0.543841
P2#alignments.possorted.tagged_BC03329_N04	P2	18.674	1358	5124	333	0.303231	3.16412	1445	2029	8449	4975	1.13333	0.0197065	C5	PTM	10274	0.608001
P2#alignments.possorted.tagged_BC02382_N02	P2	16.92	1444	5483	350	0.324515	3.38402	2062	1927	8448	4459	1.03333	0.020715	C6	Stroma	9359	0.553918
P2#alignments.possorted.tagged_BC04831_N04	P2	22.157	1656	5742	404	0.340045	2.69335	594	2286	8443	5563	3.1	0.0239251	C6	Stroma	9879	0.585041
P2#alignments.possorted.tagged_BC02622_N02	P2	20.677	1347	5167	319	0.306066	4.04543	2221	1673	8441	4547	1.3	0.0188959	C6	Stroma	9644	0.571259
P2#alignments.possorted.tagged_BC01070_N01	P2	17.822	1224	4490	352	0.26609	4.51078	2106	1531	8437	4800	0.633333	0.0208605	C6	Stroma	8759	0.519083
P2#alignments.possorted.tagged_BC03924_N03	P2	18.683	1302	5023	312	0.297677	3.77746	2054	1766	8437	4617	0.533333	0.01849	C5	PTM	9699	0.57479
P2#alignments.possorted.tagged_BC01023_N01	P2	18.303	1331	4917	377	0.291464	3.4748	2153	1885	8435	4397	0.1	0.0223474	C3	Sertoli cells	9258	0.548785
P2#alignments.possorted.tagged_BC01360_N02	P2	12.312	715	2786	361	0.165184	1.51731	345	3350	8433	4738	0.3	0.021404	C6	Stroma	5417	0.321179
P2#alignments.possorted.tagged_BC04153_N04	P2	23.377	1759	6546	328	0.38821	2.90867	931	2157	8431	5343	1.5	0.019452	C5	PTM	11292	0.669671
P2#alignments.possorted.tagged_BC04095_N03	P2	19.5	1615	6060	380	0.359473	3.36284	1850	1932	8429	4647	1.76667	0.0225412	C6	Stroma	10286	0.610155
P2#alignments.possorted.tagged_BC02506_N02	P2	18.99	1333	5123	415	0.303927	3.84646	2098	1739	8428	4591	2	0.0246203	C6	Stroma	9327	0.553334
P2#alignments.possorted.tagged_BC01738_N02	P2	17.583	1323	4960	303	0.294327	3.55952	2077	1848	8426	4501	0.1	0.0179801	C5	PTM	9781	0.580406
P2#alignments.possorted.tagged_BC02198_N02	P2	22.365	1536	5750	396	0.341206	3.91599	1508	1714	8426	5204	0.9	0.0234987	C6	Stroma	10014	0.594232
P2#alignments.possorted.tagged_BC04558_N04	P2	29.585	2002	6531	383	0.387596	2.22673	198	2611	8425	5616	1.5	0.02273	C5	PTM	10992	0.652344
P2#alignments.possorted.tagged_BC03847_N04	P2	24.298	1632	5611	380	0.333076	1.7689	398	3042	8423	4983	1.93333	0.0225573	C5	PTM	9947	0.590467
P2#alignments.possorted.tagged_BC01078_N01	P2	18.898	1212	4416	346	0.262171	3.96873	2036	1695	8422	4691	0.233333	0.0205414	C5	PTM	8863	0.526181
P2#alignments.possorted.tagged_BC01073_N01	P2	18.161	1394	5174	351	0.307427	3.98814	1876	1687	8415	4852	0.133333	0.0208556	C6	Stroma	8578	0.509685
P2#alignments.possorted.tagged_BC02857_N02	P2	29.498	2160	7423	415	0.44111	3.48986	2512	1874	8414	4028	3.76667	0.0246613	C6	Stroma	11193	0.665141
P2#alignments.possorted.tagged_BC02499_N02	P2	24.428	1357	5096	327	0.302865	4.54947	2309	1516	8413	4588	3.73333	0.0194342	C6	Stroma	9565	0.568465
P2#alignments.possorted.tagged_BC01046_N01	P2	19.905	1347	5091	353	0.302639	3.97104	2173	1692	8411	4546	0.433333	0.0209844	C5	PTM	9586	0.569849
P2#alignments.possorted.tagged_BC02776_N02	P2	21.04	1360	4965	299	0.295219	4.16523	1986	1628	8409	4795	1.43333	0.0177786	C5	PTM	9629	0.572541
P2#alignments.possorted.tagged_BC02528_N02	P2	21.428	1331	4818	313	0.286581	2.73103	1237	2253	8406	4916	0.166667	0.0186177	C4	Leydig cells	9400	0.559124
P2#alignments.possorted.tagged_BC01049_N01	P2	19.948	1370	5145	361	0.306104	3.47497	1833	1878	8404	4693	0.833333	0.0214779	C6	Stroma	9140	0.543789
P2#alignments.possorted.tagged_BC03695_N03	P2	22.715	1388	5221	381	0.310848	3.97217	1729	1689	8398	4980	1.8	0.022684	C5	PTM	9716	0.578471
P2#alignments.possorted.tagged_BC02124_N02	P2	21.609	1375	5331	345	0.317624	3.97451	1857	1687	8392	4848	1.63333	0.0205553	C5	PTM	9679	0.57668
P2#alignments.possorted.tagged_BC02679_N02	P2	22.801	1589	5616	367	0.334684	3.32029	1798	1942	8390	4650	0.566667	0.0218713	C6	Stroma	9286	0.553397
P2#alignments.possorted.tagged_BC03289_N03	P2	25.528	1908	6545	428	0.390141	3.02688	1356	2083	8388	4949	3.43333	0.0255126	C6	Stroma	10875	0.648247
P2#alignments.possorted.tagged_BC04362_N03	P2	23.045	1734	5925	407	0.353225	3.51642	1709	1857	8387	4821	2.43333	0.0242637	C6	Stroma	9949	0.59312
P2#alignments.possorted.tagged_BC02373_N03	P2	21.682	1511	5642	379	0.336394	3.48929	1540	1868	8386	4978	1.66667	0.0225972	C5	PTM	9880	0.589077
P2#alignments.possorted.tagged_BC02208_N02	P2	16.185	1365	5111	401	0.30477	2.96079	1879	2117	8385	4389	0.0333333	0.0239117	C6	Stroma	9297	0.554383
P2#alignments.possorted.tagged_BC03699_N03	P2	20.805	1618	5581	376	0.332797	3.4248	1528	1895	8385	4962	1.6	0.022421	C6	Stroma	9702	0.578533
P2#alignments.possorted.tagged_BC04707_N04	P2	23.699	1496	5120	346	0.305635	3.52268	1677	1852	8376	4847	1.23333	0.0206543	C5	Stroma	9688	0.578319
P2#alignments.possorted.tagged_BC02055_N02	P2	21.254	1288	4938	422	0.294841	4.44828	2147	1537	8374	4690	0.266667	0.025197	C6	Stroma	9345	0.557977
P2#alignments.possorted.tagged_BC04111_N04	P2	24.202	1760	5936	402	0.354473	3.24594	1034	1972	8373	5367	0.233333	0.0240057	C3	Sertoli cells	10056	0.600502
P2#alignments.possorted.tagged_BC02517_N02	P2	18.777	1356	5100	369	0.304659	3.53905	1969	1844	8370	4557	0.0666667	0.022043	C5	PTM	9436	0.56368
P2#alignments.possorted.tagged_BC01056_N01	P2	24.752	1625	5705	376	0.340841	2.95697	1335	2115	8369	4919	3.66667	0.0224639	C6	Stroma	9706	0.579878
P2#alignments.possorted.tagged_BC02625_N02	P2	18.435	1322	4790	320	0.286244	3.6743	1932	1790	8367	4645	1.23333	0.0191227	C5	PTM	9537	0.569918
P2#alignments.possorted.tagged_BC01060_N01	P2	21.261	1428	5361	371	0.320404	4.45372	2156	1534	8366	4676	0.7	0.0221731	C6	Stroma	9310	0.556419
P2#alignments.possorted.tagged_BC01018_N01	P2	15.638	1232	4960	327	0.296473	2.95135	1967	2117	8365	4281	1.06667	0.0195457	C6	Stroma	9375	0.560371
P2#alignments.possorted.tagged_BC01059_N01	P2	22.757	1448	5375	371	0.321433	3.03329	1662	2073	8361	4626	0.6	0.0221863	C5	PTM	10026	0.599569
P2#alignments.possorted.tagged_BC01000_N01	P2	16.446	1279	5193	340	0.310586	3.00383	1936	2088	8360	4336	0.833333	0.0203349	C6	Stroma	9156	0.547608
P2#alignments.possorted.tagged_BC01106_N01	P2	19.931	1238	4962	336	0.29677	4.65247	2125	1479	8360	4756	0.966667	0.0200957	C5	PTM	9402	0.562321
P2#alignments.possorted.tagged_BC03531_N03	P2	16.568	1322	4918	334	0.294139	3.33835	1822	1927	8360	4611	0.6	0.0199761	C4	Leydig cells	9331	0.558074
P2#alignments.possorted.tagged_BC01955_N02	P2	17.426	1408	5375	341	0.321625	3.86097	2046	1719	8356	4591	0.0333333	0.0204045	C6	Stroma	9350	0.559478
P2#alignments.possorted.tagged_BC02542_N02	P2	17.008	1254	4719	361	0.282372	3.6448	2123	1799	8356	4434	0.4	0.0216012	C5	PTM	9657	0.577848
P2#alignments.possorted.tagged_BC01084_N01	P2	16.014	1205	4521	311	0.270719	3.76055	2018	1754	8350	4578	0.133333	0.0186228	C5	PTM	9063	0.542695
P2#alignments.possorted.tagged_BC01768_N02	P2	17.553	1374	4996	370	0.299233	3.21829	2066	1979	8348	4303	0.566667	0.022161	C5	PTM	9390	0.56241
P2#alignments.possorted.tagged_BC02181_N02	P2	19.717	1394	5216	347	0.31241	4.01683	2405	1664	8348	4279	0.333333	0.0207834	C5	PTM	9456	0.566363
P2#alignments.possorted.tagged_BC02609_N03	P2	20.256	1473	5319	346	0.318617	3.39547	1524	1899	8347	4924	3.43333	0.020726	C4	Leydig cells	9570	0.57326
P2#alignments.possorted.tagged_BC04084_N03	P2	21.241	1491	5759	367	0.345057	3.1271	1961	2022	8345	4362	0.766667	0.0219892	C6	Stroma	9688	0.580467
P2#alignments.possorted.tagged_BC02653_N02	P2	17.729	1334	5090	347	0.30501	4.0024	2196	1668	8344	4480	0.133333	0.0207934	C6	Stroma	9231	0.553152
P2#alignments.possorted.tagged_BC01099_N01	P2	17.852	1181	4689	305	0.281048	4.32695	2276	1566	8342	4500	1.13333	0.018281	C6	Stroma	8715	0.522357
P2#alignments.possorted.tagged_BC04556_N04	P2	18.053	1249	4602	338	0.275833	3.10531	1515	2032	8342	4795	0.3	0.0202589	C5	PTM	8980	0.53824
P2#alignments.possorted.tagged_BC01030_N01	P2	20.951	1386	5225	384	0.313212	3.24478	1880	1965	8341	4496	1.2	0.0230188	C5	PTM	9467	0.567498
P2#alignments.possorted.tagged_BC02029_N02	P2	15.991	1284	4899	322	0.29367	4.67415	2029	1470	8341	4842	0.266667	0.0193022	C6	Stroma	9707	0.581885
P2#alignments.possorted.tagged_BC01052_N01	P2	19.802	1290	4737	368	0.283993	3.6205	2146	1805	8340	4389	0.466667	0.0220624	C6	Stroma	8428	0.505276
P2#alignments.possorted.tagged_BC02537_N02	P2	21.931	1329	4927	327	0.295384	3.89437	1958	1704	8340	4678	1.26667	0.0196043	C5	PTM	9809	0.58807
P2#alignments.possorted.tagged_BC01065_N01	P2	20.674	1138	4314	322	0.258664	3.81745	2229	1731	8339	4379	0.2	0.0193069	C5	PTM	9120	0.546828
P2#alignments.possorted.tagged_BC03012_N03	P2	24.548	1624	6028	418	0.361521	3.65234	1899	1792	8337	4646	1.26667	0.025069	C6	Stroma	9924	0.595178
P2#alignments.possorted.tagged_BC01031_N01	P2	19.831	1352	5041	390	0.302581	3.7009	2032	1772	8330	4526	1.66667	0.0234094	C5	PTM	9573	0.57461
P2#alignments.possorted.tagged_BC03987_N03	P2	20.403	1391	5123	353	0.307503	2.95349	1288	2107	8330	4935	0.7	0.0211885	C5	PTM	9903	0.594418
P2#alignments.possorted.tagged_BC01391_N02	P2	18.571	1388	5132	394	0.308117	4.1791	1916	1608	8328	4804	1.86667	0.0236551	C6	Stroma	9216	0.553314
P2#alignments.possorted.tagged_BC03304_N03	P2	25.793	1524	5556	390	0.333573	4.01083	1718	1662	8328	4948	0.133333	0.023415	C3	Sertoli cells	9466	0.568324
P2#alignments.possorted.tagged_BC02794_N02	P2	18.41	1283	4826	368	0.28985	3.81492	2049	1729	8325	4547	1.16667	0.0221021	C5	PTM	9012	0.541261
P2#alignments.possorted.tagged_BC03882_N03	P2	28.325	1645	5660	390	0.340062	3.69904	1437	1771	8322	5114	0.2	0.0234319	C3	Sertoli cells	9709	0.583333
P2#alignments.possorted.tagged_BC02414_N03	P2	18.489	1774	6237	428	0.37491	3.38482	1455	1897	8318	4966	1.6	0.0257273	C8	Macrophages	8714	0.523804
P2#alignments.possorted.tagged_BC02487_N02	P2	20.085	1562	6173	386	0.371152	2.51479	1708	2366	8316	4242	0.966667	0.0232083	C6	Stroma	10456	0.628668
P2#alignments.possorted.tagged_BC02555_N02	P2	19.528	1499	5601	369	0.336963	3.76002	1906	1746	8311	4659	2.76667	0.0221995	C6	Stroma	9644	0.580195
P2#alignments.possorted.tagged_BC01064_N01	P2	19.431	1521	5913	367	0.355776	3.49675	2272	1848	8310	4190	0.233333	0.0220818	C6	Stroma	9727	0.585259
P2#alignments.possorted.tagged_BC04978_N04	P2	22.932	1656	5853	322	0.352251	3.61812	1574	1799	8308	4935	1.83333	0.0193789	C6	Stroma	9904	0.596052
P2#alignments.possorted.tagged_BC03957_N03	P2	19.25	1361	5003	328	0.301132	3.74957	1650	1749	8307	4908	2.03333	0.0197424	C5	PTM	9700	0.583845
P2#alignments.possorted.tagged_BC01136_N01	P2	17.102	1330	5118	321	0.308091	5.05835	2287	1371	8306	4648	0.333333	0.0193234	C6	Leydig cells	8998	0.541657
P2#alignments.possorted.tagged_BC03797_N03	P2	23.775	1837	6409	376	0.385945	2.71832	968	2233	8303	5102	1.13333	0.0226424	C5	PTM	10588	0.637601
P2#alignments.possorted.tagged_BC04139_N04	P2	24.143	1585	5732	383	0.345176	3.38153	1490	1895	8303	4918	0.266667	0.023064	C3	Sertoli cells	9765	0.58804
P2#alignments.possorted.tagged_BC01077_N01	P2	22.516	1535	5415	380	0.326126	3.381	1743	1895	8302	4664	1.5	0.0228861	C5	PTM	9930	0.598049
P2#alignments.possorted.tagged_BC03008_N03	P2	23.452	1587	5835	370	0.351591	3.4565	1743	1862	8298	4693	0.233333	0.0222945	C3	Sertoli cells	9810	0.591106
P2#alignments.possorted.tagged_BC03098_N03	P2	22.161	1522	5178	335	0.312003	2.65873	1168	2268	8298	4862	0.633333	0.0201856	C5	PTM	10049	0.605507
P2#alignments.possorted.tagged_BC02801_N02	P2	17.002	1494	5907	370	0.355972	2.88436	1454	2136	8297	4707	1.56667	0.0222972	C6	Stroma	9960	0.600217
P2#alignments.possorted.tagged_BC03643_N03	P2	29.85	1628	5784	361	0.348602	3.08469	1333	2031	8296	4932	3.76667	0.0217575	C6	Stroma	9752	0.587753
P2#alignments.possorted.tagged_BC02745_N02	P2	21.169	1657	6027	384	0.363423	2.76738	1340	2201	8292	4751	1.53333	0.0231548	C6	Stroma	9904	0.597202
P2#alignments.possorted.tagged_BC02548_N02	P2	21.098	1449	5401	383	0.325715	3.548	1814	1823	8291	4654	1.13333	0.0230973	C5	PTM	9534	0.574961
P2#alignments.possorted.tagged_BC02261_N02	P2	17.624	1335	5056	434	0.305093	3.71063	2202	1759	8286	4325	2.53333	0.0261888	C5	PTM	9862	0.5951
P2#alignments.possorted.tagged_BC04048_N03	P2	21.596	1625	5910	311	0.356626	3.07575	1473	2033	8286	4780	0.833333	0.0187666	C5	PTM	10277	0.620142
P2#alignments.possorted.tagged_BC01121_N01	P2	22.14	1487	5421	422	0.327355	3.81395	1986	1720	8280	4574	0.4	0.0254831	C5	PTM	9269	0.559722
P2#alignments.possorted.tagged_BC01125_N01	P2	19.486	1417	5575	317	0.336655	4.20755	2485	1590	8280	4205	0.3	0.0191425	C6	Stroma	9721	0.587017
P2#alignments.possorted.tagged_BC02674_N02	P2	24.228	1456	5404	332	0.326329	4.15567	2244	1606	8280	4430	0.0666667	0.0200483	C3	Sertoli cells	9719	0.586896
P2#alignments.possorted.tagged_BC02843_N02	P2	23.444	1693	6245	369	0.377159	3.1919	1507	1975	8279	4797	0.566667	0.0222853	C5	PTM	10354	0.625317
P2#alignments.possorted.tagged_BC01042_N01	P2	16.953	1190	4573	306	0.276348	3.7226	1655	1752	8274	4867	0.2	0.0184917	C6	Stroma	8802	0.531907
P2#alignments.possorted.tagged_BC01102_N01	P2	15.873	1010	4029	331	0.243474	3.86706	2043	1700	8274	4531	0.0666667	0.0200024	C5	PTM	8535	0.515772
P2#alignments.possorted.tagged_BC03320_N03	P2	20.178	1396	5332	384	0.322253	3.64514	1947	1781	8273	4545	0.8	0.023208	C5	PTM	9811	0.592953
P2#alignments.possorted.tagged_BC01047_N01	P2	19.018	1431	5334	366	0.322413	3.81771	2072	1717	8272	4483	1.46667	0.0221228	C5	PTM	9568	0.578337
P2#alignments.possorted.tagged_BC01964_N02	P2	21.923	1406	5186	365	0.313467	3.90047	2060	1688	8272	4524	4.43333	0.0220624	C6	Stroma	9209	0.556637
P2#alignments.possorted.tagged_BC03967_N03	P2	22.94	1506	5419	367	0.32763	2.52365	1489	2347	8270	4434	0	0.0221886	C3	Sertoli cells	9936	0.600726
P2#alignments.possorted.tagged_BC01920_N02	P2	15.75	1209	4745	322	0.286915	2.78791	1428	2183	8269	4658	0.0666667	0.0194703	C6	Stroma	8414	0.508768
P2#alignments.possorted.tagged_BC01024_N01	P2	20.651	1387	5031	306	0.304245	3.14021	2031	1997	8268	4240	0.4	0.0185051	C5	PTM	9523	0.575895
P2#alignments.possorted.tagged_BC03443_N03	P2	21.389	1577	5563	374	0.336418	3.875	1584	1696	8268	4988	0.233333	0.0226173	C6	Stroma	8917	0.539248
P2#alignments.possorted.tagged_BC04654_N04	P2	24.967	1513	5333	355	0.322508	3.54286	1484	1820	8268	4964	0.233333	0.0214683	C3	Sertoli cells	9486	0.573657
P2#alignments.possorted.tagged_BC01911_N02	P2	15.829	1223	4788	321	0.289585	4.05318	1898	1636	8267	4733	0.0666667	0.0194145	C6	Stroma	9043	0.546934
P2#alignments.possorted.tagged_BC01063_N01	P2	17.516	1318	5014	363	0.303291	3.73696	1863	1745	8266	4658	0.4	0.0219574	C6	Stroma	9059	0.547968
P2#alignments.possorted.tagged_BC01090_N01	P2	18.177	1331	4952	373	0.299685	4.04396	1986	1638	8262	4638	0.1	0.0225732	C6	Stroma	8855	0.535887
P2#alignments.possorted.tagged_BC01108_N01	P2	18.469	1427	5171	345	0.313015	3.92546	2252	1677	8260	4331	1	0.0208838	C6	Leydig cells	9353	0.566162
P2#alignments.possorted.tagged_BC02147_N02	P2	20.441	1631	6335	341	0.383567	2.51105	1335	2352	8258	4571	0.466667	0.0206466	C6	Stroma	10348	0.626544
P2#alignments.possorted.tagged_BC02278_N02	P2	17.874	1381	5531	352	0.334928	3.12026	1792	2004	8257	4461	0.6	0.0213152	C6	Stroma	9395	0.568911
P2#alignments.possorted.tagged_BC02578_N02	P2	26.589	1665	5637	367	0.341347	3.35956	1855	1894	8257	4508	0.366667	0.0222236	C6	Stroma	9417	0.570243
P2#alignments.possorted.tagged_BC01027_N01	P2	18.678	1330	5232	350	0.31686	3.55881	2043	1811	8256	4402	0.133333	0.0211967	C6	Stroma	9097	0.550933
P2#alignments.possorted.tagged_BC03581_N03	P2	18.978	1313	4711	350	0.285411	3.74856	1835	1738	8253	4680	0.533333	0.0212044	C5	PTM	9288	0.562704
P2#alignments.possorted.tagged_BC01058_N01	P2	15.336	1061	4141	299	0.25097	3.74138	2165	1740	8250	4345	0.0333333	0.0181212	C3	Sertoli cells	7882	0.477697
P2#alignments.possorted.tagged_BC01670_N02	P2	16.55	1262	4796	302	0.290667	4.62756	2264	1466	8250	4520	1.1	0.018303	C6	Stroma	8949	0.542364
P2#alignments.possorted.tagged_BC03442_N03	P2	21.132	1494	5656	372	0.342829	3.63948	1548	1778	8249	4923	0.1	0.0225482	C3	Sertoli cells	9835	0.596133
P2#alignments.possorted.tagged_BC03105_N02	P2	17.658	1400	5017	366	0.304319	4.69661	2163	1447	8243	4633	0.366667	0.0222007	C5	PTM	9358	0.567633
P2#alignments.possorted.tagged_BC03783_N03	P2	18.129	1181	4529	297	0.274718	3.42458	1604	1863	8243	4776	0.133333	0.0180153	C5	PTM	8834	0.535849
P2#alignments.possorted.tagged_BC01083_N01	P2	17.279	1274	4661	384	0.282759	3.43595	1378	1858	8242	5006	3	0.0232953	C9	Endothelial cells	8318	0.504611
P2#alignments.possorted.tagged_BC00970_N01	P2	33.618	2207	7047	404	0.427557	1.36335	378	3487	8241	4376	0.6	0.0245116	C3	Sertoli cells	11190	0.678922
P2#alignments.possorted.tagged_BC02515_N02	P2	24.851	1644	5638	321	0.34207	3.36263	1683	1889	8241	4669	3.26667	0.0194758	C6	Stroma	10009	0.607269
P2#alignments.possorted.tagged_BC02994_N02	P2	19.677	1421	5181	341	0.314381	4.39267	2047	1528	8240	4665	0.0333333	0.0206917	C5	PTM	9836	0.596845
P2#alignments.possorted.tagged_BC04604_N04	P2	18.757	1544	6074	358	0.368568	2.80074	1657	2168	8240	4415	2	0.0217233	C6	Stroma	10357	0.628459
P2#alignments.possorted.tagged_BC02757_N02	P2	19.973	1281	5083	341	0.308472	3.1319	1923	1994	8239	4322	1.53333	0.0206943	C5	PTM	9784	0.593761
P2#alignments.possorted.tagged_BC02080_N03	P2	21.833	1290	4949	296	0.300376	4.03853	1792	1635	8238	4811	0.633333	0.0179655	C5	PTM	9576	0.581209
P2#alignments.possorted.tagged_BC02363_N02	P2	21.263	1310	4755	319	0.288812	3.61176	1810	1785	8232	4637	1	0.0193756	C6	Stroma	8296	0.503887
P2#alignments.possorted.tagged_BC02931_N02	P2	25.525	1289	4813	319	0.292335	3.46179	1856	1845	8232	4531	1.83333	0.0193756	C5	PTM	9823	0.596635
P2#alignments.possorted.tagged_BC00917_N01	P2	19.521	1390	4578	329	0.278095	1.30302	105	3574	8231	4552	2.86667	0.0199854	C8	Macrophages	7622	0.463006
P2#alignments.possorted.tagged_BC02090_N02	P2	23.472	1375	5076	316	0.308384	3.66289	2118	1765	8230	4347	0.7	0.0191981	C5	PTM	9822	0.596719
P2#alignments.possorted.tagged_BC02500_N02	P2	21.07	1479	5494	385	0.333779	4.00304	1734	1645	8230	4851	2.36667	0.02339	C6	Stroma	9595	0.582928
P2#alignments.possorted.tagged_BC01145_N01	P2	15.961	1201	4585	342	0.27869	4.41184	2324	1520	8226	4382	0.9	0.0207877	C5	PTM	9069	0.55124
P2#alignments.possorted.tagged_BC03546_N03	P2	19.142	1421	5130	317	0.311968	3.16093	1390	1976	8222	4856	2.86667	0.0192775	C5	PTM	9333	0.567563
P2#alignments.possorted.tagged_BC02483_N02	P2	18.273	1255	4732	358	0.28794	4.49265	1915	1496	8217	4806	0.3	0.0217841	C6	Stroma	8447	0.513995
P2#alignments.possorted.tagged_BC01088_N01	P2	18.066	1478	5286	297	0.321689	3.8673	2124	1688	8216	4404	0.7	0.0180745	C6	Stroma	9052	0.550876
P2#alignments.possorted.tagged_BC03613_N03	P2	22.277	1440	5342	390	0.325097	3.26584	1517	1926	8216	4773	1.3	0.0237342	C5	PTM	9934	0.604552
P2#alignments.possorted.tagged_BC02026_N02	P2	17.277	1300	5178	298	0.315155	2.89891	1968	2107	8215	4140	1.83333	0.0181376	C6	Stroma	9019	0.548935
P2#alignments.possorted.tagged_BC03635_N03	P2	20.868	1370	4936	365	0.300426	3.45499	1288	1844	8215	5083	0.133333	0.0222155	C6	Stroma	9220	0.561169
P2#alignments.possorted.tagged_BC01114_N01	P2	17.945	1169	4595	394	0.279739	3.56531	1889	1799	8213	4525	0.0666667	0.0239864	C6	Stroma	9239	0.562462
P2#alignments.possorted.tagged_BC02489_N02	P2	19.426	1344	4808	296	0.292707	4.00793	1979	1640	8213	4594	0.566667	0.0180202	C5	Stroma	9115	0.554913
P2#alignments.possorted.tagged_BC05412_N04	P2	25.774	1627	5761	323	0.350724	2.77609	1493	2175	8213	4545	1.53333	0.0196639	C5	PTM	10217	0.622002
P2#alignments.possorted.tagged_BC01093_N01	P2	20.372	1358	4875	311	0.296822	3.70872	1828	1744	8212	4640	0.633333	0.0189357	C6	Stroma	8965	0.545848
P2#alignments.possorted.tagged_BC01101_N01	P2	18.364	1354	5270	317	0.320872	3.6792	1871	1755	8212	4586	0.2	0.019301	C6	Stroma	8888	0.541159
P2#alignments.possorted.tagged_BC01148_N01	P2	22.497	1636	5927	430	0.361006	3.74783	1950	1729	8209	4530	0.8	0.0261908	C6	Stroma	9241	0.562858
P2#alignments.possorted.tagged_BC02565_N02	P2	18.941	1540	5818	374	0.35441	3.65042	1964	1765	8208	4479	3.66667	0.0227827	C6	Stroma	9490	0.578095
P2#alignments.possorted.tagged_BC01111_N01	P2	20.721	1308	5059	392	0.308213	4.20749	2155	1576	8207	4476	0	0.0238821	C3	Sertoli cells	9189	0.559827
P2#alignments.possorted.tagged_BC01520_N02	P2	21.225	1447	5380	382	0.327809	4.58231	2120	1470	8206	4616	0.0333333	0.0232757	C3	Sertoli cells	9358	0.570193
P2#alignments.possorted.tagged_BC02646_N02	P2	19.704	1413	5090	329	0.310177	3.71823	1715	1739	8205	4751	2.06667	0.0200488	C6	Stroma	9160	0.558196
P2#alignments.possorted.tagged_BC02215_N02	P2	16.178	1201	4674	316	0.284965	3.34605	2037	1887	8201	4277	0.0333333	0.0192659	C5	PTM	9618	0.586392
P2#alignments.possorted.tagged_BC01117_N01	P2	19.853	1163	4329	268	0.264028	3.59015	1904	1786	8198	4508	0.166667	0.0163455	C5	PTM	9121	0.556294
P2#alignments.possorted.tagged_BC01688_N02	P2	22.363	1502	5773	371	0.352141	3.51625	1660	1815	8197	4722	0.633333	0.0226302	C6	Stroma	9887	0.603086
P2#alignments.possorted.tagged_BC01458_N02	P2	20.094	1512	5490	305	0.335042	3.6054	2149	1779	8193	4265	4.83333	0.0186135	C8	Macrophages	9691	0.59142
P2#alignments.possorted.tagged_BC03761_N03	P2	20.498	1532	5400	364	0.32963	3.84962	1736	1689	8191	4766	4.26667	0.0222195	C6	Stroma	9580	0.584788
P2#alignments.possorted.tagged_BC01950_N02	P2	21.769	1594	5970	368	0.364469	2.241	1235	2527	8190	4428	5.13333	0.0224664	C6	Stroma	9907	0.604823
P2#alignments.possorted.tagged_BC01758_N02	P2	19.442	1404	5339	351	0.326066	4.1523	2029	1589	8187	4569	0.5	0.0214364	C5	PTM	9479	0.578906
P2#alignments.possorted.tagged_BC01066_N01	P2	19.36	1271	5066	325	0.309469	3.16964	2016	1963	8185	4206	0.5	0.0198534	C6	Stroma	8807	0.537996
P2#alignments.possorted.tagged_BC02313_N02	P2	23.927	1160	4248	329	0.259499	2.75976	1513	2177	8185	4495	0	0.0200977	C3	Sertoli cells	7655	0.467624
P2#alignments.possorted.tagged_BC01162_N01	P2	17.543	1258	4739	361	0.289599	4.46195	2146	1498	8182	4538	0.0666667	0.0220606	C3	Sertoli cells	9039	0.552371
P2#alignments.possorted.tagged_BC03465_N03	P2	22.067	1315	5037	330	0.307847	3.62203	1958	1770	8181	4453	1.96667	0.0201687	C6	Stroma	9459	0.578108
P2#alignments.possorted.tagged_BC01116_N01	P2	18.559	1359	4941	378	0.302017	3.93068	2205	1659	8180	4316	1	0.0231051	C5	PTM	9267	0.566443
P2#alignments.possorted.tagged_BC01124_N01	P2	21.655	1192	4500	332	0.275061	3.70656	2153	1738	8180	4289	0.7	0.0202934	C5	PTM	8923	0.545416
P2#alignments.possorted.tagged_BC02393_N02	P2	21.268	1407	5150	417	0.314831	4.80071	2005	1410	8179	4764	0	0.0254921	C3	Sertoli cells	9004	0.550434
P2#alignments.possorted.tagged_BC03835_N04	P2	19.964	1603	5795	408	0.354434	3.27116	929	1914	8175	5332	0.9	0.0249541	C8	Macrophages	8452	0.516942
P2#alignments.possorted.tagged_BC04758_N04	P2	29.089	1895	6377	403	0.390031	2.81653	637	2142	8175	5396	0.466667	0.0246483	C3	Sertoli cells	10518	0.643303
P2#alignments.possorted.tagged_BC02418_N03	P2	19.981	1342	4829	332	0.295496	3.79519	1707	1704	8171	4760	0.166667	0.0203158	C6	Stroma	9069	0.55495
P2#alignments.possorted.tagged_BC01892_N02	P2	21.35	1283	4870	318	0.298188	3.86361	1817	1679	8166	4670	0.866667	0.019471	C6	Stroma	8999	0.551004
P2#alignments.possorted.tagged_BC01172_N01	P2	16.618	1284	4905	300	0.300551	4.62371	2291	1451	8160	4418	0.166667	0.0183824	C5	PTM	8990	0.550858
P2#alignments.possorted.tagged_BC03124_N02	P2	22.032	1502	5571	307	0.34136	3.89502	1903	1667	8160	4590	0.4	0.0188113	C6	Stroma	9383	0.574939
P2#alignments.possorted.tagged_BC02718_N03	P2	29.923	1632	5810	353	0.356179	3.07393	1136	2002	8156	5018	0.0333333	0.0216405	C3	Sertoli cells	9997	0.612862
P2#alignments.possorted.tagged_BC02933_N03	P2	19.419	1471	5451	386	0.334171	3.27687	1977	1907	8156	4272	0.6	0.0236636	C5	PTM	9780	0.599559
P2#alignments.possorted.tagged_BC03002_N02	P2	19.307	1560	5677	359	0.348026	2.9306	1636	2075	8156	4445	1.53333	0.0220083	C6	Stroma	9765	0.598639
P2#alignments.possorted.tagged_BC03285_N03	P2	23.71	1365	4944	356	0.303127	3.36563	1795	1868	8155	4492	0.0666667	0.0218271	C5	PTM	9707	0.595156
P2#alignments.possorted.tagged_BC02050_N02	P2	20.545	1328	4842	318	0.296982	4.31075	2287	1535	8152	4330	0.4	0.0195044	C6	Stroma	9149	0.561151
P2#alignments.possorted.tagged_BC04515_N03	P2	25.458	1787	6400	418	0.39259	3.19506	1593	1943	8151	4615	2.03333	0.025641	C6	Stroma	10019	0.614587
P2#alignments.possorted.tagged_BC01115_N01	P2	21.296	1183	4455	349	0.273313	3.7633	2072	1711	8150	4367	0.0666667	0.021411	C5	PTM	8774	0.538282
P2#alignments.possorted.tagged_BC01113_N01	P2	20.929	1226	4654	315	0.285697	4.28896	1948	1540	8145	4657	0.7	0.019337	C6	Stroma	8818	0.541314
P2#alignments.possorted.tagged_BC01137_N01	P2	14.173	1181	4746	349	0.291344	4.0653	2147	1608	8145	4390	0.0666667	0.0214242	C6	Stroma	8885	0.545427
P2#alignments.possorted.tagged_BC02858_N02	P2	20.411	1340	5035	358	0.309085	3.8367	2116	1684	8145	4345	0.166667	0.0219767	C5	PTM	9498	0.583057
P2#alignments.possorted.tagged_BC03728_N03	P2	24.5	1794	6304	369	0.386986	3.18551	1564	1946	8145	4635	5.16667	0.0226519	C6	Stroma	10222	0.627502
P2#alignments.possorted.tagged_BC01026_N01	P2	16.946	1335	5268	345	0.323428	2.23431	1336	2518	8144	4290	0.166667	0.0211812	C7	Stroma	9416	0.578094
P2#alignments.possorted.tagged_BC03068_N02	P2	23.67	1542	5539	347	0.340066	3.53958	1770	1794	8144	4580	0.8	0.021304	C5	PTM	9454	0.580427
P2#alignments.possorted.tagged_BC03909_N03	P2	20.928	1543	5628	334	0.345785	2.98531	1541	2042	8138	4555	2.06667	0.020521	C6	Stroma	9734	0.598058
P2#alignments.possorted.tagged_BC02860_N02	P2	16.896	1186	4503	283	0.276733	3.55543	1609	1786	8136	4741	0.0333333	0.0173918	C6	Stroma	8758	0.538225
P2#alignments.possorted.tagged_BC01139_N01	P2	24.503	1423	5083	361	0.312415	3.96642	1936	1638	8135	4561	0.0666667	0.0221881	C3	Sertoli cells	9140	0.56177
P2#alignments.possorted.tagged_BC01140_N01	P2	18.462	1529	5283	440	0.324708	4.11957	2233	1589	8135	4313	1.36667	0.0270436	C8	Macrophages	8291	0.509588
P2#alignments.possorted.tagged_BC04105_N03	P2	23.539	1688	6405	429	0.393718	3.01481	1419	2026	8134	4689	2.23333	0.0263708	C6	Stroma	9828	0.604131
P2#alignments.possorted.tagged_BC02916_N02	P2	21.602	1200	4559	291	0.280278	4.04842	2162	1611	8133	4360	0.333333	0.0178901	C5	PTM	9279	0.570454
P2#alignments.possorted.tagged_BC01129_N01	P2	15.869	1154	4520	294	0.277914	3.94647	2139	1644	8132	4349	0.133333	0.0180767	C5	PTM	8845	0.543839
P2#alignments.possorted.tagged_BC03998_N04	P2	22.517	1501	5666	339	0.348377	3.7695	1628	1705	8132	4799	0.233333	0.0208436	C3	Sertoli cells	9471	0.582329
P2#alignments.possorted.tagged_BC01154_N01	P2	21.057	1393	5154	288	0.316935	3.73834	1856	1716	8131	4559	0.866667	0.01771	C6	Stroma	9030	0.555282
P2#alignments.possorted.tagged_BC03439_N03	P2	25.219	1783	6152	345	0.378352	2.79907	1626	2140	8130	4364	3.83333	0.0212177	C5	PTM	10253	0.630566
P2#alignments.possorted.tagged_BC05056_N05	P2	33.845	1863	6128	374	0.376922	1.43675	120	3336	8129	4673	0.166667	0.0230041	C3	Sertoli cells	10606	0.652356
P2#alignments.possorted.tagged_BC02838_N02	P2	18.487	1251	4502	336	0.276944	3.78118	1934	1700	8128	4494	0.133333	0.0206693	C5	PTM	9178	0.564592
P2#alignments.possorted.tagged_BC01087_N01	P2	17.122	1150	4466	324	0.274763	3.65998	1773	1744	8127	4610	0.1	0.0199336	C6	Stroma	8544	0.525655
P2#alignments.possorted.tagged_BC01076_N01	P2	22.719	1480	5407	339	0.332698	3.23229	1702	1920	8126	4504	0.8	0.020859	C6	Stroma	9102	0.560054
P2#alignments.possorted.tagged_BC01379_N02	P2	21.951	1430	5229	282	0.321943	2.91562	1900	2074	8121	4147	1.23333	0.0173624	C5	PTM	9932	0.611501
P2#alignments.possorted.tagged_BC01934_N02	P2	23.242	1608	5562	352	0.342446	3.14548	1707	1959	8121	4455	1.96667	0.0216722	C6	Stroma	9505	0.585211
P2#alignments.possorted.tagged_BC01062_N01	P2	24.459	1544	5499	378	0.33865	3.51306	1930	1799	8119	4390	0.5	0.0232787	C6	Stroma	9222	0.567927
P2#alignments.possorted.tagged_BC01146_N01	P2	20.488	1314	4863	334	0.299483	3.73964	2064	1713	8119	4342	0.433333	0.020569	C5	PTM	9439	0.581291
P2#alignments.possorted.tagged_BC02882_N02	P2	20.807	1408	5394	320	0.332266	3.70551	1842	1725	8117	4550	0.9	0.0197117	C6	Stroma	8783	0.541025
P2#alignments.possorted.tagged_BC01131_N01	P2	15.934	1207	4594	364	0.283196	3.60329	2113	1762	8111	4236	0.333333	0.0224387	C6	Stroma	8541	0.526507
P2#alignments.possorted.tagged_BC01097_N01	P2	21.914	1162	4344	355	0.268016	2.92826	1674	2063	8104	4367	0.0333333	0.0219028	C5	PTM	8885	0.548186
P2#alignments.possorted.tagged_BC03330_N03	P2	20.326	1396	5002	323	0.308613	3.5299	1732	1789	8104	4583	2.53333	0.0199284	C5	Stroma	9221	0.568917
P2#alignments.possorted.tagged_BC03965_N03	P2	25.098	1597	5631	383	0.34755	3.40991	1649	1837	8101	4615	1.66667	0.0236391	C6	Stroma	9921	0.612332
P2#alignments.possorted.tagged_BC01094_N01	P2	25.048	1442	5174	369	0.319501	3.68576	1791	1728	8097	4578	1.9	0.0227862	C5	PTM	9442	0.583055
P2#alignments.possorted.tagged_BC02118_N02	P2	21.087	1395	5033	369	0.310833	3.85372	1885	1668	8096	4543	0.666667	0.022789	C5	PTM	9348	0.577322
P2#alignments.possorted.tagged_BC02850_N02	P2	21.095	1534	5591	365	0.345337	3.23379	1486	1912	8095	4697	0.933333	0.0225448	C5	PTM	9713	0.599938
P2#alignments.possorted.tagged_BC03179_N02	P2	24.296	1595	5512	325	0.340457	3.05968	1439	1994	8095	4662	0.7	0.0200741	C5	PTM	9798	0.605188
P2#alignments.possorted.tagged_BC02852_N02	P2	26.333	1383	4842	357	0.299147	3.39837	1824	1840	8093	4429	2.1	0.0220561	C5	PTM	9453	0.584023
P2#alignments.possorted.tagged_BC03758_N03	P2	28.055	1771	6291	358	0.388669	3.11021	1207	1969	8093	4917	2.3	0.0221179	C6	Stroma	9994	0.617447
P2#alignments.possorted.tagged_BC01119_N01	P2	16.072	1534	5619	365	0.347281	2.89129	1683	2079	8090	4328	0.933333	0.0225587	C5	PTM	9986	0.617182
P2#alignments.possorted.tagged_BC04839_N04	P2	24.678	1483	5092	343	0.314748	2.70715	357	2182	8089	5550	0.566667	0.0212016	C4	Leydig cells	9689	0.5989
P2#alignments.possorted.tagged_BC01180_N01	P2	19.253	1332	4883	331	0.301904	4.01675	2157	1612	8087	4318	0.466667	0.0204649	C5	PTM	8997	0.556263
P2#alignments.possorted.tagged_BC02494_N02	P2	22.625	1691	6223	394	0.384753	2.41512	1701	2368	8087	4018	2.46667	0.0243601	C3	Innate lymph	9998	0.618153
P2#alignments.possorted.tagged_BC03687_N03	P2	22.359	1513	5412	362	0.334694	2.83175	1099	2110	8085	4876	0	0.0223871	C3	Sertoli cells	9854	0.6094
P2#alignments.possorted.tagged_BC01132_N01	P2	16.09	1487	5440	332	0.336467	3.0664	1655	1988	8084	4441	1.73333	0.0205344	C5	PTM	9397	0.58121
P2#alignments.possorted.tagged_BC02426_N02	P2	20.755	1394	5208	356	0.322118	3.97783	1822	1624	8084	4638	4.06667	0.0220188	C5	PTM	9515	0.588508
P2#alignments.possorted.tagged_BC02316_N02	P2	21.299	1323	4847	304	0.299827	3.4806	2017	1804	8083	4262	0.1	0.0188049	C5	PTM	9461	0.585241
P2#alignments.possorted.tagged_BC03778_N03	P2	24.194	1344	4973	323	0.307659	3.26266	1597	1896	8082	4589	0.533333	0.0199827	C6	Stroma	8999	0.556731
P2#alignments.possorted.tagged_BC01120_N01	P2	11.082	666	2815	462	0.174282	4.87345	1785	1375	8076	4916	0	0.0286033	C2	Germ cells	6040	0.373947
P2#alignments.possorted.tagged_BC02493_N02	P2	19.759	1387	5008	329	0.310131	3.97781	1976	1622	8074	4476	4.4	0.020374	C6	Stroma	9198	0.569606
P2#alignments.possorted.tagged_BC03651_N03	P2	18.979	1361	5231	403	0.323941	2.84843	1617	2098	8074	4359	0.5	0.0249567	C5	PTM	9694	0.600322
P2#alignments.possorted.tagged_BC01923_N02	P2	15.59	1299	5030	283	0.311764	3.3371	1176	1860	8067	5031	0.233333	0.0175406	C4	Leydig cells	9231	0.572146
P2#alignments.possorted.tagged_BC01153_N01	P2	19.774	1418	5141	336	0.318683	4.0444	2114	1599	8066	4353	0.166667	0.0208282	C5	PTM	9445	0.585482
P2#alignments.possorted.tagged_BC03346_N03	P2	19.165	1113	4106	316	0.254525	4.19382	1714	1553	8066	4799	0.0333333	0.0195884	C5	PTM	8484	0.525911
P2#alignments.possorted.tagged_BC02160_N02	P2	21.664	1466	5555	409	0.344389	3.29446	2100	1878	8065	4087	1.06667	0.0253565	C6	Stroma	9299	0.576503
P2#alignments.possorted.tagged_BC01163_N01	P2	18.894	1145	4461	370	0.276703	4.06981	2125	1590	8061	4346	0.8	0.02295	C6	Stroma	8505	0.52754
P2#alignments.possorted.tagged_BC02561_N02	P2	22.046	1336	5100	310	0.316338	3.77265	2107	1689	8061	4265	1.2	0.0192284	C5	PTM	9323	0.578278
P2#alignments.possorted.tagged_BC02754_N02	P2	16.363	1256	4966	328	0.308065	3.85542	1826	1660	8060	4574	0.2	0.0203474	C5	PTM	9524	0.590819
P2#alignments.possorted.tagged_BC03563_N03	P2	17.059	1163	4464	290	0.276992	4.21216	1611	1546	8058	4901	0.1	0.0179945	C4	Leydig cells	8791	0.545483
P2#alignments.possorted.tagged_BC02455_N02	P2	22.678	1443	5412	414	0.335857	3.68703	1922	1719	8057	4416	0.366667	0.0256919	C6	Stroma	9294	0.576766
P2#alignments.possorted.tagged_BC02665_N03	P2	20.265	1402	5010	302	0.31091	3.99814	1893	1612	8057	4552	1.73333	0.0187415	C5	PTM	9627	0.597431
P2#alignments.possorted.tagged_BC03789_N04	P2	22.877	1525	5143	352	0.319243	3.04977	807	1989	8055	5259	0.533333	0.0218498	C5	PTM	9694	0.601738
P2#alignments.possorted.tagged_BC01126_N01	P2	16.907	1127	4366	276	0.271045	3.82275	2141	1670	8054	4243	0.0666667	0.0171343	C6	Stroma	8283	0.514217
P2#alignments.possorted.tagged_BC02814_N02	P2	22.016	1412	5309	317	0.32967	3.64628	2029	1733	8052	4290	0.9	0.0196846	C5	PTM	9436	0.585941
P2#alignments.possorted.tagged_BC02104_N02	P2	18.538	1217	4753	336	0.295181	3.93624	1926	1631	8051	4494	1.23333	0.020867	C6	Stroma	9058	0.562539
P2#alignments.possorted.tagged_BC01182_N01	P2	19.18	1327	4927	355	0.306139	3.75872	1925	1691	8047	4431	0.0666667	0.0220579	C3	Sertoli cells	8958	0.556605
P2#alignments.possorted.tagged_BC05339_N05	P2	30.227	1847	6027	329	0.374534	2.25354	289	2473	8046	5284	3.4	0.0204449	C6	Stroma	10342	0.64268
P2#alignments.possorted.tagged_BC03200_N02	P2	16.998	1279	4798	320	0.298198	4.59847	2240	1437	8045	4368	1	0.0198881	C6	Stroma	8673	0.53903
P2#alignments.possorted.tagged_BC02461_N03	P2	26.169	1718	6193	377	0.384993	3.65182	1584	1729	8043	4730	4	0.0234365	C6	Stroma	9974	0.620042
P2#alignments.possorted.tagged_BC03049_N03	P2	22.305	1408	5043	347	0.313502	4.44181	1641	1478	8043	4924	0.833333	0.0215716	C6	Stroma	9114	0.56658
P2#alignments.possorted.tagged_BC01627_N02	P2	18.205	1425	5419	339	0.336919	3.47524	1920	1797	8042	4325	1.63333	0.0210768	C6	Stroma	9417	0.585489
P2#alignments.possorted.tagged_BC02784_N02	P2	19.934	1510	5692	334	0.353892	3.66473	2061	1724	8042	4257	0.733333	0.020766	C6	Stroma	9618	0.597986
P2#alignments.possorted.tagged_BC01161_N01	P2	23.525	1485	5353	405	0.332857	4.22822	2186	1538	8041	4317	3	0.0251834	C6	Stroma	9183	0.571011
P2#alignments.possorted.tagged_BC02837_N03	P2	14.781	836	3232	546	0.20097	3.08795	2005	1967	8041	4069	0.166667	0.033951	C1	Neutrophils	5360	0.333292
P2#alignments.possorted.tagged_BC02958_N02	P2	20.872	1444	5440	302	0.338266	3.90604	2111	1639	8041	4291	0.6	0.0187788	C6	Stroma	9282	0.577167
P2#alignments.possorted.tagged_BC03916_N03	P2	19.76	1407	5356	287	0.333085	2.85982	1360	2083	8040	4597	0.3	0.0178483	C5	PTM	9970	0.620025
P2#alignments.possorted.tagged_BC01096_N01	P2	20.046	1316	4924	375	0.306257	3.58847	1898	1752	8039	4389	0.3	0.0233238	C6	Stroma	8948	0.556537
P2#alignments.possorted.tagged_BC02510_N02	P2	22.896	1665	5832	360	0.362822	3.35374	1142	1846	8037	5049	2.76667	0.0223964	C6	Stroma	9689	0.602775
P2#alignments.possorted.tagged_BC01174_N01	P2	20.201	1316	5126	329	0.31894	3.63437	1665	1734	8036	4637	1.06667	0.0204704	C6	Stroma	8936	0.555998
P2#alignments.possorted.tagged_BC02237_N02	P2	20.408	1381	5357	318	0.333354	3.66067	2069	1724	8035	4242	0.766667	0.0197884	C6	Stroma	9064	0.564032
P2#alignments.possorted.tagged_BC03171_N03	P2	18.178	1276	4762	314	0.296329	4.07901	1848	1582	8035	4605	1.7	0.0195395	C5	PTM	9198	0.572371
P2#alignments.possorted.tagged_BC01149_N01	P2	20.748	1404	5061	314	0.315013	4.03006	2252	1597	8033	4184	0.133333	0.0195444	C5	PTM	9090	0.565791
P2#alignments.possorted.tagged_BC02369_N02	P2	23.523	1378	5035	352	0.313434	3.32759	1776	1856	8032	4400	2.23333	0.0219124	C6	Stroma	9236	0.57495
P2#alignments.possorted.tagged_BC01150_N01	P2	18.341	1343	4881	347	0.304074	4.02253	2194	1598	8026	4234	0.866667	0.0216172	C6	Stroma	8993	0.560242
P2#alignments.possorted.tagged_BC02853_N02	P2	24.227	1774	6358	407	0.396137	3.10696	1819	1954	8025	4252	2.73333	0.0253583	C8	Neutrophils	9567	0.596075
P2#alignments.possorted.tagged_BC02423_N02	P2	20.372	1502	5579	390	0.347645	3.95921	1654	1618	8024	4752	1.06667	0.0243021	C6	Stroma	9617	0.599265
P2#alignments.possorted.tagged_BC02760_N02	P2	21.302	1420	5132	335	0.31995	4.47067	1982	1466	8020	4572	0.766667	0.0208853	C6	Stroma	9154	0.570698
P2#alignments.possorted.tagged_BC03398_N03	P2	21.584	1526	5664	355	0.353117	3.63316	1805	1731	8020	4484	0.8	0.0221322	C7	Stroma	9625	0.600062
P2#alignments.possorted.tagged_BC04451_N04	P2	24.403	1713	6293	395	0.392478	2.75152	1092	2137	8017	4788	2.96667	0.0246352	C6	Stroma	10154	0.633279
P2#alignments.possorted.tagged_BC02180_N02	P2	22	1311	5059	291	0.315556	3.8202	2094	1663	8016	4259	2.36667	0.0181512	C5	PTM	9410	0.586951
P2#alignments.possorted.tagged_BC01571_N02	P2	15.259	917	3548	300	0.22139	2.73392	1518	2146	8013	4349	0	0.0187196	C6	Stroma	6927	0.432235
P2#alignments.possorted.tagged_BC02972_N02	P2	23.047	1385	5065	365	0.316128	4.36212	1928	1494	8011	4589	0.133333	0.0227812	C6	Stroma	9127	0.569654
P2#alignments.possorted.tagged_BC03016_N02	P2	27.132	1699	6215	427	0.388146	3.25851	1522	1880	8006	4604	0.633333	0.0266675	C6	Stroma	9923	0.619723
P2#alignments.possorted.tagged_BC03116_N02	P2	15.942	1272	4799	348	0.299825	4.13013	1903	1560	8003	4540	1.4	0.0217418	C5	PTM	9607	0.600212
P2#alignments.possorted.tagged_BC03006_N02	P2	20.691	1233	4649	358	0.290563	3.92308	1986	1625	8000	4389	0.333333	0.022375	C5	PTM	8546	0.534125
P2#alignments.possorted.tagged_BC03245_N03	P2	25.774	1627	5810	346	0.363216	2.74263	1341	2137	7998	4520	2.4	0.0216304	C5	PTM	10063	0.629095
P2#alignments.possorted.tagged_BC01134_N01	P2	22.519	1558	5747	383	0.359367	2.78419	1477	2113	7996	4406	0.9	0.0239495	C6	Stroma	9787	0.611993
P2#alignments.possorted.tagged_BC01845_N02	P2	21.383	1339	5037	362	0.31497	3.64884	1838	1720	7996	4438	0.233333	0.0226363	C5	PTM	9206	0.575663
P2#alignments.possorted.tagged_BC02647_N02	P2	25.479	1351	4761	320	0.297711	3.3694	1910	1830	7996	4256	0.566667	0.02001	C5	PTM	9398	0.587669
P2#alignments.possorted.tagged_BC01192_N01	P2	17.541	1311	4865	309	0.304329	4.12372	2046	1560	7993	4387	0.4	0.0193294	C5	PTM	9270	0.579882
P2#alignments.possorted.tagged_BC02496_N02	P2	22.895	1399	4963	329	0.310459	3.42335	1944	1807	7993	4242	1.9	0.0205805	C6	Stroma	9147	0.572188
P2#alignments.possorted.tagged_BC04006_N04	P2	18.088	1361	5112	360	0.31986	3.46924	1393	1788	7991	4810	0.3	0.0225253	C6	Stroma	8985	0.562195
P2#alignments.possorted.tagged_BC03478_N03	P2	20.679	1462	5477	420	0.342741	3.61316	1371	1732	7990	4887	0.466667	0.0262829	C6	Stroma	9517	0.595557
P2#alignments.possorted.tagged_BC03513_N03	P2	18.964	1561	5646	319	0.353361	3.17835	1268	1912	7989	4809	5.5	0.019965	C6	Stroma	9702	0.60721
P2#alignments.possorted.tagged_BC02377_N02	P2	19.947	1380	5169	341	0.323548	3.71547	1568	1694	7988	4726	0.0333333	0.0213445	C3	Sertoli cells	9127	0.571294
P2#alignments.possorted.tagged_BC03029_N02	P2	21.905	1427	5258	346	0.329119	3.41814	1722	1808	7988	4458	1.56667	0.0216575	C6	Stroma	9375	0.586818
P2#alignments.possorted.tagged_BC03351_N03	P2	26.865	1723	6153	424	0.38514	2.89279	1068	2052	7988	4868	0.933333	0.0265398	C6	Stroma	9973	0.624249
P2#alignments.possorted.tagged_BC01158_N01	P2	21.455	1376	4706	310	0.294604	2.98553	1539	2004	7987	4444	0.666667	0.0194065	C5	PTM	9013	0.564229
P2#alignments.possorted.tagged_BC04754_N03	P2	22.547	1651	6069	337	0.380073	2.51254	1014	2273	7984	4697	3.76667	0.0211047	C5	PTM	10330	0.646919
P2#alignments.possorted.tagged_BC01138_N01	P2	17.323	1216	4834	349	0.302882	3.375	1934	1824	7980	4222	0.266667	0.0218672	C5	PTM	9229	0.578258
P2#alignments.possorted.tagged_BC01173_N01	P2	17.038	1239	4536	318	0.284353	4.03853	2006	1583	7976	4387	0.3	0.0199348	C5	PTM	8762	0.549273
P2#alignments.possorted.tagged_BC03392_N03	P2	24.95	1449	5128	351	0.321464	3.92954	1922	1618	7976	4436	4.16667	0.0220035	C6	PTM	9418	0.590396
P2#alignments.possorted.tagged_BC02384_N02	P2	18.137	1264	4470	335	0.280251	4.52285	1920	1444	7975	4611	0.1	0.0210031	C3	Sertoli cells	8357	0.52395
P2#alignments.possorted.tagged_BC02575_N02	P2	18.352	1316	5023	338	0.315001	4.92788	1987	1345	7973	4641	1.33333	0.0211965	C6	Stroma	8907	0.558573
P2#alignments.possorted.tagged_BC01994_N02	P2	28.482	1539	5589	342	0.350539	3.23817	1766	1881	7972	4325	0.5	0.0214501	C5	PTM	9711	0.609069
P2#alignments.possorted.tagged_BC02399_N02	P2	20.235	1216	4924	329	0.30887	3.35574	1614	1830	7971	4527	0.233333	0.0206373	C6	Stroma	8959	0.561975
P2#alignments.possorted.tagged_BC02823_N02	P2	22.591	1312	4742	307	0.297453	4.18608	2018	1537	7971	4416	0	0.0192573	C3	Sertoli cells	8689	0.545038
P2#alignments.possorted.tagged_BC01167_N01	P2	20.628	1323	5083	386	0.318963	3.95831	2075	1607	7968	4286	0.366667	0.0242219	C5	PTM	9036	0.567018
P2#alignments.possorted.tagged_BC04050_N03	P2	20.966	1387	5216	401	0.32735	2.90922	1134	2038	7967	4795	0.333333	0.0251663	C6	Stroma	9145	0.57393
P2#alignments.possorted.tagged_BC02906_N02	P2	18.482	1316	4804	359	0.301569	3.25708	1462	1871	7965	4632	0.333333	0.0225361	C6	Stroma	8786	0.551538
P2#alignments.possorted.tagged_BC02521_N02	P2	15.818	1334	5006	332	0.314329	3.84367	1734	1644	7963	4585	1.26667	0.0208464	C5	PTM	9252	0.580937
P2#alignments.possorted.tagged_BC03352_N03	P2	20.101	1411	5146	377	0.323119	4.00188	1420	1592	7963	4951	0.466667	0.023672	C6	Leydig cells	8965	0.562916
P2#alignments.possorted.tagged_BC03626_N04	P2	24.791	1590	5525	350	0.346917	2.90918	1096	2037	7963	4830	0.9	0.0219766	C6	Stroma	9657	0.606367
P2#alignments.possorted.tagged_BC05219_N04	P2	19.818	1271	4728	303	0.296873	2.86741	1019	2059	7963	4885	0.333333	0.0190255	C5	PTM	9268	0.581941
P2#alignments.possorted.tagged_BC02522_N02	P2	18.867	1372	4832	296	0.303479	2.07969	654	2585	7961	4722	0.233333	0.0185906	C4	Leydig cells	9371	0.588557
P2#alignments.possorted.tagged_BC01195_N01	P2	15.842	1120	4404	360	0.276703	3.81137	1874	1654	7958	4430	0.933333	0.0226187	C6	Stroma	8294	0.521111
P2#alignments.possorted.tagged_BC01214_N01	P2	15.899	1116	4221	301	0.265205	5.28594	2294	1266	7958	4398	0.0666667	0.0189118	C6	Stroma	8209	0.51577
P2#alignments.possorted.tagged_BC03091_N02	P2	17.03	1161	4675	311	0.29373	3.83475	1488	1646	7958	4824	0.833333	0.0195401	C6	Stroma	9511	0.597575
P2#alignments.possorted.tagged_BC02630_N02	P2	21.529	1359	4805	306	0.302049	3.57916	1811	1737	7954	4406	1.06667	0.0192356	C5	PTM	9260	0.582097
P2#alignments.possorted.tagged_BC01142_N01	P2	17.643	1283	4746	315	0.298378	3.91837	1955	1617	7953	4381	0.5	0.0198038	C5	PTM	8973	0.564127
P2#alignments.possorted.tagged_BC02970_N03	P2	21.594	1494	5627	321	0.353766	3.15517	1504	1914	7953	4535	2.56667	0.0201811	C6	Stroma	9522	0.598642
P2#alignments.possorted.tagged_BC01187_N01	P2	16.255	1141	4314	264	0.271287	3.50482	2029	1765	7951	4157	0.166667	0.0166017	C5	PTM	8688	0.546346
P2#alignments.possorted.tagged_BC04418_N03	P2	18.826	1369	4951	326	0.311423	4.55486	1783	1431	7949	4735	2.23333	0.0205057	C6	Stroma	9160	0.576173
P2#alignments.possorted.tagged_BC01208_N01	P2	20.675	1232	4857	345	0.305549	4.83554	2333	1362	7948	4253	0.0333333	0.0217036	C6	Stroma	8467	0.53265
P2#alignments.possorted.tagged_BC02066_N02	P2	20.406	1216	4571	330	0.287593	3.75868	1553	1670	7947	4724	0.133333	0.0207626	C6	Stroma	9189	0.578143
P2#alignments.possorted.tagged_BC01630_N02	P2	17.33	1199	4559	303	0.287018	3.22222	1807	1881	7942	4254	0.566667	0.0190758	C5	PTM	9335	0.587698
P2#alignments.possorted.tagged_BC02013_N02	P2	18.294	1201	4427	313	0.278813	4.14851	1690	1542	7939	4707	0.0333333	0.0197128	C3	Sertoli cells	8398	0.528908
P2#alignments.possorted.tagged_BC01123_N01	P2	16.737	1065	4028	296	0.253716	3.00505	1431	1982	7938	4525	0.1	0.0186445	C5	PTM	8558	0.539053
P2#alignments.possorted.tagged_BC02815_N02	P2	21.203	1392	5122	346	0.322625	3.38079	1911	1812	7938	4215	0.366667	0.0217939	C5	PTM	9369	0.590136
P2#alignments.possorted.tagged_BC01191_N01	P2	21.782	1474	5304	406	0.334216	4.20669	2008	1524	7935	4403	0.333333	0.0255829	C6	Stroma	8909	0.561374
P2#alignments.possorted.tagged_BC02547_N02	P2	21.882	1315	4721	330	0.29748	4.53733	2014	1433	7935	4488	0.366667	0.020794	C5	PTM	8939	0.563264
P2#alignments.possorted.tagged_BC03137_N04	P2	20.091	1461	5110	367	0.322032	2.74776	1194	2117	7934	4623	2.2	0.0231283	C6	Stroma	8376	0.527855
P2#alignments.possorted.tagged_BC03369_N02	P2	25.678	1582	5678	401	0.357872	3.17526	1176	1900	7933	4857	5.2	0.0252742	C8	Macrophages	9696	0.611118
P2#alignments.possorted.tagged_BC01081_N01	P2	21.393	1318	4826	388	0.304249	2.24376	1180	2445	7931	4306	2.86667	0.024461	C6	Stroma	8046	0.50725
P2#alignments.possorted.tagged_BC03175_N02	P2	16.758	1244	4667	354	0.294225	3.70124	1903	1687	7931	4341	0.566667	0.0223175	C5	PTM	8997	0.567205
P2#alignments.possorted.tagged_BC02620_N02	P2	22.772	1449	5453	365	0.343821	3.35954	2019	1819	7930	4092	0.0666667	0.0230139	C3	Sertoli cells	9295	0.586066
P2#alignments.possorted.tagged_BC02649_N02	P2	20.826	1525	5514	353	0.347711	3.52052	1673	1754	7929	4502	0.633333	0.0222601	C6	Stroma	9333	0.588536
P2#alignments.possorted.tagged_BC04951_N05	P2	22.03	1246	4569	298	0.288265	3.47235	1104	1772	7925	5049	0.733333	0.0188013	C6	Stroma	9428	0.594826
P2#alignments.possorted.tagged_BC02536_N02	P2	28.713	1508	5469	361	0.345091	3.47178	1887	1772	7924	4265	0.0333333	0.0227789	C3	Sertoli cells	9241	0.583102
P2#alignments.possorted.tagged_BC04180_N03	P2	20.738	1351	4967	311	0.313494	3.60849	1571	1719	7922	4632	5.03333	0.0196289	C5	PTM	9444	0.596062
P2#alignments.possorted.tagged_BC01596_N02	P2	18.605	1259	4593	378	0.289999	4.89211	1983	1344	7919	4592	0.766667	0.0238666	C6	Stroma	8362	0.527971
P2#alignments.possorted.tagged_BC02385_N02	P2	20.929	1448	5295	347	0.334323	3.64185	1969	1706	7919	4244	0.9	0.0219093	C5	PTM	9246	0.583786
P2#alignments.possorted.tagged_BC01953_N02	P2	17.734	1209	4546	335	0.287067	3.68244	1905	1691	7918	4322	0.133333	0.0211543	C6	Stroma	9285	0.586322
P2#alignments.possorted.tagged_BC01479_N02	P2	26.221	1589	5604	336	0.353967	3.57308	1599	1731	7916	4586	4.9	0.0212228	C6	Stroma	9279	0.586091
P2#alignments.possorted.tagged_BC01839_N02	P2	19.336	1328	5012	324	0.316694	3.53727	2045	1744	7913	4124	1.66667	0.0204726	C6	Stroma	8844	0.558827
P2#alignments.possorted.tagged_BC01203_N01	P2	21.704	1381	5075	348	0.320715	3.6596	2042	1698	7912	4172	0.4	0.0219919	C6	Stroma	8959	0.566165
P2#alignments.possorted.tagged_BC02689_N02	P2	21.882	1315	4771	404	0.301618	4.12905	2040	1542	7909	4327	1.3	0.0255405	C5	PTM	8737	0.552345
P2#alignments.possorted.tagged_BC03036_N03	P2	25.201	1629	6130	384	0.387533	2.63131	1668	2178	7909	4063	1.7	0.0242761	C6	Stroma	10095	0.638197
P2#alignments.possorted.tagged_BC04477_N04	P2	23.813	1407	5112	302	0.323176	3.62244	1566	1711	7909	4632	1.43333	0.0190922	C5	PTM	9383	0.593185
P2#alignments.possorted.tagged_BC01882_N02	P2	24.598	1590	5578	363	0.352681	3.05747	1732	1949	7908	4227	0.0666667	0.0229514	C3	Sertoli cells	9528	0.602428
P2#alignments.possorted.tagged_BC02987_N02	P2	20.94	1417	5381	332	0.340225	3.07209	1865	1942	7908	4101	1.1	0.0209914	C5	PTM	9516	0.601669
P2#alignments.possorted.tagged_BC03177_N03	P2	20.904	1404	5112	349	0.32334	3.34818	1768	1818	7905	4319	0.133333	0.0220746	C5	PTM	9468	0.598861
P2#alignments.possorted.tagged_BC05097_N04	P2	20.949	1534	5295	373	0.334915	3.22953	1269	1869	7905	4767	3.43333	0.0235927	C6	Stroma	9221	0.583238
P2#alignments.possorted.tagged_BC04096_N03	P2	21.796	1530	5527	342	0.349677	3.34469	1602	1819	7903	4482	0.533333	0.0216374	C6	Stroma	9358	0.592054
P2#alignments.possorted.tagged_BC01907_N02	P2	21.103	1492	5483	365	0.347113	3.2394	1781	1863	7898	4254	3.13333	0.0231071	C6	Stroma	9660	0.611547
P2#alignments.possorted.tagged_BC02723_N02	P2	23.167	1673	6098	336	0.386047	3.21902	2014	1872	7898	4012	1.16667	0.0212712	C6	Stroma	9878	0.625348
P2#alignments.possorted.tagged_BC03162_N03	P2	19.687	1372	5054	321	0.319954	3.82468	1606	1637	7898	4655	1.7	0.0203216	C6	Stroma	9080	0.574829
P2#alignments.possorted.tagged_BC01233_N01	P2	15.987	1098	4336	324	0.274535	3.7401	1904	1666	7897	4327	0.3	0.0205141	C5	PTM	8676	0.549323
P2#alignments.possorted.tagged_BC01380_N02	P2	18.768	1289	4671	298	0.295745	4.03314	1691	1569	7897	4637	0.733333	0.0188679	C6	Stroma	8755	0.554324
P2#alignments.possorted.tagged_BC02541_N03	P2	14.685	1105	4318	359	0.27343	4.09748	1916	1549	7896	4431	0.1	0.022733	C6	Stroma	9265	0.586689
P2#alignments.possorted.tagged_BC02710_N02	P2	19.216	1378	5061	328	0.320479	3.19331	1039	1883	7896	4974	0.733333	0.02077	C4	Leydig cells	9016	0.570922
P2#alignments.possorted.tagged_BC03307_N02	P2	34.773	2037	6820	383	0.431919	2.24897	1471	2430	7895	3994	3.8	0.0242559	C5	Stroma	10539	0.667448
P2#alignments.possorted.tagged_BC01168_N01	P2	20.539	1338	5000	368	0.316736	3.4568	1962	1771	7893	4160	0.4	0.0233118	C5	PTM	9016	0.571139
P2#alignments.possorted.tagged_BC02580_N02	P2	22.014	1423	5483	403	0.347421	3.2562	1990	1854	7891	4047	0.866667	0.0255354	C6	Stroma	8677	0.549804
P2#alignments.possorted.tagged_BC01185_N01	P2	24.851	1393	5203	327	0.329721	3.53448	1891	1740	7890	4259	1.53333	0.0207224	C6	Stroma	8393	0.531876
P2#alignments.possorted.tagged_BC02671_N02	P2	19.519	1311	4898	299	0.310393	3.51115	1865	1749	7890	4276	0.166667	0.018948	C5	PTM	9364	0.593409
P2#alignments.possorted.tagged_BC01207_N01	P2	20.152	1323	5044	357	0.319686	3.95229	1613	1593	7889	4683	0.5	0.0226264	C6	Stroma	9113	0.577576
P2#alignments.possorted.tagged_BC02856_N02	P2	19.252	1050	4031	302	0.255482	2.76743	813	2094	7889	4982	0.0666667	0.0191406	C4	Leydig cells	8182	0.51857
P2#alignments.possorted.tagged_BC01573_N03	P2	25.016	1377	5009	431	0.317588	3.314	2057	1828	7886	4001	0.533333	0.0273269	C5	PTM	8983	0.569554
P2#alignments.possorted.tagged_BC02332_N02	P2	19.446	1365	4991	365	0.316527	3.95849	1516	1590	7884	4778	0.266667	0.0231481	C6	Stroma	8778	0.556697
P2#alignments.possorted.tagged_BC04837_N05	P2	32.875	2042	6669	398	0.422999	1.94692	179	2675	7883	5029	1.83333	0.0252442	C6	Stroma	10569	0.670367
P2#alignments.possorted.tagged_BC03302_N02	P2	18.262	1328	5129	353	0.325362	4.58611	2345	1411	7882	4126	1.3	0.0223928	C6	Stroma	8632	0.547577
P2#alignments.possorted.tagged_BC02425_N02	P2	20.005	1283	4832	311	0.306599	3.53134	1623	1739	7880	4518	0.7	0.0197335	C6	Stroma	8730	0.553934
P2#alignments.possorted.tagged_BC03555_N03	P2	21.085	1331	4746	362	0.301142	3.41209	1577	1786	7880	4517	3.93333	0.0229695	C6	Stroma	9047	0.574048
P2#alignments.possorted.tagged_BC02861_N03	P2	19.497	1408	5147	357	0.326628	3.75785	1680	1656	7879	4543	0.933333	0.0226552	C6	Stroma	8670	0.550197
P2#alignments.possorted.tagged_BC03072_N02	P2	21.949	1319	4895	383	0.310715	3.81479	1676	1636	7877	4565	0.833333	0.0243113	C5	PTM	9311	0.591025
P2#alignments.possorted.tagged_BC02376_N02	P2	16.563	1447	5531	353	0.35113	3.40739	1783	1787	7876	4306	0.9	0.0224099	C6	Stroma	9445	0.599606
P2#alignments.possorted.tagged_BC03809_N03	P2	27.685	1454	5323	329	0.337925	3.5844	1610	1718	7876	4548	0.666667	0.0208862	C6	Stroma	9287	0.589576
P2#alignments.possorted.tagged_BC04870_N04	P2	23.079	1655	5766	332	0.366142	3.13333	692	1905	7874	5277	1.23333	0.021082	C6	Stroma	9447	0.599886
P2#alignments.possorted.tagged_BC04189_N03	P2	19.187	1124	3927	283	0.249397	1.7978	287	2814	7873	4772	0.1	0.0179728	C4	Leydig cells	8511	0.540518
P2#alignments.possorted.tagged_BC02872_N02	P2	22.894	1503	5397	338	0.342797	3.90467	1896	1605	7872	4371	0.1	0.0214685	C3	Sertoli cells	9141	0.580602
P2#alignments.possorted.tagged_BC01547_N02	P2	20.589	1674	6178	363	0.392453	3.37035	2074	1801	7871	3996	1.83333	0.0230593	C6	Stroma	9493	0.603036
P2#alignments.possorted.tagged_BC02319_N02	P2	22.231	1437	5148	344	0.327106	4.18379	2160	1518	7869	4191	0.733333	0.0218579	C6	Stroma	8911	0.566209
P2#alignments.possorted.tagged_BC03067_N02	P2	22.69	1375	4752	333	0.302021	3.59253	2035	1713	7867	4119	0.3	0.0211644	C5	PTM	8834	0.561459
P2#alignments.possorted.tagged_BC02562_N02	P2	17.452	1181	4571	330	0.290591	4.3467	2157	1471	7865	4237	0.2	0.020979	C5	PTM	8776	0.557915
P2#alignments.possorted.tagged_BC01783_N02	P2	20.726	1413	5281	345	0.335771	3.6505	1822	1691	7864	4351	1.3	0.0219354	C6	Stroma	8937	0.568222
P2#alignments.possorted.tagged_BC03097_N02	P2	21.707	1447	5261	323	0.334499	3.98037	2059	1579	7864	4226	0.166667	0.0205366	C6	Stroma	9269	0.589331
P2#alignments.possorted.tagged_BC03706_N03	P2	23.338	1320	4904	370	0.311801	3.57209	1544	1720	7864	4600	0	0.0235249	C3	Sertoli cells	8759	0.556905
P2#alignments.possorted.tagged_BC03842_N03	P2	21.946	1341	5032	317	0.319939	3.92732	1607	1596	7864	4661	0.9	0.0201551	C6	Stroma	9029	0.574072
P2#alignments.possorted.tagged_BC03075_N02	P2	17.993	1263	5178	330	0.329389	2.82482	1505	2055	7860	4300	0.666667	0.0209924	C6	Stroma	9250	0.588422
P2#alignments.possorted.tagged_BC02614_N02	P2	20.618	1541	5436	340	0.345846	3.75151	1773	1654	7859	4432	2	0.0216313	C8	Macrophages	8685	0.552551
P2#alignments.possorted.tagged_BC02559_N02	P2	21.964	1331	4779	263	0.304085	4.07295	2095	1549	7858	4214	2.26667	0.0167345	C5	PTM	9536	0.60677
P2#alignments.possorted.tagged_BC02573_N02	P2	18.768	1270	5001	355	0.318211	3.55536	1678	1725	7858	4455	2.06667	0.0225884	C6	Stroma	8883	0.56522
P2#alignments.possorted.tagged_BC05121_N04	P2	20.185	1580	5440	355	0.346144	3.02768	1047	1951	7858	4860	2.53333	0.0225884	C6	Stroma	9650	0.614024
P2#alignments.possorted.tagged_BC01560_N02	P2	21.646	1585	5548	365	0.353061	2.61075	539	2176	7857	5142	0.0333333	0.0232277	C3	Sertoli cells	10077	0.641275
P2#alignments.possorted.tagged_BC03942_N03	P2	18.195	1415	5142	331	0.327224	4.23103	1977	1502	7857	4378	0.533333	0.021064	C5	PTM	9476	0.603029
P2#alignments.possorted.tagged_BC02468_N02	P2	17.337	1322	5024	363	0.319878	3.55775	1815	1723	7853	4315	1.66667	0.0231122	C5	PTM	8888	0.565898
P2#alignments.possorted.tagged_BC01564_N02	P2	20.792	1449	5135	329	0.327153	3.85944	2142	1615	7848	4091	1.63333	0.0209608	C6	Stroma	9354	0.595948
P2#alignments.possorted.tagged_BC01007_N01	P2	14.901	903	3466	313	0.220849	1.82165	1279	2781	7847	3787	0.0666667	0.0199439	C5	PTM	6152	0.391997
P2#alignments.possorted.tagged_BC01253_N01	P2	20.477	1396	5205	328	0.331698	4.38504	2128	1457	7846	4261	0.533333	0.0209024	C6	Stroma	9106	0.580296
P2#alignments.possorted.tagged_BC03428_N03	P2	22.595	1723	5891	362	0.375414	3.6758	1505	1678	7846	4663	2.33333	0.0230691	C5	PTM	9805	0.624841
P2#alignments.possorted.tagged_BC02881_N03	P2	20.546	1380	4776	335	0.304475	3.56785	1521	1717	7843	4605	0.2	0.0213566	C5	PTM	9019	0.574971
P2#alignments.possorted.tagged_BC02796_N02	P2	20.265	1269	4714	359	0.300714	3.82933	1667	1623	7838	4548	0.533333	0.0229013	C5	PTM	8941	0.570362
P2#alignments.possorted.tagged_BC03519_N04	P2	17.621	1317	4821	305	0.30754	3.99236	1434	1570	7838	4834	1.16667	0.0194565	C6	Stroma	8831	0.563345
P2#alignments.possorted.tagged_BC05752_N05	P2	26.139	1716	6137	320	0.39154	2.60653	485	2173	7837	5179	1.96667	0.020416	C5	PTM	10313	0.657969
P2#alignments.possorted.tagged_BC03476_N03	P2	18.252	1189	4529	301	0.289024	3.53152	1239	1729	7835	4867	0.0333333	0.0192087	C6	Stroma	8463	0.540077
P2#alignments.possorted.tagged_BC04507_N03	P2	20.213	1378	5065	309	0.32327	3.53619	1538	1727	7834	4569	0.233333	0.0197217	C6	Stroma	8536	0.544805
P2#alignments.possorted.tagged_BC02901_N02	P2	19.621	1298	4924	342	0.314351	4.19708	2024	1507	7832	4301	0.0666667	0.0218335	C6	Stroma	9404	0.600358
P2#alignments.possorted.tagged_BC03150_N02	P2	21.16	1293	4724	340	0.301583	3.82266	1964	1624	7832	4244	0.333333	0.0217058	C6	Stroma	8626	0.550689
P2#alignments.possorted.tagged_BC01212_N01	P2	21.7	1315	4893	343	0.312532	4.08312	2087	1540	7828	4201	1	0.0219085	C5	PTM	8959	0.572241
P2#alignments.possorted.tagged_BC02598_N02	P2	21.275	1300	4791	351	0.306056	4.15953	2116	1517	7827	4194	0.333333	0.0224224	C6	Stroma	8923	0.570014
P2#alignments.possorted.tagged_BC01234_N01	P2	15.929	1094	4247	301	0.271374	3.46378	1856	1753	7825	4216	0.3	0.0192332	C5	PTM	8676	0.554377
P2#alignments.possorted.tagged_BC02634_N02	P2	19.787	1299	4682	333	0.299246	4.23628	1949	1494	7823	4380	0.933333	0.0212834	C6	Stroma	8498	0.543142
P2#alignments.possorted.tagged_BC02895_N02	P2	22.483	1476	5538	377	0.353956	3.65101	1755	1682	7823	4386	0.966667	0.0240956	C6	Stroma	9620	0.614854
P2#alignments.possorted.tagged_BC03107_N02	P2	13.917	1244	4481	330	0.286472	4.72967	1748	1365	7821	4708	0.433333	0.021097	C6	Stroma	7942	0.507736
P2#alignments.possorted.tagged_BC04681_N04	P2	21.734	1361	4951	379	0.31656	2.72204	655	2101	7820	5064	0	0.0242327	C3	Sertoli cells	8943	0.571803
P2#alignments.possorted.tagged_BC03375_N03	P2	19.253	1157	4468	314	0.285751	4.17748	1719	1510	7818	4589	0	0.0200819	C5	PTM	8602	0.550141
P2#alignments.possorted.tagged_BC04499_N04	P2	20.627	1375	4925	305	0.315019	3.54213	1396	1721	7817	4700	0.8	0.0195088	C5	PTM	9256	0.592043
P2#alignments.possorted.tagged_BC03260_N02	P2	22.178	1344	4744	316	0.30348	3.56809	1872	1711	7816	4233	0.0666667	0.0202149	C3	Sertoli cells	8645	0.553032
P2#alignments.possorted.tagged_BC02947_N02	P2	20.89	1498	5628	350	0.360077	2.96701	1305	1970	7815	4540	1.96667	0.0223928	C6	Stroma	9686	0.619706
P2#alignments.possorted.tagged_BC04253_N04	P2	18.429	1154	4486	302	0.287012	2.70379	920	2110	7815	4785	0.5	0.0193218	C6	Stroma	8305	0.53135
P2#alignments.possorted.tagged_BC01218_N01	P2	19.571	1354	5246	372	0.335808	3.53864	1847	1721	7811	4243	4.6	0.0238126	C8	Innate lymph	8952	0.573038
P2#alignments.possorted.tagged_BC01230_N01	P2	17.084	1251	4648	348	0.297643	3.70361	1977	1660	7808	4171	0.733333	0.0222848	C5	PTM	8883	0.56884
P2#alignments.possorted.tagged_BC01552_N02	P2	20.954	1291	4632	316	0.296657	4.33995	1778	1462	7807	4567	1.2	0.0202382	C6	Stroma	8450	0.541181
P2#alignments.possorted.tagged_BC01259_N01	P2	23.402	1430	5194	355	0.332693	4.54797	1759	1407	7806	4640	0.333333	0.0227389	C6	Stroma	8823	0.565142
P2#alignments.possorted.tagged_BC01529_N02	P2	17.032	1273	4891	314	0.313325	3.96186	2180	1573	7805	4052	4.36667	0.0201153	C6	Stroma	9024	0.578091
P2#alignments.possorted.tagged_BC03472_N04	P2	29.084	1880	6003	396	0.384561	1.85375	66	2735	7805	5004	0.533333	0.0253684	C6	Stroma	10099	0.646957
P2#alignments.possorted.tagged_BC01151_N01	P2	18.436	1201	4480	351	0.287032	2.84623	1548	2029	7804	4227	0.566667	0.0224885	C6	Stroma	8319	0.532996
P2#alignments.possorted.tagged_BC01222_N01	P2	18.168	1156	4444	363	0.284835	3.5302	1844	1722	7801	4235	0.0666667	0.0232662	C3	Sertoli cells	8010	0.513396
P2#alignments.possorted.tagged_BC03336_N02	P2	20.776	1322	4576	357	0.293296	3.78883	1840	1629	7801	4332	0.1	0.0228817	C5	PTM	8975	0.575247
P2#alignments.possorted.tagged_BC01171_N01	P2	21.566	1394	5103	314	0.327115	2.46821	1495	2249	7800	4056	0.166667	0.0201282	C6	Stroma	8761	0.561603
P2#alignments.possorted.tagged_BC02884_N03	P2	23.264	1539	5751	335	0.368654	3.00411	1449	1948	7800	4403	0.266667	0.0214744	C6	Stroma	9356	0.599744
P2#alignments.possorted.tagged_BC03473_N03	P2	20.438	1445	5160	354	0.330769	3.7941	1684	1627	7800	4489	0.0666667	0.0226923	C3	Sertoli cells	9521	0.610321
P2#alignments.possorted.tagged_BC04250_N05	P2	32.119	1768	6147	381	0.39414	2.86231	720	2019	7798	5059	2.76667	0.0244293	C6	Stroma	9602	0.615671
P2#alignments.possorted.tagged_BC01223_N01	P2	19.142	1305	4728	303	0.303232	3.77989	2016	1631	7796	4149	0.633333	0.019433	C5	Stroma	8970	0.575295
P2#alignments.possorted.tagged_BC01226_N01	P2	19.063	1290	4552	267	0.29202	3.19258	1547	1859	7794	4388	2.4	0.0171286	C5	PTM	9246	0.593149
P2#alignments.possorted.tagged_BC01238_N01	P2	19.894	1296	5019	347	0.321978	3.5	1915	1732	7794	4147	0.1	0.0222607	C6	Stroma	8702	0.55825
P2#alignments.possorted.tagged_BC02164_N02	P2	15.475	1055	4158	277	0.266778	4.09346	1856	1530	7793	4407	0.0666667	0.0177724	C6	Stroma	8556	0.548954
P2#alignments.possorted.tagged_BC03120_N02	P2	16.678	1356	5040	365	0.323616	3.49077	1712	1734	7787	4341	0.333333	0.0234365	C3	Sertoli cells	9108	0.584821
P2#alignments.possorted.tagged_BC02001_N02	P2	20.902	1235	4721	380	0.303211	4.24596	1915	1484	7785	4386	0.166667	0.0244059	C6	Stroma	8721	0.560116
P2#alignments.possorted.tagged_BC01274_N01	P2	14.659	1029	4082	286	0.262238	3.68855	1664	1660	7783	4459	0.233333	0.0183734	C6	Stroma	8724	0.560452
P2#alignments.possorted.tagged_BC03487_N03	P2	34.063	1875	6692	439	0.429967	2.84676	1443	2023	7782	4316	1	0.0282061	C7	Stroma	9367	0.601838
P2#alignments.possorted.tagged_BC01258_N01	P2	20.256	1473	5377	406	0.345566	3.59811	1753	1692	7780	4335	0.533333	0.0260925	C6	Stroma	9024	0.579949
P2#alignments.possorted.tagged_BC04333_N03	P2	18.699	1322	4787	360	0.307727	4.1992	1684	1496	7778	4598	1.36667	0.0231422	C6	Stroma	8761	0.563191
P2#alignments.possorted.tagged_BC02486_N02	P2	22.772	1380	5133	316	0.330012	3.06534	1899	1913	7777	3965	0.6	0.0203163	C5	PTM	9496	0.610518
P2#alignments.possorted.tagged_BC02524_N02	P2	14.893	1083	4252	290	0.273405	4.51099	2169	1411	7776	4196	0	0.0186471	C3	Sertoli cells	7917	0.509066
P2#alignments.possorted.tagged_BC03228_N02	P2	20.548	1432	5301	312	0.340856	3.6787	1912	1662	7776	4202	0.733333	0.0200617	C6	Stroma	9209	0.592142
P2#alignments.possorted.tagged_BC03482_N04	P2	23.26	1668	5996	358	0.385694	3.27323	993	1819	7773	4961	1.53333	0.0230284	C5	PTM	10042	0.645954
P2#alignments.possorted.tagged_BC02309_N02	P2	19.201	1183	4514	353	0.290401	3.48212	1935	1734	7772	4103	0.8	0.0227097	C6	Stroma	8323	0.535448
P2#alignments.possorted.tagged_BC03193_N02	P2	20.625	1479	5251	316	0.337815	3.90347	1811	1585	7772	4376	3.63333	0.0203294	C6	Stroma	9116	0.586464
P2#alignments.possorted.tagged_BC01197_N01	P2	15.699	1427	5552	326	0.357364	3.48499	1997	1732	7768	4039	0.433333	0.0209835	C6	Stroma	9019	0.580523
P2#alignments.possorted.tagged_BC02576_N02	P2	21.178	1262	4475	330	0.288078	3.51045	1774	1722	7767	4271	0.0666667	0.0212437	C5	PTM	8900	0.572937
P2#alignments.possorted.tagged_BC03254_N02	P2	17.081	1337	5068	358	0.326252	4.55182	2174	1399	7767	4194	1.36667	0.0230462	C6	Stroma	8807	0.56695
P2#alignments.possorted.tagged_BC02232_N02	P2	16.598	922	3489	357	0.224691	3.49306	1906	1728	7764	4130	0.133333	0.0229907	C6	Stroma	6264	0.4034
P2#alignments.possorted.tagged_BC04132_N03	P2	18.22	1371	4952	316	0.318949	2.98921	1199	1946	7763	4618	0.166667	0.020353	C6	Stroma	9518	0.613036
P2#alignments.possorted.tagged_BC05093_N04	P2	21.373	1673	5885	348	0.379042	2.19597	253	2429	7763	5081	1.16667	0.022414	C6	Stroma	10001	0.644145
P2#alignments.possorted.tagged_BC01263_N01	P2	17.654	1364	5086	346	0.327622	3.4712	1449	1736	7762	4577	0.433333	0.0222881	C7	Stroma	8662	0.557975
P2#alignments.possorted.tagged_BC01224_N01	P2	17.584	1181	4569	323	0.29447	3.62061	1564	1679	7758	4515	0.1	0.0208172	C6	Stroma	8372	0.539572
P2#alignments.possorted.tagged_BC02204_N02	P2	16.52	1193	4426	342	0.285254	3.99549	2070	1553	7758	4135	0.1	0.0220418	C5	PTM	8994	0.57966
P2#alignments.possorted.tagged_BC01277_N01	P2	20.623	1583	5828	332	0.375709	3.24521	1737	1827	7756	4192	1.93333	0.0214028	C6	Stroma	9361	0.603468
P2#alignments.possorted.tagged_BC01266_N01	P2	18.597	1127	4173	311	0.269156	3.64748	1675	1668	7752	4409	0.0666667	0.0200593	C5	PTM	8711	0.561855
P2#alignments.possorted.tagged_BC01276_N01	P2	15.842	1088	4451	362	0.287198	3.9897	2274	1553	7749	3922	1.26667	0.0233579	C6	Stroma	7778	0.501871
P2#alignments.possorted.tagged_BC03109_N02	P2	16.95	1147	4366	329	0.281714	4.50746	1837	1407	7749	4505	2.23333	0.0212285	C5	PTM	8260	0.532972
P2#alignments.possorted.tagged_BC03600_N03	P2	16.581	1323	5024	353	0.324255	3.28959	1826	1806	7747	4115	0.633333	0.022783	C6	Stroma	8907	0.574868
P2#alignments.possorted.tagged_BC03043_N02	P2	15.613	1159	4311	309	0.278345	3.85213	1743	1596	7744	4405	0.166667	0.0199509	C6	Stroma	8561	0.552751
P2#alignments.possorted.tagged_BC02825_N02	P2	23.242	1385	5123	321	0.330815	3.44234	1852	1743	7743	4148	0.833333	0.0207284	C5	PTM	9315	0.601511
P2#alignments.possorted.tagged_BC03286_N03	P2	15.577	1117	4174	295	0.269638	3.43807	1398	1744	7740	4598	0.0666667	0.0190568	C5	PTM	8840	0.571059
P2#alignments.possorted.tagged_BC01272_N01	P2	18.825	1483	5146	289	0.332472	3.94189	1841	1566	7739	4332	0.866667	0.0186717	C6	Stroma	8917	0.576108
P2#alignments.possorted.tagged_BC02677_N03	P2	19.495	1270	4627	348	0.29894	3.73333	1552	1635	7739	4552	0.233333	0.0224835	C5	PTM	9043	0.584249
P2#alignments.possorted.tagged_BC04382_N03	P2	22.227	1448	5118	350	0.330748	2.94745	1119	1960	7737	4658	0.166667	0.0226186	C6	Stroma	8952	0.578519
P2#alignments.possorted.tagged_BC01249_N01	P2	19.013	1325	4773	333	0.308573	4.40839	1908	1430	7734	4396	0.0666667	0.0215283	C6	Stroma	8428	0.544867
P2#alignments.possorted.tagged_BC01242_N01	P2	16.537	1094	4341	246	0.28068	3.64724	2069	1664	7733	4000	0.1	0.0159059	C6	Stroma	8124	0.525281
P2#alignments.possorted.tagged_BC03181_N02	P2	26.65	1938	6915	437	0.447168	2.16237	1216	2445	7732	4071	0.733333	0.0282592	C3	Sertoli cells	9581	0.619568
P2#alignments.possorted.tagged_BC04422_N03	P2	25.67	1763	6195	339	0.400608	2.75887	1263	2057	7732	4412	0.766667	0.0219219	C5	PTM	9881	0.638968
P2#alignments.possorted.tagged_BC03359_N02	P2	17.104	1192	4657	350	0.30119	4.0795	1772	1522	7731	4437	2.06667	0.0226361	C5	PTM	8662	0.560212
P2#alignments.possorted.tagged_BC04014_N03	P2	25.899	1491	5445	321	0.352154	3.33109	1637	1785	7731	4309	0.366667	0.0207606	C6	Stroma	9324	0.603027
P2#alignments.possorted.tagged_BC03345_N03	P2	24.558	1451	5631	351	0.364277	2.4957	1188	2211	7729	4330	1.3	0.0227067	C6	Stroma	9407	0.608552
P2#alignments.possorted.tagged_BC02320_N02	P2	18.243	1170	4616	307	0.298693	4.39218	1794	1433	7727	4500	0.733333	0.0198654	C5	PTM	8953	0.579332
P2#alignments.possorted.tagged_BC04916_N04	P2	27.133	1795	6109	401	0.395302	2.33492	444	2317	7727	4966	2.1	0.025948	C6	Stroma	9585	0.620228
P2#alignments.possorted.tagged_BC01866_N02	P2	15.925	1150	4414	320	0.28577	3.41819	1271	1748	7723	4704	0.133333	0.0207173	C4	Leydig cells	8345	0.540269
P2#alignments.possorted.tagged_BC03159_N02	P2	21.176	1433	5546	353	0.359243	2.94229	1718	1958	7719	4043	4.3	0.0228657	C7	Vascular mural cells	9378	0.607462
P2#alignments.possorted.tagged_BC03210_N02	P2	19.236	1156	4420	328	0.286307	3.45156	1918	1734	7719	4067	1.36667	0.0212463	C6	Stroma	8124	0.526234
P2#alignments.possorted.tagged_BC01262_N01	P2	17.432	1162	4389	285	0.284409	4.0998	1817	1513	7716	4386	0.266667	0.0184681	C6	Stroma	8298	0.537714
P2#alignments.possorted.tagged_BC01216_N01	P2	18.589	1211	4631	345	0.300285	3.31989	1745	1785	7711	4181	0.4	0.0223706	C6	Stroma	8183	0.530606
P2#alignments.possorted.tagged_BC02310_N02	P2	19.731	1385	5024	302	0.325895	4.14553	2067	1498	7708	4143	2.93333	0.01959	C5	PTM	9007	0.584263
P2#alignments.possorted.tagged_BC01311_N01	P2	17.607	1147	4380	265	0.284157	4.29327	1942	1456	7707	4309	0.0666667	0.0171922	C5	PTM	8290	0.537823
P2#alignments.possorted.tagged_BC01918_N02	P2	24.798	1365	5218	320	0.338523	3.1592	1801	1853	7707	4053	0.366667	0.0207603	C6	Stroma	9072	0.588556
P2#alignments.possorted.tagged_BC03204_N02	P2	17.922	1258	4555	372	0.295511	3.56846	1563	1687	7707	4457	2	0.0241339	C5	PTM	8648	0.561048
P2#alignments.possorted.tagged_BC02553_N02	P2	25.743	1235	4489	304	0.291267	3.93026	1803	1563	7706	4340	0.0333333	0.0197249	C6	Stroma	8783	0.569881
P2#alignments.possorted.tagged_BC04811_N04	P2	25.002	1654	5691	383	0.369258	2.21217	471	2399	7706	4836	4.73333	0.0248508	C5	PTM	9832	0.637944
P2#alignments.possorted.tagged_BC04921_N04	P2	26.976	1553	5623	369	0.364893	2.65859	1014	2106	7705	4585	3.53333	0.0239455	C6	Stroma	9419	0.611226
P2#alignments.possorted.tagged_BC01279_N01	P2	19.307	1365	4997	370	0.324396	4.11082	1901	1507	7702	4294	0.2	0.0240197	C6	Stroma	8814	0.572189
P2#alignments.possorted.tagged_BC01275_N01	P2	22.368	1412	5301	356	0.34431	3.16558	1520	1848	7698	4330	3.36667	0.0231229	C6	Stroma	9083	0.589958
P2#alignments.possorted.tagged_BC03357_N03	P2	18.942	1454	5219	365	0.338984	3.81426	1563	1599	7698	4536	3.63333	0.0237075	C6	Stroma	9045	0.58749
P2#alignments.possorted.tagged_BC01306_N01	P2	14.535	1057	4235	294	0.275143	4.12043	1868	1503	7696	4325	0.2	0.0191008	C5	PTM	8444	0.548597
P2#alignments.possorted.tagged_BC01302_N01	P2	16.322	1154	4896	354	0.318211	5.4055	2478	1201	7693	4014	0.133333	0.0230079	C5	Stroma	8380	0.544651
P2#alignments.possorted.tagged_BC04122_N03	P2	21.969	1409	5336	344	0.346854	4.05388	1632	1522	7692	4538	1.23333	0.0223609	C6	Stroma	8877	0.577028
P2#alignments.possorted.tagged_BC02429_N02	P2	19.54	1194	4458	348	0.289932	3.8689	1801	1579	7688	4308	0.133333	0.0226327	C5	PTM	8548	0.555931
P2#alignments.possorted.tagged_BC01959_N02	P2	16.744	1150	4401	338	0.286337	3.95806	1953	1550	7685	4182	0.333333	0.0219909	C6	Stroma	8271	0.538126
P2#alignments.possorted.tagged_BC03308_N03	P2	19.884	1456	5226	362	0.340057	3.2453	1015	1810	7684	4859	1.2	0.0235554	C5	PTM	9223	0.600143
P2#alignments.possorted.tagged_BC01877_N02	P2	20.72	1580	5742	356	0.373731	2.89554	2142	1972	7682	3568	3.63333	0.023171	C7	Vascular mural cells	9453	0.615269
P2#alignments.possorted.tagged_BC01255_N01	P2	19.328	1347	5034	369	0.327905	3.57449	1889	1678	7676	4109	0.1	0.024036	C6	Stroma	8530	0.555628
P2#alignments.possorted.tagged_BC01235_N01	P2	19.998	1323	4980	321	0.324472	3.51677	1712	1699	7674	4263	0.566667	0.0209148	C6	Stroma	8810	0.574016
P2#alignments.possorted.tagged_BC02194_N02	P2	17.471	1147	4316	281	0.281209	3.69933	1832	1633	7674	4209	0.1	0.0183086	C5	PTM	8519	0.555056
P2#alignments.possorted.tagged_BC02750_N02	P2	17.252	1211	4513	346	0.294237	3.35986	1751	1759	7669	4159	0.0333333	0.0225584	C3	Sertoli cells	8330	0.543096
P2#alignments.possorted.tagged_BC02502_N03	P2	23.339	1379	5119	345	0.33379	3.32244	1520	1774	7668	4374	2.16667	0.0224961	C5	PTM	9110	0.594027
P2#alignments.possorted.tagged_BC02959_N02	P2	24.592	1453	5180	371	0.337767	4.13941	2119	1492	7668	4057	0.266667	0.0241914	C6	Stroma	9188	0.599113
P2#alignments.possorted.tagged_BC03935_N03	P2	22.293	1396	4994	331	0.325639	3.51059	1416	1700	7668	4552	0.7	0.0215832	C5	PTM	9048	0.589984
P2#alignments.possorted.tagged_BC01247_N01	P2	19.549	1392	5122	296	0.334073	3.69155	1747	1634	7666	4285	1.46667	0.019306	C6	Stroma	9065	0.591247
P2#alignments.possorted.tagged_BC01691_N02	P2	21.954	1275	4652	294	0.303418	4.03349	1979	1523	7666	4164	0.4	0.0191756	C5	PTM	8826	0.575659
P2#alignments.possorted.tagged_BC03415_N02	P2	24.477	1508	5447	338	0.35527	3.55226	1511	1684	7666	4471	1.36667	0.0220454	C5	Stroma	9346	0.609575
P2#alignments.possorted.tagged_BC01852_N02	P2	18.514	1337	4914	339	0.32059	4.2314	1770	1465	7664	4429	0.4	0.0221164	C5	PTM	8968	0.585073
P2#alignments.possorted.tagged_BC01330_N01	P2	13.421	976	3986	282	0.260081	4.50108	1987	1393	7663	4283	0.0333333	0.0184001	C6	Stroma	7856	0.512593
P2#alignments.possorted.tagged_BC04261_N03	P2	19.04	1250	4705	316	0.306995	3.37886	1476	1750	7663	4437	0.3	0.0206186	C6	Stroma	8589	0.56042
P2#alignments.possorted.tagged_BC01252_N01	P2	23.654	1314	4810	330	0.313928	3.57646	1479	1674	7661	4508	0.433333	0.0215377	C6	Stroma	8386	0.547318
P2#alignments.possorted.tagged_BC05101_N04	P2	26.281	1367	4935	368	0.322128	3.03795	870	1897	7660	4893	0	0.0240209	C3	Sertoli cells	9098	0.593864
P2#alignments.possorted.tagged_BC01301_N01	P2	20.776	1259	4653	341	0.3038	4.06147	1624	1513	7658	4521	0.6	0.0222643	C6	Stroma	8664	0.565683
P2#alignments.possorted.tagged_BC03453_N03	P2	21.731	1262	4434	296	0.289539	3.88018	1735	1569	7657	4353	0.466667	0.0193287	C5	PTM	8690	0.567455
P2#alignments.possorted.tagged_BC04409_N04	P2	18.186	1249	4619	309	0.301659	3.81509	1265	1590	7656	4801	0.0666667	0.0201803	C6	Stroma	8885	0.580264
P2#alignments.possorted.tagged_BC02839_N03	P2	18.049	1194	4511	311	0.294644	3.54033	1282	1686	7655	4687	0.7	0.0203135	C6	Stroma	8716	0.569301
P2#alignments.possorted.tagged_BC01269_N01	P2	16.232	1123	4240	362	0.276979	3.99608	2100	1532	7654	4022	0.0333333	0.0236478	C6	Stroma	7959	0.519924
P2#alignments.possorted.tagged_BC03580_N03	P2	24.222	1370	4853	326	0.317024	3.81081	1671	1591	7654	4392	0.533333	0.0212961	C6	Leydig cells	8679	0.566958
P2#alignments.possorted.tagged_BC04341_N03	P2	21.799	1299	4843	353	0.316412	3.66931	1662	1639	7653	4352	1.3	0.0230629	C6	Stroma	8466	0.553116
P2#alignments.possorted.tagged_BC02028_N02	P2	24.001	1309	4358	341	0.284762	1.54135	569	3011	7652	4072	1.1	0.0222818	C6	Stroma	6951	0.454195
P2#alignments.possorted.tagged_BC02876_N02	P2	17.851	1217	4648	283	0.303791	3.34906	1821	1759	7650	4070	0.366667	0.0184967	C5	PTM	9020	0.589542
P2#alignments.possorted.tagged_BC01199_N01	P2	16.524	1210	4727	343	0.308995	3.92531	1857	1553	7649	4239	0.366667	0.0224212	C5	PTM	8802	0.575369
P2#alignments.possorted.tagged_BC02209_N02	P2	23.326	1496	5581	359	0.364914	2.75959	1504	2034	7647	4109	1.03333	0.0234733	C6	Stroma	8975	0.586831
P2#alignments.possorted.tagged_BC02891_N02	P2	17.686	1438	5495	338	0.359291	3.80038	2126	1593	7647	3928	2.6	0.0221002	C6	Stroma	8873	0.580162
P2#alignments.possorted.tagged_BC04726_N04	P2	17.413	1319	5158	332	0.337256	3.39735	1524	1739	7647	4384	1.4	0.0217079	C6	Stroma	9218	0.60272
P2#alignments.possorted.tagged_BC03082_N02	P2	20.025	1436	5292	340	0.346063	3.60325	1928	1661	7646	4057	0.933333	0.0222338	C6	Stroma	8729	0.570821
P2#alignments.possorted.tagged_BC01268_N01	P2	17.651	1034	4143	297	0.270961	4.07973	1943	1505	7645	4197	0.2	0.0194245	C6	Stroma	7724	0.505167
P2#alignments.possorted.tagged_BC02266_N02	P2	16.76	1058	4237	304	0.277182	3.19024	1714	1824	7643	4105	0.633333	0.0198875	C5	PTM	8576	0.561036
P2#alignments.possorted.tagged_BC03011_N02	P2	29.224	1771	6162	349	0.403167	3.02422	1531	1899	7642	4212	0.533333	0.0228343	C6	Stroma	9116	0.596441
P2#alignments.possorted.tagged_BC03018_N02	P2	22.505	1307	4760	352	0.311437	4.29224	1759	1444	7642	4439	0.0333333	0.0230306	C3	Sertoli cells	8221	0.537883
P2#alignments.possorted.tagged_BC03160_N02	P2	14.398	698	3343	444	0.218754	5.8041	1598	1123	7641	4920	0.233333	0.0290538	C2	Germ cells	5788	0.378746
P2#alignments.possorted.tagged_BC01327_N01	P2	18.285	1302	5123	331	0.335319	3.56605	1698	1673	7639	4268	0.4	0.0216651	C6	Stroma	9537	0.624231
P2#alignments.possorted.tagged_BC01294_N01	P2	17.215	965	3855	304	0.252456	3.68692	1813	1629	7635	4193	0.1	0.0199083	C6	Stroma	8157	0.534185
P2#alignments.possorted.tagged_BC01288_N01	P2	19.817	1361	4934	312	0.323244	4.08123	1840	1502	7632	4290	0.233333	0.0204403	C6	Stroma	8795	0.576192
P2#alignments.possorted.tagged_BC02590_N03	P2	20.526	1275	4624	276	0.302935	3.54286	1821	1680	7632	4131	0.3	0.0180818	C5	PTM	9114	0.597091
P2#alignments.possorted.tagged_BC03039_N03	P2	21.88	1337	4989	345	0.326847	3.78795	1774	1594	7632	4264	2.9	0.0226022	C5	PTM	9039	0.592178
P2#alignments.possorted.tagged_BC04314_N04	P2	26.086	1594	5588	356	0.36609	3.32163	1366	1766	7632	4500	2.13333	0.0233229	C5	PTM	9683	0.634368
[truncated: 23,614 more rows]
