# Supplementary material for: The single-cell chromatin accessibility landscape in mouse perinatal testis development
Source: eLife journal article supplement (doi:10.7554/elife.75624), 2023-04-25
Supplement: supp [file elife-75624-supp-v1.zip › elife_poa_e75624_Supplementary_file_4.xlsx]

## Sheet: Germ.DAR
chr7	29212383	29212884	.	0	.
chr9	3199590	3200091	.	0	.
chr7	29063499	29064000	.	0	.
chr7	35537487	35537988	.	0	.
chr14	19311579	19312080	.	0	.
chr2	178407479	178407980	.	0	.
chr13	95215756	95216257	.	0	.
chr9	124439590	124440091	.	0	.
chr1	186967398	186967899	.	0	.
chr2	36091210	36091711	.	0	.
chr7	41560603	41561104	.	0	.
chr7	107209133	107209634	.	0	.
chr15	88982577	88983078	.	0	.
chr4	134081845	134082346	.	0	.
chr7	140787611	140788112	.	0	.
chr2	32612186	32612687	.	0	.
chr4	141993997	141994498	.	0	.
chr14	56402410	56402911	.	0	.
chr17	50293416	50293917	.	0	.
chr13	93096631	93097132	.	0	.
chr17	56612000	56612501	.	0	.
chr7	42592328	42592829	.	0	.
chr15	89410039	89410540	.	0	.
chr10	86908455	86908956	.	0	.
chr14	87264462	87264963	.	0	.
chr1	91144777	91145278	.	0	.
chr6	17840385	17840886	.	0	.
chr6	18108806	18109307	.	0	.
chr8	109074961	109075462	.	0	.
chr3	40708588	40709089	.	0	.
chr5	129315470	129315971	.	0	.
chr11	98004949	98005450	.	0	.
chr5	107330864	107331365	.	0	.
chr8	105374483	105374984	.	0	.
chr3	55181778	55182279	.	0	.
chr1	133448287	133448788	.	0	.
chr3	48608843	48609344	.	0	.
chr4	155361274	155361775	.	0	.
chr5	110086165	110086666	.	0	.
chr13	105081854	105082355	.	0	.
chr13	81633006	81633507	.	0	.
chr15	36179098	36179599	.	0	.
chr11	116725179	116725680	.	0	.
chr6	53844631	53845132	.	0	.
chr9	3199084	3199585	.	0	.
chr7	43077786	43078287	.	0	.
chr5	109553382	109553883	.	0	.
chr7	24671880	24672381	.	0	.
chr11	4440910	4441411	.	0	.
chr6	89095780	89096281	.	0	.
chr14	106105963	106106464	.	0	.
chr12	29839941	29840442	.	0	.
chr5	97392105	97392606	.	0	.
chr12	66284227	66284728	.	0	.
chr14	34614936	34615437	.	0	.
chr1	36770937	36771438	.	0	.
chr9	47703238	47703739	.	0	.
chr6	145615710	145616211	.	0	.
chr10	71130175	71130676	.	0	.
chr1	36682910	36683411	.	0	.
chr7	141051218	141051719	.	0	.
chr5	134718439	134718940	.	0	.
chr3	86002340	86002841	.	0	.
chr2	127424908	127425409	.	0	.
chr5	148885780	148886281	.	0	.
chr14	70428867	70429368	.	0	.
chr14	54813926	54814427	.	0	.
chr11	121145793	121146294	.	0	.
chr2	151670513	151671014	.	0	.
chr4	59117748	59118249	.	0	.
chr7	101501212	101501713	.	0	.
chr1	69377709	69378210	.	0	.
chr12	101718200	101718701	.	0	.
chr6	49395235	49395736	.	0	.
chr2	84658824	84659325	.	0	.
chr3	102935881	102936382	.	0	.
chr7	29212939	29213440	.	0	.
chr5	111644234	111644735	.	0	.
chr13	49762170	49762671	.	0	.
chr10	80304822	80305323	.	0	.
chr7	29725667	29726168	.	0	.
chr17	12909704	12910205	.	0	.
chr4	148271529	148272030	.	0	.
chr7	29877490	29877991	.	0	.
chr11	104685586	104686087	.	0	.
chr19	58511928	58512429	.	0	.
chr8	4728140	4728641	.	0	.
chr11	73329367	73329868	.	0	.
chr10	88459346	88459847	.	0	.
chr9	75683703	75684204	.	0	.
chr7	30599916	30600417	.	0	.
chr6	25931068	25931569	.	0	.
chr10	108699898	108700399	.	0	.
chr17	37995546	37996047	.	0	.
chr8	71484038	71484539	.	0	.
chr12	86687954	86688455	.	0	.
chr1	136707323	136707824	.	0	.
chr5	120626474	120626975	.	0	.
chr13	59054302	59054803	.	0	.
chr6	125285804	125286305	.	0	.
chr8	119612408	119612909	.	0	.
chr3	153313486	153313987	.	0	.
chr4	143394119	143394620	.	0	.
chr7	25300982	25301483	.	0	.
chr13	30947489	30947990	.	0	.
chr12	111971298	111971799	.	0	.
chr7	36455160	36455661	.	0	.
chr1	69376820	69377321	.	0	.
chr8	104219073	104219574	.	0	.
chr7	19435060	19435561	.	0	.
chr13	66563632	66564133	.	0	.
chr13	43696013	43696514	.	0	.
chr7	24869688	24870189	.	0	.
chr10	70599437	70599938	.	0	.
chr2	39614090	39614591	.	0	.
chr13	26769848	26770349	.	0	.
chr10	7608593	7609094	.	0	.
chr6	113501635	113502136	.	0	.
chr6	58880288	58880789	.	0	.
chr14	120766337	120766838	.	0	.
chrX	6083193	6083694	.	0	.
chr9	42892660	42893161	.	0	.
chr7	28879646	28880147	.	0	.
chr8	121570734	121571235	.	0	.
chr13	26769163	26769664	.	0	.
chr5	135349772	135350273	.	0	.
chr7	120409396	120409897	.	0	.
chr9	108824673	108825174	.	0	.
chr5	104662046	104662547	.	0	.
chr7	87584140	87584641	.	0	.
chr15	82298988	82299489	.	0	.
chr17	57047332	57047833	.	0	.
chr2	150643906	150644407	.	0	.
chr2	151669994	151670495	.	0	.
chr5	108774807	108775308	.	0	.
chr7	140821723	140822224	.	0	.
chr17	55956089	55956590	.	0	.
chr12	111143132	111143633	.	0	.
chr7	30598701	30599202	.	0	.
chr14	47073989	47074490	.	0	.
chr13	20016409	20016910	.	0	.
chr19	29672570	29673071	.	0	.
chr4	150678705	150679206	.	0	.
chr1	166238488	166238989	.	0	.
chr9	98856272	98856773	.	0	.
chr7	16869425	16869926	.	0	.
chr8	121174150	121174651	.	0	.
chr3	141211585	141212086	.	0	.
chr2	80195838	80196339	.	0	.
chr10	93559710	93560211	.	0	.
chr7	43253483	43253984	.	0	.
chr6	48024470	48024971	.	0	.
chr6	142722648	142723149	.	0	.
chr4	138250011	138250512	.	0	.
chr11	98067215	98067716	.	0	.
chr7	29213514	29214015	.	0	.
chr6	135706970	135707471	.	0	.
chr12	21899088	21899589	.	0	.
chr7	12970739	12971240	.	0	.
chr1	17124425	17124926	.	0	.
chr6	51592390	51592891	.	0	.
chr8	117589312	117589813	.	0	.
chr6	126578415	126578916	.	0	.
chr1	193035198	193035699	.	0	.
chrX	101794309	101794810	.	0	.
chr6	86016752	86017253	.	0	.
chr7	42749823	42750324	.	0	.
chr2	32750715	32751216	.	0	.
chr9	62649394	62649895	.	0	.
chr12	20311844	20312345	.	0	.
chr5	9570186	9570687	.	0	.
chr9	75303922	75304423	.	0	.
chr5	76818798	76819299	.	0	.
chr8	27142929	27143430	.	0	.
chr15	25781023	25781524	.	0	.
chr14	33589020	33589521	.	0	.
chr4	152886697	152887198	.	0	.
chr7	27460018	27460519	.	0	.
chr4	115133566	115134067	.	0	.
chr6	126921334	126921835	.	0	.
chr14	46932083	46932584	.	0	.
chr13	55917248	55917749	.	0	.
chr12	117843420	117843921	.	0	.
chr12	114378673	114379174	.	0	.
chr16	97512303	97512804	.	0	.
chr2	144741954	144742455	.	0	.
chr4	95982015	95982516	.	0	.
chr5	135359233	135359734	.	0	.
chr6	115042039	115042540	.	0	.
chr12	102389974	102390475	.	0	.
chr7	42867006	42867507	.	0	.
chr1	9299562	9300063	.	0	.
chr10	128262249	128262750	.	0	.
chr18	36766016	36766517	.	0	.
chr3	108940100	108940601	.	0	.
chr9	45768385	45768886	.	0	.
chr13	23934374	23934875	.	0	.
chr16	3974429	3974930	.	0	.
chr14	44116798	44117299	.	0	.
chr5	66676461	66676962	.	0	.
chr7	49428827	49429328	.	0	.
chr2	104886056	104886557	.	0	.
chr9	21204481	21204982	.	0	.
chr17	30874228	30874729	.	0	.
chr8	37885213	37885714	.	0	.
chr2	118256488	118256989	.	0	.
chr18	84838410	84838911	.	0	.
chr5	115732480	115732981	.	0	.
chr9	114985623	114986124	.	0	.
chr7	43772830	43773331	.	0	.
chr18	22985012	22985513	.	0	.
chr11	84957519	84958020	.	0	.
chrX	86374170	86374671	.	0	.
chr5	102052491	102052992	.	0	.
chr9	122746971	122747472	.	0	.
chr2	76360196	76360697	.	0	.
chr6	141140979	141141480	.	0	.
chr12	72917653	72918154	.	0	.
chr4	131677934	131678435	.	0	.
chr3	52390734	52391235	.	0	.
chr4	139683873	139684374	.	0	.
chr2	105510750	105511251	.	0	.
chr15	103430179	103430680	.	0	.
chr12	104519350	104519851	.	0	.
chr1	31222449	31222950	.	0	.
chr8	63951806	63952307	.	0	.
chr19	47359141	47359642	.	0	.
chr6	146674264	146674765	.	0	.
chr1	88490183	88490684	.	0	.
chr7	29101101	29101602	.	0	.
chr11	65158005	65158506	.	0	.
chr2	122186089	122186590	.	0	.
chr15	71727689	71728190	.	0	.
chr9	70356334	70356835	.	0	.
chr14	118511670	118512171	.	0	.
chrX	134474938	134475439	.	0	.
chr6	90309073	90309574	.	0	.
chr17	49196334	49196835	.	0	.
chr1	167446514	167447015	.	0	.
chr10	29197041	29197542	.	0	.
chr11	45979861	45980362	.	0	.
chr4	63376841	63377342	.	0	.
chr3	92640001	92640502	.	0	.
chr3	41555416	41555917	.	0	.
chr17	29870218	29870719	.	0	.
chr8	122864540	122865041	.	0	.
chr8	122460488	122460989	.	0	.
chr8	110970626	110971127	.	0	.
chr8	8836105	8836606	.	0	.
chr13	99881714	99882215	.	0	.
chr18	56884039	56884540	.	0	.
chr12	18387099	18387600	.	0	.
chr7	35961478	35961979	.	0	.
chr15	91199214	91199715	.	0	.
chr2	92973490	92973991	.	0	.
chr7	28455658	28456159	.	0	.
chr5	117841843	117842344	.	0	.
chr7	141215529	141216030	.	0	.
chr2	174284976	174285477	.	0	.
chr14	8054244	8054745	.	0	.
chr3	152966534	152967035	.	0	.
chr7	12903581	12904082	.	0	.
chr6	54934628	54935129	.	0	.
chrX	101698195	101698696	.	0	.
chr9	44440774	44441275	.	0	.
chr5	131497498	131497999	.	0	.
chr2	85266727	85267228	.	0	.
chr9	103536023	103536524	.	0	.
chr17	15240575	15241076	.	0	.
chr11	113903110	113903611	.	0	.
chr17	47115703	47116204	.	0	.
chr5	139523004	139523505	.	0	.
chr7	29144260	29144761	.	0	.
chrX	9062637	9063138	.	0	.
chr4	142274359	142274860	.	0	.
chr1	86467302	86467803	.	0	.
chr5	137707649	137708150	.	0	.
chr18	76074923	76075424	.	0	.
chr10	62128630	62129131	.	0	.
chr17	27325041	27325542	.	0	.
chr10	8207253	8207754	.	0	.
chr1	34930478	34930979	.	0	.
chr8	116801232	116801733	.	0	.
chr8	33958404	33958905	.	0	.
chr17	48545449	48545950	.	0	.
chr2	172607711	172608212	.	0	.
chr19	3436827	3437328	.	0	.
chr5	134007051	134007552	.	0	.
chr16	86529798	86530299	.	0	.
chr15	74872858	74873359	.	0	.
chr8	70891316	70891817	.	0	.
chr12	102554953	102555454	.	0	.
chr9	24695999	24696500	.	0	.
chr3	106001288	106001789	.	0	.
chr3	37481207	37481708	.	0	.
chr7	34480668	34481169	.	0	.
chr2	10311659	10312160	.	0	.
chr13	62255120	62255621	.	0	.
chr5	136143604	136144105	.	0	.
chr4	123104790	123105291	.	0	.
chr1	4492445	4492946	.	0	.
chr3	38082320	38082821	.	0	.
chr10	6788606	6789107	.	0	.
chr5	31251472	31251973	.	0	.
chr4	95966938	95967439	.	0	.
chr5	128947852	128948353	.	0	.
chr8	108483963	108484464	.	0	.
chr1	184310263	184310764	.	0	.
chr9	58741325	58741826	.	0	.
chr4	141819155	141819656	.	0	.
chr11	88307849	88308350	.	0	.
chr15	88890998	88891499	.	0	.
chr1	79671729	79672230	.	0	.
chr16	92571164	92571665	.	0	.
chr5	45584041	45584542	.	0	.
chr2	180522736	180523237	.	0	.
chr9	21066707	21067208	.	0	.
chr9	53070865	53071366	.	0	.
chr1	112485991	112486492	.	0	.
chr13	3477977	3478478	.	0	.
chr13	61712719	61713220	.	0	.
chr3	125938765	125939266	.	0	.
chr7	44433320	44433821	.	0	.
chr17	27639014	27639515	.	0	.
chr3	30658448	30658949	.	0	.
chr11	58961607	58962108	.	0	.
chr3	90454886	90455387	.	0	.
chr4	138706589	138707090	.	0	.
chr2	38379143	38379644	.	0	.
chr4	47111327	47111828	.	0	.
chr5	66594838	66595339	.	0	.
chr4	53864363	53864864	.	0	.
chr13	62219204	62219705	.	0	.
chr1	189869541	189870042	.	0	.
chr13	3865600	3866101	.	0	.
chr11	103627423	103627924	.	0	.
chr9	54837698	54838199	.	0	.
chr19	38119974	38120475	.	0	.
chr9	115216259	115216760	.	0	.
chr2	178512994	178513495	.	0	.
chr9	121936935	121937436	.	0	.
chr10	44005593	44006094	.	0	.
chr1	172495985	172496486	.	0	.
chr6	42558528	42559029	.	0	.
chr1	34177891	34178392	.	0	.
chr12	55917003	55917504	.	0	.
chr10	111361976	111362477	.	0	.
chr11	105165048	105165549	.	0	.
chr1	151879399	151879900	.	0	.
chr3	152100377	152100878	.	0	.
chr11	97066881	97067382	.	0	.
chr9	35359952	35360453	.	0	.
chr16	10357889	10358390	.	0	.
chr2	178406710	178407211	.	0	.
chr12	87026213	87026714	.	0	.
chr9	50561066	50561567	.	0	.
chr5	148303153	148303654	.	0	.
chr10	50894683	50895184	.	0	.
chr9	69364054	69364555	.	0	.
chr4	122022670	122023171	.	0	.
chr5	112355844	112356345	.	0	.
chr6	135826872	135827373	.	0	.
chr11	85111023	85111524	.	0	.
chr8	105336277	105336778	.	0	.
chr2	113327430	113327931	.	0	.
chr17	61902817	61903318	.	0	.
chr3	116024222	116024723	.	0	.
chr2	170863127	170863628	.	0	.
chr17	9669437	9669938	.	0	.
chr6	125049635	125050136	.	0	.
chr4	44959088	44959589	.	0	.
chr7	80098331	80098832	.	0	.
chr14	33978571	33979072	.	0	.
chr3	37063310	37063811	.	0	.
chrX	7072062	7072563	.	0	.
chr10	81534771	81535272	.	0	.
chr7	27494700	27495201	.	0	.
chr6	82946642	82947143	.	0	.
chr5	107829940	107830441	.	0	.
chr15	88399916	88400417	.	0	.
chr8	122870278	122870779	.	0	.
chr17	29322488	29322989	.	0	.
chr6	117871013	117871514	.	0	.
chr1	89931091	89931592	.	0	.
chr7	128688123	128688624	.	0	.
chr5	93748681	93749182	.	0	.
chr5	104609138	104609639	.	0	.
chr2	25094984	25095485	.	0	.
chr3	108772275	108772776	.	0	.
chr17	51677890	51678391	.	0	.
chr4	152340837	152341338	.	0	.
chr3	153173512	153174013	.	0	.
chr15	72006683	72007184	.	0	.
chr17	71751139	71751640	.	0	.
chr5	147745236	147745737	.	0	.
chr14	89896735	89897236	.	0	.
chr8	120518635	120519136	.	0	.
chr7	44638553	44639054	.	0	.
chr2	104556521	104557022	.	0	.
chr5	77102572	77103073	.	0	.
chr7	41739824	41740325	.	0	.
chr3	51952164	51952665	.	0	.
chr4	124973240	124973741	.	0	.
chr17	17850058	17850559	.	0	.
chr7	18937804	18938305	.	0	.
chr11	102665074	102665575	.	0	.
chr7	81453108	81453609	.	0	.
chr5	96355720	96356221	.	0	.
chr7	17056078	17056579	.	0	.
chr1	189194637	189195138	.	0	.
chr5	129116231	129116732	.	0	.
chr17	46674804	46675305	.	0	.
chr9	53705925	53706426	.	0	.
chr5	113596225	113596726	.	0	.
chr1	38239474	38239975	.	0	.
chr2	91630196	91630697	.	0	.
chr7	29792728	29793229	.	0	.
chr9	124440366	124440867	.	0	.
chr15	79906767	79907268	.	0	.
chr2	181696937	181697438	.	0	.
chr6	12554921	12555422	.	0	.
chr2	62664065	62664566	.	0	.
chr9	81863430	81863931	.	0	.
chr9	98864699	98865200	.	0	.
chrX	148882535	148883036	.	0	.
chr1	181576287	181576788	.	0	.
chr7	35678902	35679403	.	0	.
chr10	97744088	97744589	.	0	.
chr6	138658261	138658762	.	0	.
chr13	48490445	48490946	.	0	.
chr17	88486380	88486881	.	0	.
chr7	19324853	19325354	.	0	.
chr8	16686055	16686556	.	0	.
chr4	136290369	136290870	.	0	.
chr6	56369420	56369921	.	0	.
chr3	153905679	153906180	.	0	.
chr6	146855132	146855633	.	0	.
chr2	77839547	77840048	.	0	.
chr5	65379460	65379961	.	0	.
chr14	8054775	8055276	.	0	.
chr16	22572564	22573065	.	0	.
chr7	30476011	30476512	.	0	.
chr11	121118087	121118588	.	0	.
chr15	86718941	86719442	.	0	.
chr12	86977664	86978165	.	0	.
chr4	48767675	48768176	.	0	.
chr1	9908387	9908888	.	0	.
chr5	30092622	30093123	.	0	.
chr5	97087223	97087724	.	0	.
chr5	92941387	92941888	.	0	.
chr4	135292536	135293037	.	0	.
chr1	118257555	118258056	.	0	.
chr5	134843981	134844482	.	0	.
chr7	38111938	38112439	.	0	.
chr12	30922341	30922842	.	0	.
chr9	58234407	58234908	.	0	.
chr7	135395947	135396448	.	0	.
chr14	69190366	69190867	.	0	.
chr15	25713828	25714329	.	0	.
chr1	118627627	118628128	.	0	.
chr5	74126442	74126943	.	0	.
chr3	55139946	55140447	.	0	.
chr17	69196609	69197110	.	0	.
chr12	110429519	110430020	.	0	.
chr15	79481032	79481533	.	0	.
chr5	81794510	81795011	.	0	.
chr5	145218488	145218989	.	0	.
chr9	121443646	121444147	.	0	.
chr11	85876276	85876777	.	0	.
chr10	8835832	8836333	.	0	.
chr4	153936380	153936881	.	0	.
chr11	70135855	70136356	.	0	.
chr11	5062479	5062980	.	0	.
chr9	111294898	111295399	.	0	.
chr5	33501142	33501643	.	0	.
chr6	143221211	143221712	.	0	.
chr14	51434341	51434842	.	0	.
chr4	11386590	11387091	.	0	.
chr3	96463999	96464500	.	0	.
chr17	24015458	24015959	.	0	.
chr7	11988382	11988883	.	0	.
chr5	99652814	99653315	.	0	.
chr13	61642944	61643445	.	0	.
chr2	158375386	158375887	.	0	.
chr13	46011183	46011684	.	0	.
chr17	5418477	5418978	.	0	.
chr6	61311599	61312100	.	0	.
chr13	81435768	81436269	.	0	.
chr8	25899196	25899697	.	0	.
chr3	70899607	70900108	.	0	.
chr6	118197204	118197705	.	0	.
chr10	105818163	105818664	.	0	.
chr10	75333460	75333961	.	0	.
chr7	6189484	6189985	.	0	.
chr9	22076175	22076676	.	0	.
chr9	66152213	66152714	.	0	.
chr6	39848741	39849242	.	0	.
chr4	153670248	153670749	.	0	.
chr1	32172452	32172953	.	0	.
chr10	86079869	86080370	.	0	.
chr5	105480053	105480554	.	0	.
chr4	135573348	135573849	.	0	.
chr5	135133918	135134419	.	0	.
chr8	70374476	70374977	.	0	.
chr9	11277415	11277916	.	0	.
chr9	59375589	59376090	.	0	.
chr7	25396189	25396690	.	0	.
chr12	86469850	86470351	.	0	.
chr7	43267325	43267826	.	0	.
chr7	43646882	43647383	.	0	.
chr5	114490217	114490718	.	0	.
chr13	55378855	55379356	.	0	.
chr9	61753605	61754106	.	0	.
chr8	94977009	94977510	.	0	.
chr10	8580166	8580667	.	0	.
chr5	149641288	149641789	.	0	.
chr6	17064866	17065367	.	0	.
chr2	150181449	150181950	.	0	.
chr4	138724996	138725497	.	0	.
chr4	8866048	8866549	.	0	.
chr2	150257225	150257726	.	0	.
chr9	78367989	78368490	.	0	.
chr14	110970805	110971306	.	0	.
chr18	39397427	39397928	.	0	.
chr17	29188927	29189428	.	0	.
chr11	40600063	40600564	.	0	.
chr18	88869970	88870471	.	0	.
chr4	150892774	150893275	.	0	.
chr9	110896508	110897009	.	0	.
chr5	137596693	137597194	.	0	.
chr4	140383528	140384029	.	0	.
chr8	66511442	66511943	.	0	.
chr1	85771079	85771580	.	0	.
chr12	100499681	100500182	.	0	.
chr8	105283043	105283544	.	0	.
chr10	108264563	108265064	.	0	.
chr5	115602456	115602957	.	0	.
chr4	11387151	11387652	.	0	.
chr5	142701060	142701561	.	0	.
chrX	73401111	73401612	.	0	.
chr1	118837465	118837966	.	0	.
chr6	85484015	85484516	.	0	.
chr9	78167068	78167569	.	0	.
chr1	182483181	182483682	.	0	.
chr7	37842138	37842639	.	0	.
chr5	65871230	65871731	.	0	.
chr4	119638518	119639019	.	0	.
chr6	54944056	54944557	.	0	.
chr13	12525978	12526479	.	0	.
chr13	18211187	18211688	.	0	.
chr16	3689563	3690064	.	0	.
chr13	34746862	34747363	.	0	.
chr3	116347470	116347971	.	0	.
chr19	43427158	43427659	.	0	.
chr5	110378215	110378716	.	0	.
chr5	112265533	112266034	.	0	.
chr3	8805609	8806110	.	0	.
chr2	170356895	170357396	.	0	.
chr7	45786971	45787472	.	0	.
chr8	54724166	54724667	.	0	.
chr14	61525820	61526321	.	0	.
chr3	41557140	41557641	.	0	.
chr9	30137861	30138362	.	0	.
chr2	72769148	72769649	.	0	.
chr4	154857341	154857842	.	0	.
chr19	28677903	28678404	.	0	.
chr7	5031504	5032005	.	0	.
chr13	61839685	61840186	.	0	.
chr4	59719683	59720184	.	0	.
chr2	105311375	105311876	.	0	.
chr11	119833969	119834470	.	0	.
chr2	90929110	90929611	.	0	.
chr14	75064487	75064988	.	0	.
chr16	22187514	22188015	.	0	.
chr2	92640414	92640915	.	0	.
chr7	35111501	35112002	.	0	.
chr1	77975879	77976380	.	0	.
chr1	93667680	93668181	.	0	.
chr19	55729344	55729845	.	0	.
chr10	63192276	63192777	.	0	.
chr4	134734269	134734770	.	0	.
chr1	38430270	38430771	.	0	.
chr8	116670530	116671031	.	0	.
chr6	101151281	101151782	.	0	.
chr13	112652193	112652694	.	0	.
chr7	24470814	24471315	.	0	.
chr7	105685489	105685990	.	0	.
chr9	96870093	96870594	.	0	.
chr14	14347272	14347773	.	0	.
chr4	124881473	124881974	.	0	.
chr3	76074246	76074747	.	0	.
chr5	37040695	37041196	.	0	.
chr7	107371168	107371669	.	0	.
chr12	17062552	17063053	.	0	.
chr19	37018354	37018855	.	0	.
chr13	94225093	94225594	.	0	.
chr11	33829704	33830205	.	0	.
chr7	81152258	81152759	.	0	.
chr15	100280609	100281110	.	0	.
chr3	139573594	139574095	.	0	.
chr4	79327722	79328223	.	0	.
chr9	117861727	117862228	.	0	.
chr10	61064560	61065061	.	0	.
chr8	70792771	70793272	.	0	.
chr1	112486540	112487041	.	0	.
chr14	25665476	25665977	.	0	.
chr1	158356141	158356642	.	0	.
chr11	35707364	35707865	.	0	.
chr7	64268168	64268669	.	0	.
chr2	160583039	160583540	.	0	.
chr7	25611631	25612132	.	0	.
chr1	84878356	84878857	.	0	.
chr12	55420152	55420653	.	0	.
chr1	186966869	186967370	.	0	.
chr2	150484892	150485393	.	0	.
chr10	60257212	60257713	.	0	.
chr1	59094406	59094907	.	0	.
chr15	93503297	93503798	.	0	.
chr4	118997134	118997635	.	0	.
chr4	125282403	125282904	.	0	.
chr14	52047372	52047873	.	0	.
chr11	119159421	119159922	.	0	.
chr14	90702695	90703196	.	0	.
chr15	37347484	37347985	.	0	.
chr6	149565751	149566252	.	0	.
chr7	81151111	81151612	.	0	.
chr12	109790438	109790939	.	0	.
chr1	139379303	139379804	.	0	.
chr6	120644382	120644883	.	0	.
chr8	22838524	22839025	.	0	.
chr10	80395190	80395691	.	0	.
chrX	108405224	108405725	.	0	.
chr10	79613912	79614413	.	0	.
chr3	132903390	132903891	.	0	.
chr16	55865959	55866460	.	0	.
chr5	34288239	34288740	.	0	.
chr11	20020937	20021438	.	0	.
chr5	92809025	92809526	.	0	.
chr12	66283673	66284174	.	0	.
chr7	19811036	19811537	.	0	.
chr4	156228288	156228789	.	0	.
chr4	139345813	139346314	.	0	.
chr5	113164818	113165319	.	0	.
chr13	113606081	113606582	.	0	.
chr13	99433075	99433576	.	0	.
chr1	164149048	164149549	.	0	.
chr10	121750137	121750638	.	0	.
chr17	22497098	22497599	.	0	.
chr5	58751811	58752312	.	0	.
chr9	111467863	111468364	.	0	.
chrX	48877880	48878381	.	0	.
chr12	69908453	69908954	.	0	.
chr10	77864251	77864752	.	0	.
chr16	92605641	92606142	.	0	.
chr18	61626337	61626838	.	0	.
chr16	4849184	4849685	.	0	.
chr5	124725122	124725623	.	0	.
chr7	98423451	98423952	.	0	.
chr17	12080864	12081365	.	0	.
chr13	96748061	96748562	.	0	.
chr5	77222982	77223483	.	0	.
chr4	140810484	140810985	.	0	.
chr11	50713566	50714067	.	0	.
chr4	81399831	81400332	.	0	.
chr3	40683215	40683716	.	0	.
chr1	177681269	177681770	.	0	.
chr1	55362517	55363018	.	0	.
chr12	102722390	102722891	.	0	.
chr14	33189829	33190330	.	0	.
chr1	86021976	86022477	.	0	.
chr5	137641014	137641515	.	0	.
chr11	32580441	32580942	.	0	.
chr6	145361050	145361551	.	0	.
chr9	107193106	107193607	.	0	.
chr3	95865535	95866036	.	0	.
chr1	185061955	185062456	.	0	.
chr3	49643745	49644246	.	0	.
chr7	127444241	127444742	.	0	.
chr13	28886573	28887074	.	0	.
chr8	104509500	104510001	.	0	.
chr8	47390521	47391022	.	0	.
chr4	150164825	150165326	.	0	.
chr6	87119454	87119955	.	0	.
chr7	89246485	89246986	.	0	.
chr11	35985735	35986236	.	0	.
chr11	24164542	24165043	.	0	.
chr13	66698032	66698533	.	0	.
chr3	90709949	90710450	.	0	.
chr3	128099522	128100023	.	0	.
chr5	52368332	52368833	.	0	.
chrX	91313122	91313623	.	0	.
chr8	84223251	84223752	.	0	.
chr10	80450594	80451095	.	0	.
chr7	4844896	4845397	.	0	.
chr9	49873467	49873968	.	0	.
chr14	57542212	57542713	.	0	.
chr6	87289633	87290134	.	0	.
chr10	70004769	70005270	.	0	.
chr8	25985941	25986442	.	0	.
chr3	53657217	53657718	.	0	.
chr5	112583248	112583749	.	0	.
chr6	122355839	122356340	.	0	.
chr13	48497865	48498366	.	0	.
chr1	4492969	4493470	.	0	.
chr7	6183783	6184284	.	0	.
chr7	29528553	29529054	.	0	.
chr12	117809715	117810216	.	0	.
chr6	3904637	3905138	.	0	.
chr15	84772686	84773187	.	0	.
chr14	122034394	122034895	.	0	.
chr4	132356214	132356715	.	0	.
chr12	70246003	70246504	.	0	.
chr6	71293527	71294028	.	0	.
chr9	21233343	21233844	.	0	.
chr4	129440579	129441080	.	0	.
chr11	116705330	116705831	.	0	.
chr8	118028053	118028554	.	0	.
chr6	145545907	145546408	.	0	.
chr11	121925160	121925661	.	0	.
chr10	112270957	112271458	.	0	.
chr11	59787425	59787926	.	0	.
chr7	115453247	115453748	.	0	.
chr18	37768031	37768532	.	0	.
chr4	135698474	135698975	.	0	.
chr18	8236142	8236643	.	0	.
chr11	5160668	5161169	.	0	.
chr13	66291169	66291670	.	0	.
chr8	4226617	4227118	.	0	.
chrX	68761790	68762291	.	0	.
chr4	65613973	65614474	.	0	.
chr5	146384906	146385407	.	0	.
chr10	81018211	81018712	.	0	.
chr2	74564049	74564550	.	0	.
chr8	26382323	26382824	.	0	.
chr5	7857222	7857723	.	0	.
chr3	87566002	87566503	.	0	.
chr2	164716098	164716599	.	0	.
chr10	82920594	82921095	.	0	.
chr8	55940131	55940632	.	0	.
chr8	33516391	33516892	.	0	.
chr10	117316557	117317058	.	0	.
chr9	98842087	98842588	.	0	.
chr2	167078451	167078952	.	0	.
chr5	144729232	144729733	.	0	.
chr7	6995180	6995681	.	0	.
chr17	56424955	56425456	.	0	.
chr9	52802911	52803412	.	0	.
chr18	67472709	67473210	.	0	.
chr2	30985260	30985761	.	0	.
chr6	134248185	134248686	.	0	.
chr17	5853851	5854352	.	0	.
chr4	148874072	148874573	.	0	.
chr8	3536036	3536537	.	0	.
chr13	13721200	13721701	.	0	.
chr17	28941966	28942467	.	0	.
chr2	4700995	4701496	.	0	.
chr7	144942355	144942856	.	0	.
chr7	30882443	30882944	.	0	.
chr6	55018278	55018779	.	0	.
chr3	54633291	54633792	.	0	.
chr1	22533105	22533606	.	0	.
chr8	95545795	95546296	.	0	.
chr13	9387484	9387985	.	0	.
chr5	142212243	142212744	.	0	.
chr4	129928386	129928887	.	0	.
chr8	3496031	3496532	.	0	.
chr13	74591207	74591708	.	0	.
chr19	61313303	61313804	.	0	.
chr16	10169979	10170480	.	0	.
chr3	96396700	96397201	.	0	.
chr4	134990614	134991115	.	0	.
chr5	135754118	135754619	.	0	.
chr4	122008445	122008946	.	0	.
chr5	104722565	104723066	.	0	.
chr5	128536915	128537416	.	0	.
chr5	137454753	137455254	.	0	.
chr2	126780212	126780713	.	0	.
chr16	65572179	65572680	.	0	.
chr13	55474022	55474523	.	0	.
chr4	62727837	62728338	.	0	.
chr8	3718487	3718988	.	0	.
chr7	28668129	28668630	.	0	.
chr16	18036328	18036829	.	0	.
chr8	110970097	110970598	.	0	.
chr10	119021160	119021661	.	0	.
chr7	31028566	31029067	.	0	.
chr14	63493461	63493962	.	0	.
chr4	147928075	147928576	.	0	.
chr8	11825435	11825936	.	0	.
chr16	90496854	90497355	.	0	.
chr8	8710966	8711467	.	0	.
chr5	31610256	31610757	.	0	.
chr9	42927536	42928037	.	0	.
chr7	57509030	57509531	.	0	.
chr13	14316156	14316657	.	0	.
chr4	129381937	129382438	.	0	.
chr7	34619979	34620480	.	0	.
chr1	112416629	112417130	.	0	.
chr17	50394753	50395254	.	0	.
chr11	75234743	75235244	.	0	.
chr2	90636598	90637099	.	0	.
chr11	121956562	121957063	.	0	.
chr1	163624032	163624533	.	0	.
chr9	35188529	35189030	.	0	.
chr3	37668580	37669081	.	0	.
chr5	116116547	116117048	.	0	.
chr2	71751302	71751803	.	0	.
chr6	71106484	71106985	.	0	.
chr2	173326584	173327085	.	0	.
chr4	25432165	25432666	.	0	.
chr3	135505497	135505998	.	0	.
chr7	16301827	16302328	.	0	.
chr13	42184093	42184594	.	0	.
chr14	50795486	50795987	.	0	.
chr14	82974194	82974695	.	0	.
chr3	129474446	129474947	.	0	.
chr4	69854890	69855391	.	0	.
chr7	45134592	45135093	.	0	.
chrY	818317	818818	.	0	.
chr18	14705986	14706487	.	0	.
chr2	161341428	161341929	.	0	.
chr8	119384510	119385011	.	0	.
chr5	92925100	92925601	.	0	.
chr1	85929214	85929715	.	0	.
chr10	121853359	121853860	.	0	.
chr9	75468261	75468762	.	0	.
chr8	14038377	14038878	.	0	.
chr8	70787799	70788300	.	0	.
chr4	140004100	140004601	.	0	.
chr10	43511202	43511703	.	0	.
chr6	148768581	148769082	.	0	.
chr16	96353924	96354425	.	0	.
chr4	36951166	36951667	.	0	.
chr4	156059603	156060104	.	0	.
chr14	34607334	34607835	.	0	.
chr15	76910999	76911500	.	0	.
chr2	16571342	16571843	.	0	.
chr9	31463827	31464328	.	0	.
chr5	111643687	111644188	.	0	.
chr4	124332309	124332810	.	0	.
chr6	8777565	8778066	.	0	.
chr8	3994105	3994606	.	0	.
chr4	125598564	125599065	.	0	.
chr1	174836780	174837281	.	0	.
chr8	17909321	17909822	.	0	.
chr6	123793664	123794165	.	0	.
chr15	20436232	20436733	.	0	.
chr2	19445107	19445608	.	0	.
chr18	73378672	73379173	.	0	.
chr7	44444934	44445435	.	0	.
chr4	120079212	120079713	.	0	.
chr4	5798847	5799348	.	0	.
chr15	78992871	78993372	.	0	.
chr14	59370400	59370901	.	0	.
chr7	64053774	64054275	.	0	.
chr17	3074999	3075500	.	0	.
chr10	79738974	79739475	.	0	.
chr5	146933527	146934028	.	0	.
chr7	63099192	63099693	.	0	.
chr13	47365716	47366217	.	0	.
chr5	131099658	131100159	.	0	.
chr17	8260681	8261182	.	0	.
chr16	59529562	59530063	.	0	.
chr9	24774140	24774641	.	0	.
chr5	136678452	136678953	.	0	.
chr19	25605970	25606471	.	0	.
chr4	45953435	45953936	.	0	.
chr12	21898265	21898766	.	0	.
chr14	57036237	57036738	.	0	.
chr2	39420616	39421117	.	0	.
chr2	106920222	106920723	.	0	.
chr9	104895302	104895803	.	0	.
chrX	93980299	93980800	.	0	.
chr6	120665410	120665911	.	0	.
chr10	83661794	83662295	.	0	.
chr5	94392127	94392628	.	0	.
chr6	48025059	48025560	.	0	.
chr12	108292310	108292811	.	0	.
chr3	95559351	95559852	.	0	.
chr7	19586280	19586781	.	0	.
chr8	71741609	71742110	.	0	.
chr17	3414433	3414934	.	0	.
chr10	41481193	41481694	.	0	.
chr9	64120860	64121361	.	0	.
chr7	108950779	108951280	.	0	.
chr7	46218333	46218834	.	0	.
chr17	34813686	34814187	.	0	.
chr3	54634405	54634906	.	0	.
chr4	125850559	125851060	.	0	.
chr14	56364706	56365207	.	0	.
chr10	127369716	127370217	.	0	.
chr4	150880082	150880583	.	0	.
chr12	65225730	65226231	.	0	.
chr3	102935349	102935850	.	0	.
chr4	140065502	140066003	.	0	.
chr8	11924107	11924608	.	0	.
chr7	18921019	18921520	.	0	.
chr11	28339696	28340197	.	0	.
chr6	90232590	90233091	.	0	.
chr11	33749435	33749936	.	0	.
chr7	52005878	52006379	.	0	.
chr3	153675008	153675509	.	0	.
chr8	65618193	65618694	.	0	.
chr6	48620009	48620510	.	0	.
chr2	52001259	52001760	.	0	.
chr7	42738760	42739261	.	0	.
chr4	153715629	153716130	.	0	.
chr6	60828677	60829178	.	0	.
chr3	88643853	88644354	.	0	.
chr17	32033961	32034462	.	0	.
chr5	146895807	146896308	.	0	.
chr15	80115421	80115922	.	0	.
chr5	75194397	75194898	.	0	.
chr9	27478246	27478747	.	0	.
chr12	106158447	106158948	.	0	.
chr13	12540081	12540582	.	0	.
chr1	5588187	5588688	.	0	.
chr5	107534456	107534957	.	0	.
chr5	145161291	145161792	.	0	.
chr1	4491891	4492392	.	0	.
chr8	69813687	69814188	.	0	.
chr8	53591430	53591931	.	0	.
chr2	36242576	36243077	.	0	.
chr11	79015788	79016289	.	0	.
chr12	20312417	20312918	.	0	.
chr13	38022321	38022822	.	0	.
chr17	3878751	3879252	.	0	.
chr5	22552577	22553078	.	0	.
chr7	127867875	127868376	.	0	.
chr8	41459850	41460351	.	0	.
chr9	104099040	104099541	.	0	.
chr6	121412605	121413106	.	0	.
chr19	47696380	47696881	.	0	.
chr9	14363532	14364033	.	0	.
chr4	122008947	122009448	.	0	.
chr11	4946921	4947422	.	0	.
chr5	134142342	134142843	.	0	.
chr4	107977564	107978065	.	0	.
chr1	33838831	33839332	.	0	.
chr18	82881041	82881542	.	0	.
chr5	117823766	117824267	.	0	.
chr7	15978141	15978642	.	0	.
chr4	106606840	106607341	.	0	.
chr7	27273671	27274172	.	0	.
chr7	3573080	3573581	.	0	.
chr1	171437288	171437789	.	0	.
chr16	90150147	90150648	.	0	.
chr12	86688572	86689073	.	0	.
chr17	66379301	66379802	.	0	.
chr3	95140092	95140593	.	0	.
chr1	71812227	71812728	.	0	.
chr7	15986753	15987254	.	0	.
chr17	79133725	79134226	.	0	.
chr7	30453710	30454211	.	0	.
chr7	12749376	12749877	.	0	.
chr4	131450271	131450772	.	0	.
chr11	32614480	32614981	.	0	.
chr11	95875658	95876159	.	0	.
chr8	94172390	94172891	.	0	.
chr9	24624938	24625439	.	0	.
chr7	46376130	46376631	.	0	.
chr17	55482496	55482997	.	0	.
chr5	135432698	135433199	.	0	.
chr11	78358271	78358772	.	0	.
chr4	46620410	46620911	.	0	.
chr2	91044677	91045178	.	0	.
chr18	82828071	82828572	.	0	.
chr6	121413197	121413698	.	0	.
chr11	81241166	81241667	.	0	.
chr4	54854339	54854840	.	0	.
chr1	157726100	157726601	.	0	.
chr4	121052640	121053141	.	0	.
chr17	91088131	91088632	.	0	.
chr11	5059752	5060253	.	0	.
chr2	170788008	170788509	.	0	.
chr9	119828348	119828849	.	0	.
chr3	92824743	92825244	.	0	.
chr17	85595809	85596310	.	0	.
chr15	36573401	36573902	.	0	.
chr3	79299372	79299873	.	0	.
chr14	54956514	54957015	.	0	.
chr1	10294591	10295092	.	0	.
chr18	12599625	12600126	.	0	.
chr2	108785210	108785711	.	0	.
chr5	136052902	136053403	.	0	.
chr2	72667327	72667828	.	0	.
chr4	152115763	152116264	.	0	.
chr17	47042818	47043319	.	0	.
chr7	3685531	3686032	.	0	.
chr5	124943412	124943913	.	0	.
chr17	69996632	69997133	.	0	.
chr19	22139020	22139521	.	0	.
chr7	141924070	141924571	.	0	.
chr12	80721399	80721900	.	0	.
chr5	135494013	135494514	.	0	.
chr8	23682064	23682565	.	0	.
chr4	43421719	43422220	.	0	.
chr6	67534968	67535469	.	0	.
chr10	69008539	69009040	.	0	.
chr6	85125276	85125777	.	0	.
chr1	91911930	91912431	.	0	.
chr9	21346652	21347153	.	0	.
chr9	57681383	57681884	.	0	.
chr17	31870965	31871466	.	0	.
chr11	87404784	87405285	.	0	.
chr2	173118930	173119431	.	0	.
chr8	121213239	121213740	.	0	.
chr6	126501274	126501775	.	0	.
chr2	173119575	173120076	.	0	.
chr19	25505297	25505798	.	0	.
chr8	91691375	91691876	.	0	.
chr19	29066958	29067459	.	0	.
chrX	73096859	73097360	.	0	.
chr9	77556440	77556941	.	0	.
chr6	145478939	145479440	.	0	.
chr14	23169352	23169853	.	0	.
chr5	112382006	112382507	.	0	.
chr12	105063080	105063581	.	0	.
chr4	118692338	118692839	.	0	.
chr5	143129061	143129562	.	0	.
chr12	113872146	113872647	.	0	.
chr15	97255811	97256312	.	0	.
chr18	45146682	45147183	.	0	.
chr1	96799373	96799874	.	0	.
chr1	185533518	185534019	.	0	.
chr8	122564695	122565196	.	0	.
chr9	94655802	94656303	.	0	.
chr13	74440013	74440514	.	0	.
chr5	138280494	138280995	.	0	.
chr4	155361781	155362282	.	0	.
chr4	126998035	126998536	.	0	.
chr4	8965632	8966133	.	0	.
chr3	99500013	99500514	.	0	.
chr11	105955717	105956218	.	0	.
chr19	3942906	3943407	.	0	.
chr19	4720811	4721312	.	0	.
chr19	37252044	37252545	.	0	.
chr8	71602940	71603441	.	0	.
chr16	92498441	92498942	.	0	.
chr9	6601095	6601596	.	0	.
chr10	41751812	41752313	.	0	.
chr1	89891937	89892438	.	0	.
chr11	77917189	77917690	.	0	.
chr5	135669683	135670184	.	0	.
chr11	108941844	108942345	.	0	.
chr4	131695975	131696476	.	0	.
chr8	111031521	111032022	.	0	.
chr7	19054432	19054933	.	0	.
chr17	88362139	88362640	.	0	.
chr10	127114597	127115098	.	0	.
chr5	144457854	144458355	.	0	.
chr1	28622674	28623175	.	0	.
chr12	55860824	55861325	.	0	.
chr14	91768327	91768828	.	0	.
chr15	79964393	79964894	.	0	.
chr3	34759867	34760368	.	0	.
chr8	117436515	117437016	.	0	.
chr9	95560152	95560653	.	0	.
chrX	94998828	94999329	.	0	.
chr6	51395344	51395845	.	0	.
chr6	137846168	137846669	.	0	.
chr8	66511982	66512483	.	0	.
chr11	87763562	87764063	.	0	.
chr15	27754781	27755282	.	0	.
chr5	135042015	135042516	.	0	.
chr12	7859524	7860025	.	0	.
chr13	23933615	23934116	.	0	.
chr5	150593126	150593627	.	0	.
chr7	36046148	36046649	.	0	.
chr11	30198107	30198608	.	0	.
chr9	62281988	62282489	.	0	.
chr9	61013172	61013673	.	0	.
chr17	71010780	71011281	.	0	.
chr13	66807577	66808078	.	0	.
chr19	37362480	37362981	.	0	.
chr9	75232011	75232512	.	0	.
chr16	83175218	83175719	.	0	.
chr19	37692891	37693392	.	0	.
chr17	43454832	43455333	.	0	.
chr10	88717504	88718005	.	0	.
chr5	92042445	92042946	.	0	.
chr5	71332669	71333170	.	0	.
chr4	110397785	110398286	.	0	.
chr4	34049742	34050243	.	0	.
chr7	44230497	44230998	.	0	.
chr10	45613991	45614492	.	0	.
chr18	73963300	73963801	.	0	.
chr12	84593736	84594237	.	0	.
chr6	112472219	112472720	.	0	.
chr6	48064416	48064917	.	0	.
chr18	67740311	67740812	.	0	.
chr12	42167877	42168378	.	0	.
chr2	48316147	48316648	.	0	.
chr5	117348222	117348723	.	0	.
chr9	35147309	35147810	.	0	.
chr7	13043307	13043808	.	0	.
chr10	88456713	88457214	.	0	.
chr5	3732988	3733489	.	0	.
chr8	121844974	121845475	.	0	.
chr8	95593974	95594475	.	0	.
chrX	53757619	53758120	.	0	.
chr4	59914960	59915461	.	0	.
chr8	119722271	119722772	.	0	.
chr1	65388258	65388759	.	0	.
chr9	91655423	91655924	.	0	.
chr11	50796099	50796600	.	0	.
chr3	51590188	51590689	.	0	.
chr5	130016223	130016724	.	0	.
chr3	117322041	117322542	.	0	.
chr5	134536288	134536789	.	0	.
chr13	3139473	3139974	.	0	.
chr7	25891456	25891957	.	0	.
chr1	110360767	110361268	.	0	.
chr8	46386446	46386947	.	0	.
chr10	98537152	98537653	.	0	.
chr13	53800415	53800916	.	0	.
chr11	69477639	69478140	.	0	.
chr9	63953605	63954106	.	0	.
chr15	38238094	38238595	.	0	.
chr18	37089689	37090190	.	0	.
chr10	54955689	54956190	.	0	.
chr14	50624764	50625265	.	0	.
chr17	23575664	23576165	.	0	.
chr2	91030671	91031172	.	0	.
chr2	117708702	117709203	.	0	.
chr3	142210045	142210546	.	0	.
chr8	93796300	93796801	.	0	.
chr5	44271568	44272069	.	0	.
chr13	58732708	58733209	.	0	.
chr2	37786535	37787036	.	0	.
chr14	122490585	122491086	.	0	.
chr7	30034383	30034884	.	0	.
chr13	21936953	21937454	.	0	.
chr8	71634236	71634737	.	0	.
chr13	45917317	45917818	.	0	.
chr17	85932732	85933233	.	0	.
chr12	72198005	72198506	.	0	.
chr1	156073114	156073615	.	0	.
chr2	92370855	92371356	.	0	.
chr7	65466614	65467115	.	0	.
chr17	56117379	56117880	.	0	.
chr4	63171076	63171577	.	0	.
chr7	44670805	44671306	.	0	.
chr10	51677608	51678109	.	0	.
chr8	72197870	72198371	.	0	.
chr15	99780698	99781199	.	0	.
chr6	91153451	91153952	.	0	.
chr7	5008145	5008646	.	0	.
chr8	22701351	22701852	.	0	.
chr11	51219635	51220136	.	0	.
chr8	35183444	35183945	.	0	.
chr17	56241702	56242203	.	0	.
chr19	42059844	42060345	.	0	.
chr16	91891234	91891735	.	0	.
chr4	153097533	153098034	.	0	.
chr8	99416423	99416924	.	0	.
chr7	126291873	126292374	.	0	.
chr7	3181269	3181770	.	0	.
chr16	17121111	17121612	.	0	.
chr2	164430691	164431192	.	0	.
chr5	98453753	98454254	.	0	.
chr6	117249172	117249673	.	0	.
chr1	131003261	131003762	.	0	.
chr7	102113084	102113585	.	0	.
chr4	59162434	59162935	.	0	.
chr9	34981736	34982237	.	0	.
chr18	84670557	84671058	.	0	.
chr2	165716684	165717185	.	0	.
chr4	120396634	120397135	.	0	.
chr7	41451921	41452422	.	0	.
chr10	8835265	8835766	.	0	.
chr2	174120604	174121105	.	0	.
chr2	38647267	38647768	.	0	.
chr5	148371329	148371830	.	0	.
chr7	18950884	18951385	.	0	.
chr8	85091481	85091982	.	0	.
chr8	78213007	78213508	.	0	.
chr17	5472187	5472688	.	0	.
chr7	29067718	29068219	.	0	.
chr2	36093797	36094298	.	0	.
chr5	134118645	134119146	.	0	.
chr5	129214040	129214541	.	0	.
chr3	78006977	78007478	.	0	.
chr5	99839524	99840025	.	0	.
chr1	135918800	135919301	.	0	.
chr9	32872269	32872770	.	0	.
chr17	23605447	23605948	.	0	.
chr15	79212995	79213496	.	0	.
chr3	3297949	3298450	.	0	.
chr6	138657631	138658132	.	0	.
chr7	49400568	49401069	.	0	.
chr3	84445796	84446297	.	0	.
chr9	85791439	85791940	.	0	.
chr5	36869443	36869944	.	0	.
chr7	6044730	6045231	.	0	.
chr9	115628773	115629274	.	0	.
chr5	112848535	112849036	.	0	.
chr17	23843936	23844437	.	0	.
chr13	13964868	13965369	.	0	.
chr11	20459112	20459613	.	0	.
chr14	36055680	36056181	.	0	.
chr14	120830388	120830889	.	0	.
chr17	21967896	21968397	.	0	.
chr17	27177961	27178462	.	0	.
chr3	17999705	18000206	.	0	.
chr7	24538769	24539270	.	0	.
chr8	48228472	48228973	.	0	.
chrX	91313743	91314244	.	0	.
chrX	92029132	92029633	.	0	.
chr2	164938582	164939083	.	0	.
chr7	24736019	24736520	.	0	.
chr4	68954048	68954549	.	0	.
chr2	162948160	162948661	.	0	.
chr4	152084699	152085200	.	0	.
chr9	61052109	61052610	.	0	.
chr17	49206630	49207131	.	0	.
chr7	25422743	25423244	.	0	.
chr12	117151022	117151523	.	0	.
chr15	77857549	77858050	.	0	.
chr17	56540552	56541053	.	0	.
chr6	143688422	143688923	.	0	.
chr13	24743043	24743544	.	0	.
chr15	75646269	75646770	.	0	.
chr7	98682699	98683200	.	0	.
chr10	112270387	112270888	.	0	.
chr4	127199355	127199856	.	0	.
chr3	54633863	54634364	.	0	.
chr19	42291783	42292284	.	0	.
chr12	112599896	112600397	.	0	.
chr7	46477416	46477917	.	0	.
chr6	128645327	128645828	.	0	.
chr9	108431611	108432112	.	0	.
chr1	109983099	109983600	.	0	.
chr7	81476736	81477237	.	0	.
chr2	129253088	129253589	.	0	.
chr16	8792118	8792619	.	0	.
chr11	14599114	14599615	.	0	.
chr9	87015384	87015885	.	0	.
chr1	34929867	34930368	.	0	.
chr13	78024601	78025102	.	0	.
chr2	31551912	31552413	.	0	.
chr5	71547975	71548476	.	0	.
chr8	121541710	121542211	.	0	.
chr11	90002609	90003110	.	0	.
chr14	56100537	56101038	.	0	.
chr17	25819353	25819854	.	0	.
chr16	53984905	53985406	.	0	.
chr3	8881185	8881686	.	0	.
chr13	61771276	61771777	.	0	.
chr10	93846077	93846578	.	0	.
chr7	29162607	29163108	.	0	.
chr10	126826183	126826684	.	0	.
chr12	67221755	67222256	.	0	.
chr10	97692723	97693224	.	0	.
chr8	121570208	121570709	.	0	.
chr1	29484807	29485308	.	0	.
chr11	104287069	104287570	.	0	.
chr10	11410906	11411407	.	0	.
chr19	5696006	5696507	.	0	.
chr3	8739211	8739712	.	0	.
chr5	88112167	88112668	.	0	.
chr18	90579507	90580008	.	0	.
chr4	46833072	46833573	.	0	.
chr17	29531219	29531720	.	0	.
chr17	66683332	66683833	.	0	.
chr6	113184790	113185291	.	0	.
chr19	33761187	33761688	.	0	.
chr16	18347927	18348428	.	0	.
chr2	128872230	128872731	.	0	.
chr2	140773426	140773927	.	0	.
chr10	82974131	82974632	.	0	.
chr2	169132662	169133163	.	0	.
chr9	44256461	44256962	.	0	.
chr4	65613329	65613830	.	0	.
chr7	88430060	88430561	.	0	.
chr17	50209764	50210265	.	0	.
chr11	107686261	107686762	.	0	.
chr9	71831726	71832227	.	0	.
chr3	106051795	106052296	.	0	.
chr6	17098509	17099010	.	0	.
chr12	113716372	113716873	.	0	.
chr1	50900263	50900764	.	0	.
chr1	153414138	153414639	.	0	.
chr10	116114068	116114569	.	0	.
chr12	18387735	18388236	.	0	.
chr5	87850685	87851186	.	0	.
chr5	144761180	144761681	.	0	.
chr11	11769056	11769557	.	0	.
chr14	69989338	69989839	.	0	.
chr18	38504885	38505386	.	0	.
chr9	97922874	97923375	.	0	.
chr5	23122528	23123029	.	0	.
chr9	57997792	57998293	.	0	.
chr4	59382141	59382642	.	0	.
chr14	75823066	75823567	.	0	.
chr3	80800655	80801156	.	0	.
chr19	40893935	40894436	.	0	.
chr7	6132706	6133207	.	0	.
chr1	9848109	9848610	.	0	.
chr16	5352154	5352655	.	0	.
chr4	140327024	140327525	.	0	.
chr7	25601346	25601847	.	0	.
chr19	6428747	6429248	.	0	.
chr5	140546285	140546786	.	0	.
chr19	27323206	27323707	.	0	.
chr7	141060058	141060559	.	0	.
chr3	108150315	108150816	.	0	.
chr6	70716577	70717078	.	0	.
chr14	63193613	63194114	.	0	.
chr17	28858166	28858667	.	0	.
chr1	181860598	181861099	.	0	.
chr16	96135711	96136212	.	0	.
chr18	83325772	83326273	.	0	.
chr8	121220053	121220554	.	0	.
chr5	105480890	105481391	.	0	.
chr13	3866247	3866748	.	0	.
chr6	140680614	140681115	.	0	.
chr6	38676866	38677367	.	0	.
chr9	53884223	53884724	.	0	.
chr3	153475432	153475933	.	0	.
chr12	113796095	113796596	.	0	.
chr14	86204684	86205185	.	0	.
chr7	38221392	38221893	.	0	.
chr11	106020340	106020841	.	0	.
chr5	135468724	135469225	.	0	.
chr7	82348738	82349239	.	0	.
chr6	42261820	42262321	.	0	.
chr4	116518027	116518528	.	0	.
chr14	59025766	59026267	.	0	.
chrX	51800623	51801124	.	0	.
chr1	153101202	153101703	.	0	.
chr1	181923356	181923857	.	0	.
chr10	60125859	60126360	.	0	.
chr5	137736270	137736771	.	0	.
chr11	75531784	75532285	.	0	.
chr13	65237181	65237682	.	0	.
chr18	67291324	67291825	.	0	.
chr17	66008354	66008855	.	0	.
chr6	67532836	67533337	.	0	.
chr17	67480484	67480985	.	0	.
chr10	29196304	29196805	.	0	.
chr16	52123790	52124291	.	0	.
chr10	130412657	130413158	.	0	.
chr2	152391171	152391672	.	0	.
chr13	19265261	19265762	.	0	.
chr17	33601899	33602400	.	0	.
chr7	130812440	130812941	.	0	.
chr8	6842000	6842501	.	0	.
chr9	65371697	65372198	.	0	.
chr13	58070726	58071227	.	0	.
chr2	172979792	172980293	.	0	.
chr8	65046422	65046923	.	0	.
chr5	22724500	22725001	.	0	.
chr11	103773858	103774359	.	0	.
chr11	50233963	50234464	.	0	.
chr10	89443125	89443626	.	0	.
chr4	142640996	142641497	.	0	.
chr2	168767016	168767517	.	0	.
chr9	40772405	40772906	.	0	.
chr6	116173641	116174142	.	0	.
chr4	125218883	125219384	.	0	.
chr7	42877988	42878489	.	0	.
chr8	110895669	110896170	.	0	.
chr18	36274696	36275197	.	0	.
chr14	78037918	78038419	.	0	.
chr16	57280517	57281018	.	0	.
chr2	170142499	170143000	.	0	.
chr7	126427287	126427788	.	0	.
chr12	3825700	3826201	.	0	.
chr6	8951283	8951784	.	0	.
chr11	119007667	119008168	.	0	.
chr4	99209463	99209964	.	0	.
chr8	35101788	35102289	.	0	.
chr17	8388983	8389484	.	0	.
chr8	27120807	27121308	.	0	.
chr14	54492273	54492774	.	0	.
chr4	153602424	153602925	.	0	.
chr9	21220372	21220873	.	0	.
chr17	78591682	78592183	.	0	.
chr14	66009010	66009511	.	0	.
chr2	112000914	112001415	.	0	.
chr4	83254907	83255408	.	0	.
chr5	66675915	66676416	.	0	.
chr2	82943577	82944078	.	0	.
chr9	25400888	25401389	.	0	.
chr15	78003853	78004354	.	0	.
chr12	91778978	91779479	.	0	.
chr19	25302002	25302503	.	0	.
chr7	25777070	25777571	.	0	.
chr1	161142446	161142947	.	0	.
chr12	105592216	105592717	.	0	.
chr19	44487225	44487726	.	0	.
chr5	113472318	113472819	.	0	.
chr14	19311071	19311572	.	0	.
chr5	128569179	128569680	.	0	.
chr7	29214803	29215304	.	0	.
chr7	118042957	118043458	.	0	.
chr19	42201382	42201883	.	0	.
chr15	97126176	97126677	.	0	.
chr17	32702647	32703148	.	0	.
chr6	141075282	141075783	.	0	.
chr13	25192889	25193390	.	0	.
chr8	91196566	91197067	.	0	.
chr6	38677605	38678106	.	0	.
chr11	4118558	4119059	.	0	.
chr13	12261866	12262367	.	0	.
chr10	47426304	47426805	.	0	.
chr6	29402639	29403140	.	0	.
chr6	72921155	72921656	.	0	.
chr8	88627616	88628117	.	0	.
chr13	96528046	96528547	.	0	.
chr14	34106599	34107100	.	0	.
chr14	103649992	103650493	.	0	.
chr5	112686210	112686711	.	0	.
chr2	32132505	32133006	.	0	.
chr6	149361385	149361886	.	0	.
chr2	25846965	25847466	.	0	.
chr2	173938503	173939004	.	0	.
chr2	157021085	157021586	.	0	.
chr13	117220376	117220877	.	0	.
chr15	74487239	74487740	.	0	.
chr5	35280389	35280890	.	0	.
chr10	35037416	35037917	.	0	.
chr7	141361508	141362009	.	0	.
chr6	135078450	135078951	.	0	.
chr9	96520827	96521328	.	0	.
chr4	151881435	151881936	.	0	.
chr2	160957594	160958095	.	0	.
chr7	81077573	81078074	.	0	.
chr1	10694905	10695406	.	0	.
chr1	134164591	134165092	.	0	.
chr1	153680288	153680789	.	0	.
chr1	184697626	184698127	.	0	.
chr15	3303076	3303577	.	0	.
chr17	36215913	36216414	.	0	.
chr19	57942082	57942583	.	0	.
chr4	84022279	84022780	.	0	.
chr5	109922542	109923043	.	0	.
chr6	124552773	124553274	.	0	.
chr7	142969167	142969668	.	0	.
chr8	110290552	110291053	.	0	.
chrX	38121400	38121901	.	0	.
chrX	147789611	147790112	.	0	.
chr3	88643219	88643720	.	0	.
chr7	19222548	19223049	.	0	.
chr10	42197353	42197854	.	0	.
chr12	110976895	110977396	.	0	.
chr14	30699589	30700090	.	0	.
chr4	115917960	115918461	.	0	.
chr6	48395331	48395832	.	0	.
chr5	112552734	112553235	.	0	.
chr15	100324092	100324593	.	0	.
chr4	106639100	106639601	.	0	.
chr18	37822410	37822911	.	0	.
chr4	124862129	124862630	.	0	.
chr1	130877995	130878496	.	0	.
chr18	69152703	69153204	.	0	.
chr17	27333514	27334015	.	0	.
chr9	114663774	114664275	.	0	.
chr9	42833601	42834102	.	0	.
chr8	110479320	110479821	.	0	.
chr5	148288800	148289301	.	0	.
chr7	3198814	3199315	.	0	.
chr18	83358450	83358951	.	0	.
chr6	85895156	85895657	.	0	.
chr18	76035032	76035533	.	0	.
chr1	178299266	178299767	.	0	.
chr4	154334654	154335155	.	0	.
chr6	67205565	67206066	.	0	.
chr7	64036097	64036598	.	0	.
chr7	18828018	18828519	.	0	.
chr9	95845055	95845556	.	0	.
chr1	85724492	85724993	.	0	.
chr12	20815587	20816088	.	0	.
chr9	77385395	77385896	.	0	.
chr7	107757716	107758217	.	0	.
chr11	3834251	3834752	.	0	.
chr7	63877540	63878041	.	0	.
chr10	44148596	44149097	.	0	.
chr8	8334555	8335056	.	0	.
chr2	91635240	91635741	.	0	.
chr5	143287704	143288205	.	0	.
chr2	165547349	165547850	.	0	.
chr7	84528991	84529492	.	0	.
chr5	6049259	6049760	.	0	.
chr19	11877771	11878272	.	0	.
chr11	61683787	61684288	.	0	.
chr17	49196836	49197337	.	0	.
chr11	116586734	116587235	.	0	.
chr2	3375352	3375853	.	0	.
chr9	97133128	97133629	.	0	.
chr4	150147171	150147672	.	0	.
chr10	72551497	72551998	.	0	.
chr11	58751083	58751584	.	0	.
chr4	26718377	26718878	.	0	.
chr17	35520914	35521415	.	0	.
chr1	189070023	189070524	.	0	.
chr2	164047353	164047854	.	0	.
chr1	152274949	152275450	.	0	.
chr4	33265259	33265760	.	0	.
chr11	22971953	22972454	.	0	.
chr7	16212671	16213172	.	0	.
chr14	87123013	87123514	.	0	.
chr17	83224632	83225133	.	0	.
chr14	121447009	121447510	.	0	.
chr10	111782357	111782858	.	0	.
chr10	71381222	71381723	.	0	.
chr15	97369099	97369600	.	0	.
chr7	41320298	41320799	.	0	.
chr10	21593110	21593611	.	0	.
chr1	184557474	184557975	.	0	.
chrX	74968893	74969394	.	0	.
chr8	95848196	95848697	.	0	.
chr2	168402758	168403259	.	0	.
chr10	120061124	120061625	.	0	.
chr1	183423441	183423942	.	0	.
chr6	99062626	99063127	.	0	.
chr3	158160493	158160994	.	0	.
chr1	42695437	42695938	.	0	.
chr4	119170381	119170882	.	0	.
chr17	67869645	67870146	.	0	.
chr7	44614012	44614513	.	0	.
chr10	97693442	97693943	.	0	.
chr3	32764710	32765211	.	0	.
chr6	38926070	38926571	.	0	.
chr8	40650172	40650673	.	0	.
chr1	136706798	136707299	.	0	.
chr10	88135416	88135917	.	0	.
chr11	103795290	103795791	.	0	.
chr13	66487936	66488437	.	0	.
chr19	40276299	40276800	.	0	.
chr19	54192672	54193173	.	0	.
chr7	17133034	17133535	.	0	.
chr7	43113896	43114397	.	0	.
chr7	45986243	45986744	.	0	.
chr8	118618743	118619244	.	0	.
chr8	119625817	119626318	.	0	.
chr2	75977885	75978386	.	0	.
chr3	86546862	86547363	.	0	.
chr17	57302116	57302617	.	0	.
chr1	80184389	80184890	.	0	.
chr10	42930257	42930758	.	0	.
chr1	23935038	23935539	.	0	.
chr12	85150766	85151267	.	0	.
chr7	19175579	19176080	.	0	.
chr2	119277780	119278281	.	0	.
chr1	9908979	9909480	.	0	.
chr15	96235959	96236460	.	0	.
chr2	84815513	84816014	.	0	.
chr9	64918478	64918979	.	0	.
chr2	33975673	33976174	.	0	.
chr7	25891984	25892485	.	0	.
chr13	28929938	28930439	.	0	.
chr6	4190984	4191485	.	0	.
chr8	119632804	119633305	.	0	.
chr4	93334518	93335019	.	0	.
chr5	52128672	52129173	.	0	.
chr4	151901364	151901865	.	0	.
chr2	98106763	98107264	.	0	.
chr4	135403990	135404491	.	0	.
chr11	49958006	49958507	.	0	.
chr11	101720135	101720636	.	0	.
chr7	34774889	34775390	.	0	.
chr10	18213288	18213789	.	0	.
chr9	15937722	15938223	.	0	.
chr7	35401139	35401640	.	0	.
chr8	111889971	111890472	.	0	.
chr18	73608788	73609289	.	0	.
chr7	105433823	105434324	.	0	.
chr13	8569827	8570328	.	0	.
chr10	112743868	112744369	.	0	.
chr18	24652539	24653040	.	0	.
chr3	83836568	83837069	.	0	.
chr5	73238020	73238521	.	0	.
chr7	97919700	97920201	.	0	.
chr4	140507114	140507615	.	0	.
chr11	31940848	31941349	.	0	.
chr6	71527592	71528093	.	0	.
chr6	143129451	143129952	.	0	.
chrX	148877346	148877847	.	0	.
chr6	148354399	148354900	.	0	.
chr17	20378725	20379226	.	0	.
chr8	5080094	5080595	.	0	.
chr11	93982487	93982988	.	0	.
chr17	36167259	36167760	.	0	.
chr2	39483381	39483882	.	0	.
chr16	91269386	91269887	.	0	.
chr13	23270262	23270763	.	0	.
chr1	35850148	35850649	.	0	.
chr7	30810534	30811035	.	0	.
chr2	119236971	119237472	.	0	.
chr8	111890478	111890979	.	0	.
chr5	118481239	118481740	.	0	.
chr7	107166647	107167148	.	0	.
chr4	95075679	95076180	.	0	.
chrX	159541447	159541948	.	0	.
chr12	3387844	3388345	.	0	.
chr6	67535503	67536004	.	0	.
chr15	82298460	82298961	.	0	.
chr13	49814391	49814892	.	0	.
chrX	56212680	56213181	.	0	.
chr10	61605331	61605832	.	0	.
chr7	24534161	24534662	.	0	.
chr2	69766033	69766534	.	0	.
chr5	135353477	135353978	.	0	.
chr5	106561140	106561641	.	0	.
chr9	75382708	75383209	.	0	.
chr6	137146862	137147363	.	0	.
chr11	49636413	49636914	.	0	.
chr13	42183505	42184006	.	0	.
chr13	76064312	76064813	.	0	.
chr14	87280883	87281384	.	0	.
chr15	80947139	80947640	.	0	.
chr2	26582124	26582625	.	0	.
chr7	19884605	19885106	.	0	.
chr8	47798592	47799093	.	0	.
chr2	162998895	162999396	.	0	.
chr16	94010531	94011032	.	0	.
chr1	43511257	43511758	.	0	.
chr1	12865048	12865549	.	0	.
chr5	148313358	148313859	.	0	.
chr18	61701897	61702398	.	0	.
chr8	110152651	110153152	.	0	.
chr7	128060389	128060890	.	0	.
chr4	144588018	144588519	.	0	.
chr13	58843560	58844061	.	0	.
chr16	85079976	85080477	.	0	.
chr19	56825974	56826475	.	0	.
chr9	20681833	20682334	.	0	.
chr7	6514697	6515198	.	0	.
chr8	53612208	53612709	.	0	.
chr11	103749669	103750170	.	0	.
chr16	81704768	81705269	.	0	.
chr1	15883530	15884031	.	0	.
chr7	46201599	46202100	.	0	.
chr3	153662709	153663210	.	0	.
chr8	106633289	106633790	.	0	.
chr9	35574280	35574781	.	0	.
chr6	127614599	127615100	.	0	.
chr11	114281060	114281561	.	0	.
chr2	59843178	59843679	.	0	.
chr7	16061329	16061830	.	0	.
chr4	133352753	133353254	.	0	.
chr5	146227496	146227997	.	0	.
chr8	91692290	91692791	.	0	.
chr11	78322812	78323313	.	0	.
chr12	59039852	59040353	.	0	.
chr15	7132556	7133057	.	0	.
chr1	189581765	189582266	.	0	.
chr12	33053693	33054194	.	0	.
chr10	116113473	116113974	.	0	.
chr3	153348920	153349421	.	0	.
chr14	54950363	54950864	.	0	.
chr19	42812761	42813262	.	0	.
chr5	118236815	118237316	.	0	.
chr9	56620461	56620962	.	0	.
chr8	117589965	117590466	.	0	.
chr2	59749367	59749868	.	0	.
chr12	57685004	57685505	.	0	.
chr5	137584522	137585023	.	0	.
chr7	19176091	19176592	.	0	.
chr1	181880851	181881352	.	0	.
chr1	88795471	88795972	.	0	.
chr12	105063693	105064194	.	0	.
chr13	60425524	60426025	.	0	.
chr3	55182438	55182939	.	0	.
chr8	4205410	4205911	.	0	.
chr13	76345836	76346337	.	0	.
chr8	117658316	117658817	.	0	.
chr8	71602402	71602903	.	0	.
chr5	64797366	64797867	.	0	.
chr14	54698484	54698985	.	0	.
chr4	151895578	151896079	.	0	.
chr3	50217779	50218280	.	0	.
chr6	45060109	45060610	.	0	.
chr10	60539162	60539663	.	0	.
chr5	137190613	137191114	.	0	.
chr8	104218528	104219029	.	0	.
chr7	29555019	29555520	.	0	.
chr6	30174001	30174502	.	0	.
chr2	77313754	77314255	.	0	.
chr13	111919345	111919846	.	0	.
chr7	15972166	15972667	.	0	.
chr10	126592031	126592532	.	0	.
chr5	132766240	132766741	.	0	.
chr12	76981715	76982216	.	0	.
chr2	168262636	168263137	.	0	.
chr12	84876664	84877165	.	0	.
chr11	11684834	11685335	.	0	.
chr5	134410473	134410974	.	0	.
chr1	181845135	181845636	.	0	.
chr14	24081851	24082352	.	0	.
chr8	31175987	31176488	.	0	.
chr13	56899960	56900461	.	0	.
chr7	36016834	36017335	.	0	.
chr11	81968448	81968949	.	0	.
chr8	45561385	45561886	.	0	.
chr6	35329422	35329923	.	0	.
chrX	58030263	58030764	.	0	.
chr9	97365683	97366184	.	0	.
chr7	45693955	45694456	.	0	.
chr4	43653361	43653862	.	0	.
chr2	4087622	4088123	.	0	.
chr1	39404082	39404583	.	0	.
chr11	54355573	54356074	.	0	.
chr3	114903988	114904489	.	0	.
chr4	56740875	56741376	.	0	.
chr17	17303456	17303957	.	0	.
chr17	31057447	31057948	.	0	.
chr13	70007251	70007752	.	0	.
chr12	51994997	51995498	.	0	.
chr8	17535451	17535952	.	0	.
chr5	112999299	112999800	.	0	.
chr11	23846387	23846888	.	0	.
chr3	94484978	94485479	.	0	.
chr10	40425457	40425958	.	0	.
chr11	113874704	113875205	.	0	.
chr14	33955443	33955944	.	0	.
chr14	36801860	36802361	.	0	.
chr19	58118392	58118893	.	0	.
chr2	40118929	40119430	.	0	.
chr2	144393415	144393916	.	0	.
chr3	41492964	41493465	.	0	.
chr8	22620214	22620715	.	0	.
chr8	53686637	53687138	.	0	.
chr8	54616780	54617281	.	0	.
chr8	106674244	106674745	.	0	.
chr9	79342322	79342823	.	0	.
chrX	68921298	68921799	.	0	.
chr5	147408656	147409157	.	0	.
chr10	128715495	128715996	.	0	.
chr16	14906356	14906857	.	0	.
chr7	5030682	5031183	.	0	.
chr1	33637827	33638328	.	0	.
chr16	35645444	35645945	.	0	.
chr6	56652200	56652701	.	0	.
chr9	121797706	121798207	.	0	.
chr3	53233544	53234045	.	0	.
chr7	88130130	88130631	.	0	.
chr8	117028620	117029121	.	0	.
chr5	29467665	29468166	.	0	.
chr3	26697763	26698264	.	0	.
chr2	168311014	168311515	.	0	.
chr4	153827966	153828467	.	0	.
chr1	182777861	182778362	.	0	.
chr9	102478955	102479456	.	0	.
chr16	91905487	91905988	.	0	.
chr2	98980447	98980948	.	0	.
chr12	84650247	84650748	.	0	.
chr10	60186169	60186670	.	0	.
chr7	84779101	84779602	.	0	.
chr6	71021305	71021806	.	0	.
chr13	11738007	11738508	.	0	.
chr5	127632217	127632718	.	0	.
chr12	118529896	118530397	.	0	.
chr19	23956504	23957005	.	0	.
chr5	113693267	113693768	.	0	.
chr9	103557050	103557551	.	0	.
chr13	29956917	29957418	.	0	.
chr3	100704186	100704687	.	0	.
chr7	51627000	51627501	.	0	.
chr3	75164804	75165305	.	0	.
chr1	175978670	175979171	.	0	.
chr15	83512425	83512926	.	0	.
chr4	141672261	141672762	.	0	.
chr14	99475190	99475691	.	0	.
chr14	112012130	112012631	.	0	.
chr16	89477941	89478442	.	0	.
chr14	34591262	34591763	.	0	.
chr10	63886325	63886826	.	0	.
chr14	76425928	76426429	.	0	.
chr15	27747446	27747947	.	0	.
chr1	167445874	167446375	.	0	.
chr13	12340530	12341031	.	0	.
chr1	34723627	34724128	.	0	.
chr13	97520958	97521459	.	0	.
chr8	70433049	70433550	.	0	.
chr5	104770091	104770592	.	0	.
chr8	34372279	34372780	.	0	.
chr4	130975311	130975812	.	0	.
chr9	81632307	81632808	.	0	.
chr2	32751257	32751758	.	0	.
chr5	129854504	129855005	.	0	.
chr6	43309369	43309870	.	0	.
chr1	182747811	182748312	.	0	.
chr14	37057134	37057635	.	0	.
chr10	100128335	100128836	.	0	.
chr4	141433187	141433688	.	0	.
chr2	164413826	164414327	.	0	.
chr8	95328528	95329029	.	0	.
chr18	83359053	83359554	.	0	.
chr12	103640052	103640553	.	0	.
chrX	60893558	60894059	.	0	.
chr3	89667052	89667553	.	0	.
chr17	27671420	27671921	.	0	.
chr2	13283009	13283510	.	0	.
chr13	95336317	95336818	.	0	.
chr1	9298999	9299500	.	0	.
chr16	22931346	22931847	.	0	.
chr1	52431798	52432299	.	0	.
chr4	135306972	135307473	.	0	.
chr14	66950775	66951276	.	0	.
chr2	24474832	24475333	.	0	.
chr3	24691927	24692428	.	0	.
chr2	18698834	18699335	.	0	.
chr4	45868993	45869494	.	0	.
chr7	66334025	66334526	.	0	.
chr8	94183146	94183647	.	0	.
chr19	4042073	4042574	.	0	.
chr4	21873579	21874080	.	0	.
chr11	4035284	4035785	.	0	.
chr14	118175131	118175632	.	0	.
chr10	14131838	14132339	.	0	.
chr1	40055251	40055752	.	0	.
chr17	73031834	73032335	.	0	.
chr10	120135865	120136366	.	0	.
chr13	8386407	8386908	.	0	.
chr7	19764270	19764771	.	0	.
chr14	52313883	52314384	.	0	.
chr16	93974721	93975222	.	0	.
chr4	23657055	23657556	.	0	.
chr3	10342505	10343006	.	0	.
chr11	82163235	82163736	.	0	.
chr5	63862064	63862565	.	0	.
chr6	22402666	22403167	.	0	.
chr7	63544104	63544605	.	0	.
chrX	42489442	42489943	.	0	.
chrX	157568772	157569273	.	0	.
chr16	17807404	17807905	.	0	.
chr10	44038131	44038632	.	0	.
chr14	33965852	33966353	.	0	.
chr4	139850720	139851221	.	0	.
chr2	25095487	25095988	.	0	.
chr1	4688071	4688572	.	0	.
chr1	134290076	134290577	.	0	.
chr10	39590049	39590550	.	0	.
chr1	83003786	83004287	.	0	.
chr2	11293339	11293840	.	0	.
chr8	68461034	68461535	.	0	.
chr2	42652677	42653178	.	0	.
chr5	147299601	147300102	.	0	.
chr1	55171846	55172347	.	0	.
chr19	43504536	43505037	.	0	.
chr12	80720695	80721196	.	0	.
chr11	33934194	33934695	.	0	.
chr11	45991511	45992012	.	0	.
chr2	158539617	158540118	.	0	.
chr19	40872692	40873193	.	0	.
chr7	128270465	128270966	.	0	.
chr17	29981515	29982016	.	0	.
chr8	70565615	70566116	.	0	.
chr7	24117925	24118426	.	0	.
chr9	84017928	84018429	.	0	.
chr7	119512780	119513281	.	0	.
chr2	60693536	60694037	.	0	.
chr11	54806811	54807312	.	0	.
chr5	117125646	117126147	.	0	.
chr15	25835041	25835542	.	0	.
chr3	145968917	145969418	.	0	.
chr17	26431884	26432385	.	0	.
chr2	172550349	172550850	.	0	.
chr6	35269594	35270095	.	0	.
chr5	114826150	114826651	.	0	.
chr16	88289315	88289816	.	0	.
chr13	94877090	94877591	.	0	.
chr14	111077763	111078264	.	0	.
chr1	181852990	181853491	.	0	.
chr14	62580902	62581403	.	0	.
chr13	91723582	91724083	.	0	.
chr18	61697259	61697760	.	0	.
chr6	48098556	48099057	.	0	.
chr5	134107104	134107605	.	0	.
chr9	22300147	22300648	.	0	.
chr13	57589341	57589842	.	0	.
chr2	69639944	69640445	.	0	.
chr3	33905022	33905523	.	0	.
chr7	131182595	131183096	.	0	.
chr2	168807581	168808082	.	0	.
chr5	136686748	136687249	.	0	.
chr13	51743785	51744286	.	0	.
chr3	104327250	104327751	.	0	.
chr12	18514948	18515449	.	0	.
chr13	6791868	6792369	.	0	.
chr2	103810434	103810935	.	0	.
chr7	25699850	25700351	.	0	.
chr10	19356909	19357410	.	0	.
chr1	17482910	17483411	.	0	.
chr16	88647227	88647728	.	0	.
chr3	5161656	5162157	.	0	.
chr5	136095790	136096291	.	0	.
chr16	17144239	17144740	.	0	.
chr11	105164450	105164951	.	0	.
chrX	103404910	103405411	.	0	.
chr14	101477245	101477746	.	0	.
chr5	96119667	96120168	.	0	.
chr4	121231093	121231594	.	0	.
chr9	120893415	120893916	.	0	.
chr15	101092961	101093462	.	0	.
chr16	55905192	55905693	.	0	.
chr12	4720173	4720674	.	0	.
chr12	21777913	21778414	.	0	.
chr18	75412084	75412585	.	0	.
chr7	25619134	25619635	.	0	.
chr7	25109886	25110387	.	0	.
chr8	40634379	40634880	.	0	.
chr3	107460036	107460537	.	0	.
chr10	12883356	12883857	.	0	.
chr3	108151014	108151515	.	0	.
chr2	174295237	174295738	.	0	.
chr10	14760131	14760632	.	0	.
chr10	67909159	67909660	.	0	.
chr14	60086619	60087120	.	0	.
chr13	84862571	84863072	.	0	.
chr15	91735156	91735657	.	0	.
chr18	82391265	82391766	.	0	.
chr14	34769561	34770062	.	0	.
chr17	24657978	24658479	.	0	.
chr6	71374103	71374604	.	0	.
chr4	59914176	59914677	.	0	.
chr1	33621761	33622262	.	0	.
chr14	54631814	54632315	.	0	.
chrX	147774856	147775357	.	0	.
chr8	3678849	3679350	.	0	.
chr9	102924916	102925417	.	0	.
chr11	83175041	83175542	.	0	.
chr9	98107133	98107634	.	0	.
chr6	54326558	54327059	.	0	.
chr14	27335732	27336233	.	0	.
chr9	108392728	108393229	.	0	.
chr7	119476489	119476990	.	0	.
chr17	84126908	84127409	.	0	.
chr4	9774733	9775234	.	0	.
chr2	165398109	165398610	.	0	.
chr3	106672820	106673321	.	0	.
chr2	32742191	32742692	.	0	.
chr19	59153998	59154499	.	0	.
chr14	75396459	75396960	.	0	.
chr1	37614067	37614568	.	0	.
chr1	166100329	166100830	.	0	.
chr5	81329634	81330135	.	0	.
chr1	8859152	8859653	.	0	.
chr8	72749915	72750416	.	0	.
chr6	86003422	86003923	.	0	.
chr6	112361725	112362226	.	0	.
chr13	3138671	3139172	.	0	.
chr1	96733335	96733836	.	0	.
chr7	122467846	122468347	.	0	.
chr17	80063879	80064380	.	0	.
chr13	65175856	65176357	.	0	.
chr15	84766541	84767042	.	0	.
chr8	94186450	94186951	.	0	.
chr7	34546579	34547080	.	0	.
chr1	190125257	190125758	.	0	.
chr17	78872725	78873226	.	0	.
chr4	43421217	43421718	.	0	.
chr10	52319439	52319940	.	0	.
chr10	11555311	11555812	.	0	.
chr13	62145822	62146323	.	0	.
chr13	66519371	66519872	.	0	.
chr13	66680644	66681145	.	0	.
chr2	171059062	171059563	.	0	.
chr3	16527359	16527860	.	0	.
chr4	4432690	4433191	.	0	.
chr4	59753330	59753831	.	0	.
chr4	85283142	85283643	.	0	.
chr7	44606067	44606568	.	0	.
chr9	90171233	90171734	.	0	.
chr5	130449448	130449949	.	0	.
chr5	109550505	109551006	.	0	.
chr5	109554172	109554673	.	0	.
chr13	24906079	24906580	.	0	.
chr4	124418282	124418783	.	0	.
chr4	148830285	148830786	.	0	.
chr2	49375004	49375505	.	0	.
chr11	120297724	120298225	.	0	.
chr4	86734060	86734561	.	0	.
chr10	41380304	41380805	.	0	.
chr9	16548366	16548867	.	0	.
chr1	184832182	184832683	.	0	.
chr8	110949962	110950463	.	0	.
chr2	173522405	173522906	.	0	.
chr5	116221839	116222340	.	0	.
chr6	37686252	37686753	.	0	.
chr8	119466153	119466654	.	0	.
chr2	178501816	178502317	.	0	.
chr4	45591927	45592428	.	0	.
chr4	131240410	131240911	.	0	.
chr5	37163100	37163601	.	0	.
chr3	82297624	82298125	.	0	.
chr17	28895478	28895979	.	0	.
chr16	18776498	18776999	.	0	.
chr17	87968544	87969045	.	0	.
chr10	60780211	60780712	.	0	.
chr8	35160205	35160706	.	0	.
chr4	116840033	116840534	.	0	.
chr6	90550489	90550990	.	0	.
chr7	62348622	62349123	.	0	.
chr7	16046015	16046516	.	0	.
chr6	48438732	48439233	.	0	.
chr16	44501389	44501890	.	0	.
[truncated: 42,461 more rows]

## Sheet: Sertoli.DAR
chr7	44670805	44671306	.	0	.
chr4	141866849	141867350	.	0	.
chr1	119388987	119389488	.	0	.
chr10	75556004	75556505	.	0	.
chr8	125909867	125910368	.	0	.
chr11	116104105	116104606	.	0	.
chr10	77229508	77230009	.	0	.
chr18	61952794	61953295	.	0	.
chr12	113032539	113033040	.	0	.
chr6	113860356	113860857	.	0	.
chr5	35073970	35074471	.	0	.
chr12	12810067	12810568	.	0	.
chr2	25145238	25145739	.	0	.
chr18	70052873	70053374	.	0	.
chr11	33142863	33143364	.	0	.
chr8	92846635	92847136	.	0	.
chr16	92346190	92346691	.	0	.
chr5	139803982	139804483	.	0	.
chr18	35844788	35845289	.	0	.
chr14	63164583	63165084	.	0	.
chr6	55470618	55471119	.	0	.
chr11	98966551	98967052	.	0	.
chr15	76456055	76456556	.	0	.
chr4	49041693	49042194	.	0	.
chr2	152000882	152001383	.	0	.
chr1	69105856	69106357	.	0	.
chr15	75720666	75721167	.	0	.
chr8	111726502	111727003	.	0	.
chr18	36328564	36329065	.	0	.
chr7	28894884	28895385	.	0	.
chr14	31212456	31212957	.	0	.
chr8	111716590	111717091	.	0	.
chr14	66816795	66817296	.	0	.
chr4	141867413	141867914	.	0	.
chr6	127500085	127500586	.	0	.
chr8	122234050	122234551	.	0	.
chr10	77151538	77152039	.	0	.
chr12	106008374	106008875	.	0	.
chr19	16955719	16956220	.	0	.
chr2	164432683	164433184	.	0	.
chr7	117510182	117510683	.	0	.
chr17	66405146	66405647	.	0	.
chr14	34620628	34621129	.	0	.
chr16	30964872	30965373	.	0	.
chr4	138819022	138819523	.	0	.
chr14	54572691	54573192	.	0	.
chr3	107931530	107932031	.	0	.
chr2	32559638	32560139	.	0	.
chr18	34841489	34841990	.	0	.
chr4	148066203	148066704	.	0	.
chr10	79937032	79937533	.	0	.
chr13	38170557	38171058	.	0	.
chr5	125202975	125203476	.	0	.
chr6	83197268	83197769	.	0	.
chr10	80804906	80805407	.	0	.
chr15	80053898	80054399	.	0	.
chr5	36414666	36415167	.	0	.
chr8	71572763	71573264	.	0	.
chr17	47762892	47763393	.	0	.
chr10	77230102	77230603	.	0	.
chr6	89351351	89351852	.	0	.
chr4	133095092	133095593	.	0	.
chr5	120643670	120644171	.	0	.
chr8	92847202	92847703	.	0	.
chr1	75398784	75399285	.	0	.
chr3	142957768	142958269	.	0	.
chr17	35141875	35142376	.	0	.
chr17	27999833	28000334	.	0	.
chr7	49605270	49605771	.	0	.
chr19	4477834	4478335	.	0	.
chr11	52919454	52919955	.	0	.
chr2	157873128	157873629	.	0	.
chr3	100439606	100440107	.	0	.
chr7	45712304	45712805	.	0	.
chr14	63054620	63055121	.	0	.
chr15	102002837	102003338	.	0	.
chr2	153436495	153436996	.	0	.
chr7	144449551	144450052	.	0	.
chr11	116661815	116662316	.	0	.
chr18	76035032	76035533	.	0	.
chr5	125175277	125175778	.	0	.
chr8	115650012	115650513	.	0	.
chr7	144438784	144439285	.	0	.
chr1	133364812	133365313	.	0	.
chr7	122219197	122219698	.	0	.
chr14	25587557	25588058	.	0	.
chr14	60741414	60741915	.	0	.
chr14	63067673	63068174	.	0	.
chr1	87273586	87274087	.	0	.
chr17	29902731	29903232	.	0	.
chr2	172045913	172046414	.	0	.
chr11	77893961	77894462	.	0	.
chr1	120265043	120265544	.	0	.
chr17	65681998	65682499	.	0	.
chr17	35720314	35720815	.	0	.
chr10	79774435	79774936	.	0	.
chr2	103706208	103706709	.	0	.
chr14	63321969	63322470	.	0	.
chr1	133367731	133368232	.	0	.
chr15	98895843	98896344	.	0	.
chr6	89350139	89350640	.	0	.
chr2	180173620	180174121	.	0	.
chr12	84285010	84285511	.	0	.
chr14	25585745	25586246	.	0	.
chr7	139364042	139364543	.	0	.
chr14	25371581	25372082	.	0	.
chr6	89348425	89348926	.	0	.
chr11	98393212	98393713	.	0	.
chr5	117687709	117688210	.	0	.
chr13	49178762	49179263	.	0	.
chr4	33261231	33261732	.	0	.
chr14	70203364	70203865	.	0	.
chr9	88327318	88327819	.	0	.
chr4	110050773	110051274	.	0	.
chr8	13506767	13507268	.	0	.
chr11	77836621	77837122	.	0	.
chr9	63941655	63942156	.	0	.
chr1	4722591	4723092	.	0	.
chr6	114888951	114889452	.	0	.
chr2	167828187	167828688	.	0	.
chr9	108274596	108275097	.	0	.
chr2	35720094	35720595	.	0	.
chr4	95966938	95967439	.	0	.
chr11	112849980	112850481	.	0	.
chr14	31393883	31394384	.	0	.
chr15	79951922	79952423	.	0	.
chr2	158741078	158741579	.	0	.
chr5	135108030	135108531	.	0	.
chr12	102271332	102271833	.	0	.
chr9	111311205	111311706	.	0	.
chr14	7791438	7791939	.	0	.
chr8	110931493	110931994	.	0	.
chr2	37788173	37788674	.	0	.
chr14	65968347	65968848	.	0	.
chr4	130175087	130175588	.	0	.
chr2	50687198	50687699	.	0	.
chr5	24320382	24320883	.	0	.
chr7	45056646	45057147	.	0	.
chr1	119413172	119413673	.	0	.
chr12	86790583	86791084	.	0	.
chr4	133563080	133563581	.	0	.
chr4	58995126	58995627	.	0	.
chr3	66292256	66292757	.	0	.
chr12	81140829	81141330	.	0	.
chr7	67714074	67714575	.	0	.
chr11	55423652	55424153	.	0	.
chr6	89339406	89339907	.	0	.
chr10	116996125	116996626	.	0	.
chr7	130910697	130911198	.	0	.
chr11	88164592	88165093	.	0	.
chr11	22800017	22800518	.	0	.
chr15	99501704	99502205	.	0	.
chr16	92103610	92104111	.	0	.
chr17	71810932	71811433	.	0	.
chr1	89108274	89108775	.	0	.
chr9	57949012	57949513	.	0	.
chr17	12128884	12129385	.	0	.
chr16	4603000	4603501	.	0	.
chr6	147145123	147145624	.	0	.
chr2	168094953	168095454	.	0	.
chr5	148632357	148632858	.	0	.
chr7	96796893	96797394	.	0	.
chr8	122666416	122666917	.	0	.
chr8	111746757	111747258	.	0	.
chr7	80208778	80209279	.	0	.
chr14	66824071	66824572	.	0	.
chr17	84026088	84026589	.	0	.
chr2	156015965	156016466	.	0	.
chr2	156737863	156738364	.	0	.
chr4	139967361	139967862	.	0	.
chr7	19495433	19495934	.	0	.
chr11	60311425	60311926	.	0	.
chr7	130977790	130978291	.	0	.
chr15	81787402	81787903	.	0	.
chr12	12652081	12652582	.	0	.
chr15	80026602	80027103	.	0	.
chr10	86636812	86637313	.	0	.
chr4	149886686	149887187	.	0	.
chr5	135887642	135888143	.	0	.
chr7	130982304	130982805	.	0	.
chr5	139033553	139034054	.	0	.
chr4	156192452	156192953	.	0	.
chr17	45889400	45889901	.	0	.
chr2	168123599	168124100	.	0	.
chr2	59161633	59162134	.	0	.
chr2	25863219	25863720	.	0	.
chr15	78403809	78404310	.	0	.
chr11	120821068	120821569	.	0	.
chr13	92595492	92595993	.	0	.
chr17	27445690	27446191	.	0	.
chr1	171437288	171437789	.	0	.
chr13	54608591	54609092	.	0	.
chr10	57794668	57795169	.	0	.
chr8	84743949	84744450	.	0	.
chr1	135258330	135258831	.	0	.
chr15	87711495	87711996	.	0	.
chr5	139813025	139813526	.	0	.
chr6	84385635	84386136	.	0	.
chr9	35335797	35336298	.	0	.
chr6	30353591	30354092	.	0	.
chr8	105295748	105296249	.	0	.
chr11	32564880	32565381	.	0	.
chr17	65571342	65571843	.	0	.
chr4	62509902	62510403	.	0	.
chr4	117946845	117947346	.	0	.
chr8	110938789	110939290	.	0	.
chr11	117120572	117121073	.	0	.
chr18	76072523	76073024	.	0	.
chr8	87450074	87450575	.	0	.
chr4	43258367	43258868	.	0	.
chr6	89354071	89354572	.	0	.
chr19	57146791	57147292	.	0	.
chr16	35438946	35439447	.	0	.
chr5	134437372	134437873	.	0	.
chr11	65209371	65209872	.	0	.
chr2	129133311	129133812	.	0	.
chr11	78435674	78436175	.	0	.
chr1	132355021	132355522	.	0	.
chr7	135551430	135551931	.	0	.
chr13	51074316	51074817	.	0	.
chr7	19830651	19831152	.	0	.
chr14	70508412	70508913	.	0	.
chr4	40798731	40799232	.	0	.
chr12	12810878	12811379	.	0	.
chr11	97048172	97048673	.	0	.
chr8	124318591	124319092	.	0	.
chr12	8379638	8380139	.	0	.
chr16	78301429	78301930	.	0	.
chr4	134744155	134744656	.	0	.
chr7	80357056	80357557	.	0	.
chr4	125017403	125017904	.	0	.
chr3	101500324	101500825	.	0	.
chr6	89344878	89345379	.	0	.
chr8	94997717	94998218	.	0	.
chr8	62417651	62418152	.	0	.
chr9	59551737	59552238	.	0	.
chr1	132200595	132201096	.	0	.
chr11	117284694	117285195	.	0	.
chr2	69810098	69810599	.	0	.
chr10	80802536	80803037	.	0	.
chr1	54826591	54827092	.	0	.
chr2	113327430	113327931	.	0	.
chr7	126831915	126832416	.	0	.
chr9	107659512	107660013	.	0	.
chr2	129240806	129241307	.	0	.
chr5	139816018	139816519	.	0	.
chr1	75506862	75507363	.	0	.
chr18	33849243	33849744	.	0	.
chr13	111798009	111798510	.	0	.
chr14	63352849	63353350	.	0	.
chr18	77732463	77732964	.	0	.
chr7	49145782	49146283	.	0	.
chr1	74121776	74122277	.	0	.
chr10	79116353	79116854	.	0	.
chr11	98742835	98743336	.	0	.
chr7	64021468	64021969	.	0	.
chr12	12792145	12792646	.	0	.
chr11	50224725	50225226	.	0	.
chr5	114573863	114574364	.	0	.
chr2	172345204	172345705	.	0	.
chr2	91130097	91130598	.	0	.
chr16	22548019	22548520	.	0	.
chr16	30540535	30541036	.	0	.
chr17	28780883	28781384	.	0	.
chr17	35697901	35698402	.	0	.
chr9	44135910	44136411	.	0	.
chr15	77013831	77014332	.	0	.
chr16	4641997	4642498	.	0	.
chr17	28515817	28516318	.	0	.
chr9	110684036	110684537	.	0	.
chr16	90144285	90144786	.	0	.
chr15	59633697	59634198	.	0	.
chr5	34535032	34535533	.	0	.
chr6	112245563	112246064	.	0	.
chr2	181673367	181673868	.	0	.
chr5	120698972	120699473	.	0	.
chr1	155030570	155031071	.	0	.
chr5	92961814	92962315	.	0	.
chr3	117359979	117360480	.	0	.
chr14	32036407	32036908	.	0	.
chr2	32751257	32751758	.	0	.
chr5	139378915	139379416	.	0	.
chr15	78988493	78988994	.	0	.
chr6	120225693	120226194	.	0	.
chr11	77802194	77802695	.	0	.
chr10	60623002	60623503	.	0	.
chr11	50672746	50673247	.	0	.
chr7	49606509	49607010	.	0	.
chr8	94995295	94995796	.	0	.
chr5	118033688	118034189	.	0	.
chr11	98750741	98751242	.	0	.
chr7	141216111	141216612	.	0	.
chr17	10449762	10450263	.	0	.
chr11	113224014	113224515	.	0	.
chr11	115841930	115842431	.	0	.
chr14	79263414	79263915	.	0	.
chr8	94777930	94778431	.	0	.
chr7	44697156	44697657	.	0	.
chr11	8483145	8483646	.	0	.
chr2	35171157	35171658	.	0	.
chr3	65871146	65871647	.	0	.
chr4	125702853	125703354	.	0	.
chr1	153535536	153536037	.	0	.
chr12	113033057	113033558	.	0	.
chr9	89623008	89623509	.	0	.
chr14	21822792	21823293	.	0	.
chr9	90054266	90054767	.	0	.
chr11	32857384	32857885	.	0	.
chr18	35849408	35849909	.	0	.
chr2	118510349	118510850	.	0	.
chr4	152079837	152080338	.	0	.
chr5	118065526	118066027	.	0	.
chr5	101992896	101993397	.	0	.
chr5	142589340	142589841	.	0	.
chr12	72664577	72665078	.	0	.
chr11	80818101	80818602	.	0	.
chr13	24565405	24565906	.	0	.
chr16	23270336	23270837	.	0	.
chr10	116260861	116261362	.	0	.
chr9	92250023	92250524	.	0	.
chr16	22548554	22549055	.	0	.
chr3	101701214	101701715	.	0	.
chr9	74909182	74909683	.	0	.
chr6	90618854	90619355	.	0	.
chr12	8334094	8334595	.	0	.
chr11	101063593	101064094	.	0	.
chr6	89354655	89355156	.	0	.
chr17	44239143	44239644	.	0	.
chr4	89687813	89688314	.	0	.
chr9	102726248	102726749	.	0	.
chr12	31090334	31090835	.	0	.
chr7	139957866	139958367	.	0	.
chr7	80192417	80192918	.	0	.
chr7	34972905	34973406	.	0	.
chr11	75966941	75967442	.	0	.
chr16	17986398	17986899	.	0	.
chr13	49169697	49170198	.	0	.
chr19	7557211	7557712	.	0	.
chr18	60659955	60660456	.	0	.
chr17	35485689	35486190	.	0	.
chr3	79244265	79244766	.	0	.
chr15	79950553	79951054	.	0	.
chr2	153548263	153548764	.	0	.
chr2	158139651	158140152	.	0	.
chr6	91210664	91211165	.	0	.
chr4	130168261	130168762	.	0	.
chr18	73365278	73365779	.	0	.
chr7	27174480	27174981	.	0	.
chr5	115286517	115287018	.	0	.
chr17	28013195	28013696	.	0	.
chr4	119245569	119246070	.	0	.
chr19	4268996	4269497	.	0	.
chr5	113961760	113962261	.	0	.
chr16	23266023	23266524	.	0	.
chr6	83188344	83188845	.	0	.
chr1	134719393	134719894	.	0	.
chr12	105993190	105993691	.	0	.
chr8	123752975	123753476	.	0	.
chr8	107544723	107545224	.	0	.
chr1	190061678	190062179	.	0	.
chr4	40919874	40920375	.	0	.
chr1	91211669	91212170	.	0	.
chr18	80287312	80287813	.	0	.
chr10	41997822	41998323	.	0	.
chr4	56865003	56865504	.	0	.
chr16	95917978	95918479	.	0	.
chr4	149936949	149937450	.	0	.
chr7	98119319	98119820	.	0	.
chr10	75935585	75936086	.	0	.
chr16	90139700	90140201	.	0	.
chr4	135298138	135298639	.	0	.
chr2	154552474	154552975	.	0	.
chr14	7952780	7953281	.	0	.
chr2	156736789	156737290	.	0	.
chr1	119404659	119405160	.	0	.
chr17	49472504	49473005	.	0	.
chr4	83567682	83568183	.	0	.
chr7	17016974	17017475	.	0	.
chr2	167727106	167727607	.	0	.
chr11	114704140	114704641	.	0	.
chr4	128904326	128904827	.	0	.
chr12	108006111	108006612	.	0	.
chr4	120161079	120161580	.	0	.
chr11	50403308	50403809	.	0	.
chr1	93667680	93668181	.	0	.
chr4	134355677	134356178	.	0	.
chr4	128793608	128794109	.	0	.
chr10	80887158	80887659	.	0	.
chr6	30356144	30356645	.	0	.
chr5	53266856	53267357	.	0	.
chr4	139587443	139587944	.	0	.
chr4	149351575	149352076	.	0	.
chr2	71655804	71656305	.	0	.
chr2	148789096	148789597	.	0	.
chr10	42894529	42895030	.	0	.
chr18	80360919	80361420	.	0	.
chr9	44726388	44726889	.	0	.
chr2	158522973	158523474	.	0	.
chr15	76998824	76999325	.	0	.
chr4	150758789	150759290	.	0	.
chr6	128435399	128435900	.	0	.
chr10	95623111	95623612	.	0	.
chr8	122655991	122656492	.	0	.
chr14	78383282	78383783	.	0	.
chr13	42301398	42301899	.	0	.
chr17	56810137	56810638	.	0	.
chr2	25126183	25126684	.	0	.
chr6	108536940	108537441	.	0	.
chr9	60504287	60504788	.	0	.
chr2	156717259	156717760	.	0	.
chr8	83917522	83918023	.	0	.
chr7	97446545	97447046	.	0	.
chr17	89144732	89145233	.	0	.
chr12	12904510	12905011	.	0	.
chr2	92371389	92371890	.	0	.
chr3	68576443	68576944	.	0	.
chr15	27871688	27872189	.	0	.
chr10	80548500	80549001	.	0	.
chr13	34192765	34193266	.	0	.
chr1	131125934	131126435	.	0	.
chr11	49260552	49261053	.	0	.
chr5	45638952	45639453	.	0	.
chr4	47310757	47311258	.	0	.
chr2	51147461	51147962	.	0	.
chr17	71720919	71721420	.	0	.
chr2	29358919	29359420	.	0	.
chr15	85534147	85534648	.	0	.
chr2	33160217	33160718	.	0	.
chr8	115524661	115525162	.	0	.
chr2	105108783	105109284	.	0	.
chr1	132319206	132319707	.	0	.
chr15	75873256	75873757	.	0	.
chr8	64826485	64826986	.	0	.
chr7	75852197	75852698	.	0	.
chr15	36873239	36873740	.	0	.
chr5	74960264	74960765	.	0	.
chr4	62515418	62515919	.	0	.
chr14	54575571	54576072	.	0	.
chr12	86816835	86817336	.	0	.
chr1	179041752	179042253	.	0	.
chr4	128218025	128218526	.	0	.
chr5	3289957	3290458	.	0	.
chr16	30539916	30540417	.	0	.
chr14	31226916	31227417	.	0	.
chr9	120735204	120735705	.	0	.
chr3	145649686	145650187	.	0	.
chr2	79891839	79892340	.	0	.
chr13	24565957	24566458	.	0	.
chr10	16178679	16179180	.	0	.
chr7	98121139	98121640	.	0	.
chr17	12327720	12328221	.	0	.
chr4	141506255	141506756	.	0	.
chr8	125920238	125920739	.	0	.
chr10	75930253	75930754	.	0	.
chr1	36017108	36017609	.	0	.
chr16	23520087	23520588	.	0	.
chr8	106510592	106511093	.	0	.
chr14	54885191	54885692	.	0	.
chr15	12341430	12341931	.	0	.
chr5	96616855	96617356	.	0	.
chr1	93068515	93069016	.	0	.
chr18	60730023	60730524	.	0	.
chr2	32127972	32128473	.	0	.
chr10	128922938	128923439	.	0	.
chr1	170651306	170651807	.	0	.
chr7	4522309	4522810	.	0	.
chr5	135106612	135107113	.	0	.
chr1	191864423	191864924	.	0	.
chr11	31713622	31714123	.	0	.
chr8	94997209	94997710	.	0	.
chr9	67208432	67208933	.	0	.
chr12	73793995	73794496	.	0	.
chr7	143738505	143739006	.	0	.
chr15	89178843	89179344	.	0	.
chr14	65722760	65723261	.	0	.
chr12	108495505	108496006	.	0	.
chr4	48676502	48677003	.	0	.
chr11	98772694	98773195	.	0	.
chr12	112952373	112952874	.	0	.
chr10	81583360	81583861	.	0	.
chr19	7168399	7168900	.	0	.
chr7	19362248	19362749	.	0	.
chr7	128203164	128203665	.	0	.
chr9	59695269	59695770	.	0	.
chr4	135565150	135565651	.	0	.
chr5	114139183	114139684	.	0	.
chr2	122611031	122611532	.	0	.
chr4	133056075	133056576	.	0	.
chr11	119391940	119392441	.	0	.
chr11	100395167	100395668	.	0	.
chr16	92345210	92345711	.	0	.
chr11	98580496	98580997	.	0	.
chr18	67460772	67461273	.	0	.
chr4	131924016	131924517	.	0	.
chr16	33176766	33177267	.	0	.
chr15	79038829	79039330	.	0	.
chr14	63338395	63338896	.	0	.
chr1	92787131	92787632	.	0	.
chr7	27609328	27609829	.	0	.
chr4	132075078	132075579	.	0	.
chr1	36539107	36539608	.	0	.
chr9	58131694	58132195	.	0	.
chr14	67852908	67853409	.	0	.
chr10	61517603	61518104	.	0	.
chr4	137960660	137961161	.	0	.
chr6	137613855	137614356	.	0	.
chr1	120115942	120116443	.	0	.
chr6	86655714	86656215	.	0	.
chr11	114691571	114692072	.	0	.
chr2	27327051	27327552	.	0	.
chr6	83188899	83189400	.	0	.
chr11	98389303	98389804	.	0	.
chr19	3669029	3669530	.	0	.
chr2	153609533	153610034	.	0	.
chr3	68542848	68543349	.	0	.
chr7	28864175	28864676	.	0	.
chr7	25288197	25288698	.	0	.
chr16	22428869	22429370	.	0	.
chr8	4213602	4214103	.	0	.
chr11	119507895	119508396	.	0	.
chr4	117866000	117866501	.	0	.
chr8	11797085	11797586	.	0	.
chr13	19619312	19619813	.	0	.
chr11	74408810	74409311	.	0	.
chr4	43533309	43533810	.	0	.
chr6	91200666	91201167	.	0	.
chr1	195092127	195092628	.	0	.
chr2	119804178	119804679	.	0	.
chr11	97437670	97438171	.	0	.
chr3	65927605	65928106	.	0	.
chr3	121736037	121736538	.	0	.
chr6	72627247	72627748	.	0	.
chr7	113048358	113048859	.	0	.
chr8	117794889	117795390	.	0	.
chr7	110156738	110157239	.	0	.
chr17	79544133	79544634	.	0	.
chr4	77310288	77310789	.	0	.
chr9	34993752	34994253	.	0	.
chr9	47265825	47266326	.	0	.
chr3	88002439	88002940	.	0	.
chr11	50229425	50229926	.	0	.
chr6	86366478	86366979	.	0	.
chr12	102286614	102287115	.	0	.
chr5	140611077	140611578	.	0	.
chr13	52283944	52284445	.	0	.
chr8	94822803	94823304	.	0	.
chr3	100473103	100473604	.	0	.
chr17	88626204	88626705	.	0	.
chr1	132287397	132287898	.	0	.
chr15	76117844	76118345	.	0	.
chr7	98104669	98105170	.	0	.
chr5	36775970	36776471	.	0	.
chr6	54554248	54554749	.	0	.
chr13	83730687	83731188	.	0	.
chr2	122765098	122765599	.	0	.
chr5	137759958	137760459	.	0	.
chr4	138343418	138343919	.	0	.
chr7	52005878	52006379	.	0	.
chr9	40390903	40391404	.	0	.
chr7	139273250	139273751	.	0	.
chr14	103649992	103650493	.	0	.
chr13	51155696	51156197	.	0	.
chr8	124643817	124644318	.	0	.
chr4	120277105	120277606	.	0	.
chr1	133418149	133418650	.	0	.
chr5	120490663	120491164	.	0	.
chr9	77636589	77637090	.	0	.
chr6	6216942	6217443	.	0	.
chr17	35549454	35549955	.	0	.
chr18	74014265	74014766	.	0	.
chr9	109098899	109099400	.	0	.
chr18	83132501	83133002	.	0	.
chr13	59652640	59653141	.	0	.
chr14	23885524	23886025	.	0	.
chr3	90381695	90382196	.	0	.
chr11	94498038	94498539	.	0	.
chr11	75869671	75870172	.	0	.
chr7	49280347	49280848	.	0	.
chr5	118751435	118751936	.	0	.
chr9	57950556	57951057	.	0	.
chr12	5147569	5148070	.	0	.
chr18	61952268	61952769	.	0	.
chr14	55055103	55055604	.	0	.
chr11	54071710	54072211	.	0	.
chr3	101551570	101552071	.	0	.
chr17	27242455	27242956	.	0	.
chr9	15517914	15518415	.	0	.
chr1	120357221	120357722	.	0	.
chr9	59691545	59692046	.	0	.
chr5	144358273	144358774	.	0	.
chr2	32079111	32079612	.	0	.
chr8	11541971	11542472	.	0	.
chr4	44983339	44983840	.	0	.
chr5	115543644	115544145	.	0	.
chr2	125062389	125062890	.	0	.
chr4	139337004	139337505	.	0	.
chr15	12490483	12490984	.	0	.
chr5	122068749	122069250	.	0	.
chr2	25467847	25468348	.	0	.
chr10	80803112	80803613	.	0	.
chr11	55015249	55015750	.	0	.
chr4	140657565	140658066	.	0	.
chr5	139391566	139392067	.	0	.
chr9	108117096	108117597	.	0	.
chr8	121892940	121893441	.	0	.
chr14	65331794	65332295	.	0	.
chr11	72402070	72402571	.	0	.
chr1	92914191	92914692	.	0	.
chr2	119802765	119803266	.	0	.
chr18	15150000	15150501	.	0	.
chr19	53437200	53437701	.	0	.
chr1	120266325	120266826	.	0	.
chr7	116237548	116238049	.	0	.
chr11	33142286	33142787	.	0	.
chr2	128179830	128180331	.	0	.
chr2	30758225	30758726	.	0	.
chr8	118168737	118169238	.	0	.
chr7	112615235	112615736	.	0	.
chr17	56804912	56805413	.	0	.
chr7	133730561	133731062	.	0	.
chr4	128855486	128855987	.	0	.
chr1	86472094	86472595	.	0	.
chr13	98205648	98206149	.	0	.
chr5	139015010	139015511	.	0	.
chr1	93063497	93063998	.	0	.
chr9	106460577	106461078	.	0	.
chr10	95318274	95318775	.	0	.
chr4	117844462	117844963	.	0	.
chr6	59426142	59426643	.	0	.
chrX	11748260	11748761	.	0	.
chr4	118401921	118402422	.	0	.
chr8	3630854	3631355	.	0	.
chr11	101433308	101433809	.	0	.
chr7	46615549	46616050	.	0	.
chr5	120600897	120601398	.	0	.
chr18	60761681	60762182	.	0	.
chr18	34841992	34842493	.	0	.
chr4	154293766	154294267	.	0	.
chr9	119632087	119632588	.	0	.
chr12	80270871	80271372	.	0	.
chr9	99340045	99340546	.	0	.
chr19	42035293	42035794	.	0	.
chr2	27916269	27916770	.	0	.
chr2	178673614	178674115	.	0	.
chr15	76158233	76158734	.	0	.
chr2	48441204	48441705	.	0	.
chr11	69617634	69618135	.	0	.
chr11	117780442	117780943	.	0	.
chr6	113166884	113167385	.	0	.
chr8	94987444	94987945	.	0	.
chr13	112073960	112074461	.	0	.
chr14	23886072	23886573	.	0	.
chr11	116146318	116146819	.	0	.
chr1	172491831	172492332	.	0	.
chr9	64934112	64934613	.	0	.
chr9	54637408	54637909	.	0	.
chr3	88000746	88001247	.	0	.
chr4	65607070	65607571	.	0	.
chr10	99284059	99284560	.	0	.
chr11	102643814	102644315	.	0	.
chr16	95501992	95502493	.	0	.
chr3	68534673	68535174	.	0	.
chr6	55009585	55010086	.	0	.
chr13	41336253	41336754	.	0	.
chr8	111729638	111730139	.	0	.
chr3	117360494	117360995	.	0	.
chr8	107483235	107483736	.	0	.
chr2	124747571	124748072	.	0	.
chr9	77481328	77481829	.	0	.
chr7	115312884	115313385	.	0	.
chr10	107930625	107931126	.	0	.
chr4	47227734	47228235	.	0	.
chr5	125134727	125135228	.	0	.
chr6	23132519	23133020	.	0	.
chr14	63353403	63353904	.	0	.
chr17	5997308	5997809	.	0	.
chr5	115546998	115547499	.	0	.
chr2	25469427	25469928	.	0	.
chr10	118129195	118129696	.	0	.
chr3	105705105	105705606	.	0	.
chr6	115501037	115501538	.	0	.
chr7	30968566	30969067	.	0	.
chr6	30355615	30356116	.	0	.
chr9	98965048	98965549	.	0	.
chr2	35702532	35703033	.	0	.
chr2	181423835	181424336	.	0	.
chr5	140654315	140654816	.	0	.
chr9	30949627	30950128	.	0	.
chr13	112189482	112189983	.	0	.
chr18	24095172	24095673	.	0	.
chr17	23676497	23676998	.	0	.
chr2	168955091	168955592	.	0	.
chr16	11670841	11671342	.	0	.
chr11	117390078	117390579	.	0	.
chr12	84180943	84181444	.	0	.
chr8	68276409	68276910	.	0	.
chr15	77857549	77858050	.	0	.
chr2	173307077	173307578	.	0	.
chr11	7229977	7230478	.	0	.
chr17	28874813	28875314	.	0	.
chr16	33859973	33860474	.	0	.
chr6	38341662	38342163	.	0	.
chr4	140929793	140930294	.	0	.
chr15	80062317	80062818	.	0	.
chr10	77590779	77591280	.	0	.
chr7	98116950	98117451	.	0	.
chr2	164442977	164443478	.	0	.
chr18	12645934	12646435	.	0	.
chr13	28878562	28879063	.	0	.
chr7	27659499	27660000	.	0	.
chr2	27042442	27042943	.	0	.
chr9	107298444	107298945	.	0	.
chr11	77832415	77832916	.	0	.
chr6	55097983	55098484	.	0	.
chr2	38950305	38950806	.	0	.
chr17	25592329	25592830	.	0	.
chr17	47822847	47823348	.	0	.
chr9	65407883	65408384	.	0	.
chr11	120220129	120220630	.	0	.
chr2	167964358	167964859	.	0	.
chr2	168080412	168080913	.	0	.
chr2	91035313	91035814	.	0	.
chr4	55477817	55478318	.	0	.
chr8	47932427	47932928	.	0	.
chr17	23877157	23877658	.	0	.
chr10	119065396	119065897	.	0	.
chr6	72477471	72477972	.	0	.
chr7	35373246	35373747	.	0	.
chr6	137573825	137574326	.	0	.
chr2	35861178	35861679	.	0	.
chr1	180384517	180385018	.	0	.
chr9	21463216	21463717	.	0	.
chr17	31207862	31208363	.	0	.
chr11	98388676	98389177	.	0	.
chrX	153139774	153140275	.	0	.
chr12	112405582	112406083	.	0	.
chr3	145632893	145633394	.	0	.
chr1	134082933	134083434	.	0	.
chr11	59459025	59459526	.	0	.
chr11	78803528	78804029	.	0	.
chr7	144038199	144038700	.	0	.
chr7	100013866	100014367	.	0	.
chr1	126484623	126485124	.	0	.
chr14	21488983	21489484	.	0	.
chr12	112287977	112288478	.	0	.
chr15	79322677	79323178	.	0	.
chr9	120750964	120751465	.	0	.
chr8	70649327	70649828	.	0	.
chr6	113860963	113861464	.	0	.
chr4	32561310	32561811	.	0	.
chr7	45075201	45075702	.	0	.
chr17	46698168	46698669	.	0	.
chr10	81346592	81347093	.	0	.
chr5	125330583	125331084	.	0	.
chr11	8468436	8468937	.	0	.
chr10	40076003	40076504	.	0	.
chr5	118814034	118814535	.	0	.
chr3	31149624	31150125	.	0	.
chr9	63610900	63611401	.	0	.
chr9	57967551	57968052	.	0	.
chr3	93537065	93537566	.	0	.
chr13	73722871	73723372	.	0	.
chr2	153494225	153494726	.	0	.
chr11	54820585	54821086	.	0	.
chr5	35739856	35740357	.	0	.
chr3	104360217	104360718	.	0	.
chr4	141821154	141821655	.	0	.
chr5	110459009	110459510	.	0	.
chr12	76458981	76459482	.	0	.
chr9	110375663	110376164	.	0	.
chr14	101608921	101609422	.	0	.
chr8	3609005	3609506	.	0	.
chr4	131254134	131254635	.	0	.
chr11	94134455	94134956	.	0	.
chr8	60758793	60759294	.	0	.
chr5	76822023	76822524	.	0	.
chr13	91365225	91365726	.	0	.
chr16	30193241	30193742	.	0	.
chr1	180407306	180407807	.	0	.
chr12	32104359	32104860	.	0	.
chr7	45568059	45568560	.	0	.
chr16	18135130	18135631	.	0	.
chr2	157924421	157924922	.	0	.
chr17	32916971	32917472	.	0	.
chr13	69811092	69811593	.	0	.
chr2	121614695	121615196	.	0	.
chr5	117997370	117997871	.	0	.
chr7	45598929	45599430	.	0	.
chr14	23942094	23942595	.	0	.
chr14	70584208	70584709	.	0	.
chr5	28563386	28563887	.	0	.
chr7	46611947	46612448	.	0	.
chr4	62508860	62509361	.	0	.
chr8	25806204	25806705	.	0	.
chr10	75120923	75121424	.	0	.
chr4	130168765	130169266	.	0	.
chr1	180371454	180371955	.	0	.
chr8	121981415	121981916	.	0	.
chr4	155651518	155652019	.	0	.
chr16	91639115	91639616	.	0	.
chr4	137250298	137250799	.	0	.
chr11	30198107	30198608	.	0	.
chr12	86793813	86794314	.	0	.
chr2	35171794	35172295	.	0	.
chr15	77068512	77069013	.	0	.
chr1	132557990	132558491	.	0	.
chr7	139961071	139961572	.	0	.
chr18	23309854	23310355	.	0	.
chr14	55497804	55498305	.	0	.
chr8	69822335	69822836	.	0	.
chr9	35123403	35123904	.	0	.
chr9	108121487	108121988	.	0	.
chr17	48437545	48438046	.	0	.
chr7	28923808	28924309	.	0	.
chr8	84021576	84022077	.	0	.
chr10	60622500	60623001	.	0	.
chr10	94883173	94883674	.	0	.
chr16	5168657	5169158	.	0	.
chr19	10078330	10078831	.	0	.
chr17	79051967	79052468	.	0	.
chr17	31073255	31073756	.	0	.
chr6	134189487	134189988	.	0	.
chr14	73632568	73633069	.	0	.
chr12	24893986	24894487	.	0	.
chr17	7165981	7166482	.	0	.
chr1	133695939	133696440	.	0	.
chr7	67689707	67690208	.	0	.
chr6	54462666	54463167	.	0	.
chr12	33220366	33220867	.	0	.
chr8	46246275	46246776	.	0	.
chr6	77979637	77980138	.	0	.
chr13	92676079	92676580	.	0	.
chr6	71991175	71991676	.	0	.
chr13	38579802	38580303	.	0	.
chr5	50034146	50034647	.	0	.
chr3	41195299	41195800	.	0	.
chr13	41339755	41340256	.	0	.
chr17	25427375	25427876	.	0	.
chr2	167945395	167945896	.	0	.
chr3	145988354	145988855	.	0	.
chr3	98319153	98319654	.	0	.
chr9	59062397	59062898	.	0	.
chr1	135665426	135665927	.	0	.
chr15	102013559	102014060	.	0	.
chr1	166282554	166283055	.	0	.
chr18	75430803	75431304	.	0	.
chr4	154023769	154024270	.	0	.
chr2	31954748	31955249	.	0	.
chr4	133552829	133553330	.	0	.
chr16	22879972	22880473	.	0	.
chr19	47414172	47414673	.	0	.
chr18	75330751	75331252	.	0	.
chr10	79624928	79625429	.	0	.
chr3	107943503	107944004	.	0	.
chr13	63230932	63231433	.	0	.
chr12	102682007	102682508	.	0	.
chr1	167269842	167270343	.	0	.
chr6	90508204	90508705	.	0	.
chr11	97424247	97424748	.	0	.
chr6	48439533	48440034	.	0	.
chr6	83580716	83581217	.	0	.
chr12	17881503	17882004	.	0	.
chr1	135169780	135170281	.	0	.
chr8	70634017	70634518	.	0	.
chr15	102017998	102018499	.	0	.
chr12	108392232	108392733	.	0	.
chr2	180835830	180836331	.	0	.
chr1	9967683	9968184	.	0	.
chr8	125913062	125913563	.	0	.
chr5	142908076	142908577	.	0	.
chr9	110624261	110624762	.	0	.
chr8	123717465	123717966	.	0	.
chr10	61378007	61378508	.	0	.
chr8	76901826	76902327	.	0	.
chr13	19622839	19623340	.	0	.
chr5	75377713	75378214	.	0	.
chr17	24474493	24474994	.	0	.
chr15	81937538	81938039	.	0	.
chr13	73763429	73763930	.	0	.
chr2	30093467	30093968	.	0	.
chr1	164460516	164461017	.	0	.
chr16	33986814	33987315	.	0	.
chr5	120196778	120197279	.	0	.
chr13	51171329	51171830	.	0	.
chr16	35465810	35466311	.	0	.
chr5	34955582	34956083	.	0	.
chr4	139341515	139342016	.	0	.
chr11	120232518	120233019	.	0	.
chr1	154983224	154983725	.	0	.
chr19	55837746	55838247	.	0	.
chr16	92397838	92398339	.	0	.
chr2	150765620	150766121	.	0	.
chr2	57238107	57238608	.	0	.
chr11	112772798	112773299	.	0	.
chr5	137741261	137741762	.	0	.
chr9	63555421	63555922	.	0	.
chr4	135772631	135773132	.	0	.
chr15	87625557	87626058	.	0	.
chr8	69821834	69822335	.	0	.
chr9	21309488	21309989	.	0	.
chr11	59154117	59154618	.	0	.
chr15	77021086	77021587	.	0	.
chr2	168072777	168073278	.	0	.
chr13	51073779	51074280	.	0	.
chr19	6023860	6024361	.	0	.
chr2	165830311	165830812	.	0	.
chr16	4497548	4498049	.	0	.
chr7	141506155	141506656	.	0	.
chr14	69212199	69212700	.	0	.
chr2	181460283	181460784	.	0	.
chr15	12654779	12655280	.	0	.
chr2	69802759	69803260	.	0	.
chr14	79301344	79301845	.	0	.
chr11	97669224	97669725	.	0	.
chr2	158253824	158254325	.	0	.
chr15	78403301	78403802	.	0	.
chr7	45981674	45982175	.	0	.
chr8	33992919	33993420	.	0	.
chr11	94137659	94138160	.	0	.
chr15	52039804	52040305	.	0	.
chr12	24930734	24931235	.	0	.
chr9	108268514	108269015	.	0	.
chr12	80463180	80463681	.	0	.
chr13	42526820	42527321	.	0	.
chr10	79633327	79633828	.	0	.
chr7	27658936	27659437	.	0	.
chr16	4643622	4644123	.	0	.
chr18	76952389	76952890	.	0	.
chr14	11578377	11578878	.	0	.
chr15	76456598	76457099	.	0	.
chr1	105765649	105766150	.	0	.
chr6	85253945	85254446	.	0	.
chr15	38452677	38453178	.	0	.
chr4	123050718	123051219	.	0	.
chr2	59824115	59824616	.	0	.
chr8	85380724	85381225	.	0	.
chr11	75926749	75927250	.	0	.
chr1	41652578	41653079	.	0	.
chr11	98769178	98769679	.	0	.
chr9	58145391	58145892	.	0	.
chr19	38042103	38042604	.	0	.
chr13	20050128	20050629	.	0	.
chr12	108244773	108245274	.	0	.
chr11	96250884	96251385	.	0	.
chr2	125684479	125684980	.	0	.
chr13	111936502	111937003	.	0	.
chr4	131916398	131916899	.	0	.
chr17	23876541	23877042	.	0	.
chr4	141924193	141924694	.	0	.
chr8	13974804	13975305	.	0	.
chr2	65022689	65023190	.	0	.
chr17	89200238	89200739	.	0	.
chr8	83134954	83135455	.	0	.
chr1	193035198	193035699	.	0	.
chr4	62630714	62631215	.	0	.
chr5	124562335	124562836	.	0	.
chr17	75465321	75465822	.	0	.
chr7	122952037	122952538	.	0	.
chr2	71728734	71729235	.	0	.
chr18	14654876	14655377	.	0	.
chr17	5940765	5941266	.	0	.
chr19	3929517	3930018	.	0	.
chr15	99248942	99249443	.	0	.
chr8	87197955	87198456	.	0	.
chr15	99501141	99501642	.	0	.
chr4	139967908	139968409	.	0	.
chr18	70053419	70053920	.	0	.
chr4	89427824	89428325	.	0	.
chr11	96934864	96935365	.	0	.
chr8	78771122	78771623	.	0	.
chr6	149565751	149566252	.	0	.
chr4	129498909	129499410	.	0	.
chr5	33053139	33053640	.	0	.
chr4	118259912	118260413	.	0	.
chr9	57253967	57254468	.	0	.
chr16	23239560	23240061	.	0	.
chr8	124528446	124528947	.	0	.
chr2	29716537	29717038	.	0	.
chr15	76208051	76208552	.	0	.
chr12	25163360	25163861	.	0	.
chr7	126797324	126797825	.	0	.
chr14	121437025	121437526	.	0	.
chr2	167972090	167972591	.	0	.
chr4	117277558	117278059	.	0	.
chr7	101480672	101481173	.	0	.
chr2	32559085	32559586	.	0	.
chr16	33085613	33086114	.	0	.
chr5	120492370	120492871	.	0	.
chr17	26011976	26012477	.	0	.
chr9	57951897	57952398	.	0	.
chr5	35189043	35189544	.	0	.
chr6	125148159	125148660	.	0	.
chr4	120259473	120259974	.	0	.
chr7	144262471	144262972	.	0	.
chr2	173258602	173259103	.	0	.
chr14	65266395	65266896	.	0	.
chr7	120851575	120852076	.	0	.
chr1	165194269	165194770	.	0	.
chr7	64006977	64007478	.	0	.
chr1	93668660	93669161	.	0	.
chr2	114057229	114057730	.	0	.
chr3	88000187	88000688	.	0	.
chr11	86961947	86962448	.	0	.
chr5	31630009	31630510	.	0	.
chr5	116450805	116451306	.	0	.
chr1	193035880	193036381	.	0	.
chr2	152950313	152950814	.	0	.
chr5	92042445	92042946	.	0	.
chr15	78405682	78406183	.	0	.
chr8	84959722	84960223	.	0	.
chr12	112721106	112721607	.	0	.
chr4	55477164	55477665	.	0	.
chr4	129033382	129033883	.	0	.
chr16	96200136	96200637	.	0	.
chr2	103643508	103644009	.	0	.
chr7	30973614	30974115	.	0	.
chr17	75464809	75465310	.	0	.
chr9	59656035	59656536	.	0	.
chr18	76034466	76034967	.	0	.
chr9	73067913	73068414	.	0	.
chr7	49601445	49601946	.	0	.
chr11	58334610	58335111	.	0	.
chr12	108255251	108255752	.	0	.
chr6	71361172	71361673	.	0	.
chr4	155361274	155361775	.	0	.
chr6	127692202	127692703	.	0	.
chr6	71934134	71934635	.	0	.
chrX	72986993	72987494	.	0	.
chr2	132741975	132742476	.	0	.
chr17	24481300	24481801	.	0	.
chr17	32528634	32529135	.	0	.
chr2	160887849	160888350	.	0	.
chr7	100979150	100979651	.	0	.
chr2	35691637	35692138	.	0	.
chr14	120355109	120355610	.	0	.
chr8	31272794	31273295	.	0	.
chr10	59948795	59949296	.	0	.
chr4	148159890	148160391	.	0	.
chr13	54684050	54684551	.	0	.
chr15	89184757	89185258	.	0	.
chr9	65561954	65562455	.	0	.
chr6	146846341	146846842	.	0	.
chr3	68493239	68493740	.	0	.
chr18	35022372	35022873	.	0	.
chr13	64477825	64478326	.	0	.
chr7	101017122	101017623	.	0	.
chr2	164385841	164386342	.	0	.
chr16	33916604	33917105	.	0	.
chr2	101986100	101986601	.	0	.
chr11	77791033	77791534	.	0	.
chr4	116160770	116161271	.	0	.
chr14	76625049	76625550	.	0	.
chr19	3919200	3919701	.	0	.
chr3	94784205	94784706	.	0	.
chr4	120011693	120012194	.	0	.
chr11	103683640	103684141	.	0	.
chr11	52447158	52447659	.	0	.
chr5	125344206	125344707	.	0	.
chr11	118983027	118983528	.	0	.
chr2	164449572	164450073	.	0	.
chr9	65671451	65671952	.	0	.
chr18	38200001	38200502	.	0	.
chr2	153549444	153549945	.	0	.
chr12	108960126	108960627	.	0	.
chr17	28242196	28242697	.	0	.
chr18	35837007	35837508	.	0	.
chr11	103158912	103159413	.	0	.
chr11	119387043	119387544	.	0	.
chr11	115328639	115329140	.	0	.
chr4	141281757	141282258	.	0	.
chr8	3360536	3361037	.	0	.
chr11	90002609	90003110	.	0	.
chr9	105770750	105771251	.	0	.
chr6	32397013	32397514	.	0	.
chr5	74061208	74061709	.	0	.
chr5	110417665	110418166	.	0	.
chr2	153523072	153523573	.	0	.
chr4	139481433	139481934	.	0	.
chr9	64116788	64117289	.	0	.
chr11	3337511	3338012	.	0	.
chr16	17088915	17089416	.	0	.
chr15	73136955	73137456	.	0	.
chr15	12501408	12501909	.	0	.
chr2	26535501	26536002	.	0	.
chr8	72310739	72311240	.	0	.
chr2	153713181	153713682	.	0	.
chr17	67666860	67667361	.	0	.
chr4	134760625	134761126	.	0	.
chr2	37788844	37789345	.	0	.
chr13	41643727	41644228	.	0	.
chr4	155133829	155134330	.	0	.
chr11	119387549	119388050	.	0	.
chr1	119389721	119390222	.	0	.
chr2	153140057	153140558	.	0	.
chr10	52742565	52743066	.	0	.
chr10	80549275	80549776	.	0	.
chr13	80885402	80885903	.	0	.
chr11	84823440	84823941	.	0	.
chr4	133864549	133865050	.	0	.
chr18	76204594	76205095	.	0	.
chr10	23894640	23895141	.	0	.
chr1	13660323	13660824	.	0	.
chr11	108752239	108752740	.	0	.
chr2	75963515	75964016	.	0	.
chr7	68021711	68022212	.	0	.
chr11	5033074	5033575	.	0	.
chr3	101704897	101705398	.	0	.
chr18	35842513	35843014	.	0	.
chr11	5140594	5141095	.	0	.
chr7	75807377	75807878	.	0	.
chr11	96261469	96261970	.	0	.
chr2	153548842	153549343	.	0	.
chr11	43548067	43548568	.	0	.
chr14	24778989	24779490	.	0	.
chr13	95805683	95806184	.	0	.
chr3	68572215	68572716	.	0	.
chr17	70794129	70794630	.	0	.
chr8	83577293	83577794	.	0	.
chr4	149047330	149047831	.	0	.
chr18	68976369	68976870	.	0	.
chr15	75663291	75663792	.	0	.
chr14	59551744	59552245	.	0	.
chr8	68869328	68869829	.	0	.
chr19	4602373	4602874	.	0	.
chr14	121960987	121961488	.	0	.
chr16	35596639	35597140	.	0	.
chr6	48016078	48016579	.	0	.
chr11	3302735	3303236	.	0	.
chr11	20347421	20347922	.	0	.
chr1	180284024	180284525	.	0	.
chr2	29632996	29633497	.	0	.
chr6	136661461	136661962	.	0	.
chr6	82999984	83000485	.	0	.
chr9	54639094	54639595	.	0	.
chr7	114991243	114991744	.	0	.
chr6	7692985	7693486	.	0	.
chr1	89108783	89109284	.	0	.
chr15	86015991	86016492	.	0	.
chr8	84913075	84913576	.	0	.
chr15	73637139	73637640	.	0	.
chr6	34331785	34332286	.	0	.
chr2	32621168	32621669	.	0	.
chr3	85372974	85373475	.	0	.
chr12	98674775	98675276	.	0	.
chr10	83654538	83655039	.	0	.
chr11	88327049	88327550	.	0	.
chr7	80186608	80187109	.	0	.
chr10	74920872	74921373	.	0	.
chr6	38152162	38152663	.	0	.
chr6	39318947	39319448	.	0	.
chr4	46736854	46737355	.	0	.
chr5	92745787	92746288	.	0	.
chr14	27147751	27148252	.	0	.
chr2	180207868	180208369	.	0	.
chr14	55497303	55497804	.	0	.
chr19	5668234	5668735	.	0	.
chr3	108200325	108200826	.	0	.
chr12	88360538	88361039	.	0	.
chr2	158510599	158511100	.	0	.
chr1	119431543	119432044	.	0	.
chr19	29066958	29067459	.	0	.
chr18	61986438	61986939	.	0	.
chr14	31194817	31195318	.	0	.
chr5	50048888	50049389	.	0	.
chr2	26544186	26544687	.	0	.
chr1	132353339	132353840	.	0	.
chr14	45463550	45464051	.	0	.
chr10	42092432	42092933	.	0	.
chr2	151999986	152000487	.	0	.
chr12	112127168	112127669	.	0	.
chr11	116661297	116661798	.	0	.
chr19	44282465	44282966	.	0	.
chr7	107594770	107595271	.	0	.
chr15	74923440	74923941	.	0	.
chr1	125508546	125509047	.	0	.
chr2	153561683	153562184	.	0	.
chr4	123633259	123633760	.	0	.
chr15	73512123	73512624	.	0	.
chr19	10391932	10392433	.	0	.
chr18	82545397	82545898	.	0	.
chr2	32608413	32608914	.	0	.
chr2	105074088	105074589	.	0	.
chr11	69800724	69801225	.	0	.
chr8	72455129	72455630	.	0	.
chr18	61953470	61953971	.	0	.
chr5	148740860	148741361	.	0	.
chr1	37917653	37918154	.	0	.
chr17	5997857	5998358	.	0	.
chr4	101607512	101608013	.	0	.
chr3	88006658	88007159	.	0	.
chr2	166127674	166128175	.	0	.
chr6	83381851	83382352	.	0	.
chr6	108531944	108532445	.	0	.
chr1	133368451	133368952	.	0	.
chr15	77784412	77784913	.	0	.
chr16	10349779	10350280	.	0	.
chr3	135521934	135522435	.	0	.
chr17	26618566	26619067	.	0	.
chr4	148164047	148164548	.	0	.
chr2	92423675	92424176	.	0	.
chr6	127529433	127529934	.	0	.
chr2	125279942	125280443	.	0	.
chr11	50753599	50754100	.	0	.
chr8	105378576	105379077	.	0	.
chr3	108200858	108201359	.	0	.
chr15	102114800	102115301	.	0	.
chr10	59949297	59949798	.	0	.
chr11	98384974	98385475	.	0	.
chr18	12490576	12491077	.	0	.
chr5	129743739	129744240	.	0	.
chr13	112067280	112067781	.	0	.
chr6	120159010	120159511	.	0	.
chr1	134709744	134710245	.	0	.
chr1	93009156	93009657	.	0	.
chr5	148409466	148409967	.	0	.
chr17	29251925	29252426	.	0	.
chr12	108035513	108036014	.	0	.
chr5	23922850	23923351	.	0	.
chr17	25541721	25542222	.	0	.
chr10	127322385	127322886	.	0	.
chr2	130717785	130718286	.	0	.
chr9	102717360	102717861	.	0	.
chr17	25867791	25868292	.	0	.
chr6	53069980	53070481	.	0	.
chr1	132326625	132327126	.	0	.
chr1	191855408	191855909	.	0	.
chr3	142318076	142318577	.	0	.
chrX	113297917	113298418	.	0	.
chrX	7878024	7878525	.	0	.
chr8	125910433	125910934	.	0	.
chr15	84510059	84510560	.	0	.
chr7	46082698	46083199	.	0	.
chr9	114767908	114768409	.	0	.
chr9	98651634	98652135	.	0	.
chr15	101941811	101942312	.	0	.
chr7	139087767	139088268	.	0	.
chr12	111513694	111514195	.	0	.
chr13	72198609	72199110	.	0	.
chr12	84805444	84805945	.	0	.
chr4	128903817	128904318	.	0	.
chr7	19771041	19771542	.	0	.
chr3	122482189	122482690	.	0	.
chr2	153914151	153914652	.	0	.
chr18	38406136	38406637	.	0	.
chr17	88965955	88966456	.	0	.
chr13	35740883	35741384	.	0	.
chr5	117363272	117363773	.	0	.
chr12	78099750	78100251	.	0	.
chr1	52817513	52818014	.	0	.
chr2	145675156	145675657	.	0	.
chr2	120024238	120024739	.	0	.
chr8	125385670	125386171	.	0	.
chr5	35169560	35170061	.	0	.
chr5	124919794	124920295	.	0	.
chr14	26357224	26357725	.	0	.
chr4	148871730	148872231	.	0	.
chr5	116446558	116447059	.	0	.
chr3	108401631	108402132	.	0	.
chr11	50669421	50669922	.	0	.
chr7	49247838	49248339	.	0	.
chr13	95034025	95034526	.	0	.
chr14	59550817	59551318	.	0	.
chr6	47337923	47338424	.	0	.
chr7	98121677	98122178	.	0	.
chr7	139300295	139300796	.	0	.
chr6	84581090	84581591	.	0	.
chr13	95891113	95891614	.	0	.
chr10	81344665	81345166	.	0	.
chr13	38152641	38153142	.	0	.
chr4	56638824	56639325	.	0	.
chr18	38918473	38918974	.	0	.
chr18	23415086	23415587	.	0	.
chr1	135132365	135132866	.	0	.
chr2	24935382	24935883	.	0	.
chr12	33129358	33129859	.	0	.
chr6	99087513	99088014	.	0	.
chr5	145104292	145104793	.	0	.
chr13	47277100	47277601	.	0	.
chr15	64073940	64074441	.	0	.
chr5	118696349	118696850	.	0	.
chr15	88867439	88867940	.	0	.
chr6	51710751	51711252	.	0	.
chr1	84513191	84513692	.	0	.
chr1	182071999	182072500	.	0	.
chrX	102251875	102252376	.	0	.
chr4	148353908	148354409	.	0	.
chr1	180870186	180870687	.	0	.
chr15	97517839	97518340	.	0	.
chr18	60694552	60695053	.	0	.
chr3	69922985	69923486	.	0	.
chr16	92346761	92347262	.	0	.
chr4	119241020	119241521	.	0	.
chr8	94995926	94996427	.	0	.
chr4	119244363	119244864	.	0	.
chr9	30896731	30897232	.	0	.
chr15	81000256	81000757	.	0	.
chr11	99065802	99066303	.	0	.
chr13	73160205	73160706	.	0	.
chr6	31627884	31628385	.	0	.
chr2	171969537	171970038	.	0	.
chr9	22327797	22328298	.	0	.
chr19	41674316	41674817	.	0	.
chr14	52235056	52235557	.	0	.
chr3	95232729	95233230	.	0	.
chr15	76242967	76243468	.	0	.
chr5	120467054	120467555	.	0	.
chr4	120271198	120271699	.	0	.
chr5	125167094	125167595	.	0	.
chr17	78322525	78323026	.	0	.
chr7	132683826	132684327	.	0	.
chr5	34251708	34252209	.	0	.
chr3	132471149	132471650	.	0	.
chr2	164436665	164437166	.	0	.
chr10	41934598	41935099	.	0	.
chr1	151338856	151339357	.	0	.
chr17	31260391	31260892	.	0	.
chr8	22596977	22597478	.	0	.
chr1	126925444	126925945	.	0	.
chr8	83578627	83579128	.	0	.
chr1	74337190	74337691	.	0	.
chr6	32261268	32261769	.	0	.
chr11	67588838	67589339	.	0	.
chr7	81057470	81057971	.	0	.
chr4	70251710	70252211	.	0	.
chr8	4193214	4193715	.	0	.
chr10	81533323	81533824	.	0	.
chr19	53427455	53427956	.	0	.
chr13	54780550	54781051	.	0	.
chr7	137048481	137048982	.	0	.
chr1	177447054	177447555	.	0	.
chr18	10052234	10052735	.	0	.
chr10	60948544	60949045	.	0	.
chr11	75282443	75282944	.	0	.
chr18	60613268	60613769	.	0	.
chr15	58028539	58029040	.	0	.
chr8	72700481	72700982	.	0	.
chr9	21791812	21792313	.	0	.
chr8	123342157	123342658	.	0	.
chr17	56153624	56154125	.	0	.
chr9	64049969	64050470	.	0	.
chr11	109349805	109350306	.	0	.
chr15	89110146	89110647	.	0	.
chr19	34879163	34879664	.	0	.
chr11	79039417	79039918	.	0	.
chr16	28880769	28881270	.	0	.
chr15	36210472	36210973	.	0	.
chr18	36348407	36348908	.	0	.
chr11	117120060	117120561	.	0	.
chr9	108275163	108275664	.	0	.
chr14	30561754	30562255	.	0	.
chr11	113619039	113619540	.	0	.
chr3	67515341	67515842	.	0	.
chr8	121911703	121912204	.	0	.
chr10	80134388	80134889	.	0	.
chr16	17085669	17086170	.	0	.
chr1	119386150	119386651	.	0	.
chr11	112802792	112803293	.	0	.
chr18	34809046	34809547	.	0	.
chr5	36830377	36830878	.	0	.
chr9	46454891	46455392	.	0	.
chr7	135542955	135543456	.	0	.
chr12	12828218	12828719	.	0	.
chr13	94285284	94285785	.	0	.
chr7	29354112	29354613	.	0	.
chr4	138816180	138816681	.	0	.
chr6	83867074	83867575	.	0	.
chr14	31438104	31438605	.	0	.
chr17	55931919	55932420	.	0	.
chr9	31176347	31176848	.	0	.
chr12	28805021	28805522	.	0	.
chr9	96783177	96783678	.	0	.
chr4	130174542	130175043	.	0	.
chr4	152318794	152319295	.	0	.
chr11	113166535	113167036	.	0	.
chr7	64728130	64728631	.	0	.
chr9	56893970	56894471	.	0	.
chr17	33919233	33919734	.	0	.
chr5	93005433	93005934	.	0	.
chr2	30440612	30441113	.	0	.
chr8	122274513	122275014	.	0	.
chr7	19542000	19542501	.	0	.
chr5	124025829	124026330	.	0	.
chr11	32604991	32605492	.	0	.
chr8	80610459	80610960	.	0	.
chr18	76953037	76953538	.	0	.
chr4	62514874	62515375	.	0	.
chr8	122667864	122668365	.	0	.
chr9	24973954	24974455	.	0	.
chr8	120331205	120331706	.	0	.
chr16	91847484	91847985	.	0	.
chr2	153561123	153561624	.	0	.
chr7	141506780	141507281	.	0	.
chr1	85981951	85982452	.	0	.
chr7	25781426	25781927	.	0	.
chr10	99286755	99287256	.	0	.
chr5	96412841	96413342	.	0	.
chr15	96768488	96768989	.	0	.
chr17	28042194	28042695	.	0	.
chr6	16957062	16957563	.	0	.
chr17	83843649	83844150	.	0	.
chr7	138909529	138910030	.	0	.
chr5	120174204	120174705	.	0	.
chr14	55003870	55004371	.	0	.
chr2	117571010	117571511	.	0	.
chr5	104374269	104374770	.	0	.
chr1	133222552	133223053	.	0	.
chr1	88639406	88639907	.	0	.
chr6	97409696	97410197	.	0	.
chr8	104435941	104436442	.	0	.
chr1	74024680	74025181	.	0	.
chr11	58126318	58126819	.	0	.
chr5	138846379	138846880	.	0	.
chr2	153425362	153425863	.	0	.
chr7	65892202	65892703	.	0	.
chr11	116839463	116839964	.	0	.
chr10	121055389	121055890	.	0	.
chr1	37694515	37695016	.	0	.
chr14	59677554	59678055	.	0	.
chr9	42109877	42110378	.	0	.
chr4	118266269	118266770	.	0	.
chr9	64394146	64394647	.	0	.
chr10	79802207	79802708	.	0	.
chr5	124964015	124964516	.	0	.
chr1	118627627	118628128	.	0	.
chr13	98206257	98206758	.	0	.
chr4	130055094	130055595	.	0	.
chr11	8582343	8582844	.	0	.
chr6	134089879	134090380	.	0	.
chr8	123764595	123765096	.	0	.
chr5	134435883	134436384	.	0	.
chr6	23079944	23080445	.	0	.
chr8	68277248	68277749	.	0	.
chr12	99306142	99306643	.	0	.
chr3	121320810	121321311	.	0	.
chr11	116110080	116110581	.	0	.
chr12	102607989	102608490	.	0	.
chr17	47762364	47762865	.	0	.
chr4	59329807	59330308	.	0	.
chr5	113951509	113952010	.	0	.
chr10	79683025	79683526	.	0	.
chr8	84738193	84738694	.	0	.
chr10	62261061	62261562	.	0	.
chr1	192246604	192247105	.	0	.
chr11	97035979	97036480	.	0	.
chr19	46528859	46529360	.	0	.
chr10	80259792	80260293	.	0	.
chr13	112861989	112862490	.	0	.
chr9	45382142	45382643	.	0	.
chr15	97809891	97810392	.	0	.
chr8	40963105	40963606	.	0	.
chr16	34993466	34993967	.	0	.
chr2	125061358	125061859	.	0	.
chr19	3321513	3322014	.	0	.
chr3	68583911	68584412	.	0	.
chr9	108057093	108057594	.	0	.
chr2	122575431	122575932	.	0	.
chr2	174273164	174273665	.	0	.
chr19	25286021	25286522	.	0	.
chr19	24224652	24225153	.	0	.
chr17	25592884	25593385	.	0	.
chr16	16212984	16213485	.	0	.
chr7	142055345	142055846	.	0	.
chr17	49539120	49539621	.	0	.
chr13	100552509	100553010	.	0	.
chr1	34096871	34097372	.	0	.
chr4	128747808	128748309	.	0	.
chr17	24402265	24402766	.	0	.
chr17	29831625	29832126	.	0	.
chr2	158732472	158732973	.	0	.
chr10	68282983	68283484	.	0	.
chr3	61002447	61002948	.	0	.
chr2	20936747	20937248	.	0	.
chr15	25633869	25634370	.	0	.
chrX	93968380	93968881	.	0	.
chr5	36379860	36380361	.	0	.
chr11	118985360	118985861	.	0	.
chr15	76189793	76190294	.	0	.
chr18	67933693	67934194	.	0	.
chr5	120133266	120133767	.	0	.
chr3	134240209	134240710	.	0	.
chr16	30966633	30967134	.	0	.
chr11	67896956	67897457	.	0	.
chr6	128300287	128300788	.	0	.
chr2	174442518	174443019	.	0	.
chr2	118682412	118682913	.	0	.
chr4	119462783	119463284	.	0	.
chr10	89344855	89345356	.	0	.
chr2	158708090	158708591	.	0	.
chr15	77827364	77827865	.	0	.
chr13	55511366	55511867	.	0	.
chr18	73858953	73859454	.	0	.
chr2	166115800	166116301	.	0	.
chr1	36636426	36636927	.	0	.
chr7	79568922	79569423	.	0	.
chr7	125969142	125969643	.	0	.
chr5	110474224	110474725	.	0	.
chr15	25654859	25655360	.	0	.
chr17	65702018	65702519	.	0	.
chr19	57204149	57204650	.	0	.
chr13	51379574	51380075	.	0	.
chr8	108755447	108755948	.	0	.
chr5	30614159	30614660	.	0	.
chr15	80062832	80063333	.	0	.
chr11	89186785	89187286	.	0	.
chr2	158666886	158667387	.	0	.
chr6	91686515	91687016	.	0	.
chr11	112770392	112770893	.	0	.
chr7	4836226	4836727	.	0	.
chr11	96937462	96937963	.	0	.
chr2	160941108	160941609	.	0	.
chr2	180228542	180229043	.	0	.
chr5	116453348	116453849	.	0	.
chr2	91656741	91657242	.	0	.
chr5	118645155	118645656	.	0	.
chr12	5213718	5214219	.	0	.
chr10	18482631	18483132	.	0	.
chr10	77150971	77151472	.	0	.
chr13	38152088	38152589	.	0	.
chr2	158741590	158742091	.	0	.
chr17	70738171	70738672	.	0	.
chr13	48782673	48783174	.	0	.
chr17	79614968	79615469	.	0	.
chr11	75462775	75463276	.	0	.
chr16	73471491	73471992	.	0	.
chr4	123565322	123565823	.	0	.
chr9	22259382	22259883	.	0	.
chr2	35687876	35688377	.	0	.
chr8	84388641	84389142	.	0	.
chr7	101871483	101871984	.	0	.
chr2	122657769	122658270	.	0	.
chr15	36924154	36924655	.	0	.
chr5	113765540	113766041	.	0	.
chr16	32645336	32645837	.	0	.
chr15	80401169	80401670	.	0	.
chr2	32173883	32174384	.	0	.
chr4	137930923	137931424	.	0	.
chr14	79661057	79661558	.	0	.
chr4	128887653	128888154	.	0	.
chr17	79949921	79950422	.	0	.
chr11	35948445	35948946	.	0	.
chr9	45361854	45362355	.	0	.
chr15	80053347	80053848	.	0	.
chr8	111445660	111446161	.	0	.
chr8	94967037	94967538	.	0	.
chr2	125685024	125685525	.	0	.
chr17	13743627	13744128	.	0	.
chr14	30530586	30531087	.	0	.
chr7	144055107	144055608	.	0	.
chr15	85969675	85970176	.	0	.
chr4	32337632	32338133	.	0	.
chr11	120223552	120224053	.	0	.
chr13	51776998	51777499	.	0	.
chr13	59646510	59647011	.	0	.
chr14	54885902	54886403	.	0	.
chr19	44881028	44881529	.	0	.
chr5	112499080	112499581	.	0	.
chr1	92744797	92745298	.	0	.
chr14	103471097	103471598	.	0	.
chr15	100198860	100199361	.	0	.
chr16	94472437	94472938	.	0	.
chr4	107347179	107347680	.	0	.
chrX	7428748	7429249	.	0	.
chr1	167393333	167393834	.	0	.
chr19	4498478	4498979	.	0	.
chr14	66990504	66991005	.	0	.
chr11	55015808	55016309	.	0	.
chr5	113133149	113133650	.	0	.
chr9	62451935	62452436	.	0	.
chr8	88930336	88930837	.	0	.
chr19	44332797	44333298	.	0	.
chr2	119803509	119804010	.	0	.
chr3	27505514	27506015	.	0	.
chr1	57989314	57989815	.	0	.
chr1	134232828	134233329	.	0	.
chr11	120134903	120135404	.	0	.
chr6	120516588	120517089	.	0	.
chr13	70876853	70877354	.	0	.
chr5	93045018	93045519	.	0	.
chr18	61360470	61360971	.	0	.
chr1	132327413	132327914	.	0	.
chr5	135351784	135352285	.	0	.
chr14	75789318	75789819	.	0	.
chr2	152001535	152002036	.	0	.
chr4	154961911	154962412	.	0	.
chr12	30373073	30373574	.	0	.
chr7	83902799	83903300	.	0	.
chr1	74774050	74774551	.	0	.
chr4	62583182	62583683	.	0	.
chr9	103234694	103235195	.	0	.
chr13	56434335	56434836	.	0	.
chr3	27183636	27184137	.	0	.
chr10	79773072	79773573	.	0	.
chr11	114679444	114679945	.	0	.
chr6	145953225	145953726	.	0	.
chr14	55657856	55658357	.	0	.
chr14	69190366	69190867	.	0	.
chr1	191296354	191296855	.	0	.
chr13	24268329	24268830	.	0	.
chr4	149081461	149081962	.	0	.
chr10	60108176	60108677	.	0	.
chr5	128935274	128935775	.	0	.
chr4	133070797	133071298	.	0	.
chr4	107468142	107468643	.	0	.
chr10	127924763	127925264	.	0	.
chr17	23675633	23676134	.	0	.
chr10	72959998	72960499	.	0	.
chr2	122354491	122354992	.	0	.
chr8	34097297	34097798	.	0	.
chr7	30295099	30295600	.	0	.
chr16	10893120	10893621	.	0	.
chr18	75298303	75298804	.	0	.
chr11	102195962	102196463	.	0	.
chr1	155236571	155237072	.	0	.
chr11	79666579	79667080	.	0	.
chr2	129226447	129226948	.	0	.
chr8	117116073	117116574	.	0	.
chr4	131918498	131918999	.	0	.
chr9	108267616	108268117	.	0	.
chr3	122462535	122463036	.	0	.
chr14	7792011	7792512	.	0	.
chr7	138853285	138853786	.	0	.
chr16	32656718	32657219	.	0	.
chr11	68882122	68882623	.	0	.
chr4	108350741	108351242	.	0	.
chr6	82723282	82723783	.	0	.
chr4	155473236	155473737	.	0	.
chr17	70780877	70781378	.	0	.
chr13	54581989	54582490	.	0	.
chr2	35719120	35719621	.	0	.
chr7	127912511	127913012	.	0	.
chr9	81863430	81863931	.	0	.
chr4	141828121	141828622	.	0	.
chr15	57659920	57660421	.	0	.
chr2	168658567	168659068	.	0	.
chr9	27300127	27300628	.	0	.
chr8	70564698	70565199	.	0	.
chr18	75295250	75295751	.	0	.
chr4	141882795	141883296	.	0	.
chr18	58055953	58056454	.	0	.
chr4	138737017	138737518	.	0	.
chr3	101506147	101506648	.	0	.
chr5	110797666	110798167	.	0	.
chr4	128794234	128794735	.	0	.
chr3	27430832	27431333	.	0	.
chr9	31988791	31989292	.	0	.
chr9	64018417	64018918	.	0	.
chr10	7154338	7154839	.	0	.
chr14	31230432	31230933	.	0	.
chr10	74922752	74923253	.	0	.
chr14	30650878	30651379	.	0	.
chr7	134679616	134680117	.	0	.
chr3	68765114	68765615	.	0	.
chr11	96269826	96270327	.	0	.
chr17	26584447	26584948	.	0	.
chr19	10909355	10909856	.	0	.
chr18	20059020	20059521	.	0	.
chr19	26604178	26604679	.	0	.
chr15	51854096	51854597	.	0	.
chr11	105469091	105469592	.	0	.
chr19	4604259	4604760	.	0	.
chr9	56516672	56517173	.	0	.
chr9	15525197	15525698	.	0	.
chr7	132733497	132733998	.	0	.
chr8	94984101	94984602	.	0	.
chr15	80027409	80027910	.	0	.
chr7	105767593	105768094	.	0	.
chr11	98933154	98933655	.	0	.
chr3	145987549	145988050	.	0	.
chr1	152528168	152528669	.	0	.
chr7	142549853	142550354	.	0	.
chr6	100288501	100289002	.	0	.
chr17	12163834	12164335	.	0	.
chr2	145832354	145832855	.	0	.
chr4	130315637	130316138	.	0	.
chr18	11815209	11815710	.	0	.
chr2	163195747	163196248	.	0	.
chr13	41457417	41457918	.	0	.
chr4	120230241	120230742	.	0	.
chr1	74030913	74031414	.	0	.
chr12	111430751	111431252	.	0	.
chr7	44359958	44360459	.	0	.
chr5	30711314	30711815	.	0	.
chr18	76948795	76949296	.	0	.
chr8	122665635	122666136	.	0	.
chr13	108214111	108214612	.	0	.
chr7	64048527	64049028	.	0	.
chr11	103142325	103142826	.	0	.
chr8	117356218	117356719	.	0	.
chr5	5342306	5342807	.	0	.
chr10	127893399	127893900	.	0	.
chr2	91652747	91653248	.	0	.
chr11	105153226	105153727	.	0	.
chr18	75578233	75578734	.	0	.
chr15	79952622	79953123	.	0	.
chr7	127689754	127690255	.	0	.
chr7	45689678	45690179	.	0	.
chr5	113981912	113982413	.	0	.
chr4	32430772	32431273	.	0	.
chr6	84392997	84393498	.	0	.
chr12	76874755	76875256	.	0	.
chr7	112316136	112316637	.	0	.
chr11	119128064	119128565	.	0	.
chr4	137933297	137933798	.	0	.
chr5	63936672	63937173	.	0	.
chr3	84647668	84648169	.	0	.
chr19	25497310	25497811	.	0	.
chr11	67645095	67645596	.	0	.
chr14	52005565	52006066	.	0	.
chr9	75004111	75004612	.	0	.
chr6	54706735	54707236	.	0	.
chr1	11413954	11414455	.	0	.
chr5	122741453	122741954	.	0	.
chr5	111790411	111790912	.	0	.
chr1	134320939	134321440	.	0	.
chr15	31392039	31392540	.	0	.
chr2	118665228	118665729	.	0	.
chr1	63107480	63107981	.	0	.
chr11	119381592	119382093	.	0	.
chr4	99929201	99929702	.	0	.
chr5	88587478	88587979	.	0	.
chr8	125902465	125902966	.	0	.
chr8	72720512	72721013	.	0	.
chr4	133407377	133407878	.	0	.
chr11	69706689	69707190	.	0	.
chr5	124043497	124043998	.	0	.
chr13	99279330	99279831	.	0	.
chr8	68880462	68880963	.	0	.
chr8	123446733	123447234	.	0	.
chr11	113714993	113715494	.	0	.
chr12	110991522	110992023	.	0	.
chr5	117995378	117995879	.	0	.
chr7	120190247	120190748	.	0	.
chr5	53213702	53214203	.	0	.
chr5	37163100	37163601	.	0	.
chr17	28048365	28048866	.	0	.
chr5	21263610	21264111	.	0	.
chr8	119660967	119661468	.	0	.
chr6	70824389	70824890	.	0	.
chr7	111711111	111711612	.	0	.
chr15	64073416	64073917	.	0	.
chr17	65740090	65740591	.	0	.
chr5	114364955	114365456	.	0	.
chr11	8675573	8676074	.	0	.
chr7	49605823	49606324	.	0	.
chr3	98071121	98071622	.	0	.
chr14	60528937	60529438	.	0	.
chr15	59629038	59629539	.	0	.
chr7	118788447	118788948	.	0	.
chr5	115183367	115183868	.	0	.
chr4	34966559	34967060	.	0	.
chr18	24861386	24861887	.	0	.
chr5	73130928	73131429	.	0	.
chr7	98147782	98148283	.	0	.
chr16	30490751	30491252	.	0	.
chr1	119422136	119422637	.	0	.
chrX	20291595	20292096	.	0	.
chr15	85702300	85702801	.	0	.
chr8	106561008	106561509	.	0	.
chr9	44135311	44135812	.	0	.
chr18	52941913	52942414	.	0	.
chr17	32479507	32480008	.	0	.
chr19	60113610	60114111	.	0	.
chr4	135494377	135494878	.	0	.
chr1	86527829	86528330	.	0	.
chr4	89140811	89141312	.	0	.
chr4	120615757	120616258	.	0	.
chr2	33222444	33222945	.	0	.
chr17	49738434	49738935	.	0	.
chr2	35165479	35165980	.	0	.
chr4	119959304	119959805	.	0	.
chr5	110361398	110361899	.	0	.
chr9	65154629	65155130	.	0	.
chr17	65648586	65649087	.	0	.
chr14	66854907	66855408	.	0	.
chr18	6282276	6282777	.	0	.
chr9	47458905	47459406	.	0	.
chr11	102219823	102220324	.	0	.
chr1	134222073	134222574	.	0	.
chr16	23224562	23225063	.	0	.
chr5	105518999	105519500	.	0	.
chr2	6212813	6213314	.	0	.
chr6	4902744	4903245	.	0	.
chr5	151346581	151347082	.	0	.
chr5	123417123	123417624	.	0	.
chr5	122171278	122171779	.	0	.
chr1	152702863	152703364	.	0	.
chr2	145816958	145817459	.	0	.
chr4	155284630	155285131	.	0	.
chr4	125936287	125936788	.	0	.
chr17	25539490	25539991	.	0	.
chr14	45772882	45773383	.	0	.
chr18	65518951	65519452	.	0	.
chr2	52437925	52438426	.	0	.
chr11	98965971	98966472	.	0	.
chr8	124921762	124922263	.	0	.
chr10	117519734	117520235	.	0	.
chr13	37830733	37831234	.	0	.
chr5	117360756	117361257	.	0	.
chr4	82447192	82447693	.	0	.
chr7	109576498	109576999	.	0	.
chr6	119329294	119329795	.	0	.
chr1	168382752	168383253	.	0	.
chr8	118104737	118105238	.	0	.
chr5	74205445	74205946	.	0	.
chr15	100108340	100108841	.	0	.
chr5	115568740	115569241	.	0	.
chr2	30251605	30252106	.	0	.
chr11	98975006	98975507	.	0	.
chr11	119134429	119134930	.	0	.
chr1	120270108	120270609	.	0	.
chr10	69579551	69580052	.	0	.
chr15	76457219	76457720	.	0	.
chr5	122760805	122761306	.	0	.
chr7	111710537	111711038	.	0	.
chr19	7072524	7073025	.	0	.
chr9	61945933	61946434	.	0	.
chr8	3394455	3394956	.	0	.
chr11	88364759	88365260	.	0	.
chr7	100925032	100925533	.	0	.
chr9	71628936	71629437	.	0	.
chr8	121417891	121418392	.	0	.
chr7	19361745	19362246	.	0	.
chr4	109225106	109225607	.	0	.
chrX	12928112	12928613	.	0	.
chr18	60705925	60706426	.	0	.
chr11	52274712	52275213	.	0	.
chr6	89358214	89358715	.	0	.
chr7	144454874	144455375	.	0	.
chr4	124400721	124401222	.	0	.
chr2	164867067	164867568	.	0	.
chr14	46882309	46882810	.	0	.
chr1	155239858	155240359	.	0	.
chr2	25127154	25127655	.	0	.
chr4	140977569	140978070	.	0	.
chr16	35907467	35907968	.	0	.
chr16	30687591	30688092	.	0	.
chr5	66151308	66151809	.	0	.
chr14	73502802	73503303	.	0	.
chr14	30637713	30638214	.	0	.
chr19	17356376	17356877	.	0	.
chr4	8510097	8510598	.	0	.
chr18	60710530	60711031	.	0	.
chr4	133595513	133596014	.	0	.
chr9	50746271	50746772	.	0	.
chr4	118138832	118139333	.	0	.
chr7	99357145	99357646	.	0	.
chr15	101584544	101585045	.	0	.
chr11	101078110	101078611	.	0	.
chr16	84774084	84774585	.	0	.
chr14	32165487	32165988	.	0	.
chr11	116626650	116627151	.	0	.
chr14	55092188	55092689	.	0	.
chr5	23672210	23672711	.	0	.
chr15	97812072	97812573	.	0	.
chr2	105126229	105126730	.	0	.
chr19	25385942	25386443	.	0	.
chr7	67446522	67447023	.	0	.
chr9	105697778	105698279	.	0	.
chr7	38224825	38225326	.	0	.
chr9	77910427	77910928	.	0	.
chr14	121283613	121284114	.	0	.
chr4	109406080	109406581	.	0	.
chr16	30513608	30514109	.	0	.
chr2	167048174	167048675	.	0	.
chr7	118827925	118828426	.	0	.
chr5	112382006	112382507	.	0	.
chr16	91632351	91632852	.	0	.
chr14	40906713	40907214	.	0	.
chr19	25605970	25606471	.	0	.
chr12	55443087	55443588	.	0	.
chr5	148580473	148580974	.	0	.
chr4	41755253	41755754	.	0	.
chr11	32000152	32000653	.	0	.
chr9	79714401	79714902	.	0	.
chr15	79899908	79900409	.	0	.
chr3	107793461	107793962	.	0	.
chr17	24473584	24474085	.	0	.
chr13	81633006	81633507	.	0	.
chr5	149136904	149137405	.	0	.
chr11	5037381	5037882	.	0	.
chr13	113615652	113616153	.	0	.
chr13	113614926	113615427	.	0	.
chr9	29922601	29923102	.	0	.
chr6	119418703	119419204	.	0	.
chr1	63262942	63263443	.	0	.
chr18	73122342	73122843	.	0	.
chr10	80538912	80539413	.	0	.
chr10	115587242	115587743	.	0	.
chr8	3467404	3467905	.	0	.
chr11	88670528	88671029	.	0	.
chr10	12868095	12868596	.	0	.
chr4	118262818	118263319	.	0	.
chr18	24429067	24429568	.	0	.
chr14	27350271	27350772	.	0	.
chr2	28415467	28415968	.	0	.
chr4	150446572	150447073	.	0	.
chr19	5668878	5669379	.	0	.
chr1	93686333	93686834	.	0	.
chr4	136708686	136709187	.	0	.
chr1	87258400	87258901	.	0	.
chr5	92809025	92809526	.	0	.
chr3	83841314	83841815	.	0	.
chr1	119422641	119423142	.	0	.
chr4	125190883	125191384	.	0	.
chrX	71052075	71052576	.	0	.
chr2	34899551	34900052	.	0	.
chr4	138250011	138250512	.	0	.
chr10	61374834	61375335	.	0	.
chr7	30972943	30973444	.	0	.
chr17	35720906	35721407	.	0	.
chr6	116107354	116107855	.	0	.
chr8	123734447	123734948	.	0	.
chr6	55403789	55404290	.	0	.
chr11	67644473	67644974	.	0	.
chr11	107248745	107249246	.	0	.
chr17	74338457	74338958	.	0	.
chr2	173739970	173740471	.	0	.
chr4	56829616	56830117	.	0	.
chr7	48995190	48995691	.	0	.
chr4	133400089	133400590	.	0	.
chr7	141215529	141216030	.	0	.
chr17	35813161	35813662	.	0	.
chr11	113285033	113285534	.	0	.
chr6	127188734	127189235	.	0	.
chr16	33337168	33337669	.	0	.
chr9	64084992	64085493	.	0	.
chr9	45328258	45328759	.	0	.
chr3	95174126	95174627	.	0	.
chr5	135399233	135399734	.	0	.
chr5	92812822	92813323	.	0	.
chr8	80856514	80857015	.	0	.
chr19	46356643	46357144	.	0	.
chr5	150594341	150594842	.	0	.
chr10	58652778	58653279	.	0	.
chr2	108622750	108623251	.	0	.
chr1	152609541	152610042	.	0	.
chr9	63398587	63399088	.	0	.
chr12	10391079	10391580	.	0	.
chr8	8619497	8619998	.	0	.
chr4	57556964	57557465	.	0	.
chr5	35055039	35055540	.	0	.
chrX	94022774	94023275	.	0	.
chr8	11482346	11482847	.	0	.
chr8	70647268	70647769	.	0	.
chr14	21848086	21848587	.	0	.
chr12	12680336	12680837	.	0	.
chr5	25613803	25614304	.	0	.
chr11	35587056	35587557	.	0	.
chr15	102445094	102445595	.	0	.
chr15	76462186	76462687	.	0	.
chr1	160044339	160044840	.	0	.
chr7	135537494	135537995	.	0	.
chr8	84728350	84728851	.	0	.
chr17	71598529	71599030	.	0	.
chr11	50212963	50213464	.	0	.
chr8	46741011	46741512	.	0	.
chr4	34882755	34883256	.	0	.
chr14	27335732	27336233	.	0	.
chr15	79391654	79392155	.	0	.
chr19	44311894	44312395	.	0	.
chr13	99194340	99194841	.	0	.
chr3	79842710	79843211	.	0	.
chr8	4404835	4405336	.	0	.
chr7	109276578	109277079	.	0	.
chr19	9234617	9235118	.	0	.
chr6	127188167	127188668	.	0	.
chr3	51348495	51348996	.	0	.
chr13	53176737	53177238	.	0	.
chr9	21526000	21526501	.	0	.
chr15	87963353	87963854	.	0	.
chr2	32174405	32174906	.	0	.
chr8	123333802	123334303	.	0	.
chr14	79486578	79487079	.	0	.
chr4	129810816	129811317	.	0	.
chr5	135118456	135118957	.	0	.
chr3	88636626	88637127	.	0	.
chr15	7531240	7531741	.	0	.
chr8	68881154	68881655	.	0	.
chr9	105521120	105521621	.	0	.
chr14	79737604	79738105	.	0	.
chr18	76073063	76073564	.	0	.
chr8	115764472	115764973	.	0	.
chr5	138995746	138996247	.	0	.
chr5	124446396	124446897	.	0	.
chr2	32131181	32131682	.	0	.
chr5	134418245	134418746	.	0	.
chr18	75322295	75322796	.	0	.
chr7	112720245	112720746	.	0	.
chr18	20557785	20558286	.	0	.
chr3	89959378	89959879	.	0	.
chr7	116034349	116034850	.	0	.
chr9	57279433	57279934	.	0	.
chr7	81868042	81868543	.	0	.
chr16	94850390	94850891	.	0	.
chr6	35288873	35289374	.	0	.
chr7	84409416	84409917	.	0	.
chr7	135539396	135539897	.	0	.
chr9	22225705	22226206	.	0	.
chr8	88447224	88447725	.	0	.
chr3	122246000	122246501	.	0	.
[truncated: 29,842 more rows]

## Sheet: Leydig.DAR
chr12	76612642	76613143	.	0	.
chr7	139961071	139961572	.	0	.
chr14	63164583	63165084	.	0	.
chr5	34535032	34535533	.	0	.
chr9	58036868	58037369	.	0	.
chr8	87783156	87783657	.	0	.
chr17	56999350	56999851	.	0	.
chr11	104130603	104131104	.	0	.
chr5	113164818	113165319	.	0	.
chr2	93456073	93456574	.	0	.
chr14	25505251	25505752	.	0	.
chr17	25867791	25868292	.	0	.
chr4	148938498	148938999	.	0	.
chr8	104309278	104309779	.	0	.
chr6	84385635	84386136	.	0	.
chr17	46667804	46668305	.	0	.
chr2	127000362	127000863	.	0	.
chr4	154496936	154497437	.	0	.
chr1	192246604	192247105	.	0	.
chr6	112488821	112489322	.	0	.
chr12	8379638	8380139	.	0	.
chr6	124960969	124961470	.	0	.
chr2	35171157	35171658	.	0	.
chr10	127581236	127581737	.	0	.
chr13	114896668	114897169	.	0	.
chr4	128778020	128778521	.	0	.
chr6	115975540	115976041	.	0	.
chr10	81420224	81420725	.	0	.
chr3	30535950	30536451	.	0	.
chr4	101378251	101378752	.	0	.
chr7	30359909	30360410	.	0	.
chr15	80053898	80054399	.	0	.
chr16	33596070	33596571	.	0	.
chr6	89350139	89350640	.	0	.
chr14	20729831	20730332	.	0	.
chr9	46480170	46480671	.	0	.
chr16	10590004	10590505	.	0	.
chr4	134897128	134897629	.	0	.
chr3	88354344	88354845	.	0	.
chr14	34620628	34621129	.	0	.
chr4	62744506	62745007	.	0	.
chr2	25633573	25634074	.	0	.
chr8	70272986	70273487	.	0	.
chr11	104269365	104269866	.	0	.
chr4	117161937	117162438	.	0	.
chr15	86203958	86204459	.	0	.
chr9	109116262	109116763	.	0	.
chr14	63067673	63068174	.	0	.
chr5	113164074	113164575	.	0	.
chr19	4498478	4498979	.	0	.
chr3	107931530	107932031	.	0	.
chr11	97448399	97448900	.	0	.
chr9	120016947	120017448	.	0	.
chr7	132673923	132674424	.	0	.
chr7	125873308	125873809	.	0	.
chr15	73733234	73733735	.	0	.
chr15	84265125	84265626	.	0	.
chr9	118590104	118590605	.	0	.
chr17	48457089	48457590	.	0	.
chr5	119329466	119329967	.	0	.
chr11	101927862	101928363	.	0	.
chr11	54071710	54072211	.	0	.
chr19	5867910	5868411	.	0	.
chr11	4719977	4720478	.	0	.
chr16	92579050	92579551	.	0	.
chr3	65871146	65871647	.	0	.
chr2	103896050	103896551	.	0	.
chr9	110277538	110278039	.	0	.
chr7	130910697	130911198	.	0	.
chr9	63941655	63942156	.	0	.
chr2	69810098	69810599	.	0	.
chr5	140906585	140907086	.	0	.
chr8	13503868	13504369	.	0	.
chr9	110366639	110367140	.	0	.
chr4	107091621	107092122	.	0	.
chr4	117849864	117850365	.	0	.
chr3	104795585	104796086	.	0	.
chr2	155278319	155278820	.	0	.
chr9	58014740	58015241	.	0	.
chr9	106265627	106266128	.	0	.
chr7	133007306	133007807	.	0	.
chr5	110466836	110467337	.	0	.
chr8	124480362	124480863	.	0	.
chr18	10940943	10941444	.	0	.
chr5	139378915	139379416	.	0	.
chr1	92212341	92212842	.	0	.
chr5	35739856	35740357	.	0	.
chr17	5246683	5247184	.	0	.
chr2	167687525	167688026	.	0	.
chr13	23695882	23696383	.	0	.
chr2	163939475	163939976	.	0	.
chr17	70988360	70988861	.	0	.
chr7	144179344	144179845	.	0	.
chr1	75398784	75399285	.	0	.
chr5	64517831	64518332	.	0	.
chr7	30295099	30295600	.	0	.
chr4	151345887	151346388	.	0	.
chr10	80876803	80877304	.	0	.
chr2	127655913	127656414	.	0	.
chr1	93009156	93009657	.	0	.
chr17	25169687	25170188	.	0	.
chr6	29020877	29021378	.	0	.
chr3	101513639	101514140	.	0	.
chr4	130130694	130131195	.	0	.
chr16	20237372	20237873	.	0	.
chr17	31727078	31727579	.	0	.
chr17	13487725	13488226	.	0	.
chr2	163318098	163318599	.	0	.
chr1	135470464	135470965	.	0	.
chr18	76072523	76073024	.	0	.
chr5	49525212	49525713	.	0	.
chr5	114436713	114437214	.	0	.
chr4	118247250	118247751	.	0	.
chr11	104131716	104132217	.	0	.
chr15	77980927	77981428	.	0	.
chr17	35303741	35304242	.	0	.
chr5	35538098	35538599	.	0	.
chr10	39543696	39544197	.	0	.
chr7	126099381	126099882	.	0	.
chr4	130125777	130126278	.	0	.
chr8	13506767	13507268	.	0	.
chr5	115971078	115971579	.	0	.
chr11	104099443	104099944	.	0	.
chr3	96820309	96820810	.	0	.
chr9	48055243	48055744	.	0	.
chr8	120685121	120685622	.	0	.
chr5	134678709	134679210	.	0	.
chr19	5763187	5763688	.	0	.
chr2	32380023	32380524	.	0	.
chr14	30541518	30542019	.	0	.
chr11	36204460	36204961	.	0	.
chr19	55562982	55563483	.	0	.
chr6	17177010	17177511	.	0	.
chr10	80707268	80707769	.	0	.
chr13	73759618	73760119	.	0	.
chr14	24036003	24036504	.	0	.
chr17	88791668	88792169	.	0	.
chr7	4850798	4851299	.	0	.
chr19	4270077	4270578	.	0	.
chr12	91837620	91838121	.	0	.
chr2	113806743	113807244	.	0	.
chr1	36539107	36539608	.	0	.
chr1	194885603	194886104	.	0	.
chr4	138819022	138819523	.	0	.
chr2	131141287	131141788	.	0	.
chr11	90355130	90355631	.	0	.
chr17	32359912	32360413	.	0	.
chr9	109097791	109098292	.	0	.
chr1	76535376	76535877	.	0	.
chr1	87273586	87274087	.	0	.
chr19	6952680	6953181	.	0	.
chr7	139467113	139467614	.	0	.
chr1	21280213	21280714	.	0	.
chr18	11470690	11471191	.	0	.
chr8	122265464	122265965	.	0	.
chr12	108827700	108828201	.	0	.
chr8	117388342	117388843	.	0	.
chr3	131580997	131581498	.	0	.
chr6	127942418	127942919	.	0	.
chr8	121981415	121981916	.	0	.
chr8	26915675	26916176	.	0	.
chr11	100515081	100515582	.	0	.
chr8	120750541	120751042	.	0	.
chr18	39119970	39120471	.	0	.
chr4	151339514	151340015	.	0	.
chr6	88905697	88906198	.	0	.
chr9	108117096	108117597	.	0	.
chr6	145335945	145336446	.	0	.
chr4	149393492	149393993	.	0	.
chr5	35055039	35055540	.	0	.
chr10	62192590	62193091	.	0	.
chr9	109103055	109103556	.	0	.
chr6	115985604	115986105	.	0	.
chr4	117165932	117166433	.	0	.
chr12	105850607	105851108	.	0	.
chr15	81774512	81775013	.	0	.
chr6	71991175	71991676	.	0	.
chr6	89354655	89355156	.	0	.
chr18	57124113	57124614	.	0	.
chr6	85856169	85856670	.	0	.
chr7	128672361	128672862	.	0	.
chr2	168214935	168215436	.	0	.
chr12	25163360	25163861	.	0	.
chr5	113066610	113067111	.	0	.
chr13	53548311	53548812	.	0	.
chr3	95011971	95012472	.	0	.
chr5	142448608	142449109	.	0	.
chr4	152253639	152254140	.	0	.
chr4	107217491	107217992	.	0	.
chr14	120366935	120367436	.	0	.
chr5	75428060	75428561	.	0	.
chr2	129226447	129226948	.	0	.
chr13	37929491	37929992	.	0	.
chr7	78658035	78658536	.	0	.
chr8	47845822	47846323	.	0	.
chr16	33241930	33242431	.	0	.
chr19	10968480	10968981	.	0	.
chr5	5668845	5669346	.	0	.
chr1	131980451	131980952	.	0	.
chr4	41394621	41395122	.	0	.
chr7	35042792	35043293	.	0	.
chr17	5510509	5511010	.	0	.
chr5	76707984	76708485	.	0	.
chr2	157395739	157396240	.	0	.
chr19	41303791	41304292	.	0	.
chr2	91035313	91035814	.	0	.
chr5	117437866	117438367	.	0	.
chr11	52447158	52447659	.	0	.
chr12	83493985	83494486	.	0	.
chr8	120270466	120270967	.	0	.
chr1	39963700	39964201	.	0	.
chr5	66166157	66166658	.	0	.
chr4	43558600	43559101	.	0	.
chr6	48415567	48416068	.	0	.
chr17	33966085	33966586	.	0	.
chr9	61470776	61471277	.	0	.
chr2	153423029	153423530	.	0	.
chr9	118873513	118874014	.	0	.
chr1	126484623	126485124	.	0	.
chr2	38621586	38622087	.	0	.
chr5	35064092	35064593	.	0	.
chr5	110474224	110474725	.	0	.
chr13	95805683	95806184	.	0	.
chr8	71717148	71717649	.	0	.
chr5	49524639	49525140	.	0	.
chr7	144620991	144621492	.	0	.
chr2	167861074	167861575	.	0	.
chr10	81328187	81328688	.	0	.
chr15	93201870	93202371	.	0	.
chr7	44250818	44251319	.	0	.
chr14	70020071	70020572	.	0	.
chr17	31468476	31468977	.	0	.
chr2	6072059	6072560	.	0	.
chr11	75948658	75949159	.	0	.
chr11	78372566	78373067	.	0	.
chr2	167964358	167964859	.	0	.
chr10	108113514	108114015	.	0	.
chr12	83420295	83420796	.	0	.
chr11	53483444	53483945	.	0	.
chr6	84567609	84568110	.	0	.
chr2	106650182	106650683	.	0	.
chr2	32095524	32096025	.	0	.
chr19	6230342	6230843	.	0	.
chr3	41552869	41553370	.	0	.
chr7	27610808	27611309	.	0	.
chr5	125344206	125344707	.	0	.
chr19	25286021	25286522	.	0	.
chr5	125315041	125315542	.	0	.
chr16	95718105	95718606	.	0	.
chr4	125459751	125460252	.	0	.
chr6	112245563	112246064	.	0	.
chr11	117777962	117778463	.	0	.
chr12	8358320	8358821	.	0	.
chr2	118510349	118510850	.	0	.
chr8	87730935	87731436	.	0	.
chr14	77823265	77823766	.	0	.
chr19	41288120	41288621	.	0	.
chr2	180185649	180186150	.	0	.
chr5	35070188	35070689	.	0	.
chr5	121876851	121877352	.	0	.
chr16	90735454	90735955	.	0	.
chr11	120071699	120072200	.	0	.
chr1	91448604	91449105	.	0	.
chr6	90549786	90550287	.	0	.
chr11	99141585	99142086	.	0	.
chr5	134164626	134165127	.	0	.
chr6	85906912	85907413	.	0	.
chr5	114406529	114407030	.	0	.
chr4	33189212	33189713	.	0	.
chr19	58810471	58810972	.	0	.
chr11	3431837	3432338	.	0	.
chr10	61832619	61833120	.	0	.
chr4	153560935	153561436	.	0	.
chr17	83194435	83194936	.	0	.
chr6	15720343	15720844	.	0	.
chr15	80350401	80350902	.	0	.
chr4	108629255	108629756	.	0	.
chr4	117863858	117864359	.	0	.
chr7	19830651	19831152	.	0	.
chr9	35335797	35336298	.	0	.
chr16	33916604	33917105	.	0	.
chr6	90691834	90692335	.	0	.
chr4	41545902	41546403	.	0	.
chr15	82184134	82184635	.	0	.
chr16	33176766	33177267	.	0	.
chr13	3877693	3878194	.	0	.
chr18	21651835	21652336	.	0	.
chr1	191839340	191839841	.	0	.
chr11	102791876	102792377	.	0	.
chr4	141749508	141750009	.	0	.
chr2	167538631	167539132	.	0	.
chr10	84855438	84855939	.	0	.
chr4	117873575	117874076	.	0	.
chr2	107118634	107119135	.	0	.
chr8	119436853	119437354	.	0	.
chr7	99215384	99215885	.	0	.
chr1	180415031	180415532	.	0	.
chr6	145175505	145176006	.	0	.
chr5	43113734	43114235	.	0	.
chr7	100922469	100922970	.	0	.
chr3	131251091	131251592	.	0	.
chr5	135940545	135941046	.	0	.
chr5	21901352	21901853	.	0	.
chr4	133269461	133269962	.	0	.
chr4	57844917	57845418	.	0	.
chr14	34588450	34588951	.	0	.
chr11	115318557	115319058	.	0	.
chr11	116621097	116621598	.	0	.
chr7	99304821	99305322	.	0	.
chr4	125122270	125122771	.	0	.
chr2	28031903	28032404	.	0	.
chr2	130015177	130015678	.	0	.
chr8	12730665	12731166	.	0	.
chr6	88926717	88927218	.	0	.
chr12	100275801	100276302	.	0	.
chr12	3385830	3386331	.	0	.
chr12	108882673	108883174	.	0	.
chr13	37601001	37601502	.	0	.
chr15	84094935	84095436	.	0	.
chr5	24981745	24982246	.	0	.
chr9	58020629	58021130	.	0	.
chr8	119904389	119904890	.	0	.
chr7	118788447	118788948	.	0	.
chr11	78929257	78929758	.	0	.
chr14	101507253	101507754	.	0	.
chr17	67629069	67629570	.	0	.
chr9	21691898	21692399	.	0	.
chr2	38719318	38719819	.	0	.
chr10	77229508	77230009	.	0	.
chr17	47298361	47298862	.	0	.
chr12	81146775	81147276	.	0	.
chr11	77836621	77837122	.	0	.
chr8	70564698	70565199	.	0	.
chr14	67852908	67853409	.	0	.
chr2	167485618	167486119	.	0	.
chr15	84592192	84592693	.	0	.
chr1	92638097	92638598	.	0	.
chr12	76609030	76609531	.	0	.
chr6	134807706	134808207	.	0	.
chr17	67869645	67870146	.	0	.
chr12	105458672	105459173	.	0	.
chr13	55548400	55548901	.	0	.
chr1	182373708	182374209	.	0	.
chr3	131637640	131638141	.	0	.
chr12	29280138	29280639	.	0	.
chr15	31237374	31237875	.	0	.
chr5	35069322	35069823	.	0	.
chr17	12268617	12269118	.	0	.
chr12	76612076	76612577	.	0	.
chr13	9648702	9649203	.	0	.
chr16	94208189	94208690	.	0	.
chr17	15291445	15291946	.	0	.
chr19	6324786	6325287	.	0	.
chr19	42601366	42601867	.	0	.
chr2	120069083	120069584	.	0	.
chr3	95284450	95284951	.	0	.
chr7	97420877	97421378	.	0	.
chr2	158734409	158734910	.	0	.
chr7	80177901	80178402	.	0	.
chr5	124349027	124349528	.	0	.
chr18	77185126	77185627	.	0	.
chr6	112492717	112493218	.	0	.
chr12	5176972	5177473	.	0	.
chr17	24495918	24496419	.	0	.
chr6	71772542	71773043	.	0	.
chr16	34456307	34456808	.	0	.
chr11	94137659	94138160	.	0	.
chr8	120339676	120340177	.	0	.
chr8	69956610	69957111	.	0	.
chr3	122453840	122454341	.	0	.
chr7	143320395	143320896	.	0	.
chr4	141632022	141632523	.	0	.
chr10	39506788	39507289	.	0	.
chr5	35647546	35648047	.	0	.
chr3	27192034	27192535	.	0	.
chr11	4729576	4730077	.	0	.
chr5	125452491	125452992	.	0	.
chr17	35141875	35142376	.	0	.
chr4	151449991	151450492	.	0	.
chr12	8321427	8321928	.	0	.
chr5	107238062	107238563	.	0	.
chr19	10122017	10122518	.	0	.
chr1	133364812	133365313	.	0	.
chr7	143832197	143832698	.	0	.
chr9	58012282	58012783	.	0	.
chr12	112223568	112224069	.	0	.
chr15	78443596	78444097	.	0	.
chr11	116384138	116384639	.	0	.
chr8	11821705	11822206	.	0	.
chr19	3654019	3654520	.	0	.
chr4	123213920	123214421	.	0	.
chr9	44703369	44703870	.	0	.
chr10	121382137	121382638	.	0	.
chr1	39348768	39349269	.	0	.
chr6	85232781	85233282	.	0	.
chr8	68276409	68276910	.	0	.
chr8	123499781	123500282	.	0	.
chr6	38702823	38703324	.	0	.
chr17	29595771	29596272	.	0	.
chr5	137613505	137614006	.	0	.
chr12	112861897	112862398	.	0	.
chr2	127603530	127604031	.	0	.
chr5	114573014	114573515	.	0	.
chr18	56565744	56566245	.	0	.
chr1	132770720	132771221	.	0	.
chr11	100643799	100644300	.	0	.
chr16	90738065	90738566	.	0	.
chr13	100808869	100809370	.	0	.
chr5	122171278	122171779	.	0	.
chr7	126046309	126046810	.	0	.
chr7	19444824	19445325	.	0	.
chr1	180889809	180890310	.	0	.
chr9	96823870	96824371	.	0	.
chr2	27596215	27596716	.	0	.
chr3	100473103	100473604	.	0	.
chr2	167706405	167706906	.	0	.
chr18	75493373	75493874	.	0	.
chr9	51963312	51963813	.	0	.
chr3	38732410	38732911	.	0	.
chr1	119234376	119234877	.	0	.
chr11	65728802	65729303	.	0	.
chr4	154603741	154604242	.	0	.
chr2	167659910	167660411	.	0	.
chr6	37406925	37407426	.	0	.
chr2	131745324	131745825	.	0	.
chr4	130163373	130163874	.	0	.
chr4	151668976	151669477	.	0	.
chr9	102759585	102760086	.	0	.
chr6	97144257	97144758	.	0	.
chr2	131538299	131538800	.	0	.
chr12	5246666	5247167	.	0	.
chr9	106311584	106312085	.	0	.
chr2	93187293	93187794	.	0	.
chr3	119195641	119196142	.	0	.
chr5	35540447	35540948	.	0	.
chr14	75642036	75642537	.	0	.
chr19	17692688	17693189	.	0	.
chr7	38267263	38267764	.	0	.
chr15	80342934	80343435	.	0	.
chr9	45338271	45338772	.	0	.
chr13	51858415	51858916	.	0	.
chr12	110936175	110936676	.	0	.
chr2	173018569	173019070	.	0	.
chr5	63936672	63937173	.	0	.
chr7	133623039	133623540	.	0	.
chr15	76580753	76581254	.	0	.
chr7	66405356	66405857	.	0	.
chr2	155630901	155631402	.	0	.
chr9	23464888	23465389	.	0	.
chr6	83147223	83147724	.	0	.
chr3	84460807	84461308	.	0	.
chr4	154018135	154018636	.	0	.
chr12	87279273	87279774	.	0	.
chr5	35073970	35074471	.	0	.
chr5	35720467	35720968	.	0	.
chr14	30650878	30651379	.	0	.
chr5	138846379	138846880	.	0	.
chr15	102114800	102115301	.	0	.
chr2	93032615	93033116	.	0	.
chr4	137765628	137766129	.	0	.
chr6	116672300	116672801	.	0	.
chr8	119636669	119637170	.	0	.
chr10	124176354	124176855	.	0	.
chr19	56760479	56760980	.	0	.
chr8	121856144	121856645	.	0	.
chr7	120838665	120839166	.	0	.
chr6	145181910	145182411	.	0	.
chr7	126967254	126967755	.	0	.
chr13	46019869	46020370	.	0	.
chr5	36571371	36571872	.	0	.
chr6	87213201	87213702	.	0	.
chr9	58199566	58200067	.	0	.
chr18	39359748	39360249	.	0	.
chr13	53576352	53576853	.	0	.
chr8	105295748	105296249	.	0	.
chr1	156006919	156007420	.	0	.
chr19	6247397	6247898	.	0	.
chr2	29814729	29815230	.	0	.
chr1	172288922	172289423	.	0	.
chr10	76832785	76833286	.	0	.
chr12	87398054	87398555	.	0	.
chr2	180466458	180466959	.	0	.
chr3	101551570	101552071	.	0	.
chr15	85869289	85869790	.	0	.
chr5	135076336	135076837	.	0	.
chr4	134753897	134754398	.	0	.
chr9	58011579	58012080	.	0	.
chr4	141623656	141624157	.	0	.
chr11	53441903	53442404	.	0	.
chr4	125017403	125017904	.	0	.
chr1	75469443	75469944	.	0	.
chr15	25785687	25786188	.	0	.
chr11	54939975	54940476	.	0	.
chr7	45006550	45007051	.	0	.
chr1	136513127	136513628	.	0	.
chr4	128887653	128888154	.	0	.
chr6	72370029	72370530	.	0	.
chr12	110648326	110648827	.	0	.
chr7	140899123	140899624	.	0	.
chr5	114408707	114409208	.	0	.
chr11	34771163	34771664	.	0	.
chr10	80332022	80332523	.	0	.
chr12	103353555	103354056	.	0	.
chr2	11568443	11568944	.	0	.
chr19	53437200	53437701	.	0	.
chr4	133552829	133553330	.	0	.
chr8	84132559	84133060	.	0	.
chr12	86483327	86483828	.	0	.
chr11	96837297	96837798	.	0	.
chr2	93416765	93417266	.	0	.
chr2	165296497	165296998	.	0	.
chr8	25819212	25819713	.	0	.
chr2	181036342	181036843	.	0	.
chr5	142739935	142740436	.	0	.
chr18	70632896	70633397	.	0	.
chr4	133553911	133554412	.	0	.
chr11	96857463	96857964	.	0	.
chr11	79039417	79039918	.	0	.
chr2	91305517	91306018	.	0	.
chr7	4647217	4647718	.	0	.
chr7	126098854	126099355	.	0	.
chr10	86636812	86637313	.	0	.
chr2	167445831	167446332	.	0	.
chr8	122475050	122475551	.	0	.
chr9	40300527	40301028	.	0	.
chr4	43447229	43447730	.	0	.
chr1	127942197	127942698	.	0	.
chr1	167422540	167423041	.	0	.
chr13	99466898	99467399	.	0	.
chr14	11775174	11775675	.	0	.
chr4	137960660	137961161	.	0	.
chr1	133367731	133368232	.	0	.
chr1	75387539	75388040	.	0	.
chr4	149951158	149951659	.	0	.
chr1	159419136	159419637	.	0	.
chr1	179831360	179831861	.	0	.
chr11	116347413	116347914	.	0	.
chr17	29731548	29732049	.	0	.
chr7	127689754	127690255	.	0	.
chr12	25310306	25310807	.	0	.
chr9	40300007	40300508	.	0	.
chr4	135658468	135658969	.	0	.
chr1	154178492	154178993	.	0	.
chr7	67689707	67690208	.	0	.
chr4	105198680	105199181	.	0	.
chr13	48782673	48783174	.	0	.
chr5	35189043	35189544	.	0	.
chr4	43399014	43399515	.	0	.
chr12	29100020	29100521	.	0	.
chr7	142055345	142055846	.	0	.
chr14	69823220	69823721	.	0	.
chr7	130569023	130569524	.	0	.
chr7	122015058	122015559	.	0	.
chr4	62742997	62743498	.	0	.
chr6	145173749	145174250	.	0	.
chr2	33271908	33272409	.	0	.
chr19	55164965	55165466	.	0	.
chr1	93098877	93099378	.	0	.
chr2	169758600	169759101	.	0	.
chr4	62888744	62889245	.	0	.
chr8	119719169	119719670	.	0	.
chr9	114767908	114768409	.	0	.
chr6	29214258	29214759	.	0	.
chr6	125585821	125586322	.	0	.
chr3	127512770	127513271	.	0	.
chr14	122350737	122351238	.	0	.
chr6	128177079	128177580	.	0	.
chr10	80810039	80810540	.	0	.
chr6	112397278	112397779	.	0	.
chr19	47511891	47512392	.	0	.
chr3	65830800	65831301	.	0	.
chr5	143316634	143317135	.	0	.
chr5	21914707	21915208	.	0	.
chr15	85724582	85725083	.	0	.
chr4	153561470	153561971	.	0	.
chr17	29576744	29577245	.	0	.
chr18	12758739	12759240	.	0	.
chr3	51413185	51413686	.	0	.
chr4	135550876	135551377	.	0	.
chr4	149159609	149160110	.	0	.
chr6	107566891	107567392	.	0	.
chr9	51954656	51955157	.	0	.
chr1	167223237	167223738	.	0	.
chr7	112615235	112615736	.	0	.
chr2	119370043	119370544	.	0	.
chr5	125317247	125317748	.	0	.
chr4	33261231	33261732	.	0	.
chr1	120265043	120265544	.	0	.
chr7	79771599	79772100	.	0	.
chr15	80035430	80035931	.	0	.
chr7	74365423	74365924	.	0	.
chr15	85520899	85521400	.	0	.
chr10	62211264	62211765	.	0	.
chr13	74218398	74218899	.	0	.
chr19	6248013	6248514	.	0	.
chr6	120188419	120188920	.	0	.
chr8	94557218	94557719	.	0	.
chr12	112670939	112671440	.	0	.
chr11	120184278	120184779	.	0	.
chr9	58030017	58030518	.	0	.
chr5	35743224	35743725	.	0	.
chr3	122482189	122482690	.	0	.
chr18	60595055	60595556	.	0	.
chr16	92516012	92516513	.	0	.
chr11	76430202	76430703	.	0	.
chr6	71990528	71991029	.	0	.
chr19	43671063	43671564	.	0	.
chr8	121461151	121461652	.	0	.
chr10	42951853	42952354	.	0	.
chr2	153305128	153305629	.	0	.
chr17	29193496	29193997	.	0	.
chr11	59897869	59898370	.	0	.
chr8	110372728	110373229	.	0	.
chr2	158741078	158741579	.	0	.
chr4	129993926	129994427	.	0	.
chr4	139257307	139257808	.	0	.
chr7	144008030	144008531	.	0	.
chr9	98817521	98818022	.	0	.
chr4	143066871	143067372	.	0	.
chr15	58986438	58986939	.	0	.
chr13	96719875	96720376	.	0	.
chr17	14213936	14214437	.	0	.
chr15	58999461	58999962	.	0	.
chr7	16601542	16602043	.	0	.
chr11	100569718	100570219	.	0	.
chr8	69135482	69135983	.	0	.
chr9	51070734	51071235	.	0	.
chr6	115960149	115960650	.	0	.
chr2	166605410	166605911	.	0	.
chr5	135035766	135036267	.	0	.
chr11	52377475	52377976	.	0	.
chr17	87339263	87339764	.	0	.
chr2	60688995	60689496	.	0	.
chr8	107227037	107227538	.	0	.
chr1	16268927	16269428	.	0	.
chr14	25497569	25498070	.	0	.
chr1	92440341	92440842	.	0	.
chr14	23835653	23836154	.	0	.
chr17	28431748	28432249	.	0	.
chr17	34810568	34811069	.	0	.
chr5	30551137	30551638	.	0	.
chr5	113751194	113751695	.	0	.
chr14	55657856	55658357	.	0	.
chr4	56831939	56832440	.	0	.
chr17	40880024	40880525	.	0	.
chr3	27183636	27184137	.	0	.
chr3	152114736	152115237	.	0	.
chr2	167254118	167254619	.	0	.
chr15	99723856	99724357	.	0	.
chr9	90197046	90197547	.	0	.
chr6	124728496	124728997	.	0	.
chr5	29485256	29485757	.	0	.
chr4	149886686	149887187	.	0	.
chr4	126957392	126957893	.	0	.
chr4	134772775	134773276	.	0	.
chr11	97387915	97388416	.	0	.
chr1	133264353	133264854	.	0	.
chr5	30578752	30579253	.	0	.
chr9	83485884	83486385	.	0	.
chr6	89119494	89119995	.	0	.
chr8	13665311	13665812	.	0	.
chr7	80166697	80167198	.	0	.
chr15	89279732	89280233	.	0	.
chr12	31917240	31917741	.	0	.
chr11	4764381	4764882	.	0	.
chr6	113599658	113600159	.	0	.
chr11	102581348	102581849	.	0	.
chr10	80790554	80791055	.	0	.
chr8	87450074	87450575	.	0	.
chr2	31953652	31954153	.	0	.
chr11	55397284	55397785	.	0	.
chr6	127529433	127529934	.	0	.
chr18	35675367	35675868	.	0	.
chr19	56425430	56425931	.	0	.
chr16	39102170	39102671	.	0	.
chr15	79322677	79323178	.	0	.
chr8	25808256	25808757	.	0	.
chr9	30896731	30897232	.	0	.
chr13	51868377	51868878	.	0	.
chr2	49805970	49806471	.	0	.
chr4	125929875	125930376	.	0	.
chr8	22537553	22538054	.	0	.
chr3	98267133	98267634	.	0	.
chr4	148940565	148941066	.	0	.
chr16	38965692	38966193	.	0	.
chr17	11962818	11963319	.	0	.
chr5	143489646	143490147	.	0	.
chr11	60197786	60198287	.	0	.
chr18	68493746	68494247	.	0	.
chr10	42120803	42121304	.	0	.
chr14	31400229	31400730	.	0	.
chr5	144158731	144159232	.	0	.
chr16	4932490	4932991	.	0	.
chr10	127591321	127591822	.	0	.
chr8	44962721	44963222	.	0	.
chr10	80541085	80541586	.	0	.
chr1	65017040	65017541	.	0	.
chr2	92349955	92350456	.	0	.
chr17	25126931	25127432	.	0	.
chr4	49041693	49042194	.	0	.
chr5	34916638	34917139	.	0	.
chr16	17280423	17280924	.	0	.
chr9	54642091	54642592	.	0	.
chr10	127147084	127147585	.	0	.
chr11	117776047	117776548	.	0	.
chr11	104024627	104025128	.	0	.
chr13	37970701	37971202	.	0	.
chr2	93232047	93232548	.	0	.
chr8	83926202	83926703	.	0	.
chr8	122902586	122903087	.	0	.
chr8	119941403	119941904	.	0	.
chr9	114381268	114381769	.	0	.
chr1	152051824	152052325	.	0	.
chr8	105596517	105597018	.	0	.
chr5	99339790	99340291	.	0	.
chr3	95894219	95894720	.	0	.
chr15	76188128	76188629	.	0	.
chr11	52275692	52276193	.	0	.
chr11	120051449	120051950	.	0	.
chr17	56902609	56903110	.	0	.
chr15	88919330	88919831	.	0	.
chr5	66090083	66090584	.	0	.
chr2	156658081	156658582	.	0	.
chr2	11571120	11571621	.	0	.
chr6	90550489	90550990	.	0	.
chr8	105929394	105929895	.	0	.
chr2	153470006	153470507	.	0	.
chr5	125056175	125056676	.	0	.
chr17	65648586	65649087	.	0	.
chr7	29137387	29137888	.	0	.
chr10	17880617	17881118	.	0	.
chr16	11072379	11072880	.	0	.
chr13	41336253	41336754	.	0	.
chr12	84285010	84285511	.	0	.
chr4	40798731	40799232	.	0	.
chr4	128617199	128617700	.	0	.
chr7	98148960	98149461	.	0	.
chr6	145112739	145113240	.	0	.
chr11	97525263	97525764	.	0	.
chr5	112298526	112299027	.	0	.
chr7	79308706	79309207	.	0	.
chr8	105944082	105944583	.	0	.
chr15	85900406	85900907	.	0	.
chr8	70758538	70759039	.	0	.
chr11	69456911	69457412	.	0	.
chr5	125224906	125225407	.	0	.
chr2	28465923	28466424	.	0	.
chr17	8546306	8546807	.	0	.
chr17	47955125	47955626	.	0	.
chr7	65906719	65907220	.	0	.
chr2	93099703	93100204	.	0	.
chr15	78437583	78438084	.	0	.
chr2	172670256	172670757	.	0	.
chr7	111179547	111180048	.	0	.
chr9	21481013	21481514	.	0	.
chr9	103259258	103259759	.	0	.
chr7	19004789	19005290	.	0	.
chr9	96783177	96783678	.	0	.
chr9	119084353	119084854	.	0	.
chr18	36665802	36666303	.	0	.
chr5	23964780	23965281	.	0	.
chr5	150031914	150032415	.	0	.
chr2	157508955	157509456	.	0	.
chr7	43346423	43346924	.	0	.
chr19	56993255	56993756	.	0	.
chr7	31100668	31101169	.	0	.
chr9	45224682	45225183	.	0	.
chr4	120277105	120277606	.	0	.
chr5	117820361	117820862	.	0	.
chr6	51429082	51429583	.	0	.
chr6	145768617	145769118	.	0	.
chr7	29355323	29355824	.	0	.
chr1	151943198	151943699	.	0	.
chr18	35043134	35043635	.	0	.
chr9	63711407	63711908	.	0	.
chr1	180987736	180988237	.	0	.
chr16	92330874	92331375	.	0	.
chr17	56030156	56030657	.	0	.
chr2	132689605	132690106	.	0	.
chr2	163001350	163001851	.	0	.
chr4	130313380	130313881	.	0	.
chr4	4195143	4195644	.	0	.
chr4	130312448	130312949	.	0	.
chr17	28591463	28591964	.	0	.
chr9	115220412	115220913	.	0	.
chr15	85735141	85735642	.	0	.
chr13	103225424	103225925	.	0	.
chr5	36368555	36369056	.	0	.
chr11	120293682	120294183	.	0	.
chr2	153906602	153907103	.	0	.
chr8	110725036	110725537	.	0	.
chr4	125413798	125414299	.	0	.
chr5	146692564	146693065	.	0	.
chr11	69250019	69250520	.	0	.
chr10	60031592	60032093	.	0	.
chr4	43533309	43533810	.	0	.
chr11	95490038	95490539	.	0	.
chr1	154202522	154203023	.	0	.
chr8	121255810	121256311	.	0	.
chr7	113607770	113608271	.	0	.
chr11	82845646	82846147	.	0	.
chr9	75347931	75348432	.	0	.
chr14	45077156	45077657	.	0	.
chr5	142438415	142438916	.	0	.
chr12	26471274	26471775	.	0	.
chr2	27329340	27329841	.	0	.
chr17	71260577	71261078	.	0	.
chr7	66029013	66029514	.	0	.
chr9	50852729	50853230	.	0	.
chr7	144207870	144208371	.	0	.
chr14	62893149	62893650	.	0	.
chr4	108008488	108008989	.	0	.
chr2	142875824	142876325	.	0	.
chr5	117346869	117347370	.	0	.
chr4	125059010	125059511	.	0	.
chr11	53548126	53548627	.	0	.
chr3	122169525	122170026	.	0	.
chr11	116064387	116064888	.	0	.
chrX	73525044	73525545	.	0	.
chr2	129024760	129025261	.	0	.
chr6	91598861	91599362	.	0	.
chr8	94184259	94184760	.	0	.
chr4	134351324	134351825	.	0	.
chr16	31046133	31046634	.	0	.
chr2	172502234	172502735	.	0	.
chr7	135551430	135551931	.	0	.
chr7	30252881	30253382	.	0	.
chr15	31563765	31564266	.	0	.
chr16	22955602	22956103	.	0	.
chr13	37505918	37506419	.	0	.
chr1	179041752	179042253	.	0	.
chr19	46137093	46137594	.	0	.
chr2	163880868	163881369	.	0	.
chr14	34196713	34197214	.	0	.
chr7	46615549	46616050	.	0	.
chr19	46736955	46737456	.	0	.
chr8	110650819	110651320	.	0	.
chr17	69261165	69261666	.	0	.
chr18	80193757	80194258	.	0	.
chr8	34476139	34476640	.	0	.
chr12	3794102	3794603	.	0	.
chr8	87314472	87314973	.	0	.
chr17	33948883	33949384	.	0	.
chr11	46304795	46305296	.	0	.
chr8	70183169	70183670	.	0	.
chr18	77729963	77730464	.	0	.
chr1	135986369	135986870	.	0	.
chr15	74750332	74750833	.	0	.
chr9	58026967	58027468	.	0	.
chr17	28780883	28781384	.	0	.
chr19	4491205	4491706	.	0	.
chr17	15299973	15300474	.	0	.
chr19	10074180	10074681	.	0	.
chr10	81346592	81347093	.	0	.
chr12	99256530	99257031	.	0	.
chr8	84634849	84635350	.	0	.
chr7	121706382	121706883	.	0	.
chr19	42126053	42126554	.	0	.
chr11	102636798	102637299	.	0	.
chr1	183905312	183905813	.	0	.
chr10	67116190	67116691	.	0	.
chr1	134727220	134727721	.	0	.
chr1	82634363	82634864	.	0	.
chr11	69433309	69433810	.	0	.
chr11	70219051	70219552	.	0	.
chr15	74707123	74707624	.	0	.
chr19	6662650	6663151	.	0	.
chr2	106713235	106713736	.	0	.
chr2	153274772	153275273	.	0	.
chr8	25811959	25812460	.	0	.
chr9	68402936	68403437	.	0	.
chr9	89632312	89632813	.	0	.
chr11	55335390	55335891	.	0	.
chr10	62195418	62195919	.	0	.
chr19	3919200	3919701	.	0	.
chr19	6023860	6024361	.	0	.
chr1	55091836	55092337	.	0	.
chr8	111630080	111630581	.	0	.
chr10	42312514	42313015	.	0	.
chr8	117333518	117334019	.	0	.
chr7	19571821	19572322	.	0	.
chr5	121871407	121871908	.	0	.
chr14	118635469	118635970	.	0	.
chr11	54950711	54951212	.	0	.
chr5	135727053	135727554	.	0	.
chr19	3924117	3924618	.	0	.
chr2	24048325	24048826	.	0	.
chr11	78209876	78210377	.	0	.
chr14	31438104	31438605	.	0	.
chr12	32104359	32104860	.	0	.
chr18	34338889	34339390	.	0	.
chr14	76528494	76528995	.	0	.
chr8	36745768	36746269	.	0	.
chr1	132113810	132114311	.	0	.
chr19	38015418	38015919	.	0	.
chr6	91762234	91762735	.	0	.
chr6	136661461	136661962	.	0	.
chr13	69721040	69721541	.	0	.
chr11	59199810	59200311	.	0	.
chr10	80073054	80073555	.	0	.
chr4	151750805	151751306	.	0	.
chr8	119776829	119777330	.	0	.
chr14	75645268	75645769	.	0	.
chr11	4718499	4719000	.	0	.
chr2	29917496	29917997	.	0	.
chr2	32030538	32031039	.	0	.
chr12	110460140	110460641	.	0	.
chr17	10473104	10473605	.	0	.
chr18	12611194	12611695	.	0	.
chr5	145110278	145110779	.	0	.
chr14	77706815	77707316	.	0	.
chr7	44343489	44343990	.	0	.
chr11	63665114	63665615	.	0	.
chr9	110685552	110686053	.	0	.
chr4	134527856	134528357	.	0	.
chr11	118885672	118886173	.	0	.
chr12	112491821	112492322	.	0	.
chr18	12625218	12625719	.	0	.
chr9	102749177	102749678	.	0	.
chr11	114152401	114152902	.	0	.
chr12	112214264	112214765	.	0	.
chr1	74031498	74031999	.	0	.
chr4	132171008	132171509	.	0	.
chr16	33673466	33673967	.	0	.
chr12	33175824	33176325	.	0	.
chr1	154983224	154983725	.	0	.
chr9	57279433	57279934	.	0	.
chr9	90198700	90199201	.	0	.
chr19	46672797	46673298	.	0	.
chr2	75960602	75961103	.	0	.
chr10	63156901	63157402	.	0	.
chr11	75846501	75847002	.	0	.
chr16	30188944	30189445	.	0	.
chr16	94186539	94187040	.	0	.
chr2	144274637	144275138	.	0	.
chr8	68019036	68019537	.	0	.
chr2	26041069	26041570	.	0	.
chr18	15053934	15054435	.	0	.
chr1	35754078	35754579	.	0	.
chr1	192677088	192677589	.	0	.
chr17	25127477	25127978	.	0	.
chr12	102366118	102366619	.	0	.
chr9	115390878	115391379	.	0	.
chr1	192505754	192506255	.	0	.
chr14	47160178	47160679	.	0	.
chr12	17454918	17455419	.	0	.
chr11	79229053	79229554	.	0	.
chr13	20174272	20174773	.	0	.
chr2	145876120	145876621	.	0	.
chr18	57222139	57222640	.	0	.
chr9	118867046	118867547	.	0	.
chr14	33942101	33942602	.	0	.
chr2	91306028	91306529	.	0	.
chr16	4848047	4848548	.	0	.
chr13	112067280	112067781	.	0	.
chr11	50216698	50217199	.	0	.
chr13	92676079	92676580	.	0	.
chr7	67770763	67771264	.	0	.
chr7	120851575	120852076	.	0	.
chr9	96957019	96957520	.	0	.
chr10	8499072	8499573	.	0	.
chr12	111306759	111307260	.	0	.
chr17	74669444	74669945	.	0	.
chr2	93190593	93191094	.	0	.
chr10	128389508	128390009	.	0	.
chr13	54684050	54684551	.	0	.
chr16	10870943	10871444	.	0	.
chr5	123160321	123160822	.	0	.
chr11	115886387	115886888	.	0	.
chr11	102375784	102376285	.	0	.
chr10	74921389	74921890	.	0	.
chr7	144458848	144459349	.	0	.
chr11	78839439	78839940	.	0	.
chr12	43827186	43827687	.	0	.
chr18	15064857	15065358	.	0	.
chr2	154217070	154217571	.	0	.
chr3	85518589	85519090	.	0	.
chr5	90217785	90218286	.	0	.
chr5	121527021	121527522	.	0	.
chr6	35313274	35313775	.	0	.
chr6	55097983	55098484	.	0	.
chr9	40294790	40295291	.	0	.
chr9	45951944	45952445	.	0	.
chr14	72999091	72999592	.	0	.
chr4	106124837	106125338	.	0	.
chr12	105849121	105849622	.	0	.
chr5	112254216	112254717	.	0	.
chr10	77456487	77456988	.	0	.
chr17	56418197	56418698	.	0	.
chr8	85047400	85047901	.	0	.
chr12	8441076	8441577	.	0	.
chr7	125969142	125969643	.	0	.
chr17	69075409	69075910	.	0	.
chr14	26317426	26317927	.	0	.
chr12	101794344	101794845	.	0	.
chr5	124021089	124021590	.	0	.
chr11	84823440	84823941	.	0	.
chr15	85935665	85936166	.	0	.
chr14	27602077	27602578	.	0	.
chr2	35615769	35616270	.	0	.
chr4	137855677	137856178	.	0	.
chr5	30604827	30605328	.	0	.
chr11	43548067	43548568	.	0	.
chr2	180214523	180215024	.	0	.
chr7	45075201	45075702	.	0	.
chr8	123231430	123231931	.	0	.
chr14	118178809	118179310	.	0	.
chr4	148429017	148429518	.	0	.
chr11	108900696	108901197	.	0	.
chr12	5246112	5246613	.	0	.
chr19	5849158	5849659	.	0	.
chr3	31126786	31127287	.	0	.
chr2	93573370	93573871	.	0	.
chr15	73697927	73698428	.	0	.
chr7	102229805	102230306	.	0	.
chr1	157425969	157426470	.	0	.
chr4	114614149	114614650	.	0	.
chr5	114630474	114630975	.	0	.
chr8	87095082	87095583	.	0	.
chr1	180245690	180246191	.	0	.
chr4	155696816	155697317	.	0	.
chr11	85095064	85095565	.	0	.
chr16	38909539	38910040	.	0	.
chr8	119603658	119604159	.	0	.
chr14	34585183	34585684	.	0	.
chr8	35196258	35196759	.	0	.
chr11	102375232	102375733	.	0	.
chr2	93447437	93447938	.	0	.
chr14	121437025	121437526	.	0	.
chr7	64357352	64357853	.	0	.
chr17	56108618	56109119	.	0	.
chr3	89622674	89623175	.	0	.
chr3	115763214	115763715	.	0	.
chr9	98965048	98965549	.	0	.
chr15	82185981	82186482	.	0	.
chr11	121176177	121176678	.	0	.
chr12	85451975	85452476	.	0	.
chr2	38704899	38705400	.	0	.
chr10	75907884	75908385	.	0	.
chr4	55142126	55142627	.	0	.
chr1	44046560	44047061	.	0	.
chr10	81583360	81583861	.	0	.
chr15	76692560	76693061	.	0	.
chr8	70583329	70583830	.	0	.
chr16	17175665	17176166	.	0	.
chr6	31178145	31178646	.	0	.
chr4	98743776	98744277	.	0	.
chr1	181307981	181308482	.	0	.
chr11	100513683	100514184	.	0	.
chr18	80233324	80233825	.	0	.
chr5	72806227	72806728	.	0	.
chr6	125690140	125690641	.	0	.
chr8	120094701	120095202	.	0	.
chr3	41590611	41591112	.	0	.
chr9	73061963	73062464	.	0	.
chr9	118621752	118622253	.	0	.
chr5	110415789	110416290	.	0	.
chr8	36789493	36789994	.	0	.
chr17	84874455	84874956	.	0	.
chr6	147054459	147054960	.	0	.
chr8	124413617	124414118	.	0	.
chr7	141508208	141508709	.	0	.
chr7	142499013	142499514	.	0	.
chr17	67988915	67989416	.	0	.
chr15	36446334	36446835	.	0	.
chr4	15234036	15234537	.	0	.
chr17	56367836	56368337	.	0	.
chr3	142394628	142395129	.	0	.
chr17	56471044	56471545	.	0	.
chr1	132200595	132201096	.	0	.
chr16	38400676	38401177	.	0	.
chr1	181010456	181010957	.	0	.
chr15	101370242	101370743	.	0	.
chr8	83697257	83697758	.	0	.
chr7	128414261	128414762	.	0	.
chr1	21208937	21209438	.	0	.
chr7	132776711	132777212	.	0	.
chr9	62059934	62060435	.	0	.
chr9	70852932	70853433	.	0	.
chr14	121343551	121344052	.	0	.
chr2	119292766	119293267	.	0	.
chr1	39812133	39812634	.	0	.
chr6	55558065	55558566	.	0	.
chr1	21239899	21240400	.	0	.
chr10	60130266	60130767	.	0	.
chr10	76503044	76503545	.	0	.
chr12	105468469	105468970	.	0	.
chr13	55450454	55450955	.	0	.
chr14	50765670	50766171	.	0	.
chr16	3851250	3851751	.	0	.
chr16	87719671	87720172	.	0	.
chr2	12371342	12371843	.	0	.
chr2	27450207	27450708	.	0	.
chr4	149789387	149789888	.	0	.
chr6	136153449	136153950	.	0	.
chr7	82773928	82774429	.	0	.
chr8	11958612	11959113	.	0	.
chr9	51926304	51926805	.	0	.
chr9	83820918	83821419	.	0	.
chr11	75772504	75773005	.	0	.
chr15	81791828	81792329	.	0	.
chr19	53441691	53442192	.	0	.
chr5	147367897	147368398	.	0	.
chr8	119413478	119413979	.	0	.
chr5	124211179	124211680	.	0	.
chr3	84639704	84640205	.	0	.
chr2	27373302	27373803	.	0	.
chr2	32056784	32057285	.	0	.
chr19	10056174	10056675	.	0	.
chr14	49649148	49649649	.	0	.
chr10	4347505	4348006	.	0	.
chr4	135312539	135313040	.	0	.
chr16	18563634	18564135	.	0	.
chr6	113373411	113373912	.	0	.
chr8	122578776	122579277	.	0	.
chr4	57798260	57798761	.	0	.
chr5	125067589	125068090	.	0	.
chr15	62218072	62218573	.	0	.
chr12	3366865	3367366	.	0	.
chr9	62730401	62730902	.	0	.
chr11	120070493	120070994	.	0	.
chr18	61018322	61018823	.	0	.
chr7	16990259	16990760	.	0	.
chr5	125252549	125253050	.	0	.
chr9	40405942	40406443	.	0	.
chr10	61281524	61282025	.	0	.
chr2	154390187	154390688	.	0	.
chr6	87876211	87876712	.	0	.
chr9	56830245	56830746	.	0	.
chr14	60646426	60646927	.	0	.
chr7	64791989	64792490	.	0	.
chr1	120814115	120814616	.	0	.
chr11	68801054	68801555	.	0	.
chr11	120076089	120076590	.	0	.
chr7	45793174	45793675	.	0	.
chr8	71568507	71569008	.	0	.
chr13	95113801	95114302	.	0	.
chr7	16101818	16102319	.	0	.
chr1	132302788	132303289	.	0	.
chr7	64006977	64007478	.	0	.
chr13	63708025	63708526	.	0	.
chr15	76653314	76653815	.	0	.
chr6	84353440	84353941	.	0	.
chr16	21645812	21646313	.	0	.
chr12	76318450	76318951	.	0	.
chr14	76508013	76508514	.	0	.
chr6	124585706	124586207	.	0	.
chr4	155578383	155578884	.	0	.
chr1	55194454	55194955	.	0	.
chr15	100811769	100812270	.	0	.
chr17	45728307	45728808	.	0	.
chr11	58553414	58553915	.	0	.
chr13	51686804	51687305	.	0	.
chr15	78538980	78539481	.	0	.
chr4	43039089	43039590	.	0	.
chr2	156453845	156454346	.	0	.
chr15	73686594	73687095	.	0	.
chr7	80429142	80429643	.	0	.
chr3	95011435	95011936	.	0	.
chr5	73553836	73554337	.	0	.
chr15	77081430	77081931	.	0	.
chr15	85523622	85524123	.	0	.
chr8	121346881	121347382	.	0	.
chr1	155239858	155240359	.	0	.
chr15	25364428	25364929	.	0	.
chr9	21463216	21463717	.	0	.
chr15	76485091	76485592	.	0	.
chr14	55585069	55585570	.	0	.
chr4	40817852	40818353	.	0	.
chr16	89986082	89986583	.	0	.
chr17	12571242	12571743	.	0	.
chr11	72435560	72436061	.	0	.
chr13	60309831	60310332	.	0	.
chr9	40376656	40377157	.	0	.
chr9	40390903	40391404	.	0	.
chr17	10408551	10409052	.	0	.
chr8	104309832	104310333	.	0	.
chr8	125341545	125342046	.	0	.
chr13	109985743	109986244	.	0	.
chr14	77504706	77505207	.	0	.
chr17	79995321	79995822	.	0	.
chr3	100469296	100469797	.	0	.
chr5	115284355	115284856	.	0	.
chr17	29541423	29541924	.	0	.
chr11	104148693	104149194	.	0	.
chr2	134946936	134947437	.	0	.
chr14	45504372	45504873	.	0	.
chr10	59991155	59991656	.	0	.
chr12	32109204	32109705	.	0	.
chr17	24897582	24898083	.	0	.
chr7	138741833	138742334	.	0	.
chr17	49861604	49862105	.	0	.
chr17	91385617	91386118	.	0	.
chr10	81033523	81034024	.	0	.
chr7	109195937	109196438	.	0	.
chr16	90924547	90925048	.	0	.
chr5	131650261	131650762	.	0	.
chr10	61536101	61536602	.	0	.
chr7	130064499	130065000	.	0	.
chr1	177692387	177692888	.	0	.
chr8	25816715	25817216	.	0	.
chr10	75173708	75174209	.	0	.
chr9	40437773	40438274	.	0	.
chr10	89533419	89533920	.	0	.
chr4	116815310	116815811	.	0	.
chr7	27580271	27580772	.	0	.
chr2	104132002	104132503	.	0	.
chr12	111800452	111800953	.	0	.
chr5	121841955	121842456	.	0	.
chr10	4824335	4824836	.	0	.
chr3	152726952	152727453	.	0	.
chr15	84267676	84268177	.	0	.
chr4	57574574	57575075	.	0	.
chr5	30358668	30359169	.	0	.
chr2	145937479	145937980	.	0	.
chr9	62432832	62433333	.	0	.
chr2	25863219	25863720	.	0	.
chr6	17876536	17877037	.	0	.
chr2	158672653	158673154	.	0	.
chr12	12792145	12792646	.	0	.
chr2	22774102	22774603	.	0	.
chr17	24507786	24508287	.	0	.
chr8	94183146	94183647	.	0	.
chr9	57271749	57272250	.	0	.
chr9	43795944	43796445	.	0	.
chr13	58740197	58740698	.	0	.
chr14	25695988	25696489	.	0	.
chr1	151571136	151571637	.	0	.
chr11	101064948	101065449	.	0	.
chr16	35577534	35578035	.	0	.
chr2	26037208	26037709	.	0	.
chr11	46065250	46065751	.	0	.
chr5	140654315	140654816	.	0	.
chr5	121835464	121835965	.	0	.
chr11	116093949	116094450	.	0	.
chr13	41420286	41420787	.	0	.
chr14	54705657	54706158	.	0	.
chr16	13660689	13661190	.	0	.
chr17	88790930	88791431	.	0	.
chr18	60984816	60985317	.	0	.
chr2	132904953	132905454	.	0	.
chr3	88075111	88075612	.	0	.
chr3	88352744	88353245	.	0	.
chr8	110660066	110660567	.	0	.
chr12	79895936	79896437	.	0	.
chr10	62252059	62252560	.	0	.
chr12	16828452	16828953	.	0	.
chr7	100911190	100911691	.	0	.
chr7	34183495	34183996	.	0	.
chr16	24507842	24508343	.	0	.
chr11	100288799	100289300	.	0	.
chr11	57647431	57647932	.	0	.
chr9	107605067	107605568	.	0	.
chr2	166581847	166582348	.	0	.
chr12	104593512	104594013	.	0	.
chr18	69592369	69592870	.	0	.
chr11	50073850	50074351	.	0	.
chr15	79244614	79245115	.	0	.
chr5	117370528	117371029	.	0	.
chr6	115915669	115916170	.	0	.
chr3	98267648	98268149	.	0	.
chr7	80357056	80357557	.	0	.
chr3	85887273	85887774	.	0	.
chr8	57601878	57602379	.	0	.
chr2	163166376	163166877	.	0	.
chr14	34618746	34619247	.	0	.
chr8	86536318	86536819	.	0	.
chr17	32528634	32529135	.	0	.
chr12	102618068	102618569	.	0	.
chr10	61832069	61832570	.	0	.
chr7	19070256	19070757	.	0	.
chr9	58020115	58020616	.	0	.
chr4	11848713	11849214	.	0	.
chr5	36451843	36452344	.	0	.
chr3	95232729	95233230	.	0	.
chr12	99290235	99290736	.	0	.
chr8	40524284	40524785	.	0	.
chr12	29868681	29869182	.	0	.
chr17	35101090	35101591	.	0	.
chr5	114591294	114591795	.	0	.
chr4	57728707	57729208	.	0	.
chr17	31077624	31078125	.	0	.
chr2	157873128	157873629	.	0	.
chr7	109709007	109709508	.	0	.
chr7	126802052	126802553	.	0	.
chr10	20486705	20487206	.	0	.
chr5	43087917	43088418	.	0	.
chr5	64519712	64520213	.	0	.
chr7	125575449	125575950	.	0	.
chr17	74402662	74403163	.	0	.
chr5	124004698	124005199	.	0	.
chr4	104823717	104824218	.	0	.
chr15	74597479	74597980	.	0	.
chr16	30985279	30985780	.	0	.
chr15	85719061	85719562	.	0	.
chr7	126411101	126411602	.	0	.
chr11	95777800	95778301	.	0	.
chr13	20132689	20133190	.	0	.
chr11	95836992	95837493	.	0	.
chr1	92441309	92441810	.	0	.
chr16	36930639	36931140	.	0	.
chr4	125636584	125637085	.	0	.
chr2	158674102	158674603	.	0	.
chr2	160880348	160880849	.	0	.
chr14	33305603	33306104	.	0	.
chr13	56003869	56004370	.	0	.
chr19	3929517	3930018	.	0	.
chr15	83303655	83304156	.	0	.
chr1	156997407	156997908	.	0	.
chr9	63877589	63878090	.	0	.
chr4	129819726	129820227	.	0	.
chr12	12777492	12777993	.	0	.
chr9	21462657	21463158	.	0	.
chr1	119894943	119895444	.	0	.
chr7	45869067	45869568	.	0	.
chr5	134685009	134685510	.	0	.
chr1	187285730	187286231	.	0	.
chr14	60656668	60657169	.	0	.
chr8	71351093	71351594	.	0	.
chr18	61311728	61312229	.	0	.
chr11	116575332	116575833	.	0	.
chr11	59937525	59938026	.	0	.
chr4	128196385	128196886	.	0	.
chr1	156458388	156458889	.	0	.
chr12	102678878	102679379	.	0	.
chr17	56287777	56288278	.	0	.
chr4	102804613	102805114	.	0	.
chr14	21991266	21991767	.	0	.
chr15	84079980	84080481	.	0	.
chr5	35723792	35724293	.	0	.
chr1	74092186	74092687	.	0	.
chr12	91786269	91786770	.	0	.
chr17	56875120	56875621	.	0	.
chr15	56013927	56014428	.	0	.
chr3	126611618	126612119	.	0	.
chr8	47990867	47991368	.	0	.
chr15	76918774	76919275	.	0	.
chr17	69076162	69076663	.	0	.
chr15	98039595	98040096	.	0	.
chr9	58015999	58016500	.	0	.
chr10	77464416	77464917	.	0	.
chr13	97057849	97058350	.	0	.
chr3	79518977	79519478	.	0	.
chr4	134068015	134068516	.	0	.
chr11	119066817	119067318	.	0	.
chr17	5094642	5095143	.	0	.
chr2	38704311	38704812	.	0	.
chr19	41579223	41579724	.	0	.
chr7	79269281	79269782	.	0	.
chr2	91074887	91075388	.	0	.
chr4	64016703	64017204	.	0	.
chr13	37912522	37913023	.	0	.
chr10	80321256	80321757	.	0	.
chr15	27810320	27810821	.	0	.
chr1	39206848	39207349	.	0	.
chr10	59600448	59600949	.	0	.
chr12	108832224	108832725	.	0	.
chr2	157054259	157054760	.	0	.
chr7	99708213	99708714	.	0	.
chr12	111812928	111813429	.	0	.
chr5	124194648	124195149	.	0	.
chr7	5083290	5083791	.	0	.
chr7	120721494	120721995	.	0	.
chr4	141796252	141796753	.	0	.
chr14	32036407	32036908	.	0	.
chr2	158756762	158757263	.	0	.
chr16	91304063	91304564	.	0	.
chr6	97513652	97514153	.	0	.
chr12	83375400	83375901	.	0	.
chr16	92443716	92444217	.	0	.
chr1	133204107	133204608	.	0	.
chr5	137660055	137660556	.	0	.
chr7	143730568	143731069	.	0	.
chr11	4691158	4691659	.	0	.
chr12	80827383	80827884	.	0	.
chr15	59205441	59205942	.	0	.
chr1	72839750	72840251	.	0	.
chr1	181009730	181010231	.	0	.
chr1	74065948	74066449	.	0	.
chr11	59759059	59759560	.	0	.
chr7	125899814	125900315	.	0	.
chr18	82461928	82462429	.	0	.
chr10	125388834	125389335	.	0	.
chr17	27642447	27642948	.	0	.
chr7	79309329	79309830	.	0	.
chr2	181035830	181036331	.	0	.
chr8	26833194	26833695	.	0	.
chr8	120940212	120940713	.	0	.
chr1	89513574	89514075	.	0	.
chr1	118510925	118511426	.	0	.
chr10	70085152	70085653	.	0	.
chr10	86909305	86909806	.	0	.
chr11	31617167	31617668	.	0	.
chr11	50136442	50136943	.	0	.
chr11	99272802	99273303	.	0	.
chr11	100327213	100327714	.	0	.
chr12	104801738	104802239	.	0	.
chr13	38600810	38601311	.	0	.
chr14	57836828	57837329	.	0	.
chr14	64043912	64044413	.	0	.
chr15	82856565	82857066	.	0	.
chr17	34714571	34715072	.	0	.
chr17	63203570	63204071	.	0	.
chr17	78721544	78722045	.	0	.
chr18	5088636	5089137	.	0	.
chr2	25588200	25588701	.	0	.
chr2	130739317	130739818	.	0	.
chr2	166657781	166658282	.	0	.
chr4	63263394	63263895	.	0	.
chr4	133864549	133865050	.	0	.
chr4	154839284	154839785	.	0	.
chr5	112354523	112355024	.	0	.
chr6	88727445	88727946	.	0	.
chr6	113368393	113368894	.	0	.
chr7	109187536	109188037	.	0	.
chr7	112581612	112582113	.	0	.
chr8	92081892	92082393	.	0	.
chr8	122893409	122893910	.	0	.
chr8	124310474	124310975	.	0	.
chr9	18300353	18300854	.	0	.
chr9	40331971	40332472	.	0	.
chr9	110328976	110329477	.	0	.
chr9	120818607	120819108	.	0	.
chrX	151066059	151066560	.	0	.
chr2	14873603	14874104	.	0	.
chr3	125403830	125404331	.	0	.
chr14	75807802	75808303	.	0	.
chr17	47911037	47911538	.	0	.
chr12	99208592	99209093	.	0	.
chr7	139957866	139958367	.	0	.
chr5	121966828	121967329	.	0	.
chr15	97812072	97812573	.	0	.
chr12	108213645	108214146	.	0	.
chr19	29241527	29242028	.	0	.
chr2	167686429	167686930	.	0	.
chr4	155217446	155217947	.	0	.
chr7	144611548	144612049	.	0	.
chr14	60682651	60683152	.	0	.
chr6	135351641	135352142	.	0	.
chr13	12317171	12317672	.	0	.
chr14	118713275	118713776	.	0	.
chr5	52086961	52087462	.	0	.
chr16	34527845	34528346	.	0	.
chr4	135767150	135767651	.	0	.
chr1	39193895	39194396	.	0	.
chr4	98002206	98002707	.	0	.
chr10	127615814	127616315	.	0	.
chr4	141617197	141617698	.	0	.
chr7	49397292	49397793	.	0	.
chr7	141307483	141307984	.	0	.
chr5	113779513	113780014	.	0	.
chr11	120645385	120645886	.	0	.
chr3	128192372	128192873	.	0	.
chr1	190438705	190439206	.	0	.
chr11	60189329	60189830	.	0	.
chr11	88506636	88507137	.	0	.
chr6	115943395	115943896	.	0	.
chr2	93318843	93319344	.	0	.
chr13	34192765	34193266	.	0	.
chr8	17653739	17654240	.	0	.
chr14	33260059	33260560	.	0	.
chr3	89448535	89449036	.	0	.
chr19	46727912	46728413	.	0	.
chr17	25864292	25864793	.	0	.
chr4	151130670	151131171	.	0	.
chr7	25067852	25068353	.	0	.
chr10	59538728	59539229	.	0	.
chr12	52392500	52393001	.	0	.
chr9	40442737	40443238	.	0	.
chr7	30953975	30954476	.	0	.
chr11	60739540	60740041	.	0	.
chr3	131638164	131638665	.	0	.
chr4	135114378	135114879	.	0	.
chr15	81017191	81017692	.	0	.
chr17	84688791	84689292	.	0	.
chr18	75691078	75691579	.	0	.
chr17	26464120	26464621	.	0	.
chr8	11592207	11592708	.	0	.
chr16	20702423	20702924	.	0	.
chr16	31538402	31538903	.	0	.
chr18	70052873	70053374	.	0	.
chr11	97523735	97524236	.	0	.
chr19	46502614	46503115	.	0	.
chr5	113951509	113952010	.	0	.
chr13	111532331	111532832	.	0	.
chr17	47304445	47304946	.	0	.
chr11	50229425	50229926	.	0	.
chr6	72141128	72141629	.	0	.
chr17	66480196	66480697	.	0	.
chr4	118516630	118517131	.	0	.
chr8	105278928	105279429	.	0	.
chr18	82494934	82495435	.	0	.
chr4	137029160	137029661	.	0	.
chr9	21791812	21792313	.	0	.
chr11	50232928	50233429	.	0	.
chr14	8111576	8112077	.	0	.
chr10	75224067	75224568	.	0	.
chr7	19383741	19384242	.	0	.
chr10	80539442	80539943	.	0	.
chr4	116672672	116673173	.	0	.
chr16	91590852	91591353	.	0	.
chr9	58011029	58011530	.	0	.
chr5	36457614	36458115	.	0	.
chr8	87886675	87887176	.	0	.
chr7	35113722	35114223	.	0	.
chr8	123239537	123240038	.	0	.
chr4	107933050	107933551	.	0	.
chr12	106025206	106025707	.	0	.
chr2	119350818	119351319	.	0	.
chr8	117357992	117358493	.	0	.
chr11	88932179	88932680	.	0	.
chr17	47784129	47784630	.	0	.
chr3	96874638	96875139	.	0	.
chr11	6029737	6030238	.	0	.
chr11	118015993	118016494	.	0	.
chr19	11510957	11511458	.	0	.
chr2	25634081	25634582	.	0	.
chr5	141363891	141364392	.	0	.
chr4	123369820	123370321	.	0	.
chr6	6212727	6213228	.	0	.
chr6	95545148	95545649	.	0	.
chr17	83770872	83771373	.	0	.
chr8	4517043	4517544	.	0	.
chr7	101396877	101397378	.	0	.
chr17	70488903	70489404	.	0	.
chr15	66235838	66236339	.	0	.
chr2	145790812	145791313	.	0	.
chr4	120194036	120194537	.	0	.
chr6	48533611	48534112	.	0	.
chr12	110953326	110953827	.	0	.
chr17	31339741	31340242	.	0	.
chr7	112874029	112874530	.	0	.
chr2	166856327	166856828	.	0	.
chr5	149154252	149154753	.	0	.
chr18	12255931	12256432	.	0	.
chr2	165283588	165284089	.	0	.
chr10	120751867	120752368	.	0	.
chr7	125427662	125428163	.	0	.
chr16	78451287	78451788	.	0	.
chr17	26915300	26915801	.	0	.
chr2	25483156	25483657	.	0	.
chr17	56583516	56584017	.	0	.
chr18	37826206	37826707	.	0	.
chr14	30217968	30218469	.	0	.
chr15	16728325	16728826	.	0	.
chr2	26357560	26358061	.	0	.
chr7	98121677	98122178	.	0	.
chr2	153597444	153597945	.	0	.
chr8	26960864	26961365	.	0	.
chr15	81948388	81948889	.	0	.
chr6	31937007	31937508	.	0	.
chr4	136109424	136109925	.	0	.
chr1	192895977	192896478	.	0	.
chr14	76907907	76908408	.	0	.
chr11	32591747	32592248	.	0	.
chr15	98850469	98850970	.	0	.
chr3	87924946	87925447	.	0	.
chr11	51884052	51884553	.	0	.
chr17	29668134	29668635	.	0	.
chr19	4058545	4059046	.	0	.
chr4	135146597	135147098	.	0	.
chr7	112407458	112407959	.	0	.
chr13	41321650	41322151	.	0	.
chr2	165845493	165845994	.	0	.
chr3	84347377	84347878	.	0	.
chr14	54706860	54707361	.	0	.
chr8	22668861	22669362	.	0	.
chr15	89480631	89481132	.	0	.
chr18	13507496	13507997	.	0	.
chr4	155733148	155733649	.	0	.
chr12	16752500	16753001	.	0	.
chr9	118952768	118953269	.	0	.
chr15	58989595	58990096	.	0	.
chr2	32361454	32361955	.	0	.
chr13	99316404	99316905	.	0	.
chr8	13665823	13666324	.	0	.
chr9	40376049	40376550	.	0	.
chr6	87882789	87883290	.	0	.
chr1	174608526	174609027	.	0	.
chr10	6969052	6969553	.	0	.
chr11	23649707	23650208	.	0	.
chr12	29315769	29316270	.	0	.
chr13	69825440	69825941	.	0	.
chr13	92410458	92410959	.	0	.
chr13	108821189	108821690	.	0	.
chr14	58003171	58003672	.	0	.
chr15	82909657	82910158	.	0	.
chr16	38915988	38916489	.	0	.
chr17	56810137	56810638	.	0	.
chr18	57192480	57192981	.	0	.
chr2	25661101	25661602	.	0	.
chr2	142404250	142404751	.	0	.
chr2	162498192	162498693	.	0	.
chr3	86787511	86788012	.	0	.
chr4	107830867	107831368	.	0	.
chr4	141762081	141762582	.	0	.
chr5	99415698	99416199	.	0	.
chr5	150333188	150333689	.	0	.
chr7	66040346	66040847	.	0	.
chr7	125860378	125860879	.	0	.
chr8	3211336	3211837	.	0	.
chr8	25814854	25815355	.	0	.
chr8	78807152	78807653	.	0	.
chr9	44282974	44283475	.	0	.
chr9	62568979	62569480	.	0	.
chrX	36971081	36971582	.	0	.
chr1	133302443	133302944	.	0	.
chr4	10613316	10613817	.	0	.
chr12	102271332	102271833	.	0	.
chr13	72299613	72300114	.	0	.
chr11	24078950	24079451	.	0	.
chr9	31610033	31610534	.	0	.
chr9	45328258	45328759	.	0	.
chr2	120043971	120044472	.	0	.
chr10	69254350	69254851	.	0	.
chr8	120449032	120449533	.	0	.
chr8	121313996	121314497	.	0	.
chr2	145860369	145860870	.	0	.
chr10	79116353	79116854	.	0	.
chr4	130252702	130253203	.	0	.
chr10	76731525	76732026	.	0	.
chr19	57314675	57315176	.	0	.
chr8	87894216	87894717	.	0	.
chr11	59261071	59261572	.	0	.
chr19	47472689	47473190	.	0	.
chr6	119520569	119521070	.	0	.
chr14	54794607	54795108	.	0	.
chr13	37930033	37930534	.	0	.
chr15	76152333	76152834	.	0	.
chr4	114858379	114858880	.	0	.
chr2	118715402	118715903	.	0	.
chr19	58822166	58822667	.	0	.
chr3	138727420	138727921	.	0	.
chr12	113102353	113102854	.	0	.
chr10	44418924	44419425	.	0	.
chr11	55413313	55413814	.	0	.
chr15	83856258	83856759	.	0	.
chr2	128245421	128245922	.	0	.
chr7	112140613	112141114	.	0	.
chr1	40758539	40759040	.	0	.
chr10	74990419	74990920	.	0	.
chr19	46249081	46249582	.	0	.
chr1	85956503	85957004	.	0	.
chr4	129909082	129909583	.	0	.
chr8	71579463	71579964	.	0	.
chr2	113534467	113534968	.	0	.
chr4	70242810	70243311	.	0	.
chr11	100516127	100516628	.	0	.
chr9	65546259	65546760	.	0	.
chr15	64032644	64033145	.	0	.
chr9	27842508	27843009	.	0	.
chr13	53781743	53782244	.	0	.
chr8	16621247	16621748	.	0	.
chr5	24307358	24307859	.	0	.
chr8	124826683	124827184	.	0	.
chr14	75696069	75696570	.	0	.
chr1	168265461	168265962	.	0	.
chr12	86836580	86837081	.	0	.
chr2	32608413	32608914	.	0	.
chr6	100127340	100127841	.	0	.
chr15	64311729	64312230	.	0	.
chr7	139065369	139065870	.	0	.
chr5	142950206	142950707	.	0	.
chr10	60086811	60087312	.	0	.
chr7	78785890	78786391	.	0	.
chr2	91689393	91689894	.	0	.
chr8	111445660	111446161	.	0	.
chr11	77932001	77932502	.	0	.
chr19	59241950	59242451	.	0	.
chr11	113816913	113817414	.	0	.
chr2	52732083	52732584	.	0	.
chr11	102643814	102644315	.	0	.
chr2	25866564	25867065	.	0	.
chr11	119663867	119664368	.	0	.
chr6	38905972	38906473	.	0	.
chr2	145936893	145937394	.	0	.
chr4	149975140	149975641	.	0	.
chr2	118536500	118537001	.	0	.
chr9	62615670	62616171	.	0	.
chr15	97815166	97815667	.	0	.
chr16	76321489	76321990	.	0	.
chr7	28922000	28922501	.	0	.
chr17	6734771	6735272	.	0	.
chr11	43545860	43546361	.	0	.
chr16	76437997	76438498	.	0	.
chr11	59050998	59051499	.	0	.
chr7	143493427	143493928	.	0	.
chr14	77874658	77875159	.	0	.
chr6	31549052	31549553	.	0	.
chr12	8469842	8470343	.	0	.
chr11	78803528	78804029	.	0	.
chr7	38167143	38167644	.	0	.
chr15	82022703	82023204	.	0	.
chr14	65675977	65676478	.	0	.
chr3	100680189	100680690	.	0	.
chr7	139943887	139944388	.	0	.
chr9	52100376	52100877	.	0	.
chr16	26082758	26083259	.	0	.
chr8	117027566	117028067	.	0	.
chr3	142957768	142958269	.	0	.
chr7	81112942	81113443	.	0	.
chr4	129921239	129921740	.	0	.
chr8	105155271	105155772	.	0	.
chr14	64007731	64008232	.	0	.
chr17	28776243	28776744	.	0	.
chr2	156478057	156478558	.	0	.
chr7	141204437	141204938	.	0	.
chr7	142678569	142679070	.	0	.
chr8	70128331	70128832	.	0	.
chr8	124312545	124313046	.	0	.
chr10	128390325	128390826	.	0	.
chr11	70720998	70721499	.	0	.
chr14	121466409	121466910	.	0	.
chr2	93232928	93233429	.	0	.
chr2	117204535	117205036	.	0	.
chr2	152323235	152323736	.	0	.
chr7	126797324	126797825	.	0	.
chr7	141429882	141430383	.	0	.
chr8	68359877	68360378	.	0	.
chr8	125255032	125255533	.	0	.
chr9	44691939	44692440	.	0	.
chr15	73632187	73632688	.	0	.
chr17	23748836	23749337	.	0	.
chr17	69970107	69970608	.	0	.
chr18	6289737	6290238	.	0	.
chr19	46004595	46005096	.	0	.
chr4	156014988	156015489	.	0	.
chr9	90177706	90178207	.	0	.
chr9	103599972	103600473	.	0	.
chr2	172756482	172756983	.	0	.
chr5	25941826	25942327	.	0	.
chr1	36562912	36563413	.	0	.
chr11	114121240	114121741	.	0	.
chr4	136704567	136705068	.	0	.
chr1	135582669	135583170	.	0	.
chr1	190047085	190047586	.	0	.
chr5	24023254	24023755	.	0	.
chr8	94865246	94865747	.	0	.
chr10	80077328	80077829	.	0	.
chr11	59486312	59486813	.	0	.
chr2	28244687	28245188	.	0	.
chr18	74539096	74539597	.	0	.
chr2	152653094	152653595	.	0	.
chr10	80285508	80286009	.	0	.
chr12	72723853	72724354	.	0	.
chr4	140719939	140720440	.	0	.
chr11	101431297	101431798	.	0	.
chr12	32212133	32212634	.	0	.
chr17	34715078	34715579	.	0	.
chr4	45789369	45789870	.	0	.
chr11	114626983	114627484	.	0	.
chr13	41386563	41387064	.	0	.
chr7	25005743	25006244	.	0	.
chr2	5023990	5024491	.	0	.
chr3	88347295	88347796	.	0	.
chr13	70788981	70789482	.	0	.
chr7	79302469	79302970	.	0	.
chr8	71312754	71313255	.	0	.
chr15	84601141	84601642	.	0	.
chr11	107573212	107573713	.	0	.
chr17	50735320	50735821	.	0	.
chr8	57468579	57469080	.	0	.
chr9	45261486	45261987	.	0	.
chr11	50212963	50213464	.	0	.
chr12	69318370	69318871	.	0	.
chr7	112127163	112127664	.	0	.
chr7	130747868	130748369	.	0	.
chr7	142025886	142026387	.	0	.
chr2	4359064	4359565	.	0	.
chr3	30741231	30741732	.	0	.
chr9	51925170	51925671	.	0	.
chr14	58661314	58661815	.	0	.
chr11	120134903	120135404	.	0	.
chr17	28117868	28118369	.	0	.
chr10	7473476	7473977	.	0	.
chr18	82547403	82547904	.	0	.
chr3	89446931	89447432	.	0	.
chr11	53788131	53788632	.	0	.
chr2	156659973	156660474	.	0	.
chr13	95174140	95174641	.	0	.
chr8	125538443	125538944	.	0	.
chr4	133035415	133035916	.	0	.
chr14	24959966	24960467	.	0	.
chr6	86655714	86656215	.	0	.
chr17	87861548	87862049	.	0	.
chr4	4195775	4196276	.	0	.
chr11	46066025	46066526	.	0	.
chr6	134210541	134211042	.	0	.
chr9	98651634	98652135	.	0	.
chr16	33536345	33536846	.	0	.
chr19	3845790	3846291	.	0	.
chr2	167963808	167964309	.	0	.
chr9	63978611	63979112	.	0	.
chr1	93725698	93726199	.	0	.
chr6	84156509	84157010	.	0	.
chr17	65647243	65647744	.	0	.
chr3	95696378	95696879	.	0	.
chr9	108128259	108128760	.	0	.
chr2	93462223	93462724	.	0	.
chr1	151079839	151080340	.	0	.
chr1	155830826	155831327	.	0	.
chr10	13813493	13813994	.	0	.
chr10	59419591	59420092	.	0	.
chr10	84885662	84886163	.	0	.
chr10	93595788	93596289	.	0	.
chr10	127477288	127477789	.	0	.
chr12	77841924	77842425	.	0	.
chr13	60553245	60553746	.	0	.
chr13	95187304	95187805	.	0	.
chr14	47499949	47500450	.	0	.
chr14	48590418	48590919	.	0	.
chr15	74851378	74851879	.	0	.
chr16	20474182	20474683	.	0	.
chr16	45329693	45330194	.	0	.
chr2	28904607	28905108	.	0	.
chr2	91504628	91505129	.	0	.
chr2	153573880	153574381	.	0	.
chr3	75883442	75883943	.	0	.
chr4	104220013	104220514	.	0	.
chr4	134712575	134713076	.	0	.
chr4	143366386	143366887	.	0	.
chr5	66889400	66889901	.	0	.
chr5	121251742	121252243	.	0	.
chr6	17280959	17281460	.	0	.
chr6	31216614	31217115	.	0	.
chr6	137566658	137567159	.	0	.
chr7	36543181	36543682	.	0	.
chr7	55871538	55872039	.	0	.
chr9	51930787	51931288	.	0	.
chr9	72608802	72609303	.	0	.
chr9	73223052	73223553	.	0	.
chr9	87077826	87078327	.	0	.
chr15	86098710	86099211	.	0	.
chr16	33560208	33560709	.	0	.
chr13	119709438	119709939	.	0	.
chr17	30205937	30206438	.	0	.
chr2	153548263	153548764	.	0	.
chr9	107550566	107551067	.	0	.
chr7	45367521	45368022	.	0	.
chr6	124683431	124683932	.	0	.
chr15	85908666	85909167	.	0	.
chr13	73536527	73537028	.	0	.
chr9	75004111	75004612	.	0	.
chr1	195092127	195092628	.	0	.
chr6	90565304	90565805	.	0	.
chr18	5027297	5027798	.	0	.
chr5	114551837	114552338	.	0	.
chr8	120105034	120105535	.	0	.
chr4	133614267	133614768	.	0	.
chr9	22327797	22328298	.	0	.
chr9	106268371	106268872	.	0	.
chr11	121517977	121518478	.	0	.
chr12	26477212	26477713	.	0	.
chr13	32924908	32925409	.	0	.
chr9	15188924	15189425	.	0	.
chr6	23024905	23025406	.	0	.
chr6	85363658	85364159	.	0	.
chr17	87379756	87380257	.	0	.
chr8	122464912	122465413	.	0	.
chr17	24606448	24606949	.	0	.
chr6	17171424	17171925	.	0	.
chr10	17556322	17556823	.	0	.
chr19	41666023	41666524	.	0	.
chr17	69105213	69105714	.	0	.
chr2	166448155	166448656	.	0	.
chr1	78367968	78368469	.	0	.
chr10	120751320	120751821	.	0	.
chr12	55443087	55443588	.	0	.
chr17	56669709	56670210	.	0	.
chr9	58028824	58029325	.	0	.
chr11	50184005	50184506	.	0	.
chr4	57751479	57751980	.	0	.
chr4	108338190	108338691	.	0	.
chr8	106050901	106051402	.	0	.
chr16	10600124	10600625	.	0	.
chr14	21021784	21022285	.	0	.
chr1	120921422	120921923	.	0	.
chr18	80274624	80275125	.	0	.
chr2	38707778	38708279	.	0	.
chr6	22035399	22035900	.	0	.
chr15	85599540	85600041	.	0	.
chr3	75954108	75954609	.	0	.
chr17	34927564	34928065	.	0	.
chr1	174771758	174772259	.	0	.
chr6	83791498	83791999	.	0	.
chr11	100168937	100169438	.	0	.
chr1	87574797	87575298	.	0	.
chr7	79285369	79285870	.	0	.
chr11	97048172	97048673	.	0	.
chr4	133056075	133056576	.	0	.
chr12	83424645	83425146	.	0	.
chr13	33144432	33144933	.	0	.
chr2	103346695	103347196	.	0	.
chr14	7997094	7997595	.	0	.
chr12	25165595	25166096	.	0	.
chr16	76365096	76365597	.	0	.
chr19	10692006	10692507	.	0	.
chr1	91494353	91494854	.	0	.
chr5	112378776	112379277	.	0	.
chr9	58019013	58019514	.	0	.
chr7	16919667	16920168	.	0	.
chr14	70179709	70180210	.	0	.
chr9	54534183	54534684	.	0	.
chr14	77460595	77461096	.	0	.
chr11	5985630	5986131	.	0	.
chr11	111843580	111844081	.	0	.
chr15	76626427	76626928	.	0	.
chr1	75311969	75312470	.	0	.
chr3	82990246	82990747	.	0	.
chr1	138299627	138300128	.	0	.
chr1	87258400	87258901	.	0	.
chr1	66871474	66871975	.	0	.
chr11	96124408	96124909	.	0	.
chr13	51400353	51400854	.	0	.
chr5	121854630	121855131	.	0	.
chr1	132468903	132469404	.	0	.
chr9	46067568	46068069	.	0	.
chr11	119572804	119573305	.	0	.
chr15	98849910	98850411	.	0	.
chr7	49600003	49600504	.	0	.
chr1	119404659	119405160	.	0	.
chr1	62725065	62725566	.	0	.
chr10	117203467	117203968	.	0	.
chr13	102693277	102693778	.	0	.
chr9	63927553	63928054	.	0	.
chr6	30363800	30364301	.	0	.
chr17	56567419	56567920	.	0	.
chr6	86226882	86227383	.	0	.
chr12	5213718	5214219	.	0	.
chr15	77760974	77761475	.	0	.
chr18	60711980	60712481	.	0	.
chr15	99498761	99499262	.	0	.
chr8	70087739	70088240	.	0	.
chr7	137068688	137069189	.	0	.
chr3	108870555	108871056	.	0	.
chr4	141530954	141531455	.	0	.
chr5	117370025	117370526	.	0	.
chr4	152094491	152094992	.	0	.
chr15	77014929	77015430	.	0	.
chr12	111933262	111933763	.	0	.
chr1	157060694	157061195	.	0	.
chrX	11748260	11748761	.	0	.
chr7	25360278	25360779	.	0	.
chr5	140726884	140727385	.	0	.
chr11	32889245	32889746	.	0	.
chr18	36020423	36020924	.	0	.
chr16	10927302	10927803	.	0	.
chr1	5916253	5916754	.	0	.
chr11	75876540	75877041	.	0	.
chr11	97067806	97068307	.	0	.
chr4	120716362	120716863	.	0	.
chr7	112142940	112143441	.	0	.
chr7	126880293	126880794	.	0	.
chr9	106205771	106206272	.	0	.
chr13	21739952	21740453	.	0	.
chr16	17656277	17656778	.	0	.
chr3	109550103	109550604	.	0	.
chr4	53238774	53239275	.	0	.
chr7	65737204	65737705	.	0	.
chr1	151660243	151660744	.	0	.
chr13	57626328	57626829	.	0	.
chr15	101802820	101803321	.	0	.
chr16	42781690	42782191	.	0	.
chr17	23553361	23553862	.	0	.
chr17	71247734	71248235	.	0	.
chr19	3714339	3714840	.	0	.
chr2	30337213	30337714	.	0	.
chr2	72126463	72126964	.	0	.
chr4	149732343	149732844	.	0	.
chr6	146195879	146196380	.	0	.
chr7	121098670	121099171	.	0	.
chr10	108143944	108144445	.	0	.
chr19	57534128	57534629	.	0	.
chr5	123479448	123479949	.	0	.
chr8	87888442	87888943	.	0	.
chr10	62252731	62253232	.	0	.
chr15	95848431	95848932	.	0	.
chr18	61121180	61121681	.	0	.
chr2	28162353	28162854	.	0	.
chr1	132769233	132769734	.	0	.
chr1	172586126	172586627	.	0	.
chr16	17085669	17086170	.	0	.
chr17	26187970	26188471	.	0	.
chr9	31365019	31365520	.	0	.
chr12	109425973	109426474	.	0	.
chr9	58026043	58026544	.	0	.
chr16	33781891	33782392	.	0	.
chr18	36399592	36400093	.	0	.
chr19	41346807	41347308	.	0	.
chr2	33451448	33451949	.	0	.
chr2	148003466	148003967	.	0	.
chr3	27861587	27862088	.	0	.
chr7	4641948	4642449	.	0	.
chr1	35687232	35687733	.	0	.
chr13	95782210	95782711	.	0	.
chr19	10281121	10281622	.	0	.
chr2	103836877	103837378	.	0	.
chr4	148869516	148870017	.	0	.
chr6	91662383	91662884	.	0	.
chr10	39245105	39245606	.	0	.
[truncated: 4,987 more rows]

## Sheet: PTM.DAR
chr1	136094724	136095225	.	0	.
chr17	45260442	45260943	.	0	.
chr7	73243583	73244084	.	0	.
chr18	14331572	14332073	.	0	.
chr10	127721791	127722292	.	0	.
chr16	30184759	30185260	.	0	.
chr4	47178069	47178570	.	0	.
chr11	117312506	117313007	.	0	.
chr14	28522419	28522920	.	0	.
chr2	27088017	27088518	.	0	.
chr6	127565904	127566405	.	0	.
chr8	11414163	11414664	.	0	.
chr1	73824327	73824828	.	0	.
chr4	47178576	47179077	.	0	.
chr8	11405618	11406119	.	0	.
chr2	131402057	131402558	.	0	.
chr17	8524817	8525318	.	0	.
chr17	31936967	31937468	.	0	.
chr18	75502728	75503229	.	0	.
chr1	192525798	192526299	.	0	.
chr10	83168628	83169129	.	0	.
chr11	59960516	59961017	.	0	.
chr8	115414113	115414614	.	0	.
chr17	47332087	47332588	.	0	.
chr7	142430055	142430556	.	0	.
chr2	31948333	31948834	.	0	.
chr15	84654205	84654706	.	0	.
chr6	108709464	108709965	.	0	.
chr16	94117236	94117737	.	0	.
chr16	29761845	29762346	.	0	.
chr11	120665386	120665887	.	0	.
chr15	51730693	51731194	.	0	.
chr6	39528572	39529073	.	0	.
chr6	136875548	136876049	.	0	.
chr17	31384882	31385383	.	0	.
chr5	112346175	112346676	.	0	.
chr8	10928496	10928997	.	0	.
chr8	12956267	12956768	.	0	.
chr2	27802447	27802948	.	0	.
chr1	170655488	170655989	.	0	.
chr3	51708867	51709368	.	0	.
chr11	95263723	95264224	.	0	.
chr5	118321766	118322267	.	0	.
chr11	19963561	19964062	.	0	.
chr7	139706587	139707088	.	0	.
chr2	31901492	31901993	.	0	.
chr2	49572321	49572822	.	0	.
chr11	101881565	101882066	.	0	.
chr11	6481654	6482155	.	0	.
chr5	149320581	149321082	.	0	.
chr11	108023063	108023564	.	0	.
chr10	70159638	70160139	.	0	.
chr8	71127090	71127591	.	0	.
chr2	165074436	165074937	.	0	.
chr11	97511761	97512262	.	0	.
chr8	120161685	120162186	.	0	.
chr11	117292382	117292883	.	0	.
chr17	46287584	46288085	.	0	.
chr13	60071513	60072014	.	0	.
chr3	37896928	37897429	.	0	.
chr9	98642001	98642502	.	0	.
chr7	112228910	112229411	.	0	.
chr16	31428824	31429325	.	0	.
chr10	86126457	86126958	.	0	.
chr17	84585038	84585539	.	0	.
chr4	150725460	150725961	.	0	.
chr2	172888049	172888550	.	0	.
chr10	77192701	77193202	.	0	.
chr5	122439333	122439834	.	0	.
chr16	35603688	35604189	.	0	.
chr6	114860966	114861467	.	0	.
chr1	118988305	118988806	.	0	.
chr11	83447393	83447894	.	0	.
chr8	13512498	13512999	.	0	.
chr9	116099080	116099581	.	0	.
chr10	61357779	61358280	.	0	.
chr16	92883686	92884187	.	0	.
chr6	90471058	90471559	.	0	.
chr8	117433880	117434381	.	0	.
chr14	62259060	62259561	.	0	.
chr18	32813920	32814421	.	0	.
chr12	79942608	79943109	.	0	.
chr15	84697474	84697975	.	0	.
chr7	34746199	34746700	.	0	.
chr9	40675615	40676116	.	0	.
chr9	65244295	65244796	.	0	.
chr4	137305842	137306343	.	0	.
chr6	135369579	135370080	.	0	.
chr2	169777906	169778407	.	0	.
chr2	92645142	92645643	.	0	.
chr2	139792497	139792998	.	0	.
chr15	78832168	78832669	.	0	.
chr13	101597679	101598180	.	0	.
chr2	174022648	174023149	.	0	.
chr5	123326617	123327118	.	0	.
chr3	90623706	90624207	.	0	.
chr4	123228210	123228711	.	0	.
chr12	25363782	25364283	.	0	.
chr2	172867175	172867676	.	0	.
chr9	42693009	42693510	.	0	.
chr2	52623441	52623942	.	0	.
chr6	86086758	86087259	.	0	.
chr1	72599004	72599505	.	0	.
chr5	138769042	138769543	.	0	.
chr10	77658562	77659063	.	0	.
chr14	32950858	32951359	.	0	.
chr8	12905638	12906139	.	0	.
chr13	45576107	45576608	.	0	.
chr5	134597652	134598153	.	0	.
chr11	54833645	54834146	.	0	.
chr18	65101500	65102001	.	0	.
chr10	81411026	81411527	.	0	.
chr11	51637848	51638349	.	0	.
chr9	32320123	32320624	.	0	.
chr2	164889085	164889586	.	0	.
chr10	81411610	81412111	.	0	.
chr12	105517052	105517553	.	0	.
chr15	31258273	31258774	.	0	.
chr11	109344063	109344564	.	0	.
chr9	107521166	107521667	.	0	.
chr4	101450356	101450857	.	0	.
chr9	56860328	56860829	.	0	.
chr16	94721607	94722108	.	0	.
chr8	11411728	11412229	.	0	.
chr11	108299813	108300314	.	0	.
chr11	118165535	118166036	.	0	.
chr11	59956722	59957223	.	0	.
chr9	37054668	37055169	.	0	.
chr19	22901779	22902280	.	0	.
chr4	120024045	120024546	.	0	.
chr14	34565671	34566172	.	0	.
chr12	4028470	4028971	.	0	.
chr8	119440019	119440520	.	0	.
chr5	66559612	66560113	.	0	.
chr1	52166632	52167133	.	0	.
chr4	128839751	128840252	.	0	.
chr1	192527269	192527770	.	0	.
chr8	47851816	47852317	.	0	.
chr11	74992333	74992834	.	0	.
chr5	111661996	111662497	.	0	.
chr1	72593572	72594073	.	0	.
chr2	163596023	163596524	.	0	.
chr16	93932404	93932905	.	0	.
chr4	123247088	123247589	.	0	.
chr11	59885197	59885698	.	0	.
chr16	18176043	18176544	.	0	.
chr8	94171346	94171847	.	0	.
chr7	70410292	70410793	.	0	.
chr9	14626668	14627169	.	0	.
chr2	118749419	118749920	.	0	.
chr9	122183042	122183543	.	0	.
chr2	159057482	159057983	.	0	.
chr11	94958005	94958506	.	0	.
chr4	134078599	134079100	.	0	.
chr2	30716490	30716991	.	0	.
chr12	25189128	25189629	.	0	.
chr3	37846577	37847078	.	0	.
chr8	88302265	88302766	.	0	.
chr10	42934707	42935208	.	0	.
chr15	37432533	37433034	.	0	.
chr11	79002444	79002945	.	0	.
chr2	32683054	32683555	.	0	.
chr4	149856329	149856830	.	0	.
chr4	108633589	108634090	.	0	.
chr10	66994453	66994954	.	0	.
chr4	46684074	46684575	.	0	.
chr17	65679881	65680382	.	0	.
chr2	27079000	27079501	.	0	.
chr9	108106842	108107343	.	0	.
chr1	155222175	155222676	.	0	.
chr4	11848138	11848639	.	0	.
chr8	125624354	125624855	.	0	.
chr1	135554805	135555306	.	0	.
chr2	27232407	27232908	.	0	.
chr17	25081002	25081503	.	0	.
chr3	84438139	84438640	.	0	.
chr3	135580332	135580833	.	0	.
chr4	141964491	141964992	.	0	.
chr8	111693179	111693680	.	0	.
chr15	99332834	99333335	.	0	.
chr12	80123408	80123909	.	0	.
chr18	11976514	11977015	.	0	.
chr11	33963025	33963526	.	0	.
chr18	61482294	61482795	.	0	.
chr7	79647203	79647704	.	0	.
chr10	37194113	37194614	.	0	.
chr12	113028013	113028514	.	0	.
chr13	43191854	43192355	.	0	.
chr9	14548328	14548829	.	0	.
chr5	136159998	136160499	.	0	.
chr13	28757982	28758483	.	0	.
chr15	78480827	78481328	.	0	.
chr2	27956660	27957161	.	0	.
chr6	7966212	7966713	.	0	.
chr5	36252689	36253190	.	0	.
chr5	113611144	113611645	.	0	.
chr8	125133594	125134095	.	0	.
chr6	137487324	137487825	.	0	.
chr17	25683962	25684463	.	0	.
chr4	128265250	128265751	.	0	.
chr8	124569731	124570232	.	0	.
chr6	34313295	34313796	.	0	.
chr8	115250192	115250693	.	0	.
chr5	74874652	74875153	.	0	.
chr5	52130420	52130921	.	0	.
chr11	105936212	105936713	.	0	.
chr15	74224532	74225033	.	0	.
chr15	34820612	34821113	.	0	.
chr10	80165666	80166167	.	0	.
chrX	159697075	159697576	.	0	.
chr15	62202633	62203134	.	0	.
chr4	47143808	47144309	.	0	.
chr16	30199746	30200247	.	0	.
chr17	28256943	28257444	.	0	.
chr1	165717787	165718288	.	0	.
chr11	94521286	94521787	.	0	.
chr2	92477821	92478322	.	0	.
chr11	101162679	101163180	.	0	.
chr11	28692721	28693222	.	0	.
chr19	42639154	42639655	.	0	.
chr15	34829336	34829837	.	0	.
chr11	116075739	116076240	.	0	.
chr15	85776672	85777173	.	0	.
chr1	40097536	40098037	.	0	.
chr6	94806732	94807233	.	0	.
chr4	134579199	134579700	.	0	.
chr5	134539852	134540353	.	0	.
chr11	119585394	119585895	.	0	.
chr2	152933008	152933509	.	0	.
chr3	37758663	37759164	.	0	.
chr9	49980778	49981279	.	0	.
chr10	86123208	86123709	.	0	.
chr9	62477084	62477585	.	0	.
chr5	122247513	122248014	.	0	.
chr5	111675479	111675980	.	0	.
chr6	88759728	88760229	.	0	.
chr7	96768687	96769188	.	0	.
chr3	105019753	105020254	.	0	.
chr13	94135170	94135671	.	0	.
chr2	152111277	152111778	.	0	.
chr15	84769611	84770112	.	0	.
chr4	135080321	135080822	.	0	.
chr16	85680309	85680810	.	0	.
chr15	12084104	12084605	.	0	.
chr7	132788742	132789243	.	0	.
chr6	108410700	108411201	.	0	.
chr8	10946032	10946533	.	0	.
chr13	51480433	51480934	.	0	.
chr5	135672943	135673444	.	0	.
chr1	73991219	73991720	.	0	.
chr4	8954326	8954827	.	0	.
chr1	87786183	87786684	.	0	.
chr11	4620556	4621057	.	0	.
chr5	52509306	52509807	.	0	.
chr6	92036241	92036742	.	0	.
chr17	88553033	88553534	.	0	.
chr11	95369912	95370413	.	0	.
chr5	134568843	134569344	.	0	.
chr13	111397491	111397992	.	0	.
chr19	44519139	44519640	.	0	.
chr11	63125688	63126189	.	0	.
chr3	100395139	100395640	.	0	.
chr7	25707534	25708035	.	0	.
chr5	124960420	124960921	.	0	.
chr3	89633919	89634420	.	0	.
chr10	81253020	81253521	.	0	.
chr2	118752181	118752682	.	0	.
chr10	99524530	99525031	.	0	.
chr17	25510321	25510822	.	0	.
chr10	108368356	108368857	.	0	.
chr2	128324480	128324981	.	0	.
chr11	54904220	54904721	.	0	.
chr3	121604784	121605285	.	0	.
chr7	132748076	132748577	.	0	.
chr6	89282540	89283041	.	0	.
chr11	61713095	61713596	.	0	.
chr14	55564263	55564764	.	0	.
chr6	99447117	99447618	.	0	.
chr11	88425487	88425988	.	0	.
chr6	136818685	136819186	.	0	.
chr10	83217062	83217563	.	0	.
chr9	37626171	37626672	.	0	.
chr7	83564779	83565280	.	0	.
chr1	165592334	165592835	.	0	.
chr11	116296346	116296847	.	0	.
chr18	75654698	75655199	.	0	.
chr11	51431924	51432425	.	0	.
chr19	3923596	3924097	.	0	.
chr12	85185805	85186306	.	0	.
chr10	8818041	8818542	.	0	.
chr8	102978130	102978631	.	0	.
chr15	78836243	78836744	.	0	.
chr18	12109632	12110133	.	0	.
chr4	130837509	130838010	.	0	.
chr18	75279103	75279604	.	0	.
chr16	36531078	36531579	.	0	.
chr16	94724764	94725265	.	0	.
chr7	25624756	25625257	.	0	.
chr8	10910850	10911351	.	0	.
chr8	36099543	36100044	.	0	.
chr16	34441012	34441513	.	0	.
chr7	64839831	64840332	.	0	.
chr7	64032928	64033429	.	0	.
chr11	94525977	94526478	.	0	.
chr5	123498257	123498758	.	0	.
chr17	11975180	11975681	.	0	.
chr1	132128127	132128628	.	0	.
chr12	16618782	16619283	.	0	.
chr19	6322147	6322648	.	0	.
chr2	27088601	27089102	.	0	.
chr16	95642867	95643368	.	0	.
chr11	59961138	59961639	.	0	.
chr7	125561247	125561748	.	0	.
chr2	158243459	158243960	.	0	.
chr5	122439999	122440500	.	0	.
chr17	73023294	73023795	.	0	.
chr18	43359900	43360401	.	0	.
chr1	193330116	193330617	.	0	.
chr13	31179585	31180086	.	0	.
chr11	100387899	100388400	.	0	.
chr18	61056953	61057454	.	0	.
chr10	4473469	4473970	.	0	.
chr1	180286247	180286748	.	0	.
chr12	12995174	12995675	.	0	.
chr12	85540909	85541410	.	0	.
chr6	30682413	30682914	.	0	.
chr4	138807075	138807576	.	0	.
chr8	79356097	79356598	.	0	.
chr11	103648019	103648520	.	0	.
chr8	57560998	57561499	.	0	.
chr7	80888567	80889068	.	0	.
chr6	142538531	142539032	.	0	.
chr8	110719236	110719737	.	0	.
chr16	90679996	90680497	.	0	.
chr17	88174221	88174722	.	0	.
chr5	113420423	113420924	.	0	.
chr14	28992464	28992965	.	0	.
chr5	137102818	137103319	.	0	.
chr5	63951359	63951860	.	0	.
chr7	66253921	66254422	.	0	.
chr16	34966607	34967108	.	0	.
chr12	77039537	77040038	.	0	.
chr5	100643693	100644194	.	0	.
chr12	100966188	100966689	.	0	.
chr11	109485558	109486059	.	0	.
chr10	98618983	98619484	.	0	.
chr5	125040132	125040633	.	0	.
chr1	171113842	171114343	.	0	.
chr8	46892472	46892973	.	0	.
chr17	47059708	47060209	.	0	.
chr19	56996979	56997480	.	0	.
chr2	166485656	166486157	.	0	.
chr2	172888569	172889070	.	0	.
chr1	190972600	190973101	.	0	.
chr10	127081379	127081880	.	0	.
chr17	31456644	31457145	.	0	.
chr7	101457747	101458248	.	0	.
chr10	67038872	67039373	.	0	.
chr1	134098397	134098898	.	0	.
chr4	47497750	47498251	.	0	.
chr18	60669410	60669911	.	0	.
chr2	109559481	109559982	.	0	.
chr11	79054649	79055150	.	0	.
chr14	25365176	25365677	.	0	.
chr11	3573042	3573543	.	0	.
chr10	81259378	81259879	.	0	.
chr17	65666382	65666883	.	0	.
chr6	5093304	5093805	.	0	.
chr2	158248250	158248751	.	0	.
chr4	138569799	138570300	.	0	.
chr17	8487737	8488238	.	0	.
chr10	120707783	120708284	.	0	.
chr8	70747041	70747542	.	0	.
chr10	61866101	61866602	.	0	.
chr8	25543420	25543921	.	0	.
chr4	127235377	127235878	.	0	.
chr2	92616992	92617493	.	0	.
chr6	92021493	92021994	.	0	.
chr7	83565898	83566399	.	0	.
chr4	128264714	128265215	.	0	.
chr3	108166362	108166863	.	0	.
chr5	121598790	121599291	.	0	.
chr17	31557407	31557908	.	0	.
chr5	114897471	114897972	.	0	.
chr15	77763660	77764161	.	0	.
chr12	100980641	100981142	.	0	.
chr11	54335996	54336497	.	0	.
chr17	46443557	46444058	.	0	.
chr2	157040213	157040714	.	0	.
chr18	25630223	25630724	.	0	.
chr9	111056982	111057483	.	0	.
chr1	134704551	134705052	.	0	.
chr2	31537101	31537602	.	0	.
chr5	112896164	112896665	.	0	.
chr3	31061544	31062045	.	0	.
chr16	34372180	34372681	.	0	.
chr4	118642816	118643317	.	0	.
chr17	25443511	25444012	.	0	.
chr8	122793595	122794096	.	0	.
chr5	73700983	73701484	.	0	.
chr6	87186934	87187435	.	0	.
chr4	47124225	47124726	.	0	.
chr15	77773215	77773716	.	0	.
chr16	29893776	29894277	.	0	.
chr7	97781530	97782031	.	0	.
chr19	41697412	41697913	.	0	.
chr15	83226812	83227313	.	0	.
chr4	140030383	140030884	.	0	.
chr1	183072309	183072810	.	0	.
chr11	101867795	101868296	.	0	.
chr3	30546825	30547326	.	0	.
chr2	172380443	172380944	.	0	.
chr8	18728794	18729295	.	0	.
chr12	76553892	76554393	.	0	.
chr1	90652027	90652528	.	0	.
chr7	73369932	73370433	.	0	.
chr5	122146016	122146517	.	0	.
chr1	82560268	82560769	.	0	.
chr2	26525608	26526109	.	0	.
chr7	78826940	78827441	.	0	.
chr4	155780866	155781367	.	0	.
chr3	138722066	138722567	.	0	.
chr18	38928753	38929254	.	0	.
chr11	98707960	98708461	.	0	.
chr10	42027284	42027785	.	0	.
chr2	139677211	139677712	.	0	.
chr15	78481445	78481946	.	0	.
chr4	107603070	107603571	.	0	.
chr10	77441266	77441767	.	0	.
chr12	117223990	117224491	.	0	.
chr11	31480672	31481173	.	0	.
chr14	70023166	70023667	.	0	.
chr18	61682673	61683174	.	0	.
chr2	180890292	180890793	.	0	.
chr4	134041668	134042169	.	0	.
chr6	100929668	100930169	.	0	.
chr10	3810784	3811285	.	0	.
chr9	53402261	53402762	.	0	.
chr1	189165042	189165543	.	0	.
chr2	73592986	73593487	.	0	.
chr11	89029107	89029608	.	0	.
chr13	98654129	98654630	.	0	.
chr8	11155856	11156357	.	0	.
chr17	86313448	86313949	.	0	.
chr11	103666303	103666804	.	0	.
chr11	120903355	120903856	.	0	.
chr5	36669396	36669897	.	0	.
chr5	113880601	113881102	.	0	.
chr4	56878901	56879402	.	0	.
chr5	137093740	137094241	.	0	.
chr4	123226069	123226570	.	0	.
chr17	12066573	12067074	.	0	.
chr7	44525052	44525553	.	0	.
chr3	37838829	37839330	.	0	.
chr15	79432880	79433381	.	0	.
chr11	117308396	117308897	.	0	.
chr15	84698002	84698503	.	0	.
chr11	103285915	103286416	.	0	.
chr2	169826250	169826751	.	0	.
chr2	157347808	157348309	.	0	.
chr10	76635964	76636465	.	0	.
chr7	36709188	36709689	.	0	.
chr5	115186683	115187184	.	0	.
chr6	120951224	120951725	.	0	.
chr7	101458329	101458830	.	0	.
chr11	114844038	114844539	.	0	.
chr4	137864768	137865269	.	0	.
chr6	88836364	88836865	.	0	.
chr5	134874435	134874936	.	0	.
chr4	133250858	133251359	.	0	.
chr3	87785664	87786165	.	0	.
chr10	111600576	111601077	.	0	.
chr10	62044446	62044947	.	0	.
chr6	89659973	89660474	.	0	.
chr7	25390378	25390879	.	0	.
chr15	56764845	56765346	.	0	.
chr17	27967884	27968385	.	0	.
chr17	27048392	27048893	.	0	.
chr11	72396449	72396950	.	0	.
chr12	109432424	109432925	.	0	.
chr2	168384459	168384960	.	0	.
chr19	7142402	7142903	.	0	.
chr15	99503229	99503730	.	0	.
chr17	86505247	86505748	.	0	.
chr3	37758040	37758541	.	0	.
chr7	55877734	55878235	.	0	.
chr4	135079793	135080294	.	0	.
chr18	61041261	61041762	.	0	.
chr10	8287206	8287707	.	0	.
chr19	53507381	53507882	.	0	.
chr10	39646498	39646999	.	0	.
chr14	32951459	32951960	.	0	.
chr16	30019989	30020490	.	0	.
chr12	102240788	102241289	.	0	.
chr11	117890917	117891418	.	0	.
chr10	42089591	42090092	.	0	.
chr11	85845895	85846396	.	0	.
chr10	39534236	39534737	.	0	.
chr11	117296257	117296758	.	0	.
chr12	80885303	80885804	.	0	.
chr7	135932834	135933335	.	0	.
chr4	137920393	137920894	.	0	.
chr4	101439628	101440129	.	0	.
chr19	40490611	40491112	.	0	.
chr9	14547423	14547924	.	0	.
chr15	82280359	82280860	.	0	.
chr1	80854270	80854771	.	0	.
chr10	83181783	83182284	.	0	.
chr7	112378462	112378963	.	0	.
chr5	113611784	113612285	.	0	.
chr1	87700064	87700565	.	0	.
chr4	128661035	128661536	.	0	.
chr1	56089412	56089913	.	0	.
chr12	79661312	79661813	.	0	.
chr5	7960175	7960676	.	0	.
chr9	110877843	110878344	.	0	.
chr4	136119999	136120500	.	0	.
chr8	34165186	34165687	.	0	.
chr2	31305246	31305747	.	0	.
chr16	92394865	92395366	.	0	.
chr4	63560672	63561173	.	0	.
chr11	79081258	79081759	.	0	.
chr2	152723858	152724359	.	0	.
chr13	56634129	56634630	.	0	.
chr8	122076041	122076542	.	0	.
chr17	31836675	31837176	.	0	.
chr2	160433120	160433621	.	0	.
chr17	35220554	35221055	.	0	.
chr4	63580011	63580512	.	0	.
chrX	11739510	11740011	.	0	.
chr2	74926388	74926889	.	0	.
chr1	154102951	154103452	.	0	.
chr17	83288017	83288518	.	0	.
chr10	69104460	69104961	.	0	.
chr15	76050583	76051084	.	0	.
chr4	145239286	145239787	.	0	.
chr4	129011749	129012250	.	0	.
chr11	52365072	52365573	.	0	.
chr10	62404808	62405309	.	0	.
chr5	125184714	125185215	.	0	.
chr5	114357137	114357638	.	0	.
chr15	97350519	97351020	.	0	.
chr19	7089825	7090326	.	0	.
chr4	100401930	100402431	.	0	.
chr18	12566784	12567285	.	0	.
chr5	112928360	112928861	.	0	.
chr17	83197390	83197891	.	0	.
chr5	30460218	30460719	.	0	.
chr10	86933155	86933656	.	0	.
chr12	69751795	69752296	.	0	.
chr12	100944993	100945494	.	0	.
chr5	113660945	113661446	.	0	.
chr7	130319864	130320365	.	0	.
chr3	95058013	95058514	.	0	.
chr10	70159106	70159607	.	0	.
chr13	55004656	55005157	.	0	.
chr1	189228527	189229028	.	0	.
chr4	155267755	155268256	.	0	.
chr4	138543121	138543622	.	0	.
chr15	62099120	62099621	.	0	.
chr11	102770546	102771047	.	0	.
chr14	29877551	29878052	.	0	.
chr1	62591489	62591990	.	0	.
chr3	88133068	88133569	.	0	.
chr15	84352039	84352540	.	0	.
chr10	94572619	94573120	.	0	.
chr7	79531564	79532065	.	0	.
chr5	147990693	147991194	.	0	.
chr13	101553198	101553699	.	0	.
chr11	112844429	112844930	.	0	.
chr17	25445074	25445575	.	0	.
chr7	30939024	30939525	.	0	.
chr18	83014220	83014721	.	0	.
chr10	127595264	127595765	.	0	.
chr1	136227218	136227719	.	0	.
chr8	12956930	12957431	.	0	.
chr2	49570017	49570518	.	0	.
chr5	113402709	113403210	.	0	.
chr5	148615966	148616467	.	0	.
chr17	27796697	27797198	.	0	.
chr15	37729240	37729741	.	0	.
chr11	103383391	103383892	.	0	.
chr1	159889278	159889779	.	0	.
chr12	13129580	13130081	.	0	.
chr13	94134650	94135151	.	0	.
chr2	172867707	172868208	.	0	.
chr5	114914712	114915213	.	0	.
chr5	123027455	123027956	.	0	.
chr1	132893531	132894032	.	0	.
chr2	158225181	158225682	.	0	.
chr5	113788792	113789293	.	0	.
chr4	117830399	117830900	.	0	.
chr8	13529860	13530361	.	0	.
chr13	24244551	24245052	.	0	.
chr2	144445335	144445836	.	0	.
chr1	40233145	40233646	.	0	.
chr11	117319458	117319959	.	0	.
chr2	167844488	167844989	.	0	.
chr11	72991904	72992405	.	0	.
chr9	54745903	54746404	.	0	.
chr2	92988271	92988772	.	0	.
chr8	120034363	120034864	.	0	.
chr2	131652259	131652760	.	0	.
chr17	31193289	31193790	.	0	.
chr7	98504292	98504793	.	0	.
chr5	113082406	113082907	.	0	.
chr1	36920043	36920544	.	0	.
chr10	86463711	86464212	.	0	.
chr18	65124670	65125171	.	0	.
chr13	59341878	59342379	.	0	.
chr11	88524731	88525232	.	0	.
chr9	103180335	103180836	.	0	.
chr17	72863128	72863629	.	0	.
chr9	14689283	14689784	.	0	.
chr10	61308435	61308936	.	0	.
chr9	105835453	105835954	.	0	.
chr2	131401447	131401948	.	0	.
chr1	133959525	133960026	.	0	.
chr7	145102199	145102700	.	0	.
chr13	54331537	54332038	.	0	.
chr4	119901408	119901909	.	0	.
chr13	56386253	56386754	.	0	.
chr8	70753089	70753590	.	0	.
chr2	132006475	132006976	.	0	.
chr10	128225959	128226460	.	0	.
chr6	94806210	94806711	.	0	.
chr9	41890806	41891307	.	0	.
chr11	117248667	117249168	.	0	.
chr11	114780092	114780593	.	0	.
chr12	88420192	88420693	.	0	.
chr13	113378994	113379495	.	0	.
chr5	74175758	74176259	.	0	.
chr12	17033480	17033981	.	0	.
chr1	73758593	73759094	.	0	.
chr1	134195857	134196358	.	0	.
chr9	63791155	63791656	.	0	.
chr2	92496646	92497147	.	0	.
chr3	138815384	138815885	.	0	.
chr1	136095247	136095748	.	0	.
chr9	56871032	56871533	.	0	.
chr13	59238674	59239175	.	0	.
chr15	38447113	38447614	.	0	.
chr12	8445450	8445951	.	0	.
chr11	118133552	118134053	.	0	.
chr11	117882121	117882622	.	0	.
chr18	26061639	26062140	.	0	.
chr13	98651557	98652058	.	0	.
chr5	36108810	36109311	.	0	.
chr8	84148319	84148820	.	0	.
chr4	134579829	134580330	.	0	.
chr1	133077880	133078381	.	0	.
chr4	141021282	141021783	.	0	.
chr3	38015612	38016113	.	0	.
chr2	73592243	73592744	.	0	.
chr13	53309800	53310301	.	0	.
chr2	156073632	156074133	.	0	.
chr5	115474266	115474767	.	0	.
chr5	100060851	100061352	.	0	.
chr11	90054389	90054890	.	0	.
chr1	189495742	189496243	.	0	.
chr7	37010999	37011500	.	0	.
chr1	87846879	87847380	.	0	.
chr7	125559479	125559980	.	0	.
chr3	36537979	36538480	.	0	.
chr9	95428190	95428691	.	0	.
chr10	85962923	85963424	.	0	.
chr7	79844345	79844846	.	0	.
chr4	137498150	137498651	.	0	.
chr8	122517913	122518414	.	0	.
chr7	19756196	19756697	.	0	.
chr5	113492546	113493047	.	0	.
chr4	120045480	120045981	.	0	.
chr6	84194898	84195399	.	0	.
chr9	65247700	65248201	.	0	.
chr9	121079587	121080088	.	0	.
chr3	68590454	68590955	.	0	.
chr11	114246777	114247278	.	0	.
chr4	123227616	123228117	.	0	.
chr17	4199853	4200354	.	0	.
chr8	11241335	11241836	.	0	.
chr3	101012197	101012698	.	0	.
chr16	93807873	93808374	.	0	.
chr1	73702463	73702964	.	0	.
chr17	47295652	47296153	.	0	.
chr10	80629243	80629744	.	0	.
chr9	117153799	117154300	.	0	.
chr15	86096247	86096748	.	0	.
chr18	14330861	14331362	.	0	.
chr11	120199751	120200252	.	0	.
chr11	102051489	102051990	.	0	.
chr13	99124856	99125357	.	0	.
chr4	33581784	33582285	.	0	.
chr4	128637206	128637707	.	0	.
chr9	66316325	66316826	.	0	.
chr12	83277493	83277994	.	0	.
chr7	123087597	123088098	.	0	.
chr15	83691800	83692301	.	0	.
chr12	85195205	85195706	.	0	.
chr10	80058182	80058683	.	0	.
chr18	38840968	38841469	.	0	.
chr2	179653030	179653531	.	0	.
chr10	76678025	76678526	.	0	.
chr2	92525530	92526031	.	0	.
chr10	120375304	120375805	.	0	.
chr5	125074454	125074955	.	0	.
chr2	155784367	155784868	.	0	.
chr4	107984564	107985065	.	0	.
chr12	76589372	76589873	.	0	.
chr1	39381109	39381610	.	0	.
chrX	103551277	103551778	.	0	.
chr2	74965350	74965851	.	0	.
chr5	119246841	119247342	.	0	.
chr18	38907415	38907916	.	0	.
chr5	123050817	123051318	.	0	.
chr13	9695529	9696030	.	0	.
chr18	60657196	60657697	.	0	.
chr13	60687728	60688229	.	0	.
chr12	28872213	28872714	.	0	.
chr1	73822536	73823037	.	0	.
chr1	133891412	133891913	.	0	.
chr10	117669564	117670065	.	0	.
chr1	152203125	152203626	.	0	.
chr3	107188209	107188710	.	0	.
chr1	179714850	179715351	.	0	.
chr16	90880555	90881056	.	0	.
chr12	28817277	28817778	.	0	.
chr1	89412919	89413420	.	0	.
chr10	71194665	71195166	.	0	.
chr1	35926153	35926654	.	0	.
chr3	122820636	122821137	.	0	.
chr16	45427585	45428086	.	0	.
chr6	87152473	87152974	.	0	.
chr8	11273599	11274100	.	0	.
chr6	88767686	88768187	.	0	.
chr4	152558293	152558794	.	0	.
chr11	116295772	116296273	.	0	.
chr1	167292345	167292846	.	0	.
chr17	26488985	26489486	.	0	.
chr17	68103375	68103876	.	0	.
chr18	38398470	38398971	.	0	.
chr10	115774380	115774881	.	0	.
chr17	25080486	25080987	.	0	.
chr13	44306330	44306831	.	0	.
chr13	98667570	98668071	.	0	.
chr4	152214864	152215365	.	0	.
chr6	42370529	42371030	.	0	.
chr13	107493742	107494243	.	0	.
chr7	83084471	83084972	.	0	.
chr9	37013540	37014041	.	0	.
chr7	99322942	99323443	.	0	.
chr19	46518413	46518914	.	0	.
chr3	31061013	31061514	.	0	.
chr5	112958290	112958791	.	0	.
chr7	142321275	142321776	.	0	.
chr9	7867867	7868368	.	0	.
chr9	41766480	41766981	.	0	.
chr2	163397891	163398392	.	0	.
chr11	116812609	116813110	.	0	.
chr17	86330182	86330683	.	0	.
chr5	24797847	24798348	.	0	.
chr4	114739277	114739778	.	0	.
chr1	91031449	91031950	.	0	.
chr3	122360632	122361133	.	0	.
chr2	174112992	174113493	.	0	.
chr1	90775739	90776240	.	0	.
chr3	109309208	109309709	.	0	.
chr9	108982632	108983133	.	0	.
chr11	89028052	89028553	.	0	.
chr11	54884880	54885381	.	0	.
chr7	79646633	79647134	.	0	.
chr13	73735107	73735608	.	0	.
chr8	120285063	120285564	.	0	.
chr5	65039114	65039615	.	0	.
chr1	92379022	92379523	.	0	.
chr9	119457139	119457640	.	0	.
chr3	51247630	51248131	.	0	.
chr7	79202273	79202774	.	0	.
chr3	130127742	130128243	.	0	.
chr1	92130331	92130832	.	0	.
chr14	33500642	33501143	.	0	.
chr1	89539107	89539608	.	0	.
chr6	84325668	84326169	.	0	.
chr17	8525369	8525870	.	0	.
chr16	22789945	22790446	.	0	.
chr17	51583224	51583725	.	0	.
chr15	66314068	66314569	.	0	.
chr1	154190171	154190672	.	0	.
chr11	113056044	113056545	.	0	.
chr8	10910273	10910774	.	0	.
chr16	30542840	30543341	.	0	.
chr16	18464232	18464733	.	0	.
chr14	60756244	60756745	.	0	.
chr16	18159717	18160218	.	0	.
chr10	78129362	78129863	.	0	.
chr3	153078097	153078598	.	0	.
chr2	124369920	124370421	.	0	.
chr15	79203733	79204234	.	0	.
chr15	34821188	34821689	.	0	.
chr13	53204958	53205459	.	0	.
chr15	78293229	78293730	.	0	.
chr5	34543113	34543614	.	0	.
chr15	80366823	80367324	.	0	.
chr18	38512771	38513272	.	0	.
chr4	97476776	97477277	.	0	.
chr4	117272327	117272828	.	0	.
chr17	44613899	44614400	.	0	.
chr15	34846483	34846984	.	0	.
chr10	69583678	69584179	.	0	.
chr4	63278821	63279322	.	0	.
chr17	27240455	27240956	.	0	.
chr8	120046596	120047097	.	0	.
chr8	120067770	120068271	.	0	.
chr9	115139649	115140150	.	0	.
chr1	87520507	87521008	.	0	.
chr2	27798965	27799466	.	0	.
chr4	138601907	138602408	.	0	.
chr3	52007531	52008032	.	0	.
chr19	6474552	6475053	.	0	.
chr8	61359757	61360258	.	0	.
chr9	48786734	48787235	.	0	.
chr19	10272741	10273242	.	0	.
chr4	47136728	47137229	.	0	.
chr17	83238404	83238905	.	0	.
chr6	114459675	114460176	.	0	.
chr3	130086609	130087110	.	0	.
chr11	115441340	115441841	.	0	.
chr17	46104340	46104841	.	0	.
chr9	67541906	67542407	.	0	.
chr17	25623780	25624281	.	0	.
chr8	123150576	123151077	.	0	.
chr10	70059912	70060413	.	0	.
chr5	140581593	140582094	.	0	.
chr10	111329127	111329628	.	0	.
chr2	30589070	30589571	.	0	.
chr7	133862983	133863484	.	0	.
chr18	38484077	38484578	.	0	.
chr17	50470352	50470853	.	0	.
chr17	29117937	29118438	.	0	.
chr11	75152726	75153227	.	0	.
chr11	102834128	102834629	.	0	.
chr16	37974087	37974588	.	0	.
chr2	92726655	92727156	.	0	.
chr4	128947289	128947790	.	0	.
chr14	31400901	31401402	.	0	.
chr16	34909376	34909877	.	0	.
chr18	68495708	68496209	.	0	.
chr4	124742758	124743259	.	0	.
chr5	119207970	119208471	.	0	.
chr1	134055834	134056335	.	0	.
chr2	91971270	91971771	.	0	.
chr16	92451657	92452158	.	0	.
chr2	158216405	158216906	.	0	.
chr6	52802197	52802698	.	0	.
chr1	181466626	181467127	.	0	.
chr8	117093993	117094494	.	0	.
chr6	128078475	128078976	.	0	.
chr15	84413340	84413841	.	0	.
chr9	53321236	53321737	.	0	.
chr7	83951326	83951827	.	0	.
chr17	25509127	25509628	.	0	.
chr1	92676354	92676855	.	0	.
chr7	142330086	142330587	.	0	.
chr9	30844133	30844634	.	0	.
chr17	49887081	49887582	.	0	.
chr7	137726020	137726521	.	0	.
chr5	146324856	146325357	.	0	.
chr1	153969318	153969819	.	0	.
chr4	136116908	136117409	.	0	.
chr16	94722131	94722632	.	0	.
chr7	142332770	142333271	.	0	.
chr18	11816808	11817309	.	0	.
chr6	114453332	114453833	.	0	.
chr11	35668629	35669130	.	0	.
chr2	167586912	167587413	.	0	.
chr8	120521768	120522269	.	0	.
chr4	142149698	142150199	.	0	.
chr5	73729661	73730162	.	0	.
chr7	125868523	125869024	.	0	.
chr13	51274632	51275133	.	0	.
chr3	138821900	138822401	.	0	.
chr1	92376384	92376885	.	0	.
chr18	82106782	82107283	.	0	.
chr4	119935686	119936187	.	0	.
chr18	68943304	68943805	.	0	.
chr10	7111585	7112086	.	0	.
chr13	60078293	60078794	.	0	.
chr6	127932764	127933265	.	0	.
chr11	118471448	118471949	.	0	.
chr5	123895740	123896241	.	0	.
chrX	73476590	73477091	.	0	.
chr8	22751022	22751523	.	0	.
chr3	97160836	97161337	.	0	.
chr19	40716894	40717395	.	0	.
chr18	64471477	64471978	.	0	.
chr13	13573660	13574161	.	0	.
chr7	142680114	142680615	.	0	.
chr15	58286970	58287471	.	0	.
chr5	134352672	134353173	.	0	.
chr11	121014860	121015361	.	0	.
chr18	25645778	25646279	.	0	.
chr8	11381880	11382381	.	0	.
chr6	114851606	114852107	.	0	.
chr4	128184707	128185208	.	0	.
chr2	92511950	92512451	.	0	.
chr11	117326779	117327280	.	0	.
chr14	74646607	74647108	.	0	.
chr10	7118391	7118892	.	0	.
chr9	106406455	106406956	.	0	.
chr13	97837441	97837942	.	0	.
chr13	97775000	97775501	.	0	.
chr15	11802418	11802919	.	0	.
chr10	83163997	83164498	.	0	.
chr9	65248201	65248702	.	0	.
chr1	91781129	91781630	.	0	.
chr10	86264612	86265113	.	0	.
chr4	63097483	63097984	.	0	.
chr16	66016948	66017449	.	0	.
chr7	45501419	45501920	.	0	.
chr1	136061293	136061794	.	0	.
chr8	84834955	84835456	.	0	.
chr1	159670767	159671268	.	0	.
chr11	95559757	95560258	.	0	.
chr18	38631394	38631895	.	0	.
chr6	29146444	29146945	.	0	.
chr12	70144152	70144653	.	0	.
chr17	73251793	73252294	.	0	.
chr7	66912716	66913217	.	0	.
chr5	146867495	146867996	.	0	.
chr17	65674815	65675316	.	0	.
chr17	73258584	73259085	.	0	.
chr6	114869859	114870360	.	0	.
chr8	11450036	11450537	.	0	.
chr1	136228312	136228813	.	0	.
chr17	46885871	46886372	.	0	.
chr7	63755180	63755681	.	0	.
chr9	95194067	95194568	.	0	.
chr5	115866571	115867072	.	0	.
chr11	102624161	102624662	.	0	.
chr10	128977547	128978048	.	0	.
chr15	79044856	79045357	.	0	.
chr11	50635262	50635763	.	0	.
chr1	73952597	73953098	.	0	.
chr11	101831955	101832456	.	0	.
chr14	55933589	55934090	.	0	.
chr18	74899920	74900421	.	0	.
chr1	91328765	91329266	.	0	.
chr12	80527579	80528080	.	0	.
chr19	56105615	56106116	.	0	.
chr7	24480071	24480572	.	0	.
chr9	115332953	115333454	.	0	.
chr13	44260788	44261289	.	0	.
chr4	156026011	156026512	.	0	.
chr7	124681172	124681673	.	0	.
chr16	13149280	13149781	.	0	.
chr8	23138233	23138734	.	0	.
chr11	95073898	95074399	.	0	.
chr9	56900599	56901100	.	0	.
chr18	34546989	34547490	.	0	.
chr10	75444418	75444919	.	0	.
chr5	93101248	93101749	.	0	.
chr15	56807586	56808087	.	0	.
chr5	36174826	36175327	.	0	.
chr12	117755923	117756424	.	0	.
chr8	124305529	124306030	.	0	.
chr5	34170747	34171248	.	0	.
chr16	95769595	95770096	.	0	.
chr14	25192561	25193062	.	0	.
chr11	75172282	75172783	.	0	.
chr3	100429972	100430473	.	0	.
chr11	80176899	80177400	.	0	.
chr5	112927845	112928346	.	0	.
chr7	139908321	139908822	.	0	.
chr17	25648592	25649093	.	0	.
chr1	189165658	189166159	.	0	.
chr1	36080911	36081412	.	0	.
chr11	34010604	34011105	.	0	.
chr11	102207753	102208254	.	0	.
chr2	128323966	128324467	.	0	.
chr5	147895387	147895888	.	0	.
chr14	66441819	66442320	.	0	.
chr3	38232365	38232866	.	0	.
chr7	37064690	37065191	.	0	.
chr13	112753566	112754067	.	0	.
chr2	92417972	92418473	.	0	.
chr18	38929384	38929885	.	0	.
chr11	6481124	6481625	.	0	.
chr4	123237732	123238233	.	0	.
chr5	135465724	135466225	.	0	.
chr1	130763935	130764436	.	0	.
chr3	152997886	152998387	.	0	.
chr11	16800403	16800904	.	0	.
chr2	135692527	135693028	.	0	.
chr10	61732248	61732749	.	0	.
chr7	137197574	137198075	.	0	.
chr5	143579752	143580253	.	0	.
chr4	62705651	62706152	.	0	.
chr10	14100035	14100536	.	0	.
chr9	95168488	95168989	.	0	.
chr6	140733501	140734002	.	0	.
chr10	42088997	42089498	.	0	.
chr7	16808546	16809047	.	0	.
chr11	51351804	51352305	.	0	.
chr4	138602562	138603063	.	0	.
chr11	46277972	46278473	.	0	.
chr2	167373217	167373718	.	0	.
chr14	79206129	79206630	.	0	.
chr16	33158421	33158922	.	0	.
chr12	29639690	29640191	.	0	.
chr3	105405998	105406499	.	0	.
chr12	111920044	111920545	.	0	.
chr2	159096697	159097198	.	0	.
chr3	102062341	102062842	.	0	.
chr12	112210508	112211009	.	0	.
chr5	123497658	123498159	.	0	.
chr2	172885853	172886354	.	0	.
chr8	13668343	13668844	.	0	.
chr9	35328466	35328967	.	0	.
chr6	101318471	101318972	.	0	.
chr5	35728850	35729351	.	0	.
chr17	17862323	17862824	.	0	.
chr17	61474245	61474746	.	0	.
chr11	83448115	83448616	.	0	.
chr14	65659089	65659590	.	0	.
chr4	63437445	63437946	.	0	.
chr2	144224344	144224845	.	0	.
chr8	119635295	119635796	.	0	.
chr2	152820255	152820756	.	0	.
chr2	163539289	163539790	.	0	.
chr1	135574622	135575123	.	0	.
chr6	39423226	39423727	.	0	.
chr11	96906431	96906932	.	0	.
chr15	27480178	27480679	.	0	.
chr5	134895246	134895747	.	0	.
chr9	33549321	33549822	.	0	.
chr10	71195451	71195952	.	0	.
chr1	91312914	91313415	.	0	.
chr5	124351018	124351519	.	0	.
chr15	59622136	59622637	.	0	.
chr7	79421664	79422165	.	0	.
chr15	81932880	81933381	.	0	.
chr6	112401988	112402489	.	0	.
chr2	168491714	168492215	.	0	.
chr16	96727808	96728309	.	0	.
chr15	37433138	37433639	.	0	.
chr14	118922075	118922576	.	0	.
chr18	11983198	11983699	.	0	.
chr1	39393999	39394500	.	0	.
chr8	107944451	107944952	.	0	.
chr7	112204544	112205045	.	0	.
chr7	109891736	109892237	.	0	.
chr5	120008178	120008679	.	0	.
chr12	100965643	100966144	.	0	.
chr7	37025008	37025509	.	0	.
chr11	88186267	88186768	.	0	.
chr14	47823689	47824190	.	0	.
chr17	48028198	48028699	.	0	.
chr19	26758559	26759060	.	0	.
chr1	40265818	40266319	.	0	.
chr10	83140738	83141239	.	0	.
chr4	86498599	86499100	.	0	.
chr16	18459955	18460456	.	0	.
chr14	70106522	70107023	.	0	.
chr18	61348114	61348615	.	0	.
chr18	74641983	74642484	.	0	.
chr2	167900116	167900617	.	0	.
chr1	154999638	155000139	.	0	.
chr13	70746342	70746843	.	0	.
chr16	90882603	90883104	.	0	.
chr4	139563070	139563571	.	0	.
chr2	151967156	151967657	.	0	.
chr2	69129037	69129538	.	0	.
chr4	134122166	134122667	.	0	.
chr2	167877105	167877606	.	0	.
chr9	60119749	60120250	.	0	.
chr17	48816619	48817120	.	0	.
chr5	113789350	113789851	.	0	.
chr16	30736902	30737403	.	0	.
chr17	44546596	44547097	.	0	.
chr8	87660375	87660876	.	0	.
chr1	193197750	193198251	.	0	.
chr5	135280339	135280840	.	0	.
chr15	93711363	93711864	.	0	.
chr15	84293711	84294212	.	0	.
chr13	95535349	95535850	.	0	.
chr12	79943228	79943729	.	0	.
chr3	156928333	156928834	.	0	.
chr7	25386163	25386664	.	0	.
chr11	54833035	54833536	.	0	.
chr1	171239992	171240493	.	0	.
chr6	88147384	88147885	.	0	.
chr18	74904925	74905426	.	0	.
chr17	45629423	45629924	.	0	.
chr5	75701652	75702153	.	0	.
chr6	119565879	119566380	.	0	.
chr5	92390523	92391024	.	0	.
chr9	22814342	22814843	.	0	.
chr13	51920436	51920937	.	0	.
chr12	111852892	111853393	.	0	.
chr2	31006374	31006875	.	0	.
chr13	97858968	97859469	.	0	.
chr8	115199721	115200222	.	0	.
chr10	77209294	77209795	.	0	.
chr5	113510108	113510609	.	0	.
chr11	119937211	119937712	.	0	.
chr17	6751592	6752093	.	0	.
chr9	15552272	15552773	.	0	.
chr11	72389349	72389850	.	0	.
chr4	141463392	141463893	.	0	.
chr11	16895642	16896143	.	0	.
chr13	52222194	52222695	.	0	.
chr19	47398231	47398732	.	0	.
chr8	10899053	10899554	.	0	.
chr2	169838200	169838701	.	0	.
chr16	18153716	18154217	.	0	.
chr1	154065917	154066418	.	0	.
chr1	131811972	131812473	.	0	.
chr1	192527783	192528284	.	0	.
chr7	4128760	4129261	.	0	.
chr14	32091036	32091537	.	0	.
chr9	66872307	66872808	.	0	.
chr11	113050554	113051055	.	0	.
chr2	59841036	59841537	.	0	.
chr9	98642668	98643169	.	0	.
chr1	137644642	137645143	.	0	.
chr15	27796168	27796669	.	0	.
chr7	66442470	66442971	.	0	.
chr6	84194342	84194843	.	0	.
chr2	49582429	49582930	.	0	.
chr4	149529734	149530235	.	0	.
chr4	47587188	47587689	.	0	.
chr13	24261053	24261554	.	0	.
chr14	103843513	103844014	.	0	.
chr18	14202049	14202550	.	0	.
chr10	75373755	75374256	.	0	.
chr2	158799240	158799741	.	0	.
chr9	51239002	51239503	.	0	.
chr2	33575284	33575785	.	0	.
chr8	13529028	13529529	.	0	.
chr16	35681631	35682132	.	0	.
chr12	81155656	81156157	.	0	.
chr5	149128428	149128929	.	0	.
chr5	35058545	35059046	.	0	.
chr19	18599076	18599577	.	0	.
chr1	152457570	152458071	.	0	.
chr15	32042111	32042612	.	0	.
chr18	11144831	11145332	.	0	.
chr8	110650819	110651320	.	0	.
chr5	73701567	73702068	.	0	.
chr18	60663905	60664406	.	0	.
chr10	94523666	94524167	.	0	.
chr1	88474475	88474976	.	0	.
chr5	129971385	129971886	.	0	.
chr16	28858414	28858915	.	0	.
chr14	63204857	63205358	.	0	.
chr14	46923914	46924415	.	0	.
chr10	119075068	119075569	.	0	.
chr17	86300826	86301327	.	0	.
chr17	26397345	26397846	.	0	.
chr18	68943878	68944379	.	0	.
chr10	94804005	94804506	.	0	.
chr14	59643473	59643974	.	0	.
chr11	88584040	88584541	.	0	.
chr5	138778747	138779248	.	0	.
chr2	31902151	31902652	.	0	.
chr2	25110817	25111318	.	0	.
chr2	109558979	109559480	.	0	.
chr9	111055415	111055916	.	0	.
chr2	158232441	158232942	.	0	.
chr6	100529614	100530115	.	0	.
chr6	91719292	91719793	.	0	.
chr10	61987546	61988047	.	0	.
chr17	25079181	25079682	.	0	.
chr3	105300779	105301280	.	0	.
chr15	27941267	27941768	.	0	.
chr19	57411748	57412249	.	0	.
chr2	154555282	154555783	.	0	.
chr12	76603895	76604396	.	0	.
chr11	79885811	79886312	.	0	.
chr5	113921816	113922317	.	0	.
chr12	102361110	102361611	.	0	.
chr5	141916899	141917400	.	0	.
chr12	76863590	76864091	.	0	.
chr5	114793260	114793761	.	0	.
chr8	125722550	125723051	.	0	.
chr8	114446056	114446557	.	0	.
chr18	60992996	60993497	.	0	.
chr8	125222916	125223417	.	0	.
chr2	117217839	117218340	.	0	.
chr11	32235523	32236024	.	0	.
chr1	149862691	149863192	.	0	.
chr11	34824758	34825259	.	0	.
chr4	149840918	149841419	.	0	.
chr15	83293589	83294090	.	0	.
chr2	32914799	32915300	.	0	.
chr12	83767788	83768289	.	0	.
chr8	35940337	35940838	.	0	.
chr8	123732299	123732800	.	0	.
chr5	77372255	77372756	.	0	.
chr8	11411138	11411639	.	0	.
chr5	148342338	148342839	.	0	.
chr11	85846505	85847006	.	0	.
chr2	30265741	30266242	.	0	.
chr5	34542569	34543070	.	0	.
chr7	43355080	43355581	.	0	.
chr4	125727054	125727555	.	0	.
chr11	113029071	113029572	.	0	.
chr17	26575795	26576296	.	0	.
chr13	51573849	51574350	.	0	.
chr3	103473212	103473713	.	0	.
chr6	84429256	84429757	.	0	.
chr7	109628828	109629329	.	0	.
chr18	38906318	38906819	.	0	.
chr8	25252546	25253047	.	0	.
chr2	31826018	31826519	.	0	.
chr15	100808327	100808828	.	0	.
chr6	126034669	126035170	.	0	.
chr11	106659312	106659813	.	0	.
chr12	83726046	83726547	.	0	.
chr9	60457348	60457849	.	0	.
chr5	35925343	35925844	.	0	.
chr1	134057610	134058111	.	0	.
chr16	20700058	20700559	.	0	.
chr11	50717243	50717744	.	0	.
chr10	111102240	111102741	.	0	.
chr4	101268524	101269025	.	0	.
chr4	130101159	130101660	.	0	.
chr16	31606392	31606893	.	0	.
chr5	121833745	121834246	.	0	.
chr4	11734087	11734588	.	0	.
chr5	111578010	111578511	.	0	.
chr6	91730474	91730975	.	0	.
chr6	94805531	94806032	.	0	.
chr3	51169626	51170127	.	0	.
chr5	136217023	136217524	.	0	.
chr8	122149697	122150198	.	0	.
chr13	98573360	98573861	.	0	.
chr4	85958641	85959142	.	0	.
chr8	125282478	125282979	.	0	.
chr5	119449110	119449611	.	0	.
chr11	31464810	31465311	.	0	.
chr19	40549912	40550413	.	0	.
chr7	44863564	44864065	.	0	.
chr2	133522054	133522555	.	0	.
chr1	35926656	35927157	.	0	.
chr2	170006368	170006869	.	0	.
chr6	120978176	120978677	.	0	.
chr1	74096547	74097048	.	0	.
chr18	60625191	60625692	.	0	.
chr9	45120883	45121384	.	0	.
chr4	137432792	137433293	.	0	.
chr10	77583849	77584350	.	0	.
chr12	17184185	17184686	.	0	.
chr18	60651845	60652346	.	0	.
chr11	73236228	73236729	.	0	.
chr11	8496576	8497077	.	0	.
chr7	25379673	25380174	.	0	.
chr4	63744717	63745218	.	0	.
chr9	111080787	111081288	.	0	.
chr8	120860675	120861176	.	0	.
chr17	25647864	25648365	.	0	.
chr11	112978765	112979266	.	0	.
chr11	55015808	55016309	.	0	.
chr7	66516088	66516589	.	0	.
chr11	43483268	43483769	.	0	.
chr9	61537013	61537514	.	0	.
chr5	139719064	139719565	.	0	.
chr4	128269218	128269719	.	0	.
chr2	172862505	172863006	.	0	.
chr6	135237349	135237850	.	0	.
chr4	152532807	152533308	.	0	.
chr9	29680630	29681131	.	0	.
chr10	79852071	79852572	.	0	.
chr2	33546900	33547401	.	0	.
chr1	21008810	21009311	.	0	.
chr8	48126058	48126559	.	0	.
chr7	113110808	113111309	.	0	.
chr2	102415999	102416500	.	0	.
chr8	12905122	12905623	.	0	.
chr17	25761682	25762183	.	0	.
chr18	74347847	74348348	.	0	.
chr18	50051569	50052070	.	0	.
chr15	31258944	31259445	.	0	.
chr4	47604007	47604508	.	0	.
chr2	174903518	174904019	.	0	.
chr10	83217591	83218092	.	0	.
chr2	131190594	131191095	.	0	.
chr12	84894213	84894714	.	0	.
chr12	8428588	8429089	.	0	.
chr17	14672347	14672848	.	0	.
chr3	37936111	37936612	.	0	.
chr19	40550542	40551043	.	0	.
chr1	86677552	86678053	.	0	.
chr5	146907570	146908071	.	0	.
chr11	101820745	101821246	.	0	.
chr9	118960239	118960740	.	0	.
chr6	140300441	140300942	.	0	.
chr13	56634754	56635255	.	0	.
chr11	116643728	116644229	.	0	.
chr13	37617038	37617539	.	0	.
chr10	81302822	81303323	.	0	.
chr1	89522070	89522571	.	0	.
chr17	86798793	86799294	.	0	.
chr19	56300937	56301438	.	0	.
chr9	42217714	42218215	.	0	.
chr1	153885989	153886490	.	0	.
chr4	142221472	142221973	.	0	.
chr2	92020838	92021339	.	0	.
chr3	108962816	108963317	.	0	.
chr5	100191455	100191956	.	0	.
chr4	11672715	11673216	.	0	.
chr18	74893839	74894340	.	0	.
chr5	103628831	103629332	.	0	.
chr17	87328111	87328612	.	0	.
chr1	90651517	90652018	.	0	.
chr5	122311801	122312302	.	0	.
chr10	61331026	61331527	.	0	.
chr12	103359090	103359591	.	0	.
chr15	77863019	77863520	.	0	.
chr11	59397291	59397792	.	0	.
chr4	63276385	63276886	.	0	.
chrX	97376334	97376835	.	0	.
chr11	118729402	118729903	.	0	.
chr5	136888565	136889066	.	0	.
chr6	145689179	145689680	.	0	.
chr1	92137164	92137665	.	0	.
chr8	12801527	12802028	.	0	.
chr5	24540448	24540949	.	0	.
chr12	86932100	86932601	.	0	.
chr11	116554116	116554617	.	0	.
chr4	63459309	63459810	.	0	.
chr2	166605410	166605911	.	0	.
chr4	105286434	105286935	.	0	.
chr10	115364238	115364739	.	0	.
chr1	131739471	131739972	.	0	.
chr8	115249676	115250177	.	0	.
chr8	117314511	117315012	.	0	.
chr2	167250126	167250627	.	0	.
chr14	32950311	32950812	.	0	.
chr10	59974759	59975260	.	0	.
chr13	97978885	97979386	.	0	.
chr19	47431560	47432061	.	0	.
chr7	25708084	25708585	.	0	.
chr13	42828847	42829348	.	0	.
chr17	29235997	29236498	.	0	.
chr2	109554550	109555051	.	0	.
chr11	101885219	101885720	.	0	.
chr5	25058451	25058952	.	0	.
chr2	92645676	92646177	.	0	.
chr9	32292532	32293033	.	0	.
chr2	27848337	27848838	.	0	.
chr2	165055365	165055866	.	0	.
chr9	70891362	70891863	.	0	.
chr18	47240426	47240927	.	0	.
chr19	44382942	44383443	.	0	.
chr15	66676929	66677430	.	0	.
chr4	117997594	117998095	.	0	.
chr3	100365574	100366075	.	0	.
chr15	99333436	99333937	.	0	.
chr17	8893134	8893635	.	0	.
chr2	75618712	75619213	.	0	.
chr15	58281306	58281807	.	0	.
chr10	94479501	94480002	.	0	.
chr4	119947838	119948339	.	0	.
chr3	154692140	154692641	.	0	.
chr7	100496210	100496711	.	0	.
chr1	75338315	75338816	.	0	.
chr4	57846884	57847385	.	0	.
chr5	105649382	105649883	.	0	.
chr8	84987887	84988388	.	0	.
chr4	55125406	55125907	.	0	.
chr7	99295049	99295550	.	0	.
chr10	90965837	90966338	.	0	.
chr15	83025430	83025931	.	0	.
chr18	4924879	4925380	.	0	.
chr8	26627129	26627630	.	0	.
chr15	78839732	78840233	.	0	.
chr4	150724952	150725453	.	0	.
chr6	34344874	34345375	.	0	.
chr14	25480882	25481383	.	0	.
chr2	144190906	144191407	.	0	.
chr1	167259540	167260041	.	0	.
chr1	130854765	130855266	.	0	.
chr13	43374137	43374638	.	0	.
chr1	40829236	40829737	.	0	.
chr12	85145533	85146034	.	0	.
chr1	40117583	40118084	.	0	.
chr4	48592391	48592892	.	0	.
chr18	82797846	82798347	.	0	.
chr2	118491317	118491818	.	0	.
chr19	53022243	53022744	.	0	.
chr18	38973308	38973809	.	0	.
chr3	88133606	88134107	.	0	.
chr8	108424297	108424798	.	0	.
chr18	64476818	64477319	.	0	.
chr7	6885396	6885897	.	0	.
chr5	74924075	74924576	.	0	.
chr11	4697585	4698086	.	0	.
chr2	158854994	158855495	.	0	.
chr12	109439927	109440428	.	0	.
chr9	32400891	32401392	.	0	.
chr11	57732497	57732998	.	0	.
chr14	72389634	72390135	.	0	.
chr4	132941039	132941540	.	0	.
chr16	33768374	33768875	.	0	.
chr2	142334442	142334943	.	0	.
chr9	54671964	54672465	.	0	.
chr18	73665310	73665811	.	0	.
chr9	58134013	58134514	.	0	.
chr7	96816930	96817431	.	0	.
chr2	71988547	71989048	.	0	.
chr15	98722801	98723302	.	0	.
chr9	31315995	31316496	.	0	.
chr8	121294578	121295079	.	0	.
chr5	113024120	113024621	.	0	.
chr6	72663013	72663514	.	0	.
chr2	148552134	148552635	.	0	.
chr14	119831313	119831814	.	0	.
chr6	43292629	43293130	.	0	.
chr11	103218119	103218620	.	0	.
chr6	86059227	86059728	.	0	.
chr1	151890249	151890750	.	0	.
chr5	113513830	113514331	.	0	.
chr7	118777857	118778358	.	0	.
chr4	130836896	130837397	.	0	.
chr18	5459012	5459513	.	0	.
chr13	60012296	60012797	.	0	.
chr8	94134581	94135082	.	0	.
chr5	140208664	140209165	.	0	.
chr5	23816591	23817092	.	0	.
chr11	118503979	118504480	.	0	.
chr4	137464852	137465353	.	0	.
chr11	88605078	88605579	.	0	.
chr11	80177448	80177949	.	0	.
chr10	127721084	127721585	.	0	.
chr1	189882902	189883403	.	0	.
chr16	10668383	10668884	.	0	.
chr5	142525108	142525609	.	0	.
chr9	116649387	116649888	.	0	.
chr8	8388606	8389107	.	0	.
chr2	144160228	144160729	.	0	.
chr19	10952524	10953025	.	0	.
chr1	73820477	73820978	.	0	.
chr11	121082426	121082927	.	0	.
chr9	30522635	30523136	.	0	.
chr13	63990573	63991074	.	0	.
chr8	94377520	94378021	.	0	.
chr2	7270024	7270525	.	0	.
chr5	123613136	123613637	.	0	.
chr2	84886920	84887421	.	0	.
chr4	55848358	55848859	.	0	.
chr10	60194975	60195476	.	0	.
chr8	23138885	23139386	.	0	.
chr5	106119550	106120051	.	0	.
chr5	134394562	134395063	.	0	.
chr12	25240078	25240579	.	0	.
chr6	47494553	47495054	.	0	.
chr9	51075657	51076158	.	0	.
chr1	189305488	189305989	.	0	.
chr7	63754638	63755139	.	0	.
chr4	57855382	57855883	.	0	.
chr7	92457777	92458278	.	0	.
chr2	167377675	167378176	.	0	.
chr8	121376021	121376522	.	0	.
chr15	93706334	93706835	.	0	.
chr13	69033503	69034004	.	0	.
chr15	78669233	78669734	.	0	.
chr15	86054703	86055204	.	0	.
chr3	100925152	100925653	.	0	.
chr19	16598819	16599320	.	0	.
chr5	34988635	34989136	.	0	.
chr4	98339954	98340455	.	0	.
chr19	56232302	56232803	.	0	.
chr17	64752315	64752816	.	0	.
chr4	147938069	147938570	.	0	.
chr2	92659519	92660020	.	0	.
chr13	32481340	32481841	.	0	.
chr9	96450889	96451390	.	0	.
chr14	63183196	63183697	.	0	.
chr8	121272886	121273387	.	0	.
chr13	43516943	43517444	.	0	.
chr16	11045136	11045637	.	0	.
chr4	132984108	132984609	.	0	.
chr17	31192524	31193025	.	0	.
chr12	107925253	107925754	.	0	.
chr8	10927792	10928293	.	0	.
chr11	116016383	116016884	.	0	.
chr12	70679964	70680465	.	0	.
chr9	37031286	37031787	.	0	.
chr11	108300322	108300823	.	0	.
chr12	4285084	4285585	.	0	.
chr18	38596914	38597415	.	0	.
chr4	133103842	133104343	.	0	.
chr17	35814472	35814973	.	0	.
chr1	168234318	168234819	.	0	.
chr19	3921357	3921858	.	0	.
chr9	118767188	118767689	.	0	.
chr10	61308946	61309447	.	0	.
chr1	171249326	171249827	.	0	.
chr15	79201784	79202285	.	0	.
chr2	49349719	49350220	.	0	.
chr11	85541762	85542263	.	0	.
chr2	172931421	172931922	.	0	.
chr8	11297478	11297979	.	0	.
chr13	48873415	48873916	.	0	.
chr6	90319779	90320280	.	0	.
chr8	13028473	13028974	.	0	.
chr7	37338017	37338518	.	0	.
chr7	64567384	64567885	.	0	.
chr5	33195119	33195620	.	0	.
chrX	73480369	73480870	.	0	.
chr8	87940615	87941116	.	0	.
chr2	130353839	130354340	.	0	.
chr3	89868331	89868832	.	0	.
chr18	39298697	39299198	.	0	.
chr2	167729818	167730319	.	0	.
chr11	85492158	85492659	.	0	.
chr1	135763678	135764179	.	0	.
chr7	127869098	127869599	.	0	.
chr6	121261158	121261659	.	0	.
chr15	10572133	10572634	.	0	.
chr1	168301289	168301790	.	0	.
chr2	92617526	92618027	.	0	.
chr6	100929148	100929649	.	0	.
chr7	99290766	99291267	.	0	.
chr19	37026377	37026878	.	0	.
chr12	76603269	76603770	.	0	.
chr11	6104688	6105189	.	0	.
chr4	152697219	152697720	.	0	.
chr16	33917852	33918353	.	0	.
chr17	83913697	83914198	.	0	.
chr13	37282457	37282958	.	0	.
chr11	62224779	62225280	.	0	.
chr10	83062305	83062806	.	0	.
chr7	27467464	27467965	.	0	.
chr9	120918485	120918986	.	0	.
chr3	88140562	88141063	.	0	.
chr1	192070624	192071125	.	0	.
chr11	113147403	113147904	.	0	.
chr9	37625632	37626133	.	0	.
chr13	54248549	54249050	.	0	.
chrX	101983583	101984084	.	0	.
chr9	118963121	118963622	.	0	.
chr6	127792472	127792973	.	0	.
chr17	74922549	74923050	.	0	.
chr17	31944107	31944608	.	0	.
chr17	86330695	86331196	.	0	.
chr6	136871297	136871798	.	0	.
chr4	133706906	133707407	.	0	.
chr19	10264932	10265433	.	0	.
chr1	153501524	153502025	.	0	.
chr14	7900642	7901143	.	0	.
chr8	121187544	121188045	.	0	.
chr3	107183139	107183640	.	0	.
chr19	6553789	6554290	.	0	.
chr1	59434566	59435067	.	0	.
chr17	4735118	4735619	.	0	.
chr11	4283605	4284106	.	0	.
chr11	22629538	22630039	.	0	.
chr19	47891878	47892379	.	0	.
chr16	38533095	38533596	.	0	.
chr12	112518267	112518768	.	0	.
chr12	104262887	104263388	.	0	.
chr11	97822808	97823309	.	0	.
chr17	47295133	47295634	.	0	.
chr1	170659232	170659733	.	0	.
chr7	63956876	63957377	.	0	.
chr9	65672914	65673415	.	0	.
chr8	110792886	110793387	.	0	.
chr3	100394618	100395119	.	0	.
chr2	16738163	16738664	.	0	.
chr9	103076634	103077135	.	0	.
chr10	119076274	119076775	.	0	.
chr3	101711188	101711689	.	0	.
chr5	113306946	113307447	.	0	.
chr8	8490385	8490886	.	0	.
chr1	67083316	67083817	.	0	.
chr14	34565156	34565657	.	0	.
chr10	23156879	23157380	.	0	.
chr12	79931474	79931975	.	0	.
chr5	125111063	125111564	.	0	.
chr17	50369168	50369669	.	0	.
chr8	46570594	46571095	.	0	.
chr11	101162133	101162634	.	0	.
chr2	49655385	49655886	.	0	.
chr8	84322725	84323226	.	0	.
chr19	41675481	41675982	.	0	.
chr4	3648949	3649450	.	0	.
chr15	61770778	61771279	.	0	.
chr5	147921610	147922111	.	0	.
chr10	61216181	61216682	.	0	.
chr6	136938649	136939150	.	0	.
chr1	165589178	165589679	.	0	.
chr2	160002668	160003169	.	0	.
chr3	10135837	10136338	.	0	.
chr7	128379374	128379875	.	0	.
chr1	131964012	131964513	.	0	.
chr2	31454476	31454977	.	0	.
chr11	79738414	79738915	.	0	.
chr8	124630409	124630910	.	0	.
chr7	70633935	70634436	.	0	.
chr9	36905395	36905896	.	0	.
chr5	134541647	134542148	.	0	.
chr13	103014576	103015077	.	0	.
chr4	126099667	126100168	.	0	.
chr14	33296638	33297139	.	0	.
chr2	50690120	50690621	.	0	.
chr11	118727956	118728457	.	0	.
chr2	167797967	167798468	.	0	.
chr6	101293017	101293518	.	0	.
chr2	166073119	166073620	.	0	.
chr18	25634478	25634979	.	0	.
chr4	123246355	123246856	.	0	.
chr8	106906042	106906543	.	0	.
chr12	76972619	76973120	.	0	.
chr11	99147191	99147692	.	0	.
chr5	31076727	31077228	.	0	.
chr2	166129020	166129521	.	0	.
chr11	31591705	31592206	.	0	.
chr9	116138506	116139007	.	0	.
chr7	141434333	141434834	.	0	.
chr15	78483306	78483807	.	0	.
chr13	58002921	58003422	.	0	.
chr16	94041273	94041774	.	0	.
chr16	90694974	90695475	.	0	.
chr9	116099817	116100318	.	0	.
chr14	70474971	70475472	.	0	.
chr8	119464344	119464845	.	0	.
chr10	86890473	86890974	.	0	.
chr9	30919572	30920073	.	0	.
chr13	44409297	44409798	.	0	.
chr2	49580450	49580951	.	0	.
chr11	103140993	103141494	.	0	.
chr13	34919526	34920027	.	0	.
chr11	101867274	101867775	.	0	.
chr18	38654475	38654976	.	0	.
chr8	125227179	125227680	.	0	.
chr19	46422519	46423020	.	0	.
chr14	57758178	57758679	.	0	.
chr8	11362319	11362820	.	0	.
chr8	119098231	119098732	.	0	.
chr2	174797570	174798071	.	0	.
chr5	123397758	123398259	.	0	.
chr4	46087777	46088278	.	0	.
chr10	83294181	83294682	.	0	.
chr4	107535760	107536261	.	0	.
chr2	70118477	70118978	.	0	.
chr3	37935311	37935812	.	0	.
chr1	134516491	134516992	.	0	.
chr14	78935592	78936093	.	0	.
chr8	125411454	125411955	.	0	.
chr18	80637088	80637589	.	0	.
chr5	64168909	64169410	.	0	.
chr5	53347358	53347859	.	0	.
chr2	172911658	172912159	.	0	.
chr1	192735774	192736275	.	0	.
chr2	173459089	173459590	.	0	.
chr14	12027073	12027574	.	0	.
chr3	59121049	59121550	.	0	.
chr5	114370173	114370674	.	0	.
chr6	17317538	17318039	.	0	.
chr3	52073900	52074401	.	0	.
chr9	111739836	111740337	.	0	.
chr1	157101076	157101577	.	0	.
chr14	55189237	55189738	.	0	.
chr5	113921286	113921787	.	0	.
chr9	47406958	47407459	.	0	.
chr4	154247990	154248491	.	0	.
chr16	32524072	32524573	.	0	.
chr9	106270497	106270998	.	0	.
chr3	89671462	89671963	.	0	.
chr15	85600848	85601349	.	0	.
chr9	65106728	65107229	.	0	.
chr1	135631463	135631964	.	0	.
chr16	30567254	30567755	.	0	.
chr13	95959935	95960436	.	0	.
chr8	13220530	13221031	.	0	.
chr4	100395440	100395941	.	0	.
chr2	174049471	174049972	.	0	.
chr6	53973500	53974001	.	0	.
chr2	35591364	35591865	.	0	.
chr9	120805843	120806344	.	0	.
chr5	113808196	113808697	.	0	.
chr2	170033074	170033575	.	0	.
chr7	81124765	81125266	.	0	.
chr3	51197450	51197951	.	0	.
chr7	39441210	39441711	.	0	.
chr1	153989213	153989714	.	0	.
chr2	11679162	11679663	.	0	.
chr2	169297782	169298283	.	0	.
chr6	29145676	29146177	.	0	.
chr10	41598149	41598650	.	0	.
chr9	120813613	120814114	.	0	.
chr3	120065066	120065567	.	0	.
chr12	25189665	25190166	.	0	.
chr7	137301414	137301915	.	0	.
chr5	137103347	137103848	.	0	.
chr1	90908979	90909480	.	0	.
chr12	109113138	109113639	.	0	.
chr11	76332248	76332749	.	0	.
chr4	104455092	104455593	.	0	.
chr7	74391435	74391936	.	0	.
chr4	137865482	137865983	.	0	.
chr11	67992642	67993143	.	0	.
chr3	108878924	108879425	.	0	.
chr4	150598584	150599085	.	0	.
chr8	121977608	121978109	.	0	.
chr5	101784166	101784667	.	0	.
chr10	78104405	78104906	.	0	.
chr19	45580069	45580570	.	0	.
chr15	38328324	38328825	.	0	.
chr7	144409833	144410334	.	0	.
chr8	125260769	125261270	.	0	.
chr6	91546078	91546579	.	0	.
chr11	113806963	113807464	.	0	.
chr5	116006231	116006732	.	0	.
chr17	79702464	79702965	.	0	.
chr9	87136244	87136745	.	0	.
chr1	153071460	153071961	.	0	.
chr3	108382489	108382990	.	0	.
chr10	87787457	87787958	.	0	.
chr1	59434049	59434550	.	0	.
chr1	72598346	72598847	.	0	.
chr3	37649237	37649738	.	0	.
chr5	143690870	143691371	.	0	.
chr7	118777314	118777815	.	0	.
chr8	77797910	77798411	.	0	.
chr11	32228417	32228918	.	0	.
chr2	131508486	131508987	.	0	.
chr11	89024265	89024766	.	0	.
chr6	108570276	108570777	.	0	.
chr5	24620025	24620526	.	0	.
chr6	29117325	29117826	.	0	.
chr4	111485129	111485630	.	0	.
chr11	16831953	16832454	.	0	.
chr11	114715473	114715974	.	0	.
chr1	16177465	16177966	.	0	.
chr13	8388877	8389378	.	0	.
chr8	125959458	125959959	.	0	.
chr4	128638558	128639059	.	0	.
chr11	113435150	113435651	.	0	.
chr2	37767156	37767657	.	0	.
chr12	113027496	113027997	.	0	.
chr8	125369733	125370234	.	0	.
chr3	90624302	90624803	.	0	.
chr11	83449440	83449941	.	0	.
chr2	27078296	27078797	.	0	.
chr7	66325336	66325837	.	0	.
chr10	42962078	42962579	.	0	.
chr4	126838743	126839244	.	0	.
chr5	107195732	107196233	.	0	.
chr17	50438770	50439271	.	0	.
chr11	76290293	76290794	.	0	.
chr6	97857620	97858121	.	0	.
chr7	122575427	122575928	.	0	.
chr5	35320632	35321133	.	0	.
chr12	104263412	104263913	.	0	.
chr8	123716516	123717017	.	0	.
chr12	83560130	83560631	.	0	.
chr2	92491819	92492320	.	0	.
chr4	144404316	144404817	.	0	.
chr5	112535899	112536400	.	0	.
chr9	119085077	119085578	.	0	.
chr8	92972986	92973487	.	0	.
chr10	5309901	5310402	.	0	.
chr8	120162300	120162801	.	0	.
chr2	156625208	156625709	.	0	.
chr3	89561867	89562368	.	0	.
chr7	139673707	139674208	.	0	.
chr2	152115102	152115603	.	0	.
chr11	4046496	4046997	.	0	.
chr16	31061174	31061675	.	0	.
chr2	27087482	27087983	.	0	.
chr12	83352561	83353062	.	0	.
chr11	32224752	32225253	.	0	.
chr2	152180354	152180855	.	0	.
chr7	109584444	109584945	.	0	.
chr11	43618267	43618768	.	0	.
chr19	53181358	53181859	.	0	.
chr9	118972322	118972823	.	0	.
chr5	34521143	34521644	.	0	.
chr17	25404508	25405009	.	0	.
chr5	75596125	75596626	.	0	.
chr14	120532263	120532764	.	0	.
chr1	87786773	87787274	.	0	.
chr12	109114172	109114673	.	0	.
chr9	114964007	114964508	.	0	.
chr18	38795953	38796454	.	0	.
chr6	143840884	143841385	.	0	.
chr10	70520764	70521265	.	0	.
chr9	32744261	32744762	.	0	.
chr7	130041350	130041851	.	0	.
chr4	107130598	107131099	.	0	.
chr6	112210422	112210923	.	0	.
chr17	31384329	31384830	.	0	.
chr7	36720765	36721266	.	0	.
chr7	66047394	66047895	.	0	.
chr11	113008355	113008856	.	0	.
chr14	27066273	27066774	.	0	.
chr1	90885757	90886258	.	0	.
chr13	54202371	54202872	.	0	.
chr12	105560927	105561428	.	0	.
chr8	115357874	115358375	.	0	.
chr19	8896999	8897500	.	0	.
chr4	126275690	126276191	.	0	.
chr1	184787533	184788034	.	0	.
chr4	139490600	139491101	.	0	.
chr11	109845858	109846359	.	0	.
chr6	91658149	91658650	.	0	.
chr8	120743456	120743957	.	0	.
chr18	60668328	60668829	.	0	.
chr1	82990360	82990861	.	0	.
chr7	118300644	118301145	.	0	.
chr4	137773982	137774483	.	0	.
chr11	31386436	31386937	.	0	.
chr12	103673119	103673620	.	0	.
chr4	101182651	101183152	.	0	.
chr6	135241201	135241702	.	0	.
chr17	84179922	84180423	.	0	.
chr8	31121261	31121762	.	0	.
chr8	45876639	45877140	.	0	.
chr5	140578762	140579263	.	0	.
chr1	53978311	53978812	.	0	.
chr13	53237364	53237865	.	0	.
chr3	30999943	31000444	.	0	.
chr11	62193043	62193544	.	0	.
chr11	83446751	83447252	.	0	.
chr6	59185230	59185731	.	0	.
chr5	29842673	29843174	.	0	.
chr9	121008236	121008737	.	0	.
chr16	93717167	93717668	.	0	.
chr8	11404573	11405074	.	0	.
chr19	53838729	53839230	.	0	.
chr10	117000953	117001454	.	0	.
chr17	47881381	47881882	.	0	.
chr11	114699494	114699995	.	0	.
chr5	115362767	115363268	.	0	.
chr7	143788802	143789303	.	0	.
chr11	35142637	35143138	.	0	.
chr9	98018618	98019119	.	0	.
chr4	101437047	101437548	.	0	.
chr8	117310941	117311442	.	0	.
chr12	110994231	110994732	.	0	.
chr6	92803162	92803663	.	0	.
chr2	26061366	26061867	.	0	.
chr3	75696629	75697130	.	0	.
chr13	98667062	98667563	.	0	.
chr7	36177967	36178468	.	0	.
chr10	77217245	77217746	.	0	.
chr15	97344824	97345325	.	0	.
chr5	128677908	128678409	.	0	.
chr6	114861523	114862024	.	0	.
chr2	165397173	165397674	.	0	.
chr16	29845438	29845939	.	0	.
chr1	167736921	167737422	.	0	.
chr7	110808956	110809457	.	0	.
chr3	27519370	27519871	.	0	.
chr7	127685297	127685798	.	0	.
chr6	131374944	131375445	.	0	.
chr8	121092017	121092518	.	0	.
chr18	62705107	62705608	.	0	.
chr15	78868394	78868895	.	0	.
chr8	126825815	126826316	.	0	.
chr12	105517626	105518127	.	0	.
chr13	18858088	18858589	.	0	.
chr5	32162379	32162880	.	0	.
chr11	117316677	117317178	.	0	.
chr5	92370906	92371407	.	0	.
chr4	57115133	57115634	.	0	.
chr18	65697482	65697983	.	0	.
chr13	101596967	101597468	.	0	.
chr2	169940779	169941280	.	0	.
chr8	122157718	122158219	.	0	.
chr12	79732648	79733149	.	0	.
chr15	84360654	84361155	.	0	.
chr11	117247492	117247993	.	0	.
chr2	92934232	92934733	.	0	.
chr6	140058920	140059421	.	0	.
chr1	75344199	75344700	.	0	.
chr4	150778681	150779182	.	0	.
chr15	79202801	79203302	.	0	.
chr10	61325902	61326403	.	0	.
chr4	151515592	151516093	.	0	.
chr2	168385080	168385581	.	0	.
chr5	136144506	136145007	.	0	.
chr8	125584089	125584590	.	0	.
chr8	109232144	109232645	.	0	.
chr16	21246494	21246995	.	0	.
chr5	102003207	102003708	.	0	.
chr3	98101454	98101955	.	0	.
chr15	51628500	51629001	.	0	.
chr4	127234813	127235314	.	0	.
chr2	165613660	165614161	.	0	.
chr2	104261227	104261728	.	0	.
chr9	107323516	107324017	.	0	.
chr11	103958406	103958907	.	0	.
chr5	104149237	104149738	.	0	.
chr6	118076205	118076706	.	0	.
chr14	77580685	77581186	.	0	.
chr4	104812098	104812599	.	0	.
chr6	135526682	135527183	.	0	.
chr4	8750717	8751218	.	0	.
chr8	10943315	10943816	.	0	.
chr16	92448731	92449232	.	0	.
chr13	52060342	52060843	.	0	.
chr6	71970395	71970896	.	0	.
chr11	53904050	53904551	.	0	.
chr2	18635029	18635530	.	0	.
chr7	45616270	45616771	.	0	.
chr5	113806208	113806709	.	0	.
chr19	41705382	41705883	.	0	.
chr7	96523662	96524163	.	0	.
chr1	132127531	132128032	.	0	.
chr1	159922954	159923455	.	0	.
chr14	70963652	70964153	.	0	.
chr18	65737621	65738122	.	0	.
chr8	64880790	64881291	.	0	.
chr2	128746778	128747279	.	0	.
chr12	8817853	8818354	.	0	.
chr2	75158508	75159009	.	0	.
chr13	107054588	107055089	.	0	.
chr11	116312366	116312867	.	0	.
chr2	38718560	38719061	.	0	.
chr13	48562307	48562808	.	0	.
chr11	68451126	68451627	.	0	.
chr1	152640533	152641034	.	0	.
chr17	25684491	25684992	.	0	.
chr13	37476220	37476721	.	0	.
chr18	38283608	38284109	.	0	.
chr7	116134865	116135366	.	0	.
chr10	77116582	77117083	.	0	.
chr14	54233210	54233711	.	0	.
chr1	88140999	88141500	.	0	.
chr5	32161847	32162348	.	0	.
chr13	43684631	43685132	.	0	.
chr12	100002963	100003464	.	0	.
chr2	167127335	167127836	.	0	.
chr17	83082281	83082782	.	0	.
chr2	172861510	172862011	.	0	.
chr18	38602626	38603127	.	0	.
chr17	6742520	6743021	.	0	.
chr3	87724429	87724930	.	0	.
chr2	161795130	161795631	.	0	.
chr4	46086699	46087200	.	0	.
chr11	101877820	101878321	.	0	.
chr7	117462547	117463048	.	0	.
chr1	60916453	60916954	.	0	.
chr15	25539347	25539848	.	0	.
chr11	52292142	52292643	.	0	.
chr17	72925878	72926379	.	0	.
chr12	29229267	29229768	.	0	.
chr18	64981829	64982330	.	0	.
chr2	173335791	173336292	.	0	.
chr1	39417797	39418298	.	0	.
chr6	86028446	86028947	.	0	.
chr11	106967581	106968082	.	0	.
chr5	115212864	115213365	.	0	.
chr9	77838560	77839061	.	0	.
chr11	119023948	119024449	.	0	.
chr2	125740191	125740692	.	0	.
chr1	136455731	136456232	.	0	.
chr14	79034394	79034895	.	0	.
chr11	67379985	67380486	.	0	.
chr7	142552788	142553289	.	0	.
chr9	120917895	120918396	.	0	.
chr7	135860771	135861272	.	0	.
chr10	86368696	86369197	.	0	.
chr15	84689145	84689646	.	0	.
chr2	91308633	91309134	.	0	.
chr14	74646104	74646605	.	0	.
chr16	17984089	17984590	.	0	.
chr5	64666187	64666688	.	0	.
chr4	57494053	57494554	.	0	.
chr15	56766270	56766771	.	0	.
chr2	52694530	52695031	.	0	.
chr3	101831503	101832004	.	0	.
chr8	125067068	125067569	.	0	.
chr7	126459132	126459633	.	0	.
chr15	81772442	81772943	.	0	.
chr9	35340708	35341209	.	0	.
chr11	88441683	88442184	.	0	.
chr11	106659925	106660426	.	0	.
chr6	86264968	86265469	.	0	.
chr11	116075235	116075736	.	0	.
chr8	91648865	91649366	.	0	.
chr1	89420630	89421131	.	0	.
chr18	38284281	38284782	.	0	.
chr2	93902933	93903434	.	0	.
chr16	24492518	24493019	.	0	.
chr15	101260441	101260942	.	0	.
chr5	122731938	122732439	.	0	.
chr3	63570526	63571027	.	0	.
chr14	20650945	20651446	.	0	.
chr1	134229744	134230245	.	0	.
chr15	95726441	95726942	.	0	.
chr6	94640256	94640757	.	0	.
chr5	73191703	73192204	.	0	.
chr19	42922575	42923076	.	0	.
chr5	39425969	39426470	.	0	.
chr1	73793886	73794387	.	0	.
chr1	58291824	58292325	.	0	.
[truncated: 10,876 more rows]

## Sheet: Stroma.DAR
chr12	109417637	109418138	.	0	.
chr7	19304863	19305364	.	0	.
chr4	120725935	120726436	.	0	.
chr7	142481849	142482350	.	0	.
chr7	19304278	19304779	.	0	.
chr14	24793579	24794080	.	0	.
chr7	19301943	19302444	.	0	.
chr12	85476175	85476676	.	0	.
chr4	155233826	155234327	.	0	.
chr11	59336261	59336762	.	0	.
chr7	19303749	19304250	.	0	.
chr2	174008277	174008778	.	0	.
chr1	131259897	131260398	.	0	.
chr17	27422626	27423127	.	0	.
chr6	115499519	115500020	.	0	.
chr2	103927491	103927992	.	0	.
chr4	120725377	120725878	.	0	.
chr18	34863311	34863812	.	0	.
chr9	56851729	56852230	.	0	.
chr5	142899223	142899724	.	0	.
chr4	139175424	139175925	.	0	.
chr5	112002023	112002524	.	0	.
chr8	79562219	79562720	.	0	.
chr9	35523576	35524077	.	0	.
chr8	70702677	70703178	.	0	.
chr7	19303082	19303583	.	0	.
chr9	58299212	58299713	.	0	.
chr7	142482385	142482886	.	0	.
chr4	63226778	63227279	.	0	.
chr1	164798318	164798819	.	0	.
chr10	81416607	81417108	.	0	.
chr7	34986741	34987242	.	0	.
chr8	84742548	84743049	.	0	.
chr9	47280153	47280654	.	0	.
chr6	145998488	145998989	.	0	.
chr8	90862017	90862518	.	0	.
chr1	156781053	156781554	.	0	.
chr11	88540041	88540542	.	0	.
chr8	118452309	118452810	.	0	.
chr2	172468383	172468884	.	0	.
chr7	19302523	19303024	.	0	.
chr14	54926524	54927025	.	0	.
chr6	29436515	29437016	.	0	.
chr11	52332786	52333287	.	0	.
chr7	19307095	19307596	.	0	.
chr15	103315781	103316282	.	0	.
chr10	79988309	79988810	.	0	.
chr7	19286738	19287239	.	0	.
chr11	100962347	100962848	.	0	.
chr2	174008851	174009352	.	0	.
chr5	115666160	115666661	.	0	.
chr12	82998486	82998987	.	0	.
chr18	43493862	43494363	.	0	.
chr8	90869951	90870452	.	0	.
chr18	63356378	63356879	.	0	.
chr4	9440992	9441493	.	0	.
chr12	109417066	109417567	.	0	.
chr8	70704730	70705231	.	0	.
chr11	85759957	85760458	.	0	.
chr15	25886372	25886873	.	0	.
chr3	123159540	123160041	.	0	.
chr12	33019078	33019579	.	0	.
chr3	79808719	79809220	.	0	.
chr1	135536225	135536726	.	0	.
chr19	57078080	57078581	.	0	.
chr8	88571404	88571905	.	0	.
chr11	118156592	118157093	.	0	.
chr15	64533051	64533552	.	0	.
chr7	19292985	19293486	.	0	.
chr4	120726541	120727042	.	0	.
chr8	70703279	70703780	.	0	.
chr5	35609352	35609853	.	0	.
chr11	45265413	45265914	.	0	.
chr5	142902404	142902905	.	0	.
chr8	70703977	70704478	.	0	.
chr18	78237293	78237794	.	0	.
chr14	28057746	28058247	.	0	.
chr5	36294697	36295198	.	0	.
chr5	111398383	111398884	.	0	.
chr7	45641400	45641901	.	0	.
chr6	137838875	137839376	.	0	.
chr7	118554345	118554846	.	0	.
chr15	98391591	98392092	.	0	.
chr11	117889849	117890350	.	0	.
chr7	143389090	143389591	.	0	.
chr7	112453834	112454335	.	0	.
chr17	84148749	84149250	.	0	.
chr11	8799320	8799821	.	0	.
chr2	132030068	132030569	.	0	.
chr7	130671167	130671668	.	0	.
chr7	19306255	19306756	.	0	.
chr14	31134019	31134520	.	0	.
chr12	108403847	108404348	.	0	.
chr17	83938765	83939266	.	0	.
chr5	142900473	142900974	.	0	.
chr1	120248121	120248622	.	0	.
chr3	94930551	94931052	.	0	.
chr12	101777798	101778299	.	0	.
chr14	120960946	120961447	.	0	.
chr12	112660689	112661190	.	0	.
chr12	33020017	33020518	.	0	.
chr2	33785527	33786028	.	0	.
chr11	75141865	75142366	.	0	.
chr8	70702160	70702661	.	0	.
chr1	185666698	185667199	.	0	.
chr7	19297482	19297983	.	0	.
chr5	129189391	129189892	.	0	.
chr12	4188217	4188718	.	0	.
chr15	86376793	86377294	.	0	.
chr8	122804112	122804613	.	0	.
chr11	116470202	116470703	.	0	.
chr6	113393531	113394032	.	0	.
chr12	75352476	75352977	.	0	.
chr1	163574610	163575111	.	0	.
chr8	72324361	72324862	.	0	.
chr11	119988801	119989302	.	0	.
chr8	88570605	88571106	.	0	.
chr6	72711468	72711969	.	0	.
chr11	97289838	97290339	.	0	.
chr2	93242215	93242716	.	0	.
chr12	69474194	69474695	.	0	.
chr7	19305739	19306240	.	0	.
chr5	139964348	139964849	.	0	.
chr6	85302574	85303075	.	0	.
chr5	107110768	107111269	.	0	.
chr18	58872685	58873186	.	0	.
chr3	89962015	89962516	.	0	.
chr2	166729924	166730425	.	0	.
chr8	87804334	87804835	.	0	.
chr12	112894281	112894782	.	0	.
chr18	34864243	34864744	.	0	.
chr17	34684125	34684626	.	0	.
chr8	114451543	114452044	.	0	.
chr7	31008997	31009498	.	0	.
chr7	110790695	110791196	.	0	.
chr7	19299660	19300161	.	0	.
chr6	50986520	50987021	.	0	.
chr15	86508524	86509025	.	0	.
chr1	185969206	185969707	.	0	.
chr19	8988969	8989470	.	0	.
chr8	88545960	88546461	.	0	.
chr15	101273773	101274274	.	0	.
chr2	166094122	166094623	.	0	.
chr17	27547109	27547610	.	0	.
chr8	61638874	61639375	.	0	.
chr3	152689129	152689630	.	0	.
chr12	109540704	109541205	.	0	.
chr12	109897827	109898328	.	0	.
chr11	109541529	109542030	.	0	.
chr7	19294854	19295355	.	0	.
chr15	86377315	86377816	.	0	.
chr1	182527962	182528463	.	0	.
chr7	28374524	28375025	.	0	.
chr18	76087331	76087832	.	0	.
chr1	64409102	64409603	.	0	.
chr6	114892296	114892797	.	0	.
chr16	13233270	13233771	.	0	.
chr12	109548536	109549037	.	0	.
chr5	37768928	37769429	.	0	.
chr7	142285644	142286145	.	0	.
chr17	12780094	12780595	.	0	.
chr1	59394468	59394969	.	0	.
chr2	27813280	27813781	.	0	.
chr18	67396323	67396824	.	0	.
chr7	19294337	19294838	.	0	.
chr8	70408222	70408723	.	0	.
chr5	75121475	75121976	.	0	.
chr12	87044787	87045288	.	0	.
chr17	31873954	31874455	.	0	.
chr2	169925941	169926442	.	0	.
chr8	122398168	122398669	.	0	.
chr9	67877231	67877732	.	0	.
chr17	7577234	7577735	.	0	.
chr10	39227350	39227851	.	0	.
chr12	76618217	76618718	.	0	.
chr7	129675734	129676235	.	0	.
chr4	120745845	120746346	.	0	.
chr5	134872582	134873083	.	0	.
chr3	89214949	89215450	.	0	.
chr14	24794109	24794610	.	0	.
chr5	111121064	111121565	.	0	.
chr5	33234631	33235132	.	0	.
chr12	85477771	85478272	.	0	.
chr2	31374355	31374856	.	0	.
chr9	119999504	120000005	.	0	.
chr9	40809472	40809973	.	0	.
chr8	114499203	114499704	.	0	.
chr18	34867743	34868244	.	0	.
chr13	101305925	101306426	.	0	.
chr3	79808043	79808544	.	0	.
chr7	25280508	25281009	.	0	.
chr3	64039131	64039632	.	0	.
chr9	35402452	35402953	.	0	.
chr12	109402750	109403251	.	0	.
chr3	87982711	87983212	.	0	.
chr15	83666688	83667189	.	0	.
chr2	33814619	33815120	.	0	.
chr2	132030573	132031074	.	0	.
chr5	142901874	142902375	.	0	.
chr4	148384426	148384927	.	0	.
chr4	9440434	9440935	.	0	.
chr8	35622906	35623407	.	0	.
chr12	4509621	4510122	.	0	.
chr18	46867258	46867759	.	0	.
chr5	114284601	114285102	.	0	.
chr8	27097583	27098084	.	0	.
chr8	122705776	122706277	.	0	.
chr14	55824731	55825232	.	0	.
chr7	142286146	142286647	.	0	.
chr10	39261696	39262197	.	0	.
chr17	75293655	75294156	.	0	.
chr7	19288768	19289269	.	0	.
chr7	44861044	44861545	.	0	.
chr4	105848650	105849151	.	0	.
chr2	30870856	30871357	.	0	.
chr10	76730233	76730734	.	0	.
chr11	94933521	94934022	.	0	.
chr11	74866591	74867092	.	0	.
chr1	193317026	193317527	.	0	.
chr5	142899905	142900406	.	0	.
chr16	31276559	31277060	.	0	.
chr1	164770635	164771136	.	0	.
chr12	85479182	85479683	.	0	.
chr3	55571876	55572377	.	0	.
chr6	88388885	88389386	.	0	.
chr8	120465694	120466195	.	0	.
chr9	96971889	96972390	.	0	.
chr9	61324238	61324739	.	0	.
chr5	118143344	118143845	.	0	.
chr10	126930210	126930711	.	0	.
chr1	15976962	15977463	.	0	.
chr11	100969548	100970049	.	0	.
chr7	19285982	19286483	.	0	.
chr4	55645470	55645971	.	0	.
chr2	93175156	93175657	.	0	.
chr7	121549466	121549967	.	0	.
chr18	36109186	36109687	.	0	.
chr5	116208716	116209217	.	0	.
chr7	142484688	142485189	.	0	.
chr9	96972844	96973345	.	0	.
chr11	94409896	94410397	.	0	.
chr11	109143897	109144398	.	0	.
chr16	35000821	35001322	.	0	.
chr5	24262347	24262848	.	0	.
chr17	56814222	56814723	.	0	.
chr12	32884293	32884794	.	0	.
chr12	108445112	108445613	.	0	.
chr6	99845301	99845802	.	0	.
chr15	79377619	79378120	.	0	.
chr17	34507460	34507961	.	0	.
chr7	144662988	144663489	.	0	.
chr16	11636684	11637185	.	0	.
chr2	169925403	169925904	.	0	.
chr10	80348859	80349360	.	0	.
chr19	10296953	10297454	.	0	.
chr6	125379702	125380203	.	0	.
chr11	100516127	100516628	.	0	.
chr5	116425209	116425710	.	0	.
chr8	84212270	84212771	.	0	.
chr19	53107492	53107993	.	0	.
chr12	15749714	15750215	.	0	.
chr2	118539710	118540211	.	0	.
chr5	149614718	149615219	.	0	.
chr8	72325280	72325781	.	0	.
chr11	95365641	95366142	.	0	.
chr14	47915941	47916442	.	0	.
chr7	137073776	137074277	.	0	.
chr8	121468730	121469231	.	0	.
chr1	164796381	164796882	.	0	.
chr2	159566303	159566804	.	0	.
chr19	4220807	4221308	.	0	.
chr15	101852206	101852707	.	0	.
chr2	93319689	93320190	.	0	.
chr7	19300540	19301041	.	0	.
chr1	152687214	152687715	.	0	.
chr9	51462789	51463290	.	0	.
chr1	185836823	185837324	.	0	.
chr7	28373692	28374193	.	0	.
chr6	50749144	50749645	.	0	.
chr2	32549753	32550254	.	0	.
chr13	111235829	111236330	.	0	.
chr1	38390384	38390885	.	0	.
chr10	127189152	127189653	.	0	.
chr16	10861364	10861865	.	0	.
chr7	27596702	27597203	.	0	.
chr11	50547772	50548273	.	0	.
chr4	96719052	96719553	.	0	.
chr9	44637704	44638205	.	0	.
chr1	135744962	135745463	.	0	.
chr8	70707320	70707821	.	0	.
chr2	13583451	13583952	.	0	.
chr19	5058751	5059252	.	0	.
chr7	129790834	129791335	.	0	.
chr17	29229387	29229888	.	0	.
chr11	81860619	81861120	.	0	.
chr10	127274595	127275096	.	0	.
chr8	84211396	84211897	.	0	.
chr16	34413862	34414363	.	0	.
chr1	73955396	73955897	.	0	.
chr11	113849270	113849771	.	0	.
chr5	142896629	142897130	.	0	.
chr5	44686175	44686676	.	0	.
chr10	12878581	12879082	.	0	.
chr8	83617471	83617972	.	0	.
chr11	33013195	33013696	.	0	.
chr10	83945310	83945811	.	0	.
chr19	57106547	57107048	.	0	.
chr10	4159656	4160157	.	0	.
chr11	102595484	102595985	.	0	.
chr11	119989415	119989916	.	0	.
chr8	70715902	70716403	.	0	.
chr17	84074906	84075407	.	0	.
chr5	142898585	142899086	.	0	.
chr10	8972714	8973215	.	0	.
chr14	28058389	28058890	.	0	.
chr7	127814052	127814553	.	0	.
chr8	102783773	102784274	.	0	.
chr9	121555689	121556190	.	0	.
chr10	87593861	87594362	.	0	.
chr3	64038222	64038723	.	0	.
chr19	5954232	5954733	.	0	.
chr4	105859316	105859817	.	0	.
chr5	127370406	127370907	.	0	.
chr14	27200608	27201109	.	0	.
chr4	140747918	140748419	.	0	.
chr8	87064351	87064852	.	0	.
chr14	12189740	12190241	.	0	.
chr17	14420454	14420955	.	0	.
chr9	118676942	118677443	.	0	.
chr15	68204558	68205059	.	0	.
chr11	114486355	114486856	.	0	.
chr7	19288251	19288752	.	0	.
chr16	44625685	44626186	.	0	.
chr17	34656561	34657062	.	0	.
chr8	79518895	79519396	.	0	.
chr8	36904586	36905087	.	0	.
chr12	109585907	109586408	.	0	.
chr12	100406384	100406885	.	0	.
chr5	111631781	111632282	.	0	.
chr10	64040082	64040583	.	0	.
chr1	74084095	74084596	.	0	.
chr4	107121472	107121973	.	0	.
chr2	29443707	29444208	.	0	.
chr2	125530547	125531048	.	0	.
chr11	59364373	59364874	.	0	.
chr12	109572729	109573230	.	0	.
chr2	33813277	33813778	.	0	.
chr17	85949879	85950380	.	0	.
chr7	19296820	19297321	.	0	.
chr11	108936492	108936993	.	0	.
chr5	24689983	24690484	.	0	.
chr3	101078905	101079406	.	0	.
chr10	91229351	91229852	.	0	.
chr19	6464460	6464961	.	0	.
chr4	155238158	155238659	.	0	.
chr1	132377640	132378141	.	0	.
chr15	103316286	103316787	.	0	.
chr8	25535864	25536365	.	0	.
chr11	8706566	8707067	.	0	.
chr3	151891680	151892181	.	0	.
chr11	59346157	59346658	.	0	.
chr9	102650713	102651214	.	0	.
chr17	26647229	26647730	.	0	.
chr4	142251603	142252104	.	0	.
chr4	154209067	154209568	.	0	.
chr13	60099668	60100169	.	0	.
chr7	98939166	98939667	.	0	.
chr4	82530808	82531309	.	0	.
chr1	89849341	89849842	.	0	.
chr16	10973814	10974315	.	0	.
chr8	70708895	70709396	.	0	.
chr1	193090291	193090792	.	0	.
chr7	45180853	45181354	.	0	.
chr5	136721534	136722035	.	0	.
chr3	58401590	58402091	.	0	.
chr16	35123266	35123767	.	0	.
chr15	52967693	52968194	.	0	.
chr8	84213948	84214449	.	0	.
chr12	109568301	109568802	.	0	.
chr11	67523845	67524346	.	0	.
chr19	47458763	47459264	.	0	.
chr1	179458845	179459346	.	0	.
chr7	58626815	58627316	.	0	.
chr7	19283516	19284017	.	0	.
chr14	33317941	33318442	.	0	.
chr7	112535358	112535859	.	0	.
chr4	148512850	148513351	.	0	.
chr7	111600529	111601030	.	0	.
chr12	109411943	109412444	.	0	.
chr11	35694588	35695089	.	0	.
chr8	70708273	70708774	.	0	.
chr17	67866723	67867224	.	0	.
chr8	70705285	70705786	.	0	.
chr14	121247008	121247509	.	0	.
chr7	26783127	26783628	.	0	.
chr10	78321215	78321716	.	0	.
chr7	143388328	143388829	.	0	.
chr19	9104978	9105479	.	0	.
chr3	90604359	90604860	.	0	.
chr3	109005763	109006264	.	0	.
chr2	10788488	10788989	.	0	.
chr12	104851513	104852014	.	0	.
chr3	88616112	88616613	.	0	.
chr1	75365315	75365816	.	0	.
chr13	56344611	56345112	.	0	.
chr14	28043020	28043521	.	0	.
chr12	84532489	84532990	.	0	.
chr9	40808756	40809257	.	0	.
chr3	88512435	88512936	.	0	.
chr8	72664213	72664714	.	0	.
chr1	133834271	133834772	.	0	.
chr14	32016999	32017500	.	0	.
chr19	47458090	47458591	.	0	.
chr2	75468737	75469238	.	0	.
chr19	9011558	9012059	.	0	.
chr12	109418231	109418732	.	0	.
chr4	130560850	130561351	.	0	.
chr4	128652586	128653087	.	0	.
chr12	112318035	112318536	.	0	.
chr7	19083778	19084279	.	0	.
chr13	69429411	69429912	.	0	.
chr8	70717173	70717674	.	0	.
chr16	44616396	44616897	.	0	.
chr18	60814031	60814532	.	0	.
chr7	78965364	78965865	.	0	.
chr13	55482438	55482939	.	0	.
chr9	20814829	20815330	.	0	.
chr7	142487237	142487738	.	0	.
chr9	37076589	37077090	.	0	.
chr1	158310382	158310883	.	0	.
chr1	156780285	156780786	.	0	.
chr4	95048092	95048593	.	0	.
chr3	101066074	101066575	.	0	.
chr8	84722654	84723155	.	0	.
chr5	149613444	149613945	.	0	.
chr2	33273131	33273632	.	0	.
chr15	62257899	62258400	.	0	.
chr6	117124963	117125464	.	0	.
chr18	35894638	35895139	.	0	.
chr3	142941471	142941972	.	0	.
chr15	100777293	100777794	.	0	.
chr9	37120718	37121219	.	0	.
chr2	29216303	29216804	.	0	.
chr7	110781346	110781847	.	0	.
chr4	139104375	139104876	.	0	.
chr7	19298048	19298549	.	0	.
chr10	60794330	60794831	.	0	.
chr11	95633482	95633983	.	0	.
chr2	93246929	93247430	.	0	.
chr5	104062217	104062718	.	0	.
chr3	121433830	121434331	.	0	.
chr17	12781056	12781557	.	0	.
chr8	84216033	84216534	.	0	.
chr2	165248846	165249347	.	0	.
chr12	86775524	86776025	.	0	.
chr7	144663539	144664040	.	0	.
chr6	40123250	40123751	.	0	.
chr14	32715042	32715543	.	0	.
chr1	150873149	150873650	.	0	.
chr11	88564418	88564919	.	0	.
chr2	172467848	172468349	.	0	.
chr6	87112082	87112583	.	0	.
chr4	111686290	111686791	.	0	.
chr3	88480387	88480888	.	0	.
chr6	91646075	91646576	.	0	.
chr9	84032731	84033232	.	0	.
chr11	113393657	113394158	.	0	.
chr5	38553927	38554428	.	0	.
chr12	5219817	5220318	.	0	.
chr9	40808249	40808750	.	0	.
chr19	9016528	9017029	.	0	.
chr6	115500056	115500557	.	0	.
chr8	70714487	70714988	.	0	.
chr1	135755142	135755643	.	0	.
chr2	4452877	4453378	.	0	.
chr8	18648408	18648909	.	0	.
chr12	112595496	112595997	.	0	.
chr8	88012436	88012937	.	0	.
chr10	39639059	39639560	.	0	.
chr10	19460149	19460650	.	0	.
chr12	106839578	106840079	.	0	.
chr4	148513375	148513876	.	0	.
chr4	41480224	41480725	.	0	.
chr5	129065898	129066399	.	0	.
chr8	105475141	105475642	.	0	.
chr2	13578455	13578956	.	0	.
chr2	92011634	92012135	.	0	.
chr5	114544945	114545446	.	0	.
chr1	90247830	90248331	.	0	.
chr6	50802775	50803276	.	0	.
chr7	98801084	98801585	.	0	.
chr12	86646739	86647240	.	0	.
chr12	109566332	109566833	.	0	.
chr12	109583763	109584264	.	0	.
chr5	134680343	134680844	.	0	.
chr13	119713546	119714047	.	0	.
chr12	109580130	109580631	.	0	.
chr11	83455666	83456167	.	0	.
chr17	74424466	74424967	.	0	.
chr19	8988385	8988886	.	0	.
chr14	25636335	25636836	.	0	.
chr11	100789744	100790245	.	0	.
chr1	82544511	82545012	.	0	.
chr4	134986136	134986637	.	0	.
chr17	26792014	26792515	.	0	.
chr4	58032507	58033008	.	0	.
chr17	47527457	47527958	.	0	.
chr8	116248316	116248817	.	0	.
chr15	92839471	92839972	.	0	.
chr4	142095484	142095985	.	0	.
chr19	9008629	9009130	.	0	.
chr11	68731008	68731509	.	0	.
chr11	59732618	59733119	.	0	.
chr12	112670939	112671440	.	0	.
chr5	77181419	77181920	.	0	.
chr10	120073895	120074396	.	0	.
chr7	98142195	98142696	.	0	.
chr8	90870495	90870996	.	0	.
chr7	49941952	49942453	.	0	.
chr12	70394985	70395486	.	0	.
chr5	142074756	142075257	.	0	.
chr12	9583182	9583683	.	0	.
chr3	88482270	88482771	.	0	.
chr2	33786206	33786707	.	0	.
chr6	93445480	93445981	.	0	.
chr8	120304010	120304511	.	0	.
chr16	87834282	87834783	.	0	.
chr1	15913450	15913951	.	0	.
chr1	131077440	131077941	.	0	.
chr17	47526824	47527325	.	0	.
chr5	111805096	111805597	.	0	.
chr1	74084700	74085201	.	0	.
chr2	57916329	57916830	.	0	.
chr11	99993677	99994178	.	0	.
chr10	39227904	39228405	.	0	.
chr3	52376695	52377196	.	0	.
chr8	70705792	70706293	.	0	.
chr8	35300930	35301431	.	0	.
chr18	44633898	44634399	.	0	.
chr12	108444466	108444967	.	0	.
chr8	104105708	104106209	.	0	.
chr5	139558413	139558914	.	0	.
chr4	155144735	155145236	.	0	.
chr16	44665603	44666104	.	0	.
chr9	67549821	67550322	.	0	.
chr1	13530792	13531293	.	0	.
chr8	70713310	70713811	.	0	.
chr15	83666173	83666674	.	0	.
chr8	120425006	120425507	.	0	.
chr7	142483066	142483567	.	0	.
chr1	90497488	90497989	.	0	.
chr2	59351639	59352140	.	0	.
chr18	4204745	4205246	.	0	.
chr6	115958998	115959499	.	0	.
chr7	132258719	132259220	.	0	.
chr1	73958123	73958624	.	0	.
chr17	12739519	12740020	.	0	.
chr12	112182477	112182978	.	0	.
chr19	5496904	5497405	.	0	.
chr8	83619867	83620368	.	0	.
chr17	71995462	71995963	.	0	.
chr2	60796777	60797278	.	0	.
chr10	78388420	78388921	.	0	.
chr4	134525782	134526283	.	0	.
chr19	5497525	5498026	.	0	.
chr1	185822268	185822769	.	0	.
chr11	59309013	59309514	.	0	.
chr17	30225324	30225825	.	0	.
chr19	9001584	9002085	.	0	.
chr7	145300647	145301148	.	0	.
chr14	65098754	65099255	.	0	.
chr8	11628322	11628823	.	0	.
chr8	70716550	70717051	.	0	.
chr4	72379004	72379505	.	0	.
chr17	75292533	75293034	.	0	.
chr12	109590576	109591077	.	0	.
chr4	125922422	125922923	.	0	.
chr2	30836579	30837080	.	0	.
chr10	76653228	76653729	.	0	.
chr11	105334125	105334626	.	0	.
chr9	35522693	35523194	.	0	.
chr12	109587441	109587942	.	0	.
chr9	80340662	80341163	.	0	.
chr6	72473528	72474029	.	0	.
chr15	73610746	73611247	.	0	.
chr8	34188916	34189417	.	0	.
chr2	29407703	29408204	.	0	.
chr12	109839139	109839640	.	0	.
chr7	110989462	110989963	.	0	.
chr6	88388351	88388852	.	0	.
chr5	149612661	149613162	.	0	.
chr2	26280961	26281462	.	0	.
chr8	114679831	114680332	.	0	.
chr14	11875158	11875659	.	0	.
chr19	45131924	45132425	.	0	.
chr2	25220147	25220648	.	0	.
chr2	102916559	102917060	.	0	.
chr2	168465933	168466434	.	0	.
chr18	68028180	68028681	.	0	.
chr1	89080816	89081317	.	0	.
chr9	58091840	58092341	.	0	.
chr14	31988568	31989069	.	0	.
chr15	86112562	86113063	.	0	.
chr8	83666560	83667061	.	0	.
chr2	105146718	105147219	.	0	.
chr11	114625892	114626393	.	0	.
chr11	114173172	114173673	.	0	.
chr15	95827377	95827878	.	0	.
chr3	138242012	138242513	.	0	.
chr14	63296132	63296633	.	0	.
chr10	4028782	4029283	.	0	.
chr2	152375477	152375978	.	0	.
chr8	120724880	120725381	.	0	.
chr13	99737263	99737764	.	0	.
chr4	105265651	105266152	.	0	.
chr3	88624915	88625416	.	0	.
chr7	19291849	19292350	.	0	.
chr17	83938112	83938613	.	0	.
chr8	35276396	35276897	.	0	.
chr1	86955670	86956171	.	0	.
chr12	21097856	21098357	.	0	.
chr3	88479033	88479534	.	0	.
chr2	102882098	102882599	.	0	.
chr17	27212152	27212653	.	0	.
chr6	95621807	95622308	.	0	.
chr11	100524322	100524823	.	0	.
chr19	9012340	9012841	.	0	.
chr6	42367433	42367934	.	0	.
chr8	108845905	108846406	.	0	.
chr2	59752788	59753289	.	0	.
chr8	70709520	70710021	.	0	.
chr10	3920444	3920945	.	0	.
chr12	15562773	15563274	.	0	.
chr12	4115745	4116246	.	0	.
chr13	56168363	56168864	.	0	.
chr14	27173130	27173631	.	0	.
chr7	95789378	95789879	.	0	.
chr15	101274338	101274839	.	0	.
chr3	88468290	88468791	.	0	.
chr8	70715163	70715664	.	0	.
chr19	23401682	23402183	.	0	.
chr6	90781739	90782240	.	0	.
chr2	159607143	159607644	.	0	.
chrX	99560605	99561106	.	0	.
chr10	22838935	22839436	.	0	.
chr10	92081226	92081727	.	0	.
chr8	84210890	84211391	.	0	.
chr5	138272251	138272752	.	0	.
chr15	99819856	99820357	.	0	.
chr8	121821437	121821938	.	0	.
chr10	85164869	85165370	.	0	.
chr4	136943853	136944354	.	0	.
chr8	124171793	124172294	.	0	.
chr10	83926945	83927446	.	0	.
chr11	117618400	117618901	.	0	.
chr8	120251305	120251806	.	0	.
chr4	105205486	105205987	.	0	.
chr9	102842516	102843017	.	0	.
chr13	53230375	53230876	.	0	.
chr17	24524584	24525085	.	0	.
chr7	35920225	35920726	.	0	.
chr12	34155644	34156145	.	0	.
chr4	106017918	106018419	.	0	.
chr4	40737215	40737716	.	0	.
chr4	137500681	137501182	.	0	.
chr17	29818183	29818684	.	0	.
chr3	88470636	88471137	.	0	.
chr3	88489505	88490006	.	0	.
chr5	136704327	136704828	.	0	.
chr7	16970614	16971115	.	0	.
chr11	102594955	102595456	.	0	.
chr14	70086011	70086512	.	0	.
chr2	144238342	144238843	.	0	.
chr13	53255392	53255893	.	0	.
chr3	55354051	55354552	.	0	.
chr1	186101957	186102458	.	0	.
chr12	109569277	109569778	.	0	.
chr9	60920527	60921028	.	0	.
chrX	150955405	150955906	.	0	.
chr3	100242176	100242677	.	0	.
chr13	104964225	104964726	.	0	.
chr4	63685868	63686369	.	0	.
chr11	75263387	75263888	.	0	.
chr7	84337612	84338113	.	0	.
chr12	88784543	88785044	.	0	.
chr13	60434315	60434816	.	0	.
chr15	99430945	99431446	.	0	.
chr3	83222009	83222510	.	0	.
chr15	83848470	83848971	.	0	.
chr12	109567594	109568095	.	0	.
chr15	10540222	10540723	.	0	.
chr18	78214925	78215426	.	0	.
chr16	50602045	50602546	.	0	.
chr8	123649336	123649837	.	0	.
chr6	30112623	30113124	.	0	.
chr8	36494825	36495326	.	0	.
chr9	60035815	60036316	.	0	.
chr1	135535234	135535735	.	0	.
chr8	70712795	70713296	.	0	.
chr17	27423134	27423635	.	0	.
chr4	125629486	125629987	.	0	.
chrX	169925570	169926071	.	0	.
chr6	91533726	91534227	.	0	.
chr7	142486609	142487110	.	0	.
chr19	9009514	9010015	.	0	.
chr15	83667406	83667907	.	0	.
chr8	14603854	14604355	.	0	.
chr1	91816635	91817136	.	0	.
chr8	70706309	70706810	.	0	.
chr4	134979255	134979756	.	0	.
chr3	8772940	8773441	.	0	.
chr2	93321815	93322316	.	0	.
chr14	77564053	77564554	.	0	.
chr7	130215345	130215846	.	0	.
chr12	109578940	109579441	.	0	.
chr7	3308683	3309184	.	0	.
chr2	125606410	125606911	.	0	.
chr9	40806688	40807189	.	0	.
chr12	109563513	109564014	.	0	.
chr4	136650058	136650559	.	0	.
chr13	56344079	56344580	.	0	.
chr13	68601131	68601632	.	0	.
chr1	153307606	153308107	.	0	.
chr4	44320332	44320833	.	0	.
chr2	24521254	24521755	.	0	.
chr10	78312114	78312615	.	0	.
chr6	90761228	90761729	.	0	.
chr7	90236180	90236681	.	0	.
chr8	72323021	72323522	.	0	.
chr5	140535845	140536346	.	0	.
chr2	168598256	168598757	.	0	.
chr4	56643937	56644438	.	0	.
chr16	86604073	86604574	.	0	.
chr17	45766377	45766878	.	0	.
chr10	39638214	39638715	.	0	.
chr17	14450186	14450687	.	0	.
chr1	131259189	131259690	.	0	.
chr16	91557661	91558162	.	0	.
chr7	3303165	3303666	.	0	.
chr5	142903001	142903502	.	0	.
chr12	109571931	109572432	.	0	.
chr5	129189999	129190500	.	0	.
chr14	70089557	70090058	.	0	.
chr15	38174156	38174657	.	0	.
chr17	64612421	64612922	.	0	.
chr1	186515102	186515603	.	0	.
chr11	114512742	114513243	.	0	.
chr11	106013709	106014210	.	0	.
chr11	66046621	66047122	.	0	.
chr1	92814401	92814902	.	0	.
chr2	168587050	168587551	.	0	.
chr3	108759876	108760377	.	0	.
chr2	29216933	29217434	.	0	.
chr4	131059505	131060006	.	0	.
chr7	91429644	91430145	.	0	.
chr2	103118235	103118736	.	0	.
chr5	24690689	24691190	.	0	.
chr10	60405723	60406224	.	0	.
chr12	86612230	86612731	.	0	.
chr1	156970615	156971116	.	0	.
chr9	47865549	47866050	.	0	.
chr8	10153653	10154154	.	0	.
chr17	27421863	27422364	.	0	.
chr1	135750528	135751029	.	0	.
chr12	101778401	101778902	.	0	.
chr2	166730485	166730986	.	0	.
chr2	27671749	27672250	.	0	.
chr4	94752446	94752947	.	0	.
chr5	149615446	149615947	.	0	.
chr14	25278801	25279302	.	0	.
chr14	25735267	25735768	.	0	.
chr4	65269893	65270394	.	0	.
chr4	152190053	152190554	.	0	.
chr1	135341950	135342451	.	0	.
chr1	179457491	179457992	.	0	.
chr6	50726065	50726566	.	0	.
chr17	78521326	78521827	.	0	.
chr10	4160205	4160706	.	0	.
chr2	28131797	28132298	.	0	.
chr11	114488230	114488731	.	0	.
chr6	42364545	42365046	.	0	.
chr19	53051192	53051693	.	0	.
chr5	74632689	74633190	.	0	.
chr5	149618013	149618514	.	0	.
chr8	35774956	35775457	.	0	.
chr1	169086051	169086552	.	0	.
chr11	69937247	69937748	.	0	.
chr17	28008409	28008910	.	0	.
chr12	33020553	33021054	.	0	.
chr19	9006674	9007175	.	0	.
chr12	109565736	109566237	.	0	.
chr5	36295243	36295744	.	0	.
chr12	85478627	85479128	.	0	.
chr8	108897277	108897778	.	0	.
chr4	137867638	137868139	.	0	.
chr8	35005901	35006402	.	0	.
chr9	67574756	67575257	.	0	.
chr14	121754133	121754634	.	0	.
chr4	55644869	55645370	.	0	.
chr6	135141384	135141885	.	0	.
chr4	136741858	136742359	.	0	.
chr11	117934099	117934600	.	0	.
chr16	77759969	77760470	.	0	.
chr19	42845402	42845903	.	0	.
chr1	85928235	85928736	.	0	.
chr6	42374756	42375257	.	0	.
chr3	65441600	65442101	.	0	.
chr7	29481268	29481769	.	0	.
chr12	109553110	109553611	.	0	.
chr2	33790593	33791094	.	0	.
chr10	39512958	39513459	.	0	.
chr5	149612060	149612561	.	0	.
chr19	5498282	5498783	.	0	.
chr9	16167987	16168488	.	0	.
chr7	132358668	132359169	.	0	.
chr11	119976000	119976501	.	0	.
chr16	87552847	87553348	.	0	.
chr8	84219682	84220183	.	0	.
chr15	99518830	99519331	.	0	.
chr7	16405011	16405512	.	0	.
chr8	83612729	83613230	.	0	.
chr13	100724010	100724511	.	0	.
chr11	103235545	103236046	.	0	.
chr4	62731653	62732154	.	0	.
chr2	47088615	47089116	.	0	.
chr1	90257411	90257912	.	0	.
chr11	100974351	100974852	.	0	.
chr5	147090480	147090981	.	0	.
chr4	55563043	55563544	.	0	.
chr7	67740801	67741302	.	0	.
chr12	112654585	112655086	.	0	.
chr6	117299751	117300252	.	0	.
chr10	39532433	39532934	.	0	.
chr4	63662115	63662616	.	0	.
chr2	146015536	146016037	.	0	.
chr15	101070061	101070562	.	0	.
chr2	168572751	168573252	.	0	.
chr3	88486639	88487140	.	0	.
chr8	110941465	110941966	.	0	.
chr3	55447875	55448376	.	0	.
chr6	4994603	4995104	.	0	.
chr14	70087309	70087810	.	0	.
chr11	120256828	120257329	.	0	.
chr12	109547462	109547963	.	0	.
chr2	174871732	174872233	.	0	.
chr8	8640071	8640572	.	0	.
chr15	58018122	58018623	.	0	.
chr1	91701390	91701891	.	0	.
chr2	24538843	24539344	.	0	.
chr11	119988269	119988770	.	0	.
chr16	12307532	12308033	.	0	.
chr11	87822789	87823290	.	0	.
chr15	27806169	27806670	.	0	.
chr2	59772708	59773209	.	0	.
chr14	70086597	70087098	.	0	.
chr13	16937822	16938323	.	0	.
chr6	87100112	87100613	.	0	.
chr4	145272685	145273186	.	0	.
chr1	156790058	156790559	.	0	.
chr9	61164385	61164886	.	0	.
chr4	117380125	117380626	.	0	.
chr19	9007707	9008208	.	0	.
chr2	173622239	173622740	.	0	.
chr14	120379722	120380223	.	0	.
chr2	31376148	31376649	.	0	.
chr12	8450622	8451123	.	0	.
chr16	10850498	10850999	.	0	.
chr18	36111188	36111689	.	0	.
chr9	67028043	67028544	.	0	.
chr2	169998248	169998749	.	0	.
chr15	102120021	102120522	.	0	.
chr16	10866726	10867227	.	0	.
chr15	94444719	94445220	.	0	.
chr11	105333594	105334095	.	0	.
chr2	79061991	79062492	.	0	.
chr6	90359325	90359826	.	0	.
chr19	8996559	8997060	.	0	.
chr2	168574901	168575402	.	0	.
chr4	137033502	137034003	.	0	.
chr10	4005403	4005904	.	0	.
chr11	120007796	120008297	.	0	.
chr2	174888451	174888952	.	0	.
chr5	74750408	74750909	.	0	.
chr15	101278678	101279179	.	0	.
chr16	35065526	35066027	.	0	.
chr11	49755112	49755613	.	0	.
chr8	84213320	84213821	.	0	.
chr8	77733721	77734222	.	0	.
chr12	109558154	109558655	.	0	.
chr7	19299107	19299608	.	0	.
chr16	18203569	18204070	.	0	.
chr11	7299234	7299735	.	0	.
chrX	99213493	99213994	.	0	.
chr19	5792258	5792759	.	0	.
chr3	98073451	98073952	.	0	.
chr1	71971923	71972424	.	0	.
chrX	74224922	74225423	.	0	.
chr7	34939762	34940263	.	0	.
chr14	8374982	8375483	.	0	.
chr3	88476359	88476860	.	0	.
chr2	29444334	29444835	.	0	.
chr3	88500657	88501158	.	0	.
chr7	4926113	4926614	.	0	.
chr2	170548017	170548518	.	0	.
chr4	13436267	13436768	.	0	.
chr1	93207356	93207857	.	0	.
chr10	39470274	39470775	.	0	.
chr11	63545480	63545981	.	0	.
chr13	46885513	46886014	.	0	.
chr6	135362130	135362631	.	0	.
chr2	132444747	132445248	.	0	.
chr4	105332399	105332900	.	0	.
chr12	99159942	99160443	.	0	.
chr19	9005456	9005957	.	0	.
chr3	87761428	87761929	.	0	.
chr19	45549176	45549677	.	0	.
chr18	46867788	46868289	.	0	.
chr4	139175971	139176472	.	0	.
chr7	130215865	130216366	.	0	.
chr7	80324627	80325128	.	0	.
chr5	116420667	116421168	.	0	.
chr1	135366988	135367489	.	0	.
chr6	35378791	35379292	.	0	.
chr3	87944812	87945313	.	0	.
chr9	107703663	107704164	.	0	.
chr7	132853920	132854421	.	0	.
chr16	34940294	34940795	.	0	.
chr4	131407430	131407931	.	0	.
chr12	109610021	109610522	.	0	.
chr15	83847867	83848368	.	0	.
chr1	43123499	43124000	.	0	.
chrX	74226241	74226742	.	0	.
chr17	46540106	46540607	.	0	.
chr7	27281923	27282424	.	0	.
chr19	9004766	9005267	.	0	.
chr5	33528463	33528964	.	0	.
chr6	119018975	119019476	.	0	.
chr19	56364042	56364543	.	0	.
chr8	70711582	70712083	.	0	.
chr15	38173437	38173938	.	0	.
chr13	112383094	112383595	.	0	.
chr3	121601993	121602494	.	0	.
chr11	61448630	61449131	.	0	.
chr12	40736335	40736836	.	0	.
chr6	145713307	145713808	.	0	.
chr1	183437917	183438418	.	0	.
chr8	116430003	116430504	.	0	.
chr11	6030641	6031142	.	0	.
chr14	48197429	48197930	.	0	.
chr17	45769796	45770297	.	0	.
chr11	4263984	4264485	.	0	.
chr17	49031803	49032304	.	0	.
chr8	70712117	70712618	.	0	.
chr2	112482929	112483430	.	0	.
chr5	149619272	149619773	.	0	.
chr16	87001253	87001754	.	0	.
chr5	149622021	149622522	.	0	.
chr7	143310857	143311358	.	0	.
chr11	100950282	100950783	.	0	.
chr10	85175197	85175698	.	0	.
chr8	27104110	27104611	.	0	.
chr2	35604309	35604810	.	0	.
chr3	8772335	8772836	.	0	.
chr8	120485490	120485991	.	0	.
chr11	100963598	100964099	.	0	.
chr11	115467139	115467640	.	0	.
chr14	24822934	24823435	.	0	.
chr3	37182616	37183117	.	0	.
chr3	123160097	123160598	.	0	.
chr17	85949230	85949731	.	0	.
chr18	76087859	76088360	.	0	.
chr14	64222918	64223419	.	0	.
chr5	129066495	129066996	.	0	.
chr8	61639670	61640171	.	0	.
chr4	63227305	63227806	.	0	.
chr2	37906343	37906844	.	0	.
chr11	46095528	46096029	.	0	.
chr1	60825758	60826259	.	0	.
chr12	110685194	110685695	.	0	.
chr9	64058140	64058641	.	0	.
chr7	19284086	19284587	.	0	.
chr4	145323109	145323610	.	0	.
chr12	109551577	109552078	.	0	.
chr18	36370550	36371051	.	0	.
chr6	137343611	137344112	.	0	.
chr7	28576558	28577059	.	0	.
chr6	124854922	124855423	.	0	.
chr12	109562436	109562937	.	0	.
chr13	119710167	119710668	.	0	.
chr8	84217653	84218154	.	0	.
chr4	136800430	136800931	.	0	.
chr4	64437859	64438360	.	0	.
chr17	29062235	29062736	.	0	.
chr1	135751157	135751658	.	0	.
chr11	59390425	59390926	.	0	.
chr16	58303393	58303894	.	0	.
chr12	108308283	108308784	.	0	.
chr1	51617591	51618092	.	0	.
chr12	84374013	84374514	.	0	.
chr19	4928747	4929248	.	0	.
chr7	98736791	98737292	.	0	.
chr1	39046239	39046740	.	0	.
chr12	109462529	109463030	.	0	.
chr9	50446656	50447157	.	0	.
chr1	93101674	93102175	.	0	.
chr9	47861574	47862075	.	0	.
chr6	137840504	137841005	.	0	.
chr2	32742191	32742692	.	0	.
chr3	142940866	142941367	.	0	.
chr17	78515702	78516203	.	0	.
chr16	30692426	30692927	.	0	.
chr5	115665486	115665987	.	0	.
chr14	117931132	117931633	.	0	.
chr8	70717704	70718205	.	0	.
chr18	43437491	43437992	.	0	.
chr8	88552678	88553179	.	0	.
chr15	84634331	84634832	.	0	.
chr2	166098065	166098566	.	0	.
chr14	25735985	25736486	.	0	.
chr6	17522258	17522759	.	0	.
chr7	34939194	34939695	.	0	.
chr12	109590042	109590543	.	0	.
chr9	58420052	58420553	.	0	.
chr10	94931860	94932361	.	0	.
chr19	9002331	9002832	.	0	.
chr5	38543891	38544392	.	0	.
chr8	124284275	124284776	.	0	.
chr2	26073033	26073534	.	0	.
chr7	66528877	66529378	.	0	.
chr2	167079687	167080188	.	0	.
chr17	29818904	29819405	.	0	.
chr2	168574338	168574839	.	0	.
chr15	94443966	94444467	.	0	.
chr15	83849413	83849914	.	0	.
chr14	76033185	76033686	.	0	.
chr8	83619092	83619593	.	0	.
chr14	54445418	54445919	.	0	.
chr8	12996675	12997176	.	0	.
chr9	106322515	106323016	.	0	.
chr2	73265954	73266455	.	0	.
chr10	13425094	13425595	.	0	.
chr11	112976735	112977236	.	0	.
chr10	61499943	61500444	.	0	.
chr7	45186002	45186503	.	0	.
chr12	31134543	31135044	.	0	.
chr3	89201923	89202424	.	0	.
chr2	168587780	168588281	.	0	.
chr4	25028500	25029001	.	0	.
chr15	67110421	67110922	.	0	.
chr7	51899014	51899515	.	0	.
chr10	126935826	126936327	.	0	.
chr19	38293726	38294227	.	0	.
chr3	88482874	88483375	.	0	.
chr1	193334583	193335084	.	0	.
chr11	76449848	76450349	.	0	.
chr15	52480842	52481343	.	0	.
chr6	32837983	32838484	.	0	.
chrX	103740852	103741353	.	0	.
chr4	98419375	98419876	.	0	.
chr5	117117679	117118180	.	0	.
chr3	94987550	94988051	.	0	.
chr11	30483145	30483646	.	0	.
chr3	95677339	95677840	.	0	.
chr2	144949178	144949679	.	0	.
chr1	90843241	90843742	.	0	.
chr7	127801143	127801644	.	0	.
chr17	34954641	34955142	.	0	.
chr2	92425227	92425728	.	0	.
chr7	44957377	44957878	.	0	.
chr12	109554555	109555056	.	0	.
chr13	97986600	97987101	.	0	.
chr5	142973966	142974467	.	0	.
chr4	142250234	142250735	.	0	.
chr2	33787414	33787915	.	0	.
chr9	35312470	35312971	.	0	.
chr19	6463957	6464458	.	0	.
chr12	75869056	75869557	.	0	.
chr9	121761183	121761684	.	0	.
chr1	179004185	179004686	.	0	.
chr7	110731299	110731800	.	0	.
chr2	34632148	34632649	.	0	.
chr12	109542750	109543251	.	0	.
chr16	11636177	11636678	.	0	.
chr6	52428428	52428929	.	0	.
chr7	68409728	68410229	.	0	.
chr2	166152092	166152593	.	0	.
chr11	53308286	53308787	.	0	.
chr1	135188107	135188608	.	0	.
chr5	21933619	21934120	.	0	.
chr4	136833896	136834397	.	0	.
chr2	174872262	174872763	.	0	.
chr4	105326945	105327446	.	0	.
chr12	54449767	54450268	.	0	.
chr13	94012158	94012659	.	0	.
chr15	34412155	34412656	.	0	.
chr2	173425919	173426420	.	0	.
chr18	61652197	61652698	.	0	.
chr9	116676539	116677040	.	0	.
chr4	155272391	155272892	.	0	.
chr1	180672102	180672603	.	0	.
chr17	66270000	66270501	.	0	.
chr12	13048338	13048839	.	0	.
chr8	120261677	120262178	.	0	.
chr17	11238937	11239438	.	0	.
chr4	40735391	40735892	.	0	.
chr17	51760454	51760955	.	0	.
chr11	73022950	73023451	.	0	.
chr3	115969101	115969602	.	0	.
chr17	56814748	56815249	.	0	.
chr5	72356063	72356564	.	0	.
chr6	98307220	98307721	.	0	.
chr15	3424649	3425150	.	0	.
chr11	59365302	59365803	.	0	.
chr4	124950346	124950847	.	0	.
chr1	90248469	90248970	.	0	.
chr14	87568428	87568929	.	0	.
chr19	9017205	9017706	.	0	.
chr7	134151265	134151766	.	0	.
chr2	84229715	84230216	.	0	.
chr19	27378338	27378839	.	0	.
chr11	120008992	120009493	.	0	.
chr12	109581996	109582497	.	0	.
chr2	168569038	168569539	.	0	.
chr4	105747727	105748228	.	0	.
chr7	34764312	34764813	.	0	.
chr8	70713981	70714482	.	0	.
chr2	168577698	168578199	.	0	.
chr19	9017871	9018372	.	0	.
chr8	41148519	41149020	.	0	.
chr11	51345126	51345627	.	0	.
chr8	118408337	118408838	.	0	.
chr8	116383385	116383886	.	0	.
chr9	16153421	16153922	.	0	.
chr5	35643288	35643789	.	0	.
chr5	111396699	111397200	.	0	.
chr2	27573025	27573526	.	0	.
chr15	85172055	85172556	.	0	.
chr4	95092264	95092765	.	0	.
chr4	45252766	45253267	.	0	.
chr18	77432466	77432967	.	0	.
chr11	85776831	85777332	.	0	.
chr1	183124384	183124885	.	0	.
chr8	70448039	70448540	.	0	.
chr11	59308403	59308904	.	0	.
chr18	65273362	65273863	.	0	.
chr5	141574230	141574731	.	0	.
chr15	38176326	38176827	.	0	.
chr9	21544558	21545059	.	0	.
chr2	29465017	29465518	.	0	.
chr17	10734402	10734903	.	0	.
chr1	162609569	162610070	.	0	.
chr4	102509972	102510473	.	0	.
chr15	64578945	64579446	.	0	.
chr17	71289608	71290109	.	0	.
chr1	82451923	82452424	.	0	.
chr1	193089743	193090244	.	0	.
chr13	69441635	69442136	.	0	.
chr14	32896846	32897347	.	0	.
chr9	123137201	123137702	.	0	.
chr6	31357179	31357680	.	0	.
chr8	70710962	70711463	.	0	.
chr3	145277791	145278292	.	0	.
chr13	99736699	99737200	.	0	.
chr5	127374280	127374781	.	0	.
chr3	87776141	87776642	.	0	.
chr2	168572097	168572598	.	0	.
chr8	84216983	84217484	.	0	.
chr16	15086506	15087007	.	0	.
chr12	109546934	109547435	.	0	.
chr6	103507591	103508092	.	0	.
chr2	79083505	79084006	.	0	.
chr12	71906767	71907268	.	0	.
chr5	142903570	142904071	.	0	.
chr19	5795318	5795819	.	0	.
chr12	109612802	109613303	.	0	.
chr3	122088307	122088808	.	0	.
chr11	113394298	113394799	.	0	.
chr12	109746105	109746606	.	0	.
chr13	16343538	16344039	.	0	.
chr11	107968720	107969221	.	0	.
chr1	128909719	128910220	.	0	.
chr2	93227724	93228225	.	0	.
chr3	84024726	84025227	.	0	.
chr4	142326793	142327294	.	0	.
chr1	38743720	38744221	.	0	.
chr11	109538710	109539211	.	0	.
chr13	16016395	16016896	.	0	.
chr5	149609362	149609863	.	0	.
chr6	51489643	51490144	.	0	.
chr4	141011565	141012066	.	0	.
chr17	49205122	49205623	.	0	.
chr4	148181626	148182127	.	0	.
chr5	74633306	74633807	.	0	.
chr2	93284611	93285112	.	0	.
chr11	70609520	70610021	.	0	.
chr10	80679431	80679932	.	0	.
chr11	107786455	107786956	.	0	.
chr1	191164340	191164841	.	0	.
chr8	122586191	122586692	.	0	.
chr3	107746149	107746650	.	0	.
chr1	74770103	74770604	.	0	.
chr6	120114667	120115168	.	0	.
chr4	142410841	142411342	.	0	.
chr2	166579987	166580488	.	0	.
chr9	121974293	121974794	.	0	.
chr6	115972051	115972552	.	0	.
chr4	83350619	83351120	.	0	.
chr8	120556209	120556710	.	0	.
chrX	161940794	161941295	.	0	.
chr7	35086146	35086647	.	0	.
chr19	9022990	9023491	.	0	.
chr2	35568260	35568761	.	0	.
chr16	44695782	44696283	.	0	.
chr4	154209597	154210098	.	0	.
chr8	47116878	47117379	.	0	.
chr4	129933666	129934167	.	0	.
chr4	105175921	105176422	.	0	.
chr12	8856115	8856616	.	0	.
chr5	111408539	111409040	.	0	.
chr2	26147740	26148241	.	0	.
chr8	18693020	18693521	.	0	.
chr2	93483560	93484061	.	0	.
chr6	114891773	114892274	.	0	.
chr4	149820565	149821066	.	0	.
chr1	126917800	126918301	.	0	.
chr4	100011405	100011906	.	0	.
chr8	84215011	84215512	.	0	.
chr8	120215803	120216304	.	0	.
chr7	17060712	17061213	.	0	.
chr19	15745038	15745539	.	0	.
chr1	78859990	78860491	.	0	.
chr10	87605424	87605925	.	0	.
chr3	104349475	104349976	.	0	.
chr3	79790048	79790549	.	0	.
chr9	34666072	34666573	.	0	.
chr8	26811800	26812301	.	0	.
chr5	35627342	35627843	.	0	.
chr19	23142634	23143135	.	0	.
chr2	168565475	168565976	.	0	.
chr11	103340559	103341060	.	0	.
chr2	110085496	110085997	.	0	.
chr13	119712196	119712697	.	0	.
chr7	6749030	6749531	.	0	.
chr9	106356435	106356936	.	0	.
chr12	109532319	109532820	.	0	.
chr11	45263793	45264294	.	0	.
chr4	142160033	142160534	.	0	.
chr4	41254379	41254880	.	0	.
chr2	34969102	34969603	.	0	.
chr7	96265907	96266408	.	0	.
chr3	37380087	37380588	.	0	.
chr1	135749332	135749833	.	0	.
chr8	116384044	116384545	.	0	.
chr9	6170741	6171242	.	0	.
chr12	106312788	106313289	.	0	.
chr5	42685592	42686093	.	0	.
chr4	130209090	130209591	.	0	.
chr2	71958341	71958842	.	0	.
chr8	31371157	31371658	.	0	.
chr3	95210428	95210929	.	0	.
chr16	12217251	12217752	.	0	.
chr12	84531783	84532284	.	0	.
chr7	121339988	121340489	.	0	.
chr9	115130583	115131084	.	0	.
chr5	111122603	111123104	.	0	.
chr9	110775590	110776091	.	0	.
chr16	34935057	34935558	.	0	.
chr4	117850824	117851325	.	0	.
chr11	32785911	32786412	.	0	.
chr1	164326738	164327239	.	0	.
chr6	126100547	126101048	.	0	.
chr16	40891376	40891877	.	0	.
chr19	53856713	53857214	.	0	.
chr13	60100855	60101356	.	0	.
chr11	101188635	101189136	.	0	.
chr7	27480791	27481292	.	0	.
chr7	72215773	72216274	.	0	.
chr17	47693203	47693704	.	0	.
chr14	16735304	16735805	.	0	.
chr8	84741601	84742102	.	0	.
chr13	102593232	102593733	.	0	.
chr4	137283816	137284317	.	0	.
chr4	153542406	153542907	.	0	.
chr13	36734230	36734731	.	0	.
chr7	16971169	16971670	.	0	.
chr5	28868280	28868781	.	0	.
chr1	45672689	45673190	.	0	.
chr12	109591827	109592328	.	0	.
chr1	193402483	193402984	.	0	.
chr1	74686004	74686505	.	0	.
chr8	27068340	27068841	.	0	.
chr7	136081478	136081979	.	0	.
chr16	8620143	8620644	.	0	.
chr12	70407557	70408058	.	0	.
chr13	63951799	63952300	.	0	.
chr13	30789878	30790379	.	0	.
chr19	9020012	9020513	.	0	.
chr11	101231531	101232032	.	0	.
chr7	96536355	96536856	.	0	.
chr8	83618294	83618795	.	0	.
chr12	109950264	109950765	.	0	.
chr5	28080913	28081414	.	0	.
chr1	164797778	164798279	.	0	.
chr2	7224710	7225211	.	0	.
chr4	137891763	137892264	.	0	.
chr9	96134921	96135422	.	0	.
chr3	88500113	88500614	.	0	.
chr17	49671977	49672478	.	0	.
chr3	88487320	88487821	.	0	.
chr7	118935283	118935784	.	0	.
chr7	134098983	134099484	.	0	.
chr19	7070137	7070638	.	0	.
chr4	130084487	130084988	.	0	.
chr19	9106005	9106506	.	0	.
chr9	111542301	111542802	.	0	.
chr6	90802490	90802991	.	0	.
chr7	130677556	130678057	.	0	.
chr19	9000012	9000513	.	0	.
chr18	46860830	46861331	.	0	.
chr6	108926656	108927157	.	0	.
chr19	53833904	53834405	.	0	.
chr18	61424090	61424591	.	0	.
chr2	32739211	32739712	.	0	.
chr2	27861754	27862255	.	0	.
chr12	33193509	33194010	.	0	.
chr3	9756944	9757445	.	0	.
chr5	140672540	140673041	.	0	.
chr2	31171962	31172463	.	0	.
chr7	36310170	36310671	.	0	.
chr4	139916660	139917161	.	0	.
chr7	119089906	119090407	.	0	.
chr4	114386337	114386838	.	0	.
chr14	68052179	68052680	.	0	.
chr15	101852918	101853419	.	0	.
chr17	86277023	86277524	.	0	.
chr8	72323548	72324049	.	0	.
chr2	166271460	166271961	.	0	.
chr6	112789939	112790440	.	0	.
chr6	35349790	35350291	.	0	.
chr4	106869035	106869536	.	0	.
chr15	49874510	49875011	.	0	.
chr14	117929937	117930438	.	0	.
chr6	42363564	42364065	.	0	.
chr10	83942042	83942543	.	0	.
chr3	120217613	120218114	.	0	.
chr5	33218037	33218538	.	0	.
chrX	99509410	99509911	.	0	.
chr8	41073969	41074470	.	0	.
chr12	109588481	109588982	.	0	.
chr7	126086342	126086843	.	0	.
chr1	178933861	178934362	.	0	.
chr19	38260342	38260843	.	0	.
chr6	90323918	90324419	.	0	.
chr9	102649876	102650377	.	0	.
chr12	86837864	86838365	.	0	.
chr14	22213597	22214098	.	0	.
chr7	142480722	142481223	.	0	.
chr5	111228258	111228759	.	0	.
chr19	9014633	9015134	.	0	.
chr3	131288165	131288666	.	0	.
chr10	89736291	89736792	.	0	.
chr8	14603277	14603778	.	0	.
chr9	60309674	60310175	.	0	.
chr16	35591688	35592189	.	0	.
chr9	116965575	116966076	.	0	.
chr12	108433435	108433936	.	0	.
chr8	70719692	70720193	.	0	.
chr17	3442484	3442985	.	0	.
chr19	60439880	60440381	.	0	.
chr2	32951221	32951722	.	0	.
chr7	111599769	111600270	.	0	.
chr4	47269703	47270204	.	0	.
chr9	51442033	51442534	.	0	.
chr8	91445434	91445935	.	0	.
chr16	38689680	38690181	.	0	.
chr8	84657741	84658242	.	0	.
chr8	27059398	27059899	.	0	.
chr19	45132486	45132987	.	0	.
chr8	88542364	88542865	.	0	.
chr5	127468002	127468503	.	0	.
chr19	23958925	23959426	.	0	.
chr8	120449657	120450158	.	0	.
chr6	50986010	50986511	.	0	.
chr11	81679298	81679799	.	0	.
chr11	32786461	32786962	.	0	.
chrX	74232843	74233344	.	0	.
chr9	27626339	27626840	.	0	.
chr6	87111335	87111836	.	0	.
chr9	67034989	67035490	.	0	.
chr12	69683092	69683593	.	0	.
chr12	99352093	99352594	.	0	.
chr13	9757757	9758258	.	0	.
chr1	91611697	91612198	.	0	.
chr6	145192253	145192754	.	0	.
chr17	47189749	47190250	.	0	.
chr1	135746111	135746612	.	0	.
chr12	111926650	111927151	.	0	.
chr9	106355826	106356327	.	0	.
chr10	98753607	98754108	.	0	.
chr2	150777895	150778396	.	0	.
chr12	82397743	82398244	.	0	.
chr17	83106020	83106521	.	0	.
chr14	64223701	64224202	.	0	.
chr3	55587919	55588420	.	0	.
chr7	111813008	111813509	.	0	.
chr7	58748288	58748789	.	0	.
chr12	70486885	70487386	.	0	.
chr7	129676345	129676846	.	0	.
chr12	34648633	34649134	.	0	.
chr1	36441019	36441520	.	0	.
chr11	35417848	35418349	.	0	.
chr12	85862587	85863088	.	0	.
chr9	107630606	107631107	.	0	.
chr1	35866175	35866676	.	0	.
chr4	105331768	105332269	.	0	.
chr1	7055053	7055554	.	0	.
chr12	112661290	112661791	.	0	.
chr6	32052396	32052897	.	0	.
chr18	46866750	46867251	.	0	.
chr8	84659090	84659591	.	0	.
chr5	114530347	114530848	.	0	.
chr5	72329402	72329903	.	0	.
chr18	61658037	61658538	.	0	.
chr11	54880943	54881444	.	0	.
chr4	136779520	136780021	.	0	.
chr6	93167253	93167754	.	0	.
chr15	80075463	80075964	.	0	.
chr3	88473995	88474496	.	0	.
chr12	79679867	79680368	.	0	.
chr1	90139065	90139566	.	0	.
chr14	48198173	48198674	.	0	.
chr12	109571143	109571644	.	0	.
chr3	88476924	88477425	.	0	.
chr14	119156149	119156650	.	0	.
chr7	31053250	31053751	.	0	.
chr18	60935169	60935670	.	0	.
chr7	120865746	120866247	.	0	.
chr12	109615300	109615801	.	0	.
chr13	58971631	58972132	.	0	.
chr2	130118052	130118553	.	0	.
chr13	20354536	20355037	.	0	.
chr1	191167200	191167701	.	0	.
chr1	89849899	89850400	.	0	.
chr19	8994242	8994743	.	0	.
chr1	46829924	46830425	.	0	.
chr18	67404186	67404687	.	0	.
chr9	75193810	75194311	.	0	.
chrX	74231236	74231737	.	0	.
chr11	33012687	33013188	.	0	.
chr4	137797754	137798255	.	0	.
chr15	73254575	73255076	.	0	.
chr12	36313805	36314306	.	0	.
chr15	102187999	102188500	.	0	.
chr6	30636335	30636836	.	0	.
chr6	135138769	135139270	.	0	.
chr2	35603767	35604268	.	0	.
chr14	28057223	28057724	.	0	.
chr3	152688435	152688936	.	0	.
chr18	76086555	76087056	.	0	.
chr8	72326649	72327150	.	0	.
chr7	99336203	99336704	.	0	.
chr5	71571579	71572080	.	0	.
chr2	10216434	10216935	.	0	.
chr11	114182629	114183130	.	0	.
chr16	93116527	93117028	.	0	.
chr12	109610570	109611071	.	0	.
chr7	28918267	28918768	.	0	.
chr4	136282837	136283338	.	0	.
chr8	70721426	70721927	.	0	.
chr8	78717627	78718128	.	0	.
chr4	136807675	136808176	.	0	.
chr1	153005398	153005899	.	0	.
chr11	75263967	75264468	.	0	.
chr1	89848673	89849174	.	0	.
chr12	112842514	112843015	.	0	.
chr9	47279467	47279968	.	0	.
chr1	180541854	180542355	.	0	.
chr4	101719119	101719620	.	0	.
chr12	109463356	109463857	.	0	.
chr4	123688306	123688807	.	0	.
chr19	43653577	43654078	.	0	.
chr10	75112381	75112882	.	0	.
chr5	28082269	28082770	.	0	.
chr4	72379562	72380063	.	0	.
chr17	31864107	31864608	.	0	.
chr9	40807721	40808222	.	0	.
chr5	72355479	72355980	.	0	.
chr12	5220318	5220819	.	0	.
chr2	168573799	168574300	.	0	.
chr14	54769375	54769876	.	0	.
chr6	87102689	87103190	.	0	.
chr19	24371940	24372441	.	0	.
chr5	23982060	23982561	.	0	.
chr6	50721407	50721908	.	0	.
chr14	28240576	28241077	.	0	.
chr16	93116022	93116523	.	0	.
chr3	144586627	144587128	.	0	.
chr8	123879904	123880405	.	0	.
chr7	129872095	129872596	.	0	.
chr10	21790045	21790546	.	0	.
chr5	80093583	80094084	.	0	.
chr7	132259260	132259761	.	0	.
chr18	62992167	62992668	.	0	.
chr14	31665082	31665583	.	0	.
chr6	84493121	84493622	.	0	.
chr9	65386394	65386895	.	0	.
chr13	119716430	119716931	.	0	.
chr6	51150082	51150583	.	0	.
chr2	93779193	93779694	.	0	.
chr4	95048603	95049104	.	0	.
chr10	4006312	4006813	.	0	.
chr19	9025589	9026090	.	0	.
chr1	37063644	37064145	.	0	.
chr8	114652356	114652857	.	0	.
chr16	4869150	4869651	.	0	.
chr14	120960417	120960918	.	0	.
chr11	94949093	94949594	.	0	.
chr6	117976025	117976526	.	0	.
chr12	88783932	88784433	.	0	.
chr19	9020620	9021121	.	0	.
chr8	122710399	122710900	.	0	.
chr1	135752339	135752840	.	0	.
chr1	43144294	43144795	.	0	.
chr7	99334575	99335076	.	0	.
chr15	85012003	85012504	.	0	.
chr2	28974346	28974847	.	0	.
chr7	125976620	125977121	.	0	.
chr9	51854734	51855235	.	0	.
chr9	56851049	56851550	.	0	.
chr9	45465243	45465744	.	0	.
chr19	5715207	5715708	.	0	.
chr1	43117448	43117949	.	0	.
chr8	124571597	124572098	.	0	.
chr5	24942011	24942512	.	0	.
chr17	46129665	46130166	.	0	.
chr11	119208767	119209268	.	0	.
chr14	21892105	21892606	.	0	.
chr7	79867827	79868328	.	0	.
chr13	24678991	24679492	.	0	.
chr5	35632802	35633303	.	0	.
chr9	41303174	41303675	.	0	.
chr19	47346662	47347163	.	0	.
chr12	16860388	16860889	.	0	.
chr1	126911539	126912040	.	0	.
chr15	27805566	27806067	.	0	.
chr4	125924840	125925341	.	0	.
chr1	34326845	34327346	.	0	.
chr9	69456787	69457288	.	0	.
chr11	52418398	52418899	.	0	.
chr4	136836554	136837055	.	0	.
chr13	60330451	60330952	.	0	.
chr8	70723209	70723710	.	0	.
chr11	49755635	49756136	.	0	.
chr1	135746633	135747134	.	0	.
chr19	21990817	21991318	.	0	.
chr2	27412222	27412723	.	0	.
chr12	85477150	85477651	.	0	.
chr1	43146491	43146992	.	0	.
chr14	70090261	70090762	.	0	.
chr1	151000610	151001111	.	0	.
chr1	15912780	15913281	.	0	.
chr16	13245595	13246096	.	0	.
chr8	87805024	87805525	.	0	.
chr17	29149060	29149561	.	0	.
chr7	128007559	128008060	.	0	.
chr18	65784501	65785002	.	0	.
chr12	109559596	109560097	.	0	.
chr9	102651343	102651844	.	0	.
chr1	154704457	154704958	.	0	.
chr11	24099143	24099644	.	0	.
chr6	29397404	29397905	.	0	.
chr1	62343800	62344301	.	0	.
chr7	105677790	105678291	.	0	.
chr4	82531990	82532491	.	0	.
chr4	120875249	120875750	.	0	.
chr12	53832664	53833165	.	0	.
chr1	185140203	185140704	.	0	.
chr12	110372683	110373184	.	0	.
chr13	37411026	37411527	.	0	.
chr3	137680814	137681315	.	0	.
chr10	78467711	78468212	.	0	.
chr18	36110073	36110574	.	0	.
chr16	44625180	44625681	.	0	.
chr4	117656943	117657444	.	0	.
chr3	88486081	88486582	.	0	.
chr2	166522531	166523032	.	0	.
chr2	29486878	29487379	.	0	.
chr4	63228852	63229353	.	0	.
chr7	3304448	3304949	.	0	.
chr17	14231260	14231761	.	0	.
chr3	27631045	27631546	.	0	.
chr2	33789597	33790098	.	0	.
chr6	87141930	87142431	.	0	.
chr19	9013035	9013536	.	0	.
chr13	16015890	16016391	.	0	.
chr9	84139614	84140115	.	0	.
chr13	49466664	49467165	.	0	.
chr8	67532103	67532604	.	0	.
chr12	109416516	109417017	.	0	.
chr7	119092155	119092656	.	0	.
chr8	120347753	120348254	.	0	.
chr13	35848662	35849163	.	0	.
chr4	152662404	152662905	.	0	.
chr1	37332757	37333258	.	0	.
chr1	120229519	120230020	.	0	.
chr8	121003117	121003618	.	0	.
chr5	121690503	121691004	.	0	.
chr17	27873911	27874412	.	0	.
chr3	95686728	95687229	.	0	.
chr13	16032777	16033278	.	0	.
chr2	136064265	136064766	.	0	.
chr9	44497018	44497519	.	0	.
chr12	82999967	83000468	.	0	.
chr2	13385170	13385671	.	0	.
chr13	104631765	104632266	.	0	.
chr2	166094986	166095487	.	0	.
chr1	59399458	59399959	.	0	.
chr5	86769071	86769572	.	0	.
chr16	4870794	4871295	.	0	.
chr14	25227847	25228348	.	0	.
chr14	28043993	28044494	.	0	.
chr16	5672808	5673309	.	0	.
chr2	130117251	130117752	.	0	.
chr2	93476464	93476965	.	0	.
chr14	70090936	70091437	.	0	.
chrX	74210372	74210873	.	0	.
chr12	52013933	52014434	.	0	.
chr12	112961519	112962020	.	0	.
chr12	9582227	9582728	.	0	.
chr16	77760908	77761409	.	0	.
chr10	62060955	62061456	.	0	.
chr4	139174877	139175378	.	0	.
chr10	107341031	107341532	.	0	.
chr4	106854636	106855137	.	0	.
chr3	87087058	87087559	.	0	.
chr13	56102117	56102618	.	0	.
chr10	80662288	80662789	.	0	.
chr9	42413383	42413884	.	0	.
chr8	84218961	84219462	.	0	.
chr5	120570907	120571408	.	0	.
chr18	54406427	54406928	.	0	.
chr3	88469871	88470372	.	0	.
chr7	35091486	35091987	.	0	.
chr4	118564205	118564706	.	0	.
chr13	60100268	60100769	.	0	.
chr6	115957661	115958162	.	0	.
chr14	27201144	27201645	.	0	.
chr11	119966288	119966789	.	0	.
chr8	31370603	31371104	.	0	.
chr4	120665669	120666170	.	0	.
chr10	80680191	80680692	.	0	.
chr15	36846593	36847094	.	0	.
chr14	21990377	21990878	.	0	.
chr13	44468975	44469476	.	0	.
chr19	8995139	8995640	.	0	.
chr4	63217608	63218109	.	0	.
chr4	137735405	137735906	.	0	.
chr2	31742114	31742615	.	0	.
chrX	74230079	74230580	.	0	.
chr15	95366022	95366523	.	0	.
chrX	74227143	74227644	.	0	.
chr9	78473488	78473989	.	0	.
chrX	102166949	102167450	.	0	.
chr9	67027317	67027818	.	0	.
chr12	109578261	109578762	.	0	.
chr7	132345505	132346006	.	0	.
chr13	99033462	99033963	.	0	.
chr11	119958613	119959114	.	0	.
chr9	37057738	37058239	.	0	.
chr2	168583309	168583810	.	0	.
chr9	40813614	40814115	.	0	.
chr4	135970318	135970819	.	0	.
chr3	104956196	104956697	.	0	.
chr2	35301957	35302458	.	0	.
chr12	82999324	82999825	.	0	.
chr13	111185866	111186367	.	0	.
chr1	135356015	135356516	.	0	.
chr9	36932898	36933399	.	0	.
chr2	166080982	166081483	.	0	.
chr12	70395683	70396184	.	0	.
chr5	35454054	35454555	.	0	.
chr15	58799926	58800427	.	0	.
chr15	39813548	39814049	.	0	.
chr4	56172463	56172964	.	0	.
chr3	18452153	18452654	.	0	.
chr2	11443012	11443513	.	0	.
chr13	111184867	111185368	.	0	.
chr18	67404936	67405437	.	0	.
chr2	137067655	137068156	.	0	.
chr4	139154526	139155027	.	0	.
chr4	152953777	152954278	.	0	.
chr5	111637620	111638121	.	0	.
chr10	39532973	39533474	.	0	.
chr7	28558467	28558968	.	0	.
chr1	121111587	121112088	.	0	.
chr11	75262781	75263282	.	0	.
chr3	130682161	130682662	.	0	.
chr15	79370141	79370642	.	0	.
chr12	75827749	75828250	.	0	.
chr3	53406998	53407499	.	0	.
chr2	93482400	93482901	.	0	.
chr7	142917584	142918085	.	0	.
chr19	56022254	56022755	.	0	.
chr3	145676230	145676731	.	0	.
chr4	105199977	105200478	.	0	.
chr12	35997666	35998167	.	0	.
chr12	109555971	109556472	.	0	.
chr2	168596109	168596610	.	0	.
chr5	149616443	149616944	.	0	.
chr7	3300827	3301328	.	0	.
chr15	79265558	79266059	.	0	.
chr8	120225598	120226099	.	0	.
chr4	139103852	139104353	.	0	.
chr1	182074323	182074824	.	0	.
chr18	42753059	42753560	.	0	.
chr11	114511935	114512436	.	0	.
chr3	122518166	122518667	.	0	.
chr13	92765390	92765891	.	0	.
chr5	135556972	135557473	.	0	.
chr11	115786411	115786912	.	0	.
chr18	78236647	78237148	.	0	.
chr14	47756332	47756833	.	0	.
chr12	108362407	108362908	.	0	.
chr10	43527511	43528012	.	0	.
chr12	25790900	25791401	.	0	.
chr13	16937319	16937820	.	0	.
chr5	35702492	35702993	.	0	.
chr16	11775938	11776439	.	0	.
chr17	83109595	83110096	.	0	.
chr2	174871164	174871665	.	0	.
chr2	92018277	92018778	.	0	.
chr10	83945884	83946385	.	0	.
chr17	34692935	34693436	.	0	.
chr12	75365658	75366159	.	0	.
chr3	88615478	88615979	.	0	.
chr2	93779858	93780359	.	0	.
chr14	27171127	27171628	.	0	.
chr11	56798310	56798811	.	0	.
chr17	27424033	27424534	.	0	.
chr2	168527296	168527797	.	0	.
chr9	67038942	67039443	.	0	.
chr13	47820614	47821115	.	0	.
chr19	9010016	9010517	.	0	.
chr17	56092788	56093289	.	0	.
chr9	65175889	65176390	.	0	.
chr11	89130787	89131288	.	0	.
chr4	117372746	117373247	.	0	.
chr8	74906342	74906843	.	0	.
chr6	52464462	52464963	.	0	.
chr9	64449210	64449711	.	0	.
chr9	40822774	40823275	.	0	.
chr12	24642428	24642929	.	0	.
chr6	5802948	5803449	.	0	.
chr11	99129273	99129774	.	0	.
chr1	165662806	165663307	.	0	.
chr2	156726346	156726847	.	0	.
chr2	170547369	170547870	.	0	.
chr5	122528284	122528785	.	0	.
chr12	109549545	109550046	.	0	.
chr12	109545988	109546489	.	0	.
chr4	41481047	41481548	.	0	.
chr5	149610346	149610847	.	0	.
chr13	63985589	63986090	.	0	.
chr12	117111046	117111547	.	0	.
chr15	58779741	58780242	.	0	.
chr10	59743825	59744326	.	0	.
chr1	191167823	191168324	.	0	.
chr11	118320622	118321123	.	0	.
chr3	88471819	88472320	.	0	.
chr5	125384378	125384879	.	0	.
chr15	25893328	25893829	.	0	.
chr3	38246325	38246826	.	0	.
chr6	99850091	99850592	.	0	.
chr4	72204619	72205120	.	0	.
chr5	35608749	35609250	.	0	.
chr18	67395788	67396289	.	0	.
chr12	4509049	4509550	.	0	.
chr12	109550380	109550881	.	0	.
chr16	45984507	45985008	.	0	.
chr9	78353753	78354254	.	0	.
chr1	132378200	132378701	.	0	.
chr12	29347489	29347990	.	0	.
chr19	5065045	5065546	.	0	.
chr18	20514258	20514759	.	0	.
chr4	123765751	123766252	.	0	.
chr19	5703180	5703681	.	0	.
chr12	109585233	109585734	.	0	.
chr16	97670472	97670973	.	0	.
chr12	52673313	52673814	.	0	.
chr12	109549043	109549544	.	0	.
chr5	149618708	149619209	.	0	.
chr5	74311855	74312356	.	0	.
chr4	105181334	105181835	.	0	.
chr17	56360423	56360924	.	0	.
chr16	5616248	5616749	.	0	.
chr2	168551121	168551622	.	0	.
chr3	122111551	122112052	.	0	.
chr11	54008337	54008838	.	0	.
chr12	109560177	109560678	.	0	.
chr9	42912131	42912632	.	0	.
chr1	183084346	183084847	.	0	.
chr8	93889029	93889530	.	0	.
chr2	29485656	29486157	.	0	.
chr3	24605465	24605966	.	0	.
chr2	165281822	165282323	.	0	.
chr13	94549526	94550027	.	0	.
chr5	102612986	102613487	.	0	.
chr4	108608598	108609099	.	0	.
chr9	13963371	13963872	.	0	.
chr7	121338657	121339158	.	0	.
chr5	114728077	114728578	.	0	.
chr5	16470359	16470860	.	0	.
chr5	149608598	149609099	.	0	.
chr8	88328722	88329223	.	0	.
chr4	150495359	150495860	.	0	.
chr12	4676611	4677112	.	0	.
chr12	109611175	109611676	.	0	.
chr10	95099818	95100319	.	0	.
chr19	6465038	6465539	.	0	.
chr8	33888900	33889401	.	0	.
chr9	106328993	106329494	.	0	.
chr4	105457027	105457528	.	0	.
chr8	32453569	32454070	.	0	.
chr8	40426708	40427209	.	0	.
chr15	102750696	102751197	.	0	.
chr1	60998667	60999168	.	0	.
chr16	63287506	63288007	.	0	.
chr2	28973840	28974341	.	0	.
chr7	48965355	48965856	.	0	.
chr10	80663109	80663610	.	0	.
chr9	107714136	107714637	.	0	.
chr2	32951742	32952243	.	0	.
chr10	126116528	126117029	.	0	.
chr6	126009167	126009668	.	0	.
chr4	135509546	135510047	.	0	.
chr4	40738244	40738745	.	0	.
chr18	40256708	40257209	.	0	.
chr9	98534553	98535054	.	0	.
chr15	86507844	86508345	.	0	.
chr2	168575474	168575975	.	0	.
chr10	62846876	62847377	.	0	.
chr14	75473442	75473943	.	0	.
chr9	67025981	67026482	.	0	.
chr5	74388077	74388578	.	0	.
chr2	26285718	26286219	.	0	.
chr1	90249012	90249513	.	0	.
chr4	141260024	141260525	.	0	.
chr12	110684315	110684816	.	0	.
chr16	4864498	4864999	.	0	.
chr15	93510648	93511149	.	0	.
chr7	28361957	28362458	.	0	.
chr4	114534318	114534819	.	0	.
chr7	97247600	97248101	.	0	.
chr9	62712439	62712940	.	0	.
chrX	12067765	12068266	.	0	.
chr1	135754204	135754705	.	0	.
chr10	8431874	8432375	.	0	.
chr2	168591119	168591620	.	0	.
chr13	56078771	56079272	.	0	.
chr18	36115202	36115703	.	0	.
chr13	69418380	69418881	.	0	.
chr11	21036489	21036990	.	0	.
chr8	70723770	70724271	.	0	.
chr1	185256716	185257217	.	0	.
chr4	120708716	120709217	.	0	.
chr9	62613286	62613787	.	0	.
chr6	39261715	39262216	.	0	.
chr6	53904291	53904792	.	0	.
chr4	138493643	138494144	.	0	.
chr6	145713990	145714491	.	0	.
chr2	119147164	119147665	.	0	.
chr5	32441849	32442350	.	0	.
chr13	81652207	81652708	.	0	.
chr8	70150689	70151190	.	0	.
chr13	112762110	112762611	.	0	.
chr15	30986884	30987385	.	0	.
chr2	32628567	32629068	.	0	.
chr18	12102709	12103210	.	0	.
chr13	91435212	91435713	.	0	.
chr13	119709438	119709939	.	0	.
chr6	7799852	7800353	.	0	.
chr8	47345383	47345884	.	0	.
chr2	31065939	31066440	.	0	.
chr12	109605157	109605658	.	0	.
chr8	25348226	25348727	.	0	.
chr12	109594880	109595381	.	0	.
chr8	83616503	83617004	.	0	.
chr14	70087852	70088353	.	0	.
chr1	154706149	154706650	.	0	.
chr4	136804891	136805392	.	0	.
chr15	83842914	83843415	.	0	.
chr16	94155281	94155782	.	0	.
chr19	7122863	7123364	.	0	.
chr15	86519415	86519916	.	0	.
chr8	92335589	92336090	.	0	.
chr2	163238485	163238986	.	0	.
chr9	67025403	67025904	.	0	.
chr7	110941288	110941789	.	0	.
chr3	108174126	108174627	.	0	.
chr4	135061735	135062236	.	0	.
chr5	134511918	134512419	.	0	.
chr17	26940995	26941496	.	0	.
chr2	34631566	34632067	.	0	.
chr7	132853328	132853829	.	0	.
chr2	168578249	168578750	.	0	.
chr18	5431804	5432305	.	0	.
chr11	59400045	59400546	.	0	.
chr9	23161304	23161805	.	0	.
chr17	83102588	83103089	.	0	.
chr7	110794168	110794669	.	0	.
chr15	84897930	84898431	.	0	.
chr7	100884168	100884669	.	0	.
chr19	9021444	9021945	.	0	.
chr7	67173588	67174089	.	0	.
chr4	154236838	154237339	.	0	.
chrX	16895022	16895523	.	0	.
chr17	24209826	24210327	.	0	.
chr5	118535126	118535627	.	0	.
chr18	82888527	82889028	.	0	.
chr14	54387677	54388178	.	0	.
chr15	101385007	101385508	.	0	.
chr5	30580667	30581168	.	0	.
chr3	9756376	9756877	.	0	.
chr5	93280264	93280765	.	0	.
chr12	31204173	31204674	.	0	.
chr13	16146568	16147069	.	0	.
chr17	10734982	10735483	.	0	.
chr1	131260696	131261197	.	0	.
chr1	180422848	180423349	.	0	.
chr4	137868151	137868652	.	0	.
chr11	119969780	119970281	.	0	.
chr7	40702423	40702924	.	0	.
chr15	89296318	89296819	.	0	.
chr5	65457117	65457618	.	0	.
chr1	90495095	90495596	.	0	.
chr13	104062221	104062722	.	0	.
chr12	9968827	9969328	.	0	.
chr2	90506012	90506513	.	0	.
chr17	47889098	47889599	.	0	.
chr1	119202380	119202881	.	0	.
chr17	29050429	29050930	.	0	.
chr7	142486084	142486585	.	0	.
chr2	45747901	45748402	.	0	.
chr1	38843226	38843727	.	0	.
chr2	168576305	168576806	.	0	.
chr17	79076937	79077438	.	0	.
chr3	66082038	66082539	.	0	.
chr3	121526613	121527114	.	0	.
chr6	135140749	135141250	.	0	.
chr10	127198954	127199455	.	0	.
chr8	25538130	25538631	.	0	.
chr17	14552133	14552634	.	0	.
chr3	88481309	88481810	.	0	.
chr3	144614781	144615282	.	0	.
chrX	11552205	11552706	.	0	.
chr10	92081772	92082273	.	0	.
chr11	117094150	117094651	.	0	.
chr17	29756231	29756732	.	0	.
chr5	25754295	25754796	.	0	.
chr6	128275408	128275909	.	0	.
chr5	124873946	124874447	.	0	.
chr14	120831267	120831768	.	0	.
chr14	66190778	66191279	.	0	.
chr7	66586535	66587036	.	0	.
chr11	85765635	85766136	.	0	.
chr12	103515227	103515728	.	0	.
chr7	35042033	35042534	.	0	.
chr10	122861957	122862458	.	0	.
chr9	58439979	58440480	.	0	.
chr9	51394329	51394830	.	0	.
chr13	51220821	51221322	.	0	.
chr9	115933282	115933783	.	0	.
chr4	57194158	57194659	.	0	.
chr10	75100259	75100760	.	0	.
chr9	61033311	61033812	.	0	.
chr13	97662707	97663208	.	0	.
chr8	120425634	120426135	.	0	.
chr18	62787128	62787629	.	0	.
chr6	126710719	126711220	.	0	.
chr9	61511368	61511869	.	0	.
chr3	101448921	101449422	.	0	.
chr5	111255988	111256489	.	0	.
chr9	79931067	79931568	.	0	.
chr4	130043477	130043978	.	0	.
chr9	35524346	35524847	.	0	.
chrX	74233824	74234325	.	0	.
chr1	76038994	76039495	.	0	.
chr4	117359687	117360188	.	0	.
chr5	32080194	32080695	.	0	.
chr9	35464847	35465348	.	0	.
chr13	54459009	54459510	.	0	.
chr17	14718676	14719177	.	0	.
chr12	106840110	106840611	.	0	.
chr14	67181648	67182149	.	0	.
chr8	70409287	70409788	.	0	.
chr4	72380232	72380733	.	0	.
chr4	47029083	47029584	.	0	.
chr1	164799071	164799572	.	0	.
chr12	29342660	29343161	.	0	.
chr4	117052529	117053030	.	0	.
[truncated: 7,860 more rows]

## Sheet: Macrophages.DAR
chr11	87749360	87749861	.	0	.
chr8	126849500	126850001	.	0	.
chr10	62543362	62543863	.	0	.
chr14	70056838	70057339	.	0	.
chr7	28382882	28383383	.	0	.
chr11	118145619	118146120	.	0	.
chr19	41339218	41339719	.	0	.
chr7	45238884	45239385	.	0	.
chr5	142794508	142795009	.	0	.
chr2	32714810	32715311	.	0	.
chr5	140617670	140618171	.	0	.
chr11	103178071	103178572	.	0	.
chr17	35262715	35263216	.	0	.
chr5	140616651	140617152	.	0	.
chr11	60935227	60935728	.	0	.
chr15	78244577	78245078	.	0	.
chr18	34856178	34856679	.	0	.
chr8	25067915	25068416	.	0	.
chr1	171388722	171389223	.	0	.
chr12	91766264	91766765	.	0	.
chr2	28539957	28540458	.	0	.
chr9	44986347	44986848	.	0	.
chr14	70065796	70066297	.	0	.
chr17	33978692	33979193	.	0	.
chr3	152912306	152912807	.	0	.
chr7	127091098	127091599	.	0	.
chr2	167656783	167657284	.	0	.
chr12	111159851	111160352	.	0	.
chr2	167753883	167754384	.	0	.
chr7	16207474	16207975	.	0	.
chr19	4300103	4300604	.	0	.
chr2	38536248	38536749	.	0	.
chr17	84116148	84116649	.	0	.
chr5	123128814	123129315	.	0	.
chr9	61702272	61702773	.	0	.
chr15	78572564	78573065	.	0	.
chr6	114893798	114894299	.	0	.
chr2	31082523	31083024	.	0	.
chr8	126847490	126847991	.	0	.
chr10	80678097	80678598	.	0	.
chr5	5420038	5420539	.	0	.
chr17	57290613	57291114	.	0	.
chr9	60999100	60999601	.	0	.
chr2	128294795	128295296	.	0	.
chr2	91082778	91083279	.	0	.
chr4	135069743	135070244	.	0	.
chr4	134081845	134082346	.	0	.
chr11	97829921	97830422	.	0	.
chr2	32917402	32917903	.	0	.
chr2	127335857	127336358	.	0	.
chr7	99536078	99536579	.	0	.
chr11	34783668	34784169	.	0	.
chr12	103341117	103341618	.	0	.
chr4	130913959	130914460	.	0	.
chr11	103174854	103175355	.	0	.
chr2	167775073	167775574	.	0	.
chr11	4232618	4233119	.	0	.
chr4	125124687	125125188	.	0	.
chr8	94365531	94366032	.	0	.
chr8	117074176	117074677	.	0	.
chr1	155050209	155050710	.	0	.
chr6	31126356	31126857	.	0	.
chr4	149702634	149703135	.	0	.
chr1	87626382	87626883	.	0	.
chr4	132075078	132075579	.	0	.
chr2	32715323	32715824	.	0	.
chr9	7872711	7873212	.	0	.
chr4	63399174	63399675	.	0	.
chr12	8521346	8521847	.	0	.
chr11	87755266	87755767	.	0	.
chr19	5724506	5725007	.	0	.
chr10	80075103	80075604	.	0	.
chr7	64011754	64012255	.	0	.
chr1	193201281	193201782	.	0	.
chr13	49242654	49243155	.	0	.
chr7	140947007	140947508	.	0	.
chr12	112629217	112629718	.	0	.
chr11	87748630	87749131	.	0	.
chr2	167368328	167368829	.	0	.
chr8	119423739	119424240	.	0	.
chr15	78258151	78258652	.	0	.
chr14	75179231	75179732	.	0	.
chr17	34000091	34000592	.	0	.
chr2	26483133	26483634	.	0	.
chr9	63706253	63706754	.	0	.
chr2	131509625	131510126	.	0	.
chr2	31061029	31061530	.	0	.
chr12	86833638	86834139	.	0	.
chr7	19316392	19316893	.	0	.
chr5	134232466	134232967	.	0	.
chr11	87756421	87756922	.	0	.
chr8	125067583	125068084	.	0	.
chr15	76204090	76204591	.	0	.
chr4	59331576	59332077	.	0	.
chr7	24457584	24458085	.	0	.
chr4	129496535	129497036	.	0	.
chr2	91947752	91948253	.	0	.
chr11	119925168	119925669	.	0	.
chr19	6299388	6299889	.	0	.
chr17	29395430	29395931	.	0	.
chr4	135120295	135120796	.	0	.
chr14	33185184	33185685	.	0	.
chr11	72953747	72954248	.	0	.
chr14	60736657	60737158	.	0	.
chr1	180403508	180404009	.	0	.
chr6	38354310	38354811	.	0	.
chr5	115516033	115516534	.	0	.
chr19	10841772	10842273	.	0	.
chr11	32542659	32543160	.	0	.
chr11	62576461	62576962	.	0	.
chr1	171390073	171390574	.	0	.
chr6	87502819	87503320	.	0	.
chr17	35200410	35200911	.	0	.
chr3	105892224	105892725	.	0	.
chr7	128392264	128392765	.	0	.
chr11	115153821	115154322	.	0	.
chr2	32495246	32495747	.	0	.
chr5	113830209	113830710	.	0	.
chr5	125052108	125052609	.	0	.
chr7	88277805	88278306	.	0	.
chr7	101382232	101382733	.	0	.
chr11	34782990	34783491	.	0	.
chr15	73140101	73140602	.	0	.
chr17	47768615	47769116	.	0	.
chr11	117832008	117832509	.	0	.
chr7	98534323	98534824	.	0	.
chr7	125555421	125555922	.	0	.
chr11	87751453	87751954	.	0	.
chr8	13594720	13595221	.	0	.
chr5	111178472	111178973	.	0	.
chr11	97825182	97825683	.	0	.
chr12	54998999	54999500	.	0	.
chr12	79646528	79647029	.	0	.
chr12	86834355	86834856	.	0	.
chr16	84583762	84584263	.	0	.
chr4	135206224	135206725	.	0	.
chr6	91712766	91713267	.	0	.
chr8	126805859	126806360	.	0	.
chr7	45082997	45083498	.	0	.
chr11	109419776	109420277	.	0	.
chr17	70852210	70852711	.	0	.
chr1	131199922	131200423	.	0	.
chr8	122473822	122474323	.	0	.
chr10	80695164	80695665	.	0	.
chr13	37619707	37620208	.	0	.
chr8	119784185	119784686	.	0	.
chr7	25689106	25689607	.	0	.
chr7	126584637	126585138	.	0	.
chr4	145240930	145241431	.	0	.
chr17	30518820	30519321	.	0	.
chr1	128712726	128713227	.	0	.
chr1	191281152	191281653	.	0	.
chr16	11456341	11456842	.	0	.
chr2	165982955	165983456	.	0	.
chr2	172400943	172401444	.	0	.
chr9	60998583	60999084	.	0	.
chr19	6297629	6298130	.	0	.
chr7	24387202	24387703	.	0	.
chr17	29394146	29394647	.	0	.
chr4	129032660	129033161	.	0	.
chr15	100706282	100706783	.	0	.
chr9	61013172	61013673	.	0	.
chr19	9938574	9939075	.	0	.
chr17	88132812	88133313	.	0	.
chr4	125127625	125128126	.	0	.
chr5	115516580	115517081	.	0	.
chr2	151973237	151973738	.	0	.
chr4	59260982	59261483	.	0	.
chr5	113164818	113165319	.	0	.
chr11	117991688	117992189	.	0	.
chr9	65541605	65542106	.	0	.
chr15	99030013	99030514	.	0	.
chr11	116077383	116077884	.	0	.
chr2	165982394	165982895	.	0	.
chr9	110676589	110677090	.	0	.
chr2	25422574	25423075	.	0	.
chr12	111442343	111442844	.	0	.
chr7	80074766	80075267	.	0	.
chr17	70852856	70853357	.	0	.
chr2	122652276	122652777	.	0	.
chr10	117860870	117861371	.	0	.
chr14	40947634	40948135	.	0	.
chr15	101262386	101262887	.	0	.
chr17	57278881	57279382	.	0	.
chr2	158719095	158719596	.	0	.
chr3	84681579	84682080	.	0	.
chr4	132563950	132564451	.	0	.
chr7	139974192	139974693	.	0	.
chr8	117287788	117288289	.	0	.
chr7	139971368	139971869	.	0	.
chr13	20184978	20185479	.	0	.
chr1	36273310	36273811	.	0	.
chr19	4294346	4294847	.	0	.
chr18	62179796	62180297	.	0	.
chr7	30413521	30414022	.	0	.
chr19	53423214	53423715	.	0	.
chr8	11463928	11464429	.	0	.
chr13	49309027	49309528	.	0	.
chr6	72140236	72140737	.	0	.
chr2	69380282	69380783	.	0	.
chr3	131642873	131643374	.	0	.
chr1	152807503	152808004	.	0	.
chr2	180276677	180277178	.	0	.
chr16	89972988	89973489	.	0	.
chr6	120452982	120453483	.	0	.
chr7	31041910	31042411	.	0	.
chr8	25601331	25601832	.	0	.
chr11	53794753	53795254	.	0	.
chr12	112860693	112861194	.	0	.
chr7	30419384	30419885	.	0	.
chr17	84118136	84118637	.	0	.
chr1	153085141	153085642	.	0	.
chr4	150924344	150924845	.	0	.
chr6	145306586	145307087	.	0	.
chr17	46073802	46074303	.	0	.
chr1	134093698	134094199	.	0	.
chr19	46863415	46863916	.	0	.
chr13	49187817	49188318	.	0	.
chr8	121570208	121570709	.	0	.
chr7	19265827	19266328	.	0	.
chr5	139404872	139405373	.	0	.
chr8	126867644	126868145	.	0	.
chr5	124074831	124075332	.	0	.
chr13	43765219	43765720	.	0	.
chr4	125145189	125145690	.	0	.
chr8	126852177	126852678	.	0	.
chr1	13660323	13660824	.	0	.
chr11	118211657	118212158	.	0	.
chr4	119127112	119127613	.	0	.
chr7	30422001	30422502	.	0	.
chr1	182254621	182255122	.	0	.
chr16	38403576	38404077	.	0	.
chr6	54162777	54163278	.	0	.
chr7	80387688	80388189	.	0	.
chr9	65542203	65542704	.	0	.
chr17	84181537	84182038	.	0	.
chr17	84119809	84120310	.	0	.
chr4	141870926	141871427	.	0	.
chr2	158175344	158175845	.	0	.
chr2	167589241	167589742	.	0	.
chr17	27555756	27556257	.	0	.
chr2	35495433	35495934	.	0	.
chr2	38481086	38481587	.	0	.
chr15	103453516	103454017	.	0	.
chr19	7019250	7019751	.	0	.
chr4	140944821	140945322	.	0	.
chr5	117133323	117133824	.	0	.
chr13	101540372	101540873	.	0	.
chr17	35870218	35870719	.	0	.
chr19	46339119	46339620	.	0	.
chr12	25240078	25240579	.	0	.
chr1	87640220	87640721	.	0	.
chr11	117334041	117334542	.	0	.
chr10	77536664	77537165	.	0	.
chr17	29393618	29394119	.	0	.
chr12	113168127	113168628	.	0	.
chr10	78297981	78298482	.	0	.
chr14	25857185	25857686	.	0	.
chr16	92801470	92801971	.	0	.
chr8	122430211	122430712	.	0	.
chr15	77800523	77801024	.	0	.
chr11	87749890	87750391	.	0	.
chr16	91366578	91367079	.	0	.
chr18	73541940	73542441	.	0	.
chr4	47303205	47303706	.	0	.
chr4	152448520	152449021	.	0	.
chr5	34196432	34196933	.	0	.
chr5	135537264	135537765	.	0	.
chr5	149266807	149267308	.	0	.
chr8	106058571	106059072	.	0	.
chr17	26605481	26605982	.	0	.
chr2	167492648	167493149	.	0	.
chr19	53464637	53465138	.	0	.
chr7	128392831	128393332	.	0	.
chr2	32867322	32867823	.	0	.
chr18	82525733	82526234	.	0	.
chr3	83841314	83841815	.	0	.
chr5	148495227	148495728	.	0	.
chr14	66257548	66258049	.	0	.
chr10	82899882	82900383	.	0	.
chr11	33938886	33939387	.	0	.
chr5	53490708	53491209	.	0	.
chr19	47133042	47133543	.	0	.
chr1	181860598	181861099	.	0	.
chr10	17772394	17772895	.	0	.
chr12	72844074	72844575	.	0	.
chr7	125603216	125603717	.	0	.
chr10	81297813	81298314	.	0	.
chr17	84140784	84141285	.	0	.
chr1	87620103	87620604	.	0	.
chr11	98933154	98933655	.	0	.
chr3	90586825	90587326	.	0	.
chr9	57339784	57340285	.	0	.
chr10	79780556	79781057	.	0	.
chr17	35218752	35219253	.	0	.
chr6	87540953	87541454	.	0	.
chr2	174437739	174438240	.	0	.
chr6	124732889	124733390	.	0	.
chr11	69098503	69099004	.	0	.
chr3	105894640	105895141	.	0	.
chr9	45245956	45246457	.	0	.
chr11	97728159	97728660	.	0	.
chr5	125106133	125106634	.	0	.
chr19	53424528	53425029	.	0	.
chr16	92825313	92825814	.	0	.
chr18	65381678	65382179	.	0	.
chr2	101763049	101763550	.	0	.
chr17	56443303	56443804	.	0	.
chr7	92874961	92875462	.	0	.
chr17	70851537	70852038	.	0	.
chr9	108120677	108121178	.	0	.
chr8	126850057	126850558	.	0	.
chr1	172513792	172514293	.	0	.
chr14	79301344	79301845	.	0	.
chr10	13982821	13983322	.	0	.
chr1	91080170	91080671	.	0	.
chr15	31349872	31350373	.	0	.
chr2	167649153	167649654	.	0	.
chr11	75571216	75571717	.	0	.
chr18	61108379	61108880	.	0	.
chr13	43268946	43269447	.	0	.
chr18	77837391	77837892	.	0	.
chr4	135080321	135080822	.	0	.
chr8	84982137	84982638	.	0	.
chr2	153084090	153084591	.	0	.
chr5	110807689	110808190	.	0	.
chr1	86263515	86264016	.	0	.
chr15	80896704	80897205	.	0	.
chr16	91869474	91869975	.	0	.
chr16	93028570	93029071	.	0	.
chr17	29431979	29432480	.	0	.
chr2	75763162	75763663	.	0	.
chr3	87846790	87847291	.	0	.
chr6	124901002	124901503	.	0	.
chr10	80016381	80016882	.	0	.
chr15	103370357	103370858	.	0	.
chr16	89986082	89986583	.	0	.
chr1	88587253	88587754	.	0	.
chr11	95688357	95688858	.	0	.
chr8	120538567	120539068	.	0	.
chr17	26514634	26515135	.	0	.
chr1	87637452	87637953	.	0	.
chr16	22119488	22119989	.	0	.
chr14	48422039	48422540	.	0	.
chr8	83748642	83749143	.	0	.
chr16	93816318	93816819	.	0	.
chr11	117780442	117780943	.	0	.
chr15	78571569	78572070	.	0	.
chr17	35210165	35210666	.	0	.
chr6	87542017	87542518	.	0	.
chr1	74374985	74375486	.	0	.
chr5	142909066	142909567	.	0	.
chr2	158132999	158133500	.	0	.
chr9	110645176	110645677	.	0	.
chr5	117158645	117159146	.	0	.
chr2	73485260	73485761	.	0	.
chr11	76587923	76588424	.	0	.
chr5	115534877	115535378	.	0	.
chr14	70175680	70176181	.	0	.
chr15	99029501	99030002	.	0	.
chr1	37491676	37492177	.	0	.
chr11	5949524	5950025	.	0	.
chr11	43385269	43385770	.	0	.
chr12	91765534	91766035	.	0	.
chr13	73803692	73804193	.	0	.
chr13	95988070	95988571	.	0	.
chr13	113600988	113601489	.	0	.
chr15	86182697	86183198	.	0	.
chr16	24151125	24151626	.	0	.
chr19	10740623	10741124	.	0	.
chr4	133625412	133625913	.	0	.
chr4	135079793	135080294	.	0	.
chr6	87534802	87535303	.	0	.
chr8	70341874	70342375	.	0	.
chr9	45944916	45945417	.	0	.
chr9	107334094	107334595	.	0	.
chr15	77945655	77946156	.	0	.
chr6	17065522	17066023	.	0	.
chr3	31095373	31095874	.	0	.
chr4	130913039	130913540	.	0	.
chr1	135132365	135132866	.	0	.
chr18	80608338	80608839	.	0	.
chr4	47251084	47251585	.	0	.
chr9	107640076	107640577	.	0	.
chr14	25640357	25640858	.	0	.
chr4	133872784	133873285	.	0	.
chr14	70175158	70175659	.	0	.
chr2	29672849	29673350	.	0	.
chr4	149856329	149856830	.	0	.
chr6	120915149	120915650	.	0	.
chr2	128428470	128428971	.	0	.
chr9	96649836	96650337	.	0	.
chr12	102295288	102295789	.	0	.
chr5	43233563	43234064	.	0	.
chr3	88513346	88513847	.	0	.
chr16	32176861	32177362	.	0	.
chr19	41332172	41332673	.	0	.
chr7	126285193	126285694	.	0	.
chr7	25632593	25633094	.	0	.
chr3	95645258	95645759	.	0	.
chr15	78607438	78607939	.	0	.
chr5	118404308	118404809	.	0	.
chr17	71598529	71599030	.	0	.
chr4	149657911	149658412	.	0	.
chr7	46606900	46607401	.	0	.
chr9	107629027	107629528	.	0	.
chr15	78457051	78457552	.	0	.
chr15	78495029	78495530	.	0	.
chr17	84004216	84004717	.	0	.
chr14	14346054	14346555	.	0	.
chr18	80611707	80612208	.	0	.
chr4	139198970	139199471	.	0	.
chr5	136171338	136171839	.	0	.
chr8	3353348	3353849	.	0	.
chr7	141096679	141097180	.	0	.
chr6	86570783	86571284	.	0	.
chr10	19691817	19692318	.	0	.
chr11	97142005	97142506	.	0	.
chr16	92867358	92867859	.	0	.
chr17	7874680	7875181	.	0	.
chr17	35219363	35219864	.	0	.
chr19	5572386	5572887	.	0	.
chr2	32493174	32493675	.	0	.
chr2	155979259	155979760	.	0	.
chr3	103859780	103860281	.	0	.
chr4	46563783	46564284	.	0	.
chr5	64960784	64961285	.	0	.
chr7	30420103	30420604	.	0	.
chr7	127296082	127296583	.	0	.
chr9	108104704	108105205	.	0	.
chr10	122814986	122815487	.	0	.
chr8	120332592	120333093	.	0	.
chr9	61666050	61666551	.	0	.
chr6	144902469	144902970	.	0	.
chr4	134098649	134099150	.	0	.
chr6	136941204	136941705	.	0	.
chr2	91096465	91096966	.	0	.
chr4	132976522	132977023	.	0	.
chr12	108765712	108766213	.	0	.
chr1	87621342	87621843	.	0	.
chr2	128429172	128429673	.	0	.
chr16	4912914	4913415	.	0	.
chr17	26497248	26497749	.	0	.
chr1	180365111	180365612	.	0	.
chr17	55952357	55952858	.	0	.
chr10	96370954	96371455	.	0	.
chr15	25842936	25843437	.	0	.
chr11	76587217	76587718	.	0	.
chr8	70806481	70806982	.	0	.
chr17	29094193	29094694	.	0	.
chr13	43250540	43251041	.	0	.
chr5	140597138	140597639	.	0	.
chr2	167754741	167755242	.	0	.
chr5	35728850	35729351	.	0	.
chr15	97360929	97361430	.	0	.
chr8	25102787	25103288	.	0	.
chr8	27174454	27174955	.	0	.
chr9	63716087	63716588	.	0	.
chr2	174436220	174436721	.	0	.
chr7	38214847	38215348	.	0	.
chr16	91355120	91355621	.	0	.
chr17	34101455	34101956	.	0	.
chr3	95293566	95294067	.	0	.
chr12	76537429	76537930	.	0	.
chr1	92064183	92064684	.	0	.
chr10	127162798	127163299	.	0	.
chr10	127631798	127632299	.	0	.
chr14	70333589	70334090	.	0	.
chr15	85982093	85982594	.	0	.
chr19	5711886	5712387	.	0	.
chr2	24385060	24385561	.	0	.
chr2	150673805	150674306	.	0	.
chr2	157447108	157447609	.	0	.
chr10	75326439	75326940	.	0	.
chr8	34622619	34623120	.	0	.
chr7	80404055	80404556	.	0	.
chr13	49205665	49206166	.	0	.
chr6	72548939	72549440	.	0	.
chr19	41344876	41345377	.	0	.
chr19	47510380	47510881	.	0	.
chr5	8798370	8798871	.	0	.
chr8	70001498	70001999	.	0	.
chr17	6007915	6008416	.	0	.
chr1	164135275	164135776	.	0	.
chr11	73024409	73024910	.	0	.
chr2	163229091	163229592	.	0	.
chr1	78537495	78537996	.	0	.
chr17	84119078	84119579	.	0	.
chr1	135132878	135133379	.	0	.
chr8	117198006	117198507	.	0	.
chr3	65958010	65958511	.	0	.
chr16	32165318	32165819	.	0	.
chr8	111595710	111596211	.	0	.
chr19	7017711	7018212	.	0	.
chr8	71296289	71296790	.	0	.
chr8	122432710	122433211	.	0	.
chr10	93124211	93124712	.	0	.
chr1	167242132	167242633	.	0	.
chr18	60499946	60500447	.	0	.
chr7	45238365	45238866	.	0	.
chr9	120054814	120055315	.	0	.
chr12	100903756	100904257	.	0	.
chr10	19062011	19062512	.	0	.
chr17	57078259	57078760	.	0	.
chr11	80489661	80490162	.	0	.
chr2	119350818	119351319	.	0	.
chr16	92620652	92621153	.	0	.
chr4	125116495	125116996	.	0	.
chr8	105685902	105686403	.	0	.
chr10	44380396	44380897	.	0	.
chr10	122800182	122800683	.	0	.
chr10	127074986	127075487	.	0	.
chr10	127323371	127323872	.	0	.
chr11	5150794	5151295	.	0	.
chr11	61653033	61653534	.	0	.
chr11	100814394	100814895	.	0	.
chr11	120938785	120939286	.	0	.
chr12	91668411	91668912	.	0	.
chr13	41486830	41487331	.	0	.
chr14	47361903	47362404	.	0	.
chr15	78245232	78245733	.	0	.
chr16	11455678	11456179	.	0	.
chr16	92825823	92826324	.	0	.
chr18	60638117	60638618	.	0	.
chr19	5571743	5572244	.	0	.
chr2	173349360	173349861	.	0	.
chr4	59265063	59265564	.	0	.
chr4	118999596	119000097	.	0	.
chr5	37067204	37067705	.	0	.
chr6	65144490	65144991	.	0	.
chr6	89421463	89421964	.	0	.
chr7	75892660	75893161	.	0	.
chr8	71723111	71723612	.	0	.
chr8	122700672	122701173	.	0	.
chr9	73089439	73089940	.	0	.
chr9	119743856	119744357	.	0	.
chr4	134762344	134762845	.	0	.
chr8	105345019	105345520	.	0	.
chr9	32507377	32507878	.	0	.
chr15	96641369	96641870	.	0	.
chr12	25208833	25209334	.	0	.
chr11	58928297	58928798	.	0	.
chr4	140566702	140567203	.	0	.
chr7	101466109	101466610	.	0	.
chr2	153543860	153544361	.	0	.
chr15	96638186	96638687	.	0	.
chr19	10738710	10739211	.	0	.
chr15	99030534	99031035	.	0	.
chr2	178505956	178506457	.	0	.
chr12	112619732	112620233	.	0	.
chr11	97435735	97436236	.	0	.
chr7	100950405	100950906	.	0	.
chr9	110653994	110654495	.	0	.
chr9	15018053	15018554	.	0	.
chr4	62629843	62630344	.	0	.
chr8	126848569	126849070	.	0	.
chr1	181247058	181247559	.	0	.
chr12	73779134	73779635	.	0	.
chr4	140983336	140983837	.	0	.
chr17	83312335	83312836	.	0	.
chr6	120473391	120473892	.	0	.
chr19	53273939	53274440	.	0	.
chr7	28781129	28781630	.	0	.
chr7	143042795	143043296	.	0	.
chr7	28865871	28866372	.	0	.
chr8	120489260	120489761	.	0	.
chr2	30626202	30626703	.	0	.
chr9	70838460	70838961	.	0	.
chr2	167318851	167319352	.	0	.
chr5	21411132	21411633	.	0	.
chr7	142340483	142340984	.	0	.
chr4	135314207	135314708	.	0	.
chr11	79076404	79076905	.	0	.
chr2	90490601	90491102	.	0	.
chr12	82225814	82226315	.	0	.
chr4	134116955	134117456	.	0	.
chr9	63737328	63737829	.	0	.
chr2	167588595	167589096	.	0	.
chr1	54841740	54842241	.	0	.
chr10	22306412	22306913	.	0	.
chr10	76542955	76543456	.	0	.
chr11	34063935	34064436	.	0	.
chr11	95688898	95689399	.	0	.
chr11	104424932	104425433	.	0	.
chr15	81021398	81021899	.	0	.
chr15	86224975	86225476	.	0	.
chr16	36709408	36709909	.	0	.
chr19	41331623	41332124	.	0	.
chr2	93424691	93425192	.	0	.
chr2	173469672	173470173	.	0	.
chr2	174613918	174614419	.	0	.
chr3	152912848	152913349	.	0	.
chr4	119125831	119126332	.	0	.
chr4	119977854	119978355	.	0	.
chr4	135193017	135193518	.	0	.
chr5	113841845	113842346	.	0	.
chr5	149267401	149267902	.	0	.
chr6	39379177	39379678	.	0	.
chr6	50377585	50378086	.	0	.
chr6	120567454	120567955	.	0	.
chr9	44645948	44646449	.	0	.
chr9	64089027	64089528	.	0	.
chr9	107333546	107334047	.	0	.
chr1	181232573	181233074	.	0	.
chr11	79023353	79023854	.	0	.
chr19	53421073	53421574	.	0	.
chr1	128592127	128592628	.	0	.
chr13	51734487	51734988	.	0	.
chr4	129032128	129032629	.	0	.
chr5	148820356	148820857	.	0	.
chr1	85703473	85703974	.	0	.
chr15	5244024	5244525	.	0	.
chr9	107289606	107290107	.	0	.
chr2	25194575	25195076	.	0	.
chr9	107624515	107625016	.	0	.
chr8	24725486	24725987	.	0	.
chr5	113644231	113644732	.	0	.
chr11	83640031	83640532	.	0	.
chr15	86067495	86067996	.	0	.
chr10	79937032	79937533	.	0	.
chr2	164521659	164522160	.	0	.
chr5	149274754	149275255	.	0	.
chr17	25248007	25248508	.	0	.
chr11	87754527	87755028	.	0	.
chr1	135659353	135659854	.	0	.
chr15	103258253	103258754	.	0	.
chr5	113944822	113945323	.	0	.
chr2	91183762	91184263	.	0	.
chr15	80681267	80681768	.	0	.
chr5	120775173	120775674	.	0	.
chr5	140517099	140517600	.	0	.
chr7	43643151	43643652	.	0	.
chr3	89233421	89233922	.	0	.
chr8	122556558	122557059	.	0	.
chr11	67588838	67589339	.	0	.
chr11	116616690	116617191	.	0	.
chr2	167759876	167760377	.	0	.
chr3	69205666	69206167	.	0	.
chr14	75069246	75069747	.	0	.
chr8	88635877	88636378	.	0	.
chr10	128636929	128637430	.	0	.
chr17	84116726	84117227	.	0	.
chr5	130001258	130001759	.	0	.
chr12	84285010	84285511	.	0	.
chr4	135313706	135314207	.	0	.
chr1	64301084	64301585	.	0	.
chr10	111539788	111540289	.	0	.
chr1	154034104	154034605	.	0	.
chr2	91971986	91972487	.	0	.
chr12	84243072	84243573	.	0	.
chr14	50833970	50834471	.	0	.
chr6	89280511	89281012	.	0	.
chr11	79118752	79119253	.	0	.
chr4	134548031	134548532	.	0	.
chr5	134229360	134229861	.	0	.
chr7	80426237	80426738	.	0	.
chr8	3630854	3631355	.	0	.
chr6	124723487	124723988	.	0	.
chr8	14891255	14891756	.	0	.
chr9	61707791	61708292	.	0	.
chr1	37586040	37586541	.	0	.
chr17	43137820	43138321	.	0	.
chr9	44537571	44538072	.	0	.
chr2	11653332	11653833	.	0	.
chr8	72169195	72169696	.	0	.
chr1	131276757	131277258	.	0	.
chr1	170709497	170709998	.	0	.
chr11	79640826	79641327	.	0	.
chr11	115133721	115134222	.	0	.
chr12	100994393	100994894	.	0	.
chr15	19857300	19857801	.	0	.
chr15	59105831	59106332	.	0	.
chr15	101374841	101375342	.	0	.
chr16	91789823	91790324	.	0	.
chr17	86732000	86732501	.	0	.
chr19	57132218	57132719	.	0	.
chr2	38483030	38483531	.	0	.
chr2	93428004	93428505	.	0	.
chr2	128373933	128374434	.	0	.
chr2	129586014	129586515	.	0	.
chr2	167949161	167949662	.	0	.
chr4	32363673	32364174	.	0	.
chr4	62681313	62681814	.	0	.
chr4	133614267	133614768	.	0	.
chr4	135097841	135098342	.	0	.
chr6	91706069	91706570	.	0	.
chr7	25132282	25132783	.	0	.
chr8	70768178	70768679	.	0	.
chr8	125068148	125068649	.	0	.
chr8	126804048	126804549	.	0	.
chr9	41105076	41105577	.	0	.
chr9	107280446	107280947	.	0	.
chr8	27175056	27175557	.	0	.
chr4	145254392	145254893	.	0	.
chr7	132735095	132735596	.	0	.
chr14	70577490	70577991	.	0	.
chr9	63602252	63602753	.	0	.
chrX	74243630	74244131	.	0	.
chr4	32250171	32250672	.	0	.
chr7	99428883	99429384	.	0	.
chr17	84145801	84146302	.	0	.
chr11	118212699	118213200	.	0	.
chr17	80564445	80564946	.	0	.
chr8	126757884	126758385	.	0	.
chr2	3657846	3658347	.	0	.
chr11	95834405	95834906	.	0	.
chr15	76192614	76193115	.	0	.
chr19	9974876	9975377	.	0	.
chr5	113872147	113872648	.	0	.
chr8	88662160	88662661	.	0	.
chr11	4236154	4236655	.	0	.
chr1	136141449	136141950	.	0	.
chr9	41073499	41074000	.	0	.
chr12	99468010	99468511	.	0	.
chr14	75844853	75845354	.	0	.
chr11	76479558	76480059	.	0	.
chr2	32608413	32608914	.	0	.
chr5	148399089	148399590	.	0	.
chr17	12754614	12755115	.	0	.
chr5	113672418	113672919	.	0	.
chr9	63737942	63738443	.	0	.
chr13	13529099	13529600	.	0	.
chr5	113162902	113163403	.	0	.
chr13	111935938	111936439	.	0	.
chr11	96943843	96944344	.	0	.
chr19	4097647	4098148	.	0	.
chr17	84844843	84845344	.	0	.
chr7	31115408	31115909	.	0	.
chr2	91965455	91965956	.	0	.
chr5	124075630	124076131	.	0	.
chr7	43642580	43643081	.	0	.
chr9	116366156	116366657	.	0	.
chr5	104046546	104047047	.	0	.
chr16	77013328	77013829	.	0	.
chr18	11931570	11932071	.	0	.
chr10	78087012	78087513	.	0	.
chr15	27873680	27874181	.	0	.
chr2	129595567	129596068	.	0	.
chr8	119436853	119437354	.	0	.
chr11	115189202	115189703	.	0	.
chr12	112864773	112865274	.	0	.
chr3	131208369	131208870	.	0	.
chr19	5844976	5845477	.	0	.
chr8	3355452	3355953	.	0	.
chr8	120686066	120686567	.	0	.
chr8	122349833	122350334	.	0	.
chr7	28808097	28808598	.	0	.
chr8	35430583	35431084	.	0	.
chr12	105012983	105013484	.	0	.
chr10	80017322	80017823	.	0	.
chr4	132982970	132983471	.	0	.
chr10	111516253	111516754	.	0	.
chr8	14961372	14961873	.	0	.
chr10	81298692	81299193	.	0	.
chr17	28015368	28015869	.	0	.
chr10	81507859	81508360	.	0	.
chr15	67116681	67117182	.	0	.
chr13	49191543	49192044	.	0	.
chr17	57289973	57290474	.	0	.
chr13	51740679	51741180	.	0	.
chr3	79531923	79532424	.	0	.
chr10	42860436	42860937	.	0	.
chr2	167363383	167363884	.	0	.
chr6	145276106	145276607	.	0	.
chr1	135268000	135268501	.	0	.
chr11	59541204	59541705	.	0	.
chr12	104990657	104991158	.	0	.
chr13	49196785	49197286	.	0	.
chr13	55369724	55370225	.	0	.
chr15	86168037	86168538	.	0	.
chr15	101485920	101486421	.	0	.
chr16	3723167	3723668	.	0	.
chr16	43698862	43699363	.	0	.
chr16	90475658	90476159	.	0	.
chr17	5801957	5802458	.	0	.
chr17	31223847	31224348	.	0	.
chr18	80738104	80738605	.	0	.
chr19	36375318	36375819	.	0	.
chr2	6478307	6478808	.	0	.
chr2	167351339	167351840	.	0	.
chr4	32258091	32258592	.	0	.
chr4	59264533	59265034	.	0	.
chr4	86874068	86874569	.	0	.
chr4	152078052	152078553	.	0	.
chr5	30650706	30651207	.	0	.
chr7	16204762	16205263	.	0	.
chr7	30417886	30418387	.	0	.
chr7	31111072	31111573	.	0	.
chr7	117394103	117394604	.	0	.
chr7	139984500	139985001	.	0	.
chr8	104110767	104111268	.	0	.
chr8	119825930	119826431	.	0	.
chr9	69034126	69034627	.	0	.
chr9	121674874	121675375	.	0	.
chr11	97434985	97435486	.	0	.
chr6	143115092	143115593	.	0	.
chr12	110851274	110851775	.	0	.
chr4	152153728	152154229	.	0	.
chr15	103333604	103334105	.	0	.
chr5	137631086	137631587	.	0	.
chr9	61669559	61670060	.	0	.
chr19	29241527	29242028	.	0	.
chr9	56104296	56104797	.	0	.
chr4	142017727	142018228	.	0	.
chr10	96333186	96333687	.	0	.
chr11	98458099	98458600	.	0	.
chr12	112917386	112917887	.	0	.
chr2	153542924	153543425	.	0	.
chr5	142920676	142921177	.	0	.
chr8	36122429	36122930	.	0	.
chr10	78134802	78135303	.	0	.
chr11	97994512	97995013	.	0	.
chr5	140642050	140642551	.	0	.
chr2	29624246	29624747	.	0	.
chr1	87620773	87621274	.	0	.
chr15	89078120	89078621	.	0	.
chr11	74837533	74838034	.	0	.
chr13	74259702	74260203	.	0	.
chr9	61056627	61057128	.	0	.
chr4	106804137	106804638	.	0	.
chr18	10532824	10533325	.	0	.
chr18	7626680	7627181	.	0	.
chr12	36042285	36042786	.	0	.
chr11	106158996	106159497	.	0	.
chr19	5815784	5816285	.	0	.
chr17	23610356	23610857	.	0	.
chr6	34875158	34875659	.	0	.
chr10	94828480	94828981	.	0	.
chr6	67375845	67376346	.	0	.
chr19	53273314	53273815	.	0	.
chr5	25529468	25529969	.	0	.
chr1	180404285	180404786	.	0	.
chr14	54227330	54227831	.	0	.
chr2	172393505	172394006	.	0	.
chr4	155163134	155163635	.	0	.
chr7	100855785	100856286	.	0	.
chr5	21185967	21186468	.	0	.
chr1	64078632	64079133	.	0	.
chr17	31038385	31038886	.	0	.
chr4	132494460	132494961	.	0	.
chr7	75610323	75610824	.	0	.
chr7	110796644	110797145	.	0	.
chr4	135898353	135898854	.	0	.
chr8	35376365	35376866	.	0	.
chr15	5244637	5245138	.	0	.
chr16	92821904	92822405	.	0	.
chr17	29394755	29395256	.	0	.
chr7	49093509	49094010	.	0	.
chr12	73598148	73598649	.	0	.
chr6	113654980	113655481	.	0	.
chr15	78563920	78564421	.	0	.
chr7	80864785	80865286	.	0	.
chr2	151972667	151973168	.	0	.
chr1	181230656	181231157	.	0	.
chr7	30394312	30394813	.	0	.
chr15	25843453	25843954	.	0	.
chr4	115857194	115857695	.	0	.
chr4	124695745	124696246	.	0	.
chr8	117074771	117075272	.	0	.
chr9	78480777	78481278	.	0	.
chr15	76299413	76299914	.	0	.
chr4	139307812	139308313	.	0	.
chr8	109750620	109751121	.	0	.
chr9	63720820	63721321	.	0	.
chr11	34009704	34010205	.	0	.
chr14	74847588	74848089	.	0	.
chr15	27702579	27703080	.	0	.
chr17	47766307	47766808	.	0	.
chr2	158166567	158167068	.	0	.
chr17	35259028	35259529	.	0	.
chr4	135203279	135203780	.	0	.
chr17	32402768	32403269	.	0	.
chr6	86607510	86608011	.	0	.
chr10	44458448	44458949	.	0	.
chr12	111441568	111442069	.	0	.
chr19	24166334	24166835	.	0	.
chr8	126832493	126832994	.	0	.
chr16	95827323	95827824	.	0	.
chr18	82471794	82472295	.	0	.
chr2	91183073	91183574	.	0	.
chr10	83004331	83004832	.	0	.
chr2	128125728	128126229	.	0	.
chr1	171234091	171234592	.	0	.
chr10	59980652	59981153	.	0	.
chr11	52318254	52318755	.	0	.
chr11	75541150	75541651	.	0	.
chr11	106752029	106752530	.	0	.
chr11	115188659	115189160	.	0	.
chr11	121804604	121805105	.	0	.
chr12	78980647	78981148	.	0	.
chr12	103343431	103343932	.	0	.
chr12	112761905	112762406	.	0	.
chr14	77904096	77904597	.	0	.
chr17	26532383	26532884	.	0	.
chr17	26571253	26571754	.	0	.
chr17	28211702	28212203	.	0	.
chr18	50028172	50028673	.	0	.
chr18	57249340	57249841	.	0	.
chr18	77796053	77796554	.	0	.
chr19	46655610	46656111	.	0	.
chr2	60172495	60172996	.	0	.
chr2	132019264	132019765	.	0	.
chr2	151974110	151974611	.	0	.
chr2	157063303	157063804	.	0	.
chr3	131057227	131057728	.	0	.
chr3	132871343	132871844	.	0	.
chr4	133843005	133843506	.	0	.
chr4	140872041	140872542	.	0	.
chr5	32077188	32077689	.	0	.
chr5	65900902	65901403	.	0	.
chr6	99388629	99389130	.	0	.
chr6	113661402	113661903	.	0	.
chr6	117900054	117900555	.	0	.
chr7	28440782	28441283	.	0	.
chr9	32500854	32501355	.	0	.
chr9	61963322	61963823	.	0	.
chr9	120043197	120043698	.	0	.
chr7	80209696	80210197	.	0	.
chr12	102646483	102646984	.	0	.
chr8	106054151	106054652	.	0	.
chr17	29437034	29437535	.	0	.
chr6	117431416	117431917	.	0	.
chr2	164942850	164943351	.	0	.
chr7	143005292	143005793	.	0	.
chr5	130171455	130171956	.	0	.
chr3	31061013	31061514	.	0	.
chr2	91086215	91086716	.	0	.
chr5	124050029	124050530	.	0	.
chr11	52076255	52076756	.	0	.
chr11	119933648	119934149	.	0	.
chr14	25517117	25517618	.	0	.
chr5	130000731	130001232	.	0	.
chr15	73161997	73162498	.	0	.
chr17	33555445	33555946	.	0	.
chr7	80387165	80387666	.	0	.
chr9	57640380	57640881	.	0	.
chr11	52268134	52268635	.	0	.
chr15	81045298	81045799	.	0	.
chr8	108723102	108723603	.	0	.
chr17	31834564	31835065	.	0	.
chr6	124738512	124739013	.	0	.
chr14	47374217	47374718	.	0	.
chr10	84774528	84775029	.	0	.
chr4	133625921	133626422	.	0	.
chr12	69447886	69448387	.	0	.
chr15	78879084	78879585	.	0	.
chr7	80779183	80779684	.	0	.
chr17	28014847	28015348	.	0	.
chr17	57193892	57194393	.	0	.
chr12	85629597	85630098	.	0	.
chr11	86578908	86579409	.	0	.
chr15	12010208	12010709	.	0	.
chr16	32113523	32114024	.	0	.
chr3	27182676	27183177	.	0	.
chr12	102652422	102652923	.	0	.
chr13	80885402	80885903	.	0	.
chr6	113644761	113645262	.	0	.
chr6	125071275	125071776	.	0	.
chr8	122547632	122548133	.	0	.
chr17	29095317	29095818	.	0	.
chr1	128590701	128591202	.	0	.
chr11	116423927	116424428	.	0	.
chr4	140947862	140948363	.	0	.
chr4	151005950	151006451	.	0	.
chr4	155200948	155201449	.	0	.
chr7	125630262	125630763	.	0	.
chr11	70812334	70812835	.	0	.
chr17	86970987	86971488	.	0	.
chr6	146170717	146171218	.	0	.
chr10	10557923	10558424	.	0	.
chr12	25388962	25389463	.	0	.
chr9	119982333	119982834	.	0	.
chr14	66218717	66219218	.	0	.
chr1	86229179	86229680	.	0	.
chr1	153414138	153414639	.	0	.
chr2	180455942	180456443	.	0	.
chr7	80830400	80830901	.	0	.
chr5	121838619	121839120	.	0	.
chr14	32165487	32165988	.	0	.
chr12	51690962	51691463	.	0	.
chr16	32130153	32130654	.	0	.
chr17	35218223	35218724	.	0	.
chr2	38471804	38472305	.	0	.
chr8	83572996	83573497	.	0	.
chr13	41381822	41382323	.	0	.
chr2	166665527	166666028	.	0	.
chr4	152138488	152138989	.	0	.
chr7	128050672	128051173	.	0	.
chr10	80024105	80024606	.	0	.
chr7	83655111	83655612	.	0	.
chr16	89872028	89872529	.	0	.
chr5	124082648	124083149	.	0	.
chr4	139199552	139200053	.	0	.
chr4	129575140	129575641	.	0	.
chr2	165321521	165322022	.	0	.
chr13	52636316	52636817	.	0	.
chr15	86168546	86169047	.	0	.
chr8	84978580	84979081	.	0	.
chr4	136177857	136178358	.	0	.
chr5	136458505	136459006	.	0	.
chr14	25530324	25530825	.	0	.
chr13	43784856	43785357	.	0	.
chr5	23432528	23433029	.	0	.
chr7	90059705	90060206	.	0	.
chr7	120851575	120852076	.	0	.
chr5	124475238	124475739	.	0	.
chr1	166138036	166138537	.	0	.
chr8	125067068	125067569	.	0	.
chr6	117916728	117917229	.	0	.
chr2	167942695	167943196	.	0	.
chr1	36274282	36274783	.	0	.
chr1	62875638	62876139	.	0	.
chr1	91054855	91055356	.	0	.
chr1	127344894	127345395	.	0	.
chr1	138191852	138192353	.	0	.
chr1	164135867	164136368	.	0	.
chr1	164965992	164966493	.	0	.
chr11	54155832	54156333	.	0	.
chr11	103174251	103174752	.	0	.
chr11	109434199	109434700	.	0	.
chr12	111071693	111072194	.	0	.
chr13	51767958	51768459	.	0	.
chr13	60897238	60897739	.	0	.
chr13	60936386	60936887	.	0	.
chr13	98124618	98125119	.	0	.
chr14	30619903	30620404	.	0	.
chr14	63447897	63448398	.	0	.
chr15	74962407	74962908	.	0	.
chr15	77874754	77875255	.	0	.
chr15	80582644	80583145	.	0	.
chr15	84325777	84326278	.	0	.
chr15	89177426	89177927	.	0	.
chr16	87661175	87661676	.	0	.
chr17	7888960	7889461	.	0	.
chr17	25224508	25225009	.	0	.
chr18	46476764	46477265	.	0	.
chr19	46619997	46620498	.	0	.
chr2	26941473	26941974	.	0	.
chr2	27728135	27728636	.	0	.
chr2	65342054	65342555	.	0	.
chr2	71813905	71814406	.	0	.
chr2	152927307	152927808	.	0	.
chr2	158666318	158666819	.	0	.
chr2	174437006	174437507	.	0	.
chr3	21988051	21988552	.	0	.
chr3	135439089	135439590	.	0	.
chr3	146156124	146156625	.	0	.
chr4	8842802	8843303	.	0	.
chr4	136886056	136886557	.	0	.
chr4	140582646	140583147	.	0	.
chr5	23718770	23719271	.	0	.
chr5	66075168	66075669	.	0	.
chr5	66112032	66112533	.	0	.
chr5	112270885	112271386	.	0	.
chr5	136149101	136149602	.	0	.
chr5	139286990	139287491	.	0	.
chr6	34907599	34908100	.	0	.
chr6	97294051	97294552	.	0	.
chr7	4653815	4654316	.	0	.
chr7	16257855	16258356	.	0	.
chr7	31002671	31003172	.	0	.
chr7	80203450	80203951	.	0	.
chr8	120760508	120761009	.	0	.
chr9	65568717	65569218	.	0	.
chr9	89198999	89199500	.	0	.
chr9	90242846	90243347	.	0	.
chr9	108110458	108110959	.	0	.
chr1	136134958	136135459	.	0	.
chr11	48787687	48788188	.	0	.
chr15	89309851	89310352	.	0	.
chr7	126472207	126472708	.	0	.
chr14	70061578	70062079	.	0	.
chr11	102431988	102432489	.	0	.
chr5	134236818	134237319	.	0	.
chr1	87828206	87828707	.	0	.
chr16	33751546	33752047	.	0	.
chr8	13213211	13213712	.	0	.
chr14	31160397	31160898	.	0	.
chr7	24907047	24907548	.	0	.
chr9	42097000	42097501	.	0	.
chr11	76497697	76498198	.	0	.
chr9	78533226	78533727	.	0	.
chr11	109473480	109473981	.	0	.
chr4	132611218	132611719	.	0	.
chr4	53120423	53120924	.	0	.
chr2	93458673	93459174	.	0	.
chr13	49298297	49298798	.	0	.
chr6	87496080	87496581	.	0	.
chr16	93914146	93914647	.	0	.
chr10	8214031	8214532	.	0	.
chr19	6298868	6299369	.	0	.
chr7	135651682	135652183	.	0	.
chr4	137365546	137366047	.	0	.
chr1	171389320	171389821	.	0	.
chr7	28796601	28797102	.	0	.
chr17	13683721	13684222	.	0	.
chr4	63400988	63401489	.	0	.
chr8	104246996	104247497	.	0	.
chr2	28526115	28526616	.	0	.
chr6	119396130	119396631	.	0	.
chr4	129793830	129794331	.	0	.
chr15	78493454	78493955	.	0	.
chr17	88509011	88509512	.	0	.
chr2	168170093	168170594	.	0	.
chr7	64141632	64142133	.	0	.
chr10	62507548	62508049	.	0	.
chr12	85192638	85193139	.	0	.
chr9	106261035	106261536	.	0	.
chr7	75796407	75796908	.	0	.
chr11	116616001	116616502	.	0	.
chr19	8980718	8981219	.	0	.
chr12	112617175	112617676	.	0	.
chr4	137367445	137367946	.	0	.
chr15	102243351	102243852	.	0	.
chr13	112001046	112001547	.	0	.
chr12	3870766	3871267	.	0	.
chr12	55489018	55489519	.	0	.
chr17	5798352	5798853	.	0	.
chr1	181232017	181232518	.	0	.
chr5	120517549	120518050	.	0	.
chr1	136140172	136140673	.	0	.
chr10	81524000	81524501	.	0	.
chr13	13523742	13524243	.	0	.
chr2	90504710	90505211	.	0	.
chr14	66223544	66224045	.	0	.
chr15	102150687	102151188	.	0	.
chr2	60210257	60210758	.	0	.
chr5	31576614	31577115	.	0	.
chr3	88522023	88522524	.	0	.
chr7	28169938	28170439	.	0	.
chr10	121268700	121269201	.	0	.
chr11	106961487	106961988	.	0	.
chr13	107837996	107838497	.	0	.
chr5	105731014	105731515	.	0	.
chr10	75565379	75565880	.	0	.
chr10	77530043	77530544	.	0	.
chr9	48814543	48815044	.	0	.
chr11	53626577	53627078	.	0	.
chr15	78599063	78599564	.	0	.
chr3	41408394	41408895	.	0	.
chr11	115692663	115693164	.	0	.
chr19	37559627	37560128	.	0	.
chr6	114894428	114894929	.	0	.
chr11	119670999	119671500	.	0	.
chr14	67884674	67885175	.	0	.
chr17	71257038	71257539	.	0	.
chr18	32407310	32407811	.	0	.
chr11	74572531	74573032	.	0	.
chr12	81971212	81971713	.	0	.
chr12	91748230	91748731	.	0	.
chr15	100461642	100462143	.	0	.
chr17	34896269	34896770	.	0	.
chr2	166708275	166708776	.	0	.
chr7	18884375	18884876	.	0	.
chr10	118804517	118805018	.	0	.
chr16	10754542	10755043	.	0	.
chr4	128735124	128735625	.	0	.
chr5	134231889	134232390	.	0	.
chr2	129592463	129592964	.	0	.
chr1	165840694	165841195	.	0	.
chr2	28698548	28699049	.	0	.
chr10	111996961	111997462	.	0	.
chr8	92854511	92855012	.	0	.
chr10	127141518	127142019	.	0	.
chr15	27925690	27926191	.	0	.
chr19	6871639	6872140	.	0	.
chr2	127333911	127334412	.	0	.
chr6	54116890	54117391	.	0	.
chr1	171328960	171329461	.	0	.
chr15	99284557	99285058	.	0	.
chr6	120036889	120037390	.	0	.
chr3	87765024	87765525	.	0	.
chr6	125483324	125483825	.	0	.
chr11	97999217	97999718	.	0	.
chr8	122314903	122315404	.	0	.
chr9	63719679	63720180	.	0	.
chr3	107852815	107853316	.	0	.
chr9	45252358	45252859	.	0	.
chr19	34192475	34192976	.	0	.
chr4	135876630	135877131	.	0	.
chr18	35942101	35942602	.	0	.
chr1	36261998	36262499	.	0	.
chr1	85735664	85736165	.	0	.
chr1	131110689	131111190	.	0	.
chr1	165848898	165849399	.	0	.
chr1	171917427	171917928	.	0	.
chr1	191269460	191269961	.	0	.
chr10	60260573	60261074	.	0	.
chr10	75145969	75146470	.	0	.
chr10	99127591	99128092	.	0	.
chr10	122817891	122818392	.	0	.
chr11	97143453	97143954	.	0	.
chr11	98361175	98361676	.	0	.
chr12	102647024	102647525	.	0	.
chr13	5887983	5888484	.	0	.
chr13	43268372	43268873	.	0	.
chr13	112363140	112363641	.	0	.
chr13	113828964	113829465	.	0	.
chr15	12211477	12211978	.	0	.
chr15	78325796	78326297	.	0	.
chr15	101258350	101258851	.	0	.
chr16	36665821	36666322	.	0	.
chr16	87625239	87625740	.	0	.
chr16	91522426	91522927	.	0	.
chr17	27552938	27553439	.	0	.
chr18	75478922	75479423	.	0	.
chr19	29454113	29454614	.	0	.
chr19	53479508	53480009	.	0	.
chr2	32062924	32063425	.	0	.
chr2	132269131	132269632	.	0	.
chr2	157447705	157448206	.	0	.
chr3	69156389	69156890	.	0	.
chr4	47080239	47080740	.	0	.
chr4	106794415	106794916	.	0	.
chr4	132793894	132794395	.	0	.
chr4	135053517	135054018	.	0	.
chr4	135899006	135899507	.	0	.
chr4	139991662	139992163	.	0	.
chr5	64360412	64360913	.	0	.
chr5	135702894	135703395	.	0	.
chr6	116679538	116680039	.	0	.
chr6	117900635	117901136	.	0	.
chr6	125265155	125265656	.	0	.
chr6	131353365	131353866	.	0	.
chr7	25633100	25633601	.	0	.
chr7	141072211	141072712	.	0	.
chr8	13036983	13037484	.	0	.
chr8	35633661	35634162	.	0	.
chr8	117548284	117548785	.	0	.
chr8	122318034	122318535	.	0	.
chr8	126846112	126846613	.	0	.
chr9	32509780	32510281	.	0	.
chr9	32706139	32706640	.	0	.
chr9	40581938	40582439	.	0	.
chr9	61679646	61680147	.	0	.
chr9	69339732	69340233	.	0	.
chr5	142443407	142443908	.	0	.
chr7	24369784	24370285	.	0	.
chr11	103051216	103051717	.	0	.
chr19	47441543	47442044	.	0	.
chr4	133413046	133413547	.	0	.
chr17	5975652	5976153	.	0	.
chr2	9593918	9594419	.	0	.
chr6	125067461	125067962	.	0	.
chr16	11461442	11461943	.	0	.
chr2	165286305	165286806	.	0	.
chr5	113114106	113114607	.	0	.
chr5	124052011	124052512	.	0	.
chr5	149245924	149246425	.	0	.
chr12	25189128	25189629	.	0	.
chr15	27856299	27856800	.	0	.
chr18	82535159	82535660	.	0	.
chr6	90740621	90741122	.	0	.
chr7	30421446	30421947	.	0	.
chr10	26798981	26799482	.	0	.
chr6	71981277	71981778	.	0	.
chr8	95020376	95020877	.	0	.
chr16	38394188	38394689	.	0	.
chr2	120154355	120154856	.	0	.
chr14	70056327	70056828	.	0	.
chr11	54972246	54972747	.	0	.
chr8	70791316	70791817	.	0	.
chr5	124046961	124047462	.	0	.
chr4	128981139	128981640	.	0	.
chr6	119918687	119919188	.	0	.
chr11	65806361	65806862	.	0	.
chr10	78160690	78161191	.	0	.
chr5	134613741	134614242	.	0	.
chr2	167375232	167375733	.	0	.
chr14	64440934	64441435	.	0	.
chr2	167831038	167831539	.	0	.
chr19	41321182	41321683	.	0	.
chr7	25683489	25683990	.	0	.
chr2	173061994	173062495	.	0	.
chr10	66930594	66931095	.	0	.
chr17	87405452	87405953	.	0	.
chr4	63401490	63401991	.	0	.
chr15	78923500	78924001	.	0	.
chr9	108691323	108691824	.	0	.
chr11	115173498	115173999	.	0	.
chr18	23754408	23754909	.	0	.
chr2	75683033	75683534	.	0	.
chr5	32104072	32104573	.	0	.
chr19	55253387	55253888	.	0	.
chr2	129183621	129184122	.	0	.
chr1	88094191	88094692	.	0	.
chr11	98941975	98942476	.	0	.
chr5	122644096	122644597	.	0	.
chr17	31905848	31906349	.	0	.
chr6	67534968	67535469	.	0	.
chr17	12755169	12755670	.	0	.
chr7	19871213	19871714	.	0	.
chr7	75609794	75610295	.	0	.
chr8	119428186	119428687	.	0	.
chrX	48424512	48425013	.	0	.
chr10	81519573	81520074	.	0	.
chr2	163642725	163643226	.	0	.
chr3	59080893	59081394	.	0	.
chr4	140945340	140945841	.	0	.
chr4	145235964	145236465	.	0	.
chr18	35730211	35730712	.	0	.
chr15	27625275	27625776	.	0	.
chr18	12229968	12230469	.	0	.
chr4	145221982	145222483	.	0	.
chr6	124375441	124375942	.	0	.
chr8	120701936	120702437	.	0	.
chr12	69475253	69475754	.	0	.
chr11	32558516	32559017	.	0	.
chr17	73952152	73952653	.	0	.
chr2	19388721	19389222	.	0	.
chr2	91087498	91087999	.	0	.
chr2	150570020	150570521	.	0	.
chr6	17064866	17065367	.	0	.
chr2	181381082	181381583	.	0	.
chr19	4222008	4222509	.	0	.
chr4	130899789	130900290	.	0	.
chr7	66233158	66233659	.	0	.
chr9	41161321	41161822	.	0	.
chr1	193200539	193201040	.	0	.
chr4	40823529	40824030	.	0	.
chr15	79348071	79348572	.	0	.
chr1	180587677	180588178	.	0	.
chr4	132747574	132748075	.	0	.
chr5	65955746	65956247	.	0	.
chr2	125791587	125792088	.	0	.
chr4	40781141	40781642	.	0	.
chr1	36272430	36272931	.	0	.
chr10	111543873	111544374	.	0	.
chr14	66199927	66200428	.	0	.
chr2	165792669	165793170	.	0	.
chr7	16206802	16207303	.	0	.
chr15	83602697	83603198	.	0	.
chr1	132010943	132011444	.	0	.
chr17	70832444	70832945	.	0	.
chr3	131474324	131474825	.	0	.
chr5	113776107	113776608	.	0	.
chr4	141952112	141952613	.	0	.
chr11	52265707	52266208	.	0	.
chr11	87744883	87745384	.	0	.
chr3	90587658	90588159	.	0	.
chr7	66179678	66180179	.	0	.
chr11	98959376	98959877	.	0	.
chr8	105289243	105289744	.	0	.
chrX	140505721	140506222	.	0	.
chr11	60930660	60931161	.	0	.
chr17	83830541	83831042	.	0	.
chr6	50378086	50378587	.	0	.
chr11	120041772	120042273	.	0	.
chr1	191224695	191225196	.	0	.
chr1	39734253	39734754	.	0	.
chr1	92972795	92973296	.	0	.
chr1	133689824	133690325	.	0	.
chr10	22165530	22166031	.	0	.
chr10	22353792	22354293	.	0	.
chr10	41595474	41595975	.	0	.
chr10	81510140	81510641	.	0	.
chr10	127136402	127136903	.	0	.
chr11	34782425	34782926	.	0	.
chr11	79305566	79306067	.	0	.
chr11	83550369	83550870	.	0	.
chr11	103173623	103174124	.	0	.
chr11	106535968	106536469	.	0	.
chr11	109368971	109369472	.	0	.
chr11	119165973	119166474	.	0	.
chr12	72361896	72362397	.	0	.
chr12	106658105	106658606	.	0	.
chr13	51813805	51814306	.	0	.
chr13	52793511	52794012	.	0	.
chr13	63108562	63109063	.	0	.
chr14	25493389	25493890	.	0	.
chr14	57537636	57538137	.	0	.
chr14	61518762	61519263	.	0	.
chr15	27702058	27702559	.	0	.
chr15	78248329	78248830	.	0	.
chr15	78305435	78305936	.	0	.
chr15	78772330	78772831	.	0	.
chr16	49839740	49840241	.	0	.
chr16	91522929	91523430	.	0	.
chr16	95897928	95898429	.	0	.
chr17	35200969	35201470	.	0	.
chr17	46484246	46484747	.	0	.
chr17	78362366	78362867	.	0	.
chr19	42130957	42131458	.	0	.
chr2	27025557	27026058	.	0	.
chr2	27198575	27199076	.	0	.
chr2	32514305	32514806	.	0	.
chr2	35496434	35496935	.	0	.
chr2	116989270	116989771	.	0	.
chr2	153215409	153215910	.	0	.
chr2	168500767	168501268	.	0	.
chr3	52554993	52555494	.	0	.
chr3	87846109	87846610	.	0	.
chr3	152911743	152912244	.	0	.
chr4	6445118	6445619	.	0	.
chr4	53121677	53122178	.	0	.
chr4	119966146	119966647	.	0	.
chr4	126110691	126111192	.	0	.
chr5	20941160	20941661	.	0	.
chr5	37066659	37067160	.	0	.
chr5	100656386	100656887	.	0	.
chr5	118029449	118029950	.	0	.
chr6	39379680	39380181	.	0	.
chr6	71962683	71963184	.	0	.
chr6	112861528	112862029	.	0	.
chr7	64042811	64043312	.	0	.
chr7	142353858	142354359	.	0	.
chr7	143713389	143713890	.	0	.
chr8	70616576	70617077	.	0	.
chr8	126872535	126873036	.	0	.
chr9	32910734	32911235	.	0	.
chr9	46067568	46068069	.	0	.
chr9	55387984	55388485	.	0	.
chr8	122284776	122285277	.	0	.
chr17	34210568	34211069	.	0	.
chr4	119966734	119967235	.	0	.
chr19	5660921	5661422	.	0	.
chr7	19844513	19845014	.	0	.
chr11	69410522	69411023	.	0	.
chr15	80219157	80219658	.	0	.
chr13	51756498	51756999	.	0	.
chr4	135150383	135150884	.	0	.
chr2	24386276	24386777	.	0	.
chr15	76697911	76698412	.	0	.
chr5	113832411	113832912	.	0	.
chr9	40455305	40455806	.	0	.
chr2	60901329	60901830	.	0	.
chr11	52299582	52300083	.	0	.
chr14	75068400	75068901	.	0	.
chr4	135439163	135439664	.	0	.
chr11	32553389	32553890	.	0	.
chr12	33315102	33315603	.	0	.
chr4	141993997	141994498	.	0	.
chr15	78247683	78248184	.	0	.
chr3	97932159	97932660	.	0	.
chr13	49272073	49272574	.	0	.
chr2	93192531	93193032	.	0	.
chr4	141419311	141419812	.	0	.
chr2	93459232	93459733	.	0	.
chr17	86301366	86301867	.	0	.
chr5	123980731	123981232	.	0	.
chr7	4492738	4493239	.	0	.
chr16	89986604	89987105	.	0	.
chr4	145300119	145300620	.	0	.
chr8	83747805	83748306	.	0	.
chr12	110499178	110499679	.	0	.
chr6	91678976	91679477	.	0	.
chr12	25189665	25190166	.	0	.
chr17	35201763	35202264	.	0	.
chr5	118081886	118082387	.	0	.
chr6	146221976	146222477	.	0	.
chr7	83659415	83659916	.	0	.
chr7	125554403	125554904	.	0	.
chr14	64639462	64639963	.	0	.
chr4	139169291	139169792	.	0	.
chr17	46624017	46624518	.	0	.
chr2	19004752	19005253	.	0	.
chr3	89911197	89911698	.	0	.
chr2	30625541	30626042	.	0	.
chr9	63721553	63722054	.	0	.
chr11	4240030	4240531	.	0	.
chr13	49307438	49307939	.	0	.
chr8	88668687	88669188	.	0	.
chr10	13192329	13192830	.	0	.
chr1	86415451	86415952	.	0	.
chr12	111437481	111437982	.	0	.
chr13	51970038	51970539	.	0	.
chr4	145246654	145247155	.	0	.
chr18	82526322	82526823	.	0	.
chr10	37231896	37232397	.	0	.
chr8	72354207	72354708	.	0	.
chr8	119812819	119813320	.	0	.
chr4	3677888	3678389	.	0	.
chr10	40128331	40128832	.	0	.
chr11	95833825	95834326	.	0	.
chr11	107458147	107458648	.	0	.
chr17	86957803	86958304	.	0	.
chr2	11333234	11333735	.	0	.
chr3	95141364	95141865	.	0	.
chr5	122220291	122220792	.	0	.
chr5	139405425	139405926	.	0	.
chr6	72139438	72139939	.	0	.
chr6	118166982	118167483	.	0	.
chr8	120715928	120716429	.	0	.
chr13	56476738	56477239	.	0	.
chr5	67815540	67816041	.	0	.
chr5	134614749	134615250	.	0	.
chr6	29245728	29246229	.	0	.
chr8	125649348	125649849	.	0	.
chr1	171388163	171388664	.	0	.
chr11	118152960	118153461	.	0	.
chr14	65112868	65113369	.	0	.
chr2	93460774	93461275	.	0	.
chr3	136325764	136326265	.	0	.
chr4	130921937	130922438	.	0	.
chr5	64380674	64381175	.	0	.
chr11	96967119	96967620	.	0	.
chr17	8867809	8868310	.	0	.
chr19	6296473	6296974	.	0	.
chr4	43936987	43937488	.	0	.
chr8	88637514	88638015	.	0	.
chr15	80572309	80572810	.	0	.
chr5	136642066	136642567	.	0	.
chr1	151287422	151287923	.	0	.
chr11	118146439	118146940	.	0	.
chr16	89848520	89849021	.	0	.
chr18	50023986	50024487	.	0	.
chr2	156441808	156442309	.	0	.
chr9	116375900	116376401	.	0	.
chr14	31435858	31436359	.	0	.
chr12	112688278	112688779	.	0	.
chr2	103662058	103662559	.	0	.
chr4	144906466	144906967	.	0	.
chr1	88576091	88576592	.	0	.
chr12	99942527	99943028	.	0	.
chr19	47508678	47509179	.	0	.
chr19	47511249	47511750	.	0	.
chr12	3740015	3740516	.	0	.
chr5	139323917	139324418	.	0	.
chr11	17008411	17008912	.	0	.
chr4	8912617	8913118	.	0	.
chr13	52582638	52583139	.	0	.
chr7	64141123	64141624	.	0	.
chr11	97728778	97729279	.	0	.
chr15	101256792	101257293	.	0	.
chr16	96273225	96273726	.	0	.
chr4	133874463	133874964	.	0	.
chr1	128786764	128787265	.	0	.
chr10	67702668	67703169	.	0	.
chr5	20680936	20681437	.	0	.
chr1	180279514	180280015	.	0	.
chr13	117211363	117211864	.	0	.
chr11	68871821	68872322	.	0	.
chr12	25311571	25312072	.	0	.
chr6	124730137	124730638	.	0	.
chr17	87315154	87315655	.	0	.
chr15	79038829	79039330	.	0	.
chr10	77606396	77606897	.	0	.
chr5	150118313	150118814	.	0	.
chr1	36766764	36767265	.	0	.
chr1	51584559	51585060	.	0	.
chr1	88588964	88589465	.	0	.
chr1	89602740	89603241	.	0	.
chr1	91092244	91092745	.	0	.
chr1	161804345	161804846	.	0	.
chr1	184005575	184006076	.	0	.
chr1	191325651	191326152	.	0	.
chr10	60287342	60287843	.	0	.
chr10	62505660	62506161	.	0	.
chr10	67503549	67504050	.	0	.
chr10	68241041	68241542	.	0	.
chr10	77266162	77266663	.	0	.
chr10	79946634	79947135	.	0	.
chr10	127655035	127655536	.	0	.
chr11	6519593	6520094	.	0	.
chr11	63046384	63046885	.	0	.
chr11	82006720	82007221	.	0	.
chr11	95356662	95357163	.	0	.
chr11	101972086	101972587	.	0	.
chr11	109496039	109496540	.	0	.
chr11	115478053	115478554	.	0	.
chr12	73607560	73608061	.	0	.
chr12	84751936	84752437	.	0	.
chr12	85632361	85632862	.	0	.
chr12	108764831	108765332	.	0	.
chr12	112866966	112867467	.	0	.
chr13	54209340	54209841	.	0	.
chr13	54218332	54218833	.	0	.
chr13	55447572	55448073	.	0	.
chr13	73433530	73434031	.	0	.
chr13	97442372	97442873	.	0	.
chr13	107944785	107945286	.	0	.
chr13	113870369	113870870	.	0	.
chr14	67802725	67803226	.	0	.
chr14	67889726	67890227	.	0	.
chr14	70774679	70775180	.	0	.
chr14	103007787	103008288	.	0	.
chr14	103033391	103033892	.	0	.
chr15	74932458	74932959	.	0	.
chr15	79956407	79956908	.	0	.
chr15	86069028	86069529	.	0	.
chr16	23609697	23610198	.	0	.
chr16	91533343	91533844	.	0	.
chr16	93777554	93778055	.	0	.
chr17	13685445	13685946	.	0	.
chr17	24007381	24007882	.	0	.
chr17	25222563	25223064	.	0	.
chr17	26956949	26957450	.	0	.
chr17	28259738	28260239	.	0	.
chr17	29494302	29494803	.	0	.
chr17	32403341	32403842	.	0	.
chr17	34142866	34143367	.	0	.
chr17	50158472	50158973	.	0	.
chr17	80323584	80324085	.	0	.
chr17	88112230	88112731	.	0	.
chr18	4313817	4314318	.	0	.
chr18	62188693	62189194	.	0	.
chr18	65375985	65376486	.	0	.
chr19	5389713	5390214	.	0	.
chr2	102948430	102948931	.	0	.
chr2	144697867	144698368	.	0	.
chr2	153608143	153608644	.	0	.
chr2	163253067	163253568	.	0	.
chr3	40653017	40653518	.	0	.
chr3	84678748	84679249	.	0	.
chr3	88412518	88413019	.	0	.
chr3	107783295	107783796	.	0	.
chr4	11084658	11085159	.	0	.
chr4	32126721	32127222	.	0	.
chr4	45949034	45949535	.	0	.
chr4	46422522	46423023	.	0	.
chr4	46535097	46535598	.	0	.
chr4	116668139	116668640	.	0	.
chr4	121023889	121024390	.	0	.
chr4	134547299	134547800	.	0	.
chr4	135098542	135099043	.	0	.
chr4	140572321	140572822	.	0	.
chr4	140952308	140952809	.	0	.
chr4	145221409	145221910	.	0	.
chr5	36562996	36563497	.	0	.
chr5	36839603	36840104	.	0	.
chr5	102777826	102778327	.	0	.
chr5	105651081	105651582	.	0	.
chr5	110808204	110808705	.	0	.
chr5	122948991	122949492	.	0	.
chr5	146781572	146782073	.	0	.
chr6	67532836	67533337	.	0	.
chr6	83456336	83456837	.	0	.
chr6	89258367	89258868	.	0	.
chr7	25006596	25007097	.	0	.
chr7	65644467	65644968	.	0	.
chr7	81863119	81863620	.	0	.
chr7	126585184	126585685	.	0	.
chr7	127078052	127078553	.	0	.
chr7	127480350	127480851	.	0	.
chr7	140981710	140982211	.	0	.
chr8	71633095	71633596	.	0	.
chr8	84984698	84985199	.	0	.
chr8	95012460	95012961	.	0	.
chr8	111821249	111821750	.	0	.
chr8	115555331	115555832	.	0	.
chr8	124317757	124318258	.	0	.
chr9	21125346	21125847	.	0	.
chr9	32539183	32539684	.	0	.
chr9	45246556	45247057	.	0	.
chr9	60991465	60991966	.	0	.
chr9	88273320	88273821	.	0	.
chr9	111046180	111046681	.	0	.
chr9	117926974	117927475	.	0	.
chr9	120826093	120826594	.	0	.
chr11	58981816	58982317	.	0	.
chr7	45742326	45742827	.	0	.
chr4	33072787	33073288	.	0	.
chr16	93780660	93781161	.	0	.
chr8	40584636	40585137	.	0	.
chr9	103424786	103425287	.	0	.
chr1	156674716	156675217	.	0	.
chr4	152362078	152362579	.	0	.
chr6	135323282	135323783	.	0	.
chr2	160225440	160225941	.	0	.
chr9	65552219	65552720	.	0	.
chr5	105700421	105700922	.	0	.
chr1	180401670	180402171	.	0	.
chr19	10944009	10944510	.	0	.
chr14	25614637	25615138	.	0	.
chr8	126615693	126616194	.	0	.
chr11	60830627	60831128	.	0	.
chr2	154552474	154552975	.	0	.
chr5	88630772	88631273	.	0	.
chr13	49187235	49187736	.	0	.
chr2	126499679	126500180	.	0	.
chr7	97748958	97749459	.	0	.
chr9	65535423	65535924	.	0	.
chr5	3301045	3301546	.	0	.
chr9	21135899	21136400	.	0	.
chr2	167805891	167806392	.	0	.
chr15	78257386	78257887	.	0	.
chr15	84235634	84236135	.	0	.
chr6	125426346	125426847	.	0	.
chr11	103984191	103984692	.	0	.
chr12	25190348	25190849	.	0	.
chr2	34977092	34977593	.	0	.
chr8	70618864	70619365	.	0	.
chr2	166630357	166630858	.	0	.
chr4	145257951	145258452	.	0	.
chr5	99336321	99336822	.	0	.
chr7	114317336	114317837	.	0	.
chr5	147747957	147748458	.	0	.
chr7	28780531	28781032	.	0	.
chr15	59648404	59648905	.	0	.
chr11	98939515	98940016	.	0	.
chr6	113677291	113677792	.	0	.
chr8	83714659	83715160	.	0	.
chr3	137981316	137981817	.	0	.
chr15	73162504	73163005	.	0	.
chr9	61056060	61056561	.	0	.
chr10	77531581	77532082	.	0	.
chr2	58159904	58160405	.	0	.
chr8	13600028	13600529	.	0	.
chr19	10279554	10280055	.	0	.
chr8	105596517	105597018	.	0	.
chr3	95652181	95652682	.	0	.
chr11	69671152	69671653	.	0	.
chr15	25269404	25269905	.	0	.
chrX	101733797	101734298	.	0	.
chr4	8853999	8854500	.	0	.
chr11	82952049	82952550	.	0	.
chr2	90574183	90574684	.	0	.
chr19	5491063	5491564	.	0	.
chr15	78596829	78597330	.	0	.
chr12	69537638	69538139	.	0	.
chr13	49200636	49201137	.	0	.
chr14	102806439	102806940	.	0	.
chr8	77483581	77484082	.	0	.
chr2	172399752	172400253	.	0	.
chr5	124079858	124080359	.	0	.
chr2	168590119	168590620	.	0	.
chr3	116423252	116423753	.	0	.
chr1	85895435	85895936	.	0	.
chr15	81301044	81301545	.	0	.
chr17	31789070	31789571	.	0	.
chr7	142399214	142399715	.	0	.
chr1	180363965	180364466	.	0	.
chr7	28383501	28384002	.	0	.
chr17	37270728	37271229	.	0	.
chr15	9748619	9749120	.	0	.
chr6	90757248	90757749	.	0	.
chr2	153090474	153090975	.	0	.
chr15	99341061	99341562	.	0	.
chr8	70375090	70375591	.	0	.
chr10	40142079	40142580	.	0	.
chr10	80578829	80579330	.	0	.
chr2	22774102	22774603	.	0	.
chr14	120404994	120405495	.	0	.
chr18	39020757	39021258	.	0	.
chr1	91052843	91053344	.	0	.
chr18	36679559	36680060	.	0	.
chr5	36830377	36830878	.	0	.
chr4	117124341	117124842	.	0	.
chr10	127289133	127289634	.	0	.
chr1	95667416	95667917	.	0	.
chr13	30786157	30786658	.	0	.
chr2	65189294	65189795	.	0	.
chr11	24184885	24185386	.	0	.
chr13	98124064	98124565	.	0	.
chr6	87552249	87552750	.	0	.
chr7	101362956	101363457	.	0	.
chr7	135655224	135655725	.	0	.
chr5	24266546	24267047	.	0	.
chr11	80145489	80145990	.	0	.
chr12	111443264	111443765	.	0	.
chr15	67048513	67049014	.	0	.
chr11	75415080	75415581	.	0	.
chr4	134106016	134106517	.	0	.
chr9	66886768	66887269	.	0	.
chrX	106135888	106136389	.	0	.
chr11	50239139	50239640	.	0	.
chr18	75489223	75489724	.	0	.
chr4	46754781	46755282	.	0	.
chr6	129237812	129238313	.	0	.
chr16	30968358	30968859	.	0	.
chr11	67563076	67563577	.	0	.
chr3	95142569	95143070	.	0	.
chr7	13302671	13303172	.	0	.
chr8	88633338	88633839	.	0	.
chr11	116377281	116377782	.	0	.
chr6	31116285	31116786	.	0	.
chr2	166491743	166492244	.	0	.
chr7	118128762	118129263	.	0	.
chr7	142381138	142381639	.	0	.
chr12	102367973	102368474	.	0	.
chr17	28251491	28251992	.	0	.
chr1	87636855	87637356	.	0	.
chr11	60130474	60130975	.	0	.
chr14	122028923	122029424	.	0	.
chr1	143916527	143917028	.	0	.
chr17	29094731	29095232	.	0	.
chr3	105816111	105816612	.	0	.
chr9	7871658	7872159	.	0	.
chr1	134747453	134747954	.	0	.
chr11	32542104	32542605	.	0	.
chr2	13413384	13413885	.	0	.
chr2	102901259	102901760	.	0	.
chr5	21354297	21354798	.	0	.
chr6	100438652	100439153	.	0	.
chr6	120082812	120083313	.	0	.
chr6	128839420	128839921	.	0	.
chr8	124265699	124266200	.	0	.
chr1	180944514	180945015	.	0	.
chr14	31414597	31415098	.	0	.
chr8	77422846	77423347	.	0	.
chr9	90232671	90233172	.	0	.
chr1	156615589	156616090	.	0	.
chr18	84091484	84091985	.	0	.
chr2	91084454	91084955	.	0	.
chr9	56108091	56108592	.	0	.
chr3	27209412	27209913	.	0	.
chr8	84913075	84913576	.	0	.
chr19	57118749	57119250	.	0	.
chr18	34861491	34861992	.	0	.
chr11	23771116	23771617	.	0	.
chr1	191125816	191126317	.	0	.
chr4	129810816	129811317	.	0	.
chr1	64531999	64532500	.	0	.
chr5	139794886	139795387	.	0	.
chr11	4220376	4220877	.	0	.
chr5	147077242	147077743	.	0	.
chr1	155059459	155059960	.	0	.
chr1	37317623	37318124	.	0	.
chr1	72428488	72428989	.	0	.
chr1	85751449	85751950	.	0	.
chr1	86406867	86407368	.	0	.
chr1	88655054	88655555	.	0	.
chr1	91193138	91193639	.	0	.
chr1	92080140	92080641	.	0	.
chr1	127251626	127252127	.	0	.
chr1	180829728	180830229	.	0	.
chr1	183979650	183980151	.	0	.
chr1	191955019	191955520	.	0	.
chr10	75303409	75303910	.	0	.
chr10	78137059	78137560	.	0	.
chr10	78303627	78304128	.	0	.
chr10	94959982	94960483	.	0	.
chr11	8575112	8575613	.	0	.
chr11	51931776	51932277	.	0	.
chr11	63984674	63985175	.	0	.
chr11	69894609	69895110	.	0	.
chr11	80323163	80323664	.	0	.
chr11	109417602	109418103	.	0	.
chr11	118363180	118363681	.	0	.
chr12	4211032	4211533	.	0	.
chr12	73593304	73593805	.	0	.
chr12	73604682	73605183	.	0	.
chr12	73715893	73716394	.	0	.
chr12	99225159	99225660	.	0	.
chr12	104061858	104062359	.	0	.
chr12	110866229	110866730	.	0	.
chr12	112854836	112855337	.	0	.
chr13	55369202	55369703	.	0	.
chr13	114845802	114846303	.	0	.
chr14	16243079	16243580	.	0	.
chr14	33194101	33194602	.	0	.
chr14	33247595	33248096	.	0	.
chr15	57772616	57773117	.	0	.
chr15	58171262	58171763	.	0	.
chr15	64075502	64076003	.	0	.
chr16	21382096	21382597	.	0	.
chr16	92818413	92818914	.	0	.
chr17	6008495	6008996	.	0	.
chr17	27042951	27043452	.	0	.
chr17	28750513	28751014	.	0	.
chr17	31873017	31873518	.	0	.
chr17	33563408	33563909	.	0	.
chr17	43557740	43558241	.	0	.
chr17	47439264	47439765	.	0	.
chr17	50071560	50072061	.	0	.
chr17	52168212	52168713	.	0	.
chr17	56472810	56473311	.	0	.
chr18	64920798	64921299	.	0	.
chr18	65802177	65802678	.	0	.
chr18	75478417	75478918	.	0	.
chr19	37435958	37436459	.	0	.
chr19	40637536	40638037	.	0	.
chr19	56530424	56530925	.	0	.
chr19	57132792	57133293	.	0	.
chr2	33353396	33353897	.	0	.
chr2	33755614	33756115	.	0	.
chr2	34962853	34963354	.	0	.
chr2	75685338	75685839	.	0	.
chr2	91206505	91207006	.	0	.
chr2	91498069	91498570	.	0	.
chr2	93192017	93192518	.	0	.
chr2	168539800	168540301	.	0	.
chr3	105895227	105895728	.	0	.
chr3	139041818	139042319	.	0	.
chr3	157575663	157576164	.	0	.
chr4	11721323	11721824	.	0	.
chr4	32149029	32149530	.	0	.
chr4	71291677	71292178	.	0	.
chr4	125125357	125125858	.	0	.
chr4	135205650	135206151	.	0	.
chr5	64487640	64488141	.	0	.
chr5	65102558	65103059	.	0	.
chr5	93152411	93152912	.	0	.
chr5	105696060	105696561	.	0	.
chr5	120139069	120139570	.	0	.
chr5	150611650	150612151	.	0	.
chr6	38710444	38710945	.	0	.
chr6	48732951	48733452	.	0	.
chr6	48738773	48739274	.	0	.
chr6	50416685	50417186	.	0	.
chr6	83482372	83482873	.	0	.
chr6	99241537	99242038	.	0	.
chr6	113662920	113663421	.	0	.
chr6	122650575	122651076	.	0	.
chr6	122654240	122654741	.	0	.
chr6	125492832	125493333	.	0	.
chr6	127239997	127240498	.	0	.
chr6	136497735	136498236	.	0	.
chr6	144901823	144902324	.	0	.
chr7	24450461	24450962	.	0	.
chr7	34192770	34193271	.	0	.
chr7	66262641	66263142	.	0	.
chr7	81075237	81075738	.	0	.
chr7	98809488	98809989	.	0	.
chr8	22838524	22839025	.	0	.
chr8	34208046	34208547	.	0	.
chr8	35428591	35429092	.	0	.
chr8	84997824	84998325	.	0	.
chr8	88288760	88289261	.	0	.
chr8	120487008	120487509	.	0	.
chr8	124275544	124276045	.	0	.
chr8	128646383	128646884	.	0	.
chr9	45079068	45079569	.	0	.
chr9	61427073	61427574	.	0	.
chr9	100460254	100460755	.	0	.
chr9	106199939	106200440	.	0	.
chr9	116211995	116212496	.	0	.
chr9	120866597	120867098	.	0	.
chrX	101737075	101737576	.	0	.
chr11	114897956	114898457	.	0	.
chr15	78588880	78589381	.	0	.
chr17	28736469	28736970	.	0	.
chr5	135478805	135479306	.	0	.
chr8	70832861	70833362	.	0	.
chr11	116078226	116078727	.	0	.
chr1	191875667	191876168	.	0	.
chr15	102150109	102150610	.	0	.
chr8	122870278	122870779	.	0	.
chr1	74381373	74381874	.	0	.
chr1	106407856	106408357	.	0	.
chr11	97829365	97829866	.	0	.
chr13	43778128	43778629	.	0	.
chr19	37495246	37495747	.	0	.
chr3	89796300	89796801	.	0	.
chr4	132808271	132808772	.	0	.
chr7	107707711	107708212	.	0	.
chr19	9931325	9931826	.	0	.
chr6	51533740	51534241	.	0	.
chr12	116405629	116406130	.	0	.
chr16	10772006	10772507	.	0	.
chr16	91398130	91398631	.	0	.
chr14	30593289	30593790	.	0	.
chr12	112866462	112866963	.	0	.
chr16	32163306	32163807	.	0	.
chr8	26963148	26963649	.	0	.
chr5	124084204	124084705	.	0	.
chr17	28208080	28208581	.	0	.
chr5	105110012	105110513	.	0	.
chr12	73610707	73611208	.	0	.
chr2	172399214	172399715	.	0	.
chr9	119982864	119983365	.	0	.
chr2	3418866	3419367	.	0	.
chr17	27038158	27038659	.	0	.
chr5	139299184	139299685	.	0	.
chr18	35849948	35850449	.	0	.
chr1	135112622	135113123	.	0	.
chr18	68227450	68227951	.	0	.
chr15	103333092	103333593	.	0	.
chr19	5661426	5661927	.	0	.
chr19	37436492	37436993	.	0	.
chr11	4237429	4237930	.	0	.
chr11	100850260	100850761	.	0	.
chr17	27011924	27012425	.	0	.
chr3	21952763	21953264	.	0	.
chr6	108657894	108658395	.	0	.
chr10	80678631	80679132	.	0	.
chr11	72946260	72946761	.	0	.
chr5	150593126	150593627	.	0	.
chr7	43532895	43533396	.	0	.
chr4	150060770	150061271	.	0	.
chr14	20765851	20766352	.	0	.
chr19	8983198	8983699	.	0	.
chr8	25274314	25274815	.	0	.
chr1	180356153	180356654	.	0	.
chr18	80691731	80692232	.	0	.
chr5	53509585	53510086	.	0	.
chr4	3648949	3649450	.	0	.
chr19	47512591	47513092	.	0	.
chr14	103469416	103469917	.	0	.
chr2	166656570	166657071	.	0	.
chr17	83277595	83278096	.	0	.
chr1	180392879	180393380	.	0	.
chr12	51866314	51866815	.	0	.
chr14	61498150	61498651	.	0	.
chr1	36309452	36309953	.	0	.
chr4	63404172	63404673	.	0	.
chr10	13500905	13501406	.	0	.
chr2	30463864	30464365	.	0	.
chr11	121703194	121703695	.	0	.
chr7	135588594	135589095	.	0	.
chr16	92696528	92697029	.	0	.
chr17	87283692	87284193	.	0	.
chr11	11685890	11686391	.	0	.
chr5	64812551	64813052	.	0	.
chr10	127481366	127481867	.	0	.
chr17	29491150	29491651	.	0	.
chr9	41070625	41071126	.	0	.
chr7	80386428	80386929	.	0	.
chr11	46326634	46327135	.	0	.
chr7	31148682	31149183	.	0	.
[truncated: 1,922 more rows]

## Sheet: Neutrophils.DAR
chr11	87749360	87749861	.	0	.
chr1	128712726	128713227	.	0	.
chr10	62543362	62543863	.	0	.
chr2	32714810	32715311	.	0	.
chr14	70056838	70057339	.	0	.
chr3	107852815	107853316	.	0	.
chr15	78258151	78258652	.	0	.
chr2	167590421	167590922	.	0	.
chr10	77550896	77551397	.	0	.
chr14	70065796	70066297	.	0	.
chr2	167753883	167754384	.	0	.
chr4	134098649	134099150	.	0	.
chr11	103178071	103178572	.	0	.
chr11	103174854	103175355	.	0	.
chr2	91082778	91083279	.	0	.
chr2	153084090	153084591	.	0	.
chr2	167775073	167775574	.	0	.
chr7	127091098	127091599	.	0	.
chr12	111442343	111442844	.	0	.
chr7	80386428	80386929	.	0	.
chr19	10841772	10842273	.	0	.
chr5	140617670	140618171	.	0	.
chr11	87755266	87755767	.	0	.
chr11	118145619	118146120	.	0	.
chr8	126849500	126850001	.	0	.
chr7	80074766	80075267	.	0	.
chr8	27175056	27175557	.	0	.
chr18	34856178	34856679	.	0	.
chr2	167759876	167760377	.	0	.
chr17	48232507	48233008	.	0	.
chr9	44986347	44986848	.	0	.
chr11	98941975	98942476	.	0	.
chr17	31905848	31906349	.	0	.
chr12	112629217	112629718	.	0	.
chr2	126606166	126606667	.	0	.
chr13	51740679	51741180	.	0	.
chr2	28539957	28540458	.	0	.
chr4	145240930	145241431	.	0	.
chr19	53464637	53465138	.	0	.
chr7	25205654	25206155	.	0	.
chr3	93506204	93506705	.	0	.
chr1	88587253	88587754	.	0	.
chr14	103058973	103059474	.	0	.
chr9	45245956	45246457	.	0	.
chr7	30419384	30419885	.	0	.
chr15	78572564	78573065	.	0	.
chr11	4232618	4233119	.	0	.
chr17	48247321	48247822	.	0	.
chr13	13523742	13524243	.	0	.
chr2	167589241	167589742	.	0	.
chr5	115534877	115535378	.	0	.
chr7	16258921	16259422	.	0	.
chr14	75179231	75179732	.	0	.
chr17	84119078	84119579	.	0	.
chr1	191277543	191278044	.	0	.
chr12	111437481	111437982	.	0	.
chr2	32715323	32715824	.	0	.
chr8	13594720	13595221	.	0	.
chr11	75571216	75571717	.	0	.
chr11	109479837	109480338	.	0	.
chr19	6299388	6299889	.	0	.
chr3	107783295	107783796	.	0	.
chr4	132563950	132564451	.	0	.
chr8	86887967	86888468	.	0	.
chr2	167588595	167589096	.	0	.
chr5	32121913	32122414	.	0	.
chr7	31041910	31042411	.	0	.
chr1	191281152	191281653	.	0	.
chr17	29395430	29395931	.	0	.
chr8	117241029	117241530	.	0	.
chr3	131474324	131474825	.	0	.
chr11	68871821	68872322	.	0	.
chr6	72140236	72140737	.	0	.
chr15	25828374	25828875	.	0	.
chr15	78244577	78245078	.	0	.
chr1	9991740	9992241	.	0	.
chr1	40084413	40084914	.	0	.
chr1	164135275	164135776	.	0	.
chr16	38403576	38404077	.	0	.
chr17	26497248	26497749	.	0	.
chr7	140947007	140947508	.	0	.
chr1	180392879	180393380	.	0	.
chr2	151974110	151974611	.	0	.
chr1	155059459	155059960	.	0	.
chr1	39577235	39577736	.	0	.
chr2	91971986	91972487	.	0	.
chr15	78591774	78592275	.	0	.
chr16	91355120	91355621	.	0	.
chr19	46618282	46618783	.	0	.
chr11	87748630	87749131	.	0	.
chr5	134236818	134237319	.	0	.
chr19	9931325	9931826	.	0	.
chr11	87756421	87756922	.	0	.
chr3	107849602	107850103	.	0	.
chr2	29624816	29625317	.	0	.
chr1	180403508	180404009	.	0	.
chr1	39602420	39602921	.	0	.
chr1	92972067	92972568	.	0	.
chr1	155050209	155050710	.	0	.
chr1	171388722	171389223	.	0	.
chr10	60390924	60391425	.	0	.
chr15	78247683	78248184	.	0	.
chr2	167649153	167649654	.	0	.
chr6	86609243	86609744	.	0	.
chr7	83659415	83659916	.	0	.
chr8	88662160	88662661	.	0	.
chr8	122430211	122430712	.	0	.
chr10	94828480	94828981	.	0	.
chr7	30413521	30414022	.	0	.
chr7	126584637	126585138	.	0	.
chr19	4294346	4294847	.	0	.
chr10	96333186	96333687	.	0	.
chr12	73779134	73779635	.	0	.
chr13	13529099	13529600	.	0	.
chr17	33978692	33979193	.	0	.
chr2	172399752	172400253	.	0	.
chr3	51209996	51210497	.	0	.
chr4	59260982	59261483	.	0	.
chr6	90751541	90752042	.	0	.
chr3	90586825	90587326	.	0	.
chr2	178505956	178506457	.	0	.
chr7	19265827	19266328	.	0	.
chr9	35124067	35124568	.	0	.
chr17	88132812	88133313	.	0	.
chr5	142909066	142909567	.	0	.
chr3	107852294	107852795	.	0	.
chr11	109473480	109473981	.	0	.
chr13	24614366	24614867	.	0	.
chr18	54846453	54846954	.	0	.
chr2	26474935	26475436	.	0	.
chr2	172400943	172401444	.	0	.
chr3	107819107	107819608	.	0	.
chr4	54527521	54528022	.	0	.
chr5	134232466	134232967	.	0	.
chr7	16257855	16258356	.	0	.
chr8	72169195	72169696	.	0	.
chr5	142794508	142795009	.	0	.
chr1	128592127	128592628	.	0	.
chr10	77536664	77537165	.	0	.
chr11	117991688	117992189	.	0	.
chr4	121023889	121024390	.	0	.
chr4	122848005	122848506	.	0	.
chr6	124732889	124733390	.	0	.
chr8	126757884	126758385	.	0	.
chr10	84516327	84516828	.	0	.
chr12	111441568	111442069	.	0	.
chr17	57193892	57194393	.	0	.
chr2	164942850	164943351	.	0	.
chr15	73487134	73487635	.	0	.
chr19	9938574	9939075	.	0	.
chr4	132794742	132795243	.	0	.
chr17	31870965	31871466	.	0	.
chr10	81134161	81134662	.	0	.
chr14	60736657	60737158	.	0	.
chr11	79118752	79119253	.	0	.
chr12	51866314	51866815	.	0	.
chr12	76537429	76537930	.	0	.
chr13	101659034	101659535	.	0	.
chr16	24199792	24200293	.	0	.
chr17	80564445	80564946	.	0	.
chr17	88112230	88112731	.	0	.
chr2	144697867	144698368	.	0	.
chr3	95651203	95651704	.	0	.
chr5	113841845	113842346	.	0	.
chr6	88060552	88061053	.	0	.
chr7	28379078	28379579	.	0	.
chr7	100855785	100856286	.	0	.
chr9	56108091	56108592	.	0	.
chr9	106261035	106261536	.	0	.
chr19	5844976	5845477	.	0	.
chr2	172393505	172394006	.	0	.
chr8	126805859	126806360	.	0	.
chr18	82525733	82526234	.	0	.
chr2	129586014	129586515	.	0	.
chr2	153090474	153090975	.	0	.
chr1	150164890	150165391	.	0	.
chr5	134231889	134232390	.	0	.
chr3	95650649	95651150	.	0	.
chr11	116077383	116077884	.	0	.
chr6	90757248	90757749	.	0	.
chr3	83841314	83841815	.	0	.
chr1	87626382	87626883	.	0	.
chr1	91080170	91080671	.	0	.
chr10	20104232	20104733	.	0	.
chr11	60935227	60935728	.	0	.
chr13	24599732	24600233	.	0	.
chr14	54227330	54227831	.	0	.
chr14	66223544	66224045	.	0	.
chr14	70054184	70054685	.	0	.
chr16	32113523	32114024	.	0	.
chr2	69380282	69380783	.	0	.
chr2	129413341	129413842	.	0	.
chr8	126807220	126807721	.	0	.
chr9	47938878	47939379	.	0	.
chr15	59650449	59650950	.	0	.
chr5	149245924	149246425	.	0	.
chr17	26509491	26509992	.	0	.
chr8	126850057	126850558	.	0	.
chr5	90903455	90903956	.	0	.
chr17	43137820	43138321	.	0	.
chr19	9974876	9975377	.	0	.
chr15	101256792	101257293	.	0	.
chr8	70618864	70619365	.	0	.
chr15	78607438	78607939	.	0	.
chr10	82958194	82958695	.	0	.
chr11	95805576	95806077	.	0	.
chr13	9878408	9878909	.	0	.
chr14	67884674	67885175	.	0	.
chr15	99341061	99341562	.	0	.
chr19	40639892	40640393	.	0	.
chr2	38481086	38481587	.	0	.
chr2	167656783	167657284	.	0	.
chr4	134097190	134097691	.	0	.
chr5	135537264	135537765	.	0	.
chr9	78533226	78533727	.	0	.
chr10	95677603	95678104	.	0	.
chr5	142920676	142921177	.	0	.
chr4	119127112	119127613	.	0	.
chr2	26483133	26483634	.	0	.
chr8	70544054	70544555	.	0	.
chr2	151972667	151973168	.	0	.
chr8	119825930	119826431	.	0	.
chr4	117124936	117125437	.	0	.
chr5	123128814	123129315	.	0	.
chr13	75797754	75798255	.	0	.
chr2	102901259	102901760	.	0	.
chr1	170709497	170709998	.	0	.
chr11	115133721	115134222	.	0	.
chr15	76273666	76274167	.	0	.
chr19	6297629	6298130	.	0	.
chr6	88053675	88054176	.	0	.
chr6	90754913	90755414	.	0	.
chr7	80779183	80779684	.	0	.
chr9	70838460	70838961	.	0	.
chr9	73089439	73089940	.	0	.
chr12	51865597	51866098	.	0	.
chr7	30394312	30394813	.	0	.
chr2	158175344	158175845	.	0	.
chr5	142906517	142907018	.	0	.
chr6	120473391	120473892	.	0	.
chr11	28365369	28365870	.	0	.
chr17	87315154	87315655	.	0	.
chr15	77855228	77855729	.	0	.
chr2	38483030	38483531	.	0	.
chr2	117976895	117977396	.	0	.
chr4	53120423	53120924	.	0	.
chr5	5420038	5420539	.	0	.
chr5	105696060	105696561	.	0	.
chr7	110824532	110825033	.	0	.
chr5	64960784	64961285	.	0	.
chr6	120915149	120915650	.	0	.
chr4	3648949	3649450	.	0	.
chr4	117124341	117124842	.	0	.
chr5	115535587	115536088	.	0	.
chr14	75180492	75180993	.	0	.
chr7	30420103	30420604	.	0	.
chr16	55821922	55822423	.	0	.
chr1	91056404	91056905	.	0	.
chr3	27617696	27618197	.	0	.
chr11	74572531	74573032	.	0	.
chr19	41344876	41345377	.	0	.
chr17	26532383	26532884	.	0	.
chr14	70056327	70056828	.	0	.
chr12	73755492	73755993	.	0	.
chr9	107629027	107629528	.	0	.
chr19	4300103	4300604	.	0	.
chr1	128570011	128570512	.	0	.
chr11	68863733	68864234	.	0	.
chr11	87754527	87755028	.	0	.
chr13	49196785	49197286	.	0	.
chr15	101373081	101373582	.	0	.
chr16	38394188	38394689	.	0	.
chr17	55952357	55952858	.	0	.
chr17	80563686	80564187	.	0	.
chr2	31061029	31061530	.	0	.
chr8	117343444	117343945	.	0	.
chr2	158132999	158133500	.	0	.
chr7	43642580	43643081	.	0	.
chr16	87625239	87625740	.	0	.
chr5	136458505	136459006	.	0	.
chr5	115516033	115516534	.	0	.
chr11	87749890	87750391	.	0	.
chr6	86607510	86608011	.	0	.
chr13	111489719	111490220	.	0	.
chr6	86570783	86571284	.	0	.
chr16	95955650	95956151	.	0	.
chr15	102150687	102151188	.	0	.
chr18	60499946	60500447	.	0	.
chr16	95728711	95729212	.	0	.
chr9	60998583	60999084	.	0	.
chr9	41070625	41071126	.	0	.
chr7	28382882	28383383	.	0	.
chr10	67702668	67703169	.	0	.
chr17	26514634	26515135	.	0	.
chr2	29672849	29673350	.	0	.
chr2	126466664	126467165	.	0	.
chr4	125145189	125145690	.	0	.
chr5	32077188	32077689	.	0	.
chr6	145508788	145509289	.	0	.
chr7	16243955	16244456	.	0	.
chr7	80426237	80426738	.	0	.
chr7	139971368	139971869	.	0	.
chr9	41161321	41161822	.	0	.
chr9	110676589	110677090	.	0	.
chr17	57227967	57228468	.	0	.
chr8	27174454	27174955	.	0	.
chr11	4229789	4230290	.	0	.
chr14	25857185	25857686	.	0	.
chr3	9020137	9020638	.	0	.
chr5	124052011	124052512	.	0	.
chr14	70175158	70175659	.	0	.
chr1	134093698	134094199	.	0	.
chr13	59822386	59822887	.	0	.
chr11	4237429	4237930	.	0	.
chr10	80695164	80695665	.	0	.
chr10	98914177	98914678	.	0	.
chr10	45048607	45049108	.	0	.
chr15	76204090	76204591	.	0	.
chr1	75187801	75188302	.	0	.
chr13	40968513	40969014	.	0	.
chr14	66264551	66265052	.	0	.
chr2	29771752	29772253	.	0	.
chr1	171234091	171234592	.	0	.
chr1	131199922	131200423	.	0	.
chr17	35201763	35202264	.	0	.
chr17	35262715	35263216	.	0	.
chr5	142905718	142906219	.	0	.
chr3	65929235	65929736	.	0	.
chr1	182254621	182255122	.	0	.
chr14	75069246	75069747	.	0	.
chr8	119784185	119784686	.	0	.
chr10	82985015	82985516	.	0	.
chr11	53794753	53795254	.	0	.
chr2	38536248	38536749	.	0	.
chr16	24193212	24193713	.	0	.
chr5	140616651	140617152	.	0	.
chr10	80075103	80075604	.	0	.
chr2	118007901	118008402	.	0	.
chr19	6275888	6276389	.	0	.
chr8	13600028	13600529	.	0	.
chr1	92972795	92973296	.	0	.
chr10	60344067	60344568	.	0	.
chr11	114917013	114917514	.	0	.
chr11	120938785	120939286	.	0	.
chr13	55447572	55448073	.	0	.
chr15	36688197	36688698	.	0	.
chr15	78571569	78572070	.	0	.
chr15	78599063	78599564	.	0	.
chr16	92620652	92621153	.	0	.
chr2	29624246	29624747	.	0	.
chr2	140793764	140794265	.	0	.
chr2	154574124	154574625	.	0	.
chr3	90668859	90669360	.	0	.
chr3	95645258	95645759	.	0	.
chr5	90689583	90690084	.	0	.
chr5	137179820	137180321	.	0	.
chr7	19577894	19578395	.	0	.
chr8	11463928	11464429	.	0	.
chr9	45252358	45252859	.	0	.
chr3	84665925	84666426	.	0	.
chr14	48131211	48131712	.	0	.
chr8	121792161	121792662	.	0	.
chr4	43965742	43966243	.	0	.
chr6	124723487	124723988	.	0	.
chr11	83640031	83640532	.	0	.
chr11	73024409	73024910	.	0	.
chr12	103341117	103341618	.	0	.
chr15	76269594	76270095	.	0	.
chr2	172399214	172399715	.	0	.
chr2	102900731	102901232	.	0	.
chr17	72836216	72836717	.	0	.
chr1	181860598	181861099	.	0	.
chr7	101011783	101012284	.	0	.
chr6	67532836	67533337	.	0	.
chr1	84406826	84407327	.	0	.
chr1	87637452	87637953	.	0	.
chr10	82962547	82963048	.	0	.
chr10	96337778	96338279	.	0	.
chr10	117860870	117861371	.	0	.
chr14	75195384	75195885	.	0	.
chr14	103048696	103049197	.	0	.
chr15	78248329	78248830	.	0	.
chr19	5991906	5992407	.	0	.
chr2	45236101	45236602	.	0	.
chr2	75731121	75731622	.	0	.
chr2	102959006	102959507	.	0	.
chr2	151973237	151973738	.	0	.
chr2	173061994	173062495	.	0	.
chr4	59238570	59239071	.	0	.
chr4	134116955	134117456	.	0	.
chr5	32112444	32112945	.	0	.
chr6	114648526	114649027	.	0	.
chr7	16207474	16207975	.	0	.
chr7	25219747	25220248	.	0	.
chr7	117449496	117449997	.	0	.
chr7	135666314	135666815	.	0	.
chr3	90052482	90052983	.	0	.
chr19	41339218	41339719	.	0	.
chr3	95652181	95652682	.	0	.
chr6	91712766	91713267	.	0	.
chr12	70227522	70228023	.	0	.
chr17	26508946	26509447	.	0	.
chr1	75219042	75219543	.	0	.
chr17	6746671	6747172	.	0	.
chr4	135898353	135898854	.	0	.
chr7	117394103	117394604	.	0	.
chr10	67025396	67025897	.	0	.
chr5	3301045	3301546	.	0	.
chr1	85703473	85703974	.	0	.
chr2	129413895	129414396	.	0	.
chr2	129595567	129596068	.	0	.
chr15	81021398	81021899	.	0	.
chr6	149193398	149193899	.	0	.
chr12	86833638	86834139	.	0	.
chr2	129591888	129592389	.	0	.
chr10	67713016	67713517	.	0	.
chr9	65541605	65542106	.	0	.
chr4	132982970	132983471	.	0	.
chr7	43532895	43533396	.	0	.
chr16	4912914	4913415	.	0	.
chr8	72322345	72322846	.	0	.
chr1	37491676	37492177	.	0	.
chr1	74374985	74375486	.	0	.
chr1	152807503	152808004	.	0	.
chr11	80489661	80490162	.	0	.
chr11	95805038	95805539	.	0	.
chr13	37619707	37620208	.	0	.
chr14	27379345	27379846	.	0	.
chr15	25843453	25843954	.	0	.
chr16	93028570	93029071	.	0	.
chr17	48324177	48324678	.	0	.
chr17	84108032	84108533	.	0	.
chr18	56733746	56734247	.	0	.
chr19	10944009	10944510	.	0	.
chr19	40401038	40401539	.	0	.
chr2	38483635	38484136	.	0	.
chr2	91096465	91096966	.	0	.
chr2	128373933	128374434	.	0	.
chr4	119125831	119126332	.	0	.
chr6	90756645	90757146	.	0	.
chr8	18936146	18936647	.	0	.
chr9	50592924	50593425	.	0	.
chr9	107640076	107640577	.	0	.
chr7	19316392	19316893	.	0	.
chr3	131490614	131491115	.	0	.
chr17	35200410	35200911	.	0	.
chr11	65806361	65806862	.	0	.
chr15	103258253	103258754	.	0	.
chr16	58481224	58481725	.	0	.
chr11	76482614	76483115	.	0	.
chr8	119812819	119813320	.	0	.
chr7	127967188	127967689	.	0	.
chr19	24899551	24900052	.	0	.
chr10	12975840	12976341	.	0	.
chr17	43138351	43138852	.	0	.
chr1	172513792	172514293	.	0	.
chr10	93124211	93124712	.	0	.
chr18	62179796	62180297	.	0	.
chr7	142399214	142399715	.	0	.
chr6	91706069	91706570	.	0	.
chr2	167368328	167368829	.	0	.
chr7	30422001	30422502	.	0	.
chr19	4097003	4097504	.	0	.
chr9	120054814	120055315	.	0	.
chr16	49839740	49840241	.	0	.
chr11	87751453	87751954	.	0	.
chr8	126804048	126804549	.	0	.
chr1	89252563	89253064	.	0	.
chr1	180404285	180404786	.	0	.
chr10	7063991	7064492	.	0	.
chr10	83153780	83154281	.	0	.
chr10	95767768	95768269	.	0	.
chr10	96181286	96181787	.	0	.
chr11	74837533	74838034	.	0	.
chr11	79076404	79076905	.	0	.
chr11	97829921	97830422	.	0	.
chr15	90896278	90896779	.	0	.
chr16	22656905	22657406	.	0	.
chr16	24089914	24090415	.	0	.
chr16	36196592	36197093	.	0	.
chr16	91398130	91398631	.	0	.
chr16	91522426	91522927	.	0	.
chr16	91522929	91523430	.	0	.
chr16	95827323	95827824	.	0	.
chr16	96439636	96440137	.	0	.
chr17	13683721	13684222	.	0	.
chr17	32040191	32040692	.	0	.
chr19	6298868	6299369	.	0	.
chr19	24900151	24900652	.	0	.
chr19	41321182	41321683	.	0	.
chr2	60086119	60086620	.	0	.
chr3	107818602	107819103	.	0	.
chr4	80311052	80311553	.	0	.
chr4	130913959	130914460	.	0	.
chr4	145257951	145258452	.	0	.
chr4	149155704	149156205	.	0	.
chr4	154911155	154911656	.	0	.
chr5	3502526	3503027	.	0	.
chr5	100860672	100861173	.	0	.
chr5	137857813	137858314	.	0	.
chr5	138683001	138683502	.	0	.
chr7	139984500	139985001	.	0	.
chr8	34622619	34623120	.	0	.
chr8	70616576	70617077	.	0	.
chr9	40581938	40582439	.	0	.
chr9	65545561	65546062	.	0	.
chr9	90245110	90245611	.	0	.
chr2	167537159	167537660	.	0	.
chr1	89575351	89575852	.	0	.
chr5	147747957	147748458	.	0	.
chr9	21367404	21367905	.	0	.
chr11	32542659	32543160	.	0	.
chr5	134214316	134214817	.	0	.
chr15	59783824	59784325	.	0	.
chr10	62509043	62509544	.	0	.
chr12	102646483	102646984	.	0	.
chr2	119262903	119263404	.	0	.
chr7	18884375	18884876	.	0	.
chr7	67461850	67462351	.	0	.
chr1	92048781	92049282	.	0	.
chr6	114893798	114894299	.	0	.
chr19	46511232	46511733	.	0	.
chr8	119423739	119424240	.	0	.
chr9	65542203	65542704	.	0	.
chr16	95708437	95708938	.	0	.
chr8	25067915	25068416	.	0	.
chr14	61861387	61861888	.	0	.
chr11	34782990	34783491	.	0	.
chr1	179045809	179046310	.	0	.
chr11	115188659	115189160	.	0	.
chr12	111159851	111160352	.	0	.
chr2	27025557	27026058	.	0	.
chr13	49200636	49201137	.	0	.
chr18	77796053	77796554	.	0	.
chr9	64811134	64811635	.	0	.
chr19	46339623	46340124	.	0	.
chr1	191269460	191269961	.	0	.
chr9	60999100	60999601	.	0	.
chr3	22075891	22076392	.	0	.
chr7	101382232	101382733	.	0	.
chr1	92052191	92052692	.	0	.
chr1	105965098	105965599	.	0	.
chr1	183264061	183264562	.	0	.
chr10	19691817	19692318	.	0	.
chr10	22165530	22166031	.	0	.
chr10	75565379	75565880	.	0	.
chr12	8521346	8521847	.	0	.
chr12	25311571	25312072	.	0	.
chr13	101663968	101664469	.	0	.
chr14	75186084	75186585	.	0	.
chr15	59785855	59786356	.	0	.
chr15	99030013	99030514	.	0	.
chr16	92715417	92715918	.	0	.
chr17	83846230	83846731	.	0	.
chr18	39020757	39021258	.	0	.
chr18	68159763	68160264	.	0	.
chr18	80738104	80738605	.	0	.
chr19	58087101	58087602	.	0	.
chr2	26476105	26476606	.	0	.
chr2	26493151	26493652	.	0	.
chr2	26549695	26550196	.	0	.
chr2	46370865	46371366	.	0	.
chr2	86175490	86175991	.	0	.
chr2	129373238	129373739	.	0	.
chr2	129592463	129592964	.	0	.
chr2	144720360	144720861	.	0	.
chr2	167925946	167926447	.	0	.
chr3	90695681	90696182	.	0	.
chr4	71291677	71292178	.	0	.
chr4	133169470	133169971	.	0	.
chr5	25529468	25529969	.	0	.
chr5	139286990	139287491	.	0	.
chr6	53448293	53448794	.	0	.
chr6	129233635	129234136	.	0	.
chr6	134115424	134115925	.	0	.
chr7	24978666	24979167	.	0	.
chr7	100950405	100950906	.	0	.
chr8	88635877	88636378	.	0	.
chr9	44582332	44582833	.	0	.
chr9	56104296	56104797	.	0	.
chr9	63721553	63722054	.	0	.
chr2	148397207	148397708	.	0	.
chr5	109558921	109559422	.	0	.
chr5	31697699	31698200	.	0	.
chr7	43544201	43544702	.	0	.
chr8	27177124	27177625	.	0	.
chr15	36608897	36609398	.	0	.
chr17	29394146	29394647	.	0	.
chr17	27555756	27556257	.	0	.
chr2	44952811	44953312	.	0	.
chr12	112619732	112620233	.	0	.
chr13	49213494	49213995	.	0	.
chr5	115542603	115543104	.	0	.
chr7	16239761	16240262	.	0	.
chr14	103046791	103047292	.	0	.
chr7	100964172	100964673	.	0	.
chr1	91459053	91459554	.	0	.
chr8	92853021	92853522	.	0	.
chr11	86577077	86577578	.	0	.
chr17	84118136	84118637	.	0	.
chr5	139404872	139405373	.	0	.
chr2	167752784	167753285	.	0	.
chr5	32191984	32192485	.	0	.
chr10	96332632	96333133	.	0	.
chr17	34000091	34000592	.	0	.
chr13	80885956	80886457	.	0	.
chr1	74167071	74167572	.	0	.
chr10	22353792	22354293	.	0	.
chr10	43684627	43685128	.	0	.
chr10	96374483	96374984	.	0	.
chr11	118318809	118319310	.	0	.
chr13	55528326	55528827	.	0	.
chr13	55895403	55895904	.	0	.
chr14	103007787	103008288	.	0	.
chr15	59807673	59808174	.	0	.
chr15	83009451	83009952	.	0	.
chr15	91643664	91644165	.	0	.
chr16	89848520	89849021	.	0	.
chr17	29394755	29395256	.	0	.
chr18	46447491	46447992	.	0	.
chr2	29792788	29793289	.	0	.
chr2	91087498	91087999	.	0	.
chr2	117996518	117997019	.	0	.
chr2	148522047	148522548	.	0	.
chr2	166655600	166656101	.	0	.
chr2	174437739	174438240	.	0	.
chr3	83839432	83839933	.	0	.
chr3	107853881	107854382	.	0	.
chr4	46643369	46643870	.	0	.
chr5	3501550	3502051	.	0	.
chr5	90881520	90882021	.	0	.
chr5	136217023	136217524	.	0	.
chr5	137263674	137264175	.	0	.
chr6	72548939	72549440	.	0	.
chr6	113662920	113663421	.	0	.
chr6	124505053	124505554	.	0	.
chr6	124730137	124730638	.	0	.
chr7	28440782	28441283	.	0	.
chr7	83655111	83655612	.	0	.
chr7	122402028	122402529	.	0	.
chr7	127134680	127135181	.	0	.
chr8	83740965	83741466	.	0	.
chr8	121806167	121806668	.	0	.
chr9	47892945	47893446	.	0	.
chr3	135437881	135438382	.	0	.
chr2	178416358	178416859	.	0	.
chr11	109425346	109425847	.	0	.
chr10	43667590	43668091	.	0	.
chr17	26535144	26535645	.	0	.
chr12	111436481	111436982	.	0	.
chr2	45279297	45279798	.	0	.
chr12	79130535	79131036	.	0	.
chr17	35916508	35917009	.	0	.
chr7	63938888	63939389	.	0	.
chr4	145246654	145247155	.	0	.
chr11	86757739	86758240	.	0	.
chr1	180848463	180848964	.	0	.
chr15	77945655	77946156	.	0	.
chr7	78913593	78914094	.	0	.
chr5	134231359	134231860	.	0	.
chr9	90244581	90245082	.	0	.
chr4	132976522	132977023	.	0	.
chr19	5724506	5725007	.	0	.
chr7	64011754	64012255	.	0	.
chr8	126832493	126832994	.	0	.
chr6	86615219	86615720	.	0	.
chr19	53424528	53425029	.	0	.
chr14	79301344	79301845	.	0	.
chr12	86819091	86819592	.	0	.
chr4	152296933	152297434	.	0	.
chr1	72106626	72107127	.	0	.
chr1	171390073	171390574	.	0	.
chr1	193201281	193201782	.	0	.
chr10	60369324	60369825	.	0	.
chr10	81298692	81299193	.	0	.
chr10	94844658	94845159	.	0	.
chr10	99459972	99460473	.	0	.
chr10	121376850	121377351	.	0	.
chr11	69410522	69411023	.	0	.
chr11	71251365	71251866	.	0	.
chr12	54164607	54165108	.	0	.
chr12	80060733	80061234	.	0	.
chr12	84243072	84243573	.	0	.
chr13	51734487	51734988	.	0	.
chr13	83609032	83609533	.	0	.
chr13	113486459	113486960	.	0	.
chr15	25842936	25843437	.	0	.
chr15	78588880	78589381	.	0	.
chr17	48167047	48167548	.	0	.
chr17	84100558	84101059	.	0	.
chr2	129360203	129360704	.	0	.
chr2	132607605	132608106	.	0	.
chr2	157447705	157448206	.	0	.
chr3	83885166	83885667	.	0	.
chr3	121693003	121693504	.	0	.
chr4	95105923	95106424	.	0	.
chr4	126017543	126018044	.	0	.
chr4	141558583	141559084	.	0	.
chr5	4530098	4530599	.	0	.
chr5	137871510	137872011	.	0	.
chr5	149266807	149267308	.	0	.
chr6	31079483	31079984	.	0	.
chr6	90753858	90754359	.	0	.
chr6	125445200	125445701	.	0	.
chr6	134064927	134065428	.	0	.
chr6	143868044	143868545	.	0	.
chr7	19272348	19272849	.	0	.
chr7	31002671	31003172	.	0	.
chr7	34214498	34214999	.	0	.
chr7	100495670	100496171	.	0	.
chr7	127922226	127922727	.	0	.
chr8	3664300	3664801	.	0	.
chr8	70615834	70616335	.	0	.
chr8	126852177	126852678	.	0	.
chr9	61385765	61386266	.	0	.
chr9	90242846	90243347	.	0	.
chr9	96649836	96650337	.	0	.
chr9	61702272	61702773	.	0	.
chr1	87620103	87620604	.	0	.
chr8	84661478	84661979	.	0	.
chr11	69098503	69099004	.	0	.
chr15	59728071	59728572	.	0	.
chr11	103249432	103249933	.	0	.
chr2	26444986	26445487	.	0	.
chr2	44927200	44927701	.	0	.
chr1	125435259	125435760	.	0	.
chr1	131084196	131084697	.	0	.
chr7	24450461	24450962	.	0	.
chr2	22774102	22774603	.	0	.
chr1	105990056	105990557	.	0	.
chr19	41801721	41802222	.	0	.
chr15	73117888	73118389	.	0	.
chr18	54978650	54979151	.	0	.
chr6	115519124	115519625	.	0	.
chr8	88633338	88633839	.	0	.
chr11	76587923	76588424	.	0	.
chr9	63737942	63738443	.	0	.
chr10	75564821	75565322	.	0	.
chr8	120109121	120109622	.	0	.
chr7	43643151	43643652	.	0	.
chr9	57561672	57562173	.	0	.
chr4	117117963	117118464	.	0	.
chr8	18924987	18925488	.	0	.
chr10	118804517	118805018	.	0	.
chr4	132494460	132494961	.	0	.
chr7	141008250	141008751	.	0	.
chr13	13525796	13526297	.	0	.
chr17	31835602	31836103	.	0	.
chr15	59652686	59653187	.	0	.
chr16	93914146	93914647	.	0	.
chr19	46985082	46985583	.	0	.
chr9	110653994	110654495	.	0	.
chr1	105981154	105981655	.	0	.
chr1	128705211	128705712	.	0	.
chr10	63637890	63638391	.	0	.
chr10	67048864	67049365	.	0	.
chr10	77266162	77266663	.	0	.
chr10	95634147	95634648	.	0	.
chr10	95779612	95780113	.	0	.
chr10	96273882	96274383	.	0	.
chr11	70436954	70437455	.	0	.
chr11	74575852	74576353	.	0	.
chr11	97142005	97142506	.	0	.
chr11	98710339	98710840	.	0	.
chr11	98952681	98953182	.	0	.
chr11	114890082	114890583	.	0	.
chr12	52307575	52308076	.	0	.
chr12	112688278	112688779	.	0	.
chr12	112864773	112865274	.	0	.
chr13	43250540	43251041	.	0	.
chr15	25831275	25831776	.	0	.
chr16	36934778	36935279	.	0	.
chr17	26531817	26532318	.	0	.
chr17	57078259	57078760	.	0	.
chr17	73952152	73952653	.	0	.
chr19	5815784	5816285	.	0	.
chr19	53194085	53194586	.	0	.
chr2	24103832	24104333	.	0	.
chr2	24311545	24312046	.	0	.
chr2	90490601	90491102	.	0	.
chr2	91084454	91084955	.	0	.
chr2	126602199	126602700	.	0	.
chr2	128294795	128295296	.	0	.
chr3	107853376	107853877	.	0	.
chr4	8853999	8854500	.	0	.
chr4	130913039	130913540	.	0	.
chr4	134099199	134099700	.	0	.
chr5	36562996	36563497	.	0	.
chr5	113644231	113644732	.	0	.
chr5	123126036	123126537	.	0	.
chr6	53369802	53370303	.	0	.
chr6	92012928	92013429	.	0	.
chr6	134189487	134189988	.	0	.
chr7	30412635	30413136	.	0	.
chr7	126703991	126704492	.	0	.
chr9	44461869	44462370	.	0	.
chr9	87510629	87511130	.	0	.
chr17	87326944	87327445	.	0	.
chr11	87750884	87751385	.	0	.
chr11	87737192	87737693	.	0	.
chr3	142394628	142395129	.	0	.
chr1	128590701	128591202	.	0	.
chr5	125389523	125390024	.	0	.
chr5	31602287	31602788	.	0	.
chr11	69413965	69414466	.	0	.
chr19	5845642	5846143	.	0	.
chr11	115277344	115277845	.	0	.
chr16	93711561	93712062	.	0	.
chr13	83572034	83572535	.	0	.
chr17	56584059	56584560	.	0	.
chr4	132973858	132974359	.	0	.
chr4	133353300	133353801	.	0	.
chr5	148739074	148739575	.	0	.
chr6	67532272	67532773	.	0	.
chr9	44513016	44513517	.	0	.
chr9	123941330	123941831	.	0	.
chr12	54998999	54999500	.	0	.
chr2	68825282	68825783	.	0	.
chr6	90740621	90741122	.	0	.
chr7	128392264	128392765	.	0	.
chr7	139992372	139992873	.	0	.
chr3	90589438	90589939	.	0	.
chr3	94587860	94588361	.	0	.
chr7	139974192	139974693	.	0	.
chr3	88422177	88422678	.	0	.
chr1	180387420	180387921	.	0	.
chr5	115516580	115517081	.	0	.
chr1	136685104	136685605	.	0	.
chr11	5949524	5950025	.	0	.
chr5	3494385	3494886	.	0	.
chr2	158174376	158174877	.	0	.
chr11	69094891	69095392	.	0	.
chr2	91947752	91948253	.	0	.
chr16	32102182	32102683	.	0	.
chr13	113600988	113601489	.	0	.
chr10	60348887	60349388	.	0	.
chr11	102431988	102432489	.	0	.
chr8	83739893	83740394	.	0	.
chr11	97127043	97127544	.	0	.
chr6	42353210	42353711	.	0	.
chr4	63399174	63399675	.	0	.
chr2	129593854	129594355	.	0	.
chr4	155562123	155562624	.	0	.
chr6	115759099	115759600	.	0	.
chr11	103115924	103116425	.	0	.
chr1	9997462	9997963	.	0	.
chr1	53850858	53851359	.	0	.
chr1	72428488	72428989	.	0	.
chr1	91057510	91058011	.	0	.
chr1	128724716	128725217	.	0	.
chr1	162006083	162006584	.	0	.
chr1	187000297	187000798	.	0	.
chr1	191280647	191281148	.	0	.
chr10	43856303	43856804	.	0	.
chr12	103343431	103343932	.	0	.
chr13	6889264	6889765	.	0	.
chr13	41486830	41487331	.	0	.
chr13	52985382	52985883	.	0	.
chr14	20785199	20785700	.	0	.
chr15	59721531	59722032	.	0	.
chr15	99497914	99498415	.	0	.
chr16	38395413	38395914	.	0	.
chr16	91366578	91367079	.	0	.
chr17	29393618	29394119	.	0	.
chr17	31915562	31916063	.	0	.
chr17	34639481	34639982	.	0	.
chr17	63043250	63043751	.	0	.
chr18	80691731	80692232	.	0	.
chr19	18602824	18603325	.	0	.
chr2	11332402	11332903	.	0	.
chr2	22773363	22773864	.	0	.
chr2	34977092	34977593	.	0	.
chr2	60071729	60072230	.	0	.
chr2	90542676	90543177	.	0	.
chr2	102948430	102948931	.	0	.
chr2	129369891	129370392	.	0	.
chr2	131509625	131510126	.	0	.
chr2	140784618	140785119	.	0	.
chr3	84678748	84679249	.	0	.
chr3	121571418	121571919	.	0	.
chr4	132793894	132794395	.	0	.
chr5	20941160	20941661	.	0	.
chr5	99336321	99336822	.	0	.
chr5	122843739	122844240	.	0	.
chr5	136171338	136171839	.	0	.
chr5	137872420	137872921	.	0	.
chr6	40890855	40891356	.	0	.
chr6	87540953	87541454	.	0	.
chr6	90787060	90787561	.	0	.
chr6	146170717	146171218	.	0	.
chr7	104370052	104370553	.	0	.
chr7	117428834	117429335	.	0	.
chr7	122260058	122260559	.	0	.
chr8	35430583	35431084	.	0	.
chr8	94365531	94366032	.	0	.
chr8	121796349	121796850	.	0	.
chr8	126802529	126803030	.	0	.
chr8	126831960	126832461	.	0	.
chr9	57650836	57651337	.	0	.
chr9	60991465	60991966	.	0	.
chr9	70942581	70943082	.	0	.
chr9	88273320	88273821	.	0	.
chr9	123936493	123936994	.	0	.
chr2	122028355	122028856	.	0	.
chr15	99029501	99030002	.	0	.
chr2	167753373	167753874	.	0	.
chr5	23433147	23433648	.	0	.
chr15	59648404	59648905	.	0	.
chr9	122351469	122351970	.	0	.
chr8	121580349	121580850	.	0	.
chr7	28436846	28437347	.	0	.
chr15	38518052	38518553	.	0	.
chr5	43233563	43234064	.	0	.
chr5	38560734	38561235	.	0	.
chr8	84198263	84198764	.	0	.
chr6	145340662	145341163	.	0	.
chr18	35942101	35942602	.	0	.
chr12	55489018	55489519	.	0	.
chr13	89889090	89889591	.	0	.
chr15	9748619	9749120	.	0	.
chr15	78246125	78246626	.	0	.
chr12	25251618	25252119	.	0	.
chr2	167335062	167335563	.	0	.
chr10	80692083	80692584	.	0	.
chr5	150118313	150118814	.	0	.
chr17	84126122	84126623	.	0	.
chr19	46339119	46339620	.	0	.
chr11	115153821	115154322	.	0	.
chr11	103258110	103258611	.	0	.
chr7	28378254	28378755	.	0	.
chr9	65535986	65536487	.	0	.
chr15	78596829	78597330	.	0	.
chr4	45949034	45949535	.	0	.
chr2	128429172	128429673	.	0	.
chr4	3677888	3678389	.	0	.
chr2	60901329	60901830	.	0	.
chr9	57956798	57957299	.	0	.
chr13	54693754	54694255	.	0	.
chr11	97659369	97659870	.	0	.
chrX	96130138	96130639	.	0	.
chr11	43385269	43385770	.	0	.
chr15	101374841	101375342	.	0	.
chr7	30422974	30423475	.	0	.
chr1	87621342	87621843	.	0	.
chr16	4969377	4969878	.	0	.
chr1	180390199	180390700	.	0	.
chr1	39578453	39578954	.	0	.
chr1	51508958	51509459	.	0	.
chr1	131092183	131092684	.	0	.
chr1	171017390	171017891	.	0	.
chr1	184617654	184618155	.	0	.
chr1	186508278	186508779	.	0	.
chr10	10732995	10733496	.	0	.
chr10	77520503	77521004	.	0	.
chr10	80016381	80016882	.	0	.
chr10	84508591	84509092	.	0	.
chr10	111996396	111996897	.	0	.
chr10	121497945	121498446	.	0	.
chr11	28362925	28363426	.	0	.
chr11	53805728	53806229	.	0	.
chr11	54155832	54156333	.	0	.
chr11	69930964	69931465	.	0	.
chr11	80504864	80505365	.	0	.
chr11	90225109	90225610	.	0	.
chr11	114907517	114908018	.	0	.
chr12	17715629	17716130	.	0	.
chr12	70226917	70227418	.	0	.
chr13	9093577	9094078	.	0	.
chr13	41468240	41468741	.	0	.
chr13	45108931	45109432	.	0	.
chr13	49187817	49188318	.	0	.
chr13	95685629	95686130	.	0	.
chr13	113436194	113436695	.	0	.
chr13	117235472	117235973	.	0	.
chr14	21808129	21808630	.	0	.
chr14	27351377	27351878	.	0	.
chr14	31389778	31390279	.	0	.
chr14	31392040	31392541	.	0	.
chr14	72783091	72783592	.	0	.
chr14	75174693	75175194	.	0	.
chr14	75176640	75177141	.	0	.
chr15	27709166	27709667	.	0	.
chr15	84994429	84994930	.	0	.
chr16	24076421	24076922	.	0	.
chr16	92824692	92825193	.	0	.
chr17	29510656	29511157	.	0	.
chr17	31594537	31595038	.	0	.
chr17	33555445	33555946	.	0	.
chr17	34032829	34033330	.	0	.
chr17	57346995	57347496	.	0	.
chr18	54970809	54971310	.	0	.
chr18	80611707	80612208	.	0	.
chr19	17278372	17278873	.	0	.
chr19	40637536	40638037	.	0	.
chr19	40639326	40639827	.	0	.
chr19	41369774	41370275	.	0	.
chr19	46655610	46656111	.	0	.
chr2	29772364	29772865	.	0	.
chr2	38485858	38486359	.	0	.
chr2	91083465	91083966	.	0	.
chr2	131196430	131196931	.	0	.
chr2	132020952	132021453	.	0	.
chr2	132094358	132094859	.	0	.
chr2	132595817	132596318	.	0	.
chr2	167772777	167773278	.	0	.
chr2	167949161	167949662	.	0	.
chr2	174613918	174614419	.	0	.
chr3	95658449	95658950	.	0	.
chr4	46635884	46636385	.	0	.
chr4	128981139	128981640	.	0	.
chr4	134097970	134098471	.	0	.
chr4	137365546	137366047	.	0	.
chr5	31956384	31956885	.	0	.
chr5	90696100	90696601	.	0	.
chr5	113805249	113805750	.	0	.
chr6	31080545	31081046	.	0	.
chr6	72139438	72139939	.	0	.
chr6	87502819	87503320	.	0	.
chr6	113654060	113654561	.	0	.
chr6	113677291	113677792	.	0	.
chr6	117675075	117675576	.	0	.
chr6	124273192	124273693	.	0	.
chr6	134120727	134121228	.	0	.
chr7	3897958	3898459	.	0	.
chr7	38189382	38189883	.	0	.
chr7	48908646	48909147	.	0	.
chr7	73572515	73573016	.	0	.
chr7	110823594	110824095	.	0	.
chr7	117482660	117483161	.	0	.
chr8	71296289	71296790	.	0	.
chr9	32508607	32509108	.	0	.
chr9	44104772	44105273	.	0	.
chr9	89198999	89199500	.	0	.
chr9	110415155	110415656	.	0	.
chrX	73911526	73912027	.	0	.
chrX	74243630	74244131	.	0	.
chr5	142908076	142908577	.	0	.
chr9	45268918	45269419	.	0	.
chr19	29241527	29242028	.	0	.
chr1	53823495	53823996	.	0	.
chr9	58581988	58582489	.	0	.
chr11	65806924	65807425	.	0	.
chr11	69881335	69881836	.	0	.
chr11	75653292	75653793	.	0	.
chr5	137502323	137502824	.	0	.
chr7	100856431	100856932	.	0	.
chr5	23386797	23387298	.	0	.
chr18	61108379	61108880	.	0	.
chr15	59648917	59649418	.	0	.
chr14	75844853	75845354	.	0	.
chr4	109117873	109118374	.	0	.
chr7	102250634	102251135	.	0	.
chr15	31349872	31350373	.	0	.
chr17	71257038	71257539	.	0	.
chr17	84140784	84141285	.	0	.
chr2	80079529	80080030	.	0	.
chr2	174436220	174436721	.	0	.
chr11	72953747	72954248	.	0	.
chr19	10738710	10739211	.	0	.
chr2	91086215	91086716	.	0	.
chr15	77800523	77801024	.	0	.
chr1	131188538	131189039	.	0	.
chr10	80017322	80017823	.	0	.
chr2	172384767	172385268	.	0	.
chr4	102623957	102624458	.	0	.
chr13	49298297	49298798	.	0	.
chr8	119826459	119826960	.	0	.
chr5	137533060	137533561	.	0	.
chr11	54935959	54936460	.	0	.
chr7	140954072	140954573	.	0	.
chr17	28180726	28181227	.	0	.
chr7	101028215	101028716	.	0	.
chr7	142397880	142398381	.	0	.
chr11	70679931	70680432	.	0	.
chr11	115189202	115189703	.	0	.
chr6	67534968	67535469	.	0	.
chr19	6278780	6279281	.	0	.
chr11	97435735	97436236	.	0	.
chr17	26605481	26605982	.	0	.
chr2	132578037	132578538	.	0	.
chr6	137558721	137559222	.	0	.
chr5	25081452	25081953	.	0	.
chr19	24166334	24166835	.	0	.
chr4	132075078	132075579	.	0	.
chr7	19257333	19257834	.	0	.
chr7	67425550	67426051	.	0	.
chr15	79409289	79409790	.	0	.
chr9	44562812	44563313	.	0	.
chr5	135713293	135713794	.	0	.
chr7	3915367	3915868	.	0	.
chr8	123280321	123280822	.	0	.
chr11	11685890	11686391	.	0	.
chr1	39579037	39579538	.	0	.
chr1	87659227	87659728	.	0	.
chr1	165691401	165691902	.	0	.
chr1	171849438	171849939	.	0	.
chr10	7063481	7063982	.	0	.
chr10	93095128	93095629	.	0	.
chr10	98880048	98880549	.	0	.
chr10	121488609	121489110	.	0	.
chr11	76261136	76261637	.	0	.
chr11	76879749	76880250	.	0	.
chr11	114883209	114883710	.	0	.
chr11	115138887	115139388	.	0	.
chr12	70102323	70102824	.	0	.
chr12	70219130	70219631	.	0	.
chr12	70233556	70234057	.	0	.
chr12	102648111	102648612	.	0	.
chr13	38009992	38010493	.	0	.
chr13	51739682	51740183	.	0	.
chr13	59242545	59243046	.	0	.
chr13	110568472	110568973	.	0	.
chr14	25861814	25862315	.	0	.
chr14	118674593	118675094	.	0	.
chr15	25940459	25940960	.	0	.
chr15	76274612	76275113	.	0	.
chr15	78245232	78245733	.	0	.
chr15	101262386	101262887	.	0	.
chr16	93913617	93914118	.	0	.
chr17	24171726	24172227	.	0	.
chr17	35259028	35259529	.	0	.
chr17	44654452	44654953	.	0	.
chr17	48146062	48146563	.	0	.
chr17	49009642	49010143	.	0	.
chr17	50993561	50994062	.	0	.
chr17	57289973	57290474	.	0	.
chr17	84135268	84135769	.	0	.
chr17	84181537	84182038	.	0	.
chr18	54838990	54839491	.	0	.
chr18	56732910	56733411	.	0	.
chr19	32935598	32936099	.	0	.
chr19	32960368	32960869	.	0	.
chr19	40708145	40708646	.	0	.
chr19	46517362	46517863	.	0	.
chr2	24344935	24345436	.	0	.
chr2	28517296	28517797	.	0	.
chr2	32716597	32717098	.	0	.
chr2	118013033	118013534	.	0	.
chr2	132019264	132019765	.	0	.
chr2	167776484	167776985	.	0	.
chr2	178497407	178497908	.	0	.
chr2	181090061	181090562	.	0	.
chr3	9852998	9853499	.	0	.
chr3	15275852	15276353	.	0	.
chr3	40500342	40500843	.	0	.
chr3	105900605	105901106	.	0	.
chr4	8912617	8913118	.	0	.
chr4	55623311	55623812	.	0	.
chr4	58288683	58289184	.	0	.
chr4	59435958	59436459	.	0	.
chr4	102517223	102517724	.	0	.
chr4	134094870	134095371	.	0	.
chr4	134924306	134924807	.	0	.
chr5	137631086	137631587	.	0	.
chr6	50377585	50378086	.	0	.
chr6	108517778	108518279	.	0	.
chr6	134802657	134803158	.	0	.
chr7	24838774	24839275	.	0	.
chr7	27357519	27358020	.	0	.
chr7	101011268	101011769	.	0	.
chr7	127090597	127091098	.	0	.
chr7	140999230	140999731	.	0	.
chr8	3660801	3661302	.	0	.
chr8	13354186	13354687	.	0	.
chr8	109578797	109579298	.	0	.
chr9	32509780	32510281	.	0	.
chr9	44986949	44987450	.	0	.
chr9	61022270	61022771	.	0	.
chr11	62576461	62576962	.	0	.
chr12	76318959	76319460	.	0	.
chr19	5846491	5846992	.	0	.
chr17	56672939	56673440	.	0	.
chr2	29191121	29191622	.	0	.
[truncated: 1,483 more rows]
