# Supplementary material for: The single-cell chromatin accessibility landscape in mouse perinatal testis development
Source: eLife journal article supplement (doi:10.7554/elife.75624), 2023-04-25
Supplement: supp [file elife-75624-supp-v1.zip › elife_poa_e75624_Supplementary_file_5.xlsx]

## Sheet: Summary
peak	gene	Correlation	FDR	VarQATAC	VarQRNA	cluster
chr1:9982940-9983440	Ppp1r42	0.59035	4.75164e-46	0.262028	0.251204	1
chr1:9991741-9992241	Ppp1r42	0.869738	1.47232e-150	0.91282	0.251204	1
chr1:9992245-9992745	Ppp1r42	0.791669	3.32049e-105	0.596566	0.251204	1
chr1:9997463-9997963	Ppp1r42	0.84865	8.04431e-136	0.74	0.251204	1
chr1:23380064-23380564	Ogfrl1	0.823163	9.11627e-121	0.704328	0.867766	1
chr1:34464580-34465080	Ptpn18	0.806345	4.20717e-112	0.370529	0.973134	1
chr1:36052535-36053035	Neurl3	0.771169	1.87952e-96	0.459799	0.525024	1
chr1:36162697-36163197	Neurl3	0.6888	7.59619e-69	0.304963	0.525024	1
chr1:36261999-36262499	Neurl3	0.647732	2.69637e-58	0.790942	0.525024	1
chr1:36263963-36264463	Neurl3	0.546708	2.84144e-38	0.442511	0.525024	1
chr1:36271607-36272107	Neurl3	0.65793	9.23632e-61	0.418941	0.525024	1
chr1:36273311-36273811	Neurl3	0.580337	3.68834e-44	0.858572	0.525024	1
chr1:36308238-36308738	Neurl3	0.586584	2.48654e-45	0.814946	0.525024	1
chr1:36261999-36262499	Cnnm4	0.513873	3.83908e-33	0.790942	0.323471	1
chr1:36271607-36272107	Cnnm4	0.527961	2.82928e-35	0.418941	0.323471	1
chr1:36947764-36948264	Zap70	0.604793	6.76089e-49	0.326415	0.333163	1
chr1:36962286-36962786	Zap70	0.604661	7.19039e-49	0.400746	0.333163	1
chr1:37586041-37586541	Mgat4a	0.678675	4.39302e-66	0.657059	0.360313	1
chr1:40051144-40051644	Il1r2	0.595887	4.0114e-47	0.723339	0.311568	1
chr1:40083085-40083585	Il1r2	0.564308	2.86796e-41	0.418565	0.311568	1
chr1:40084414-40084914	Il1r2	0.595669	4.42246e-47	0.914198	0.311568	1
chr1:40294900-40295400	Il18rap	0.791509	3.92213e-105	0.540963	0.287876	1
chr1:40355886-40356386	Il18rap	0.5335	3.84867e-36	0.640506	0.287876	1
chr1:40392745-40393245	Il18rap	0.85611	9.2044e-141	0.332251	0.287876	1
chr1:40393262-40393762	Il18rap	0.694117	2.42217e-70	0.254106	0.287876	1
chr1:40501957-40502457	Il18rap	0.932066	3.86296e-216	0.703112	0.287876	1
chr1:51508959-51509459	Nabp1	0.538444	6.28116e-37	0.809222	0.85711	1
chr1:52655131-52655631	Mfsd6	0.570862	1.97578e-42	0.763039	0.371989	1
chr1:52800159-52800659	Mfsd6	0.556598	6.19824e-40	0.654462	0.371989	1
chr1:52652502-52653002	Inpp1	0.583323	1.02397e-44	0.26986	0.534773	1
chr1:52655131-52655631	Inpp1	0.634401	3.2316e-55	0.763039	0.534773	1
chr1:52800159-52800659	Inpp1	0.553869	1.80182e-39	0.654462	0.534773	1
chr1:53823496-53823996	Stk17b	0.636701	9.74657e-56	0.830997	0.854447	1
chr1:53824884-53825384	Stk17b	0.683177	2.68389e-67	0.69781	0.854447	1
chr1:53850859-53851359	Stk17b	0.818019	5.0576e-118	0.857334	0.854447	1
chr1:58742999-58743499	Casp8	0.54954	9.62133e-39	0.466645	0.786601	1
chr1:58802338-58802838	Casp8	0.611048	3.54874e-50	0.659939	0.786601	1
chr1:58802338-58802838	Stradb	0.601784	2.72639e-48	0.659939	0.485065	1
chr1:74153707-74154207	Cxcr2	0.782441	3.78767e-101	0.623989	0.764893	1
chr1:74155489-74155989	Cxcr2	0.775786	2.41826e-98	0.569135	0.764893	1
chr1:74167072-74167572	Cxcr2	0.898045	5.59616e-175	0.838457	0.764893	1
chr1:74227221-74227721	Cxcr2	0.849911	1.22121e-136	0.629915	0.764893	1
chr1:74374986-74375486	Cxcr2	0.742703	1.03331e-85	0.937735	0.764893	1
chr1:74381374-74381874	Cxcr2	0.690665	2.29453e-69	0.684024	0.764893	1
chr1:74167072-74167572	Arpc2	0.576837	1.62819e-43	0.838457	0.963725	1
chr1:74227221-74227721	Arpc2	0.644513	1.54206e-57	0.629915	0.963725	1
chr1:74374986-74375486	Arpc2	0.602114	2.34208e-48	0.937735	0.963725	1
chr1:74381374-74381874	Arpc2	0.550285	7.22518e-39	0.684024	0.963725	1
chr1:74155489-74155989	Slc11a1	0.635204	2.12818e-55	0.569135	0.726067	1
chr1:74167072-74167572	Slc11a1	0.597584	1.86185e-47	0.838457	0.726067	1
chr1:74227221-74227721	Slc11a1	0.746255	5.66454e-87	0.629915	0.726067	1
chr1:74368742-74369242	Slc11a1	0.738085	4.17673e-84	0.694418	0.726067	1
chr1:74374986-74375486	Slc11a1	0.903211	3.32358e-180	0.937735	0.726067	1
chr1:74381374-74381874	Slc11a1	0.791149	5.69784e-105	0.684024	0.726067	1
chr1:74437960-74438460	Slc11a1	0.518948	6.72627e-34	0.403694	0.726067	1
chr1:75187802-75188302	Cnppd1	0.607071	2.32843e-49	0.869154	0.584651	1
chr1:75217888-75218388	Cnppd1	0.570848	1.98716e-42	0.704462	0.584651	1
chr1:75187802-75188302	Atg9a	0.504788	8.04729e-32	0.869154	0.632319	1
chr1:75169588-75170088	Tuba4a	0.501344	2.49423e-31	0.508292	0.923426	1
chr1:75187802-75188302	Tuba4a	0.903199	3.41377e-180	0.869154	0.923426	1
chr1:75192398-75192898	Tuba4a	0.57369	6.10483e-43	0.912484	0.923426	1
chr1:75213116-75213616	Tuba4a	0.766996	8.75391e-95	0.797648	0.923426	1
chr1:75217888-75218388	Tuba4a	0.710404	3.87248e-75	0.704462	0.923426	1
chr1:75219043-75219543	Tuba4a	0.609267	8.26552e-50	0.961829	0.923426	1
chr1:85703474-85703974	Sp110	0.717057	3.39513e-77	0.979302	0.606473	1
chr1:85735665-85736165	Sp110	0.788886	5.84444e-104	0.640358	0.606473	1
chr1:85703474-85703974	Sp140	0.781177	1.31523e-100	0.979302	0.801564	1
chr1:85735665-85736165	Sp140	0.75724	5.17488e-91	0.640358	0.801564	1
chr1:85751450-85751950	Sp140	0.501217	2.59945e-31	0.854701	0.801564	1
chr1:85837925-85838425	Sp140	0.543073	1.1202e-37	0.273611	0.801564	1
chr1:85703474-85703974	Sp100	0.717979	1.744e-77	0.979302	0.537097	1
chr1:85735665-85736165	Sp100	0.808271	4.75755e-113	0.640358	0.537097	1
chr1:85703474-85703974	A630001G21Rik	0.663287	4.28154e-62	0.979302	0.293374	1
chr1:85735665-85736165	A630001G21Rik	0.765329	3.97116e-94	0.640358	0.293374	1
chr1:85960823-85961323	A630001G21Rik	0.655582	3.48154e-60	0.712151	0.293374	1
chr1:85977663-85978163	A630001G21Rik	0.67557	2.93773e-65	0.434858	0.293374	1
chr1:87607536-87608036	Inpp5d	0.68681	2.7073e-68	0.545517	0.676926	1
chr1:87620104-87620604	Inpp5d	0.828397	1.1746e-123	0.904705	0.676926	1
chr1:87620774-87621274	Inpp5d	0.625299	3.36141e-53	0.578273	0.676926	1
chr1:87621343-87621843	Inpp5d	0.762706	4.20272e-93	0.841279	0.676926	1
chr1:87625215-87625715	Inpp5d	0.648927	1.40344e-58	0.311185	0.676926	1
chr1:87626383-87626883	Inpp5d	0.898527	1.87029e-175	0.94332	0.676926	1
chr1:87636856-87637356	Inpp5d	0.562459	6.03868e-41	0.282834	0.676926	1
chr1:87637453-87637953	Inpp5d	0.795209	8.08305e-107	0.910057	0.676926	1
chr1:87640221-87640721	Inpp5d	0.720131	3.63624e-78	0.681041	0.676926	1
chr1:87650589-87651089	Inpp5d	0.7798	5.05022e-100	0.79903	0.676926	1
chr1:87657905-87658405	Inpp5d	0.740066	8.61981e-85	0.251109	0.676926	1
chr1:87659228-87659728	Inpp5d	0.675791	2.56824e-65	0.755481	0.676926	1
chr1:87828207-87828707	Inpp5d	0.835813	6.42184e-128	0.873815	0.676926	1
chr1:87607536-87608036	Atg16l1	0.740948	4.25179e-85	0.545517	0.657485	1
chr1:87620104-87620604	Atg16l1	0.681404	8.12824e-67	0.904705	0.657485	1
chr1:87620774-87621274	Atg16l1	0.516007	1.85202e-33	0.578273	0.657485	1
chr1:87636856-87637356	Atg16l1	0.509403	1.73505e-32	0.282834	0.657485	1
chr1:88556451-88556951	Arl4c	0.613415	1.14349e-50	0.322278	0.860511	1
chr1:88567127-88567627	Arl4c	0.622605	1.28684e-52	0.271399	0.860511	1
chr1:88576092-88576592	Arl4c	0.697554	2.50313e-71	0.706903	0.860511	1
chr1:88584362-88584862	Arl4c	0.675507	3.05269e-65	0.503546	0.860511	1
chr1:88586530-88587030	Arl4c	0.660381	2.28406e-61	0.517488	0.860511	1
chr1:88587254-88587754	Arl4c	0.777763	3.64043e-99	0.954831	0.860511	1
chr1:88587880-88588380	Arl4c	0.593632	1.10206e-46	0.292344	0.860511	1
chr1:88588965-88589465	Arl4c	0.780621	2.26845e-100	0.678713	0.860511	1
chr1:88655055-88655555	Arl4c	0.718053	1.6522e-77	0.594328	0.860511	1
chr1:91037959-91038459	Lrrfip1	0.585989	3.22234e-45	0.550788	0.843847	1
chr1:91041592-91042092	Lrrfip1	0.644163	1.85994e-57	0.728646	0.843847	1
chr1:91053467-91053967	Lrrfip1	0.52243	2.00219e-34	0.94917	0.843847	1
chr1:91055687-91056187	Lrrfip1	0.528659	2.20548e-35	0.553488	0.843847	1
chr1:91056405-91056905	Lrrfip1	0.713224	5.27847e-76	0.902243	0.843847	1
chr1:91057511-91058011	Lrrfip1	0.71384	3.40592e-76	0.754054	0.843847	1
chr1:91064820-91065320	Lrrfip1	0.609498	7.41019e-50	0.712636	0.843847	1
chr1:91080171-91080671	Lrrfip1	0.76463	7.47293e-94	0.957029	0.843847	1
chr1:91220444-91220944	Lrrfip1	0.658655	6.11848e-61	0.46904	0.843847	1
chr1:90974926-90975426	Ramp1	0.59489	6.27565e-47	0.886932	0.818058	1
chr1:91037959-91038459	Ramp1	0.608281	1.31741e-49	0.550788	0.818058	1
chr1:91041592-91042092	Ramp1	0.747554	1.93011e-87	0.728646	0.818058	1
chr1:91052844-91053344	Ramp1	0.52006	4.57565e-34	0.993832	0.818058	1
chr1:91054856-91055356	Ramp1	0.5408	2.62098e-37	0.564398	0.818058	1
chr1:91056405-91056905	Ramp1	0.705361	1.28589e-73	0.902243	0.818058	1
chr1:91057511-91058011	Ramp1	0.790797	8.18519e-105	0.754054	0.818058	1
chr1:91064820-91065320	Ramp1	0.616689	2.35231e-51	0.712636	0.818058	1
chr1:91079604-91080104	Ramp1	0.60225	2.19883e-48	0.672033	0.818058	1
chr1:91080171-91080671	Ramp1	0.836623	2.13217e-128	0.957029	0.818058	1
chr1:91220444-91220944	Ramp1	0.616965	2.0562e-51	0.46904	0.818058	1
chr1:91251348-91251848	Ramp1	0.540937	2.49098e-37	0.560087	0.818058	1
chr1:91220444-91220944	Per2	0.543313	1.02395e-37	0.46904	0.43632	1
chr1:91437822-91438322	Per2	0.558332	3.12378e-40	0.754799	0.43632	1
chr1:105965099-105965599	Tnfrsf11a	0.597448	1.98109e-47	0.863439	0.483818	1
chr1:105981155-105981655	Tnfrsf11a	0.558573	2.83979e-40	0.636518	0.483818	1
chr1:107583832-107584332	Serpinb8	0.639247	2.55868e-56	0.578183	0.253018	1
chr1:120075455-120075955	Tmem37	0.636686	9.82229e-56	0.512971	0.808536	1
chr1:120099475-120099975	Tmem37	0.577119	1.44486e-43	0.622859	0.808536	1
chr1:125441580-125442080	Actr3	0.648618	1.66292e-58	0.55186	0.940543	1
chr1:128447122-128447622	Cxcr4	0.840704	7.62574e-131	0.829212	0.744885	1
chr1:128463433-128463933	Cxcr4	0.742538	1.18059e-85	0.667314	0.744885	1
chr1:128549318-128549818	Cxcr4	0.7594	7.83594e-92	0.414828	0.744885	1
chr1:128570012-128570512	Cxcr4	0.768679	1.8809e-95	0.873811	0.744885	1
chr1:128590702-128591202	Cxcr4	0.842068	1.11728e-131	0.917015	0.744885	1
chr1:128591412-128591912	Cxcr4	0.629948	3.19796e-54	0.852502	0.744885	1
chr1:128592128-128592628	Cxcr4	0.831777	1.42171e-125	0.981029	0.744885	1
chr1:128614481-128614981	Cxcr4	0.665723	1.03812e-62	0.441927	0.744885	1
chr1:128705212-128705712	Cxcr4	0.841965	1.29294e-131	0.792629	0.744885	1
chr1:128711547-128712047	Cxcr4	0.7393	1.58952e-84	0.416613	0.744885	1
chr1:128712727-128713227	Cxcr4	0.926206	1.05518e-207	0.993554	0.744885	1
chr1:128722013-128722513	Cxcr4	0.745013	1.57608e-86	0.664407	0.744885	1
chr1:128724717-128725217	Cxcr4	0.804252	4.41209e-111	0.692754	0.744885	1
chr1:128786765-128787265	Cxcr4	0.756348	1.12253e-90	0.737779	0.744885	1
chr1:131118957-131119457	Mapkapk2	0.507526	3.24813e-32	0.551393	0.792269	1
chr1:134063413-134063913	Chil1	0.516923	1.35202e-33	0.921214	0.852349	1
chr1:134065314-134065814	Chil1	0.806012	6.1236e-112	0.753803	0.852349	1
chr1:134093699-134094199	Chil1	0.79453	1.65654e-106	0.933572	0.852349	1
chr1:134094991-134095491	Chil1	0.502014	2.00318e-31	0.735855	0.852349	1
chr1:134105614-134106114	Chil1	0.733371	1.68872e-82	0.410705	0.852349	1
chr1:134106723-134107223	Chil1	0.509443	1.71202e-32	0.750066	0.852349	1
chr1:134182023-134182523	Chil1	0.704397	2.49316e-73	0.579874	0.852349	1
chr1:134189035-134189535	Chil1	0.525923	5.84645e-35	0.59575	0.852349	1
chr1:134420000-134420500	Chil1	0.572907	8.46104e-43	0.364962	0.852349	1
chr1:134093699-134094199	Ppfia4	0.739935	9.57205e-85	0.933572	0.458312	1
chr1:134094991-134095491	Ppfia4	0.705992	8.32532e-74	0.735855	0.458312	1
chr1:134420000-134420500	Ppfia4	0.646449	5.41698e-58	0.364962	0.458312	1
chr1:134196378-134196878	Adipor1	0.57616	2.16601e-43	0.922914	0.964632	1
chr1:135132879-135133379	Rnpep	0.50807	2.70933e-32	0.626694	0.849799	1
chr1:135410871-135411371	Rnpep	0.581257	2.48801e-44	0.313392	0.849799	1
chr1:138136096-138136596	Ptprc	0.536495	1.28932e-36	0.700779	0.894406	1
chr1:138191853-138192353	Ptprc	0.889485	6.6936e-167	0.699447	0.894406	1
chr1:138322946-138323446	Ptprc	0.790958	6.93234e-105	0.425181	0.894406	1
chr1:143916528-143917028	Rgs2	0.660692	1.91127e-61	0.784146	0.982146	1
chr1:143918281-143918781	Rgs2	0.547232	2.32793e-38	0.424087	0.982146	1
chr1:144002564-144003064	Rgs1	0.508582	2.28467e-32	0.501927	0.805872	1
chr1:152594751-152595251	Arpc5	0.596702	2.77788e-47	0.431287	0.959417	1
chr1:152768046-152768546	Arpc5	0.541391	2.10253e-37	0.503008	0.959417	1
chr1:152778989-152779489	Arpc5	0.505838	5.68679e-32	0.660101	0.959417	1
chr1:152798151-152798651	Arpc5	0.622807	1.16404e-52	0.634118	0.959417	1
chr1:152804871-152805371	Arpc5	0.596724	2.75081e-47	0.274903	0.959417	1
chr1:152807504-152808004	Arpc5	0.812323	4.43193e-115	0.925848	0.959417	1
chr1:152810715-152811215	Arpc5	0.669503	1.12007e-63	0.501357	0.959417	1
chr1:152832159-152832659	Arpc5	0.596596	2.91447e-47	0.507	0.959417	1
chr1:152837954-152838454	Arpc5	0.56405	3.18223e-41	0.412755	0.959417	1
chr1:152838773-152839273	Arpc5	0.592399	1.91097e-46	0.279658	0.959417	1
chr1:152768046-152768546	Ncf2	0.596257	3.39425e-47	0.503008	0.886754	1
chr1:152786789-152787289	Ncf2	0.556013	7.79536e-40	0.784002	0.886754	1
chr1:152798151-152798651	Ncf2	0.780533	2.47028e-100	0.634118	0.886754	1
chr1:152804871-152805371	Ncf2	0.681841	6.18731e-67	0.274903	0.886754	1
chr1:152807504-152808004	Ncf2	0.871439	7.35719e-152	0.925848	0.886754	1
chr1:152809804-152810304	Ncf2	0.630032	3.06395e-54	0.782248	0.886754	1
chr1:152810715-152811215	Ncf2	0.831115	3.40593e-125	0.501357	0.886754	1
chr1:152832159-152832659	Ncf2	0.708154	1.87052e-74	0.507	0.886754	1
chr1:152837954-152838454	Ncf2	0.538988	5.13608e-37	0.412755	0.886754	1
chr1:152838773-152839273	Ncf2	0.616738	2.29709e-51	0.279658	0.886754	1
chr1:155050210-155050710	Ier5	0.505722	5.90939e-32	0.98521	0.955847	1
chr1:156467557-156468057	Tor3a	0.609769	6.51878e-50	0.488693	0.49453	1
chr1:156615590-156616090	Tor3a	0.569	4.24793e-42	0.880504	0.49453	1
chr1:156921500-156922000	Tor3a	0.536984	1.07702e-36	0.624456	0.49453	1
chr1:164135276-164135776	Sell	0.940738	3.99028e-230	0.941167	0.457915	1
chr1:164135868-164136368	Sell	0.877172	2.19933e-156	0.774918	0.457915	1
chr1:164135276-164135776	F5	0.935198	5.72358e-221	0.941167	0.266508	1
chr1:164135868-164136368	F5	0.862371	3.94159e-145	0.774918	0.266508	1
chr1:165675243-165675743	Creg1	0.69979	5.63339e-72	0.480188	0.907045	1
chr1:165681086-165681586	Creg1	0.581365	2.3763e-44	0.564568	0.907045	1
chr1:165697505-165698005	Creg1	0.713222	5.28409e-76	0.620346	0.907045	1
chr1:165700817-165701317	Creg1	0.504977	7.55802e-32	0.649003	0.907045	1
chr1:170998272-170998772	Fcgr2b	0.77821	2.36601e-99	0.827493	0.759508	1
chr1:171016792-171017292	Fcgr2b	0.534752	2.44244e-36	0.347135	0.759508	1
chr1:171017391-171017891	Fcgr2b	0.744787	1.89628e-86	0.785855	0.759508	1
chr1:171019523-171020023	Fcgr2b	0.516053	1.82274e-33	0.273171	0.759508	1
chr1:171129176-171129676	Fcgr2b	0.590697	4.07427e-46	0.583791	0.759508	1
chr1:170998272-170998772	Fcgr4	0.77284	3.93779e-97	0.827493	0.41994	1
chr1:171016792-171017292	Fcgr4	0.735464	3.29765e-83	0.347135	0.41994	1
chr1:171017391-171017891	Fcgr4	0.906512	1.01336e-183	0.785855	0.41994	1
chr1:171019523-171020023	Fcgr4	0.618487	9.78723e-52	0.273171	0.41994	1
chr1:171231888-171232388	Fcgr4	0.719417	6.1248e-78	0.414514	0.41994	1
chr1:171234092-171234592	Fcgr4	0.909318	8.52656e-187	0.887645	0.41994	1
chr1:170998272-170998772	Fcgr3	0.781875	6.62547e-101	0.827493	0.959644	1
chr1:171016792-171017292	Fcgr3	0.550327	7.1102e-39	0.347135	0.959644	1
chr1:171017391-171017891	Fcgr3	0.754027	8.25628e-90	0.785855	0.959644	1
chr1:171019523-171020023	Fcgr3	0.523536	1.35846e-34	0.273171	0.959644	1
chr1:171129176-171129676	Fcgr3	0.564503	2.6513e-41	0.583791	0.959644	1
chr1:171231888-171232388	Fcgr3	0.60793	1.55332e-49	0.414514	0.959644	1
chr1:171234092-171234592	Fcgr3	0.770042	5.34743e-96	0.887645	0.959644	1
chr1:171272075-171272575	Fcgr3	0.689629	4.46917e-69	0.656566	0.959644	1
chr1:171274080-171274580	Fcgr3	0.787255	3.08265e-103	0.360422	0.959644	1
chr1:171129176-171129676	Cfap126	0.54275	1.26479e-37	0.583791	0.342685	1
chr1:170998272-170998772	Fcer1g	0.779846	4.8327e-100	0.827493	0.994615	1
chr1:171016792-171017292	Fcer1g	0.560185	1.4993e-40	0.347135	0.994615	1
chr1:171017391-171017891	Fcer1g	0.756959	6.60089e-91	0.785855	0.994615	1
chr1:171019523-171020023	Fcer1g	0.528429	2.39441e-35	0.273171	0.994615	1
chr1:171129176-171129676	Fcer1g	0.539306	4.56541e-37	0.583791	0.994615	1
chr1:171231888-171232388	Fcer1g	0.603228	1.3979e-48	0.414514	0.994615	1
chr1:171234092-171234592	Fcer1g	0.770155	4.81636e-96	0.887645	0.994615	1
chr1:171272075-171272575	Fcer1g	0.695843	7.78588e-71	0.656566	0.994615	1
chr1:171274080-171274580	Fcer1g	0.771529	1.34315e-96	0.360422	0.994615	1
chr1:171388723-171389223	Fcer1g	0.882656	6.34095e-161	0.957321	0.994615	1
chr1:171389321-171389821	Fcer1g	0.720657	2.47535e-78	0.657302	0.994615	1
chr1:171390074-171390574	Fcer1g	0.906024	3.41351e-183	0.874493	0.994615	1
chr1:171450643-171451143	Fcer1g	0.719689	5.02555e-78	0.409306	0.994615	1
chr1:171470903-171471403	Fcer1g	0.659249	4.36244e-61	0.620239	0.994615	1
chr1:171129176-171129676	Nectin4	0.645531	8.90276e-58	0.583791	0.251828	1
chr1:171274080-171274580	Nectin4	0.620436	3.75834e-52	0.360422	0.251828	1
chr1:171388723-171389223	Nectin4	0.626948	1.4682e-53	0.957321	0.251828	1
chr1:171390074-171390574	Nectin4	0.691222	1.6001e-69	0.874493	0.251828	1
chr1:171450643-171451143	Nectin4	0.855948	1.18627e-140	0.409306	0.251828	1
chr1:171470903-171471403	Nectin4	0.710369	3.96744e-75	0.620239	0.251828	1
chr1:171558881-171559381	Nectin4	0.807139	1.72108e-112	0.755804	0.251828	1
chr1:171616906-171617406	Nectin4	0.836452	2.69299e-128	0.641121	0.251828	1
chr1:171231888-171232388	Arhgap30	0.620016	4.62188e-52	0.414514	0.774301	1
chr1:171234092-171234592	Arhgap30	0.785723	1.44809e-102	0.887645	0.774301	1
chr1:171272075-171272575	Arhgap30	0.716543	4.92432e-77	0.656566	0.774301	1
chr1:171274080-171274580	Arhgap30	0.773882	1.47372e-97	0.360422	0.774301	1
chr1:171388723-171389223	Arhgap30	0.892035	3.08913e-169	0.957321	0.774301	1
chr1:171389321-171389821	Arhgap30	0.729448	3.44618e-81	0.657302	0.774301	1
chr1:171390074-171390574	Arhgap30	0.907732	4.81535e-185	0.874493	0.774301	1
chr1:171450643-171451143	Arhgap30	0.706505	5.84682e-74	0.409306	0.774301	1
chr1:171470903-171471403	Arhgap30	0.65012	7.2852e-59	0.620239	0.774301	1
chr1:171558881-171559381	Arhgap30	0.899611	1.55731e-176	0.755804	0.774301	1
chr1:171616906-171617406	Arhgap30	0.850861	2.93189e-137	0.641121	0.774301	1
chr1:171388723-171389223	Ly9	0.762806	3.84088e-93	0.957321	0.303917	1
chr1:171389321-171389821	Ly9	0.605578	4.6863e-49	0.657302	0.303917	1
chr1:171390074-171390574	Ly9	0.833276	1.94022e-126	0.874493	0.303917	1
chr1:171450643-171451143	Ly9	0.886927	1.28011e-164	0.409306	0.303917	1
chr1:171470903-171471403	Ly9	0.765868	2.43856e-94	0.620239	0.303917	1
chr1:171558881-171559381	Ly9	0.913558	1.21167e-191	0.755804	0.303917	1
chr1:171616906-171617406	Ly9	0.92551	9.68885e-207	0.641121	0.303917	1
chr1:171450643-171451143	Cd48	0.874209	5.13329e-154	0.409306	0.804738	1
chr1:171470903-171471403	Cd48	0.760821	2.23891e-92	0.620239	0.804738	1
chr1:171558881-171559381	Cd48	0.892335	1.62601e-169	0.755804	0.804738	1
chr1:171616906-171617406	Cd48	0.913832	5.77421e-192	0.641121	0.804738	1
chr1:171917428-171917928	Cd48	0.80635	4.182e-112	0.765094	0.804738	1
chr1:171558881-171559381	Slamf1	0.520961	3.34692e-34	0.755804	0.2588	1
chr1:171616906-171617406	Slamf1	0.628258	7.56628e-54	0.641121	0.2588	1
chr1:171616906-171617406	Cd84	0.900852	8.80564e-178	0.641121	0.85507	1
chr1:171849439-171849939	Cd84	0.551511	4.50103e-39	0.664066	0.85507	1
chr1:171917428-171917928	Cd84	0.882178	1.60432e-160	0.765094	0.85507	1
chr1:171917428-171917928	Slamf6	0.634723	2.73487e-55	0.765094	0.259933	1
chr1:173408954-173409454	Aim2	0.649937	8.06087e-59	0.388975	0.459219	1
chr1:173420299-173420799	Aim2	0.808338	4.41203e-113	0.299257	0.459219	1
chr1:173427363-173427863	Aim2	0.770269	4.33555e-96	0.338064	0.459219	1
chr1:173420299-173420799	Ifi213	0.67797	6.77845e-66	0.299257	0.310888	1
chr1:173427363-173427863	Ifi213	0.657548	1.14686e-60	0.338064	0.310888	1
chr1:173408954-173409454	Ifi209	0.849736	1.5898e-136	0.388975	0.345803	1
chr1:173420299-173420799	Ifi209	0.861953	7.82215e-145	0.299257	0.345803	1
chr1:173427363-173427863	Ifi209	0.802657	2.58741e-110	0.338064	0.345803	1
chr1:173809232-173809732	Ifi209	0.757393	4.52966e-91	0.482395	0.345803	1
chr1:173912757-173913257	Ifi207	0.686746	2.82027e-68	0.366792	0.702602	1
chr1:173809232-173809732	Ifi204	0.582831	1.26509e-44	0.482395	0.853653	1
chr1:173912757-173913257	Ifi204	0.680545	1.38452e-66	0.366792	0.853653	1
chr1:174040739-174041239	Ifi204	0.664886	1.69082e-62	0.506413	0.853653	1
chr1:173809232-173809732	Ifi211	0.62831	7.36912e-54	0.482395	0.647339	1
chr1:173912757-173913257	Ifi211	0.68162	7.1038e-67	0.366792	0.647339	1
chr1:174040739-174041239	Ifi211	0.688921	7.02969e-69	0.506413	0.647339	1
chr1:180365112-180365612	Itpkb	0.512701	5.71592e-33	0.988924	0.847758	1
chr1:180762426-180762926	Tmem63a	0.548947	1.20826e-38	0.716153	0.503599	1
chr1:180766486-180766986	Tmem63a	0.607544	1.8635e-49	0.740892	0.503599	1
chr1:180771299-180771799	Tmem63a	0.599265	8.65223e-48	0.715847	0.503599	1
chr1:180826593-180827093	Tmem63a	0.617428	1.64136e-51	0.722316	0.503599	1
chr1:180829729-180830229	Tmem63a	0.57465	4.08589e-43	0.824115	0.503599	1
chr1:180848464-180848964	Tmem63a	0.52649	4.78224e-35	0.935613	0.503599	1
chr1:180885668-180886168	Tmem63a	0.548951	1.20632e-38	0.251015	0.503599	1
chr1:181170031-181170531	Tmem63a	0.567104	9.22336e-42	0.64213	0.503599	1
chr1:181845758-181846258	Lbr	0.519246	6.06825e-34	0.285826	0.804285	1
chr1:181860599-181861099	Lbr	0.670528	6.09029e-64	0.936358	0.804285	1
chr1:181865561-181866061	Lbr	0.619883	4.93531e-52	0.711671	0.804285	1
chr1:181922010-181922510	Lbr	0.534753	2.44202e-36	0.865619	0.804285	1
chr1:182254622-182255122	1700047M11Rik	0.926827	1.4624e-208	0.883599	0.300743	1
chr1:182271541-182272041	1700047M11Rik	0.72304	4.28085e-79	0.316707	0.300743	1
chr1:182283244-182283744	1700047M11Rik	0.524594	9.3524e-35	0.560603	0.300743	1
chr1:182287710-182288210	1700047M11Rik	0.840691	7.75435e-131	0.663788	0.300743	1
chr1:184617655-184618155	Hlx	0.856358	6.25401e-141	0.717741	0.631979	1
chr1:184728695-184729195	Hlx	0.695129	1.24621e-70	0.698541	0.631979	1
chr1:184733112-184733612	Hlx	0.549718	8.98805e-39	0.752502	0.631979	1
chr1:184734806-184735306	Hlx	0.538239	6.7763e-37	0.631274	0.631979	1
chr1:191248377-191248877	Ppp2r5a	0.508407	2.42156e-32	0.303523	0.75435	1
chr1:191249900-191250400	Ppp2r5a	0.525215	7.50923e-35	0.359794	0.75435	1
chr1:191269461-191269961	Ppp2r5a	0.587981	1.34866e-45	0.869778	0.75435	1
chr1:191277544-191278044	Ppp2r5a	0.532829	4.90863e-36	0.965207	0.75435	1
chr1:191280648-191281148	Ppp2r5a	0.566514	1.17293e-41	0.837075	0.75435	1
chr1:191281153-191281653	Ppp2r5a	0.605832	4.16212e-49	0.971707	0.75435	1
chr1:191288718-191289218	Ppp2r5a	0.609061	9.11375e-50	0.72787	0.75435	1
chr1:193191457-193191957	Traf3ip3	0.63784	5.36524e-56	0.581978	0.494587	1
chr1:193200540-193201040	Traf3ip3	0.82107	1.22165e-119	0.424136	0.494587	1
chr1:193201282-193201782	Traf3ip3	0.945208	3.36987e-238	0.884442	0.494587	1
chr1:193242133-193242633	Traf3ip3	0.65823	7.78956e-61	0.861712	0.494587	1
chr1:193274363-193274863	Traf3ip3	0.718077	1.62387e-77	0.700084	0.494587	1
chr1:193274908-193275408	Traf3ip3	0.645101	1.12262e-57	0.587168	0.494587	1
chr1:193200540-193201040	Hsd11b1	0.767905	3.82914e-95	0.424136	0.711897	1
chr1:193201282-193201782	Hsd11b1	0.779206	8.99566e-100	0.884442	0.711897	1
chr1:193242133-193242633	Hsd11b1	0.794419	1.86088e-106	0.861712	0.711897	1
chr1:193274363-193274863	Hsd11b1	0.861732	1.12273e-144	0.700084	0.711897	1
chr1:193274908-193275408	Hsd11b1	0.833716	1.07906e-126	0.587168	0.711897	1
chr10:5548571-5549071	Syne1	0.612125	2.12274e-50	0.720629	0.660205	1
chr10:6982784-6983284	Ipcef1	0.803453	1.06994e-110	0.35102	0.27603	1
chr10:7052665-7053165	Ipcef1	0.790825	7.95639e-105	0.516174	0.27603	1
chr10:7062856-7063356	Ipcef1	0.835549	9.17137e-128	0.359942	0.27603	1
chr10:7063482-7063982	Ipcef1	0.797162	1.01404e-107	0.704283	0.27603	1
chr10:7063992-7064492	Ipcef1	0.879738	1.75891e-158	0.709809	0.27603	1
chr10:10448950-10449450	Rab32	0.793843	3.41776e-106	0.252253	0.786771	1
chr10:10456900-10457400	Rab32	0.80918	1.68383e-113	0.65653	0.786771	1
chr10:10557924-10558424	Rab32	0.590128	5.24033e-46	0.980127	0.786771	1
chr10:10732996-10733496	Rab32	0.805598	9.7657e-112	0.835285	0.786771	1
chr10:12929743-12930243	B230208H11Rik	0.736882	1.08178e-83	0.408072	0.638383	1
chr10:12974188-12974688	B230208H11Rik	0.722913	4.70214e-79	0.378801	0.638383	1
chr10:12975841-12976341	B230208H11Rik	0.870355	5.00495e-151	0.909474	0.638383	1
chr10:18999302-18999802	Tnfaip3	0.622694	1.23114e-52	0.326186	0.60993	1
chr10:19062012-19062512	Tnfaip3	0.706652	5.28364e-74	0.800959	0.60993	1
chr10:19094169-19094669	Tnfaip3	0.523103	1.58153e-34	0.484472	0.60993	1
chr10:19691818-19692318	Ifngr1	0.67451	5.58188e-65	0.889368	0.774358	1
chr10:20990600-20991100	Myb	0.682854	3.28698e-67	0.341721	0.416256	1
chr10:24911229-24911729	Enpp1	0.621603	2.11499e-52	0.274041	0.300686	1
chr10:40128332-40128832	Slc16a10	0.708552	1.41738e-74	0.731275	0.411665	1
chr10:40275801-40276301	Slc16a10	0.510345	1.26484e-32	0.751183	0.411665	1
chr10:40310192-40310692	Slc16a10	0.587711	1.51729e-45	0.668211	0.411665	1
chr10:51453966-51454466	Lilr4b	0.589813	6.0227e-46	0.352496	0.460863	1
chr10:51490721-51491221	Lilr4b	0.658892	5.34731e-61	0.390833	0.460863	1
chr10:51528773-51529273	Lilr4b	0.561524	8.78253e-41	0.262127	0.460863	1
chr10:51530742-51531242	Lilr4b	0.815519	1.01844e-116	0.520893	0.460863	1
chr10:51453966-51454466	Lilrb4a	0.776873	8.55699e-99	0.352496	0.294054	1
chr10:51481436-51481936	Lilrb4a	0.572105	1.18082e-42	0.482673	0.294054	1
chr10:51490721-51491221	Lilrb4a	0.80308	1.61716e-110	0.390833	0.294054	1
chr10:51528773-51529273	Lilrb4a	0.542306	1.49415e-37	0.262127	0.294054	1
chr10:51530742-51531242	Lilrb4a	0.90166	1.31567e-178	0.520893	0.294054	1
chr10:51571228-51571728	Lilrb4a	0.600902	4.08803e-48	0.435185	0.294054	1
chr10:57727620-57728120	Pkib	0.801406	1.0198e-109	0.255788	0.775322	1
chr10:57727620-57728120	Smpdl3a	0.577595	1.18208e-43	0.255788	0.755427	1
chr10:60252601-60253101	Psap	0.543317	1.02234e-37	0.730902	0.944624	1
chr10:60260574-60261074	Psap	0.562597	5.71361e-41	0.779032	0.944624	1
chr10:60367022-60367522	Psap	0.515718	2.04452e-33	0.550671	0.944624	1
chr10:60252601-60253101	Vsir	0.822037	3.70145e-120	0.730902	0.894066	1
chr10:60259595-60260095	Vsir	0.786239	8.6072e-103	0.328846	0.894066	1
chr10:60260574-60261074	Vsir	0.863715	4.23429e-146	0.779032	0.894066	1
chr10:60284403-60284903	Vsir	0.515651	2.09224e-33	0.620979	0.894066	1
chr10:60341516-60342016	Vsir	0.768118	3.15237e-95	0.488083	0.894066	1
chr10:60344068-60344568	Vsir	0.927701	8.74196e-210	0.892181	0.894066	1
chr10:60348888-60349388	Vsir	0.906641	7.34712e-184	0.865516	0.894066	1
chr10:60367022-60367522	Vsir	0.881036	1.46817e-159	0.550671	0.894066	1
chr10:60369325-60369825	Vsir	0.815848	6.89205e-117	0.736196	0.894066	1
chr10:60371573-60372073	Vsir	0.780657	2.18922e-100	0.365509	0.894066	1
chr10:60388320-60388820	Vsir	0.818391	3.23211e-118	0.601281	0.894066	1
chr10:60389426-60389926	Vsir	0.770265	4.35146e-96	0.888821	0.894066	1
chr10:60390925-60391425	Vsir	0.935822	5.88427e-222	0.932267	0.894066	1
chr10:60395685-60396185	Vsir	0.673497	1.0294e-64	0.532889	0.894066	1
chr10:60706121-60706621	Slc29a3	0.671666	3.09295e-64	0.26467	0.593777	1
chr10:60931805-60932305	Slc29a3	0.619865	4.979e-52	0.494085	0.593777	1
chr10:62491107-62491607	Srgn	0.787018	3.9196e-103	0.282704	0.960154	1
chr10:62491648-62492148	Srgn	0.805134	1.64456e-111	0.371983	0.960154	1
chr10:62496235-62496735	Srgn	0.845625	6.79617e-134	0.633239	0.960154	1
chr10:62497948-62498448	Srgn	0.559461	1.99808e-40	0.513133	0.960154	1
chr10:62501919-62502419	Srgn	0.777123	6.73358e-99	0.503062	0.960154	1
chr10:62503944-62504444	Srgn	0.843491	1.47603e-132	0.796007	0.960154	1
chr10:62505052-62505552	Srgn	0.768357	2.53023e-95	0.337423	0.960154	1
chr10:62505661-62506161	Srgn	0.854622	9.33222e-140	0.788968	0.960154	1
chr10:62507549-62508049	Srgn	0.772688	4.54033e-97	0.854786	0.960154	1
chr10:62508465-62508965	Srgn	0.596709	2.7688e-47	0.803579	0.960154	1
chr10:62509044-62509544	Srgn	0.849885	1.26967e-136	0.886349	0.960154	1
chr10:62541485-62541985	Srgn	0.931561	2.20109e-215	0.752664	0.960154	1
chr10:62542521-62543021	Srgn	0.516137	1.7711e-33	0.351648	0.960154	1
chr10:62543363-62543863	Srgn	0.951242	3.63904e-250	0.996393	0.960154	1
chr10:62546858-62547358	Srgn	0.566116	1.37853e-41	0.711895	0.960154	1
chr10:62553762-62554262	Srgn	0.689046	6.48975e-69	0.655736	0.960154	1
chr10:62948530-62949030	Dna2	0.709847	5.72032e-75	0.714053	0.429746	1
chr10:67068859-67069359	Nrbf2	0.522442	1.99372e-34	0.701286	0.702828	1
chr10:77519089-77519589	Itgb2	0.878443	2.02989e-157	0.754911	0.82826	1
chr10:77520504-77521004	Itgb2	0.836337	3.14879e-128	0.689551	0.82826	1
chr10:77522190-77522690	Itgb2	0.580558	3.35498e-44	0.695943	0.82826	1
chr10:77530044-77530544	Itgb2	0.907012	2.9192e-184	0.811824	0.82826	1
chr10:77530772-77531272	Itgb2	0.74581	8.1784e-87	0.278868	0.82826	1
chr10:77531582-77532082	Itgb2	0.844715	2.53373e-133	0.78193	0.82826	1
chr10:77536665-77537165	Itgb2	0.933573	1.94101e-218	0.915059	0.82826	1
chr10:77540619-77541119	Itgb2	0.654615	5.98993e-60	0.453434	0.82826	1
chr10:77544846-77545346	Itgb2	0.826314	1.7065e-122	0.678206	0.82826	1
chr10:77548629-77549129	Itgb2	0.783544	1.27324e-101	0.593054	0.82826	1
chr10:77549997-77550497	Itgb2	0.826215	1.93665e-122	0.594705	0.82826	1
chr10:77550897-77551397	Itgb2	0.950726	4.27652e-249	0.985466	0.82826	1
chr10:77558132-77558632	Itgb2	0.69954	6.66187e-72	0.350006	0.82826	1
chr10:78372873-78373373	Cstb	0.637923	5.13697e-56	0.514084	0.878819	1
chr10:79915136-79915636	Prss57	0.89096	3.03163e-168	0.443758	0.357932	1
chr10:79928294-79928794	Prss57	0.70918	9.12946e-75	0.805378	0.357932	1
chr10:80016382-80016882	Prss57	0.768032	3.40781e-95	0.849654	0.357932	1
chr10:80017323-80017823	Prss57	0.915364	8.84162e-194	0.735904	0.357932	1
chr10:80018608-80019108	Prss57	0.734961	4.88442e-83	0.754418	0.357932	1
chr10:80024106-80024606	Prss57	0.597401	2.02291e-47	0.610738	0.357932	1
chr10:79915136-79915636	Prtn3	0.821122	1.14588e-119	0.443758	0.66627	1
chr10:79928294-79928794	Prtn3	0.655794	3.09236e-60	0.805378	0.66627	1
chr10:80016382-80016882	Prtn3	0.717572	2.33995e-77	0.849654	0.66627	1
chr10:80017323-80017823	Prtn3	0.842953	3.18087e-132	0.735904	0.66627	1
chr10:80018608-80019108	Prtn3	0.693017	4.97245e-70	0.754418	0.66627	1
chr10:80024106-80024606	Prtn3	0.707967	2.12777e-74	0.610738	0.66627	1
chr10:80074532-80075032	Prtn3	0.62153	2.19222e-52	0.732477	0.66627	1
chr10:80075104-80075604	Prtn3	0.641164	9.2539e-57	0.991356	0.66627	1
chr10:80086832-80087332	Prtn3	0.726484	3.2734e-80	0.884604	0.66627	1
chr10:80087435-80087935	Prtn3	0.664201	2.5184e-62	0.436903	0.66627	1
chr10:80121582-80122082	Prtn3	0.691422	1.40556e-69	0.754548	0.66627	1
chr10:79877646-79878146	Elane	0.506308	4.86774e-32	0.717068	0.61061	1
chr10:79915136-79915636	Elane	0.886791	1.68339e-164	0.443758	0.61061	1
chr10:79928294-79928794	Elane	0.714948	1.54727e-76	0.805378	0.61061	1
chr10:80016382-80016882	Elane	0.772787	4.13724e-97	0.849654	0.61061	1
chr10:80017323-80017823	Elane	0.919219	1.68536e-198	0.735904	0.61061	1
chr10:80018608-80019108	Elane	0.7406	5.6261e-85	0.754418	0.61061	1
chr10:80024106-80024606	Elane	0.607891	1.58204e-49	0.610738	0.61061	1
chr10:80074532-80075032	Elane	0.673646	9.40663e-65	0.732477	0.61061	1
chr10:80075104-80075604	Elane	0.722378	6.97777e-79	0.991356	0.61061	1
chr10:80086832-80087332	Elane	0.767139	7.69713e-95	0.884604	0.61061	1
chr10:80087435-80087935	Elane	0.712182	1.10518e-75	0.436903	0.61061	1
chr10:80121582-80122082	Elane	0.797721	5.57274e-108	0.754548	0.61061	1
chr10:79915136-79915636	Arid3a	0.605981	3.88317e-49	0.443758	0.686391	1
chr10:79928294-79928794	Arid3a	0.633604	4.88412e-55	0.805378	0.686391	1
chr10:80016382-80016882	Arid3a	0.760767	2.34756e-92	0.849654	0.686391	1
chr10:80017323-80017823	Arid3a	0.745909	7.54401e-87	0.735904	0.686391	1
chr10:80018608-80019108	Arid3a	0.573211	7.45647e-43	0.754418	0.686391	1
chr10:80024106-80024606	Arid3a	0.790461	1.15631e-104	0.610738	0.686391	1
chr10:80051975-80052475	Arid3a	0.514972	2.63909e-33	0.81792	0.686391	1
chr10:80074532-80075032	Arid3a	0.516417	1.60866e-33	0.732477	0.686391	1
chr10:80075104-80075604	Arid3a	0.604457	7.90554e-49	0.991356	0.686391	1
chr10:80086832-80087332	Arid3a	0.77574	2.52553e-98	0.884604	0.686391	1
chr10:80087435-80087935	Arid3a	0.625963	2.4092e-53	0.436903	0.686391	1
chr10:80098595-80099095	Arid3a	0.53443	2.74505e-36	0.509333	0.686391	1
chr10:80121582-80122082	Arid3a	0.541688	1.88154e-37	0.754548	0.686391	1
chr10:80155934-80156434	Arid3a	0.518945	6.73477e-34	0.814018	0.686391	1
chr10:80016382-80016882	Abca7	0.537898	7.68522e-37	0.849654	0.336904	1
chr10:80024106-80024606	Abca7	0.696085	6.63445e-71	0.610738	0.336904	1
chr10:80086832-80087332	Abca7	0.529003	1.95053e-35	0.884604	0.336904	1
chr10:79877646-79878146	Arhgap45	0.593999	9.35174e-47	0.717068	0.82537	1
chr10:79915136-79915636	Arhgap45	0.643841	2.21145e-57	0.443758	0.82537	1
chr10:79928294-79928794	Arhgap45	0.61317	1.28672e-50	0.805378	0.82537	1
chr10:79940740-79941240	Arhgap45	0.608683	1.08952e-49	0.454775	0.82537	1
chr10:79945758-79946258	Arhgap45	0.568934	4.36373e-42	0.606148	0.82537	1
chr10:79946635-79947135	Arhgap45	0.531448	8.09948e-36	0.475688	0.82537	1
chr10:79994356-79994856	Arhgap45	0.511397	8.87979e-33	0.545247	0.82537	1
chr10:80016382-80016882	Arhgap45	0.860834	4.89139e-144	0.849654	0.82537	1
chr10:80017323-80017823	Arhgap45	0.805087	1.7334e-111	0.735904	0.82537	1
chr10:80018608-80019108	Arhgap45	0.626562	1.78353e-53	0.754418	0.82537	1
chr10:80024106-80024606	Arhgap45	0.72261	5.88208e-79	0.610738	0.82537	1
chr10:80051975-80052475	Arhgap45	0.505568	6.21718e-32	0.81792	0.82537	1
chr10:80074532-80075032	Arhgap45	0.585842	3.43451e-45	0.732477	0.82537	1
chr10:80075104-80075604	Arhgap45	0.723143	3.97101e-79	0.991356	0.82537	1
chr10:80086832-80087332	Arhgap45	0.79468	1.41358e-106	0.884604	0.82537	1
chr10:80087435-80087935	Arhgap45	0.68992	3.70784e-69	0.436903	0.82537	1
chr10:80098595-80099095	Arhgap45	0.524749	8.85841e-35	0.509333	0.82537	1
chr10:80121582-80122082	Arhgap45	0.566075	1.40154e-41	0.754548	0.82537	1
chr10:80155934-80156434	Arhgap45	0.601253	3.4822e-48	0.814018	0.82537	1
chr10:80215028-80215528	Arhgap45	0.597755	1.72189e-47	0.26367	0.82537	1
chr10:80024106-80024606	1600002K03Rik	0.545867	3.91166e-38	0.610738	0.402369	1
chr10:80051975-80052475	1600002K03Rik	0.540847	2.57621e-37	0.81792	0.402369	1
chr10:80086832-80087332	1600002K03Rik	0.539357	4.48066e-37	0.884604	0.402369	1
chr10:81134162-81134662	Matk	0.584889	5.19947e-45	0.961434	0.351641	1
chr10:81146934-81147434	Matk	0.504785	8.05539e-32	0.586576	0.351641	1
chr10:81221348-81221848	Matk	0.509996	1.42229e-32	0.512814	0.351641	1
chr10:81297814-81298314	Matk	0.693054	4.85429e-70	0.850147	0.351641	1
chr10:81298693-81299193	Matk	0.724252	1.73977e-79	0.896433	0.351641	1
chr10:81365525-81366025	Matk	0.519529	5.5047e-34	0.706943	0.351641	1
chr10:81291745-81292245	S1pr4	0.50818	2.61168e-32	0.484391	0.502182	1
chr10:81297260-81297760	S1pr4	0.666994	4.9332e-63	0.520548	0.502182	1
chr10:81297814-81298314	S1pr4	0.652083	2.45931e-59	0.850147	0.502182	1
chr10:81298693-81299193	S1pr4	0.731658	6.32968e-82	0.896433	0.502182	1
chr10:81356259-81356759	S1pr4	0.670727	5.41208e-64	0.868827	0.502182	1
chr10:81358851-81359351	S1pr4	0.573301	7.18142e-43	0.505089	0.502182	1
chr10:81405802-81406302	S1pr4	0.528878	2.03957e-35	0.582207	0.502182	1
chr10:81407445-81407945	S1pr4	0.619572	5.75016e-52	0.931446	0.502182	1
chr10:81494621-81495121	S1pr4	0.745299	1.24493e-86	0.752246	0.502182	1
chr10:81497692-81498192	S1pr4	0.744281	2.863e-86	0.631045	0.502182	1
chr10:81499420-81499920	S1pr4	0.778573	1.66498e-99	0.700138	0.502182	1
chr10:81517211-81517711	S1pr4	0.785043	2.85803e-102	0.56874	0.502182	1
chr10:81524001-81524501	S1pr4	0.801338	1.09791e-109	0.878427	0.502182	1
chr10:81291745-81292245	Gna15	0.540365	3.08261e-37	0.484391	0.556708	1
chr10:81297260-81297760	Gna15	0.595932	3.93033e-47	0.520548	0.556708	1
chr10:81297814-81298314	Gna15	0.879432	3.15145e-158	0.850147	0.556708	1
chr10:81298693-81299193	Gna15	0.923392	6.90944e-204	0.896433	0.556708	1
chr10:81356259-81356759	Gna15	0.728416	7.57095e-81	0.868827	0.556708	1
chr10:81365525-81366025	Gna15	0.522707	1.81651e-34	0.706943	0.556708	1
chr10:81405802-81406302	Gna15	0.502839	1.52793e-31	0.582207	0.556708	1
chr10:81407445-81407945	Gna15	0.552813	2.71714e-39	0.931446	0.556708	1
chr10:81497692-81498192	Gna15	0.590432	4.58169e-46	0.631045	0.556708	1
chr10:81517211-81517711	Gna15	0.718071	1.63125e-77	0.56874	0.556708	1
chr10:81519574-81520074	Gna15	0.690139	3.2189e-69	0.501684	0.556708	1
chr10:81524001-81524501	Gna15	0.820825	1.65321e-119	0.878427	0.556708	1
chr10:82974132-82974632	1700028I16Rik	0.553809	1.84465e-39	0.741251	0.268832	1
chr10:84508592-84509092	Tcp11l2	0.771423	1.48268e-96	0.793239	0.657825	1
chr10:84516328-84516828	Tcp11l2	0.745028	1.55694e-86	0.931275	0.657825	1
chr10:84517948-84518448	Tcp11l2	0.704089	3.0731e-73	0.595068	0.657825	1
chr10:84549106-84549606	Tcp11l2	0.624965	3.97023e-53	0.533503	0.657825	1
chr10:84549750-84550250	Tcp11l2	0.56447	2.68574e-41	0.306784	0.657825	1
chr10:84551766-84552266	Tcp11l2	0.729633	2.9934e-81	0.668812	0.657825	1
chr10:84573610-84574110	Tcp11l2	0.723982	2.12762e-79	0.390613	0.657825	1
chr10:84774529-84775029	Tcp11l2	0.508893	2.05785e-32	0.844163	0.657825	1
chr10:91242635-91243135	Apaf1	0.518541	7.74446e-34	0.616659	0.444029	1
chr10:93124212-93124712	Elk3	0.527239	3.66283e-35	0.908213	0.848835	1
chr10:93335607-93336107	Elk3	0.530587	1.10566e-35	0.654745	0.848835	1
chr10:93261232-93261732	Lta4h	0.53782	7.91127e-37	0.722348	0.75537	1
chr10:93488274-93488774	Lta4h	0.571417	1.57064e-42	0.462962	0.75537	1
chr10:99270232-99270732	Dusp6	0.503525	1.22015e-31	0.826655	0.960211	1
chr10:110918340-110918840	Osbpl8	0.627166	1.31491e-53	0.588694	0.47679	1
chr10:111103019-111103519	Osbpl8	0.639157	2.6825e-56	0.87046	0.47679	1
chr10:111156197-111156697	Osbpl8	0.522726	1.80499e-34	0.281936	0.47679	1
chr10:111996397-111996897	Glipr1	0.848662	7.91233e-136	0.378891	0.785637	1
chr10:111996962-111997462	Glipr1	0.739678	1.1758e-84	0.569543	0.785637	1
chr10:112000607-112001107	Glipr1	0.757322	4.81996e-91	0.262831	0.785637	1
chr10:112002510-112003010	Glipr1	0.92939	3.33196e-212	0.265962	0.785637	1
chr10:117215383-117215883	Lyz2	0.750373	1.83244e-88	0.467022	0.997846	1
chr10:117216040-117216540	Lyz2	0.819397	9.50792e-119	0.729045	0.997846	1
chr10:117282068-117282568	Lyz2	0.80863	3.16178e-113	0.709056	0.997846	1
chr10:117288176-117288676	Lyz2	0.824727	1.27586e-121	0.667054	0.997846	1
chr10:117215383-117215883	Lyz1	0.639135	2.71418e-56	0.467022	0.250751	1
chr10:117216040-117216540	Lyz1	0.700391	3.76807e-72	0.729045	0.250751	1
chr10:117282068-117282568	Lyz1	0.801658	7.74993e-110	0.709056	0.250751	1
chr10:117288176-117288676	Lyz1	0.761083	1.776e-92	0.667054	0.250751	1
chr10:117860871-117861371	Mdm2	0.676105	2.12183e-65	0.882388	0.729524	1
chr10:117755314-117755814	Rap1b	0.586806	2.25472e-45	0.598926	0.899053	1
chr10:117860871-117861371	Rap1b	0.706257	6.93553e-74	0.882388	0.899053	1
chr10:118082957-118083457	Rap1b	0.593592	1.12206e-46	0.366505	0.899053	1
chr10:118085266-118085766	Rap1b	0.639056	2.82869e-56	0.706153	0.899053	1
chr10:120323511-120324011	Irak3	0.52347	1.39053e-34	0.279886	0.385932	1
chr10:121373969-121374469	Gns	0.512174	6.82882e-33	0.270986	0.728731	1
chr10:121374579-121375079	Gns	0.626681	1.68059e-53	0.691623	0.728731	1
chr10:121488610-121489110	Gns	0.511059	9.95083e-33	0.748362	0.728731	1
chr10:121496691-121497191	Gns	0.620666	3.35713e-52	0.687111	0.728731	1
chr10:121591064-121591564	Gns	0.534227	2.95555e-36	0.485387	0.728731	1
chr10:121596496-121596996	Gns	0.599805	6.75808e-48	0.656476	0.728731	1
chr10:121705771-121706271	Rassf3	0.504859	7.85954e-32	0.396741	0.611064	1
chr10:122569695-122570195	Ppm1h	0.916558	3.22325e-195	0.527043	0.473899	1
chr10:122614723-122615223	Ppm1h	0.601482	3.13504e-48	0.406704	0.473899	1
chr10:122814987-122815487	Ppm1h	0.781245	1.23056e-100	0.776443	0.473899	1
chr10:127162799-127163299	B4galnt1	0.580571	3.33721e-44	0.372952	0.663946	1
chr10:127167203-127167703	B4galnt1	0.698132	1.70582e-71	0.635491	0.663946	1
chr10:127323372-127323872	B4galnt1	0.84045	1.08915e-130	0.77268	0.663946	1
chr10:127162799-127163299	Arhgap9	0.5906	4.25288e-46	0.372952	0.674148	1
chr10:127167203-127167703	Arhgap9	0.699674	6.09198e-72	0.635491	0.674148	1
chr10:127323372-127323872	Arhgap9	0.824215	2.43452e-121	0.77268	0.674148	1
chr10:127481367-127481867	Stat6	0.556746	5.84861e-40	0.806885	0.483591	1
chr10:127577791-127578291	Stat6	0.620949	2.9196e-52	0.725963	0.483591	1
chr10:127603679-127604179	Stat6	0.521721	2.56702e-34	0.746625	0.483591	1
chr10:127631273-127631773	Stat6	0.649399	1.08357e-58	0.395592	0.483591	1
chr10:127631799-127632299	Stat6	0.746548	4.4429e-87	0.854149	0.483591	1
chr10:128715496-128715996	Dgka	0.548592	1.38417e-38	0.714497	0.388143	1
chr11:3382559-3383059	Inpp5j	0.821576	6.5268e-120	0.436755	0.279771	1
chr11:3486311-3486811	Inpp5j	0.721168	1.70153e-78	0.664434	0.279771	1
chr11:3510261-3510761	Inpp5j	0.810999	2.07149e-114	0.555395	0.279771	1
chr11:3676257-3676757	Inpp5j	0.608368	1.26426e-49	0.286153	0.279771	1
chr11:3676257-3676757	Slc35e4	0.510845	1.0696e-32	0.286153	0.306354	1
chr11:3929980-3930480	Slc35e4	0.672751	1.61291e-64	0.694983	0.306354	1
chr11:3929980-3930480	Tcn2	0.537889	7.70978e-37	0.694983	0.848325	1
chr11:4217893-4218393	Sf3a1	0.520655	3.72244e-34	0.985937	0.760415	1
chr11:4195517-4196017	Osm	0.69134	1.48272e-69	0.629879	0.829791	1
chr11:4220377-4220877	Osm	0.646018	6.84071e-58	0.866642	0.829791	1
chr11:4229790-4230290	Osm	0.88501	6.02894e-163	0.868952	0.829791	1
chr11:4230851-4231351	Osm	0.801091	1.44024e-109	0.381533	0.829791	1
chr11:4231361-4231861	Osm	0.884774	9.62369e-163	0.406314	0.829791	1
chr11:4232619-4233119	Osm	0.925779	4.13625e-207	0.979809	0.829791	1
chr11:4236155-4236655	Osm	0.591867	2.42291e-46	0.818871	0.829791	1
chr11:4237430-4237930	Osm	0.955794	3.07007e-260	0.924327	0.829791	1
chr11:4240031-4240531	Osm	0.939035	3.29593e-227	0.892705	0.829791	1
chr11:4256977-4257477	Osm	0.879243	4.4854e-158	0.772518	0.829791	1
chr11:4260317-4260817	Osm	0.501305	2.52611e-31	0.702766	0.829791	1
chr11:6365885-6366385	Myo1g	0.501785	2.1593e-31	0.841602	0.570708	1
chr11:6391491-6391991	Myo1g	0.610513	4.57767e-50	0.632104	0.570708	1
chr11:6519594-6520094	Myo1g	0.847027	8.81186e-135	0.725223	0.570708	1
chr11:6520684-6521184	Myo1g	0.790091	1.69468e-104	0.471535	0.570708	1
chr11:6615444-6615944	Myo1g	0.614716	6.11158e-51	0.708168	0.570708	1
chr11:6623735-6624235	Myo1g	0.639887	1.82304e-56	0.559746	0.570708	1
chr11:11557609-11558109	Ikzf1	0.770169	4.75414e-96	0.418421	0.676642	1
chr11:11558627-11559127	Ikzf1	0.877021	2.91531e-156	0.29076	0.676642	1
chr11:11564097-11564597	Ikzf1	0.896982	6.16471e-174	0.703386	0.676642	1
chr11:11573629-11574129	Ikzf1	0.888841	2.55022e-166	0.798873	0.676642	1
chr11:11685891-11686391	Ikzf1	0.806428	3.83002e-112	0.881096	0.676642	1
chr11:11763316-11763816	Ikzf1	0.838541	1.54179e-129	0.620943	0.676642	1
chr11:16977589-16978089	Plek	0.734493	7.0377e-83	0.32881	0.811483	1
chr11:16984403-16984903	Plek	0.730662	1.36083e-81	0.336988	0.811483	1
chr11:16987642-16988142	Plek	0.608161	1.39351e-49	0.423441	0.811483	1
chr11:16999363-16999863	Plek	0.57352	6.55542e-43	0.487868	0.811483	1
chr11:17002680-17003180	Plek	0.706674	5.20479e-74	0.57651	0.811483	1
chr11:17004873-17005373	Plek	0.881018	1.51874e-159	0.335857	0.811483	1
chr11:17008412-17008912	Plek	0.845479	8.37056e-134	0.866866	0.811483	1
chr11:21425413-21425913	Vps54	0.523234	1.51029e-34	0.559369	0.460579	1
chr11:32542660-32543160	Stk10	0.528318	2.49121e-35	0.893993	0.568384	1
chr11:34008241-34008741	Lcp2	0.563437	4.07836e-41	0.67001	0.721816	1
chr11:34009705-34010205	Lcp2	0.874176	5.45154e-154	0.767804	0.721816	1
chr11:34031351-34031851	Lcp2	0.84412	5.97431e-133	0.734841	0.721816	1
chr11:34047365-34047865	Lcp2	0.588856	9.18068e-46	0.406686	0.721816	1
chr11:34063936-34064436	Lcp2	0.769096	1.2835e-95	0.638662	0.721816	1
chr11:34072256-34072756	Lcp2	0.734869	5.24835e-83	0.308807	0.721816	1
chr11:34782426-34782926	Dock2	0.717482	2.50014e-77	0.578286	0.590546	1
chr11:34782991-34783491	Dock2	0.894232	2.68971e-171	0.872976	0.590546	1
chr11:34783669-34784169	Dock2	0.92403	9.77854e-205	0.896801	0.590546	1
chr11:46310214-46310714	Cyfip2	0.647661	2.80268e-58	0.54134	0.583177	1
chr11:46311181-46311681	Cyfip2	0.522613	1.87754e-34	0.655503	0.583177	1
chr11:46314539-46315039	Cyfip2	0.789095	4.71481e-104	0.627434	0.583177	1
chr11:46461407-46461907	Cyfip2	0.650185	7.03151e-59	0.263248	0.583177	1
chr11:46461909-46462409	Cyfip2	0.721329	1.51084e-78	0.640843	0.583177	1
chr11:46480428-46480928	Cyfip2	0.631354	1.55748e-54	0.668476	0.583177	1
chr11:46314539-46315039	Itk	0.565126	2.05995e-41	0.627434	0.275293	1
chr11:46480428-46480928	Itk	0.577646	1.157e-43	0.668476	0.275293	1
chr11:46310214-46310714	Havcr2	0.626012	2.35023e-53	0.54134	0.40441	1
chr11:46311181-46311681	Havcr2	0.595315	5.18514e-47	0.655503	0.40441	1
chr11:46314539-46315039	Havcr2	0.741511	2.70463e-85	0.627434	0.40441	1
chr11:46449707-46450207	Havcr2	0.703846	3.62966e-73	0.397422	0.40441	1
chr11:46461407-46461907	Havcr2	0.788428	9.33311e-104	0.263248	0.40441	1
chr11:46461909-46462409	Havcr2	0.741276	3.26723e-85	0.640843	0.40441	1
chr11:46480428-46480928	Havcr2	0.831587	1.82772e-125	0.668476	0.40441	1
chr11:48787688-48788188	Irgm1	0.533874	3.35905e-36	0.844432	0.512158	1
chr11:50149524-50150024	Rnf130	0.531178	8.92915e-36	0.538182	0.873434	1
chr11:50239140-50239640	Rnf130	0.532397	5.74281e-36	0.860223	0.873434	1
chr11:50238273-50238773	Ltc4s	0.572639	9.46148e-43	0.780714	0.789038	1
chr11:50239140-50239640	Ltc4s	0.739965	9.35119e-85	0.860223	0.789038	1
chr11:53794754-53795254	Slc22a4	0.588784	9.47477e-46	0.933155	0.386386	1
chr11:53805729-53806229	Slc22a4	0.652833	1.62072e-59	0.701062	0.386386	1
chr11:54149802-54150302	Slc22a4	0.60484	6.61547e-49	0.559131	0.386386	1
chr11:54155833-54156333	Slc22a4	0.726658	2.8726e-80	0.781297	0.386386	1
chr11:54935960-54936460	Cdc42se2	0.503337	1.29775e-31	0.869195	0.863742	1
chr11:59541205-59541705	Nlrp3	0.884992	6.24346e-163	0.833706	0.322564	1
chr11:59542417-59542917	Nlrp3	0.84965	1.80611e-136	0.67027	0.322564	1
chr11:59543932-59544432	Nlrp3	0.838706	1.22868e-129	0.683984	0.322564	1
chr11:59554625-59555125	Nlrp3	0.819979	4.67746e-119	0.512819	0.322564	1
chr11:59565774-59566274	Nlrp3	0.66488	1.69715e-62	0.371534	0.322564	1
chr11:59571027-59571527	Nlrp3	0.676464	1.70451e-65	0.56119	0.322564	1
chr11:59565774-59566274	Flcn	0.634844	2.56912e-55	0.371534	0.443349	1
chr11:59571027-59571527	Flcn	0.618796	8.41696e-52	0.56119	0.443349	1
chr11:60930661-60931161	Tnfrsf13b	0.542711	1.28336e-37	0.699303	0.648302	1
chr11:60935228-60935728	Tnfrsf13b	0.717231	2.99503e-77	0.99023	0.648302	1
chr11:60935892-60936392	Tnfrsf13b	0.593689	1.07452e-46	0.689138	0.648302	1
chr11:61108760-61109260	Tnfrsf13b	0.587344	1.78172e-45	0.475841	0.648302	1
chr11:61116137-61116637	Tnfrsf13b	0.826729	1.00548e-122	0.421763	0.648302	1
chr11:61653034-61653534	Grap	0.53236	5.82107e-36	0.584419	0.507567	1
chr11:68417862-68418362	Pik3r5	0.525888	5.91897e-35	0.573729	0.276767	1
chr11:68431836-68432336	Pik3r5	0.543344	1.01217e-37	0.934837	0.276767	1
chr11:68440014-68440514	Pik3r5	0.71019	4.49775e-75	0.442506	0.276767	1
chr11:68440905-68441405	Pik3r5	0.777042	7.27117e-99	0.714551	0.276767	1
chr11:68502285-68502785	Pik3r5	0.739605	1.24617e-84	0.511033	0.276767	1
chr11:68502786-68503286	Pik3r5	0.75863	1.53981e-91	0.563415	0.276767	1
chr11:68502285-68502785	Pik3r6	0.515915	1.91146e-33	0.511033	0.339681	1
chr11:68502786-68503286	Pik3r6	0.58923	7.78547e-46	0.563415	0.339681	1
chr11:69554745-69555245	Cd68	0.745029	1.55556e-86	0.488778	0.952049	1
chr11:69671153-69671653	Cd68	0.505756	5.84459e-32	0.989162	0.952049	1
chr11:69671153-69671653	Acap1	0.560617	1.2619e-40	0.989162	0.43377	1
chr11:69881336-69881836	Acap1	0.667845	2.9867e-63	0.957437	0.43377	1
chr11:69930965-69931465	Acap1	0.889593	5.3455e-167	0.78345	0.43377	1
chr11:70084642-70085142	Clec10a	0.787692	1.97925e-103	0.487657	0.4616	1
chr11:70372350-70372850	Arrb2	0.504604	8.5488e-32	0.305582	0.867653	1
chr11:70433495-70433995	Arrb2	0.591454	2.91215e-46	0.694378	0.867653	1
chr11:70436955-70437455	Arrb2	0.5966	2.90918e-47	0.801044	0.867653	1
chr11:70446665-70447165	Arrb2	0.665892	9.4079e-63	0.775309	0.867653	1
chr11:70453119-70453619	Arrb2	0.587167	1.92482e-45	0.641412	0.867653	1
chr11:70650343-70650843	Arrb2	0.54299	1.15595e-37	0.727758	0.867653	1
chr11:70667377-70667877	Arrb2	0.577968	1.00977e-43	0.411253	0.867653	1
chr11:70679932-70680432	Arrb2	0.709134	9.42724e-75	0.818786	0.867653	1
chr11:70433495-70433995	Pfn1	0.539575	4.13202e-37	0.694378	0.964859	1
chr11:70436955-70437455	Pfn1	0.542554	1.36102e-37	0.801044	0.964859	1
chr11:70446665-70447165	Pfn1	0.564342	2.82807e-41	0.775309	0.964859	1
chr11:70453119-70453619	Pfn1	0.541808	1.7992e-37	0.641412	0.964859	1
chr11:70679932-70680432	Pfn1	0.616611	2.44281e-51	0.818786	0.964859	1
chr11:70683583-70684083	Pfn1	0.567476	7.92215e-42	0.564411	0.964859	1
chr11:70650343-70650843	Scimp	0.694671	1.68505e-70	0.727758	0.255342	1
chr11:70667377-70667877	Scimp	0.675822	2.5211e-65	0.411253	0.255342	1
chr11:70679932-70680432	Scimp	0.83643	2.77477e-128	0.818786	0.255342	1
chr11:70683583-70684083	Scimp	0.84479	2.27355e-133	0.564411	0.255342	1
chr11:70812335-70812835	Scimp	0.70522	1.41768e-73	0.614277	0.255342	1
chr11:72458194-72458694	Xaf1	0.523082	1.59327e-34	0.755588	0.59525	1
chr11:72538044-72538544	Xaf1	0.529832	1.44988e-35	0.414312	0.59525	1
chr11:72550068-72550568	Xaf1	0.690977	1.87434e-69	0.412921	0.59525	1
chr11:72458194-72458694	Spns2	0.720638	2.51072e-78	0.755588	0.392224	1
chr11:72946261-72946761	P2rx1	0.611396	3.00771e-50	0.766722	0.284079	1
chr11:72953748-72954248	P2rx1	0.74471	2.01796e-86	0.906361	0.284079	1
chr11:72960899-72961399	P2rx1	0.588692	9.86827e-46	0.865781	0.284079	1
chr11:73024410-73024910	P2rx1	0.836015	4.88725e-128	0.914503	0.284079	1
chr11:74524088-74524588	Rap1gap2	0.570933	1.91925e-42	0.453604	0.272346	1
chr11:74572532-74573032	Rap1gap2	0.739625	1.22626e-84	0.88887	0.272346	1
chr11:74575853-74576353	Rap1gap2	0.717263	2.92705e-77	0.805463	0.272346	1
chr11:74576874-74577374	Rap1gap2	0.666795	5.54659e-63	0.627681	0.272346	1
chr11:74647886-74648386	Rap1gap2	0.657978	8.98667e-61	0.624056	0.272346	1
chr11:75415081-75415581	Wdr81	0.50249	1.71366e-31	0.566735	0.356912	1
chr11:75415081-75415581	Slc43a2	0.728476	7.23208e-81	0.566735	0.669047	1
chr11:75458596-75459096	Slc43a2	0.877536	1.11421e-156	0.637658	0.669047	1
chr11:75532944-75533444	Slc43a2	0.717667	2.18497e-77	0.734742	0.669047	1
chr11:75541151-75541651	Slc43a2	0.718353	1.32887e-77	0.66504	0.669047	1
chr11:75570686-75571186	Slc43a2	0.744793	1.88708e-86	0.561042	0.669047	1
chr11:75571217-75571717	Slc43a2	0.827297	4.83648e-123	0.962062	0.669047	1
chr11:75592540-75593040	Slc43a2	0.52562	6.50972e-35	0.69798	0.669047	1
chr11:75644670-75645170	Slc43a2	0.824737	1.25967e-121	0.698666	0.669047	1
chr11:75653293-75653793	Slc43a2	0.667434	3.80685e-63	0.887838	0.669047	1
chr11:75659294-75659794	Slc43a2	0.597048	2.37421e-47	0.648307	0.669047	1
chr11:75458596-75459096	Pitpna	0.539113	4.9043e-37	0.637658	0.873094	1
chr11:75571217-75571717	Pitpna	0.512411	6.30372e-33	0.962062	0.873094	1
chr11:75644670-75645170	Pitpna	0.533114	4.42801e-36	0.698666	0.873094	1
chr11:75653293-75653793	Pitpna	0.521528	2.74701e-34	0.887838	0.873094	1
chr11:76025121-76025621	Rflnb	0.588946	8.82582e-46	0.497504	0.74035	1
chr11:76033680-76034180	Rflnb	0.663562	3.649e-62	0.640233	0.74035	1
chr11:76261137-76261637	Rflnb	0.746986	3.09442e-87	0.763919	0.74035	1
chr11:76456896-76457396	Abr	0.513401	4.50712e-33	0.57559	0.555178	1
chr11:76479041-76479541	Abr	0.683603	2.05468e-67	0.825084	0.555178	1
chr11:76479559-76480059	Abr	0.719318	6.58514e-78	0.844751	0.555178	1
chr11:76481861-76482361	Abr	0.592343	1.95995e-46	0.576146	0.555178	1
chr11:76482615-76483115	Abr	0.664617	1.97843e-62	0.879728	0.555178	1
chr11:76587218-76587718	Abr	0.599578	7.49548e-48	0.730409	0.555178	1
chr11:76587924-76588424	Abr	0.685655	5.63174e-68	0.91221	0.555178	1
chr11:76628664-76629164	Abr	0.515843	1.95879e-33	0.46433	0.555178	1
chr11:78982700-78983200	Lgals9	0.616905	2.11786e-51	0.762734	0.892139	1
chr11:79017243-79017743	Lgals9	0.50949	1.68562e-32	0.547894	0.892139	1
chr11:79023354-79023854	Lgals9	0.558046	3.4991e-40	0.720158	0.892139	1
chr11:79076405-79076905	Lgals9	0.619069	7.3619e-52	0.892643	0.892139	1
chr11:79088196-79088696	Lgals9	0.501492	2.37612e-31	0.53933	0.892139	1
chr11:79118753-79119253	Lgals9	0.510973	1.02399e-32	0.905257	0.892139	1
chr11:79528000-79528500	Evi2	0.666287	7.46643e-63	0.68838	0.295641	1
chr11:79530345-79530845	Evi2	0.626995	1.43371e-53	0.64916	0.295641	1
chr11:79652228-79652728	Evi2	0.565026	2.14466e-41	0.548289	0.295641	1
chr11:79653318-79653818	Evi2	0.557824	3.81987e-40	0.636971	0.295641	1
chr11:79658571-79659071	Evi2	0.642229	5.24708e-57	0.270793	0.295641	1
chr11:79673649-79674149	Evi2	0.521864	2.44192e-34	0.458445	0.295641	1
chr11:79287145-79287645	Evi2a	0.727681	1.32335e-80	0.405295	0.888568	1
chr11:79305567-79306067	Evi2a	0.691279	1.54251e-69	0.479026	0.888568	1
chr11:79526863-79527363	Evi2a	0.659432	3.93294e-61	0.493767	0.888568	1
chr11:79528000-79528500	Evi2a	0.706112	7.6658e-74	0.68838	0.888568	1
chr11:79530345-79530845	Evi2a	0.657584	1.12368e-60	0.64916	0.888568	1
chr11:79640827-79641327	Evi2a	0.661282	1.36135e-61	0.367214	0.888568	1
chr11:79653318-79653818	Evi2a	0.634658	2.82897e-55	0.636971	0.888568	1
chr11:79658571-79659071	Evi2a	0.613819	9.414e-51	0.270793	0.888568	1
chr11:79669125-79669625	Evi2a	0.732436	3.47826e-82	0.563429	0.888568	1
chr11:79673649-79674149	Evi2a	0.565764	1.59084e-41	0.458445	0.888568	1
chr11:79674182-79674682	Evi2a	0.679831	2.15525e-66	0.352814	0.888568	1
chr11:82006721-82007221	Ccl2	0.798325	2.91446e-108	0.793907	0.937369	1
chr11:82016313-82016813	Ccl2	0.782899	2.41196e-101	0.494233	0.937369	1
chr11:82006721-82007221	Ccl7	0.83679	1.69971e-128	0.793907	0.778439	1
chr11:82016313-82016813	Ccl7	0.809895	7.41406e-114	0.494233	0.778439	1
chr11:82006721-82007221	Ccl12	0.845726	5.86438e-134	0.793907	0.719549	1
chr11:82016313-82016813	Ccl12	0.820911	1.48817e-119	0.494233	0.719549	1
chr11:82870473-82870973	Slfn5	0.503938	1.06508e-31	0.878629	0.626878	1
chr11:82952050-82952550	Slfn5	0.527919	2.87297e-35	0.676268	0.626878	1
chr11:83020488-83020988	Slfn5	0.503457	1.24762e-31	0.511711	0.626878	1
chr11:83116759-83117259	Slfn5	0.635311	2.01409e-55	0.527936	0.626878	1
chr11:83124887-83125387	Slfn5	0.65989	3.0266e-61	0.481767	0.626878	1
chr11:82952050-82952550	Slfn8	0.501721	2.20498e-31	0.676268	0.430936	1
chr11:83116759-83117259	Slfn8	0.656872	1.6813e-60	0.527936	0.430936	1
chr11:83124887-83125387	Slfn8	0.67958	2.51559e-66	0.481767	0.430936	1
chr11:82952050-82952550	Slfn2	0.533035	4.55574e-36	0.676268	0.922916	1
chr11:83116759-83117259	Slfn2	0.754568	5.19364e-90	0.527936	0.922916	1
chr11:83124887-83125387	Slfn2	0.795447	6.28197e-107	0.481767	0.922916	1
chr11:83116759-83117259	Slfn1	0.803925	6.34495e-111	0.527936	0.561186	1
chr11:83124887-83125387	Slfn1	0.878544	1.67729e-157	0.481767	0.561186	1
chr11:83116759-83117259	Slfn4	0.846773	1.2807e-134	0.527936	0.482628	1
chr11:83124887-83125387	Slfn4	0.938219	7.59267e-226	0.481767	0.482628	1
chr11:83426999-83427499	1700020L24Rik	0.736418	1.55733e-83	0.6495	0.640651	1
chr11:83572136-83572636	1700020L24Rik	0.828917	5.99116e-124	0.635433	0.640651	1
chr11:83638943-83639443	1700020L24Rik	0.8165	3.15209e-117	0.523132	0.640651	1
chr11:83639458-83639958	1700020L24Rik	0.872874	5.70342e-153	0.642538	0.640651	1
chr11:83640032-83640532	1700020L24Rik	0.901069	5.29079e-178	0.908061	0.640651	1
chr11:83646614-83647114	1700020L24Rik	0.850995	2.39665e-137	0.308179	0.640651	1
chr11:83648915-83649415	1700020L24Rik	0.838801	1.07995e-129	0.713613	0.640651	1
chr11:83649575-83650075	1700020L24Rik	0.91396	4.09605e-192	0.622998	0.640651	1
chr11:83662306-83662806	1700020L24Rik	0.755231	2.94391e-90	0.428976	0.640651	1
chr11:83426999-83427499	Ccl9	0.732423	3.51282e-82	0.6495	0.503316	1
chr11:83572136-83572636	Ccl9	0.615684	3.83084e-51	0.635433	0.503316	1
chr11:83638943-83639443	Ccl9	0.86666	2.96513e-148	0.523132	0.503316	1
chr11:83639458-83639958	Ccl9	0.854105	2.08397e-139	0.642538	0.503316	1
chr11:83640032-83640532	Ccl9	0.873351	2.41277e-153	0.908061	0.503316	1
chr11:83646614-83647114	Ccl9	0.767193	7.33631e-95	0.308179	0.503316	1
chr11:83648915-83649415	Ccl9	0.896663	1.25805e-173	0.713613	0.503316	1
chr11:83649575-83650075	Ccl9	0.830082	1.3178e-124	0.622998	0.503316	1
chr11:83662306-83662806	Ccl9	0.880574	3.5774e-159	0.428976	0.503316	1
chr11:83743409-83743909	Ccl9	0.624652	4.6426e-53	0.266316	0.503316	1
chr11:83746198-83746698	Ccl9	0.539197	4.75449e-37	0.482287	0.503316	1
chr11:83746955-83747455	Ccl9	0.732045	4.7009e-82	0.325311	0.503316	1
chr11:83789186-83789686	Ccl9	0.780595	2.32598e-100	0.725398	0.503316	1
chr11:83426999-83427499	Ccl6	0.759328	8.34794e-92	0.6495	0.323698	1
chr11:83572136-83572636	Ccl6	0.659258	4.34195e-61	0.635433	0.323698	1
chr11:83638943-83639443	Ccl6	0.87923	4.59689e-158	0.523132	0.323698	1
chr11:83639458-83639958	Ccl6	0.882533	8.0618e-161	0.642538	0.323698	1
chr11:83640032-83640532	Ccl6	0.899398	2.54218e-176	0.908061	0.323698	1
chr11:83646614-83647114	Ccl6	0.807767	8.44947e-113	0.308179	0.323698	1
chr11:83648915-83649415	Ccl6	0.911107	8.13365e-189	0.713613	0.323698	1
chr11:83649575-83650075	Ccl6	0.870362	4.94935e-151	0.622998	0.323698	1
chr11:83662306-83662806	Ccl6	0.886073	7.19428e-164	0.428976	0.323698	1
chr11:83743409-83743909	Ccl6	0.670936	4.77976e-64	0.266316	0.323698	1
chr11:83746198-83746698	Ccl6	0.604087	9.38464e-49	0.482287	0.323698	1
chr11:83746955-83747455	Ccl6	0.773036	3.27484e-97	0.325311	0.323698	1
chr11:83789186-83789686	Ccl6	0.808012	6.3837e-113	0.725398	0.323698	1
chr11:83426999-83427499	Ccl3	0.743148	7.20032e-86	0.6495	0.917588	1
chr11:83572136-83572636	Ccl3	0.661962	9.20689e-62	0.635433	0.917588	1
chr11:83638943-83639443	Ccl3	0.858438	2.32311e-142	0.523132	0.917588	1
chr11:83639458-83639958	Ccl3	0.862035	6.85925e-145	0.642538	0.917588	1
chr11:83640032-83640532	Ccl3	0.888294	7.88256e-166	0.908061	0.917588	1
chr11:83646614-83647114	Ccl3	0.785188	2.47204e-102	0.308179	0.917588	1
chr11:83648915-83649415	Ccl3	0.896267	3.03866e-173	0.713613	0.917588	1
chr11:83649575-83650075	Ccl3	0.844168	5.57892e-133	0.622998	0.917588	1
chr11:83662306-83662806	Ccl3	0.861576	1.4514e-144	0.428976	0.917588	1
chr11:83743409-83743909	Ccl3	0.67105	4.46817e-64	0.266316	0.917588	1
chr11:83746198-83746698	Ccl3	0.600658	4.57209e-48	0.482287	0.917588	1
chr11:83746955-83747455	Ccl3	0.76145	1.2837e-92	0.325311	0.917588	1
chr11:83789186-83789686	Ccl3	0.797744	5.4403e-108	0.725398	0.917588	1
chr11:83426999-83427499	Ccl4	0.676209	1.99161e-65	0.6495	0.828374	1
chr11:83572136-83572636	Ccl4	0.55242	3.16572e-39	0.635433	0.828374	1
chr11:83638943-83639443	Ccl4	0.794503	1.70304e-106	0.523132	0.828374	1
chr11:83639458-83639958	Ccl4	0.783356	1.53412e-101	0.642538	0.828374	1
chr11:83640032-83640532	Ccl4	0.811215	1.61286e-114	0.908061	0.828374	1
chr11:83646614-83647114	Ccl4	0.693861	2.86543e-70	0.308179	0.828374	1
chr11:83648915-83649415	Ccl4	0.833324	1.82007e-126	0.713613	0.828374	1
chr11:83649575-83650075	Ccl4	0.751026	1.058e-88	0.622998	0.828374	1
chr11:83662306-83662806	Ccl4	0.824255	2.31351e-121	0.428976	0.828374	1
chr11:83743409-83743909	Ccl4	0.554953	1.18086e-39	0.266316	0.828374	1
chr11:83746955-83747455	Ccl4	0.679823	2.16503e-66	0.325311	0.828374	1
chr11:83789186-83789686	Ccl4	0.742387	1.33378e-85	0.725398	0.828374	1
chr11:83638943-83639443	Wfdc17	0.776273	1.52107e-98	0.523132	0.690132	1
chr11:83639458-83639958	Wfdc17	0.743455	5.60629e-86	0.642538	0.690132	1
chr11:83640032-83640532	Wfdc17	0.765836	2.51081e-94	0.908061	0.690132	1
chr11:83646614-83647114	Wfdc17	0.648801	1.50308e-58	0.308179	0.690132	1
chr11:83648915-83649415	Wfdc17	0.795636	5.14773e-107	0.713613	0.690132	1
chr11:83649575-83650075	Wfdc17	0.704984	1.66774e-73	0.622998	0.690132	1
chr11:83662306-83662806	Wfdc17	0.79979	5.95734e-109	0.428976	0.690132	1
chr11:83746955-83747455	Wfdc17	0.622043	1.70022e-52	0.325311	0.690132	1
chr11:83789186-83789686	Wfdc17	0.708453	1.51863e-74	0.725398	0.690132	1
chr11:83572136-83572636	Wfdc21	0.773738	1.68963e-97	0.635433	0.964178	1
chr11:83638943-83639443	Wfdc21	0.7679	3.84844e-95	0.523132	0.964178	1
chr11:83639458-83639958	Wfdc21	0.843709	1.07987e-132	0.642538	0.964178	1
chr11:83640032-83640532	Wfdc21	0.845682	6.25085e-134	0.908061	0.964178	1
chr11:83646614-83647114	Wfdc21	0.805522	1.06307e-111	0.308179	0.964178	1
chr11:83648915-83649415	Wfdc21	0.80743	1.23845e-112	0.713613	0.964178	1
chr11:83649575-83650075	Wfdc21	0.851661	8.73719e-138	0.622998	0.964178	1
chr11:83662306-83662806	Wfdc21	0.739948	9.47737e-85	0.428976	0.964178	1
chr11:83743409-83743909	Wfdc21	0.77951	6.70117e-100	0.266316	0.964178	1
chr11:83746198-83746698	Wfdc21	0.822118	3.34794e-120	0.482287	0.964178	1
chr11:83746955-83747455	Wfdc21	0.762965	3.33606e-93	0.325311	0.964178	1
chr11:83789186-83789686	Wfdc21	0.735408	3.44553e-83	0.725398	0.964178	1
chr11:86907847-86908347	Cltc	0.659916	2.98318e-61	0.343914	0.784107	1
chr11:94589358-94589858	Abcc3	0.761588	1.13691e-92	0.714233	0.30267	1
chr11:95688358-95688858	Abi3	0.503601	1.18983e-31	0.724353	0.498838	1
chr11:95713802-95714302	Abi3	0.515038	2.58009e-33	0.643983	0.498838	1
chr11:95749500-95750000	Abi3	0.502921	1.48792e-31	0.361647	0.498838	1
chr11:95688358-95688858	Gngt2	0.541804	1.80139e-37	0.724353	0.777532	1
chr11:95749500-95750000	Gngt2	0.665483	1.19318e-62	0.361647	0.777532	1
chr11:95805039-95805539	Gngt2	0.557937	3.65214e-40	0.814735	0.777532	1
chr11:95805577-95806077	Gngt2	0.54079	2.63107e-37	0.932415	0.777532	1
chr11:95834406-95834906	Gngt2	0.524652	9.16671e-35	0.666125	0.777532	1
chr11:97825183-97825683	Arl5c	0.790582	1.02251e-104	0.718324	0.46279	1
chr11:97826378-97826878	Arl5c	0.590376	4.6962e-46	0.768162	0.46279	1
chr11:97829366-97829866	Arl5c	0.79777	5.29065e-108	0.607274	0.46279	1
chr11:97829922-97830422	Arl5c	0.807577	1.04901e-112	0.936699	0.46279	1
chr11:97999218-97999718	Arl5c	0.576087	2.23406e-43	0.399513	0.46279	1
chr11:100626212-100626712	Dhx58	0.778341	2.08274e-99	0.470103	0.329989	1
chr11:100814395-100814895	Dhx58	0.736494	1.46698e-83	0.583234	0.329989	1
chr11:100814395-100814895	Rab5c	0.533788	3.46549e-36	0.583234	0.829167	1
chr11:100814395-100814895	Atp6v0a1	0.589312	7.5091e-46	0.583234	0.697217	1
chr11:102429029-102429529	Grn	0.644503	1.55045e-57	0.797976	0.952729	1
chr11:102431989-102432489	Grn	0.77172	1.1242e-96	0.903247	0.952729	1
chr11:102432805-102433305	Grn	0.562958	4.94346e-41	0.320184	0.952729	1
chr11:103173624-103174124	Nmt1	0.50923	1.83898e-32	0.736276	0.750949	1
chr11:103174252-103174752	Nmt1	0.535784	1.67355e-36	0.782988	0.750949	1
chr11:103174855-103175355	Nmt1	0.509079	1.93377e-32	0.976359	0.750949	1
chr11:103178072-103178572	Nmt1	0.545646	4.25199e-38	0.994227	0.750949	1
chr11:103146379-103146879	Fmnl1	0.56486	2.29398e-41	0.452182	0.623023	1
chr11:103170304-103170804	Fmnl1	0.558857	2.53767e-40	0.772393	0.623023	1
chr11:103170820-103171320	Fmnl1	0.758148	2.34551e-91	0.863601	0.623023	1
chr11:103172094-103172594	Fmnl1	0.618579	9.35723e-52	0.693427	0.623023	1
chr11:103173624-103174124	Fmnl1	0.812172	5.28639e-115	0.736276	0.623023	1
chr11:103174252-103174752	Fmnl1	0.847898	2.4426e-135	0.782988	0.623023	1
chr11:103174855-103175355	Fmnl1	0.946556	9.4969e-241	0.976359	0.623023	1
chr11:103175475-103175975	Fmnl1	0.764759	6.65175e-94	0.329532	0.623023	1
chr11:103178072-103178572	Fmnl1	0.958101	7.81694e-266	0.994227	0.623023	1
chr11:103197009-103197509	Fmnl1	0.703235	5.5107e-73	0.36184	0.623023	1
chr11:103248823-103249323	Fmnl1	0.58746	1.69356e-45	0.633714	0.623023	1
chr11:103249433-103249933	Fmnl1	0.858397	2.48005e-142	0.79017	0.623023	1
chr11:103249936-103250436	Fmnl1	0.708421	1.55299e-74	0.396767	0.623023	1
chr11:103258111-103258611	Fmnl1	0.876454	8.33114e-156	0.659675	0.623023	1
chr11:103262349-103262849	Fmnl1	0.610408	4.81056e-50	0.800986	0.623023	1
chr11:103344198-103344698	Fmnl1	0.702487	9.15129e-73	0.41651	0.623023	1
chr11:103344898-103345398	Fmnl1	0.766219	1.77237e-94	0.573877	0.623023	1
chr11:103403754-103404254	Fmnl1	0.807715	8.95633e-113	0.37903	0.623023	1
chr11:103413114-103413614	Fmnl1	0.648129	2.17162e-58	0.784043	0.623023	1
chr11:103363241-103363741	Arhgap27	0.520633	3.75157e-34	0.858236	0.300459	1
chr11:106122596-106123096	Limd2	0.510801	1.08556e-32	0.313805	0.958227	1
chr11:106158997-106159497	Limd2	0.593022	1.44763e-46	0.893024	0.958227	1
chr11:106165286-106165786	Limd2	0.515707	2.05248e-33	0.456601	0.958227	1
chr11:106387586-106388086	Limd2	0.545776	4.04781e-38	0.478488	0.958227	1
chr11:106158997-106159497	Cd79b	0.724617	1.32696e-79	0.893024	0.40713	1
chr11:106387586-106388086	Cd79b	0.61935	6.41453e-52	0.478488	0.40713	1
chr11:106419472-106419972	Cd79b	0.768742	1.77545e-95	0.661303	0.40713	1
chr11:106564221-106564721	Cd79b	0.759142	9.83044e-92	0.266429	0.40713	1
chr11:106564221-106564721	Milr1	0.538141	7.02842e-37	0.266429	0.824236	1
chr11:106819703-106820203	Milr1	0.604414	8.06698e-49	0.399854	0.824236	1
chr11:107417166-107417666	Pitpnc1	0.569128	4.03108e-42	0.705292	0.60721	1
chr11:114653649-114654149	Cd300a	0.755527	2.28318e-90	0.322633	0.801111	1
chr11:114702506-114703006	Cd300a	0.633028	6.57544e-55	0.337006	0.801111	1
chr11:114879611-114880111	Cd300a	0.740559	5.81286e-85	0.437863	0.801111	1
chr11:114883210-114883710	Cd300a	0.602285	2.16348e-48	0.644463	0.801111	1
chr11:114890083-114890583	Cd300a	0.786564	6.20007e-103	0.874304	0.801111	1
chr11:114897957-114898457	Cd300a	0.824478	1.74493e-121	0.711366	0.801111	1
chr11:114907518-114908018	Cd300a	0.790553	1.05342e-104	0.857908	0.801111	1
chr11:114908110-114908610	Cd300a	0.776608	1.10344e-98	0.33771	0.801111	1
chr11:114912744-114913244	Cd300a	0.577094	1.4607e-43	0.89031	0.801111	1
chr11:114917014-114917514	Cd300a	0.689094	6.29714e-69	0.839327	0.801111	1
chr11:114927019-114927519	Cd300a	0.600246	5.5222e-48	0.527061	0.801111	1
chr11:114930984-114931484	Cd300a	0.641443	7.97602e-57	0.479362	0.801111	1
chr11:114934190-114934690	Cd300a	0.588162	1.24506e-45	0.460055	0.801111	1
chr11:114965359-114965859	Cd300a	0.699219	8.26216e-72	0.584997	0.801111	1
chr11:114968748-114969248	Cd300a	0.883169	2.31932e-161	0.526819	0.801111	1
chr11:114989687-114990187	Cd300a	0.62121	2.56805e-52	0.32375	0.801111	1
chr11:115001436-115001936	Cd300a	0.870921	1.84234e-151	0.558032	0.801111	1
chr11:115004064-115004564	Cd300a	0.830414	8.54882e-125	0.753879	0.801111	1
chr11:115119344-115119844	Cd300a	0.672646	1.71813e-64	0.551936	0.801111	1
chr11:115133722-115134222	Cd300a	0.728398	7.67174e-81	0.887358	0.801111	1
chr11:115138888-115139388	Cd300a	0.867841	3.91605e-149	0.790682	0.801111	1
chr11:114879611-114880111	Cd300ld	0.733381	1.67597e-82	0.437863	0.27722	1
chr11:114883210-114883710	Cd300ld	0.573818	5.7889e-43	0.644463	0.27722	1
chr11:114890083-114890583	Cd300ld	0.768993	1.40982e-95	0.874304	0.27722	1
chr11:114897957-114898457	Cd300ld	0.819196	1.21357e-118	0.711366	0.27722	1
chr11:114907518-114908018	Cd300ld	0.769032	1.36165e-95	0.857908	0.27722	1
chr11:114908110-114908610	Cd300ld	0.773033	3.28302e-97	0.33771	0.27722	1
chr11:114912744-114913244	Cd300ld	0.565372	1.8653e-41	0.89031	0.27722	1
chr11:114917014-114917514	Cd300ld	0.668993	1.51539e-63	0.839327	0.27722	1
chr11:114927019-114927519	Cd300ld	0.578665	7.51289e-44	0.527061	0.27722	1
chr11:114930984-114931484	Cd300ld	0.624886	4.13062e-53	0.479362	0.27722	1
chr11:114934190-114934690	Cd300ld	0.570756	2.06364e-42	0.460055	0.27722	1
chr11:114965359-114965859	Cd300ld	0.689139	6.11845e-69	0.584997	0.27722	1
chr11:114968748-114969248	Cd300ld	0.883612	9.6857e-162	0.526819	0.27722	1
chr11:114989687-114990187	Cd300ld	0.604277	8.59772e-49	0.32375	0.27722	1
chr11:115001436-115001936	Cd300ld	0.864782	7.17705e-147	0.558032	0.27722	1
chr11:115004064-115004564	Cd300ld	0.819457	8.84148e-119	0.753879	0.27722	1
chr11:115119344-115119844	Cd300ld	0.659902	3.00525e-61	0.551936	0.27722	1
chr11:115133722-115134222	Cd300ld	0.709756	6.09827e-75	0.887358	0.27722	1
chr11:115138888-115139388	Cd300ld	0.859932	2.10533e-143	0.790682	0.27722	1
chr11:115141855-115142355	Cd300ld	0.605306	5.32134e-49	0.251787	0.27722	1
chr11:115153822-115154322	Cd300ld	0.679466	2.69824e-66	0.963686	0.27722	1
chr11:115172739-115173239	Cd300ld	0.687566	1.67254e-68	0.7766	0.27722	1
chr11:115173499-115173999	Cd300ld	0.6448	1.32051e-57	0.832504	0.27722	1
chr11:115188660-115189160	Cd300ld	0.789667	2.62321e-104	0.821716	0.27722	1
chr11:115189203-115189703	Cd300ld	0.835578	8.82881e-128	0.75322	0.27722	1
chr11:115190350-115190850	Cd300ld	0.650183	7.03726e-59	0.671347	0.27722	1
chr11:115191958-115192458	Cd300ld	0.612805	1.53245e-50	0.453142	0.27722	1
chr11:114879611-114880111	Cd300c2	0.727728	1.27703e-80	0.437863	0.912827	1
chr11:114883210-114883710	Cd300c2	0.597606	1.84256e-47	0.644463	0.912827	1
chr11:114890083-114890583	Cd300c2	0.785179	2.49161e-102	0.874304	0.912827	1
chr11:114897957-114898457	Cd300c2	0.817354	1.1276e-117	0.711366	0.912827	1
chr11:114907518-114908018	Cd300c2	0.785241	2.34514e-102	0.857908	0.912827	1
chr11:114908110-114908610	Cd300c2	0.766962	9.03286e-95	0.33771	0.912827	1
chr11:114912744-114913244	Cd300c2	0.581649	2.10287e-44	0.89031	0.912827	1
chr11:114917014-114917514	Cd300c2	0.691441	1.388e-69	0.839327	0.912827	1
chr11:114927019-114927519	Cd300c2	0.595152	5.58006e-47	0.527061	0.912827	1
chr11:114930984-114931484	Cd300c2	0.64117	9.22053e-57	0.479362	0.912827	1
chr11:114934190-114934690	Cd300c2	0.594065	9.08297e-47	0.460055	0.912827	1
chr11:114965359-114965859	Cd300c2	0.697247	3.07038e-71	0.584997	0.912827	1
chr11:114968748-114969248	Cd300c2	0.875282	7.22613e-155	0.526819	0.912827	1
chr11:114989687-114990187	Cd300c2	0.615599	3.99036e-51	0.32375	0.912827	1
chr11:115001436-115001936	Cd300c2	0.868427	1.43327e-149	0.558032	0.912827	1
chr11:115004064-115004564	Cd300c2	0.823692	4.68946e-121	0.753879	0.912827	1
chr11:115119344-115119844	Cd300c2	0.675185	3.70835e-65	0.551936	0.912827	1
chr11:115133722-115134222	Cd300c2	0.72927	3.9468e-81	0.887358	0.912827	1
chr11:115138888-115139388	Cd300c2	0.856233	7.59376e-141	0.790682	0.912827	1
chr11:115141855-115142355	Cd300c2	0.609583	7.11969e-50	0.251787	0.912827	1
chr11:115153822-115154322	Cd300c2	0.696215	6.08857e-71	0.963686	0.912827	1
chr11:115172739-115173239	Cd300c2	0.684519	1.15501e-67	0.7766	0.912827	1
chr11:115173499-115173999	Cd300c2	0.666811	5.49489e-63	0.832504	0.912827	1
chr11:115188660-115189160	Cd300c2	0.80547	1.12794e-111	0.821716	0.912827	1
chr11:115189203-115189703	Cd300c2	0.835846	6.13905e-128	0.75322	0.912827	1
chr11:115190350-115190850	Cd300c2	0.663851	3.08619e-62	0.671347	0.912827	1
chr11:115191958-115192458	Cd300c2	0.622946	1.08624e-52	0.453142	0.912827	1
chr11:114879611-114880111	Rab37	0.70518	1.45761e-73	0.437863	0.292751	1
chr11:114883210-114883710	Rab37	0.767598	5.06767e-95	0.644463	0.292751	1
chr11:114890083-114890583	Rab37	0.771539	1.33135e-96	0.874304	0.292751	1
chr11:114897957-114898457	Rab37	0.685506	6.1909e-68	0.711366	0.292751	1
chr11:114907518-114908018	Rab37	0.836807	1.66253e-128	0.857908	0.292751	1
chr11:114908110-114908610	Rab37	0.625977	2.39217e-53	0.33771	0.292751	1
chr11:114912744-114913244	Rab37	0.608695	1.0837e-49	0.89031	0.292751	1
chr11:114917014-114917514	Rab37	0.817046	1.63486e-117	0.839327	0.292751	1
chr11:114927019-114927519	Rab37	0.726791	2.59868e-80	0.527061	0.292751	1
chr11:114930984-114931484	Rab37	0.747541	1.95076e-87	0.479362	0.292751	1
chr11:114934190-114934690	Rab37	0.696906	3.85168e-71	0.460055	0.292751	1
chr11:114965359-114965859	Rab37	0.622428	1.40484e-52	0.584997	0.292751	1
chr11:114968748-114969248	Rab37	0.692927	5.27454e-70	0.526819	0.292751	1
chr11:114989687-114990187	Rab37	0.706324	6.62409e-74	0.32375	0.292751	1
chr11:115001436-115001936	Rab37	0.699221	8.24769e-72	0.558032	0.292751	1
chr11:115004064-115004564	Rab37	0.795772	4.45677e-107	0.753879	0.292751	1
chr11:115119344-115119844	Rab37	0.767575	5.17138e-95	0.551936	0.292751	1
chr11:115133722-115134222	Rab37	0.813525	1.08403e-115	0.887358	0.292751	1
chr11:115138888-115139388	Rab37	0.780351	2.95021e-100	0.790682	0.292751	1
chr11:115141855-115142355	Rab37	0.626853	1.54051e-53	0.251787	0.292751	1
chr11:115153822-115154322	Rab37	0.735666	2.81239e-83	0.963686	0.292751	1
chr11:115172739-115173239	Rab37	0.568634	4.93366e-42	0.7766	0.292751	1
chr11:115173499-115173999	Rab37	0.764496	8.43487e-94	0.832504	0.292751	1
chr11:115188660-115189160	Rab37	0.861182	2.77595e-144	0.821716	0.292751	1
chr11:115189203-115189703	Rab37	0.793281	6.16855e-106	0.75322	0.292751	1
chr11:115190350-115190850	Rab37	0.739496	1.35969e-84	0.671347	0.292751	1
chr11:115191958-115192458	Rab37	0.594099	8.94248e-47	0.453142	0.292751	1
chr11:114890083-114890583	Cd300lf	0.700132	4.48325e-72	0.874304	0.684294	1
chr11:114897957-114898457	Cd300lf	0.679019	3.55626e-66	0.711366	0.684294	1
chr11:114907518-114908018	Cd300lf	0.873685	1.32443e-153	0.857908	0.684294	1
chr11:114908110-114908610	Cd300lf	0.714317	2.42484e-76	0.33771	0.684294	1
chr11:114912744-114913244	Cd300lf	0.621913	1.81282e-52	0.89031	0.684294	1
chr11:114917014-114917514	Cd300lf	0.918386	1.84717e-197	0.839327	0.684294	1
chr11:114927019-114927519	Cd300lf	0.810858	2.43963e-114	0.527061	0.684294	1
chr11:114930984-114931484	Cd300lf	0.819213	1.18966e-118	0.479362	0.684294	1
chr11:114934190-114934690	Cd300lf	0.764724	6.86585e-94	0.460055	0.684294	1
chr11:114965359-114965859	Cd300lf	0.646969	4.08143e-58	0.584997	0.684294	1
chr11:114968748-114969248	Cd300lf	0.754711	4.59376e-90	0.526819	0.684294	1
chr11:114989687-114990187	Cd300lf	0.795446	6.29081e-107	0.32375	0.684294	1
chr11:115001436-115001936	Cd300lf	0.619961	4.74816e-52	0.558032	0.684294	1
chr11:115004064-115004564	Cd300lf	0.876474	8.03229e-156	0.753879	0.684294	1
chr11:115119344-115119844	Cd300lf	0.879785	1.60903e-158	0.551936	0.684294	1
chr11:115133722-115134222	Cd300lf	0.916195	8.84584e-195	0.887358	0.684294	1
chr11:115138888-115139388	Cd300lf	0.840001	2.0343e-130	0.790682	0.684294	1
chr11:115141855-115142355	Cd300lf	0.67606	2.18164e-65	0.251787	0.684294	1
chr11:115153822-115154322	Cd300lf	0.737176	8.57387e-84	0.963686	0.684294	1
chr11:115172739-115173239	Cd300lf	0.580571	3.33638e-44	0.7766	0.684294	1
chr11:115173499-115173999	Cd300lf	0.763547	1.98112e-93	0.832504	0.684294	1
chr11:115188660-115189160	Cd300lf	0.892928	4.54892e-170	0.821716	0.684294	1
chr11:115189203-115189703	Cd300lf	0.824516	1.66135e-121	0.75322	0.684294	1
chr11:115190350-115190850	Cd300lf	0.791638	3.4293e-105	0.671347	0.684294	1
chr11:115191958-115192458	Cd300lf	0.542657	1.30969e-37	0.453142	0.684294	1
chr11:114917014-114917514	Slc9a3r1	0.533605	3.70492e-36	0.839327	0.808649	1
chr11:114968748-114969248	Slc9a3r1	0.558569	2.84351e-40	0.526819	0.808649	1
chr11:115004064-115004564	Slc9a3r1	0.590131	5.23287e-46	0.753879	0.808649	1
chr11:115133722-115134222	Slc9a3r1	0.554468	1.42732e-39	0.887358	0.808649	1
chr11:115138888-115139388	Slc9a3r1	0.529396	1.69451e-35	0.790682	0.808649	1
chr11:115153822-115154322	Slc9a3r1	0.696441	5.24532e-71	0.963686	0.808649	1
chr11:115188660-115189160	Slc9a3r1	0.553033	2.49573e-39	0.821716	0.808649	1
chr11:115189203-115189703	Slc9a3r1	0.540891	2.53323e-37	0.75322	0.808649	1
chr11:114965359-114965859	Tmem104	0.589621	6.55274e-46	0.584997	0.388313	1
chr11:114968748-114969248	Tmem104	0.755233	2.93841e-90	0.526819	0.388313	1
chr11:115001436-115001936	Tmem104	0.811387	1.31873e-114	0.558032	0.388313	1
chr11:115004064-115004564	Tmem104	0.599428	8.02942e-48	0.753879	0.388313	1
chr11:115138888-115139388	Tmem104	0.677838	7.34701e-66	0.790682	0.388313	1
chr11:115153822-115154322	Tmem104	0.51419	3.44604e-33	0.963686	0.388313	1
chr11:115172739-115173239	Tmem104	0.592402	1.90879e-46	0.7766	0.388313	1
chr11:115188660-115189160	Tmem104	0.559695	1.82136e-40	0.821716	0.388313	1
chr11:115189203-115189703	Tmem104	0.644111	1.91276e-57	0.75322	0.388313	1
chr11:115191958-115192458	Tmem104	0.511705	8.00031e-33	0.453142	0.388313	1
chr11:114968748-114969248	Nat9	0.534469	2.70644e-36	0.526819	0.547129	1
chr11:115001436-115001936	Nat9	0.533245	4.22357e-36	0.558032	0.547129	1
chr11:115902764-115903264	Smim5	0.624123	6.04891e-53	0.621387	0.275237	1
chr11:116077384-116077884	Smim5	0.811794	8.2089e-115	0.944863	0.275237	1
chr11:116077384-116077884	Unc13d	0.557193	4.90398e-40	0.944863	0.339511	1
chr11:116436725-116437225	Acox1	0.521421	2.8522e-34	0.914619	0.404693	1
chr11:116616002-116616502	Rhbdf2	0.524384	1.0074e-34	0.855382	0.501842	1
chr11:117768973-117769473	Syngr2	0.522828	1.74144e-34	0.407991	0.863062	1
chr11:117782047-117782547	Syngr2	0.627921	8.96854e-54	0.703839	0.863062	1
chr11:117792186-117792686	Syngr2	0.5954	4.99049e-47	0.868917	0.863062	1
chr11:117832009-117832509	Syngr2	0.67035	6.77057e-64	0.931401	0.863062	1
chr11:117946305-117946805	Syngr2	0.515395	2.28444e-33	0.65919	0.863062	1
chr11:117959866-117960366	Syngr2	0.616834	2.19241e-51	0.87661	0.863062	1
chr11:117976024-117976524	Syngr2	0.614873	5.66339e-51	0.827597	0.863062	1
chr11:117991689-117992189	Syngr2	0.750892	1.18573e-88	0.946954	0.863062	1
chr11:117993165-117993665	Syngr2	0.544631	6.23737e-38	0.592812	0.863062	1
chr11:117782047-117782547	Pgs1	0.526232	5.24027e-35	0.703839	0.586295	1
chr11:117792186-117792686	Pgs1	0.63529	2.03598e-55	0.868917	0.586295	1
chr11:117832009-117832509	Pgs1	0.667521	3.61558e-63	0.931401	0.586295	1
chr11:118145620-118146120	Pgs1	0.501607	2.28876e-31	0.990562	0.586295	1
chr11:118152961-118153461	Lgals3bp	0.662325	7.46799e-62	0.722751	0.528141	1
chr11:118211658-118212158	Lgals3bp	0.667159	4.47523e-63	0.837789	0.528141	1
chr11:118212700-118213200	Lgals3bp	0.62325	9.34414e-53	0.882155	0.528141	1
chr11:118234850-118235350	Lgals3bp	0.676524	1.64294e-65	0.662837	0.528141	1
chr11:118275043-118275543	Lgals3bp	0.683592	2.06825e-67	0.64309	0.528141	1
chr11:118456929-118457429	Lgals3bp	0.565607	1.69581e-41	0.755575	0.528141	1
chr11:119856660-119857160	Aatk	0.604355	8.2894e-49	0.643817	0.299949	1
chr11:119863233-119863733	Aatk	0.57598	2.33724e-43	0.852911	0.299949	1
chr11:119875608-119876108	Aatk	0.663656	3.45658e-62	0.745369	0.299949	1
chr11:119925169-119925669	Aatk	0.534871	2.33827e-36	0.888906	0.299949	1
chr11:120034792-120035292	Aatk	0.651413	3.56594e-59	0.619202	0.299949	1
chr11:120041773-120042273	Aatk	0.55286	2.6687e-39	0.798312	0.299949	1
chr11:120063867-120064367	Aatk	0.630396	2.5435e-54	0.319578	0.299949	1
chr11:120150260-120150760	Aatk	0.515396	2.28318e-33	0.649029	0.299949	1
chr11:120158811-120159311	Aatk	0.66978	9.50271e-64	0.531458	0.299949	1
chr11:120209255-120209755	Aatk	0.530221	1.261e-35	0.286283	0.299949	1
chr11:120218870-120219370	Aatk	0.684291	1.33329e-67	0.833173	0.299949	1
chr11:120268512-120269012	Aatk	0.512304	6.53498e-33	0.676851	0.299949	1
chr11:120938786-120939286	Dcxr	0.54341	9.8744e-38	0.911694	0.792382	1
chr11:120957567-120958067	Dcxr	0.561581	8.58747e-41	0.807293	0.792382	1
chr11:120938786-120939286	Cbr2	0.565244	1.96395e-41	0.911694	0.678173	1
chr11:120957567-120958067	Cbr2	0.595912	3.96698e-47	0.807293	0.678173	1
chr11:121741367-121741867	Metrnl	0.638395	4.00694e-56	0.255725	0.648246	1
chr11:121747993-121748493	Metrnl	0.551035	5.4096e-39	0.414886	0.648246	1
chr11:121804605-121805105	Metrnl	0.665843	9.67983e-63	0.691745	0.648246	1
chr12:31996757-31997257	Pik3cg	0.745853	7.8904e-87	0.524648	0.541348	1
chr12:32017556-32018056	Pik3cg	0.807227	1.55968e-112	0.824281	0.541348	1
chr12:32208275-32208775	Pik3cg	0.816155	4.76688e-117	0.668436	0.541348	1
chr12:32292748-32293248	Pik3cg	0.613026	1.37872e-50	0.570144	0.541348	1
chr12:32952368-32952868	Nampt	0.541692	1.87889e-37	0.80894	0.72363	1
chr12:33158161-33158661	Sypl	0.51322	4.79278e-33	0.326962	0.790568	1
chr12:33169975-33170475	Atxn7l1	0.636119	1.32181e-55	0.818674	0.542538	1
chr12:33315103-33315603	Atxn7l1	0.648299	1.97858e-58	0.791108	0.542538	1
chr12:33316139-33316639	Atxn7l1	0.570274	2.51804e-42	0.325813	0.542538	1
chr12:54999000-54999500	Baz1a	0.805617	9.56144e-112	0.918953	0.799807	1
chr12:70102324-70102824	Pygl	0.772155	7.4875e-97	0.79868	0.88443	1
chr12:70110127-70110627	Pygl	0.604111	9.27973e-49	0.450276	0.88443	1
chr12:70219131-70219631	Pygl	0.737238	8.16543e-84	0.672621	0.88443	1
chr12:70221379-70221879	Pygl	0.759077	1.03914e-91	0.588245	0.88443	1
chr12:70225458-70225958	Pygl	0.656942	1.6165e-60	0.538729	0.88443	1
chr12:70226918-70227418	Pygl	0.62656	1.78488e-53	0.936686	0.88443	1
chr12:70227523-70228023	Pygl	0.659196	4.49576e-61	0.994671	0.88443	1
chr12:70233557-70234057	Pygl	0.819074	1.4071e-118	0.824618	0.88443	1
chr12:70238454-70238954	Pygl	0.674796	4.69808e-65	0.528246	0.88443	1
chr12:73610708-73611208	Prkch	0.52291	1.69214e-34	0.700429	0.50717	1
chr12:73617588-73618088	Prkch	0.655197	4.32098e-60	0.45552	0.50717	1
chr12:79131956-79132456	Rdh12	0.751185	9.25696e-89	0.653601	0.458142	1
chr12:79253190-79253690	Rdh12	0.752144	4.10393e-89	0.285525	0.458142	1
chr12:79320851-79321351	Rdh12	0.678517	4.84321e-66	0.344793	0.458142	1
chr12:83885051-83885551	Riox1	0.516489	1.56932e-33	0.477232	0.55121	1
chr12:84751937-84752437	Npc2	0.561783	7.9191e-41	0.446265	0.947004	1
chr12:84762660-84763160	Npc2	0.566564	1.14921e-41	0.31908	0.947004	1
chr12:85629598-85630098	Jdp2	0.513125	4.94944e-33	0.764201	0.400385	1
chr12:85468602-85469102	Batf	0.858318	2.80396e-142	0.826085	0.485462	1
chr12:85489301-85489801	Batf	0.638179	4.48915e-56	0.438953	0.485462	1
chr12:85545746-85546246	Batf	0.532263	6.02668e-36	0.386261	0.485462	1
chr12:85569711-85570211	Batf	0.758307	2.04221e-91	0.747769	0.485462	1
chr12:85597964-85598464	Batf	0.739262	1.63835e-84	0.683979	0.485462	1
chr12:85629598-85630098	Batf	0.775263	3.97582e-98	0.764201	0.485462	1
chr12:85686430-85686930	Batf	0.587486	1.67421e-45	0.716139	0.485462	1
chr12:85687055-85687555	Batf	0.630345	2.61044e-54	0.636168	0.485462	1
chr12:85704494-85704994	Batf	0.526847	4.21116e-35	0.49042	0.485462	1
chr12:85710537-85711037	Batf	0.890465	8.5863e-168	0.781257	0.485462	1
chr12:98282661-98283161	Gpr65	0.520668	3.70526e-34	0.438805	0.536927	1
chr12:98283253-98283753	Gpr65	0.647031	3.94462e-58	0.5992	0.536927	1
chr12:102354419-102354919	Lgmn	0.636199	1.2677e-55	0.724151	0.976591	1
chr12:102365103-102365603	Lgmn	0.522687	1.82902e-34	0.838968	0.976591	1
chr12:102367974-102368474	Lgmn	0.632729	7.6718e-55	0.712366	0.976591	1
chr12:102445410-102445910	Lgmn	0.560528	1.30779e-40	0.803951	0.976591	1
chr12:102645929-102646429	Lgmn	0.565526	1.75198e-41	0.399051	0.976591	1
chr12:102646484-102646984	Lgmn	0.545543	4.41979e-38	0.862421	0.976591	1
chr12:102647025-102647525	Lgmn	0.558899	2.4951e-40	0.501227	0.976591	1
chr12:102647025-102647525	Tmem251	0.525034	8.00808e-35	0.501227	0.5944	1
chr12:102690131-102690631	Tmem251	0.551494	4.53192e-39	0.74008	0.5944	1
chr12:103341118-103341618	Ifi27l2a	0.594036	9.19939e-47	0.908568	0.948251	1
chr12:103343432-103343932	Ifi27l2a	0.547283	2.28333e-38	0.877135	0.948251	1
chr12:111432094-111432594	Tnfaip2	0.758573	1.61761e-91	0.759796	0.531882	1
chr12:111432853-111433353	Tnfaip2	0.598643	1.14973e-47	0.692745	0.531882	1
chr12:111437482-111437982	Tnfaip2	0.755478	2.38063e-90	0.947349	0.531882	1
chr12:111441569-111442069	Tnfaip2	0.827162	5.75472e-123	0.918289	0.531882	1
chr12:111442344-111442844	Tnfaip2	0.760642	2.62214e-92	0.995528	0.531882	1
chr12:111444113-111444613	Tnfaip2	0.578566	7.83426e-44	0.451379	0.531882	1
chr12:111455900-111456400	Tnfaip2	0.592296	2.00136e-46	0.746347	0.531882	1
chr12:111524867-111525367	Tnfaip2	0.750223	2.08005e-88	0.569512	0.531882	1
chr12:111559626-111560126	Tnfaip2	0.598258	1.37001e-47	0.616484	0.531882	1
chr12:112617176-112617676	Adssl1	0.758357	1.95506e-91	0.80409	0.748909	1
chr12:112619733-112620233	Adssl1	0.643787	2.2768e-57	0.985134	0.748909	1
chr12:112628002-112628502	Adssl1	0.507537	3.23711e-32	0.779754	0.748909	1
chr12:112629218-112629718	Adssl1	0.917188	5.59581e-196	0.991732	0.748909	1
chr12:112632888-112633388	Adssl1	0.901302	3.05811e-178	0.828866	0.748909	1
chr12:112667970-112668470	Adssl1	0.696765	4.22925e-71	0.639658	0.748909	1
chr12:112688279-112688779	Adssl1	0.930629	5.21658e-214	0.842176	0.748909	1
chr12:112760446-112760946	Adssl1	0.522528	1.93397e-34	0.579973	0.748909	1
chr12:112761906-112762406	Adssl1	0.50949	1.68565e-32	0.779319	0.748909	1
chr12:112859908-112860408	Adssl1	0.70493	1.73014e-73	0.547495	0.748909	1
chr12:112860694-112861194	Adssl1	0.774084	1.21736e-97	0.831845	0.748909	1
chr12:112863442-112863942	Adssl1	0.523454	1.39795e-34	0.251459	0.748909	1
chr12:112864774-112865274	Adssl1	0.855319	3.16334e-140	0.8472	0.748909	1
chr12:112866463-112866963	Adssl1	0.524527	9.57583e-35	0.715569	0.748909	1
chr12:112866967-112867467	Adssl1	0.82167	5.81601e-120	0.731719	0.748909	1
chr12:112617176-112617676	Pld4	0.80124	1.22287e-109	0.80409	0.893726	1
chr12:112619733-112620233	Pld4	0.64973	9.03147e-59	0.985134	0.893726	1
chr12:112628002-112628502	Pld4	0.697774	2.16284e-71	0.779754	0.893726	1
chr12:112629218-112629718	Pld4	0.864111	2.19431e-146	0.991732	0.893726	1
chr12:112632888-112633388	Pld4	0.78677	5.0329e-103	0.828866	0.893726	1
chr12:112667970-112668470	Pld4	0.723956	2.16928e-79	0.639658	0.893726	1
chr12:112688279-112688779	Pld4	0.757577	3.86603e-91	0.842176	0.893726	1
chr12:112702208-112702708	Pld4	0.586917	2.14831e-45	0.289468	0.893726	1
chr12:112760446-112760946	Pld4	0.761198	1.60435e-92	0.579973	0.893726	1
chr12:112761402-112761902	Pld4	0.744153	3.17736e-86	0.423836	0.893726	1
chr12:112761906-112762406	Pld4	0.819445	8.97716e-119	0.779319	0.893726	1
chr12:112859908-112860408	Pld4	0.86806	2.68982e-149	0.547495	0.893726	1
chr12:112860694-112861194	Pld4	0.864748	7.57919e-147	0.831845	0.893726	1
chr12:112863442-112863942	Pld4	0.621957	1.77381e-52	0.251459	0.893726	1
chr12:112864774-112865274	Pld4	0.820076	4.15798e-119	0.8472	0.893726	1
chr12:112866463-112866963	Pld4	0.752413	3.27166e-89	0.715569	0.893726	1
chr12:112866967-112867467	Pld4	0.86612	7.4315e-148	0.731719	0.893726	1
chr12:112917387-112917887	Pld4	0.643198	3.12297e-57	0.717561	0.893726	1
chr13:9093578-9094078	Larp4b	0.517578	1.07925e-33	0.997708	0.703905	1
chr13:13523743-13524243	Gpr137b	0.524093	1.11645e-34	0.954454	0.596044	1
chr13:13529100-13529600	Gpr137b	0.50773	3.03487e-32	0.964853	0.596044	1
chr13:13523743-13524243	Lyst	0.649107	1.27177e-58	0.954454	0.504903	1
chr13:13525797-13526297	Lyst	0.572427	1.0335e-42	0.856966	0.504903	1
chr13:13529100-13529600	Lyst	0.6445	1.55267e-57	0.964853	0.504903	1
chr13:13558846-13559346	Lyst	0.565534	1.7461e-41	0.538052	0.504903	1
chr13:19828020-19828520	Gpr141	0.544421	6.74989e-38	0.286252	0.648983	1
chr13:19854910-19855410	Gpr141	0.83605	4.66241e-128	0.523836	0.648983	1
chr13:19921277-19921777	Gpr141	0.58293	1.21274e-44	0.508557	0.648983	1
chr13:20091237-20091737	Elmo1	0.59213	2.15458e-46	0.903557	0.794933	1
chr13:20092295-20092795	Elmo1	0.567629	7.44287e-42	0.590856	0.794933	1
chr13:20093325-20093825	Elmo1	0.581007	2.76928e-44	0.627021	0.794933	1
chr13:20111275-20111775	Elmo1	0.544553	6.42531e-38	0.299064	0.794933	1
chr13:20184979-20185479	Elmo1	0.538789	5.52875e-37	0.819289	0.794933	1
chr13:20786891-20787391	Aoah	0.646266	5.97943e-58	0.350302	0.538967	1
chr13:31004395-31004895	Exoc2	0.570661	2.14633e-42	0.311243	0.366094	1
chr13:31004927-31005427	Exoc2	0.606207	3.49242e-49	0.644023	0.366094	1
chr13:40921270-40921770	Tmem14c	0.525507	6.77621e-35	0.455578	0.835686	1
chr13:41828345-41828845	Adtrp	0.900419	2.39755e-177	0.512572	0.264638	1
chr13:43765220-43765720	Cd83	0.807286	1.45836e-112	0.890727	0.809159	1
chr13:43767784-43768284	Cd83	0.730912	1.12332e-81	0.582943	0.809159	1
chr13:43774102-43774602	Cd83	0.559253	2.17003e-40	0.538442	0.809159	1
chr13:43776838-43777338	Cd83	0.744252	2.9309e-86	0.545503	0.809159	1
chr13:43777536-43778036	Cd83	0.508683	2.20806e-32	0.437706	0.809159	1
chr13:43778129-43778629	Cd83	0.604152	9.10713e-49	0.745105	0.809159	1
chr13:49187818-49188318	Ninj1	0.570212	2.5821e-42	0.976032	0.826787	1
chr13:49309028-49309528	Ninj1	0.501992	2.01759e-31	0.773752	0.826787	1
chr13:49196786-49197286	Fgd3	0.950208	5.04635e-248	0.889965	0.440005	1
chr13:49199829-49200329	Fgd3	0.792267	1.77671e-105	0.558876	0.440005	1
chr13:49200637-49201137	Fgd3	0.907688	5.37617e-185	0.874277	0.440005	1
chr13:49205666-49206166	Fgd3	0.519276	6.00455e-34	0.972246	0.440005	1
chr13:49213495-49213995	Fgd3	0.550239	7.35449e-39	0.946851	0.440005	1
chr13:49242011-49242511	Fgd3	0.812007	6.40679e-115	0.738232	0.440005	1
chr13:49242655-49243155	Fgd3	0.881058	1.40744e-159	0.83346	0.440005	1
chr13:49243253-49243753	Fgd3	0.573689	6.10795e-43	0.585266	0.440005	1
chr13:49272074-49272574	Fgd3	0.882935	3.66579e-161	0.870132	0.440005	1
chr13:49298298-49298798	Fgd3	0.721771	1.09233e-78	0.816969	0.440005	1
chr13:49300688-49301188	Fgd3	0.724426	1.52828e-79	0.392178	0.440005	1
chr13:49306675-49307175	Fgd3	0.630769	2.1023e-54	0.488917	0.440005	1
chr13:49309028-49309528	Fgd3	0.882239	1.42661e-160	0.773752	0.440005	1
chr13:51733962-51734462	Sema4d	0.532082	6.43641e-36	0.707984	0.509891	1
chr13:51734488-51734988	Sema4d	0.56982	3.03434e-42	0.907356	0.509891	1
chr13:51739683-51740183	Sema4d	0.562381	6.23178e-41	0.791723	0.509891	1
chr13:51740680-51741180	Sema4d	0.558763	2.63349e-40	0.954764	0.509891	1
chr13:51754148-51754648	Sema4d	0.51626	1.69809e-33	0.306833	0.509891	1
chr13:51792100-51792600	Sema4d	0.546052	3.64686e-38	0.538711	0.509891	1
chr13:52571892-52572392	Syk	0.799436	8.72644e-109	0.654363	0.659242	1
chr13:52572419-52572919	Syk	0.723202	3.80096e-79	0.645943	0.659242	1
chr13:52582639-52583139	Syk	0.688813	7.53605e-69	0.909084	0.659242	1
chr13:52596861-52597361	Syk	0.617453	1.62153e-51	0.31389	0.659242	1
chr13:52610524-52611024	Syk	0.80194	5.68416e-110	0.472284	0.659242	1
chr13:52614671-52615171	Syk	0.769068	1.3178e-95	0.480502	0.659242	1
chr13:52619429-52619929	Syk	0.62817	7.9084e-54	0.468798	0.659242	1
chr13:52636317-52636817	Syk	0.807223	1.56502e-112	0.864673	0.659242	1
chr13:52793512-52794012	Syk	0.64614	6.40235e-58	0.441438	0.659242	1
chr13:55020875-55021375	Hk3	0.800567	2.55362e-109	0.34687	0.632886	1
chr13:55369203-55369703	Rgs14	0.798651	2.04616e-108	0.565403	0.379924	1
chr13:55369725-55370225	Rgs14	0.733028	2.19984e-82	0.659015	0.379924	1
chr13:55429172-55429672	Rgs14	0.692596	6.54505e-70	0.779561	0.379924	1
chr13:55447573-55448073	Rgs14	0.761172	1.64098e-92	0.903063	0.379924	1
chr13:55449632-55450132	Rgs14	0.66796	2.79106e-63	0.640071	0.379924	1
chr13:55465815-55466315	Rgs14	0.554626	1.34197e-39	0.645844	0.379924	1
chr13:55528327-55528827	Rgs14	0.699922	5.15981e-72	0.836183	0.379924	1
chr13:55529583-55530083	Rgs14	0.556192	7.268e-40	0.605592	0.379924	1
chr13:55369203-55369703	Dok3	0.884575	1.42784e-162	0.565403	0.623307	1
chr13:55369725-55370225	Dok3	0.779417	7.3374e-100	0.659015	0.623307	1
chr13:55429172-55429672	Dok3	0.788814	6.28964e-104	0.779561	0.623307	1
chr13:55447573-55448073	Dok3	0.909452	6.04794e-187	0.903063	0.623307	1
chr13:55449632-55450132	Dok3	0.783297	1.62556e-101	0.640071	0.623307	1
chr13:55465815-55466315	Dok3	0.644099	1.92528e-57	0.645844	0.623307	1
chr13:55528327-55528827	Dok3	0.815276	1.36094e-116	0.836183	0.623307	1
chr13:55529058-55529558	Dok3	0.549189	1.10092e-38	0.453654	0.623307	1
chr13:55529583-55530083	Dok3	0.661219	1.41139e-61	0.605592	0.623307	1
chr13:56178476-56178976	Tifab	0.663811	3.15714e-62	0.507413	0.400159	1
chr13:56181506-56182006	Tifab	0.821126	1.14078e-119	0.633445	0.400159	1
chr13:56183337-56183837	Tifab	0.699279	7.93062e-72	0.358215	0.400159	1
chr13:56334884-56335384	Tifab	0.61559	4.00735e-51	0.339069	0.400159	1
chr13:56352372-56352872	Tifab	0.712681	7.76685e-76	0.74829	0.400159	1
chr13:56353192-56353692	Tifab	0.783312	1.60195e-101	0.744441	0.400159	1
chr13:60936387-60936887	Ctla2a	0.796221	2.76628e-107	0.428277	0.892252	1
chr13:75789045-75789545	Glrx	0.593147	1.36942e-46	0.574518	0.925806	1
chr13:75794211-75794711	Glrx	0.691942	1.00301e-69	0.418246	0.925806	1
chr13:75823163-75823663	Glrx	0.741212	3.43811e-85	0.58929	0.925806	1
chr13:75824574-75825074	Glrx	0.757103	5.8301e-91	0.709213	0.925806	1
chr13:75845772-75846272	Glrx	0.717393	2.6642e-77	0.361687	0.925806	1
chr13:76579431-76579931	Mctp1	0.672934	1.44458e-64	0.346431	0.300062	1
chr13:76620475-76620975	Mctp1	0.697678	2.3055e-71	0.319493	0.300062	1
chr13:97187524-97188024	Hexb	0.818915	1.70874e-118	0.579215	0.956527	1
chr13:100183047-100183547	Naip2	0.910491	4.06255e-188	0.748106	0.365867	1
chr13:100201689-100202189	Naip2	0.794175	2.40779e-106	0.281483	0.365867	1
chr13:100183047-100183547	Naip5	0.642157	5.45333e-57	0.748106	0.261123	1
chr13:105299855-105300355	Rnf180	0.533383	4.01733e-36	0.482853	0.425268	1
chr13:108267762-108268262	Elovl7	0.819615	7.29794e-119	0.654924	0.283739	1
chr13:110356709-110357209	Gapt	0.92071	2.16086e-200	0.351002	0.271552	1
chr13:110363362-110363862	Gapt	0.876534	7.18667e-156	0.333309	0.271552	1
chr13:110568473-110568973	Gapt	0.891168	1.95012e-168	0.734935	0.271552	1
chr13:110569056-110569556	Gapt	0.881959	2.45441e-160	0.513783	0.271552	1
chr13:117036231-117036731	Emb	0.684976	8.65877e-68	0.540075	0.91328	1
chr13:117195917-117196417	Emb	0.650329	6.49616e-59	0.631611	0.91328	1
chr13:117211364-117211864	Emb	0.712294	1.02159e-75	0.563985	0.91328	1
chr13:117220911-117221411	Emb	0.718585	1.12315e-77	0.868934	0.91328	1
chr13:117235473-117235973	Emb	0.703263	5.40624e-73	0.79541	0.91328	1
chr14:30553153-30553653	Tkt	0.63361	4.86786e-55	0.681844	0.94094	1
chr14:30617263-30617763	Tkt	0.568373	5.48907e-42	0.309224	0.94094	1
chr14:30693577-30694077	Tkt	0.599066	9.47216e-48	0.577923	0.94094	1
chr14:30553153-30553653	Prkcd	0.605717	4.39514e-49	0.681844	0.654877	1
chr14:30619904-30620404	Prkcd	0.742044	1.75847e-85	0.672172	0.654877	1
chr14:30641765-30642265	Prkcd	0.720053	3.85165e-78	0.448602	0.654877	1
chr14:30693577-30694077	Prkcd	0.538521	6.10479e-37	0.577923	0.654877	1
chr14:30944210-30944710	Stab1	0.589622	6.55187e-46	0.520911	0.878705	1
chr14:31160398-31160898	Stab1	0.826411	1.50834e-122	0.788403	0.878705	1
chr14:31166372-31166872	Stab1	0.531884	6.91616e-36	0.772873	0.878705	1
chr14:31188941-31189441	Stab1	0.784981	3.04255e-102	0.504591	0.878705	1
chr14:31389779-31390279	Stab1	0.640134	1.59817e-56	0.845661	0.878705	1
chr14:31392742-31393242	Stab1	0.837405	7.3468e-129	0.785438	0.878705	1
chr14:31406089-31406589	Stab1	0.583561	9.24213e-45	0.563092	0.878705	1
chr14:31407783-31408283	Stab1	0.539665	3.99778e-37	0.654004	0.878705	1
chr14:31413598-31414098	Stab1	0.66173	1.05249e-61	0.720881	0.878705	1
chr14:31389779-31390279	Mettl6	0.515744	2.02649e-33	0.845661	0.661452	1
chr14:31392742-31393242	Mettl6	0.504173	9.85569e-32	0.785438	0.661452	1
chr14:31422352-31422852	Mettl6	0.52041	4.05408e-34	0.686895	0.661452	1
chr14:33185185-33185685	Wdfy4	0.953089	3.79074e-254	0.928835	0.308678	1
chr14:33194102-33194602	Wdfy4	0.825644	3.99602e-122	0.692906	0.308678	1
chr14:33231993-33232493	Wdfy4	0.649513	1.01829e-58	0.536872	0.308678	1
chr14:33247596-33248096	Wdfy4	0.778195	2.39839e-99	0.782486	0.308678	1
chr14:44091449-44091949	Ear2	0.834144	6.07283e-127	0.639456	0.441025	1
chr14:44891268-44891768	Ptger2	0.624944	4.01189e-53	0.256026	0.330726	1
chr14:44987964-44988464	Ptger2	0.684041	1.5612e-67	0.596549	0.330726	1
chr14:45041190-45041690	Ptger2	0.620164	4.29842e-52	0.292577	0.330726	1
chr14:45155514-45156014	Ptger2	0.68114	9.57756e-67	0.519633	0.330726	1
chr14:47187919-47188419	Gch1	0.523297	1.47734e-34	0.443448	0.466474	1
chr14:47361904-47362404	Gch1	0.535298	2.00081e-36	0.43994	0.466474	1
chr14:47373629-47374129	Gch1	0.602563	1.90214e-48	0.844069	0.466474	1
chr14:47374218-47374718	Gch1	0.631616	1.36067e-54	0.829566	0.466474	1
chr14:47187919-47188419	Lgals3	0.663255	4.36105e-62	0.443448	0.967012	1
chr14:47361904-47362404	Lgals3	0.731859	5.42512e-82	0.43994	0.967012	1
chr14:47373629-47374129	Lgals3	0.711314	2.0393e-75	0.844069	0.967012	1
chr14:47374218-47374718	Lgals3	0.795403	6.58427e-107	0.829566	0.967012	1
chr14:50833971-50834471	Tep1	0.699341	7.61027e-72	0.767176	0.412515	1
chr14:50833971-50834471	Pnp	0.645645	8.37398e-58	0.767176	0.854333	1
chr14:54222434-54222934	Slc7a7	0.697772	2.16446e-71	0.76107	0.603922	1
chr14:54227331-54227831	Slc7a7	0.714346	2.3772e-76	0.927561	0.603922	1
chr14:54409761-54410261	Slc7a7	0.576906	1.58134e-43	0.750353	0.603922	1
chr14:54711920-54712420	Cebpe	0.748887	6.36458e-88	0.649743	0.922746	1
chr14:55590039-55590539	Ltb4r1	0.579498	5.2756e-44	0.393789	0.912997	1
chr14:55728430-55728930	Ltb4r1	0.527056	3.9095e-35	0.653381	0.912997	1
chr14:55764127-55764627	Ltb4r1	0.690101	3.29865e-69	0.547114	0.912997	1
chr14:55765707-55766207	Ltb4r1	0.702235	1.08632e-72	0.629749	0.912997	1
chr14:59556746-59557246	Phf11b	0.52917	1.8369e-35	0.605834	0.382758	1
chr14:60269294-60269794	Amer2	0.584088	7.36043e-45	0.760837	0.397325	1
chr14:60273571-60274071	Amer2	0.670679	5.5696e-64	0.342923	0.397325	1
chr14:60384139-60384639	Amer2	0.742843	9.2258e-86	0.695567	0.397325	1
chr14:60422808-60423308	Amer2	0.702212	1.10362e-72	0.313589	0.397325	1
chr14:60431779-60432279	Amer2	0.536542	1.26776e-36	0.335678	0.397325	1
chr14:61309528-61310028	Arl11	0.840722	7.44245e-131	0.62887	0.602449	1
chr14:61310186-61310686	Arl11	0.716362	5.60805e-77	0.803808	0.602449	1
chr14:61518763-61519263	Arl11	0.693658	3.27214e-70	0.632768	0.602449	1
chr14:64433995-64434495	Msra	0.676391	1.78229e-65	0.525698	0.619226	1
chr14:64792552-64793052	Ints9	0.567377	8.25018e-42	0.661909	0.395284	1
chr14:69853794-69854294	Bin3	0.650133	7.23599e-59	0.659697	0.645128	1
chr14:70022295-70022795	Bin3	0.539585	4.11703e-37	0.749025	0.645128	1
chr14:70024547-70025047	Bin3	0.755445	2.44867e-90	0.816732	0.645128	1
chr14:70051552-70052052	Bin3	0.707399	3.15367e-74	0.665076	0.645128	1
chr14:70054185-70054685	Bin3	0.769483	8.98458e-96	0.889893	0.645128	1
chr14:70056328-70056828	Bin3	0.715343	1.16609e-76	0.89419	0.645128	1
chr14:70056839-70057339	Bin3	0.795979	3.57912e-107	0.992823	0.645128	1
chr14:70061579-70062079	Bin3	0.578989	6.54831e-44	0.821603	0.645128	1
chr14:70065797-70066297	Bin3	0.791609	3.53571e-105	0.987839	0.645128	1
chr14:70066341-70066841	Bin3	0.779885	4.64936e-100	0.480363	0.645128	1
chr14:70067803-70068303	Bin3	0.54038	3.06499e-37	0.914669	0.645128	1
chr14:70069359-70069859	Bin3	0.676142	2.07562e-65	0.319874	0.645128	1
chr14:70100603-70101103	Bin3	0.53286	4.85381e-36	0.443937	0.645128	1
chr14:70101173-70101673	Bin3	0.547321	2.25036e-38	0.589766	0.645128	1
chr14:70133400-70133900	Bin3	0.577312	1.33217e-43	0.593359	0.645128	1
chr14:70175159-70175659	Bin3	0.739121	1.83324e-84	0.928736	0.645128	1
chr14:70175681-70176181	Bin3	0.655599	3.44964e-60	0.898259	0.645128	1
chr14:70333590-70334090	Bin3	0.686828	2.67704e-68	0.767355	0.645128	1
chr14:70781219-70781719	Dok2	0.59575	4.26579e-47	0.84454	0.568781	1
chr14:73138479-73138979	Lpar6	0.588265	1.19029e-45	0.377662	0.775435	1
chr14:73441974-73442474	Lpar6	0.627517	1.10095e-53	0.753193	0.775435	1
chr14:73138479-73138979	Itm2b	0.548316	1.53863e-38	0.377662	0.954146	1
chr14:73441974-73442474	Itm2b	0.554469	1.42655e-39	0.753193	0.954146	1
chr14:75032030-75032530	Lcp1	0.869496	2.23937e-150	0.276643	0.973191	1
chr14:75034085-75034585	Lcp1	0.893173	2.68416e-170	0.44644	0.973191	1
chr14:75056902-75057402	Lcp1	0.871417	7.63473e-152	0.87595	0.973191	1
chr14:75068401-75068901	Lcp1	0.762678	4.30726e-93	0.775986	0.973191	1
chr14:75069247-75069747	Lcp1	0.898493	2.01518e-175	0.883298	0.973191	1
chr14:75136480-75136980	Lcp1	0.794408	1.88405e-106	0.743037	0.973191	1
chr14:75174694-75175194	Lcp1	0.784871	3.39154e-102	0.680898	0.973191	1
chr14:75175702-75176202	Lcp1	0.699801	5.59432e-72	0.425231	0.973191	1
chr14:75176641-75177141	Lcp1	0.835878	5.8812e-128	0.823012	0.973191	1
chr14:75178478-75178978	Lcp1	0.813407	1.24488e-115	0.658226	0.973191	1
chr14:75179232-75179732	Lcp1	0.922303	1.88465e-202	0.933877	0.973191	1
chr14:75179880-75180380	Lcp1	0.71471	1.83329e-76	0.562038	0.973191	1
chr14:75180493-75180993	Lcp1	0.856115	9.13054e-141	0.89956	0.973191	1
chr14:75181471-75181971	Lcp1	0.670311	6.92798e-64	0.492242	0.973191	1
chr14:75182652-75183152	Lcp1	0.683315	2.46114e-67	0.558602	0.973191	1
chr14:75186085-75186585	Lcp1	0.846401	2.20013e-134	0.859312	0.973191	1
chr14:75186795-75187295	Lcp1	0.696982	3.66209e-71	0.337181	0.973191	1
chr14:75192773-75193273	Lcp1	0.863741	4.05978e-146	0.634015	0.973191	1
chr14:75195385-75195885	Lcp1	0.794174	2.41091e-106	0.826897	0.973191	1
chr14:77795202-77795702	Epsti1	0.567177	8.95145e-42	0.267882	0.689395	1
chr14:77825056-77825556	Epsti1	0.533342	4.07754e-36	0.577272	0.689395	1
chr14:79301345-79301845	Rgcc	0.645303	1.0073e-57	0.997322	0.953069	1
chr14:79301345-79301845	Elf1	0.518479	7.91105e-34	0.997322	0.764269	1
chr14:79985152-79985652	Olfm4	0.762801	3.86043e-93	0.478385	0.949612	1
chr14:80000139-80000639	Olfm4	0.852426	2.73354e-138	0.687739	0.949612	1
chr14:102827980-102828480	Kctd12	0.573669	6.15793e-43	0.715439	0.870714	1
chr14:102835393-102835893	Kctd12	0.587742	1.49727e-45	0.53589	0.870714	1
chr14:102906710-102907210	Kctd12	0.566812	1.03859e-41	0.479241	0.870714	1
chr14:102907465-102907965	Kctd12	0.622139	1.62175e-52	0.333197	0.870714	1
chr14:102982621-102983121	Kctd12	0.585849	3.42455e-45	0.988911	0.870714	1
chr14:103007788-103008288	Kctd12	0.64832	1.95673e-58	0.8986	0.870714	1
chr14:103029231-103029731	Kctd12	0.544404	6.7934e-38	0.570871	0.870714	1
chr14:103033392-103033892	Kctd12	0.586028	3.16813e-45	0.822097	0.870714	1
chr14:103046792-103047292	Kctd12	0.506358	4.78636e-32	0.855369	0.870714	1
chr14:103048150-103048650	Kctd12	0.530538	1.12508e-35	0.500917	0.870714	1
chr14:103048697-103049197	Kctd12	0.542282	1.50786e-37	0.907819	0.870714	1
chr14:103058974-103059474	Kctd12	0.62414	5.99939e-53	0.929261	0.870714	1
chr14:102982621-102983121	Cln5	0.500372	3.42136e-31	0.988911	0.608513	1
chr14:121996750-121997250	Gpr183	0.567595	7.54591e-42	0.48013	0.642351	1
chr14:122009452-122009952	Gpr183	0.57129	1.6552e-42	0.617139	0.642351	1
chr14:122013473-122013973	Gpr183	0.670673	5.59061e-64	0.679108	0.642351	1
chr14:122028924-122029424	Gpr183	0.778365	2.03634e-99	0.619391	0.642351	1
chr14:122029430-122029930	Gpr183	0.730931	1.10701e-81	0.42807	0.642351	1
chr14:122053223-122053723	Gpr183	0.563131	4.61127e-41	0.335014	0.642351	1
chr15:6554671-6555171	Fyb	0.558792	2.60321e-40	0.361678	0.904551	1
chr15:6568936-6569436	Fyb	0.551281	4.92029e-39	0.310521	0.904551	1
chr15:6569603-6570103	Fyb	0.515463	2.23168e-33	0.401428	0.904551	1
chr15:6574495-6574995	Fyb	0.793082	7.5896e-106	0.375706	0.904551	1
chr15:9463409-9463909	Il7r	0.756838	7.33778e-91	0.369139	0.264864	1
chr15:25825717-25826217	Retreg1	0.521399	2.87399e-34	0.643673	0.54866	1
chr15:25827843-25828343	Retreg1	0.530068	1.33242e-35	0.292806	0.54866	1
chr15:25828375-25828875	Retreg1	0.681282	8.77136e-67	0.931912	0.54866	1
chr15:25830620-25831120	Retreg1	0.704741	1.97064e-73	0.57895	0.54866	1
chr15:25831276-25831776	Retreg1	0.649764	8.86357e-59	0.775134	0.54866	1
chr15:25834436-25834936	Retreg1	0.535103	2.14778e-36	0.468291	0.54866	1
chr15:25842937-25843437	Retreg1	0.675224	3.62351e-65	0.951072	0.54866	1
chr15:25843454-25843954	Retreg1	0.607583	1.82968e-49	0.852758	0.54866	1
chr15:25891468-25891968	Retreg1	0.585885	3.37168e-45	0.662245	0.54866	1
chr15:25940460-25940960	Retreg1	0.626658	1.69949e-53	0.887188	0.54866	1
chr15:25971524-25972024	Retreg1	0.591817	2.47718e-46	0.362809	0.54866	1
chr15:59004022-59004522	Mtss1	0.516288	1.68179e-33	0.743028	0.858017	1
chr15:59412603-59413103	Trib1	0.651808	2.86583e-59	0.318636	0.843564	1
chr15:59520456-59520956	Trib1	0.735986	2.18882e-83	0.719405	0.843564	1
chr15:59648405-59648905	Trib1	0.606327	3.30131e-49	0.991822	0.843564	1
chr15:59648918-59649418	Trib1	0.545423	4.62523e-38	0.919181	0.843564	1
chr15:59650450-59650950	Trib1	0.740036	8.83304e-85	0.942585	0.843564	1
chr15:59651211-59651711	Trib1	0.587592	1.59867e-45	0.555852	0.843564	1
chr15:59651732-59652232	Trib1	0.512909	5.32515e-33	0.443278	0.843564	1
chr15:59652687-59653187	Trib1	0.723768	2.49426e-79	0.890633	0.843564	1
chr15:59653316-59653816	Trib1	0.549398	1.01586e-38	0.270331	0.843564	1
chr15:59654337-59654837	Trib1	0.664233	2.47173e-62	0.501532	0.843564	1
chr15:59662546-59663046	Trib1	0.667418	3.84168e-63	0.569301	0.843564	1
chr15:59706970-59707470	Trib1	0.573338	7.072e-43	0.296202	0.843564	1
chr15:59720970-59721470	Trib1	0.660558	2.06291e-61	0.594153	0.843564	1
chr15:59721532-59722032	Trib1	0.790513	1.09654e-104	0.791162	0.843564	1
chr15:59728072-59728572	Trib1	0.518357	8.25142e-34	0.98421	0.843564	1
chr15:59728737-59729237	Trib1	0.581736	2.02565e-44	0.783643	0.843564	1
chr15:59739146-59739646	Trib1	0.792323	1.67791e-105	0.60984	0.843564	1
chr15:59773995-59774495	Trib1	0.704367	2.54276e-73	0.364442	0.843564	1
chr15:59783825-59784325	Trib1	0.660994	1.60658e-61	0.951498	0.843564	1
chr15:59785856-59786356	Trib1	0.772641	4.74404e-97	0.808774	0.843564	1
chr15:59795614-59796114	Trib1	0.784631	4.31211e-102	0.778372	0.843564	1
chr15:59807674-59808174	Trib1	0.780492	2.5708e-100	0.854508	0.843564	1
chr15:64040633-64041133	Fam49b	0.558294	3.17199e-40	0.663281	0.975854	1
chr15:64041192-64041692	Fam49b	0.5889	9.00796e-46	0.579349	0.975854	1
chr15:64059034-64059534	Fam49b	0.649424	1.06909e-58	0.76535	0.975854	1
chr15:64059644-64060144	Fam49b	0.525517	6.75158e-35	0.780135	0.975854	1
chr15:64075503-64076003	Fam49b	0.621314	2.43958e-52	0.814318	0.975854	1
chr15:64100390-64100890	Fam49b	0.526362	5.0048e-35	0.550648	0.975854	1
chr15:66729410-66729910	Sla	0.592787	1.60689e-46	0.477285	0.685314	1
chr15:66812223-66812723	Sla	0.548429	1.47301e-38	0.665412	0.685314	1
chr15:66813885-66814385	Sla	0.687796	1.44377e-68	0.524706	0.685314	1
chr15:66816407-66816907	Sla	0.788127	1.26936e-103	0.643225	0.685314	1
chr15:67048514-67049014	Sla	0.831075	3.5884e-125	0.715215	0.685314	1
chr15:74930633-74931133	Ly6c2	0.837347	7.95634e-129	0.600702	0.966389	1
chr15:74931621-74932121	Ly6c2	0.895185	3.3214e-172	0.717857	0.966389	1
chr15:74962408-74962908	Ly6c2	0.713612	4.00886e-76	0.339783	0.966389	1
chr15:74988523-74989023	Ly6c2	0.634839	2.57501e-55	0.912264	0.966389	1
chr15:74989043-74989543	Ly6c2	0.782766	2.75363e-101	0.770598	0.966389	1
chr15:74930633-74931133	Ly6g	0.682508	4.08452e-67	0.600702	0.693363	1
chr15:74931621-74932121	Ly6g	0.84168	1.93293e-131	0.717857	0.693363	1
chr15:74962408-74962908	Ly6g	0.619327	6.48574e-52	0.339783	0.693363	1
chr15:74988523-74989023	Ly6g	0.570279	2.51258e-42	0.912264	0.693363	1
chr15:74989043-74989543	Ly6g	0.735116	4.32718e-83	0.770598	0.693363	1
chr15:75857058-75857558	Gsdmd	0.570137	2.66314e-42	0.947281	0.743014	1
chr15:75875734-75876234	Gsdmd	0.667026	4.83927e-63	0.565147	0.743014	1
chr15:76204091-76204591	Parp10	0.569566	3.36844e-42	0.964104	0.457575	1
chr15:76203444-76203944	Grina	0.605265	5.42456e-49	0.618023	0.885337	1
chr15:76204091-76204591	Grina	0.815658	8.62812e-117	0.964104	0.885337	1
chr15:76267878-76268378	Grina	0.668864	1.6345e-63	0.315828	0.885337	1
chr15:76268962-76269462	Grina	0.652852	1.60383e-59	0.71395	0.885337	1
chr15:76269595-76270095	Grina	0.666213	7.79882e-63	0.803543	0.885337	1
chr15:76270484-76270984	Grina	0.736207	1.83867e-83	0.584472	0.885337	1
chr15:76273667-76274167	Grina	0.754342	6.30795e-90	0.812196	0.885337	1
chr15:76274613-76275113	Grina	0.660656	1.95096e-61	0.690735	0.885337	1
chr15:76281121-76281621	Grina	0.674747	4.83989e-65	0.328985	0.885337	1
chr15:76287575-76288075	Grina	0.686523	3.24855e-68	0.749658	0.885337	1
chr15:76299414-76299914	Grina	0.609895	6.13806e-50	0.405816	0.885337	1
chr15:76232850-76233350	Mroh1	0.504143	9.95628e-32	0.930199	0.383665	1
chr15:76267878-76268378	Dgat1	0.7153	1.20313e-76	0.315828	0.737516	1
chr15:76268962-76269462	Dgat1	0.736594	1.35606e-83	0.71395	0.737516	1
chr15:76269595-76270095	Dgat1	0.761888	8.70534e-93	0.803543	0.737516	1
chr15:76270484-76270984	Dgat1	0.813436	1.20317e-115	0.584472	0.737516	1
chr15:76273667-76274167	Dgat1	0.81099	2.09292e-114	0.812196	0.737516	1
chr15:76274613-76275113	Dgat1	0.75922	9.18038e-92	0.690735	0.737516	1
chr15:76281121-76281621	Dgat1	0.735607	2.9461e-83	0.328985	0.737516	1
chr15:76287575-76288075	Dgat1	0.746144	6.2089e-87	0.749658	0.737516	1
chr15:76293928-76294428	Dgat1	0.511712	7.98224e-33	0.83996	0.737516	1
chr15:76299414-76299914	Dgat1	0.574364	4.60897e-43	0.405816	0.737516	1
chr15:76507190-76507690	Dgat1	0.623002	1.05717e-52	0.525424	0.737516	1
chr15:78242526-78243026	Ncf4	0.524627	9.24518e-35	0.479295	0.945984	1
chr15:78244578-78245078	Ncf4	0.937455	1.34281e-224	0.967544	0.945984	1
chr15:78245233-78245733	Ncf4	0.87338	2.28943e-153	0.795069	0.945984	1
chr15:78246126-78246626	Ncf4	0.846511	1.87418e-134	0.858962	0.945984	1
chr15:78246823-78247323	Ncf4	0.770084	5.1464e-96	0.71107	0.945984	1
chr15:78247684-78248184	Ncf4	0.907481	9.02987e-185	0.953342	0.945984	1
chr15:78248330-78248830	Ncf4	0.922127	3.18813e-202	0.866575	0.945984	1
chr15:78257387-78257887	Ncf4	0.659757	3.2662e-61	0.907078	0.945984	1
chr15:78258152-78258652	Ncf4	0.934103	2.9804e-219	0.981827	0.945984	1
chr15:78267774-78268274	Ncf4	0.647462	3.12231e-58	0.566327	0.945984	1
chr15:78305436-78305936	Ncf4	0.737179	8.55581e-84	0.550186	0.945984	1
chr15:78325797-78326297	Ncf4	0.725864	5.22427e-80	0.717193	0.945984	1
chr15:78242526-78243026	Csf2rb	0.545146	5.13724e-38	0.479295	0.691039	1
chr15:78244578-78245078	Csf2rb	0.944662	3.55186e-237	0.967544	0.691039	1
chr15:78245233-78245733	Csf2rb	0.867058	1.50123e-148	0.795069	0.691039	1
chr15:78246126-78246626	Csf2rb	0.879292	4.09111e-158	0.858962	0.691039	1
chr15:78246823-78247323	Csf2rb	0.771857	9.89749e-97	0.71107	0.691039	1
chr15:78247684-78248184	Csf2rb	0.925931	2.5433e-207	0.953342	0.691039	1
chr15:78248330-78248830	Csf2rb	0.925208	2.50811e-206	0.866575	0.691039	1
chr15:78257387-78257887	Csf2rb	0.660175	2.57216e-61	0.907078	0.691039	1
chr15:78258152-78258652	Csf2rb	0.950868	2.17227e-249	0.981827	0.691039	1
chr15:78267774-78268274	Csf2rb	0.693666	3.25465e-70	0.566327	0.691039	1
chr15:78305436-78305936	Csf2rb	0.727163	1.9594e-80	0.550186	0.691039	1
chr15:78325797-78326297	Csf2rb	0.739434	1.42925e-84	0.717193	0.691039	1
chr15:78563921-78564421	Csf2rb	0.854254	1.65405e-139	0.655933	0.691039	1
chr15:78571570-78572070	Csf2rb	0.828232	1.45522e-123	0.888125	0.691039	1
chr15:78572565-78573065	Csf2rb	0.928179	1.83838e-210	0.963135	0.691039	1
chr15:78305436-78305936	Il2rb	0.52351	1.37095e-34	0.550186	0.4336	1
chr15:78325797-78326297	Il2rb	0.552363	3.23541e-39	0.717193	0.4336	1
chr15:78325797-78326297	Rac2	0.803168	1.46669e-110	0.717193	0.983053	1
chr15:78563921-78564421	Rac2	0.794925	1.09341e-106	0.655933	0.983053	1
chr15:78571570-78572070	Rac2	0.824528	1.63759e-121	0.888125	0.983053	1
chr15:78572565-78573065	Rac2	0.927585	1.26501e-209	0.963135	0.983053	1
chr15:78588881-78589381	Rac2	0.913319	2.30605e-191	0.787865	0.983053	1
chr15:78591775-78592275	Rac2	0.855392	2.82692e-140	0.948147	0.983053	1
chr15:78596830-78597330	Rac2	0.87526	7.51057e-155	0.883505	0.983053	1
chr15:78597779-78598279	Rac2	0.727493	1.52551e-80	0.681508	0.983053	1
chr15:78599064-78599564	Rac2	0.874312	4.26684e-154	0.828413	0.983053	1
chr15:78607439-78607939	Rac2	0.914018	3.50405e-192	0.926292	0.983053	1
chr15:78809642-78810142	Rac2	0.763245	2.59574e-93	0.331739	0.983053	1
chr15:78815266-78815766	Rac2	0.676272	1.91701e-65	0.787936	0.983053	1
chr15:78815957-78816457	Rac2	0.59082	3.85747e-46	0.603834	0.983053	1
chr15:78563921-78564421	Cyth4	0.65653	2.04039e-60	0.655933	0.842771	1
chr15:78571570-78572070	Cyth4	0.729773	2.69249e-81	0.888125	0.842771	1
chr15:78572565-78573065	Cyth4	0.847136	7.51071e-135	0.963135	0.842771	1
chr15:78588881-78589381	Cyth4	0.864099	2.23606e-146	0.787865	0.842771	1
chr15:78591775-78592275	Cyth4	0.72804	1.00769e-80	0.948147	0.842771	1
chr15:78596830-78597330	Cyth4	0.846462	2.01086e-134	0.883505	0.842771	1
chr15:78597779-78598279	Cyth4	0.766946	9.16429e-95	0.681508	0.842771	1
chr15:78599064-78599564	Cyth4	0.741	4.07676e-85	0.828413	0.842771	1
chr15:78607439-78607939	Cyth4	0.876901	3.64122e-156	0.926292	0.842771	1
chr15:78809642-78810142	Cyth4	0.691776	1.11726e-69	0.331739	0.842771	1
chr15:78815266-78815766	Cyth4	0.663265	4.33626e-62	0.787936	0.842771	1
chr15:78815957-78816457	Cyth4	0.516323	1.66166e-33	0.603834	0.842771	1
chr15:78771597-78772097	Mfng	0.852927	1.27037e-138	0.656131	0.656861	1
chr15:78772331-78772831	Mfng	0.755352	2.65221e-90	0.638918	0.656861	1
chr15:78809642-78810142	Sh3bp1	0.568913	4.40151e-42	0.331739	0.672221	1
chr15:78879085-78879585	Sh3bp1	0.672774	1.59064e-64	0.898739	0.672221	1
chr15:80634932-80635432	Grap2	0.535528	1.83842e-36	0.290536	0.293828	1
chr15:83003123-83003623	Gm20324	0.52485	8.54594e-35	0.582292	0.261407	1
chr15:83009452-83009952	Gm20324	0.526753	4.35465e-35	0.905589	0.261407	1
chr15:83003123-83003623	Nfam1	0.581125	2.63343e-44	0.582292	0.727597	1
chr15:83009452-83009952	Nfam1	0.856473	5.21943e-141	0.905589	0.727597	1
chr15:83030256-83030756	Nfam1	0.511756	7.86518e-33	0.513617	0.727597	1
chr15:83033024-83033524	Nfam1	0.514946	2.66212e-33	0.828126	0.727597	1
chr15:83036033-83036533	Nfam1	0.528925	2.00538e-35	0.735231	0.727597	1
chr15:83407982-83408482	Tspo	0.564989	2.17751e-41	0.521813	0.970073	1
chr15:84235635-84236135	Parvb	0.725434	7.20611e-80	0.85231	0.394604	1
chr15:84324491-84324991	Parvb	0.542068	1.63245e-37	0.618099	0.394604	1
chr15:84325778-84326278	Parvb	0.56185	7.71265e-41	0.681431	0.394604	1
chr15:84235635-84236135	Parvg	0.821768	5.16077e-120	0.85231	0.623987	1
chr15:84324491-84324991	Parvg	0.809493	1.17613e-113	0.618099	0.623987	1
chr15:90963289-90963789	Abcd2	0.861906	8.44807e-145	0.684078	0.465454	1
chr15:91632957-91633457	Lrrk2	0.603517	1.22305e-48	0.327976	0.37709	1
chr15:91641684-91642184	Lrrk2	0.768078	3.26777e-95	0.250714	0.37709	1
chr15:91643665-91644165	Lrrk2	0.736496	1.46527e-83	0.771033	0.37709	1
chr15:96475413-96475913	Slc38a1	0.603352	1.31977e-48	0.475383	0.764382	1
chr15:96638187-96638687	Slc38a1	0.669424	1.17397e-63	0.855607	0.764382	1
chr15:96654675-96655175	Slc38a1	0.626616	1.73567e-53	0.623926	0.764382	1
chr15:96655425-96655925	Slc38a1	0.64808	2.22965e-58	0.520624	0.764382	1
chr15:96736639-96737139	Slc38a1	0.559615	1.8804e-40	0.277163	0.764382	1
chr15:96743316-96743816	Slc38a1	0.665622	1.10069e-62	0.732167	0.764382	1
chr15:96757384-96757884	Slc38a1	0.687286	1.99954e-68	0.714991	0.764382	1
chr15:97816638-97817138	Slc48a1	0.544231	7.25098e-38	0.308592	0.867086	1
chr15:99029502-99030002	Dhh	0.547903	1.80167e-38	0.978127	0.986737	1
chr15:99029502-99030002	Tuba1c	0.659851	3.09556e-61	0.978127	0.940316	1
chr15:99030014-99030514	Tuba1c	0.659986	2.86548e-61	0.998318	0.940316	1
chr15:100669306-100669806	Dazap2	0.545373	4.71355e-38	0.674474	0.890835	1
chr15:100669306-100669806	Smagp	0.789759	2.38645e-104	0.674474	0.921555	1
chr15:100460906-100461406	Bin2	0.54734	2.2344e-38	0.625155	0.84141	1
chr15:100461643-100462143	Bin2	0.629369	4.30047e-54	0.690942	0.84141	1
chr15:100664795-100665295	Bin2	0.655981	2.78305e-60	0.482198	0.84141	1
chr15:100669306-100669806	Bin2	0.877734	7.69708e-157	0.674474	0.84141	1
chr15:100728592-100729092	Bin2	0.516364	1.63822e-33	0.565506	0.84141	1
chr15:100737658-100738158	Bin2	0.513285	4.68858e-33	0.365456	0.84141	1
chr15:100461643-100462143	Cela1	0.512143	6.90017e-33	0.690942	0.790172	1
chr15:100669306-100669806	Galnt6	0.859493	4.27711e-143	0.674474	0.318653	1
chr15:101244084-101244584	Krt83	0.590626	4.20431e-46	0.691296	0.399082	1
chr15:101256000-101256500	Krt83	0.680631	1.31208e-66	0.835012	0.399082	1
chr15:101256793-101257293	Krt83	0.825331	5.94401e-122	0.90789	0.399082	1
chr15:101262387-101262887	Krt83	0.597786	1.69855e-47	0.894226	0.399082	1
chr15:101371633-101372133	Krt83	0.915802	2.63136e-194	0.772882	0.399082	1
chr15:101373082-101373582	Krt83	0.929435	2.8802e-212	0.859056	0.399082	1
chr15:101374842-101375342	Krt83	0.785658	1.54611e-102	0.900475	0.399082	1
chr15:101388077-101388577	Krt83	0.500741	3.03553e-31	0.796244	0.399082	1
chr15:102243352-102243852	Itgb7	0.619948	4.77844e-52	0.814255	0.291277	1
chr15:102243352-102243852	Prr13	0.59718	2.23709e-47	0.814255	0.919855	1
chr15:103257673-103258173	Nfe2	0.779899	4.58958e-100	0.571966	0.58091	1
chr15:103258254-103258754	Nfe2	0.86078	5.33957e-144	0.96117	0.58091	1
chr15:103361239-103361739	Nfe2	0.75342	1.38896e-89	0.657548	0.58091	1
chr15:103370358-103370858	Nfe2	0.768171	3.00244e-95	0.928997	0.58091	1
chr15:103453517-103454017	Nfe2	0.785418	1.96277e-102	0.786694	0.58091	1
chr15:103257673-103258173	Gpr84	0.668033	2.67274e-63	0.571966	0.271269	1
chr15:103258254-103258754	Gpr84	0.793671	4.09241e-106	0.96117	0.271269	1
chr15:103333605-103334105	Gpr84	0.602187	2.2639e-48	0.754947	0.271269	1
chr15:103361239-103361739	Gpr84	0.705503	1.16699e-73	0.657548	0.271269	1
chr15:103370358-103370858	Gpr84	0.899174	4.2499e-176	0.928997	0.271269	1
chr15:103453517-103454017	Gpr84	0.92072	2.10846e-200	0.786694	0.271269	1
chr15:103258254-103258754	Nckap1l	0.570264	2.52777e-42	0.96117	0.521623	1
chr15:103333093-103333593	Nckap1l	0.611162	3.3608e-50	0.709302	0.521623	1
chr15:103333605-103334105	Nckap1l	0.809213	1.62204e-113	0.754947	0.521623	1
chr15:103370358-103370858	Nckap1l	0.777719	3.79849e-99	0.928997	0.521623	1
chr15:103453517-103454017	Nckap1l	0.841296	3.3246e-131	0.786694	0.521623	1
chr16:3699250-3699750	Naa60	0.552023	3.69178e-39	0.805746	0.566004	1
chr16:3723168-3723668	Naa60	0.662589	6.41271e-62	0.791009	0.566004	1
chr16:3895339-3895839	Naa60	0.635135	2.2063e-55	0.563676	0.566004	1
chr16:4912915-4913415	Coro7	0.587735	1.50179e-45	0.851664	0.398572	1
chr16:4969378-4969878	Rogdi	0.54673	2.81774e-38	0.760168	0.774188	1
chr16:5011615-5012115	Rogdi	0.550945	5.60155e-39	0.696361	0.774188	1
chr16:5203212-5203712	Rogdi	0.50701	3.85621e-32	0.799299	0.774188	1
chr16:16907693-16908193	Ppm1f	0.621197	2.58406e-52	0.609944	0.428158	1
chr16:22629873-22630373	Dgkg	0.776769	9.45018e-99	0.492197	0.510627	1
chr16:22654431-22654931	Dgkg	0.789822	2.23647e-104	0.535159	0.510627	1
chr16:22654943-22655443	Dgkg	0.617149	1.88045e-51	0.252921	0.510627	1
chr16:22655689-22656189	Dgkg	0.63767	5.86585e-56	0.589165	0.510627	1
chr16:22656284-22656784	Dgkg	0.675743	2.64453e-65	0.764717	0.510627	1
chr16:22656906-22657406	Dgkg	0.716374	5.55977e-77	0.936955	0.510627	1
chr16:22658073-22658573	Dgkg	0.698891	1.02864e-71	0.747249	0.510627	1
chr16:23609698-23610198	Rtp4	0.514402	3.20625e-33	0.76474	0.805249	1
chr16:24076422-24076922	Bcl6	0.65655	2.01786e-60	0.778413	0.350734	1
chr16:24089388-24089888	Bcl6	0.652502	1.94851e-59	0.505538	0.350734	1
chr16:24089915-24090415	Bcl6	0.72072	2.36381e-78	0.837564	0.350734	1
chr16:24193213-24193713	Bcl6	0.630194	2.82029e-54	0.896012	0.350734	1
chr16:24199284-24199784	Bcl6	0.637473	6.50633e-56	0.650667	0.350734	1
chr16:24199793-24200293	Bcl6	0.679275	3.03622e-66	0.876	0.350734	1
chr16:24202560-24203060	Bcl6	0.682445	4.24855e-67	0.62974	0.350734	1
chr16:24215234-24215734	Bcl6	0.608231	1.3485e-49	0.618655	0.350734	1
chr16:24238289-24238789	Bcl6	0.618517	9.6424e-52	0.711043	0.350734	1
chr16:32102183-32102683	Nrros	0.560752	1.19584e-40	0.835025	0.729694	1
chr16:32113524-32114024	Nrros	0.853731	3.71392e-139	0.932388	0.729694	1
chr16:32163307-32163807	Nrros	0.793359	5.68315e-106	0.482067	0.729694	1
chr16:32165319-32165819	Nrros	0.742948	8.47339e-86	0.841175	0.729694	1
chr16:32170599-32171099	Nrros	0.813527	1.08114e-115	0.514685	0.729694	1
chr16:32171234-32171734	Nrros	0.841963	1.29629e-131	0.482655	0.729694	1
chr16:32176862-32177362	Nrros	0.654427	6.64665e-60	0.677843	0.729694	1
chr16:32190079-32190579	Nrros	0.716055	6.99224e-77	0.71172	0.729694	1
chr16:32202632-32203132	Nrros	0.766587	1.26968e-94	0.800008	0.729694	1
chr16:32400324-32400824	Nrros	0.616607	2.44752e-51	0.769069	0.729694	1
chr16:32401580-32402080	Nrros	0.78753	2.33293e-103	0.598809	0.729694	1
chr16:32190079-32190579	Tctex1d2	0.537628	8.49184e-37	0.71172	0.852576	1
chr16:36183317-36183817	Parp9	0.503334	1.29896e-31	0.512881	0.431333	1
chr16:36156646-36157146	Stfa2l1	0.835365	1.17544e-127	0.518673	0.981239	1
chr16:36157329-36157829	Stfa2l1	0.76648	1.39902e-94	0.344601	0.981239	1
chr16:36183317-36183817	Stfa2l1	0.847684	3.35152e-135	0.512881	0.981239	1
chr16:36185467-36185967	Stfa2l1	0.852984	1.16605e-138	0.548567	0.981239	1
chr16:36191668-36192168	Stfa2l1	0.886231	5.24268e-164	0.419498	0.981239	1
chr16:36196593-36197093	Stfa2l1	0.908251	1.30636e-185	0.762178	0.981239	1
chr16:36198254-36198754	Stfa2l1	0.73552	3.15511e-83	0.567502	0.981239	1
chr16:36209049-36209549	Stfa2l1	0.668937	1.56697e-63	0.476137	0.981239	1
chr16:36209900-36210400	Stfa2l1	0.826783	9.38078e-123	0.399975	0.981239	1
chr16:36212265-36212765	Stfa2l1	0.792352	1.62685e-105	0.51595	0.981239	1
chr16:36276663-36277163	Stfa2l1	0.860589	7.28222e-144	0.355542	0.981239	1
chr16:36289100-36289600	Stfa2l1	0.845971	4.11613e-134	0.675304	0.981239	1
chr16:36307576-36308076	Stfa2l1	0.881886	2.82628e-160	0.318914	0.981239	1
chr16:36355452-36355952	Stfa2l1	0.87306	4.07721e-153	0.588115	0.981239	1
chr16:36367491-36367991	Stfa2l1	0.890043	2.08254e-167	0.298534	0.981239	1
chr16:36156646-36157146	Gm5483	0.815333	1.27265e-116	0.518673	0.990875	1
chr16:36157329-36157829	Gm5483	0.745266	1.27891e-86	0.344601	0.990875	1
chr16:36183317-36183817	Gm5483	0.833248	2.01379e-126	0.512881	0.990875	1
chr16:36185467-36185967	Gm5483	0.834805	2.4973e-127	0.548567	0.990875	1
chr16:36191668-36192168	Gm5483	0.885959	9.0646e-164	0.419498	0.990875	1
chr16:36196593-36197093	Gm5483	0.89054	7.33835e-168	0.762178	0.990875	1
chr16:36198254-36198754	Gm5483	0.722989	4.4486e-79	0.567502	0.990875	1
chr16:36209049-36209549	Gm5483	0.650545	5.7617e-59	0.476137	0.990875	1
chr16:36209900-36210400	Gm5483	0.811674	9.44286e-115	0.399975	0.990875	1
chr16:36212265-36212765	Gm5483	0.774281	1.00971e-97	0.51595	0.990875	1
chr16:36276663-36277163	Gm5483	0.840984	5.1484e-131	0.355542	0.990875	1
chr16:36289100-36289600	Gm5483	0.826508	1.33192e-122	0.675304	0.990875	1
chr16:36307576-36308076	Gm5483	0.867053	1.51359e-148	0.318914	0.990875	1
chr16:36355452-36355952	Gm5483	0.856128	8.96072e-141	0.588115	0.990875	1
chr16:36367491-36367991	Gm5483	0.882112	1.82324e-160	0.298534	0.990875	1
chr16:36408199-36408699	Gm5483	0.806797	2.52621e-112	0.365003	0.990875	1
chr16:36417008-36417508	Gm5483	0.832488	5.53394e-126	0.65474	0.990875	1
chr16:36420839-36421339	Gm5483	0.846547	1.77866e-134	0.616946	0.990875	1
chr16:36156646-36157146	Gm5416	0.886566	2.64882e-164	0.518673	0.803605	1
chr16:36157329-36157829	Gm5416	0.816796	2.20952e-117	0.344601	0.803605	1
chr16:36183317-36183817	Gm5416	0.868988	5.42643e-150	0.512881	0.803605	1
chr16:36185467-36185967	Gm5416	0.886046	7.60014e-164	0.548567	0.803605	1
chr16:36191668-36192168	Gm5416	0.85563	1.94777e-140	0.419498	0.803605	1
chr16:36196593-36197093	Gm5416	0.931618	1.81626e-215	0.762178	0.803605	1
chr16:36198254-36198754	Gm5416	0.738476	3.06171e-84	0.567502	0.803605	1
chr16:36209049-36209549	Gm5416	0.711095	2.37934e-75	0.476137	0.803605	1
chr16:36209900-36210400	Gm5416	0.838432	1.7914e-129	0.399975	0.803605	1
chr16:36212265-36212765	Gm5416	0.821662	5.87195e-120	0.51595	0.803605	1
chr16:36276663-36277163	Gm5416	0.896752	1.03094e-173	0.355542	0.803605	1
chr16:36289100-36289600	Gm5416	0.896029	5.13667e-173	0.675304	0.803605	1
chr16:36307576-36308076	Gm5416	0.890191	1.52774e-167	0.318914	0.803605	1
chr16:36355452-36355952	Gm5416	0.890499	8.00447e-168	0.588115	0.803605	1
chr16:36367491-36367991	Gm5416	0.900906	7.77537e-178	0.298534	0.803605	1
chr16:36408199-36408699	Gm5416	0.868427	1.43426e-149	0.365003	0.803605	1
chr16:36417008-36417508	Gm5416	0.868977	5.52593e-150	0.65474	0.803605	1
chr16:36420839-36421339	Gm5416	0.879419	3.22908e-158	0.616946	0.803605	1
chr16:36455362-36455862	Gm5416	0.87232	1.53861e-152	0.448952	0.803605	1
chr16:36156646-36157146	2010005H15Rik	0.845404	9.34379e-134	0.518673	0.903361	1
chr16:36157329-36157829	2010005H15Rik	0.77262	4.83597e-97	0.344601	0.903361	1
chr16:36183317-36183817	2010005H15Rik	0.834826	2.42918e-127	0.512881	0.903361	1
chr16:36185467-36185967	2010005H15Rik	0.841928	1.36119e-131	0.548567	0.903361	1
chr16:36191668-36192168	2010005H15Rik	0.837793	4.31309e-129	0.419498	0.903361	1
chr16:36196593-36197093	2010005H15Rik	0.899503	1.99571e-176	0.762178	0.903361	1
chr16:36198254-36198754	2010005H15Rik	0.70698	4.21305e-74	0.567502	0.903361	1
chr16:36209049-36209549	2010005H15Rik	0.728894	5.25906e-81	0.476137	0.903361	1
chr16:36209900-36210400	2010005H15Rik	0.806145	5.27029e-112	0.399975	0.903361	1
chr16:36212265-36212765	2010005H15Rik	0.779508	6.7162e-100	0.51595	0.903361	1
chr16:36276663-36277163	2010005H15Rik	0.856706	3.62066e-141	0.355542	0.903361	1
chr16:36289100-36289600	2010005H15Rik	0.857823	6.16447e-142	0.675304	0.903361	1
chr16:36307576-36308076	2010005H15Rik	0.858988	9.61867e-143	0.318914	0.903361	1
chr16:36355452-36355952	2010005H15Rik	0.857024	2.18974e-141	0.588115	0.903361	1
chr16:36367491-36367991	2010005H15Rik	0.881216	1.04023e-159	0.298534	0.903361	1
chr16:36408199-36408699	2010005H15Rik	0.83602	4.85315e-128	0.365003	0.903361	1
chr16:36417008-36417508	2010005H15Rik	0.828142	1.63457e-123	0.65474	0.903361	1
chr16:36420839-36421339	2010005H15Rik	0.844721	2.51252e-133	0.616946	0.903361	1
chr16:36455362-36455862	2010005H15Rik	0.833107	2.42575e-126	0.448952	0.903361	1
chr16:36465293-36465793	2010005H15Rik	0.808847	2.46529e-113	0.681108	0.903361	1
chr16:36156646-36157146	Stfa1	0.805305	1.35764e-111	0.518673	0.994899	1
chr16:36157329-36157829	Stfa1	0.737293	7.81729e-84	0.344601	0.994899	1
chr16:36183317-36183817	Stfa1	0.827932	2.13755e-123	0.512881	0.994899	1
chr16:36185467-36185967	Stfa1	0.831617	1.75696e-125	0.548567	0.994899	1
chr16:36191668-36192168	Stfa1	0.890844	3.86815e-168	0.419498	0.994899	1
chr16:36196593-36197093	Stfa1	0.888618	4.02933e-166	0.762178	0.994899	1
chr16:36198254-36198754	Stfa1	0.730971	1.07413e-81	0.567502	0.994899	1
chr16:36209049-36209549	Stfa1	0.642166	5.42798e-57	0.476137	0.994899	1
chr16:36209900-36210400	Stfa1	0.810782	2.66136e-114	0.399975	0.994899	1
chr16:36212265-36212765	Stfa1	0.773203	2.79773e-97	0.51595	0.994899	1
chr16:36276663-36277163	Stfa1	0.841063	4.60933e-131	0.355542	0.994899	1
chr16:36289100-36289600	Stfa1	0.815817	7.14712e-117	0.675304	0.994899	1
chr16:36307576-36308076	Stfa1	0.875755	3.04386e-155	0.318914	0.994899	1
chr16:36355452-36355952	Stfa1	0.856479	5.17395e-141	0.588115	0.994899	1
chr16:36367491-36367991	Stfa1	0.874308	4.29074e-154	0.298534	0.994899	1
chr16:36408199-36408699	Stfa1	0.801494	9.26784e-110	0.365003	0.994899	1
chr16:36417008-36417508	Stfa1	0.836742	1.81451e-128	0.65474	0.994899	1
chr16:36420839-36421339	Stfa1	0.852979	1.17507e-138	0.616946	0.994899	1
chr16:36455362-36455862	Stfa1	0.810067	6.07772e-114	0.448952	0.994899	1
chr16:36465293-36465793	Stfa1	0.824616	1.46592e-121	0.681108	0.994899	1
chr16:36476797-36477297	Stfa1	0.806728	2.7319e-112	0.669907	0.994899	1
chr16:36156646-36157146	BC117090	0.916312	6.39652e-195	0.518673	0.772204	1
chr16:36157329-36157829	BC117090	0.852749	1.67119e-138	0.344601	0.772204	1
chr16:36183317-36183817	BC117090	0.899875	8.48309e-177	0.512881	0.772204	1
chr16:36185467-36185967	BC117090	0.928419	8.36714e-211	0.548567	0.772204	1
chr16:36191668-36192168	BC117090	0.877322	1.66227e-156	0.419498	0.772204	1
chr16:36196593-36197093	BC117090	0.958823	1.29193e-267	0.762178	0.772204	1
chr16:36198254-36198754	BC117090	0.773428	2.26396e-97	0.567502	0.772204	1
chr16:36209049-36209549	BC117090	0.733086	2.1042e-82	0.476137	0.772204	1
chr16:36209900-36210400	BC117090	0.870327	5.26049e-151	0.399975	0.772204	1
chr16:36212265-36212765	BC117090	0.860729	5.79938e-144	0.51595	0.772204	1
chr16:36276663-36277163	BC117090	0.934139	2.63492e-219	0.355542	0.772204	1
chr16:36289100-36289600	BC117090	0.921444	2.48289e-201	0.675304	0.772204	1
chr16:36307576-36308076	BC117090	0.92639	5.8449e-208	0.318914	0.772204	1
chr16:36355452-36355952	BC117090	0.920595	3.0376e-200	0.588115	0.772204	1
chr16:36367491-36367991	BC117090	0.909224	1.08116e-186	0.298534	0.772204	1
chr16:36408199-36408699	BC117090	0.89374	7.87789e-171	0.365003	0.772204	1
chr16:36417008-36417508	BC117090	0.913363	2.04935e-191	0.65474	0.772204	1
chr16:36420839-36421339	BC117090	0.91689	1.27393e-195	0.616946	0.772204	1
chr16:36455362-36455862	BC117090	0.90265	1.25512e-179	0.448952	0.772204	1
chr16:36465293-36465793	BC117090	0.893624	1.01149e-170	0.681108	0.772204	1
chr16:36476797-36477297	BC117090	0.83941	4.62191e-130	0.669907	0.772204	1
chr16:36156646-36157146	BC100530	0.819416	9.29287e-119	0.518673	0.990988	1
chr16:36157329-36157829	BC100530	0.749191	4.93273e-88	0.344601	0.990988	1
chr16:36183317-36183817	BC100530	0.835389	1.13781e-127	0.512881	0.990988	1
chr16:36185467-36185967	BC100530	0.837214	9.54164e-129	0.548567	0.990988	1
chr16:36191668-36192168	BC100530	0.882577	7.4094e-161	0.419498	0.990988	1
chr16:36196593-36197093	BC100530	0.89274	6.80323e-170	0.762178	0.990988	1
chr16:36198254-36198754	BC100530	0.722614	5.86253e-79	0.567502	0.990988	1
chr16:36209049-36209549	BC100530	0.65521	4.2892e-60	0.476137	0.990988	1
chr16:36209900-36210400	BC100530	0.81376	8.21138e-116	0.399975	0.990988	1
chr16:36212265-36212765	BC100530	0.777499	4.69052e-99	0.51595	0.990988	1
chr16:36276663-36277163	BC100530	0.842542	5.70524e-132	0.355542	0.990988	1
chr16:36289100-36289600	BC100530	0.830185	1.15214e-124	0.675304	0.990988	1
chr16:36307576-36308076	BC100530	0.865935	1.01577e-147	0.318914	0.990988	1
chr16:36355452-36355952	BC100530	0.857779	6.61767e-142	0.588115	0.990988	1
chr16:36367491-36367991	BC100530	0.885524	2.15489e-163	0.298534	0.990988	1
chr16:36408199-36408699	BC100530	0.809619	1.01849e-113	0.365003	0.990988	1
chr16:36417008-36417508	BC100530	0.832199	8.11336e-126	0.65474	0.990988	1
chr16:36420839-36421339	BC100530	0.846619	1.60199e-134	0.616946	0.990988	1
chr16:36455362-36455862	BC100530	0.821819	4.84478e-120	0.448952	0.990988	1
chr16:36465293-36465793	BC100530	0.820098	4.04734e-119	0.681108	0.990988	1
chr16:36476797-36477297	BC100530	0.795513	5.86099e-107	0.669907	0.990988	1
chr16:36183317-36183817	Stfa2	0.848369	1.21957e-135	0.512881	0.966559	1
chr16:36185467-36185967	Stfa2	0.852284	3.38344e-138	0.548567	0.966559	1
chr16:36191668-36192168	Stfa2	0.869463	2.37216e-150	0.419498	0.966559	1
chr16:36196593-36197093	Stfa2	0.90687	4.15534e-184	0.762178	0.966559	1
chr16:36198254-36198754	Stfa2	0.725092	9.3105e-80	0.567502	0.966559	1
chr16:36209049-36209549	Stfa2	0.676525	1.64229e-65	0.476137	0.966559	1
chr16:36209900-36210400	Stfa2	0.82299	1.13122e-120	0.399975	0.966559	1
chr16:36212265-36212765	Stfa2	0.791424	4.28045e-105	0.51595	0.966559	1
chr16:36276663-36277163	Stfa2	0.860066	1.69578e-143	0.355542	0.966559	1
chr16:36289100-36289600	Stfa2	0.855913	1.25263e-140	0.675304	0.966559	1
chr16:36307576-36308076	Stfa2	0.870248	6.04447e-151	0.318914	0.966559	1
chr16:36355452-36355952	Stfa2	0.870357	4.99088e-151	0.588115	0.966559	1
chr16:36367491-36367991	Stfa2	0.893988	4.59518e-171	0.298534	0.966559	1
chr16:36408199-36408699	Stfa2	0.82979	1.93187e-124	0.365003	0.966559	1
chr16:36417008-36417508	Stfa2	0.840167	1.61645e-130	0.65474	0.966559	1
chr16:36420839-36421339	Stfa2	0.85522	3.69453e-140	0.616946	0.966559	1
chr16:36455362-36455862	Stfa2	0.839814	2.63883e-130	0.448952	0.966559	1
chr16:36465293-36465793	Stfa2	0.826087	2.27911e-122	0.681108	0.966559	1
chr16:36476797-36477297	Stfa2	0.806223	4.82324e-112	0.669907	0.966559	1
chr16:36626799-36627299	Stfa2	0.801623	8.04536e-110	0.584607	0.966559	1
chr16:36209049-36209549	Stfa3	0.662263	7.74089e-62	0.476137	0.983166	1
chr16:36209900-36210400	Stfa3	0.82245	2.21522e-120	0.399975	0.983166	1
chr16:36212265-36212765	Stfa3	0.78688	4.5066e-103	0.51595	0.983166	1
chr16:36276663-36277163	Stfa3	0.856583	4.39117e-141	0.355542	0.983166	1
chr16:36289100-36289600	Stfa3	0.839292	5.4508e-130	0.675304	0.983166	1
chr16:36307576-36308076	Stfa3	0.880296	6.0822e-159	0.318914	0.983166	1
chr16:36355452-36355952	Stfa3	0.869142	4.14202e-150	0.588115	0.983166	1
chr16:36367491-36367991	Stfa3	0.885943	9.35387e-164	0.298534	0.983166	1
chr16:36408199-36408699	Stfa3	0.819236	1.15654e-118	0.365003	0.983166	1
chr16:36417008-36417508	Stfa3	0.84558	7.24584e-134	0.65474	0.983166	1
chr16:36420839-36421339	Stfa3	0.861976	7.53563e-145	0.616946	0.983166	1
chr16:36455362-36455862	Stfa3	0.828121	1.67816e-123	0.448952	0.983166	1
chr16:36465293-36465793	Stfa3	0.833158	2.2681e-126	0.681108	0.983166	1
chr16:36476797-36477297	Stfa3	0.813714	8.6737e-116	0.669907	0.983166	1
chr16:36626799-36627299	Stfa3	0.828551	9.63477e-124	0.584607	0.983166	1
chr16:36665822-36666322	Stfa3	0.667786	3.0924e-63	0.724685	0.983166	1
chr16:36417008-36417508	Cd86	0.504839	7.91307e-32	0.65474	0.878592	1
chr16:36420839-36421339	Cd86	0.562702	5.47971e-41	0.616946	0.878592	1
chr16:36465293-36465793	Cd86	0.531831	7.04893e-36	0.681108	0.878592	1
chr16:36476797-36477297	Cd86	0.718617	1.09728e-77	0.669907	0.878592	1
chr16:36626799-36627299	Cd86	0.818141	4.3714e-118	0.584607	0.878592	1
chr16:36640978-36641478	Cd86	0.537422	9.16452e-37	0.46176	0.878592	1
chr16:36642604-36643104	Cd86	0.800448	2.91108e-109	0.561146	0.878592	1
chr16:36665822-36666322	Cd86	0.902359	2.51116e-179	0.724685	0.878592	1
chr16:36709409-36709909	Cd86	0.798306	2.9728e-108	0.759908	0.878592	1
chr16:36711654-36712154	Cd86	0.824749	1.24082e-121	0.58366	0.878592	1
chr16:36709409-36709909	Hcls1	0.69508	1.28694e-70	0.759908	0.879896	1
chr16:36711654-36712154	Hcls1	0.717084	3.33136e-77	0.58366	0.879896	1
chr16:36934779-36935279	Hcls1	0.84271	4.49753e-132	0.752139	0.879896	1
chr16:36985731-36986231	Hcls1	0.705199	1.43852e-73	0.660312	0.879896	1
chr16:48786175-48786675	Retnlg	0.752437	3.20747e-89	0.506475	0.851613	1
chr16:49801457-49801957	Cd47	0.527944	2.84691e-35	0.660051	0.941903	1
chr16:49836704-49837204	Cd47	0.517389	1.15198e-33	0.344802	0.941903	1
chr16:75877116-75877616	Samsn1	0.641585	7.39413e-57	0.693126	0.797994	1
chr16:75909019-75909519	Samsn1	0.73925	1.65388e-84	0.319452	0.797994	1
chr16:75961009-75961509	Samsn1	0.612423	1.84033e-50	0.597495	0.797994	1
chr16:87652924-87653424	Bach1	0.569239	3.85194e-42	0.499087	0.477016	1
chr16:87654206-87654706	Bach1	0.607518	1.88678e-49	0.667126	0.477016	1
chr16:87661176-87661676	Bach1	0.589885	5.83351e-46	0.910851	0.477016	1
chr16:87688772-87689272	Bach1	0.577819	1.07545e-43	0.365106	0.477016	1
chr16:91354611-91355111	Il10rb	0.547189	2.36629e-38	0.694746	0.876665	1
chr16:91355121-91355621	Il10rb	0.59841	1.27876e-47	0.928808	0.876665	1
chr16:91366579-91367079	Il10rb	0.578725	7.325e-44	0.750259	0.876665	1
chr16:91398131-91398631	Il10rb	0.587843	1.4319e-45	0.866956	0.876665	1
chr16:91407900-91408400	Il10rb	0.522278	2.11148e-34	0.320049	0.876665	1
chr16:91415338-91415838	Il10rb	0.643111	3.27204e-57	0.506588	0.876665	1
chr16:91447169-91447669	Il10rb	0.56346	4.04161e-41	0.579444	0.876665	1
chr16:91451876-91452376	Il10rb	0.603314	1.34354e-48	0.53951	0.876665	1
chr16:91522427-91522927	Il10rb	0.554188	1.59129e-39	0.869796	0.876665	1
chr16:91522930-91523430	Il10rb	0.535457	1.88701e-36	0.886053	0.876665	1
chr16:91523896-91524396	Il10rb	0.544778	5.90156e-38	0.318012	0.876665	1
chr16:91526961-91527461	Il10rb	0.530621	1.09174e-35	0.770064	0.876665	1
chr16:91606906-91607406	Il10rb	0.571521	1.50453e-42	0.667399	0.876665	1
chr16:91522427-91522927	Donson	0.580016	4.22913e-44	0.869796	0.476053	1
chr16:91522930-91523430	Donson	0.581946	1.85174e-44	0.886053	0.476053	1
chr16:91606906-91607406	Donson	0.501109	2.6925e-31	0.667399	0.476053	1
chr16:92620653-92621153	Runx1	0.631025	1.84461e-54	0.829108	0.612651	1
chr16:92675641-92676141	Runx1	0.749941	2.63724e-88	0.696365	0.612651	1
chr16:92715418-92715918	Runx1	0.677017	1.21556e-65	0.799286	0.612651	1
chr16:92786985-92787485	Runx1	0.683438	2.27785e-67	0.305344	0.612651	1
chr16:92801471-92801971	Runx1	0.75787	2.99268e-91	0.736218	0.612651	1
chr16:92821905-92822405	Runx1	0.628706	6.02494e-54	0.289675	0.612651	1
chr16:92823492-92823992	Runx1	0.527359	3.50979e-35	0.594552	0.612651	1
chr16:92824693-92825193	Runx1	0.568494	5.22582e-42	0.723599	0.612651	1
chr16:92825314-92825814	Runx1	0.719955	4.13918e-78	0.56141	0.612651	1
chr16:92825824-92826324	Runx1	0.714057	2.9203e-76	0.688851	0.612651	1
chr16:92867359-92867859	Runx1	0.871752	4.21959e-152	0.480663	0.612651	1
chr16:93028571-93029071	Runx1	0.857568	9.24874e-142	0.89114	0.612651	1
chr16:96370158-96370658	Itgb2l	0.544331	6.98399e-38	0.434911	0.522757	1
chr16:96439637-96440137	Itgb2l	0.912475	2.18234e-190	0.883644	0.522757	1
chr16:96441583-96442083	Itgb2l	0.702043	1.2364e-72	0.312333	0.522757	1
chr16:96443400-96443900	Itgb2l	0.815822	7.10895e-117	0.725039	0.522757	1
chr16:96624716-96625216	Itgb2l	0.77762	4.17792e-99	0.369067	0.522757	1
chr17:6746027-6746527	Rsph3b	0.762537	4.8837e-93	0.68197	0.311625	1
chr17:6746672-6747172	Rsph3b	0.686626	3.04403e-68	0.953324	0.311625	1
chr17:7874681-7875181	Tagap	0.641528	7.62505e-57	0.760568	0.543162	1
chr17:7877930-7878430	Tagap	0.552454	3.12461e-39	0.258044	0.543162	1
chr17:7888961-7889461	Tagap	0.825778	3.3722e-122	0.383498	0.543162	1
chr17:7896980-7897480	Tagap	0.606836	2.60012e-49	0.325217	0.543162	1
chr17:7917104-7917604	Tagap	0.840187	1.5702e-130	0.788654	0.543162	1
chr17:7925713-7926213	Tagap	0.704867	1.80679e-73	0.784034	0.543162	1
chr17:17865049-17865549	Fpr1	0.7942	2.34431e-106	0.40303	0.385025	1
chr17:17866559-17867059	Fpr1	0.556116	7.48418e-40	0.26956	0.385025	1
chr17:17870869-17871369	Fpr1	0.857701	7.48266e-142	0.292254	0.385025	1
chr17:17876618-17877118	Fpr1	0.803582	9.2825e-111	0.421	0.385025	1
chr17:17865049-17865549	Fpr2	0.752215	3.86616e-89	0.40303	0.638724	1
chr17:17866559-17867059	Fpr2	0.583873	8.07602e-45	0.26956	0.638724	1
chr17:17870869-17871369	Fpr2	0.76256	4.78533e-93	0.292254	0.638724	1
chr17:17876618-17877118	Fpr2	0.698071	1.77687e-71	0.421	0.638724	1
chr17:24742273-24742773	Msrb1	0.68323	2.59665e-67	0.324347	0.945871	1
chr17:26535145-26535645	Dusp1	0.538629	5.86501e-37	0.969962	0.979482	1
chr17:27555757-27556257	Hmga1	0.500831	2.94746e-31	0.973784	0.439494	1
chr17:27551483-27551983	AI413582	0.532155	6.26899e-36	0.527138	0.742901	1
chr17:27552368-27552868	AI413582	0.536261	1.40485e-36	0.697289	0.742901	1
chr17:27555757-27556257	AI413582	0.630507	2.40375e-54	0.973784	0.742901	1
chr17:27994477-27994977	Def6	0.581097	2.66454e-44	0.665354	0.416199	1
chr17:28014848-28015348	Def6	0.567658	7.35593e-42	0.66225	0.416199	1
chr17:28180727-28181227	Def6	0.606566	2.95065e-49	0.827507	0.416199	1
chr17:28208081-28208581	Def6	0.554567	1.37319e-39	0.777157	0.416199	1
chr17:28211703-28212203	Def6	0.578783	7.1473e-44	0.442946	0.416199	1
chr17:28217838-28218338	Def6	0.511136	9.69676e-33	0.740484	0.416199	1
chr17:28259739-28260239	Def6	0.677442	9.36203e-66	0.780364	0.416199	1
chr17:28856010-28856510	Mapk13	0.528104	2.69011e-35	0.78188	0.944567	1
chr17:28856010-28856510	Cdkn1a	0.525808	6.09061e-35	0.78188	0.744488	1
chr17:28967126-28967626	Cdkn1a	0.524349	1.01992e-34	0.640726	0.744488	1
chr17:29009148-29009648	Cdkn1a	0.665497	1.18434e-62	0.590667	0.744488	1
chr17:29094194-29094694	Cdkn1a	0.534014	3.19316e-36	0.866997	0.744488	1
chr17:29095318-29095818	Cdkn1a	0.609842	6.29389e-50	0.984802	0.744488	1
chr17:29113847-29114347	Cdkn1a	0.633306	5.69462e-55	0.834577	0.744488	1
chr17:29164265-29164765	Cdkn1a	0.501138	2.66752e-31	0.378698	0.744488	1
chr17:29318828-29319328	Cdkn1a	0.615775	3.66553e-51	0.822204	0.744488	1
chr17:28946928-28947428	Rab44	0.85794	5.12696e-142	0.628565	0.369438	1
chr17:28951522-28952022	Rab44	0.547546	2.06461e-38	0.578555	0.369438	1
chr17:28966556-28967056	Rab44	0.570105	2.69805e-42	0.302334	0.369438	1
chr17:28967126-28967626	Rab44	0.766291	1.66014e-94	0.640726	0.369438	1
chr17:29009148-29009648	Rab44	0.6983	1.5259e-71	0.590667	0.369438	1
chr17:29113847-29114347	Rab44	0.750474	1.68371e-88	0.834577	0.369438	1
chr17:29172018-29172518	Rab44	0.583195	1.08199e-44	0.331452	0.369438	1
chr17:29318828-29319328	Rab44	0.756421	1.05437e-90	0.822204	0.369438	1
chr17:29113847-29114347	BC004004	0.586255	2.87012e-45	0.834577	0.672845	1
chr17:29113847-29114347	Pi16	0.627085	1.37013e-53	0.834577	0.638497	1
chr17:29318828-29319328	Pi16	0.715442	1.08634e-76	0.822204	0.638497	1
chr17:29393619-29394119	Pi16	0.523291	1.48037e-34	0.858074	0.638497	1
chr17:29394147-29394647	Pi16	0.560991	1.08724e-40	0.914296	0.638497	1
chr17:29394756-29395256	Pi16	0.649255	1.17316e-58	0.763676	0.638497	1
chr17:29395431-29395931	Pi16	0.668934	1.56898e-63	0.942257	0.638497	1
chr17:29396039-29396539	Pi16	0.655406	3.84489e-60	0.642825	0.638497	1
chr17:29488835-29489335	Pi16	0.703827	3.67762e-73	0.536154	0.638497	1
chr17:29494303-29494803	Pi16	0.561487	8.91449e-41	0.713519	0.638497	1
chr17:29497044-29497544	Pi16	0.534737	2.45561e-36	0.71709	0.638497	1
chr17:29497994-29498494	Pi16	0.692618	6.45191e-70	0.835389	0.638497	1
chr17:29510657-29511157	Pi16	0.721064	1.83661e-78	0.652443	0.638497	1
chr17:29113847-29114347	Fgd2	0.637989	4.96071e-56	0.834577	0.574562	1
chr17:29164265-29164765	Fgd2	0.566819	1.036e-41	0.378698	0.574562	1
chr17:29360632-29361132	Fgd2	0.573258	7.30978e-43	0.619857	0.574562	1
chr17:29361977-29362477	Fgd2	0.527148	3.78347e-35	0.786084	0.574562	1
chr17:29393619-29394119	Fgd2	0.762287	6.09999e-93	0.858074	0.574562	1
chr17:29394147-29394647	Fgd2	0.64275	3.96871e-57	0.914296	0.574562	1
chr17:29394756-29395256	Fgd2	0.753982	8.58337e-90	0.763676	0.574562	1
chr17:29395431-29395931	Fgd2	0.788694	7.10783e-104	0.942257	0.574562	1
chr17:29396039-29396539	Fgd2	0.527209	3.70305e-35	0.642825	0.574562	1
chr17:29431980-29432480	Fgd2	0.91981	3.01975e-199	0.851435	0.574562	1
chr17:29434423-29434923	Fgd2	0.661231	1.40183e-61	0.575846	0.574562	1
chr17:29494303-29494803	Fgd2	0.728711	6.04842e-81	0.713519	0.574562	1
chr17:29497994-29498494	Fgd2	0.559775	1.76438e-40	0.835389	0.574562	1
chr17:29510657-29511157	Fgd2	0.595654	4.4531e-47	0.652443	0.574562	1
chr17:29394756-29395256	Pim1	0.506701	4.27157e-32	0.763676	0.872754	1
chr17:29395431-29395931	Pim1	0.52837	2.44504e-35	0.942257	0.872754	1
chr17:29396039-29396539	Pim1	0.50055	3.22892e-31	0.642825	0.872754	1
chr17:30518821-30519321	1700097N02Rik	0.54663	2.92793e-38	0.694589	0.273423	1
chr17:33555446-33555946	Myo1f	0.874539	2.82284e-154	0.82495	0.791645	1
chr17:33563409-33563909	Myo1f	0.74263	1.09583e-85	0.354945	0.791645	1
chr17:33566161-33566661	Myo1f	0.757496	4.1482e-91	0.44151	0.791645	1
chr17:33637786-33638286	Myo1f	0.844816	2.19147e-133	0.544148	0.791645	1
chr17:33640061-33640561	Myo1f	0.72569	5.95366e-80	0.683661	0.791645	1
chr17:33555446-33555946	Zfp414	0.518861	6.93236e-34	0.82495	0.603355	1
chr17:33563409-33563909	Zfp414	0.552577	2.97834e-39	0.354945	0.603355	1
chr17:33566161-33566661	Zfp414	0.52788	2.91294e-35	0.44151	0.603355	1
chr17:33637786-33638286	Zfp414	0.529995	1.36758e-35	0.544148	0.603355	1
chr17:33640061-33640561	Zfp414	0.559523	1.94983e-40	0.683661	0.603355	1
chr17:33555446-33555946	Pram1	0.835131	1.61111e-127	0.82495	0.462223	1
chr17:33563409-33563909	Pram1	0.872849	5.95482e-153	0.354945	0.462223	1
chr17:33566161-33566661	Pram1	0.834437	4.10036e-127	0.44151	0.462223	1
chr17:33637786-33638286	Pram1	0.857321	1.3639e-141	0.544148	0.462223	1
chr17:33640061-33640561	Pram1	0.886901	1.34725e-164	0.683661	0.462223	1
chr17:33978119-33978619	Platr17	0.501379	2.46581e-31	0.6961	0.328005	1
chr17:33978693-33979193	Platr17	0.660824	1.77135e-61	0.986614	0.328005	1
chr17:34000092-34000592	Platr17	0.51385	3.86977e-33	0.989283	0.328005	1
chr17:34032830-34033330	Platr17	0.535422	1.91154e-36	0.747047	0.328005	1
chr17:34142867-34143367	Platr17	0.540723	2.69711e-37	0.748684	0.328005	1
chr17:33978693-33979193	Rgl2	0.550504	6.64406e-39	0.986614	0.719322	1
chr17:34000092-34000592	Rgl2	0.564201	2.99377e-41	0.989283	0.719322	1
chr17:34032830-34033330	Rgl2	0.522628	1.86782e-34	0.747047	0.719322	1
chr17:34142867-34143367	Rgl2	0.503234	1.34227e-31	0.748684	0.719322	1
chr17:34142867-34143367	B3galt4	0.503338	1.29757e-31	0.748684	0.364337	1
chr17:33978693-33979193	H2-K1	0.760404	3.23634e-92	0.986614	0.957604	1
[truncated: 20,546 more rows]

## Sheet: Cluster 1 p2g
chr1	9982940	9983440	chr1	10009136	10009137	0.59035
chr1	9991741	9992241	chr1	10009136	10009137	0.869738
chr1	9992245	9992745	chr1	10009136	10009137	0.791669
chr1	9997463	9997963	chr1	10009136	10009137	0.84865
chr1	23380064	23380564	chr1	23383175	23383176	0.823163
chr1	34464580	34465080	chr1	34459746	34459747	0.806345
chr1	36052535	36053035	chr1	36273425	36273426	0.771169
chr1	36162697	36163197	chr1	36273425	36273426	0.6888
chr1	36261999	36262499	chr1	36273425	36273426	0.647732
chr1	36263963	36264463	chr1	36273425	36273426	0.546708
chr1	36271607	36272107	chr1	36273425	36273426	0.65793
chr1	36273311	36273811	chr1	36273425	36273426	0.580337
chr1	36308238	36308738	chr1	36273425	36273426	0.586584
chr1	36261999	36262499	chr1	36471597	36471598	0.513873
chr1	36271607	36272107	chr1	36471597	36471598	0.527961
chr1	36947764	36948264	chr1	36761798	36761799	0.604793
chr1	36962286	36962786	chr1	36761798	36761799	0.604661
chr1	37586041	37586541	chr1	37541016	37541017	0.678675
chr1	40051144	40051644	chr1	40084768	40084769	0.595887
chr1	40083085	40083585	chr1	40084768	40084769	0.564308
chr1	40084414	40084914	chr1	40084768	40084769	0.595669
chr1	40294900	40295400	chr1	40515362	40515363	0.791509
chr1	40355886	40356386	chr1	40515362	40515363	0.5335
chr1	40392745	40393245	chr1	40515362	40515363	0.85611
chr1	40393262	40393762	chr1	40515362	40515363	0.694117
chr1	40501957	40502457	chr1	40515362	40515363	0.932066
chr1	51508959	51509459	chr1	51478399	51478400	0.538444
chr1	52655131	52655631	chr1	52727318	52727319	0.570862
chr1	52800159	52800659	chr1	52727318	52727319	0.556598
chr1	52652502	52653002	chr1	52817688	52817689	0.583323
chr1	52655131	52655631	chr1	52817688	52817689	0.634401
chr1	52800159	52800659	chr1	52817688	52817689	0.553869
chr1	53823496	53823996	chr1	53785215	53785216	0.636701
chr1	53824884	53825384	chr1	53785215	53785216	0.683177
chr1	53850859	53851359	chr1	53785215	53785216	0.818019
chr1	58742999	58743499	chr1	58795374	58795375	0.54954
chr1	58802338	58802838	chr1	58795374	58795375	0.611048
chr1	58802338	58802838	chr1	58973571	58973572	0.601784
chr1	74153707	74154207	chr1	74153994	74153995	0.782441
chr1	74155489	74155989	chr1	74153994	74153995	0.775786
chr1	74167072	74167572	chr1	74153994	74153995	0.898045
chr1	74227221	74227721	chr1	74153994	74153995	0.849911
chr1	74374986	74375486	chr1	74153994	74153995	0.742703
chr1	74381374	74381874	chr1	74153994	74153995	0.690665
chr1	74167072	74167572	chr1	74236518	74236519	0.576837
chr1	74227221	74227721	chr1	74236518	74236519	0.644513
chr1	74374986	74375486	chr1	74236518	74236519	0.602114
chr1	74381374	74381874	chr1	74236518	74236519	0.550285
chr1	74155489	74155989	chr1	74375203	74375204	0.635204
chr1	74167072	74167572	chr1	74375203	74375204	0.597584
chr1	74227221	74227721	chr1	74375203	74375204	0.746255
chr1	74368742	74369242	chr1	74375203	74375204	0.738085
chr1	74374986	74375486	chr1	74375203	74375204	0.903211
chr1	74381374	74381874	chr1	74375203	74375204	0.791149
chr1	74437960	74438460	chr1	74375203	74375204	0.518948
chr1	75187802	75188302	chr1	75142697	75142698	0.607071
chr1	75217888	75218388	chr1	75142697	75142698	0.570848
chr1	75187802	75188302	chr1	75192010	75192011	0.504788
chr1	75169588	75170088	chr1	75219294	75219295	0.501344
chr1	75187802	75188302	chr1	75219294	75219295	0.903199
chr1	75192398	75192898	chr1	75219294	75219295	0.57369
chr1	75213116	75213616	chr1	75219294	75219295	0.766996
chr1	75217888	75218388	chr1	75219294	75219295	0.710404
chr1	75219043	75219543	chr1	75219294	75219295	0.609267
chr1	85703474	85703974	chr1	85603891	85603892	0.717057
chr1	85735665	85736165	chr1	85603891	85603892	0.788886
chr1	85703474	85703974	chr1	85600703	85600704	0.781177
chr1	85735665	85736165	chr1	85600703	85600704	0.75724
chr1	85751450	85751950	chr1	85600703	85600704	0.501217
chr1	85837925	85838425	chr1	85600703	85600704	0.543073
chr1	85703474	85703974	chr1	85649988	85649989	0.717979
chr1	85735665	85736165	chr1	85649988	85649989	0.808271
chr1	85703474	85703974	chr1	85736606	85736607	0.663287
chr1	85735665	85736165	chr1	85736606	85736607	0.765329
chr1	85960823	85961323	chr1	85736606	85736607	0.655582
chr1	85977663	85978163	chr1	85736606	85736607	0.67557
chr1	87607536	87608036	chr1	87620312	87620313	0.68681
chr1	87620104	87620604	chr1	87620312	87620313	0.828397
chr1	87620774	87621274	chr1	87620312	87620313	0.625299
chr1	87621343	87621843	chr1	87620312	87620313	0.762706
chr1	87625215	87625715	chr1	87620312	87620313	0.648927
chr1	87626383	87626883	chr1	87620312	87620313	0.898527
chr1	87636856	87637356	chr1	87620312	87620313	0.562459
chr1	87637453	87637953	chr1	87620312	87620313	0.795209
chr1	87640221	87640721	chr1	87620312	87620313	0.720131
chr1	87650589	87651089	chr1	87620312	87620313	0.7798
chr1	87657905	87658405	chr1	87620312	87620313	0.740066
chr1	87659228	87659728	chr1	87620312	87620313	0.675791
chr1	87828207	87828707	chr1	87620312	87620313	0.835813
chr1	87607536	87608036	chr1	87756011	87756012	0.740948
chr1	87620104	87620604	chr1	87756011	87756012	0.681404
chr1	87620774	87621274	chr1	87756011	87756012	0.516007
chr1	87636856	87637356	chr1	87756011	87756012	0.509403
chr1	88556451	88556951	chr1	88702191	88702192	0.613415
chr1	88567127	88567627	chr1	88702191	88702192	0.622605
chr1	88576092	88576592	chr1	88702191	88702192	0.697554
chr1	88584362	88584862	chr1	88702191	88702192	0.675507
chr1	88586530	88587030	chr1	88702191	88702192	0.660381
chr1	88587254	88587754	chr1	88702191	88702192	0.777763
chr1	88587880	88588380	chr1	88702191	88702192	0.593632
chr1	88588965	88589465	chr1	88702191	88702192	0.780621
chr1	88655055	88655555	chr1	88702191	88702192	0.718053
chr1	91037959	91038459	chr1	90998727	90998728	0.585989
chr1	91041592	91042092	chr1	90998727	90998728	0.644163
chr1	91053467	91053967	chr1	90998727	90998728	0.52243
chr1	91055687	91056187	chr1	90998727	90998728	0.528659
chr1	91056405	91056905	chr1	90998727	90998728	0.713224
chr1	91057511	91058011	chr1	90998727	90998728	0.71384
chr1	91064820	91065320	chr1	90998727	90998728	0.609498
chr1	91080171	91080671	chr1	90998727	90998728	0.76463
chr1	91220444	91220944	chr1	90998727	90998728	0.658655
chr1	90974926	90975426	chr1	91179822	91179823	0.59489
chr1	91037959	91038459	chr1	91179822	91179823	0.608281
chr1	91041592	91042092	chr1	91179822	91179823	0.747554
chr1	91052844	91053344	chr1	91179822	91179823	0.52006
chr1	91054856	91055356	chr1	91179822	91179823	0.5408
chr1	91056405	91056905	chr1	91179822	91179823	0.705361
chr1	91057511	91058011	chr1	91179822	91179823	0.790797
chr1	91064820	91065320	chr1	91179822	91179823	0.616689
chr1	91079604	91080104	chr1	91179822	91179823	0.60225
chr1	91080171	91080671	chr1	91179822	91179823	0.836623
chr1	91220444	91220944	chr1	91179822	91179823	0.616965
chr1	91251348	91251848	chr1	91179822	91179823	0.540937
chr1	91220444	91220944	chr1	91459328	91459329	0.543313
chr1	91437822	91438322	chr1	91459328	91459329	0.558332
chr1	105965099	105965599	chr1	105780723	105780724	0.597448
chr1	105981155	105981655	chr1	105780723	105780724	0.558573
chr1	107583832	107584332	chr1	107590006	107590007	0.639247
chr1	120075455	120075955	chr1	120073780	120073781	0.636686
chr1	120099475	120099975	chr1	120073780	120073781	0.577119
chr1	125441580	125442080	chr1	125435727	125435728	0.648618
chr1	128447122	128447622	chr1	128592299	128592300	0.840704
chr1	128463433	128463933	chr1	128592299	128592300	0.742538
chr1	128549318	128549818	chr1	128592299	128592300	0.7594
chr1	128570012	128570512	chr1	128592299	128592300	0.768679
chr1	128590702	128591202	chr1	128592299	128592300	0.842068
chr1	128591412	128591912	chr1	128592299	128592300	0.629948
chr1	128592128	128592628	chr1	128592299	128592300	0.831777
chr1	128614481	128614981	chr1	128592299	128592300	0.665723
chr1	128705212	128705712	chr1	128592299	128592300	0.841965
chr1	128711547	128712047	chr1	128592299	128592300	0.7393
chr1	128712727	128713227	chr1	128592299	128592300	0.926206
chr1	128722013	128722513	chr1	128592299	128592300	0.745013
chr1	128724717	128725217	chr1	128592299	128592300	0.804252
chr1	128786765	128787265	chr1	128592299	128592300	0.756348
chr1	131118957	131119457	chr1	131097843	131097844	0.507526
chr1	134063413	134063913	chr1	134182404	134182405	0.516923
chr1	134065314	134065814	chr1	134182404	134182405	0.806012
chr1	134093699	134094199	chr1	134182404	134182405	0.79453
chr1	134094991	134095491	chr1	134182404	134182405	0.502014
chr1	134105614	134106114	chr1	134182404	134182405	0.733371
chr1	134106723	134107223	chr1	134182404	134182405	0.509443
chr1	134182023	134182523	chr1	134182404	134182405	0.704397
chr1	134189035	134189535	chr1	134182404	134182405	0.525923
chr1	134420000	134420500	chr1	134182404	134182405	0.572907
chr1	134093699	134094199	chr1	134332928	134332929	0.739935
chr1	134094991	134095491	chr1	134332928	134332929	0.705992
chr1	134420000	134420500	chr1	134332928	134332929	0.646449
chr1	134196378	134196878	chr1	134415378	134415379	0.57616
chr1	135132879	135133379	chr1	135284084	135284085	0.50807
chr1	135410871	135411371	chr1	135284084	135284085	0.581257
chr1	138136096	138136596	chr1	138175305	138175306	0.536495
chr1	138191853	138192353	chr1	138175305	138175306	0.889485
chr1	138322946	138323446	chr1	138175305	138175306	0.790958
chr1	143916528	143917028	chr1	144004149	144004150	0.660692
chr1	143918281	143918781	chr1	144004149	144004150	0.547232
chr1	144002564	144003064	chr1	144249104	144249105	0.508582
chr1	152594751	152595251	chr1	152766542	152766543	0.596702
chr1	152768046	152768546	chr1	152766542	152766543	0.541391
chr1	152778989	152779489	chr1	152766542	152766543	0.505838
chr1	152798151	152798651	chr1	152766542	152766543	0.622807
chr1	152804871	152805371	chr1	152766542	152766543	0.596724
chr1	152807504	152808004	chr1	152766542	152766543	0.812323
chr1	152810715	152811215	chr1	152766542	152766543	0.669503
chr1	152832159	152832659	chr1	152766542	152766543	0.596596
chr1	152837954	152838454	chr1	152766542	152766543	0.56405
chr1	152838773	152839273	chr1	152766542	152766543	0.592399
chr1	152768046	152768546	chr1	152800153	152800154	0.596257
chr1	152786789	152787289	chr1	152800153	152800154	0.556013
chr1	152798151	152798651	chr1	152800153	152800154	0.780533
chr1	152804871	152805371	chr1	152800153	152800154	0.681841
chr1	152807504	152808004	chr1	152800153	152800154	0.871439
chr1	152809804	152810304	chr1	152800153	152800154	0.630032
chr1	152810715	152811215	chr1	152800153	152800154	0.831115
chr1	152832159	152832659	chr1	152800153	152800154	0.708154
chr1	152837954	152838454	chr1	152800153	152800154	0.538988
chr1	152838773	152839273	chr1	152800153	152800154	0.616738
chr1	155050210	155050710	chr1	155099636	155099637	0.505722
chr1	156467557	156468057	chr1	156674339	156674340	0.609769
chr1	156615590	156616090	chr1	156674339	156674340	0.569
chr1	156921500	156922000	chr1	156674339	156674340	0.536984
chr1	164135276	164135776	chr1	164062076	164062077	0.940738
chr1	164135868	164136368	chr1	164062076	164062077	0.877172
chr1	164135276	164135776	chr1	164151835	164151836	0.935198
chr1	164135868	164136368	chr1	164151835	164151836	0.862371
chr1	165675243	165675743	chr1	165763780	165763781	0.69979
chr1	165681086	165681586	chr1	165763780	165763781	0.581365
chr1	165697505	165698005	chr1	165763780	165763781	0.713222
chr1	165700817	165701317	chr1	165763780	165763781	0.504977
chr1	170998272	170998772	chr1	170976071	170976072	0.77821
chr1	171016792	171017292	chr1	170976071	170976072	0.534752
chr1	171017391	171017891	chr1	170976071	170976072	0.744787
chr1	171019523	171020023	chr1	170976071	170976072	0.516053
chr1	171129176	171129676	chr1	170976071	170976072	0.590697
chr1	170998272	170998772	chr1	171018926	171018927	0.77284
chr1	171016792	171017292	chr1	171018926	171018927	0.735464
chr1	171017391	171017891	chr1	171018926	171018927	0.906512
chr1	171019523	171020023	chr1	171018926	171018927	0.618487
chr1	171231888	171232388	chr1	171018926	171018927	0.719417
chr1	171234092	171234592	chr1	171018926	171018927	0.909318
chr1	170998272	170998772	chr1	171059403	171059404	0.781875
chr1	171016792	171017292	chr1	171059403	171059404	0.550327
chr1	171017391	171017891	chr1	171059403	171059404	0.754027
chr1	171019523	171020023	chr1	171059403	171059404	0.523536
chr1	171129176	171129676	chr1	171059403	171059404	0.564503
chr1	171231888	171232388	chr1	171059403	171059404	0.60793
chr1	171234092	171234592	chr1	171059403	171059404	0.770042
chr1	171272075	171272575	chr1	171059403	171059404	0.689629
chr1	171274080	171274580	chr1	171059403	171059404	0.787255
chr1	171129176	171129676	chr1	171121661	171121662	0.54275
chr1	170998272	170998772	chr1	171234349	171234350	0.779846
chr1	171016792	171017292	chr1	171234349	171234350	0.560185
chr1	171017391	171017891	chr1	171234349	171234350	0.756959
chr1	171019523	171020023	chr1	171234349	171234350	0.528429
chr1	171129176	171129676	chr1	171234349	171234350	0.539306
chr1	171231888	171232388	chr1	171234349	171234350	0.603228
chr1	171234092	171234592	chr1	171234349	171234350	0.770155
chr1	171272075	171272575	chr1	171234349	171234350	0.695843
chr1	171274080	171274580	chr1	171234349	171234350	0.771529
chr1	171388723	171389223	chr1	171234349	171234350	0.882656
chr1	171389321	171389821	chr1	171234349	171234350	0.720657
chr1	171390074	171390574	chr1	171234349	171234350	0.906024
chr1	171450643	171451143	chr1	171234349	171234350	0.719689
chr1	171470903	171471403	chr1	171234349	171234350	0.659249
chr1	171129176	171129676	chr1	171370173	171370174	0.645531
chr1	171274080	171274580	chr1	171370173	171370174	0.620436
chr1	171388723	171389223	chr1	171370173	171370174	0.626948
chr1	171390074	171390574	chr1	171370173	171370174	0.691222
chr1	171450643	171451143	chr1	171370173	171370174	0.855948
chr1	171470903	171471403	chr1	171370173	171370174	0.710369
chr1	171558881	171559381	chr1	171370173	171370174	0.807139
chr1	171616906	171617406	chr1	171370173	171370174	0.836452
chr1	171231888	171232388	chr1	171388960	171388961	0.620016
chr1	171234092	171234592	chr1	171388960	171388961	0.785723
chr1	171272075	171272575	chr1	171388960	171388961	0.716543
chr1	171274080	171274580	chr1	171388960	171388961	0.773882
chr1	171388723	171389223	chr1	171388960	171388961	0.892035
chr1	171389321	171389821	chr1	171388960	171388961	0.729448
chr1	171390074	171390574	chr1	171388960	171388961	0.907732
chr1	171450643	171451143	chr1	171388960	171388961	0.706505
chr1	171470903	171471403	chr1	171388960	171388961	0.65012
chr1	171558881	171559381	chr1	171388960	171388961	0.899611
chr1	171616906	171617406	chr1	171388960	171388961	0.850861
chr1	171388723	171389223	chr1	171607410	171607411	0.762806
chr1	171389321	171389821	chr1	171607410	171607411	0.605578
chr1	171390074	171390574	chr1	171607410	171607411	0.833276
chr1	171450643	171451143	chr1	171607410	171607411	0.886927
chr1	171470903	171471403	chr1	171607410	171607411	0.765868
chr1	171558881	171559381	chr1	171607410	171607411	0.913558
chr1	171616906	171617406	chr1	171607410	171607411	0.92551
chr1	171450643	171451143	chr1	171682055	171682056	0.874209
chr1	171470903	171471403	chr1	171682055	171682056	0.760821
chr1	171558881	171559381	chr1	171682055	171682056	0.892335
chr1	171616906	171617406	chr1	171682055	171682056	0.913832
chr1	171917428	171917928	chr1	171682055	171682056	0.80635
chr1	171558881	171559381	chr1	171767132	171767133	0.520961
chr1	171616906	171617406	chr1	171767132	171767133	0.628258
chr1	171616906	171617406	chr1	171839697	171839698	0.900852
chr1	171849439	171849939	chr1	171839697	171839698	0.551511
chr1	171917428	171917928	chr1	171839697	171839698	0.882178
chr1	171917428	171917928	chr1	171917537	171917538	0.634723
chr1	173408954	173409454	chr1	173420604	173420605	0.649937
chr1	173420299	173420799	chr1	173420604	173420605	0.808338
chr1	173427363	173427863	chr1	173420604	173420605	0.770269
chr1	173420299	173420799	chr1	173599274	173599275	0.67797
chr1	173427363	173427863	chr1	173599274	173599275	0.657548
chr1	173408954	173409454	chr1	173630859	173630860	0.849736
chr1	173420299	173420799	chr1	173630859	173630860	0.861953
chr1	173427363	173427863	chr1	173630859	173630860	0.802657
chr1	173809232	173809732	chr1	173630859	173630860	0.757393
chr1	173912757	173913257	chr1	173741809	173741810	0.686746
chr1	173809232	173809732	chr1	173905631	173905632	0.582831
chr1	173912757	173913257	chr1	173905631	173905632	0.680545
chr1	174040739	174041239	chr1	173905631	173905632	0.664886
chr1	173809232	173809732	chr1	173914179	173914180	0.62831
chr1	173912757	173913257	chr1	173914179	173914180	0.68162
chr1	174040739	174041239	chr1	173914179	173914180	0.688921
chr1	180365112	180365612	chr1	180330476	180330477	0.512701
chr1	180762426	180762926	chr1	180942518	180942519	0.548947
chr1	180766486	180766986	chr1	180942518	180942519	0.607544
chr1	180771299	180771799	chr1	180942518	180942519	0.599265
chr1	180826593	180827093	chr1	180942518	180942519	0.617428
chr1	180829729	180830229	chr1	180942518	180942519	0.57465
chr1	180848464	180848964	chr1	180942518	180942519	0.52649
chr1	180885668	180886168	chr1	180942518	180942519	0.548951
chr1	181170031	181170531	chr1	180942518	180942519	0.567104
chr1	181845758	181846258	chr1	181842401	181842402	0.519246
chr1	181860599	181861099	chr1	181842401	181842402	0.670528
chr1	181865561	181866061	chr1	181842401	181842402	0.619883
chr1	181922010	181922510	chr1	181842401	181842402	0.534753
chr1	182254622	182255122	chr1	182300834	182300835	0.926827
chr1	182271541	182272041	chr1	182300834	182300835	0.72304
chr1	182283244	182283744	chr1	182300834	182300835	0.524594
chr1	182287710	182288210	chr1	182300834	182300835	0.840691
chr1	184617655	184618155	chr1	184732493	184732494	0.856358
chr1	184728695	184729195	chr1	184732493	184732494	0.695129
chr1	184733112	184733612	chr1	184732493	184732494	0.549718
chr1	184734806	184735306	chr1	184732493	184732494	0.538239
chr1	191248377	191248877	chr1	191397041	191397042	0.508407
chr1	191249900	191250400	chr1	191397041	191397042	0.525215
chr1	191269461	191269961	chr1	191397041	191397042	0.587981
chr1	191277544	191278044	chr1	191397041	191397042	0.532829
chr1	191280648	191281148	chr1	191397041	191397042	0.566514
chr1	191281153	191281653	chr1	191397041	191397042	0.605832
chr1	191288718	191289218	chr1	191397041	191397042	0.609061
chr1	193191457	193191957	chr1	193201546	193201547	0.63784
chr1	193200540	193201040	chr1	193201546	193201547	0.82107
chr1	193201282	193201782	chr1	193201546	193201547	0.945208
chr1	193242133	193242633	chr1	193201546	193201547	0.65823
chr1	193274363	193274863	chr1	193201546	193201547	0.718077
chr1	193274908	193275408	chr1	193201546	193201547	0.645101
chr1	193200540	193201040	chr1	193264045	193264046	0.767905
chr1	193201282	193201782	chr1	193264045	193264046	0.779206
chr1	193242133	193242633	chr1	193264045	193264046	0.794419
chr1	193274363	193274863	chr1	193264045	193264046	0.861732
chr1	193274908	193275408	chr1	193264045	193264046	0.833716
chr10	5548571	5549071	chr10	5551482	5551483	0.612125
chr10	6982784	6983284	chr10	7023185	7023186	0.803453
chr10	7052665	7053165	chr10	7023185	7023186	0.790825
chr10	7062856	7063356	chr10	7023185	7023186	0.835549
chr10	7063482	7063982	chr10	7023185	7023186	0.797162
chr10	7063992	7064492	chr10	7023185	7023186	0.879738
chr10	10448950	10449450	chr10	10558207	10558208	0.793843
chr10	10456900	10457400	chr10	10558207	10558208	0.80918
chr10	10557924	10558424	chr10	10558207	10558208	0.590128
chr10	10732996	10733496	chr10	10558207	10558208	0.805598
chr10	12929743	12930243	chr10	12923127	12923128	0.736882
chr10	12974188	12974688	chr10	12923127	12923128	0.722913
chr10	12975841	12976341	chr10	12923127	12923128	0.870355
chr10	18999302	18999802	chr10	19015410	19015411	0.622694
chr10	19062012	19062512	chr10	19015410	19015411	0.706652
chr10	19094169	19094669	chr10	19015410	19015411	0.523103
chr10	19691818	19692318	chr10	19591958	19591959	0.67451
chr10	20990600	20991100	chr10	21160984	21160985	0.682854
chr10	24911229	24911729	chr10	24712159	24712160	0.621603
chr10	40128332	40128832	chr10	40142254	40142255	0.708552
chr10	40275801	40276301	chr10	40142254	40142255	0.510345
chr10	40310192	40310692	chr10	40142254	40142255	0.587711
chr10	51453966	51454466	chr10	51480612	51480613	0.589813
chr10	51490721	51491221	chr10	51480612	51480613	0.658892
chr10	51528773	51529273	chr10	51480612	51480613	0.561524
chr10	51530742	51531242	chr10	51480612	51480613	0.815519
chr10	51453966	51454466	chr10	51490898	51490899	0.776873
chr10	51481436	51481936	chr10	51490898	51490899	0.572105
chr10	51490721	51491221	chr10	51490898	51490899	0.80308
chr10	51528773	51529273	chr10	51490898	51490899	0.542306
chr10	51530742	51531242	chr10	51490898	51490899	0.90166
chr10	51571228	51571728	chr10	51490898	51490899	0.600902
chr10	57727620	57728120	chr10	57631981	57631982	0.801406
chr10	57727620	57728120	chr10	57794544	57794545	0.577595
chr10	60252601	60253101	chr10	60277628	60277629	0.543317
chr10	60260574	60261074	chr10	60277628	60277629	0.562597
chr10	60367022	60367522	chr10	60277628	60277629	0.515718
chr10	60252601	60253101	chr10	60346851	60346852	0.822037
chr10	60259595	60260095	chr10	60346851	60346852	0.786239
chr10	60260574	60261074	chr10	60346851	60346852	0.863715
chr10	60284403	60284903	chr10	60346851	60346852	0.515651
chr10	60341516	60342016	chr10	60346851	60346852	0.768118
chr10	60344068	60344568	chr10	60346851	60346852	0.927701
chr10	60348888	60349388	chr10	60346851	60346852	0.906641
chr10	60367022	60367522	chr10	60346851	60346852	0.881036
chr10	60369325	60369825	chr10	60346851	60346852	0.815848
chr10	60371573	60372073	chr10	60346851	60346852	0.780657
chr10	60388320	60388820	chr10	60346851	60346852	0.818391
chr10	60389426	60389926	chr10	60346851	60346852	0.770265
chr10	60390925	60391425	chr10	60346851	60346852	0.935822
chr10	60395685	60396185	chr10	60346851	60346852	0.673497
chr10	60706121	60706621	chr10	60752782	60752783	0.671666
chr10	60931805	60932305	chr10	60752782	60752783	0.619865
chr10	62491107	62491607	chr10	62507755	62507756	0.787018
chr10	62491648	62492148	chr10	62507755	62507756	0.805134
chr10	62496235	62496735	chr10	62507755	62507756	0.845625
chr10	62497948	62498448	chr10	62507755	62507756	0.559461
chr10	62501919	62502419	chr10	62507755	62507756	0.777123
chr10	62503944	62504444	chr10	62507755	62507756	0.843491
chr10	62505052	62505552	chr10	62507755	62507756	0.768357
chr10	62505661	62506161	chr10	62507755	62507756	0.854622
chr10	62507549	62508049	chr10	62507755	62507756	0.772688
chr10	62508465	62508965	chr10	62507755	62507756	0.596709
chr10	62509044	62509544	chr10	62507755	62507756	0.849885
chr10	62541485	62541985	chr10	62507755	62507756	0.931561
chr10	62542521	62543021	chr10	62507755	62507756	0.516137
chr10	62543363	62543863	chr10	62507755	62507756	0.951242
chr10	62546858	62547358	chr10	62507755	62507756	0.566116
chr10	62553762	62554262	chr10	62507755	62507756	0.689046
chr10	62948530	62949030	chr10	62947029	62947030	0.709847
chr10	67068859	67069359	chr10	67285281	67285282	0.522442
chr10	77519089	77519589	chr10	77530348	77530349	0.878443
chr10	77520504	77521004	chr10	77530348	77530349	0.836337
chr10	77522190	77522690	chr10	77530348	77530349	0.580558
chr10	77530044	77530544	chr10	77530348	77530349	0.907012
chr10	77530772	77531272	chr10	77530348	77530349	0.74581
chr10	77531582	77532082	chr10	77530348	77530349	0.844715
chr10	77536665	77537165	chr10	77530348	77530349	0.933573
chr10	77540619	77541119	chr10	77530348	77530349	0.654615
chr10	77544846	77545346	chr10	77530348	77530349	0.826314
chr10	77548629	77549129	chr10	77530348	77530349	0.783544
chr10	77549997	77550497	chr10	77530348	77530349	0.826215
chr10	77550897	77551397	chr10	77530348	77530349	0.950726
chr10	77558132	77558632	chr10	77530348	77530349	0.69954
chr10	78372873	78373373	chr10	78425670	78425671	0.637923
chr10	79915136	79915636	chr10	79789042	79789043	0.89096
chr10	79928294	79928794	chr10	79789042	79789043	0.70918
chr10	80016382	80016882	chr10	79789042	79789043	0.768032
chr10	80017323	80017823	chr10	79789042	79789043	0.915364
chr10	80018608	80019108	chr10	79789042	79789043	0.734961
chr10	80024106	80024606	chr10	79789042	79789043	0.597401
chr10	79915136	79915636	chr10	79879667	79879668	0.821122
chr10	79928294	79928794	chr10	79879667	79879668	0.655794
chr10	80016382	80016882	chr10	79879667	79879668	0.717572
chr10	80017323	80017823	chr10	79879667	79879668	0.842953
chr10	80018608	80019108	chr10	79879667	79879668	0.693017
chr10	80024106	80024606	chr10	79879667	79879668	0.707967
chr10	80074532	80075032	chr10	79879667	79879668	0.62153
chr10	80075104	80075604	chr10	79879667	79879668	0.641164
chr10	80086832	80087332	chr10	79879667	79879668	0.726484
chr10	80087435	80087935	chr10	79879667	79879668	0.664201
chr10	80121582	80122082	chr10	79879667	79879668	0.691422
chr10	79877646	79878146	chr10	79886312	79886313	0.506308
chr10	79915136	79915636	chr10	79886312	79886313	0.886791
chr10	79928294	79928794	chr10	79886312	79886313	0.714948
chr10	80016382	80016882	chr10	79886312	79886313	0.772787
chr10	80017323	80017823	chr10	79886312	79886313	0.919219
chr10	80018608	80019108	chr10	79886312	79886313	0.7406
chr10	80024106	80024606	chr10	79886312	79886313	0.607891
chr10	80074532	80075032	chr10	79886312	79886313	0.673646
chr10	80075104	80075604	chr10	79886312	79886313	0.722378
chr10	80086832	80087332	chr10	79886312	79886313	0.767139
chr10	80087435	80087935	chr10	79886312	79886313	0.712182
chr10	80121582	80122082	chr10	79886312	79886313	0.797721
chr10	79915136	79915636	chr10	79927043	79927044	0.605981
chr10	79928294	79928794	chr10	79927043	79927044	0.633604
chr10	80016382	80016882	chr10	79927043	79927044	0.760767
chr10	80017323	80017823	chr10	79927043	79927044	0.745909
chr10	80018608	80019108	chr10	79927043	79927044	0.573211
chr10	80024106	80024606	chr10	79927043	79927044	0.790461
chr10	80051975	80052475	chr10	79927043	79927044	0.514972
chr10	80074532	80075032	chr10	79927043	79927044	0.516417
chr10	80075104	80075604	chr10	79927043	79927044	0.604457
chr10	80086832	80087332	chr10	79927043	79927044	0.77574
chr10	80087435	80087935	chr10	79927043	79927044	0.625963
chr10	80098595	80099095	chr10	79927043	79927044	0.53443
chr10	80121582	80122082	chr10	79927043	79927044	0.541688
chr10	80155934	80156434	chr10	79927043	79927044	0.518945
chr10	80016382	80016882	chr10	79997615	79997616	0.537898
chr10	80024106	80024606	chr10	79997615	79997616	0.696085
chr10	80086832	80087332	chr10	79997615	79997616	0.529003
chr10	79877646	79878146	chr10	80016672	80016673	0.593999
chr10	79915136	79915636	chr10	80016672	80016673	0.643841
chr10	79928294	79928794	chr10	80016672	80016673	0.61317
chr10	79940740	79941240	chr10	80016672	80016673	0.608683
chr10	79945758	79946258	chr10	80016672	80016673	0.568934
chr10	79946635	79947135	chr10	80016672	80016673	0.531448
chr10	79994356	79994856	chr10	80016672	80016673	0.511397
chr10	80016382	80016882	chr10	80016672	80016673	0.860834
chr10	80017323	80017823	chr10	80016672	80016673	0.805087
chr10	80018608	80019108	chr10	80016672	80016673	0.626562
chr10	80024106	80024606	chr10	80016672	80016673	0.72261
chr10	80051975	80052475	chr10	80016672	80016673	0.505568
chr10	80074532	80075032	chr10	80016672	80016673	0.585842
chr10	80075104	80075604	chr10	80016672	80016673	0.723143
chr10	80086832	80087332	chr10	80016672	80016673	0.79468
chr10	80087435	80087935	chr10	80016672	80016673	0.68992
chr10	80098595	80099095	chr10	80016672	80016673	0.524749
chr10	80121582	80122082	chr10	80016672	80016673	0.566075
chr10	80155934	80156434	chr10	80016672	80016673	0.601253
chr10	80215028	80215528	chr10	80016672	80016673	0.597755
chr10	80024106	80024606	chr10	80172944	80172945	0.545867
chr10	80051975	80052475	chr10	80172944	80172945	0.540847
chr10	80086832	80087332	chr10	80172944	80172945	0.539357
chr10	81134162	81134662	chr10	81252935	81252936	0.584889
chr10	81146934	81147434	chr10	81252935	81252936	0.504785
chr10	81221348	81221848	chr10	81252935	81252936	0.509996
chr10	81297814	81298314	chr10	81252935	81252936	0.693054
chr10	81298693	81299193	chr10	81252935	81252936	0.724252
chr10	81365525	81366025	chr10	81252935	81252936	0.519529
chr10	81291745	81292245	chr10	81500137	81500138	0.50818
chr10	81297260	81297760	chr10	81500137	81500138	0.666994
chr10	81297814	81298314	chr10	81500137	81500138	0.652083
chr10	81298693	81299193	chr10	81500137	81500138	0.731658
chr10	81356259	81356759	chr10	81500137	81500138	0.670727
chr10	81358851	81359351	chr10	81500137	81500138	0.573301
chr10	81405802	81406302	chr10	81500137	81500138	0.528878
chr10	81407445	81407945	chr10	81500137	81500138	0.619572
chr10	81494621	81495121	chr10	81500137	81500138	0.745299
chr10	81497692	81498192	chr10	81500137	81500138	0.744281
chr10	81499420	81499920	chr10	81500137	81500138	0.778573
chr10	81517211	81517711	chr10	81500137	81500138	0.785043
chr10	81524001	81524501	chr10	81500137	81500138	0.801338
chr10	81291745	81292245	chr10	81524225	81524226	0.540365
chr10	81297260	81297760	chr10	81524225	81524226	0.595932
chr10	81297814	81298314	chr10	81524225	81524226	0.879432
chr10	81298693	81299193	chr10	81524225	81524226	0.923392
chr10	81356259	81356759	chr10	81524225	81524226	0.728416
chr10	81365525	81366025	chr10	81524225	81524226	0.522707
chr10	81405802	81406302	chr10	81524225	81524226	0.502839
chr10	81407445	81407945	chr10	81524225	81524226	0.552813
chr10	81497692	81498192	chr10	81524225	81524226	0.590432
chr10	81517211	81517711	chr10	81524225	81524226	0.718071
chr10	81519574	81520074	chr10	81524225	81524226	0.690139
chr10	81524001	81524501	chr10	81524225	81524226	0.820825
chr10	82974132	82974632	chr10	82812123	82812124	0.553809
chr10	84508592	84509092	chr10	84576947	84576948	0.771423
chr10	84516328	84516828	chr10	84576947	84576948	0.745028
chr10	84517948	84518448	chr10	84576947	84576948	0.704089
chr10	84549106	84549606	chr10	84576947	84576948	0.624965
chr10	84549750	84550250	chr10	84576947	84576948	0.56447
chr10	84551766	84552266	chr10	84576947	84576948	0.729633
chr10	84573610	84574110	chr10	84576947	84576948	0.723982
chr10	84774529	84775029	chr10	84576947	84576948	0.508893
chr10	91242635	91243135	chr10	91082743	91082744	0.518541
chr10	93124212	93124712	chr10	93311159	93311160	0.527239
chr10	93335607	93336107	chr10	93311159	93311160	0.530587
chr10	93261232	93261732	chr10	93453396	93453397	0.53782
chr10	93488274	93488774	chr10	93453396	93453397	0.571417
chr10	99270232	99270732	chr10	99263231	99263232	0.503525
chr10	110918340	110918840	chr10	111164802	111164803	0.627166
chr10	111103019	111103519	chr10	111164802	111164803	0.639157
chr10	111156197	111156697	chr10	111164802	111164803	0.522726
chr10	111996397	111996897	chr10	111997264	111997265	0.848662
chr10	111996962	111997462	chr10	111997264	111997265	0.739678
chr10	112000607	112001107	chr10	111997264	111997265	0.757322
chr10	112002510	112003010	chr10	111997264	111997265	0.92939
chr10	117215383	117215883	chr10	117282272	117282273	0.750373
chr10	117216040	117216540	chr10	117282272	117282273	0.819397
chr10	117282068	117282568	chr10	117282272	117282273	0.80863
chr10	117288176	117288676	chr10	117282272	117282273	0.824727
chr10	117215383	117215883	chr10	117292868	117292869	0.639135
chr10	117216040	117216540	chr10	117292868	117292869	0.700391
chr10	117282068	117282568	chr10	117292868	117292869	0.801658
chr10	117288176	117288676	chr10	117292868	117292869	0.761083
chr10	117860871	117861371	chr10	117710758	117710759	0.676105
chr10	117755314	117755814	chr10	117845974	117845975	0.586806
chr10	117860871	117861371	chr10	117845974	117845975	0.706257
chr10	118082957	118083457	chr10	117845974	117845975	0.593592
chr10	118085266	118085766	chr10	117845974	117845975	0.639056
chr10	120323511	120324011	chr10	120201537	120201538	0.52347
chr10	121373969	121374469	chr10	121365090	121365091	0.512174
chr10	121374579	121375079	chr10	121365090	121365091	0.626681
chr10	121488610	121489110	chr10	121365090	121365091	0.511059
chr10	121496691	121497191	chr10	121365090	121365091	0.620666
chr10	121591064	121591564	chr10	121365090	121365091	0.534227
chr10	121596496	121596996	chr10	121365090	121365091	0.599805
chr10	121705771	121706271	chr10	121476250	121476251	0.504859
chr10	122569695	122570195	chr10	122678762	122678763	0.916558
chr10	122614723	122615223	chr10	122678762	122678763	0.601482
chr10	122814987	122815487	chr10	122678762	122678763	0.781245
chr10	127162799	127163299	chr10	127165156	127165157	0.580571
chr10	127167203	127167703	chr10	127165156	127165157	0.698132
chr10	127323372	127323872	chr10	127165156	127165157	0.84045
chr10	127162799	127163299	chr10	127321964	127321965	0.5906
chr10	127167203	127167703	chr10	127321964	127321965	0.699674
chr10	127323372	127323872	chr10	127321964	127321965	0.824215
chr10	127481367	127481867	chr10	127642986	127642987	0.556746
chr10	127577791	127578291	chr10	127642986	127642987	0.620949
chr10	127603679	127604179	chr10	127642986	127642987	0.521721
chr10	127631273	127631773	chr10	127642986	127642987	0.649399
chr10	127631799	127632299	chr10	127642986	127642987	0.746548
chr10	128715496	128715996	chr10	128744855	128744856	0.548592
chr11	3382559	3383059	chr11	3504821	3504822	0.821576
chr11	3486311	3486811	chr11	3504821	3504822	0.721168
chr11	3510261	3510761	chr11	3504821	3504822	0.810999
chr11	3676257	3676757	chr11	3504821	3504822	0.608368
chr11	3676257	3676757	chr11	3914664	3914665	0.510845
chr11	3929980	3930480	chr11	3914664	3914665	0.672751
chr11	3929980	3930480	chr11	3932078	3932079	0.537889
chr11	4217893	4218393	chr11	4160354	4160355	0.520655
chr11	4195517	4196017	chr11	4236785	4236786	0.69134
chr11	4220377	4220877	chr11	4236785	4236786	0.646018
chr11	4229790	4230290	chr11	4236785	4236786	0.88501
chr11	4230851	4231351	chr11	4236785	4236786	0.801091
chr11	4231361	4231861	chr11	4236785	4236786	0.884774
chr11	4232619	4233119	chr11	4236785	4236786	0.925779
chr11	4236155	4236655	chr11	4236785	4236786	0.591867
chr11	4237430	4237930	chr11	4236785	4236786	0.955794
chr11	4240031	4240531	chr11	4236785	4236786	0.939035
chr11	4256977	4257477	chr11	4236785	4236786	0.879243
chr11	4260317	4260817	chr11	4236785	4236786	0.501305
chr11	6365885	6366385	chr11	6520958	6520959	0.501785
chr11	6391491	6391991	chr11	6520958	6520959	0.610513
chr11	6519594	6520094	chr11	6520958	6520959	0.847027
chr11	6520684	6521184	chr11	6520958	6520959	0.790091
chr11	6615444	6615944	chr11	6520958	6520959	0.614716
chr11	6623735	6624235	chr11	6520958	6520959	0.639887
chr11	11557609	11558109	chr11	11685925	11685926	0.770169
chr11	11558627	11559127	chr11	11685925	11685926	0.877021
chr11	11564097	11564597	chr11	11685925	11685926	0.896982
chr11	11573629	11574129	chr11	11685925	11685926	0.888841
chr11	11685891	11686391	chr11	11685925	11685926	0.806428
chr11	11763316	11763816	chr11	11685925	11685926	0.838541
chr11	16977589	16978089	chr11	17052381	17052382	0.734493
chr11	16984403	16984903	chr11	17052381	17052382	0.730662
chr11	16987642	16988142	chr11	17052381	17052382	0.608161
chr11	16999363	16999863	chr11	17052381	17052382	0.57352
chr11	17002680	17003180	chr11	17052381	17052382	0.706674
chr11	17004873	17005373	chr11	17052381	17052382	0.881018
chr11	17008412	17008912	chr11	17052381	17052382	0.845479
chr11	21425413	21425913	chr11	21239032	21239033	0.523234
chr11	32542660	32543160	chr11	32533266	32533267	0.528318
chr11	34008241	34008741	chr11	34047201	34047202	0.563437
chr11	34009705	34010205	chr11	34047201	34047202	0.874176
chr11	34031351	34031851	chr11	34047201	34047202	0.84412
chr11	34047365	34047865	chr11	34047201	34047202	0.588856
chr11	34063936	34064436	chr11	34047201	34047202	0.769096
chr11	34072256	34072756	chr11	34047201	34047202	0.734869
chr11	34782426	34782926	chr11	34783905	34783906	0.717482
chr11	34782991	34783491	chr11	34783905	34783906	0.894232
chr11	34783669	34784169	chr11	34783905	34783906	0.92403
chr11	46310214	46310714	chr11	46312859	46312860	0.647661
chr11	46311181	46311681	chr11	46312859	46312860	0.522613
chr11	46314539	46315039	chr11	46312859	46312860	0.789095
chr11	46461407	46461907	chr11	46312859	46312860	0.650185
chr11	46461909	46462409	chr11	46312859	46312860	0.721329
chr11	46480428	46480928	chr11	46312859	46312860	0.631354
chr11	46314539	46315039	chr11	46389515	46389516	0.565126
chr11	46480428	46480928	chr11	46389515	46389516	0.577646
chr11	46310214	46310714	chr11	46454931	46454932	0.626012
chr11	46311181	46311681	chr11	46454931	46454932	0.595315
chr11	46314539	46315039	chr11	46454931	46454932	0.741511
chr11	46449707	46450207	chr11	46454931	46454932	0.703846
chr11	46461407	46461907	chr11	46454931	46454932	0.788428
chr11	46461909	46462409	chr11	46454931	46454932	0.741276
chr11	46480428	46480928	chr11	46454931	46454932	0.831587
chr11	48787688	48788188	chr11	48871346	48871347	0.533874
chr11	50149524	50150024	chr11	50025331	50025332	0.531178
chr11	50239140	50239640	chr11	50025331	50025332	0.532397
chr11	50238273	50238773	chr11	50238532	50238533	0.572639
chr11	50239140	50239640	chr11	50238532	50238533	0.739965
chr11	53794754	53795254	chr11	54028090	54028091	0.588784
chr11	53805729	53806229	chr11	54028090	54028091	0.652833
chr11	54149802	54150302	chr11	54028090	54028091	0.60484
chr11	54155833	54156333	chr11	54028090	54028091	0.726658
chr11	54935960	54936460	chr11	54787703	54787704	0.503337
chr11	59541205	59541705	chr11	59541585	59541586	0.884992
chr11	59542417	59542917	chr11	59541585	59541586	0.84965
chr11	59543932	59544432	chr11	59541585	59541586	0.838706
chr11	59554625	59555125	chr11	59541585	59541586	0.819979
chr11	59565774	59566274	chr11	59541585	59541586	0.66488
chr11	59571027	59571527	chr11	59541585	59541586	0.676464
chr11	59565774	59566274	chr11	59810039	59810040	0.634844
chr11	59571027	59571527	chr11	59810039	59810040	0.618796
chr11	60930661	60931161	chr11	61126755	61126756	0.542711
chr11	60935228	60935728	chr11	61126755	61126756	0.717231
chr11	60935892	60936392	chr11	61126755	61126756	0.593689
chr11	61108760	61109260	chr11	61126755	61126756	0.587344
chr11	61116137	61116637	chr11	61126755	61126756	0.826729
chr11	61653034	61653534	chr11	61653321	61653322	0.53236
chr11	68417862	68418362	chr11	68432125	68432126	0.525888
chr11	68431836	68432336	chr11	68432125	68432126	0.543344
chr11	68440014	68440514	chr11	68432125	68432126	0.71019
chr11	68440905	68441405	chr11	68432125	68432126	0.777042
chr11	68502285	68502785	chr11	68432125	68432126	0.739605
chr11	68502786	68503286	chr11	68432125	68432126	0.75863
chr11	68502285	68502785	chr11	68503019	68503020	0.515915
chr11	68502786	68503286	chr11	68503019	68503020	0.58923
chr11	69554745	69555245	chr11	69666170	69666171	0.745029
chr11	69671153	69671653	chr11	69666170	69666171	0.505756
chr11	69671153	69671653	chr11	69895539	69895540	0.560617
chr11	69881336	69881836	chr11	69895539	69895540	0.667845
chr11	69930965	69931465	chr11	69895539	69895540	0.889593
chr11	70084642	70085142	chr11	70166623	70166624	0.787692
chr11	70372350	70372850	chr11	70432580	70432581	0.504604
chr11	70433495	70433995	chr11	70432580	70432581	0.591454
chr11	70436955	70437455	chr11	70432580	70432581	0.5966
chr11	70446665	70447165	chr11	70432580	70432581	0.665892
chr11	70453119	70453619	chr11	70432580	70432581	0.587167
chr11	70650343	70650843	chr11	70432580	70432581	0.54299
chr11	70667377	70667877	chr11	70432580	70432581	0.577968
chr11	70679932	70680432	chr11	70432580	70432581	0.709134
chr11	70433495	70433995	chr11	70654650	70654651	0.539575
chr11	70436955	70437455	chr11	70654650	70654651	0.542554
chr11	70446665	70447165	chr11	70654650	70654651	0.564342
chr11	70453119	70453619	chr11	70654650	70654651	0.541808
chr11	70679932	70680432	chr11	70654650	70654651	0.616611
chr11	70683583	70684083	chr11	70654650	70654651	0.567476
chr11	70650343	70650843	chr11	70812561	70812562	0.694671
chr11	70667377	70667877	chr11	70812561	70812562	0.675822
chr11	70679932	70680432	chr11	70812561	70812562	0.83643
chr11	70683583	70684083	chr11	70812561	70812562	0.84479
chr11	70812335	70812835	chr11	70812561	70812562	0.70522
chr11	72458194	72458694	chr11	72301629	72301630	0.523082
chr11	72538044	72538544	chr11	72301629	72301630	0.529832
chr11	72550068	72550568	chr11	72301629	72301630	0.690977
chr11	72458194	72458694	chr11	72489920	72489921	0.720638
chr11	72946261	72946761	chr11	72999145	72999146	0.611396
chr11	72953748	72954248	chr11	72999145	72999146	0.74471
chr11	72960899	72961399	chr11	72999145	72999146	0.588692
chr11	73024410	73024910	chr11	72999145	72999146	0.836015
chr11	74524088	74524588	chr11	74610915	74610916	0.570933
chr11	74572532	74573032	chr11	74610915	74610916	0.739625
chr11	74575853	74576353	chr11	74610915	74610916	0.717263
chr11	74576874	74577374	chr11	74610915	74610916	0.666795
chr11	74647886	74648386	chr11	74610915	74610916	0.657978
chr11	75415081	75415581	chr11	75454717	75454718	0.50249
chr11	75415081	75415581	chr11	75531694	75531695	0.728476
chr11	75458596	75459096	chr11	75531694	75531695	0.877536
chr11	75532944	75533444	chr11	75531694	75531695	0.717667
chr11	75541151	75541651	chr11	75531694	75531695	0.718353
chr11	75570686	75571186	chr11	75531694	75531695	0.744793
chr11	75571217	75571717	chr11	75531694	75531695	0.827297
chr11	75592540	75593040	chr11	75531694	75531695	0.52562
chr11	75644670	75645170	chr11	75531694	75531695	0.824737
chr11	75653293	75653793	chr11	75531694	75531695	0.667434
chr11	75659294	75659794	chr11	75531694	75531695	0.597048
chr11	75458596	75459096	chr11	75588079	75588080	0.539113
chr11	75571217	75571717	chr11	75588079	75588080	0.512411
chr11	75644670	75645170	chr11	75588079	75588080	0.533114
chr11	75653293	75653793	chr11	75588079	75588080	0.521528
chr11	76025121	76025621	chr11	76027782	76027783	0.588946
chr11	76033680	76034180	chr11	76027782	76027783	0.663562
chr11	76261137	76261637	chr11	76027782	76027783	0.746986
chr11	76456896	76457396	chr11	76577739	76577740	0.513401
chr11	76479041	76479541	chr11	76577739	76577740	0.683603
chr11	76479559	76480059	chr11	76577739	76577740	0.719318
chr11	76481861	76482361	chr11	76577739	76577740	0.592343
chr11	76482615	76483115	chr11	76577739	76577740	0.664617
chr11	76587218	76587718	chr11	76577739	76577740	0.599578
chr11	76587924	76588424	chr11	76577739	76577740	0.685655
chr11	76628664	76629164	chr11	76577739	76577740	0.515843
chr11	78982700	78983200	chr11	78984924	78984925	0.616905
chr11	79017243	79017743	chr11	78984924	78984925	0.50949
chr11	79023354	79023854	chr11	78984924	78984925	0.558046
chr11	79076405	79076905	chr11	78984924	78984925	0.619069
chr11	79088196	79088696	chr11	78984924	78984925	0.501492
chr11	79118753	79119253	chr11	78984924	78984925	0.510973
chr11	79528000	79528500	chr11	79530609	79530610	0.666287
chr11	79530345	79530845	chr11	79530609	79530610	0.626995
chr11	79652228	79652728	chr11	79530609	79530610	0.565026
chr11	79653318	79653818	chr11	79530609	79530610	0.557824
chr11	79658571	79659071	chr11	79530609	79530610	0.642229
chr11	79673649	79674149	chr11	79530609	79530610	0.521864
chr11	79287145	79287645	chr11	79530609	79530610	0.727681
chr11	79305567	79306067	chr11	79530609	79530610	0.691279
chr11	79526863	79527363	chr11	79530609	79530610	0.659432
chr11	79528000	79528500	chr11	79530609	79530610	0.706112
chr11	79530345	79530845	chr11	79530609	79530610	0.657584
chr11	79640827	79641327	chr11	79530609	79530610	0.661282
chr11	79653318	79653818	chr11	79530609	79530610	0.634658
chr11	79658571	79659071	chr11	79530609	79530610	0.613819
chr11	79669125	79669625	chr11	79530609	79530610	0.732436
chr11	79673649	79674149	chr11	79530609	79530610	0.565764
chr11	79674182	79674682	chr11	79530609	79530610	0.679831
chr11	82006721	82007221	chr11	82035577	82035578	0.798325
chr11	82016313	82016813	chr11	82035577	82035578	0.782899
chr11	82006721	82007221	chr11	82045712	82045713	0.83679
chr11	82016313	82016813	chr11	82045712	82045713	0.809895
chr11	82006721	82007221	chr11	82101845	82101846	0.845726
chr11	82016313	82016813	chr11	82101845	82101846	0.820911
chr11	82870473	82870973	chr11	82952102	82952103	0.503938
chr11	82952050	82952550	chr11	82952102	82952103	0.527919
chr11	83020488	83020988	chr11	82952102	82952103	0.503457
chr11	83116759	83117259	chr11	82952102	82952103	0.635311
chr11	83124887	83125387	chr11	82952102	82952103	0.65989
chr11	82952050	82952550	chr11	83020810	83020811	0.501721
chr11	83116759	83117259	chr11	83020810	83020811	0.656872
chr11	83124887	83125387	chr11	83020810	83020811	0.67958
chr11	82952050	82952550	chr11	83065112	83065113	0.533035
chr11	83116759	83117259	chr11	83065112	83065113	0.754568
chr11	83124887	83125387	chr11	83065112	83065113	0.795447
chr11	83116759	83117259	chr11	83116845	83116846	0.803925
chr11	83124887	83125387	chr11	83116845	83116846	0.878544
chr11	83116759	83117259	chr11	83175186	83175187	0.846773
chr11	83124887	83125387	chr11	83175186	83175187	0.938219
chr11	83426999	83427499	chr11	83437694	83437695	0.736418
chr11	83572136	83572636	chr11	83437694	83437695	0.828917
chr11	83638943	83639443	chr11	83437694	83437695	0.8165
chr11	83639458	83639958	chr11	83437694	83437695	0.872874
chr11	83640032	83640532	chr11	83437694	83437695	0.901069
chr11	83646614	83647114	chr11	83437694	83437695	0.850995
chr11	83648915	83649415	chr11	83437694	83437695	0.838801
chr11	83649575	83650075	chr11	83437694	83437695	0.91396
chr11	83662306	83662806	chr11	83437694	83437695	0.755231
chr11	83426999	83427499	chr11	83578636	83578637	0.732423
chr11	83572136	83572636	chr11	83578636	83578637	0.615684
chr11	83638943	83639443	chr11	83578636	83578637	0.86666
chr11	83639458	83639958	chr11	83578636	83578637	0.854105
chr11	83640032	83640532	chr11	83578636	83578637	0.873351
chr11	83646614	83647114	chr11	83578636	83578637	0.767193
chr11	83648915	83649415	chr11	83578636	83578637	0.896663
chr11	83649575	83650075	chr11	83578636	83578637	0.830082
chr11	83662306	83662806	chr11	83578636	83578637	0.880574
chr11	83743409	83743909	chr11	83578636	83578637	0.624652
chr11	83746198	83746698	chr11	83578636	83578637	0.539197
chr11	83746955	83747455	chr11	83578636	83578637	0.732045
chr11	83789186	83789686	chr11	83578636	83578637	0.780595
chr11	83426999	83427499	chr11	83593087	83593088	0.759328
chr11	83572136	83572636	chr11	83593087	83593088	0.659258
chr11	83638943	83639443	chr11	83593087	83593088	0.87923
chr11	83639458	83639958	chr11	83593087	83593088	0.882533
chr11	83640032	83640532	chr11	83593087	83593088	0.899398
chr11	83646614	83647114	chr11	83593087	83593088	0.807767
chr11	83648915	83649415	chr11	83593087	83593088	0.911107
chr11	83649575	83650075	chr11	83593087	83593088	0.870362
chr11	83662306	83662806	chr11	83593087	83593088	0.886073
chr11	83743409	83743909	chr11	83593087	83593088	0.670936
chr11	83746198	83746698	chr11	83593087	83593088	0.604087
chr11	83746955	83747455	chr11	83593087	83593088	0.773036
chr11	83789186	83789686	chr11	83593087	83593088	0.808012
chr11	83426999	83427499	chr11	83649378	83649379	0.743148
chr11	83572136	83572636	chr11	83649378	83649379	0.661962
chr11	83638943	83639443	chr11	83649378	83649379	0.858438
chr11	83639458	83639958	chr11	83649378	83649379	0.862035
chr11	83640032	83640532	chr11	83649378	83649379	0.888294
chr11	83646614	83647114	chr11	83649378	83649379	0.785188
chr11	83648915	83649415	chr11	83649378	83649379	0.896267
chr11	83649575	83650075	chr11	83649378	83649379	0.844168
chr11	83662306	83662806	chr11	83649378	83649379	0.861576
chr11	83743409	83743909	chr11	83649378	83649379	0.67105
chr11	83746198	83746698	chr11	83649378	83649379	0.600658
chr11	83746955	83747455	chr11	83649378	83649379	0.76145
chr11	83789186	83789686	chr11	83649378	83649379	0.797744
chr11	83426999	83427499	chr11	83662584	83662585	0.676209
chr11	83572136	83572636	chr11	83662584	83662585	0.55242
chr11	83638943	83639443	chr11	83662584	83662585	0.794503
chr11	83639458	83639958	chr11	83662584	83662585	0.783356
chr11	83640032	83640532	chr11	83662584	83662585	0.811215
chr11	83646614	83647114	chr11	83662584	83662585	0.693861
chr11	83648915	83649415	chr11	83662584	83662585	0.833324
chr11	83649575	83650075	chr11	83662584	83662585	0.751026
chr11	83662306	83662806	chr11	83662584	83662585	0.824255
chr11	83743409	83743909	chr11	83662584	83662585	0.554953
chr11	83746955	83747455	chr11	83662584	83662585	0.679823
chr11	83789186	83789686	chr11	83662584	83662585	0.742387
chr11	83638943	83639443	chr11	83704056	83704057	0.776273
chr11	83639458	83639958	chr11	83704056	83704057	0.743455
chr11	83640032	83640532	chr11	83704056	83704057	0.765836
chr11	83646614	83647114	chr11	83704056	83704057	0.648801
chr11	83648915	83649415	chr11	83704056	83704057	0.795636
chr11	83649575	83650075	chr11	83704056	83704057	0.704984
chr11	83662306	83662806	chr11	83704056	83704057	0.79979
chr11	83746955	83747455	chr11	83704056	83704057	0.622043
chr11	83789186	83789686	chr11	83704056	83704057	0.708453
chr11	83572136	83572636	chr11	83746940	83746941	0.773738
chr11	83638943	83639443	chr11	83746940	83746941	0.7679
chr11	83639458	83639958	chr11	83746940	83746941	0.843709
chr11	83640032	83640532	chr11	83746940	83746941	0.845682
chr11	83646614	83647114	chr11	83746940	83746941	0.805522
chr11	83648915	83649415	chr11	83746940	83746941	0.80743
chr11	83649575	83650075	chr11	83746940	83746941	0.851661
chr11	83662306	83662806	chr11	83746940	83746941	0.739948
chr11	83743409	83743909	chr11	83746940	83746941	0.77951
chr11	83746198	83746698	chr11	83746940	83746941	0.822118
chr11	83746955	83747455	chr11	83746940	83746941	0.762965
chr11	83789186	83789686	chr11	83746940	83746941	0.735408
chr11	86907847	86908347	chr11	86757492	86757493	0.659916
chr11	94589358	94589858	chr11	94392976	94392977	0.761588
chr11	95688358	95688858	chr11	95842476	95842477	0.503601
chr11	95713802	95714302	chr11	95842476	95842477	0.515038
chr11	95749500	95750000	chr11	95842476	95842477	0.502921
chr11	95688358	95688858	chr11	95842295	95842296	0.541804
chr11	95749500	95750000	chr11	95842295	95842296	0.665483
chr11	95805039	95805539	chr11	95842295	95842296	0.557937
chr11	95805577	95806077	chr11	95842295	95842296	0.54079
chr11	95834406	95834906	chr11	95842295	95842296	0.524652
chr11	97825183	97825683	chr11	97996173	97996174	0.790582
chr11	97826378	97826878	chr11	97996173	97996174	0.590376
chr11	97829366	97829866	chr11	97996173	97996174	0.79777
chr11	97829922	97830422	chr11	97996173	97996174	0.807577
chr11	97999218	97999718	chr11	97996173	97996174	0.576087
chr11	100626212	100626712	chr11	100704271	100704272	0.778341
chr11	100814395	100814895	chr11	100704271	100704272	0.736494
chr11	100814395	100814895	chr11	100738215	100738216	0.533788
chr11	100814395	100814895	chr11	101009452	101009453	0.589312
chr11	102429029	102429529	chr11	102430322	102430323	0.644503
chr11	102431989	102432489	chr11	102430322	102430323	0.77172
chr11	102432805	102433305	chr11	102430322	102430323	0.562958
chr11	103173624	103174124	chr11	103028562	103028563	0.50923
chr11	103174252	103174752	chr11	103028562	103028563	0.535784
chr11	103174855	103175355	chr11	103028562	103028563	0.509079
chr11	103178072	103178572	chr11	103028562	103028563	0.545646
chr11	103146379	103146879	chr11	103171138	103171139	0.56486
chr11	103170304	103170804	chr11	103171138	103171139	0.558857
chr11	103170820	103171320	chr11	103171138	103171139	0.758148
chr11	103172094	103172594	chr11	103171138	103171139	0.618579
chr11	103173624	103174124	chr11	103171138	103171139	0.812172
chr11	103174252	103174752	chr11	103171138	103171139	0.847898
chr11	103174855	103175355	chr11	103171138	103171139	0.946556
chr11	103175475	103175975	chr11	103171138	103171139	0.764759
chr11	103178072	103178572	chr11	103171138	103171139	0.958101
chr11	103197009	103197509	chr11	103171138	103171139	0.703235
chr11	103248823	103249323	chr11	103171138	103171139	0.58746
chr11	103249433	103249933	chr11	103171138	103171139	0.858397
chr11	103249936	103250436	chr11	103171138	103171139	0.708421
chr11	103258111	103258611	chr11	103171138	103171139	0.876454
chr11	103262349	103262849	chr11	103171138	103171139	0.610408
chr11	103344198	103344698	chr11	103171138	103171139	0.702487
chr11	103344898	103345398	chr11	103171138	103171139	0.766219
chr11	103403754	103404254	chr11	103171138	103171139	0.807715
chr11	103413114	103413614	chr11	103171138	103171139	0.648129
chr11	103363241	103363741	chr11	103363692	103363693	0.520633
chr11	106122596	106123096	chr11	106160729	106160730	0.510801
chr11	106158997	106159497	chr11	106160729	106160730	0.593022
chr11	106165286	106165786	chr11	106160729	106160730	0.515707
chr11	106387586	106388086	chr11	106160729	106160730	0.545776
chr11	106158997	106159497	chr11	106314562	106314563	0.724617
chr11	106387586	106388086	chr11	106314562	106314563	0.61935
chr11	106419472	106419972	chr11	106314562	106314563	0.768742
chr11	106564221	106564721	chr11	106314562	106314563	0.759142
chr11	106564221	106564721	chr11	106751226	106751227	0.538141
chr11	106819703	106820203	chr11	106751226	106751227	0.604414
chr11	107417166	107417666	chr11	107470720	107470721	0.569128
chr11	114653649	114654149	chr11	114890041	114890042	0.755527
chr11	114702506	114703006	chr11	114890041	114890042	0.633028
chr11	114879611	114880111	chr11	114890041	114890042	0.740559
chr11	114883210	114883710	chr11	114890041	114890042	0.602285
chr11	114890083	114890583	chr11	114890041	114890042	0.786564
chr11	114897957	114898457	chr11	114890041	114890042	0.824478
chr11	114907518	114908018	chr11	114890041	114890042	0.790553
chr11	114908110	114908610	chr11	114890041	114890042	0.776608
chr11	114912744	114913244	chr11	114890041	114890042	0.577094
chr11	114917014	114917514	chr11	114890041	114890042	0.689094
chr11	114927019	114927519	chr11	114890041	114890042	0.600246
chr11	114930984	114931484	chr11	114890041	114890042	0.641443
chr11	114934190	114934690	chr11	114890041	114890042	0.588162
chr11	114965359	114965859	chr11	114890041	114890042	0.699219
chr11	114968748	114969248	chr11	114890041	114890042	0.883169
chr11	114989687	114990187	chr11	114890041	114890042	0.62121
chr11	115001436	115001936	chr11	114890041	114890042	0.870921
chr11	115004064	115004564	chr11	114890041	114890042	0.830414
chr11	115119344	115119844	chr11	114890041	114890042	0.672646
chr11	115133722	115134222	chr11	114890041	114890042	0.728398
chr11	115138888	115139388	chr11	114890041	114890042	0.867841
chr11	114879611	114880111	chr11	114989886	114989887	0.733381
chr11	114883210	114883710	chr11	114989886	114989887	0.573818
chr11	114890083	114890583	chr11	114989886	114989887	0.768993
chr11	114897957	114898457	chr11	114989886	114989887	0.819196
chr11	114907518	114908018	chr11	114989886	114989887	0.769032
chr11	114908110	114908610	chr11	114989886	114989887	0.773033
chr11	114912744	114913244	chr11	114989886	114989887	0.565372
chr11	114917014	114917514	chr11	114989886	114989887	0.668993
chr11	114927019	114927519	chr11	114989886	114989887	0.578665
chr11	114930984	114931484	chr11	114989886	114989887	0.624886
chr11	114934190	114934690	chr11	114989886	114989887	0.570756
chr11	114965359	114965859	chr11	114989886	114989887	0.689139
chr11	114968748	114969248	chr11	114989886	114989887	0.883612
chr11	114989687	114990187	chr11	114989886	114989887	0.604277
chr11	115001436	115001936	chr11	114989886	114989887	0.864782
chr11	115004064	115004564	chr11	114989886	114989887	0.819457
chr11	115119344	115119844	chr11	114989886	114989887	0.659902
chr11	115133722	115134222	chr11	114989886	114989887	0.709756
chr11	115138888	115139388	chr11	114989886	114989887	0.859932
chr11	115141855	115142355	chr11	114989886	114989887	0.605306
chr11	115153822	115154322	chr11	114989886	114989887	0.679466
chr11	115172739	115173239	chr11	114989886	114989887	0.687566
chr11	115173499	115173999	chr11	114989886	114989887	0.6448
chr11	115188660	115189160	chr11	114989886	114989887	0.789667
chr11	115189203	115189703	chr11	114989886	114989887	0.835578
chr11	115190350	115190850	chr11	114989886	114989887	0.650183
chr11	115191958	115192458	chr11	114989886	114989887	0.612805
chr11	114879611	114880111	chr11	115001880	115001881	0.727728
chr11	114883210	114883710	chr11	115001880	115001881	0.597606
chr11	114890083	114890583	chr11	115001880	115001881	0.785179
chr11	114897957	114898457	chr11	115001880	115001881	0.817354
chr11	114907518	114908018	chr11	115001880	115001881	0.785241
chr11	114908110	114908610	chr11	115001880	115001881	0.766962
chr11	114912744	114913244	chr11	115001880	115001881	0.581649
chr11	114917014	114917514	chr11	115001880	115001881	0.691441
chr11	114927019	114927519	chr11	115001880	115001881	0.595152
chr11	114930984	114931484	chr11	115001880	115001881	0.64117
chr11	114934190	114934690	chr11	115001880	115001881	0.594065
chr11	114965359	114965859	chr11	115001880	115001881	0.697247
chr11	114968748	114969248	chr11	115001880	115001881	0.875282
chr11	114989687	114990187	chr11	115001880	115001881	0.615599
chr11	115001436	115001936	chr11	115001880	115001881	0.868427
chr11	115004064	115004564	chr11	115001880	115001881	0.823692
chr11	115119344	115119844	chr11	115001880	115001881	0.675185
chr11	115133722	115134222	chr11	115001880	115001881	0.72927
chr11	115138888	115139388	chr11	115001880	115001881	0.856233
chr11	115141855	115142355	chr11	115001880	115001881	0.609583
chr11	115153822	115154322	chr11	115001880	115001881	0.696215
chr11	115172739	115173239	chr11	115001880	115001881	0.684519
chr11	115173499	115173999	chr11	115001880	115001881	0.666811
chr11	115188660	115189160	chr11	115001880	115001881	0.80547
chr11	115189203	115189703	chr11	115001880	115001881	0.835846
chr11	115190350	115190850	chr11	115001880	115001881	0.663851
chr11	115191958	115192458	chr11	115001880	115001881	0.622946
chr11	114879611	114880111	chr11	115091431	115091432	0.70518
chr11	114883210	114883710	chr11	115091431	115091432	0.767598
chr11	114890083	114890583	chr11	115091431	115091432	0.771539
chr11	114897957	114898457	chr11	115091431	115091432	0.685506
chr11	114907518	114908018	chr11	115091431	115091432	0.836807
chr11	114908110	114908610	chr11	115091431	115091432	0.625977
chr11	114912744	114913244	chr11	115091431	115091432	0.608695
chr11	114917014	114917514	chr11	115091431	115091432	0.817046
chr11	114927019	114927519	chr11	115091431	115091432	0.726791
chr11	114930984	114931484	chr11	115091431	115091432	0.747541
chr11	114934190	114934690	chr11	115091431	115091432	0.696906
chr11	114965359	114965859	chr11	115091431	115091432	0.622428
chr11	114968748	114969248	chr11	115091431	115091432	0.692927
chr11	114989687	114990187	chr11	115091431	115091432	0.706324
chr11	115001436	115001936	chr11	115091431	115091432	0.699221
chr11	115004064	115004564	chr11	115091431	115091432	0.795772
chr11	115119344	115119844	chr11	115091431	115091432	0.767575
chr11	115133722	115134222	chr11	115091431	115091432	0.813525
chr11	115138888	115139388	chr11	115091431	115091432	0.780351
chr11	115141855	115142355	chr11	115091431	115091432	0.626853
chr11	115153822	115154322	chr11	115091431	115091432	0.735666
chr11	115172739	115173239	chr11	115091431	115091432	0.568634
chr11	115173499	115173999	chr11	115091431	115091432	0.764496
chr11	115188660	115189160	chr11	115091431	115091432	0.861182
chr11	115189203	115189703	chr11	115091431	115091432	0.793281
chr11	115190350	115190850	chr11	115091431	115091432	0.739496
chr11	115191958	115192458	chr11	115091431	115091432	0.594099
chr11	114890083	114890583	chr11	115133992	115133993	0.700132
chr11	114897957	114898457	chr11	115133992	115133993	0.679019
chr11	114907518	114908018	chr11	115133992	115133993	0.873685
chr11	114908110	114908610	chr11	115133992	115133993	0.714317
chr11	114912744	114913244	chr11	115133992	115133993	0.621913
chr11	114917014	114917514	chr11	115133992	115133993	0.918386
chr11	114927019	114927519	chr11	115133992	115133993	0.810858
chr11	114930984	114931484	chr11	115133992	115133993	0.819213
chr11	114934190	114934690	chr11	115133992	115133993	0.764724
chr11	114965359	114965859	chr11	115133992	115133993	0.646969
chr11	114968748	114969248	chr11	115133992	115133993	0.754711
chr11	114989687	114990187	chr11	115133992	115133993	0.795446
chr11	115001436	115001936	chr11	115133992	115133993	0.619961
chr11	115004064	115004564	chr11	115133992	115133993	0.876474
chr11	115119344	115119844	chr11	115133992	115133993	0.879785
chr11	115133722	115134222	chr11	115133992	115133993	0.916195
chr11	115138888	115139388	chr11	115133992	115133993	0.840001
chr11	115141855	115142355	chr11	115133992	115133993	0.67606
chr11	115153822	115154322	chr11	115133992	115133993	0.737176
chr11	115172739	115173239	chr11	115133992	115133993	0.580571
chr11	115173499	115173999	chr11	115133992	115133993	0.763547
chr11	115188660	115189160	chr11	115133992	115133993	0.892928
chr11	115189203	115189703	chr11	115133992	115133993	0.824516
chr11	115190350	115190850	chr11	115133992	115133993	0.791638
chr11	115191958	115192458	chr11	115133992	115133993	0.542657
chr11	114917014	114917514	chr11	115163341	115163342	0.533605
chr11	114968748	114969248	chr11	115163341	115163342	0.558569
chr11	115004064	115004564	chr11	115163341	115163342	0.590131
chr11	115133722	115134222	chr11	115163341	115163342	0.554468
chr11	115138888	115139388	chr11	115163341	115163342	0.529396
chr11	115153822	115154322	chr11	115163341	115163342	0.696441
chr11	115188660	115189160	chr11	115163341	115163342	0.553033
chr11	115189203	115189703	chr11	115163341	115163342	0.540891
chr11	114965359	114965859	chr11	115187487	115187488	0.589621
chr11	114968748	114969248	chr11	115187487	115187488	0.755233
chr11	115001436	115001936	chr11	115187487	115187488	0.811387
chr11	115004064	115004564	chr11	115187487	115187488	0.599428
chr11	115138888	115139388	chr11	115187487	115187488	0.677838
chr11	115153822	115154322	chr11	115187487	115187488	0.51419
chr11	115172739	115173239	chr11	115187487	115187488	0.592402
chr11	115188660	115189160	chr11	115187487	115187488	0.559695
chr11	115189203	115189703	chr11	115187487	115187488	0.644111
chr11	115191958	115192458	chr11	115187487	115187488	0.511705
chr11	114968748	114969248	chr11	115187316	115187317	0.534469
chr11	115001436	115001936	chr11	115187316	115187317	0.533245
chr11	115902764	115903264	chr11	115900139	115900140	0.624123
chr11	116077384	116077884	chr11	115900139	115900140	0.811794
chr11	116077384	116077884	chr11	116077961	116077962	0.557193
chr11	116436725	116437225	chr11	116199045	116199046	0.521421
chr11	116616002	116616502	chr11	116627019	116627020	0.524384
chr11	117768973	117769473	chr11	117809667	117809668	0.522828
chr11	117782047	117782547	chr11	117809667	117809668	0.627921
chr11	117792186	117792686	chr11	117809667	117809668	0.5954
chr11	117832009	117832509	chr11	117809667	117809668	0.67035
chr11	117946305	117946805	chr11	117809667	117809668	0.515395
chr11	117959866	117960366	chr11	117809667	117809668	0.616834
chr11	117976024	117976524	chr11	117809667	117809668	0.614873
chr11	117991689	117992189	chr11	117809667	117809668	0.750892
chr11	117993165	117993665	chr11	117809667	117809668	0.544631
chr11	117782047	117782547	chr11	117986857	117986858	0.526232
chr11	117792186	117792686	chr11	117986857	117986858	0.63529
chr11	117832009	117832509	chr11	117986857	117986858	0.667521
chr11	118145620	118146120	chr11	117986857	117986858	0.501607
chr11	118152961	118153461	chr11	118401931	118401932	0.662325
chr11	118211658	118212158	chr11	118401931	118401932	0.667159
chr11	118212700	118213200	chr11	118401931	118401932	0.62325
chr11	118234850	118235350	chr11	118401931	118401932	0.676524
chr11	118275043	118275543	chr11	118401931	118401932	0.683592
chr11	118456929	118457429	chr11	118401931	118401932	0.565607
chr11	119856660	119857160	chr11	120047145	120047146	0.604355
chr11	119863233	119863733	chr11	120047145	120047146	0.57598
chr11	119875608	119876108	chr11	120047145	120047146	0.663656
chr11	119925169	119925669	chr11	120047145	120047146	0.534871
chr11	120034792	120035292	chr11	120047145	120047146	0.651413
chr11	120041773	120042273	chr11	120047145	120047146	0.55286
chr11	120063867	120064367	chr11	120047145	120047146	0.630396
chr11	120150260	120150760	chr11	120047145	120047146	0.515396
chr11	120158811	120159311	chr11	120047145	120047146	0.66978
chr11	120209255	120209755	chr11	120047145	120047146	0.530221
chr11	120218870	120219370	chr11	120047145	120047146	0.684291
chr11	120268512	120269012	chr11	120047145	120047146	0.512304
chr11	120938786	120939286	chr11	120727281	120727282	0.54341
chr11	120957567	120958067	chr11	120727281	120727282	0.561581
chr11	120938786	120939286	chr11	120732021	120732022	0.565244
chr11	120957567	120958067	chr11	120732021	120732022	0.595912
chr11	121741367	121741867	chr11	121702427	121702428	0.638395
chr11	121747993	121748493	chr11	121702427	121702428	0.551035
chr11	121804605	121805105	chr11	121702427	121702428	0.665843
chr12	31996757	31997257	chr12	32208649	32208650	0.745853
chr12	32017556	32018056	chr12	32208649	32208650	0.807227
chr12	32208275	32208775	chr12	32208649	32208650	0.816155
chr12	32292748	32293248	chr12	32208649	32208650	0.613026
chr12	32952368	32952868	chr12	32820335	32820336	0.541692
chr12	33158161	33158661	chr12	32953945	32953946	0.51322
chr12	33169975	33170475	chr12	33147686	33147687	0.636119
chr12	33315103	33315603	chr12	33147686	33147687	0.648299
chr12	33316139	33316639	chr12	33147686	33147687	0.570274
chr12	54999000	54999500	chr12	54986336	54986337	0.805617
chr12	70102324	70102824	chr12	70227683	70227684	0.772155
chr12	70110127	70110627	chr12	70227683	70227684	0.604111
chr12	70219131	70219631	chr12	70227683	70227684	0.737238
chr12	70221379	70221879	chr12	70227683	70227684	0.759077
chr12	70225458	70225958	chr12	70227683	70227684	0.656942
chr12	70226918	70227418	chr12	70227683	70227684	0.62656
chr12	70227523	70228023	chr12	70227683	70227684	0.659196
chr12	70233557	70234057	chr12	70227683	70227684	0.819074
chr12	70238454	70238954	chr12	70227683	70227684	0.674796
chr12	73610708	73611208	chr12	73584796	73584797	0.52291
chr12	73617588	73618088	chr12	73584796	73584797	0.655197
chr12	79131956	79132456	chr12	79208913	79208914	0.751185
chr12	79253190	79253690	chr12	79208913	79208914	0.752144
chr12	79320851	79321351	chr12	79208913	79208914	0.678517
chr12	83885051	83885551	chr12	83950608	83950609	0.516489
chr12	84751937	84752437	chr12	84773112	84773113	0.561783
chr12	84762660	84763160	chr12	84773112	84773113	0.566564
chr12	85629598	85630098	chr12	85599105	85599106	0.513125
chr12	85468602	85469102	chr12	85686720	85686721	0.858318
chr12	85489301	85489801	chr12	85686720	85686721	0.638179
chr12	85545746	85546246	chr12	85686720	85686721	0.532263
chr12	85569711	85570211	chr12	85686720	85686721	0.758307
chr12	85597964	85598464	chr12	85686720	85686721	0.739262
chr12	85629598	85630098	chr12	85686720	85686721	0.775263
chr12	85686430	85686930	chr12	85686720	85686721	0.587486
chr12	85687055	85687555	chr12	85686720	85686721	0.630345
chr12	85704494	85704994	chr12	85686720	85686721	0.526847
chr12	85710537	85711037	chr12	85686720	85686721	0.890465
chr12	98282661	98283161	chr12	98268635	98268636	0.520668
chr12	98283253	98283753	chr12	98268635	98268636	0.647031
chr12	102354419	102354919	chr12	102439697	102439698	0.636199
chr12	102365103	102365603	chr12	102439697	102439698	0.522687
chr12	102367974	102368474	chr12	102439697	102439698	0.632729
chr12	102445410	102445910	chr12	102439697	102439698	0.560528
chr12	102645929	102646429	chr12	102439697	102439698	0.565526
chr12	102646484	102646984	chr12	102439697	102439698	0.545543
chr12	102647025	102647525	chr12	102439697	102439698	0.558899
chr12	102647025	102647525	chr12	102743712	102743713	0.525034
chr12	102690131	102690631	chr12	102743712	102743713	0.551494
chr12	103341118	103341618	chr12	103443680	103443681	0.594036
chr12	103343432	103343932	chr12	103443680	103443681	0.547283
chr12	111432094	111432594	chr12	111442661	111442662	0.758573
chr12	111432853	111433353	chr12	111442661	111442662	0.598643
chr12	111437482	111437982	chr12	111442661	111442662	0.755478
chr12	111441569	111442069	chr12	111442661	111442662	0.827162
chr12	111442344	111442844	chr12	111442661	111442662	0.760642
chr12	111444113	111444613	chr12	111442661	111442662	0.578566
chr12	111455900	111456400	chr12	111442661	111442662	0.592296
chr12	111524867	111525367	chr12	111442661	111442662	0.750223
chr12	111559626	111560126	chr12	111442661	111442662	0.598258
chr12	112617176	112617676	chr12	112620047	112620048	0.758357
chr12	112619733	112620233	chr12	112620047	112620048	0.643787
chr12	112628002	112628502	chr12	112620047	112620048	0.507537
chr12	112629218	112629718	chr12	112620047	112620048	0.917188
chr12	112632888	112633388	chr12	112620047	112620048	0.901302
chr12	112667970	112668470	chr12	112620047	112620048	0.696765
chr12	112688279	112688779	chr12	112620047	112620048	0.930629
chr12	112760446	112760946	chr12	112620047	112620048	0.522528
chr12	112761906	112762406	chr12	112620047	112620048	0.50949
chr12	112859908	112860408	chr12	112620047	112620048	0.70493
chr12	112860694	112861194	chr12	112620047	112620048	0.774084
chr12	112863442	112863942	chr12	112620047	112620048	0.523454
chr12	112864774	112865274	chr12	112620047	112620048	0.855319
chr12	112866463	112866963	chr12	112620047	112620048	0.524527
chr12	112866967	112867467	chr12	112620047	112620048	0.82167
chr12	112617176	112617676	chr12	112760655	112760656	0.80124
chr12	112619733	112620233	chr12	112760655	112760656	0.64973
chr12	112628002	112628502	chr12	112760655	112760656	0.697774
chr12	112629218	112629718	chr12	112760655	112760656	0.864111
chr12	112632888	112633388	chr12	112760655	112760656	0.78677
chr12	112667970	112668470	chr12	112760655	112760656	0.723956
chr12	112688279	112688779	chr12	112760655	112760656	0.757577
chr12	112702208	112702708	chr12	112760655	112760656	0.586917
chr12	112760446	112760946	chr12	112760655	112760656	0.761198
chr12	112761402	112761902	chr12	112760655	112760656	0.744153
chr12	112761906	112762406	chr12	112760655	112760656	0.819445
chr12	112859908	112860408	chr12	112760655	112760656	0.86806
chr12	112860694	112861194	chr12	112760655	112760656	0.864748
chr12	112863442	112863942	chr12	112760655	112760656	0.621957
chr12	112864774	112865274	chr12	112760655	112760656	0.820076
chr12	112866463	112866963	chr12	112760655	112760656	0.752413
chr12	112866967	112867467	chr12	112760655	112760656	0.86612
chr12	112917387	112917887	chr12	112760655	112760656	0.643198
chr13	9093578	9094078	chr13	9093881	9093882	0.517578
chr13	13523743	13524243	chr13	13393624	13393625	0.524093
chr13	13529100	13529600	chr13	13393624	13393625	0.50773
chr13	13523743	13524243	chr13	13590409	13590410	0.649107
chr13	13525797	13526297	chr13	13590409	13590410	0.572427
chr13	13529100	13529600	chr13	13590409	13590410	0.6445
chr13	13558846	13559346	chr13	13590409	13590410	0.565534
chr13	19828020	19828520	chr13	19824257	19824258	0.544421
chr13	19854910	19855410	chr13	19824257	19824258	0.83605
chr13	19921277	19921777	chr13	19824257	19824258	0.58293
chr13	20091237	20091737	chr13	20090507	20090508	0.59213
chr13	20092295	20092795	chr13	20090507	20090508	0.567629
chr13	20093325	20093825	chr13	20090507	20090508	0.581007
chr13	20111275	20111775	chr13	20090507	20090508	0.544553
chr13	20184979	20185479	chr13	20090507	20090508	0.538789
chr13	20786891	20787391	chr13	20794113	20794114	0.646266
chr13	31004395	31004895	chr13	30974047	30974048	0.570661
chr13	31004927	31005427	chr13	30974047	30974048	0.606207
chr13	40921270	40921770	chr13	41016250	41016251	0.525507
chr13	41828345	41828845	chr13	41847616	41847617	0.900419
chr13	43765220	43765720	chr13	43785112	43785113	0.807286
chr13	43767784	43768284	chr13	43785112	43785113	0.730912
chr13	43774102	43774602	chr13	43785112	43785113	0.559253
chr13	43776838	43777338	chr13	43785112	43785113	0.744252
chr13	43777536	43778036	chr13	43785112	43785113	0.508683
chr13	43778129	43778629	chr13	43785112	43785113	0.604152
chr13	49187818	49188318	chr13	49187547	49187548	0.570212
chr13	49309028	49309528	chr13	49187547	49187548	0.501992
chr13	49196786	49197286	chr13	49320311	49320312	0.950208
chr13	49199829	49200329	chr13	49320311	49320312	0.792267
chr13	49200637	49201137	chr13	49320311	49320312	0.907688
chr13	49205666	49206166	chr13	49320311	49320312	0.519276
chr13	49213495	49213995	chr13	49320311	49320312	0.550239
chr13	49242011	49242511	chr13	49320311	49320312	0.812007
chr13	49242655	49243155	chr13	49320311	49320312	0.881058
chr13	49243253	49243753	chr13	49320311	49320312	0.573689
chr13	49272074	49272574	chr13	49320311	49320312	0.882935
chr13	49298298	49298798	chr13	49320311	49320312	0.721771
chr13	49300688	49301188	chr13	49320311	49320312	0.724426
chr13	49306675	49307175	chr13	49320311	49320312	0.630769
chr13	49309028	49309528	chr13	49320311	49320312	0.882239
chr13	51733962	51734462	chr13	51793747	51793748	0.532082
chr13	51734488	51734988	chr13	51793747	51793748	0.56982
chr13	51739683	51740183	chr13	51793747	51793748	0.562381
chr13	51740680	51741180	chr13	51793747	51793748	0.558763
chr13	51754148	51754648	chr13	51793747	51793748	0.51626
chr13	51792100	51792600	chr13	51793747	51793748	0.546052
chr13	52571892	52572392	chr13	52583437	52583438	0.799436
chr13	52572419	52572919	chr13	52583437	52583438	0.723202
chr13	52582639	52583139	chr13	52583437	52583438	0.688813
chr13	52596861	52597361	chr13	52583437	52583438	0.617453
chr13	52610524	52611024	chr13	52583437	52583438	0.80194
chr13	52614671	52615171	chr13	52583437	52583438	0.769068
chr13	52619429	52619929	chr13	52583437	52583438	0.62817
chr13	52636317	52636817	chr13	52583437	52583438	0.807223
chr13	52793512	52794012	chr13	52583437	52583438	0.64614
chr13	55020875	55021375	chr13	55021385	55021386	0.800567
chr13	55369203	55369703	chr13	55369732	55369733	0.798651
chr13	55369725	55370225	chr13	55369732	55369733	0.733028
chr13	55429172	55429672	chr13	55369732	55369733	0.692596
chr13	55447573	55448073	chr13	55369732	55369733	0.761172
chr13	55449632	55450132	chr13	55369732	55369733	0.66796
chr13	55465815	55466315	chr13	55369732	55369733	0.554626
chr13	55528327	55528827	chr13	55369732	55369733	0.699922
chr13	55529583	55530083	chr13	55369732	55369733	0.556192
chr13	55369203	55369703	chr13	55528556	55528557	0.884575
chr13	55369725	55370225	chr13	55528556	55528557	0.779417
chr13	55429172	55429672	chr13	55528556	55528557	0.788814
chr13	55447573	55448073	chr13	55528556	55528557	0.909452
chr13	55449632	55450132	chr13	55528556	55528557	0.783297
chr13	55465815	55466315	chr13	55528556	55528557	0.644099
chr13	55528327	55528827	chr13	55528556	55528557	0.815276
chr13	55529058	55529558	chr13	55528556	55528557	0.549189
chr13	55529583	55530083	chr13	55528556	55528557	0.661219
chr13	56178476	56178976	chr13	56178885	56178886	0.663811
chr13	56181506	56182006	chr13	56178885	56178886	0.821126
chr13	56183337	56183837	chr13	56178885	56178886	0.699279
chr13	56334884	56335384	chr13	56178885	56178886	0.61559
chr13	56352372	56352872	chr13	56178885	56178886	0.712681
chr13	56353192	56353692	chr13	56178885	56178886	0.783312
chr13	60936387	60936887	chr13	60936625	60936626	0.796221
chr13	75789045	75789545	chr13	75839886	75839887	0.593147
chr13	75794211	75794711	chr13	75839886	75839887	0.691942
chr13	75823163	75823663	chr13	75839886	75839887	0.741212
chr13	75824574	75825074	chr13	75839886	75839887	0.757103
chr13	75845772	75846272	chr13	75839886	75839887	0.717393
chr13	76579431	76579931	chr13	76384961	76384962	0.672934
chr13	76620475	76620975	chr13	76384961	76384962	0.697678
chr13	97187524	97188024	chr13	97198357	97198358	0.818915
chr13	100183047	100183547	chr13	100202122	100202123	0.910491
chr13	100201689	100202189	chr13	100202122	100202123	0.794175
chr13	100183047	100183547	chr13	100247336	100247337	0.642157
chr13	105299855	105300355	chr13	105294818	105294819	0.533383
chr13	108267762	108268262	chr13	108214404	108214405	0.819615
chr13	110356709	110357209	chr13	110357172	110357173	0.92071
chr13	110363362	110363862	chr13	110357172	110357173	0.876534
chr13	110568473	110568973	chr13	110357172	110357173	0.891168
chr13	110569056	110569556	chr13	110357172	110357173	0.881959
chr13	117036231	117036731	chr13	117220573	117220574	0.684976
chr13	117195917	117196417	chr13	117220573	117220574	0.650329
chr13	117211364	117211864	chr13	117220573	117220574	0.712294
chr13	117220911	117221411	chr13	117220573	117220574	0.718585
chr13	117235473	117235973	chr13	117220573	117220574	0.703263
chr14	30553153	30553653	chr14	30549131	30549132	0.63361
chr14	30617263	30617763	chr14	30549131	30549132	0.568373
chr14	30693577	30694077	chr14	30549131	30549132	0.599066
chr14	30553153	30553653	chr14	30626208	30626209	0.605717
chr14	30619904	30620404	chr14	30626208	30626209	0.742044
chr14	30641765	30642265	chr14	30626208	30626209	0.720053
chr14	30693577	30694077	chr14	30626208	30626209	0.538521
chr14	30944210	30944710	chr14	31168641	31168642	0.589622
chr14	31160398	31160898	chr14	31168641	31168642	0.826411
chr14	31166372	31166872	chr14	31168641	31168642	0.531884
chr14	31188941	31189441	chr14	31168641	31168642	0.784981
chr14	31389779	31390279	chr14	31168641	31168642	0.640134
chr14	31392742	31393242	chr14	31168641	31168642	0.837405
chr14	31406089	31406589	chr14	31168641	31168642	0.583561
chr14	31407783	31408283	chr14	31168641	31168642	0.539665
chr14	31413598	31414098	chr14	31168641	31168642	0.66173
chr14	31389779	31390279	chr14	31494977	31494978	0.515744
chr14	31392742	31393242	chr14	31494977	31494978	0.504173
chr14	31422352	31422852	chr14	31494977	31494978	0.52041
chr14	33185185	33185685	chr14	33185066	33185067	0.953089
chr14	33194102	33194602	chr14	33185066	33185067	0.825644
chr14	33231993	33232493	chr14	33185066	33185067	0.649513
chr14	33247596	33248096	chr14	33185066	33185067	0.778195
chr14	44091449	44091949	chr14	44102654	44102655	0.834144
chr14	44891268	44891768	chr14	44988111	44988112	0.624944
chr14	44987964	44988464	chr14	44988111	44988112	0.684041
chr14	45041190	45041690	chr14	44988111	44988112	0.620164
chr14	45155514	45156014	chr14	44988111	44988112	0.68114
chr14	47187919	47188419	chr14	47189402	47189403	0.523297
chr14	47361904	47362404	chr14	47189402	47189403	0.535298
chr14	47373629	47374129	chr14	47189402	47189403	0.602563
chr14	47374218	47374718	chr14	47189402	47189403	0.631616
chr14	47187919	47188419	chr14	47373860	47373861	0.663255
chr14	47361904	47362404	chr14	47373860	47373861	0.731859
chr14	47373629	47374129	chr14	47373860	47373861	0.711314
chr14	47374218	47374718	chr14	47373860	47373861	0.795403
chr14	50833971	50834471	chr14	50870554	50870555	0.699341
chr14	50833971	50834471	chr14	50944303	50944304	0.645645
chr14	54222434	54222934	chr14	54417702	54417703	0.697772
chr14	54227331	54227831	chr14	54417702	54417703	0.714346
chr14	54409761	54410261	chr14	54417702	54417703	0.576906
chr14	54711920	54712420	chr14	54712174	54712175	0.748887
chr14	55590039	55590539	chr14	55765962	55765963	0.579498
chr14	55728430	55728930	chr14	55765962	55765963	0.527056
chr14	55764127	55764627	chr14	55765962	55765963	0.690101
chr14	55765707	55766207	chr14	55765962	55765963	0.702235
chr14	59556746	59557246	chr14	59341330	59341331	0.52917
chr14	60269294	60269794	chr14	60378286	60378287	0.584088
chr14	60273571	60274071	chr14	60378286	60378287	0.670679
chr14	60384139	60384639	chr14	60378286	60378287	0.742843
chr14	60422808	60423308	chr14	60378286	60378287	0.702212
chr14	60431779	60432279	chr14	60378286	60378287	0.536542
chr14	61309528	61310028	chr14	61309753	61309754	0.840722
chr14	61310186	61310686	chr14	61309753	61309754	0.716362
chr14	61518763	61519263	chr14	61309753	61309754	0.693658
chr14	64433995	64434495	chr14	64455903	64455904	0.676391
chr14	64792552	64793052	chr14	64950045	64950046	0.567377
chr14	69853794	69854294	chr14	70100145	70100146	0.650133
chr14	70022295	70022795	chr14	70100145	70100146	0.539585
chr14	70024547	70025047	chr14	70100145	70100146	0.755445
chr14	70051552	70052052	chr14	70100145	70100146	0.707399
chr14	70054185	70054685	chr14	70100145	70100146	0.769483
chr14	70056328	70056828	chr14	70100145	70100146	0.715343
chr14	70056839	70057339	chr14	70100145	70100146	0.795979
chr14	70061579	70062079	chr14	70100145	70100146	0.578989
chr14	70065797	70066297	chr14	70100145	70100146	0.791609
chr14	70066341	70066841	chr14	70100145	70100146	0.779885
chr14	70067803	70068303	chr14	70100145	70100146	0.54038
chr14	70069359	70069859	chr14	70100145	70100146	0.676142
chr14	70100603	70101103	chr14	70100145	70100146	0.53286
chr14	70101173	70101673	chr14	70100145	70100146	0.547321
chr14	70133400	70133900	chr14	70100145	70100146	0.577312
chr14	70175159	70175659	chr14	70100145	70100146	0.739121
chr14	70175681	70176181	chr14	70100145	70100146	0.655599
chr14	70333590	70334090	chr14	70100145	70100146	0.686828
chr14	70781219	70781719	chr14	70774381	70774382	0.59575
chr14	73138479	73138979	chr14	73237891	73237892	0.588265
chr14	73441974	73442474	chr14	73237891	73237892	0.627517
chr14	73138479	73138979	chr14	73385271	73385272	0.548316
chr14	73441974	73442474	chr14	73385271	73385272	0.554469
chr14	75032030	75032530	chr14	75131123	75131124	0.869496
chr14	75034085	75034585	chr14	75131123	75131124	0.893173
chr14	75056902	75057402	chr14	75131123	75131124	0.871417
chr14	75068401	75068901	chr14	75131123	75131124	0.762678
chr14	75069247	75069747	chr14	75131123	75131124	0.898493
chr14	75136480	75136980	chr14	75131123	75131124	0.794408
chr14	75174694	75175194	chr14	75131123	75131124	0.784871
chr14	75175702	75176202	chr14	75131123	75131124	0.699801
chr14	75176641	75177141	chr14	75131123	75131124	0.835878
chr14	75178478	75178978	chr14	75131123	75131124	0.813407
chr14	75179232	75179732	chr14	75131123	75131124	0.922303
chr14	75179880	75180380	chr14	75131123	75131124	0.71471
chr14	75180493	75180993	chr14	75131123	75131124	0.856115
chr14	75181471	75181971	chr14	75131123	75131124	0.670311
chr14	75182652	75183152	chr14	75131123	75131124	0.683315
chr14	75186085	75186585	chr14	75131123	75131124	0.846401
chr14	75186795	75187295	chr14	75131123	75131124	0.696982
chr14	75192773	75193273	chr14	75131123	75131124	0.863741
chr14	75195385	75195885	chr14	75131123	75131124	0.794174
chr14	77795202	77795702	chr14	77904239	77904240	0.567177
chr14	77825056	77825556	chr14	77904239	77904240	0.533342
chr14	79301345	79301845	chr14	79301635	79301636	0.645303
chr14	79301345	79301845	chr14	79481194	79481195	0.518479
chr14	79985152	79985652	chr14	80000302	80000303	0.762801
chr14	80000139	80000639	chr14	80000302	80000303	0.852426
chr14	102827980	102828480	chr14	102982637	102982638	0.573669
chr14	102835393	102835893	chr14	102982637	102982638	0.587742
chr14	102906710	102907210	chr14	102982637	102982638	0.566812
chr14	102907465	102907965	chr14	102982637	102982638	0.622139
chr14	102982621	102983121	chr14	102982637	102982638	0.585849
chr14	103007788	103008288	chr14	102982637	102982638	0.64832
chr14	103029231	103029731	chr14	102982637	102982638	0.544404
chr14	103033392	103033892	chr14	102982637	102982638	0.586028
chr14	103046792	103047292	chr14	102982637	102982638	0.506358
chr14	103048150	103048650	chr14	102982637	102982638	0.530538
chr14	103048697	103049197	chr14	102982637	102982638	0.542282
chr14	103058974	103059474	chr14	102982637	102982638	0.62414
chr14	102982621	102983121	chr14	103070216	103070217	0.500372
chr14	121996750	121997250	chr14	121965193	121965194	0.567595
chr14	122009452	122009952	chr14	121965193	121965194	0.57129
chr14	122013473	122013973	chr14	121965193	121965194	0.670673
chr14	122028924	122029424	chr14	121965193	121965194	0.778365
chr14	122029430	122029930	chr14	121965193	121965194	0.730931
chr14	122053223	122053723	chr14	121965193	121965194	0.563131
chr15	6554671	6555171	chr15	6579847	6579848	0.558792
chr15	6568936	6569436	chr15	6579847	6579848	0.551281
chr15	6569603	6570103	chr15	6579847	6579848	0.515463
chr15	6574495	6574995	chr15	6579847	6579848	0.793082
chr15	9463409	9463909	chr15	9529876	9529877	0.756838
chr15	25825717	25826217	chr15	25843298	25843299	0.521399
chr15	25827843	25828343	chr15	25843298	25843299	0.530068
chr15	25828375	25828875	chr15	25843298	25843299	0.681282
chr15	25830620	25831120	chr15	25843298	25843299	0.704741
chr15	25831276	25831776	chr15	25843298	25843299	0.649764
chr15	25834436	25834936	chr15	25843298	25843299	0.535103
chr15	25842937	25843437	chr15	25843298	25843299	0.675224
chr15	25843454	25843954	chr15	25843298	25843299	0.607583
chr15	25891468	25891968	chr15	25843298	25843299	0.585885
chr15	25940460	25940960	chr15	25843298	25843299	0.626658
chr15	25971524	25972024	chr15	25843298	25843299	0.591817
chr15	59004022	59004522	chr15	59082026	59082027	0.516288
chr15	59412603	59413103	chr15	59648654	59648655	0.651808
chr15	59520456	59520956	chr15	59648654	59648655	0.735986
chr15	59648405	59648905	chr15	59648654	59648655	0.606327
chr15	59648918	59649418	chr15	59648654	59648655	0.545423
chr15	59650450	59650950	chr15	59648654	59648655	0.740036
chr15	59651211	59651711	chr15	59648654	59648655	0.587592
chr15	59651732	59652232	chr15	59648654	59648655	0.512909
chr15	59652687	59653187	chr15	59648654	59648655	0.723768
chr15	59653316	59653816	chr15	59648654	59648655	0.549398
chr15	59654337	59654837	chr15	59648654	59648655	0.664233
chr15	59662546	59663046	chr15	59648654	59648655	0.667418
chr15	59706970	59707470	chr15	59648654	59648655	0.573338
chr15	59720970	59721470	chr15	59648654	59648655	0.660558
chr15	59721532	59722032	chr15	59648654	59648655	0.790513
chr15	59728072	59728572	chr15	59648654	59648655	0.518357
chr15	59728737	59729237	chr15	59648654	59648655	0.581736
chr15	59739146	59739646	chr15	59648654	59648655	0.792323
chr15	59773995	59774495	chr15	59648654	59648655	0.704367
chr15	59783825	59784325	chr15	59648654	59648655	0.660994
chr15	59785856	59786356	chr15	59648654	59648655	0.772641
chr15	59795614	59796114	chr15	59648654	59648655	0.784631
chr15	59807674	59808174	chr15	59648654	59648655	0.780492
chr15	64040633	64041133	chr15	64060448	64060449	0.558294
chr15	64041192	64041692	chr15	64060448	64060449	0.5889
chr15	64059034	64059534	chr15	64060448	64060449	0.649424
chr15	64059644	64060144	chr15	64060448	64060449	0.525517
chr15	64075503	64076003	chr15	64060448	64060449	0.621314
chr15	64100390	64100890	chr15	64060448	64060449	0.526362
chr15	66729410	66729910	chr15	66831829	66831830	0.592787
chr15	66812223	66812723	chr15	66831829	66831830	0.548429
chr15	66813885	66814385	chr15	66831829	66831830	0.687796
chr15	66816407	66816907	chr15	66831829	66831830	0.788127
chr15	67048514	67049014	chr15	66831829	66831830	0.831075
chr15	74930633	74931133	chr15	75111949	75111950	0.837347
chr15	74931621	74932121	chr15	75111949	75111950	0.895185
chr15	74962408	74962908	chr15	75111949	75111950	0.713612
chr15	74988523	74989023	chr15	75111949	75111950	0.634839
chr15	74989043	74989543	chr15	75111949	75111950	0.782766
chr15	74930633	74931133	chr15	75155261	75155262	0.682508
chr15	74931621	74932121	chr15	75155261	75155262	0.84168
chr15	74962408	74962908	chr15	75155261	75155262	0.619327
chr15	74988523	74989023	chr15	75155261	75155262	0.570279
chr15	74989043	74989543	chr15	75155261	75155262	0.735116
chr15	75857058	75857558	chr15	75862339	75862340	0.570137
chr15	75875734	75876234	chr15	75862339	75862340	0.667026
chr15	76204091	76204591	chr15	76243440	76243441	0.569566
chr15	76203444	76203944	chr15	76246807	76246808	0.605265
chr15	76204091	76204591	chr15	76246807	76246808	0.815658
chr15	76267878	76268378	chr15	76246807	76246808	0.668864
chr15	76268962	76269462	chr15	76246807	76246808	0.652852
chr15	76269595	76270095	chr15	76246807	76246808	0.666213
chr15	76270484	76270984	chr15	76246807	76246808	0.736207
chr15	76273667	76274167	chr15	76246807	76246808	0.754342
chr15	76274613	76275113	chr15	76246807	76246808	0.660656
chr15	76281121	76281621	chr15	76246807	76246808	0.674747
chr15	76287575	76288075	chr15	76246807	76246808	0.686523
chr15	76299414	76299914	chr15	76246807	76246808	0.609895
chr15	76232850	76233350	chr15	76380513	76380514	0.504143
chr15	76267878	76268378	chr15	76511818	76511819	0.7153
chr15	76268962	76269462	chr15	76511818	76511819	0.736594
chr15	76269595	76270095	chr15	76511818	76511819	0.761888
chr15	76270484	76270984	chr15	76511818	76511819	0.813436
chr15	76273667	76274167	chr15	76511818	76511819	0.81099
chr15	76274613	76275113	chr15	76511818	76511819	0.75922
chr15	76281121	76281621	chr15	76511818	76511819	0.735607
chr15	76287575	76288075	chr15	76511818	76511819	0.746144
chr15	76293928	76294428	chr15	76511818	76511819	0.511712
chr15	76299414	76299914	chr15	76511818	76511819	0.574364
chr15	76507190	76507690	chr15	76511818	76511819	0.623002
chr15	78242526	78243026	chr15	78244811	78244812	0.524627
chr15	78244578	78245078	chr15	78244811	78244812	0.937455
chr15	78245233	78245733	chr15	78244811	78244812	0.87338
chr15	78246126	78246626	chr15	78244811	78244812	0.846511
chr15	78246823	78247323	chr15	78244811	78244812	0.770084
chr15	78247684	78248184	chr15	78244811	78244812	0.907481
chr15	78248330	78248830	chr15	78244811	78244812	0.922127
chr15	78257387	78257887	chr15	78244811	78244812	0.659757
chr15	78258152	78258652	chr15	78244811	78244812	0.934103
chr15	78267774	78268274	chr15	78244811	78244812	0.647462
chr15	78305436	78305936	chr15	78244811	78244812	0.737179
chr15	78325797	78326297	chr15	78244811	78244812	0.725864
chr15	78242526	78243026	chr15	78325798	78325799	0.545146
chr15	78244578	78245078	chr15	78325798	78325799	0.944662
chr15	78245233	78245733	chr15	78325798	78325799	0.867058
chr15	78246126	78246626	chr15	78325798	78325799	0.879292
chr15	78246823	78247323	chr15	78325798	78325799	0.771857
chr15	78247684	78248184	chr15	78325798	78325799	0.925931
chr15	78248330	78248830	chr15	78325798	78325799	0.925208
chr15	78257387	78257887	chr15	78325798	78325799	0.660175
chr15	78258152	78258652	chr15	78325798	78325799	0.950868
chr15	78267774	78268274	chr15	78325798	78325799	0.693666
chr15	78305436	78305936	chr15	78325798	78325799	0.727163
chr15	78325797	78326297	chr15	78325798	78325799	0.739434
chr15	78563921	78564421	chr15	78325798	78325799	0.854254
chr15	78571570	78572070	chr15	78325798	78325799	0.828232
chr15	78572565	78573065	chr15	78325798	78325799	0.928179
chr15	78305436	78305936	chr15	78495066	78495067	0.52351
chr15	78325797	78326297	chr15	78495066	78495067	0.552363
chr15	78325797	78326297	chr15	78572783	78572784	0.803168
chr15	78563921	78564421	chr15	78572783	78572784	0.794925
chr15	78571570	78572070	chr15	78572783	78572784	0.824528
chr15	78572565	78573065	chr15	78572783	78572784	0.927585
chr15	78588881	78589381	chr15	78572783	78572784	0.913319
chr15	78591775	78592275	chr15	78572783	78572784	0.855392
chr15	78596830	78597330	chr15	78572783	78572784	0.87526
chr15	78597779	78598279	chr15	78572783	78572784	0.727493
chr15	78599064	78599564	chr15	78572783	78572784	0.874312
chr15	78607439	78607939	chr15	78572783	78572784	0.914018
chr15	78809642	78810142	chr15	78572783	78572784	0.763245
chr15	78815266	78815766	chr15	78572783	78572784	0.676272
chr15	78815957	78816457	chr15	78572783	78572784	0.59082
chr15	78563921	78564421	chr15	78597047	78597048	0.65653
chr15	78571570	78572070	chr15	78597047	78597048	0.729773
chr15	78572565	78573065	chr15	78597047	78597048	0.847136
chr15	78588881	78589381	chr15	78597047	78597048	0.864099
chr15	78591775	78592275	chr15	78597047	78597048	0.72804
chr15	78596830	78597330	chr15	78597047	78597048	0.846462
chr15	78597779	78598279	chr15	78597047	78597048	0.766946
chr15	78599064	78599564	chr15	78597047	78597048	0.741
chr15	78607439	78607939	chr15	78597047	78597048	0.876901
chr15	78809642	78810142	chr15	78597047	78597048	0.691776
chr15	78815266	78815766	chr15	78597047	78597048	0.663265
chr15	78815957	78816457	chr15	78597047	78597048	0.516323
chr15	78771597	78772097	chr15	78773445	78773446	0.852927
chr15	78772331	78772831	chr15	78773445	78773446	0.755352
chr15	78809642	78810142	chr15	78899768	78899769	0.568913
chr15	78879085	78879585	chr15	78899768	78899769	0.672774
chr15	80634932	80635432	chr15	80572597	80572598	0.535528
chr15	83003123	83003623	chr15	82899080	82899081	0.52485
chr15	83009452	83009952	chr15	82899080	82899081	0.526753
chr15	83003123	83003623	chr15	83033397	83033398	0.581125
chr15	83009452	83009952	chr15	83033397	83033398	0.856473
chr15	83030256	83030756	chr15	83033397	83033398	0.511756
chr15	83033024	83033524	chr15	83033397	83033398	0.514946
chr15	83036033	83036533	chr15	83033397	83033398	0.528925
chr15	83407982	83408482	chr15	83563573	83563574	0.564989
chr15	84235635	84236135	chr15	84232043	84232044	0.725434
chr15	84324491	84324991	chr15	84232043	84232044	0.542068
chr15	84325778	84326278	chr15	84232043	84232044	0.56185
chr15	84235635	84236135	chr15	84324720	84324721	0.821768
chr15	84324491	84324991	chr15	84324720	84324721	0.809493
chr15	90963289	90963789	chr15	91191807	91191808	0.861906
chr15	91632957	91633457	chr15	91673224	91673225	0.603517
chr15	91641684	91642184	chr15	91673224	91673225	0.768078
chr15	91643665	91644165	chr15	91673224	91673225	0.736496
chr15	96475413	96475913	chr15	96642913	96642914	0.603352
chr15	96638187	96638687	chr15	96642913	96642914	0.669424
chr15	96654675	96655175	chr15	96642913	96642914	0.626616
chr15	96655425	96655925	chr15	96642913	96642914	0.64808
chr15	96736639	96737139	chr15	96642913	96642914	0.559615
chr15	96743316	96743816	chr15	96642913	96642914	0.665622
chr15	96757384	96757884	chr15	96642913	96642914	0.687286
chr15	97816638	97817138	chr15	97784365	97784366	0.544231
chr15	99029502	99030002	chr15	98898540	98898541	0.547903
chr15	99029502	99030002	chr15	99029891	99029892	0.659851
chr15	99030014	99030514	chr15	99029891	99029892	0.659986
chr15	100669306	100669806	chr15	100615662	100615663	0.545373
chr15	100669306	100669806	chr15	100636940	100636941	0.789759
chr15	100460906	100461406	chr15	100669500	100669501	0.54734
chr15	100461643	100462143	chr15	100669500	100669501	0.629369
chr15	100664795	100665295	chr15	100669500	100669501	0.655981
chr15	100669306	100669806	chr15	100669500	100669501	0.877734
chr15	100728592	100729092	chr15	100669500	100669501	0.516364
chr15	100737658	100738158	chr15	100669500	100669501	0.513285
chr15	100461643	100462143	chr15	100687920	100687921	0.512143
chr15	100669306	100669806	chr15	100729376	100729377	0.859493
chr15	101244084	101244584	chr15	101491512	101491513	0.590626
chr15	101256000	101256500	chr15	101491512	101491513	0.680631
chr15	101256793	101257293	chr15	101491512	101491513	0.825331
chr15	101262387	101262887	chr15	101491512	101491513	0.597786
chr15	101371633	101372133	chr15	101491512	101491513	0.915802
chr15	101373082	101373582	chr15	101491512	101491513	0.929435
chr15	101374842	101375342	chr15	101491512	101491513	0.785658
chr15	101388077	101388577	chr15	101491512	101491513	0.500741
chr15	102243352	102243852	chr15	102231935	102231936	0.619948
chr15	102243352	102243852	chr15	102459170	102459171	0.59718
chr15	103257673	103258173	chr15	103258403	103258404	0.779899
chr15	103258254	103258754	chr15	103258403	103258404	0.86078
chr15	103361239	103361739	chr15	103258403	103258404	0.75342
chr15	103370358	103370858	chr15	103258403	103258404	0.768171
chr15	103453517	103454017	chr15	103258403	103258404	0.785418
chr15	103257673	103258173	chr15	103310438	103310439	0.668033
chr15	103258254	103258754	chr15	103310438	103310439	0.793671
chr15	103333605	103334105	chr15	103310438	103310439	0.602187
chr15	103361239	103361739	chr15	103310438	103310439	0.705503
chr15	103370358	103370858	chr15	103310438	103310439	0.899174
chr15	103453517	103454017	chr15	103310438	103310439	0.92072
chr15	103258254	103258754	chr15	103453825	103453826	0.570264
chr15	103333093	103333593	chr15	103453825	103453826	0.611162
chr15	103333605	103334105	chr15	103453825	103453826	0.809213
chr15	103370358	103370858	chr15	103453825	103453826	0.777719
chr15	103453517	103454017	chr15	103453825	103453826	0.841296
chr16	3699250	3699750	chr16	3884619	3884620	0.552023
chr16	3723168	3723668	chr16	3884619	3884620	0.662589
chr16	3895339	3895839	chr16	3884619	3884620	0.635135
chr16	4912915	4913415	chr16	4679720	4679721	0.587735
chr16	4969378	4969878	chr16	5013553	5013554	0.54673
chr16	5011615	5012115	chr16	5013553	5013554	0.550945
chr16	5203212	5203712	chr16	5013553	5013554	0.50701
chr16	16907693	16908193	chr16	16896469	16896470	0.621197
chr16	22629873	22630373	chr16	22657231	22657232	0.776769
chr16	22654431	22654931	chr16	22657231	22657232	0.789822
chr16	22654943	22655443	chr16	22657231	22657232	0.617149
chr16	22655689	22656189	chr16	22657231	22657232	0.63767
chr16	22656284	22656784	chr16	22657231	22657232	0.675743
chr16	22656906	22657406	chr16	22657231	22657232	0.716374
chr16	22658073	22658573	chr16	22657231	22657232	0.698891
chr16	23609698	23610198	chr16	23609919	23609920	0.514402
chr16	24076422	24076922	chr16	23988612	23988613	0.65655
chr16	24089388	24089888	chr16	23988612	23988613	0.652502
chr16	24089915	24090415	chr16	23988612	23988613	0.72072
chr16	24193213	24193713	chr16	23988612	23988613	0.630194
chr16	24199284	24199784	chr16	23988612	23988613	0.637473
chr16	24199793	24200293	chr16	23988612	23988613	0.679275
chr16	24202560	24203060	chr16	23988612	23988613	0.682445
chr16	24215234	24215734	chr16	23988612	23988613	0.608231
chr16	24238289	24238789	chr16	23988612	23988613	0.618517
chr16	32102183	32102683	chr16	32165476	32165477	0.560752
chr16	32113524	32114024	chr16	32165476	32165477	0.853731
chr16	32163307	32163807	chr16	32165476	32165477	0.793359
chr16	32165319	32165819	chr16	32165476	32165477	0.742948
chr16	32170599	32171099	chr16	32165476	32165477	0.813527
chr16	32171234	32171734	chr16	32165476	32165477	0.841963
chr16	32176862	32177362	chr16	32165476	32165477	0.654427
chr16	32190079	32190579	chr16	32165476	32165477	0.716055
chr16	32202632	32203132	chr16	32165476	32165477	0.766587
chr16	32400324	32400824	chr16	32165476	32165477	0.616607
chr16	32401580	32402080	chr16	32165476	32165477	0.78753
chr16	32190079	32190579	chr16	32419702	32419703	0.537628
chr16	36183317	36183817	chr16	35938470	35938471	0.503334
chr16	36156646	36157146	chr16	36156811	36156812	0.835365
chr16	36157329	36157829	chr16	36156811	36156812	0.76648
chr16	36183317	36183817	chr16	36156811	36156812	0.847684
chr16	36185467	36185967	chr16	36156811	36156812	0.852984
chr16	36191668	36192168	chr16	36156811	36156812	0.886231
chr16	36196593	36197093	chr16	36156811	36156812	0.908251
chr16	36198254	36198754	chr16	36156811	36156812	0.73552
chr16	36209049	36209549	chr16	36156811	36156812	0.668937
chr16	36209900	36210400	chr16	36156811	36156812	0.826783
chr16	36212265	36212765	chr16	36156811	36156812	0.792352
chr16	36276663	36277163	chr16	36156811	36156812	0.860589
chr16	36289100	36289600	chr16	36156811	36156812	0.845971
chr16	36307576	36308076	chr16	36156811	36156812	0.881886
chr16	36355452	36355952	chr16	36156811	36156812	0.87306
chr16	36367491	36367991	chr16	36156811	36156812	0.890043
chr16	36156646	36157146	chr16	36184212	36184213	0.815333
chr16	36157329	36157829	chr16	36184212	36184213	0.745266
chr16	36183317	36183817	chr16	36184212	36184213	0.833248
chr16	36185467	36185967	chr16	36184212	36184213	0.834805
chr16	36191668	36192168	chr16	36184212	36184213	0.885959
chr16	36196593	36197093	chr16	36184212	36184213	0.89054
chr16	36198254	36198754	chr16	36184212	36184213	0.722989
chr16	36209049	36209549	chr16	36184212	36184213	0.650545
chr16	36209900	36210400	chr16	36184212	36184213	0.811674
chr16	36212265	36212765	chr16	36184212	36184213	0.774281
chr16	36276663	36277163	chr16	36184212	36184213	0.840984
chr16	36289100	36289600	chr16	36184212	36184213	0.826508
chr16	36307576	36308076	chr16	36184212	36184213	0.867053
chr16	36355452	36355952	chr16	36184212	36184213	0.856128
chr16	36367491	36367991	chr16	36184212	36184213	0.882112
chr16	36408199	36408699	chr16	36184212	36184213	0.806797
chr16	36417008	36417508	chr16	36184212	36184213	0.832488
chr16	36420839	36421339	chr16	36184212	36184213	0.846547
chr16	36156646	36157146	chr16	36210403	36210404	0.886566
chr16	36157329	36157829	chr16	36210403	36210404	0.816796
chr16	36183317	36183817	chr16	36210403	36210404	0.868988
chr16	36185467	36185967	chr16	36210403	36210404	0.886046
chr16	36191668	36192168	chr16	36210403	36210404	0.85563
chr16	36196593	36197093	chr16	36210403	36210404	0.931618
chr16	36198254	36198754	chr16	36210403	36210404	0.738476
chr16	36209049	36209549	chr16	36210403	36210404	0.711095
chr16	36209900	36210400	chr16	36210403	36210404	0.838432
chr16	36212265	36212765	chr16	36210403	36210404	0.821662
chr16	36276663	36277163	chr16	36210403	36210404	0.896752
chr16	36289100	36289600	chr16	36210403	36210404	0.896029
chr16	36307576	36308076	chr16	36210403	36210404	0.890191
chr16	36355452	36355952	chr16	36210403	36210404	0.890499
chr16	36367491	36367991	chr16	36210403	36210404	0.900906
chr16	36408199	36408699	chr16	36210403	36210404	0.868427
chr16	36417008	36417508	chr16	36210403	36210404	0.868977
chr16	36420839	36421339	chr16	36210403	36210404	0.879419
chr16	36455362	36455862	chr16	36210403	36210404	0.87232
chr16	36156646	36157146	chr16	36221562	36221563	0.845404
chr16	36157329	36157829	chr16	36221562	36221563	0.77262
chr16	36183317	36183817	chr16	36221562	36221563	0.834826
chr16	36185467	36185967	chr16	36221562	36221563	0.841928
chr16	36191668	36192168	chr16	36221562	36221563	0.837793
chr16	36196593	36197093	chr16	36221562	36221563	0.899503
chr16	36198254	36198754	chr16	36221562	36221563	0.70698
chr16	36209049	36209549	chr16	36221562	36221563	0.728894
chr16	36209900	36210400	chr16	36221562	36221563	0.806145
chr16	36212265	36212765	chr16	36221562	36221563	0.779508
chr16	36276663	36277163	chr16	36221562	36221563	0.856706
chr16	36289100	36289600	chr16	36221562	36221563	0.857823
chr16	36307576	36308076	chr16	36221562	36221563	0.858988
chr16	36355452	36355952	chr16	36221562	36221563	0.857024
chr16	36367491	36367991	chr16	36221562	36221563	0.881216
chr16	36408199	36408699	chr16	36221562	36221563	0.83602
chr16	36417008	36417508	chr16	36221562	36221563	0.828142
chr16	36420839	36421339	chr16	36221562	36221563	0.844721
chr16	36455362	36455862	chr16	36221562	36221563	0.833107
chr16	36465293	36465793	chr16	36221562	36221563	0.808847
chr16	36156646	36157146	chr16	36277148	36277149	0.805305
chr16	36157329	36157829	chr16	36277148	36277149	0.737293
chr16	36183317	36183817	chr16	36277148	36277149	0.827932
chr16	36185467	36185967	chr16	36277148	36277149	0.831617
chr16	36191668	36192168	chr16	36277148	36277149	0.890844
chr16	36196593	36197093	chr16	36277148	36277149	0.888618
chr16	36198254	36198754	chr16	36277148	36277149	0.730971
chr16	36209049	36209549	chr16	36277148	36277149	0.642166
chr16	36209900	36210400	chr16	36277148	36277149	0.810782
chr16	36212265	36212765	chr16	36277148	36277149	0.773203
chr16	36276663	36277163	chr16	36277148	36277149	0.841063
chr16	36289100	36289600	chr16	36277148	36277149	0.815817
chr16	36307576	36308076	chr16	36277148	36277149	0.875755
chr16	36355452	36355952	chr16	36277148	36277149	0.856479
chr16	36367491	36367991	chr16	36277148	36277149	0.874308
chr16	36408199	36408699	chr16	36277148	36277149	0.801494
chr16	36417008	36417508	chr16	36277148	36277149	0.836742
chr16	36420839	36421339	chr16	36277148	36277149	0.852979
chr16	36455362	36455862	chr16	36277148	36277149	0.810067
chr16	36465293	36465793	chr16	36277148	36277149	0.824616
chr16	36476797	36477297	chr16	36277148	36277149	0.806728
chr16	36156646	36157146	chr16	36334332	36334333	0.916312
chr16	36157329	36157829	chr16	36334332	36334333	0.852749
chr16	36183317	36183817	chr16	36334332	36334333	0.899875
chr16	36185467	36185967	chr16	36334332	36334333	0.928419
chr16	36191668	36192168	chr16	36334332	36334333	0.877322
chr16	36196593	36197093	chr16	36334332	36334333	0.958823
chr16	36198254	36198754	chr16	36334332	36334333	0.773428
chr16	36209049	36209549	chr16	36334332	36334333	0.733086
chr16	36209900	36210400	chr16	36334332	36334333	0.870327
chr16	36212265	36212765	chr16	36334332	36334333	0.860729
chr16	36276663	36277163	chr16	36334332	36334333	0.934139
chr16	36289100	36289600	chr16	36334332	36334333	0.921444
chr16	36307576	36308076	chr16	36334332	36334333	0.92639
chr16	36355452	36355952	chr16	36334332	36334333	0.920595
chr16	36367491	36367991	chr16	36334332	36334333	0.909224
chr16	36408199	36408699	chr16	36334332	36334333	0.89374
chr16	36417008	36417508	chr16	36334332	36334333	0.913363
chr16	36420839	36421339	chr16	36334332	36334333	0.91689
chr16	36455362	36455862	chr16	36334332	36334333	0.90265
chr16	36465293	36465793	chr16	36334332	36334333	0.893624
chr16	36476797	36477297	chr16	36334332	36334333	0.83941
chr16	36156646	36157146	chr16	36367570	36367571	0.819416
chr16	36157329	36157829	chr16	36367570	36367571	0.749191
chr16	36183317	36183817	chr16	36367570	36367571	0.835389
chr16	36185467	36185967	chr16	36367570	36367571	0.837214
chr16	36191668	36192168	chr16	36367570	36367571	0.882577
chr16	36196593	36197093	chr16	36367570	36367571	0.89274
chr16	36198254	36198754	chr16	36367570	36367571	0.722614
chr16	36209049	36209549	chr16	36367570	36367571	0.65521
chr16	36209900	36210400	chr16	36367570	36367571	0.81376
chr16	36212265	36212765	chr16	36367570	36367571	0.777499
chr16	36276663	36277163	chr16	36367570	36367571	0.842542
chr16	36289100	36289600	chr16	36367570	36367571	0.830185
chr16	36307576	36308076	chr16	36367570	36367571	0.865935
chr16	36355452	36355952	chr16	36367570	36367571	0.857779
chr16	36367491	36367991	chr16	36367570	36367571	0.885524
chr16	36408199	36408699	chr16	36367570	36367571	0.809619
chr16	36417008	36417508	chr16	36367570	36367571	0.832199
chr16	36420839	36421339	chr16	36367570	36367571	0.846619
chr16	36455362	36455862	chr16	36367570	36367571	0.821819
chr16	36465293	36465793	chr16	36367570	36367571	0.820098
chr16	36476797	36477297	chr16	36367570	36367571	0.795513
chr16	36183317	36183817	chr16	36408363	36408364	0.848369
chr16	36185467	36185967	chr16	36408363	36408364	0.852284
chr16	36191668	36192168	chr16	36408363	36408364	0.869463
chr16	36196593	36197093	chr16	36408363	36408364	0.90687
chr16	36198254	36198754	chr16	36408363	36408364	0.725092
chr16	36209049	36209549	chr16	36408363	36408364	0.676525
chr16	36209900	36210400	chr16	36408363	36408364	0.82299
chr16	36212265	36212765	chr16	36408363	36408364	0.791424
chr16	36276663	36277163	chr16	36408363	36408364	0.860066
chr16	36289100	36289600	chr16	36408363	36408364	0.855913
chr16	36307576	36308076	chr16	36408363	36408364	0.870248
chr16	36355452	36355952	chr16	36408363	36408364	0.870357
chr16	36367491	36367991	chr16	36408363	36408364	0.893988
chr16	36408199	36408699	chr16	36408363	36408364	0.82979
chr16	36417008	36417508	chr16	36408363	36408364	0.840167
chr16	36420839	36421339	chr16	36408363	36408364	0.85522
chr16	36455362	36455862	chr16	36408363	36408364	0.839814
chr16	36465293	36465793	chr16	36408363	36408364	0.826087
chr16	36476797	36477297	chr16	36408363	36408364	0.806223
chr16	36626799	36627299	chr16	36408363	36408364	0.801623
chr16	36209049	36209549	chr16	36455392	36455393	0.662263
chr16	36209900	36210400	chr16	36455392	36455393	0.82245
chr16	36212265	36212765	chr16	36455392	36455393	0.78688
chr16	36276663	36277163	chr16	36455392	36455393	0.856583
chr16	36289100	36289600	chr16	36455392	36455393	0.839292
chr16	36307576	36308076	chr16	36455392	36455393	0.880296
chr16	36355452	36355952	chr16	36455392	36455393	0.869142
chr16	36367491	36367991	chr16	36455392	36455393	0.885943
chr16	36408199	36408699	chr16	36455392	36455393	0.819236
chr16	36417008	36417508	chr16	36455392	36455393	0.84558
chr16	36420839	36421339	chr16	36455392	36455393	0.861976
chr16	36455362	36455862	chr16	36455392	36455393	0.828121
chr16	36465293	36465793	chr16	36455392	36455393	0.833158
chr16	36476797	36477297	chr16	36455392	36455393	0.813714
chr16	36626799	36627299	chr16	36455392	36455393	0.828551
chr16	36665822	36666322	chr16	36455392	36455393	0.667786
chr16	36417008	36417508	chr16	36666077	36666078	0.504839
chr16	36420839	36421339	chr16	36666077	36666078	0.562702
chr16	36465293	36465793	chr16	36666077	36666078	0.531831
chr16	36476797	36477297	chr16	36666077	36666078	0.718617
chr16	36626799	36627299	chr16	36666077	36666078	0.818141
chr16	36640978	36641478	chr16	36666077	36666078	0.537422
chr16	36642604	36643104	chr16	36666077	36666078	0.800448
chr16	36665822	36666322	chr16	36666077	36666078	0.902359
chr16	36709409	36709909	chr16	36666077	36666078	0.798306
chr16	36711654	36712154	chr16	36666077	36666078	0.824749
chr16	36709409	36709909	chr16	36934983	36934984	0.69508
chr16	36711654	36712154	chr16	36934983	36934984	0.717084
chr16	36934779	36935279	chr16	36934983	36934984	0.84271
chr16	36985731	36986231	chr16	36934983	36934984	0.705199
chr16	48786175	48786675	chr16	48872608	48872609	0.752437
chr16	49801457	49801957	chr16	49855654	49855655	0.527944
chr16	49836704	49837204	chr16	49855654	49855655	0.517389
chr16	75877116	75877616	chr16	75953332	75953333	0.641585
chr16	75909019	75909519	chr16	75953332	75953333	0.73925
chr16	75961009	75961509	chr16	75953332	75953333	0.612423
chr16	87652924	87653424	chr16	87698954	87698955	0.569239
chr16	87654206	87654706	chr16	87698954	87698955	0.607518
chr16	87661176	87661676	chr16	87698954	87698955	0.589885
chr16	87688772	87689272	chr16	87698954	87698955	0.577819
chr16	91354611	91355111	chr16	91406235	91406236	0.547189
chr16	91355121	91355621	chr16	91406235	91406236	0.59841
chr16	91366579	91367079	chr16	91406235	91406236	0.578725
chr16	91398131	91398631	chr16	91406235	91406236	0.587843
chr16	91407900	91408400	chr16	91406235	91406236	0.522278
chr16	91415338	91415838	chr16	91406235	91406236	0.643111
chr16	91447169	91447669	chr16	91406235	91406236	0.56346
chr16	91451876	91452376	chr16	91406235	91406236	0.603314
chr16	91522427	91522927	chr16	91406235	91406236	0.554188
chr16	91522930	91523430	chr16	91406235	91406236	0.535457
chr16	91523896	91524396	chr16	91406235	91406236	0.544778
chr16	91526961	91527461	chr16	91406235	91406236	0.530621
chr16	91606906	91607406	chr16	91406235	91406236	0.571521
chr16	91522427	91522927	chr16	91688728	91688729	0.580016
chr16	91522930	91523430	chr16	91688728	91688729	0.581946
chr16	91606906	91607406	chr16	91688728	91688729	0.501109
chr16	92620653	92621153	chr16	92826074	92826075	0.631025
chr16	92675641	92676141	chr16	92826074	92826075	0.749941
chr16	92715418	92715918	chr16	92826074	92826075	0.677017
chr16	92786985	92787485	chr16	92826074	92826075	0.683438
chr16	92801471	92801971	chr16	92826074	92826075	0.75787
chr16	92821905	92822405	chr16	92826074	92826075	0.628706
chr16	92823492	92823992	chr16	92826074	92826075	0.527359
chr16	92824693	92825193	chr16	92826074	92826075	0.568494
chr16	92825314	92825814	chr16	92826074	92826075	0.719955
chr16	92825824	92826324	chr16	92826074	92826075	0.714057
chr16	92867359	92867859	chr16	92826074	92826075	0.871752
chr16	93028571	93029071	chr16	92826074	92826075	0.857568
chr16	96370158	96370658	chr16	96443614	96443615	0.544331
chr16	96439637	96440137	chr16	96443614	96443615	0.912475
chr16	96441583	96442083	chr16	96443614	96443615	0.702043
chr16	96443400	96443900	chr16	96443614	96443615	0.815822
chr16	96624716	96625216	chr16	96443614	96443615	0.77762
chr17	6746027	6746527	chr17	6948356	6948357	0.762537
chr17	6746672	6747172	chr17	6948356	6948357	0.686626
chr17	7874681	7875181	chr17	7926000	7926001	0.641528
chr17	7877930	7878430	chr17	7926000	7926001	0.552454
chr17	7888961	7889461	chr17	7926000	7926001	0.825778
chr17	7896980	7897480	chr17	7926000	7926001	0.606836
chr17	7917104	7917604	chr17	7926000	7926001	0.840187
chr17	7925713	7926213	chr17	7926000	7926001	0.704867
chr17	17865049	17865549	chr17	17883939	17883940	0.7942
chr17	17866559	17867059	chr17	17883939	17883940	0.556116
chr17	17870869	17871369	chr17	17883939	17883940	0.857701
chr17	17876618	17877118	chr17	17883939	17883940	0.803582
chr17	17865049	17865549	chr17	17887824	17887825	0.752215
chr17	17866559	17867059	chr17	17887824	17887825	0.583873
chr17	17870869	17871369	chr17	17887824	17887825	0.76256
chr17	17876618	17877118	chr17	17887824	17887825	0.698071
chr17	24742273	24742773	chr17	24736642	24736643	0.68323
chr17	26535145	26535645	chr17	26508472	26508473	0.538629
chr17	27555757	27556257	chr17	27556574	27556575	0.500831
chr17	27551483	27551983	chr17	27565727	27565728	0.532155
chr17	27552368	27552868	chr17	27565727	27565728	0.536261
chr17	27555757	27556257	chr17	27565727	27565728	0.630507
chr17	27994477	27994977	chr17	28207778	28207779	0.581097
chr17	28014848	28015348	chr17	28207778	28207779	0.567658
chr17	28180727	28181227	chr17	28207778	28207779	0.606566
chr17	28208081	28208581	chr17	28207778	28207779	0.554567
chr17	28211703	28212203	chr17	28207778	28207779	0.578783
chr17	28217838	28218338	chr17	28207778	28207779	0.511136
chr17	28259739	28260239	chr17	28207778	28207779	0.677442
chr17	28856010	28856510	chr17	28769317	28769318	0.528104
chr17	28856010	28856510	chr17	29090979	29090980	0.525808
chr17	28967126	28967626	chr17	29090979	29090980	0.524349
chr17	29009148	29009648	chr17	29090979	29090980	0.665497
chr17	29094194	29094694	chr17	29090979	29090980	0.534014
chr17	29095318	29095818	chr17	29090979	29090980	0.609842
chr17	29113847	29114347	chr17	29090979	29090980	0.633306
chr17	29164265	29164765	chr17	29090979	29090980	0.501138
chr17	29318828	29319328	chr17	29090979	29090980	0.615775
chr17	28946928	28947428	chr17	29135056	29135057	0.85794
chr17	28951522	28952022	chr17	29135056	29135057	0.547546
chr17	28966556	28967056	chr17	29135056	29135057	0.570105
chr17	28967126	28967626	chr17	29135056	29135057	0.766291
chr17	29009148	29009648	chr17	29135056	29135057	0.6983
chr17	29113847	29114347	chr17	29135056	29135057	0.750474
chr17	29172018	29172518	chr17	29135056	29135057	0.583195
chr17	29318828	29319328	chr17	29135056	29135057	0.756421
chr17	29113847	29114347	chr17	29268788	29268789	0.586255
chr17	29113847	29114347	chr17	29318882	29318883	0.627085
chr17	29318828	29319328	chr17	29318882	29318883	0.715442
chr17	29393619	29394119	chr17	29318882	29318883	0.523291
chr17	29394147	29394647	chr17	29318882	29318883	0.560991
chr17	29394756	29395256	chr17	29318882	29318883	0.649255
chr17	29395431	29395931	chr17	29318882	29318883	0.668934
chr17	29396039	29396539	chr17	29318882	29318883	0.655406
chr17	29488835	29489335	chr17	29318882	29318883	0.703827
chr17	29494303	29494803	chr17	29318882	29318883	0.561487
chr17	29497044	29497544	chr17	29318882	29318883	0.534737
chr17	29497994	29498494	chr17	29318882	29318883	0.692618
chr17	29510657	29511157	chr17	29318882	29318883	0.721064
chr17	29113847	29114347	chr17	29360914	29360915	0.637989
chr17	29164265	29164765	chr17	29360914	29360915	0.566819
chr17	29360632	29361132	chr17	29360914	29360915	0.573258
chr17	29361977	29362477	chr17	29360914	29360915	0.527148
chr17	29393619	29394119	chr17	29360914	29360915	0.762287
chr17	29394147	29394647	chr17	29360914	29360915	0.64275
chr17	29394756	29395256	chr17	29360914	29360915	0.753982
chr17	29395431	29395931	chr17	29360914	29360915	0.788694
chr17	29396039	29396539	chr17	29360914	29360915	0.527209
chr17	29431980	29432480	chr17	29360914	29360915	0.91981
chr17	29434423	29434923	chr17	29360914	29360915	0.661231
chr17	29494303	29494803	chr17	29360914	29360915	0.728711
chr17	29497994	29498494	chr17	29360914	29360915	0.559775
chr17	29510657	29511157	chr17	29360914	29360915	0.595654
chr17	29394756	29395256	chr17	29491045	29491046	0.506701
chr17	29395431	29395931	chr17	29491045	29491046	0.52837
chr17	29396039	29396539	chr17	29491045	29491046	0.50055
chr17	30518821	30519321	chr17	30626905	30626906	0.54663
chr17	33555446	33555946	chr17	33555707	33555708	0.874539
chr17	33563409	33563909	chr17	33555707	33555708	0.74263
chr17	33566161	33566661	chr17	33555707	33555708	0.757496
chr17	33637786	33638286	chr17	33555707	33555708	0.844816
chr17	33640061	33640561	chr17	33555707	33555708	0.72569
chr17	33555446	33555946	chr17	33629092	33629093	0.518861
chr17	33563409	33563909	chr17	33629092	33629093	0.552577
chr17	33566161	33566661	chr17	33629092	33629093	0.52788
chr17	33637786	33638286	chr17	33629092	33629093	0.529995
chr17	33640061	33640561	chr17	33629092	33629093	0.559523
chr17	33555446	33555946	chr17	33630759	33630760	0.835131
chr17	33563409	33563909	chr17	33630759	33630760	0.872849
chr17	33566161	33566661	chr17	33630759	33630760	0.834437
chr17	33637786	33638286	chr17	33630759	33630760	0.857321
chr17	33640061	33640561	chr17	33630759	33630760	0.886901
chr17	33978119	33978619	chr17	33905135	33905136	0.501379
chr17	33978693	33979193	chr17	33905135	33905136	0.660824
chr17	34000092	34000592	chr17	33905135	33905136	0.51385
chr17	34032830	34033330	chr17	33905135	33905136	0.535422
chr17	34142867	34143367	chr17	33905135	33905136	0.540723
chr17	33978693	33979193	chr17	33929894	33929895	0.550504
chr17	34000092	34000592	chr17	33929894	33929895	0.564201
chr17	34032830	34033330	chr17	33929894	33929895	0.522628
chr17	34142867	34143367	chr17	33929894	33929895	0.503234
chr17	34142867	34143367	chr17	33951488	33951489	0.503338
chr17	33978693	33979193	chr17	34000333	34000334	0.760404
chr17	34000092	34000592	chr17	34000333	34000334	0.785452
[truncated: 2,797 more rows]

## Sheet: Cluster 2 p2g
chr1	4653825	4654325	chr1	4785726	4785727	0.640653
chr1	4688072	4688572	chr1	4785726	4785727	0.646239
chr1	5017847	5018347	chr1	4785726	4785727	0.630228
chr1	5018548	5019048	chr1	4785726	4785727	0.524229
chr1	5023323	5023823	chr1	4785726	4785727	0.636407
chr1	9699203	9699703	chr1	9798130	9798131	0.500586
chr1	9784184	9784684	chr1	9798130	9798131	0.57494
chr1	9908388	9908888	chr1	9798130	9798131	0.560169
chr1	9908980	9909480	chr1	9798130	9798131	0.542474
chr1	9784184	9784684	chr1	9908638	9908639	0.558485
chr1	9908388	9908888	chr1	9908638	9908639	0.688373
chr1	9908980	9909480	chr1	9908638	9908639	0.622565
chr1	9784184	9784684	chr1	9967485	9967486	0.549636
chr1	9908388	9908888	chr1	9967485	9967486	0.670186
chr1	9908980	9909480	chr1	9967485	9967486	0.706084
chr1	9908388	9908888	chr1	10038159	10038160	0.60435
chr1	9908980	9909480	chr1	10038159	10038160	0.637244
chr1	15883531	15884031	chr1	15805646	15805647	0.677226
chr1	33838832	33839332	chr1	33814595	33814596	0.550531
chr1	34011853	34012353	chr1	33814595	33814596	0.580159
chr1	34498189	34498689	chr1	34439829	34439830	0.501925
chr1	34723628	34724128	chr1	34843050	34843051	0.616955
chr1	34929868	34930368	chr1	34843050	34843051	0.724734
chr1	34930479	34930979	chr1	34843050	34843051	0.741269
chr1	36464608	36465108	chr1	36683183	36683184	0.725881
chr1	36682285	36682785	chr1	36683183	36683184	0.78181
chr1	36682911	36683411	chr1	36683183	36683184	0.893354
chr1	36746412	36746912	chr1	36683183	36683184	0.521661
chr1	36759045	36759545	chr1	36683183	36683184	0.779313
chr1	36770938	36771438	chr1	36683183	36683184	0.85572
chr1	36786450	36786950	chr1	36683183	36683184	0.583048
chr1	37614068	37614568	chr1	37719811	37719812	0.651864
chr1	37691163	37691663	chr1	37719811	37719812	0.578234
chr1	38239475	38239975	chr1	37997250	37997251	0.536529
chr1	38131098	38131598	chr1	37998010	37998011	0.500181
chr1	38218092	38218592	chr1	37998010	37998011	0.595997
chr1	38239475	38239975	chr1	37998010	37998011	0.685173
chr1	38131098	38131598	chr1	38129662	38129663	0.552443
chr1	38239475	38239975	chr1	38129662	38129663	0.733573
chr1	39404083	39404583	chr1	39535554	39535555	0.71483
chr1	40055252	40055752	chr1	40084768	40084769	0.615064
chr1	40101364	40101864	chr1	40084768	40084769	0.570541
chr1	42922787	42923287	chr1	42851233	42851234	0.576964
chr1	43032378	43032878	chr1	42851233	42851234	0.626636
chr1	44035000	44035500	chr1	44102388	44102389	0.606414
chr1	44166951	44167451	chr1	44102388	44102389	0.578716
chr1	55127867	55128367	chr1	55363469	55363470	0.641521
chr1	55171847	55172347	chr1	55363469	55363470	0.748508
chr1	55362518	55363018	chr1	55363469	55363470	0.84072
chr1	57956288	57956788	chr1	57970084	57970085	0.532613
chr1	58105596	58106096	chr1	57970084	57970085	0.783467
chr1	58195476	58195976	chr1	57970084	57970085	0.664691
chr1	58195476	58195976	chr1	58393097	58393098	0.600812
chr1	59094407	59094907	chr1	59237231	59237232	0.62873
chr1	59563000	59563500	chr1	59516264	59516265	0.805394
chr1	59606499	59606999	chr1	59516264	59516265	0.795353
chr1	71467933	71468433	chr1	71557156	71557157	0.62295
chr1	71467933	71468433	chr1	71652837	71652838	0.595752
chr1	71812228	71812728	chr1	71652837	71652838	0.677672
chr1	73052076	73052576	chr1	73015899	73015900	0.664002
chr1	75253022	75253522	chr1	75180392	75180393	0.52998
chr1	78263956	78264456	chr1	78488897	78488898	0.528314
chr1	78532085	78532585	chr1	78488897	78488898	0.627167
chr1	78532085	78532585	chr1	78657825	78657826	0.52855
chr1	79671730	79672230	chr1	79761769	79761770	0.533198
chr1	79671730	79672230	chr1	79776018	79776019	0.504613
chr1	80184390	80184890	chr1	80340690	80340691	0.514561
chr1	84622807	84623307	chr1	84840516	84840517	0.560103
chr1	84878357	84878857	chr1	84840516	84840517	0.768161
chr1	84879576	84880076	chr1	84840516	84840517	0.616765
chr1	84878357	84878857	chr1	84839841	84839842	0.832475
chr1	84879576	84880076	chr1	84839841	84839842	0.663203
chr1	85929215	85929715	chr1	86064619	86064620	0.639848
chr1	85966854	85967354	chr1	86064619	86064620	0.562334
chr1	86021977	86022477	chr1	86064619	86064620	0.621175
chr1	85929215	85929715	chr1	86154780	86154781	0.559439
chr1	85966854	85967354	chr1	86154780	86154781	0.519296
chr1	86021977	86022477	chr1	86154780	86154781	0.52811
chr1	86387400	86387900	chr1	86154780	86154781	0.501074
chr1	86381024	86381524	chr1	86359455	86359456	0.501066
chr1	86387400	86387900	chr1	86359455	86359456	0.653285
chr1	86466757	86467257	chr1	86359455	86359456	0.716822
chr1	86467303	86467803	chr1	86359455	86359456	0.775901
chr1	86466757	86467257	chr1	86587100	86587101	0.5179
chr1	86467303	86467803	chr1	86587100	86587101	0.551105
chr1	87541514	87542014	chr1	87756011	87756012	0.573584
chr1	88706415	88706915	chr1	88754890	88754891	0.537504
chr1	88795472	88795972	chr1	88754890	88754891	0.831521
chr1	90735858	90736358	chr1	90603425	90603426	0.567773
chr1	90914796	90915296	chr1	91145103	91145104	0.518894
chr1	90945118	90945618	chr1	91145103	91145104	0.581081
chr1	91144778	91145278	chr1	91145103	91145104	0.930598
chr1	91222926	91223426	chr1	91145103	91145104	0.626438
chr1	91144778	91145278	chr1	91250319	91250320	0.559563
chr1	91624358	91624858	chr1	91540565	91540566	0.58203
chr1	93223893	93224393	chr1	93305879	93305880	0.525178
chr1	97570863	97571363	chr1	97770172	97770173	0.600625
chr1	118257556	118258056	chr1	118311132	118311133	0.571199
chr1	118257556	118258056	chr1	118321843	118321844	0.508228
chr1	119443559	119444059	chr1	119649000	119649001	0.609817
chr1	131003262	131003762	chr1	131138234	131138235	0.612527
chr1	133689825	133690325	chr1	133690108	133690109	0.537272
chr1	134138460	134138960	chr1	134361999	134362000	0.640071
chr1	134164592	134165092	chr1	134361999	134362000	0.697547
chr1	134290077	134290577	chr1	134361999	134362000	0.659143
chr1	134290909	134291409	chr1	134361999	134362000	0.535363
chr1	134328881	134329381	chr1	134361999	134362000	0.570365
chr1	134290077	134290577	chr1	134455531	134455532	0.633432
chr1	134290909	134291409	chr1	134455531	134455532	0.515402
chr1	134328881	134329381	chr1	134455531	134455532	0.53562
chr1	136749142	136749642	chr1	136960448	136960449	0.542763
chr1	136758640	136759140	chr1	136960448	136960449	0.780986
chr1	136839162	136839662	chr1	136960448	136960449	0.566835
chr1	153345730	153346230	chr1	153425209	153425210	0.584702
chr1	153414139	153414639	chr1	153425209	153425210	0.503162
chr1	156073115	156073615	chr1	155973255	155973256	0.642174
chr1	156082643	156083143	chr1	155973255	155973256	0.507246
chr1	156073115	156073615	chr1	156303606	156303607	0.838762
chr1	156082643	156083143	chr1	156303606	156303607	0.659225
chr1	156500148	156500648	chr1	156303606	156303607	0.924379
chr1	156500148	156500648	chr1	156558787	156558788	0.70067
chr1	156730764	156731264	chr1	156558787	156558788	0.515659
chr1	160154466	160154966	chr1	160195260	160195261	0.539692
chr1	160154466	160154966	chr1	160212892	160212893	0.658548
chr1	161256840	161257340	chr1	161070660	161070661	0.672726
chr1	161288206	161288706	chr1	161070660	161070661	0.619805
chr1	161256840	161257340	chr1	161142712	161142713	0.722264
chr1	161288206	161288706	chr1	161142712	161142713	0.663749
chr1	164149049	164149549	chr1	163994781	163994782	0.614149
chr1	164149049	164149549	chr1	163994915	163994916	0.554183
chr1	164149049	164149549	chr1	164115264	164115265	0.906706
chr1	164149049	164149549	chr1	164275598	164275599	0.706086
chr1	165432572	165433072	chr1	165461208	165461209	0.529107
chr1	165670017	165670517	chr1	165461208	165461209	0.647361
chr1	166100330	166100830	chr1	166238744	166238745	0.879302
chr1	166154668	166155168	chr1	166238744	166238745	0.599464
chr1	166157656	166158156	chr1	166238744	166238745	0.615996
chr1	166164537	166165037	chr1	166238744	166238745	0.891656
chr1	166238489	166238989	chr1	166238744	166238745	0.963533
chr1	167445875	167446375	chr1	167285127	167285128	0.668169
chr1	167446515	167447015	chr1	167285127	167285128	0.73516
chr1	170074037	170074537	chr1	169969409	169969410	0.721967
chr1	171344681	171345181	chr1	171437318	171437319	0.52884
chr1	171370082	171370582	chr1	171437318	171437319	0.533047
chr1	171477966	171478466	chr1	171437318	171437319	0.583944
chr1	172495986	172496486	chr1	172482213	172482214	0.632052
chr1	175920676	175921176	chr1	175688353	175688354	0.562739
chr1	175920676	175921176	chr1	175880778	175880779	0.55371
chr1	175978671	175979171	chr1	175880778	175880779	0.678721
chr1	177448067	177448567	chr1	177248767	177248768	0.515075
chr1	180639592	180640092	chr1	180568975	180568976	0.535643
chr1	180919632	180920132	chr1	180904274	180904275	0.544093
chr1	181067393	181067893	chr1	180904274	180904275	0.587136
chr1	180919632	180920132	chr1	181150931	181150932	0.516099
chr1	181067393	181067893	chr1	181150931	181150932	0.684908
chr1	181345580	181346080	chr1	181150931	181150932	0.579756
chr1	182483182	182483682	chr1	182341606	182341607	0.64134
chr1	182585240	182585740	chr1	182764906	182764907	0.52212
chr1	182747812	182748312	chr1	182764906	182764907	0.792876
chr1	182762997	182763497	chr1	182764906	182764907	0.609473
chr1	182777862	182778362	chr1	182764906	182764907	0.881449
chr1	185448525	185449025	chr1	185363095	185363096	0.532139
chr1	185533519	185534019	chr1	185363095	185363096	0.65011
chr1	186966870	186967370	chr1	186749358	186749359	0.776509
chr1	186967399	186967899	chr1	186749358	186749359	0.802596
chr1	186966870	186967370	chr1	186967416	186967417	0.921361
chr1	186967399	186967899	chr1	186967416	186967417	0.953867
chr1	189581766	189582266	chr1	189728268	189728269	0.599777
chr1	189717983	189718483	chr1	189728268	189728269	0.595865
chr1	189869542	189870042	chr1	189728268	189728269	0.652953
chr1	192795026	192795526	chr1	192855752	192855753	0.601127
chr1	192825724	192826224	chr1	192855752	192855753	0.579914
chr10	7608594	7609094	chr10	7667504	7667505	0.683008
chr10	7608594	7609094	chr10	7792894	7792895	0.80942
chr10	21374390	21374890	chr10	21593145	21593146	0.742771
chr10	21593111	21593611	chr10	21593145	21593146	0.913124
chr10	29196305	29196805	chr10	29313166	29313167	0.59342
chr10	29197042	29197542	chr10	29313166	29313167	0.64547
chr10	40425458	40425958	chr10	40247039	40247040	0.550504
chr10	40465870	40466370	chr10	40247039	40247040	0.591907
chr10	40969330	40969830	chr10	40883534	40883535	0.53553
chr10	41070547	41071047	chr10	40883534	40883535	0.543663
chr10	43705605	43706105	chr10	43901736	43901737	0.543529
chr10	43718684	43719184	chr10	43901736	43901737	0.666634
chr10	44005594	44006094	chr10	43901736	43901737	0.576936
chr10	44038132	44038632	chr10	43901736	43901737	0.643883
chr10	44148597	44149097	chr10	43901736	43901737	0.510408
chr10	44038132	44038632	chr10	44268339	44268340	0.67889
chr10	44265832	44266332	chr10	44268339	44268340	0.507643
chr10	44370630	44371130	chr10	44268339	44268340	0.687474
chr10	44440983	44441483	chr10	44268339	44268340	0.63214
chr10	45486524	45487024	chr10	45486395	45486396	0.560916
chr10	45497652	45498152	chr10	45486395	45486396	0.748038
chr10	45613992	45614492	chr10	45486395	45486396	0.916932
chr10	53502422	53502922	chr10	53750909	53750910	0.608441
chr10	61423200	61423700	chr10	61595484	61595485	0.633883
chr10	61605332	61605832	chr10	61595484	61595485	0.76748
chr10	61699302	61699802	chr10	61595484	61595485	0.75235
chr10	61787889	61788389	chr10	61595484	61595485	0.634789
chr10	61834291	61834791	chr10	61595484	61595485	0.832613
chr10	61423200	61423700	chr10	61648621	61648622	0.622441
chr10	61605332	61605832	chr10	61648621	61648622	0.638459
chr10	61699302	61699802	chr10	61648621	61648622	0.630066
chr10	61787889	61788389	chr10	61648621	61648622	0.599915
chr10	61834291	61834791	chr10	61648621	61648622	0.694651
chr10	61605332	61605832	chr10	61680321	61680322	0.595413
chr10	61699302	61699802	chr10	61680321	61680322	0.569419
chr10	61834291	61834791	chr10	61680321	61680322	0.630458
chr10	62031918	62032418	chr10	62111013	62111014	0.655684
chr10	62128631	62129131	chr10	62111013	62111014	0.920256
chr10	62031918	62032418	chr10	62133090	62133091	0.63877
chr10	62128631	62129131	chr10	62133090	62133091	0.920155
chr10	70004770	70005270	chr10	70097121	70097122	0.844626
chr10	70060756	70061256	chr10	70097121	70097122	0.579957
chr10	70287921	70288421	chr10	70097121	70097122	0.518385
chr10	70599438	70599938	chr10	70599291	70599292	0.744485
chr10	70830569	70831069	chr10	70599291	70599292	0.712218
chr10	71130176	71130676	chr10	71344849	71344850	0.654827
chr10	71293218	71293718	chr10	71344849	71344850	0.685855
chr10	71308241	71308741	chr10	71344849	71344850	0.575791
chr10	71381223	71381723	chr10	71344849	71344850	0.668489
chr10	71428187	71428687	chr10	71344849	71344850	0.563037
chr10	71462314	71462814	chr10	71344849	71344850	0.588294
chr10	71130176	71130676	chr10	71347793	71347794	0.661101
chr10	71308241	71308741	chr10	71347793	71347794	0.621111
chr10	71381223	71381723	chr10	71347793	71347794	0.647657
chr10	71428187	71428687	chr10	71347793	71347794	0.561972
chr10	71462314	71462814	chr10	71347793	71347794	0.599992
chr10	75446593	75447093	chr10	75316877	75316878	0.618831
chr10	75333461	75333961	chr10	75518042	75518043	0.555887
chr10	75605090	75605590	chr10	75518042	75518043	0.528973
chr10	75605090	75605590	chr10	75764357	75764358	0.532535
chr10	75767671	75768171	chr10	75764357	75764358	0.521368
chr10	76570302	76570802	chr10	76469114	76469115	0.621255
chr10	76584077	76584577	chr10	76469114	76469115	0.532271
chr10	76570302	76570802	chr10	76468971	76468972	0.567348
chr10	77196017	77196517	chr10	77418273	77418274	0.575365
chr10	79675482	79675982	chr10	79682195	79682196	0.696178
chr10	79738975	79739475	chr10	79682195	79682196	0.562191
chr10	79897298	79897798	chr10	79682195	79682196	0.542709
chr10	79912408	79912908	chr10	79682195	79682196	0.532316
chr10	79675482	79675982	chr10	79766952	79766953	0.638694
chr10	79738975	79739475	chr10	79960152	79960153	0.603294
chr10	79897298	79897798	chr10	79960152	79960153	0.520924
chr10	79912408	79912908	chr10	79960152	79960153	0.536426
chr10	79976489	79976989	chr10	79960152	79960153	0.609515
chr10	79977258	79977758	chr10	79960152	79960153	0.538973
chr10	80013622	80014122	chr10	79960152	79960153	0.526313
chr10	80025849	80026349	chr10	79960152	79960153	0.554626
chr10	80028140	80028640	chr10	79960152	79960153	0.550386
chr10	80186407	80186907	chr10	79960152	79960153	0.617151
chr10	79880672	79881172	chr10	80039659	80039660	0.537879
chr10	79897298	79897798	chr10	80039659	80039660	0.508865
chr10	79912408	79912908	chr10	80039659	80039660	0.516322
chr10	79976489	79976989	chr10	80039659	80039660	0.644167
chr10	79977258	79977758	chr10	80039659	80039660	0.574978
chr10	80013622	80014122	chr10	80039659	80039660	0.577578
chr10	80025849	80026349	chr10	80039659	80039660	0.595558
chr10	80028140	80028640	chr10	80039659	80039660	0.544093
chr10	80186407	80186907	chr10	80039659	80039660	0.648827
chr10	79976489	79976989	chr10	80167841	80167842	0.531672
chr10	79977258	79977758	chr10	80167841	80167842	0.525264
chr10	80025849	80026349	chr10	80167841	80167842	0.5065
chr10	80304823	80305323	chr10	80167841	80167842	0.615431
chr10	80395191	80395691	chr10	80167841	80167842	0.563516
chr10	79976489	79976989	chr10	80226598	80226599	0.722093
chr10	79977258	79977758	chr10	80226598	80226599	0.681512
chr10	79991054	79991554	chr10	80226598	80226599	0.549115
chr10	80013622	80014122	chr10	80226598	80226599	0.628866
chr10	80025849	80026349	chr10	80226598	80226599	0.672292
chr10	80028140	80028640	chr10	80226598	80226599	0.579756
chr10	80186407	80186907	chr10	80226598	80226599	0.623767
chr10	80304823	80305323	chr10	80226598	80226599	0.721244
chr10	80395191	80395691	chr10	80226598	80226599	0.753838
chr10	80441463	80441963	chr10	80226598	80226599	0.790355
chr10	80450595	80451095	chr10	80226598	80226599	0.759924
chr10	80028140	80028640	chr10	80249452	80249453	0.508197
chr10	80824181	80824681	chr10	80590341	80590342	0.519067
chr10	80824181	80824681	chr10	80798735	80798736	0.53612
chr10	80824181	80824681	chr10	80798626	80798627	0.580769
chr10	80824181	80824681	chr10	80813498	80813499	0.570946
chr10	80824181	80824681	chr10	80826656	80826657	0.566224
chr10	80824181	80824681	chr10	80900969	80900970	0.505143
chr10	80824181	80824681	chr10	81070083	81070084	0.514505
chr10	80892539	80893039	chr10	81070083	81070084	0.685856
chr10	81018212	81018712	chr10	81070083	81070084	0.598947
chr10	81068707	81069207	chr10	81070083	81070084	0.596724
chr10	81153579	81154079	chr10	81070083	81070084	0.55131
chr10	81154252	81154752	chr10	81070083	81070084	0.530909
chr10	81154252	81154752	chr10	81384428	81384429	0.53761
chr10	81464418	81464918	chr10	81384428	81384429	0.512267
chr10	81465174	81465674	chr10	81384428	81384429	0.513637
chr10	81534772	81535272	chr10	81384428	81384429	0.695867
chr10	81153579	81154079	chr10	81393064	81393065	0.539936
chr10	81534772	81535272	chr10	81393064	81393065	0.608434
chr10	82820946	82821446	chr10	82764141	82764142	0.519569
chr10	82920595	82921095	chr10	82764141	82764142	0.559421
chr10	82768791	82769291	chr10	82812123	82812124	0.680736
chr10	82812411	82812911	chr10	82812123	82812124	0.634791
chr10	82820946	82821446	chr10	82812123	82812124	0.819166
chr10	82866381	82866881	chr10	82812123	82812124	0.744599
chr10	82920595	82921095	chr10	82812123	82812124	0.887957
chr10	82961246	82961746	chr10	82812123	82812124	0.685732
chr10	83004928	83005428	chr10	82812123	82812124	0.518882
chr10	82768791	82769291	chr10	82833951	82833952	0.503421
chr10	82820946	82821446	chr10	82833951	82833952	0.529178
chr10	82920595	82921095	chr10	82833951	82833952	0.567658
chr10	83004332	83004832	chr10	82833951	82833952	0.598818
chr10	83004928	83005428	chr10	82833951	82833952	0.521921
chr10	82820946	82821446	chr10	82985497	82985498	0.587033
chr10	82920595	82921095	chr10	82985497	82985498	0.565374
chr10	83203169	83203669	chr10	82985497	82985498	0.511153
chr10	83203169	83203669	chr10	83337817	83337818	0.72296
chr10	83203169	83203669	chr10	83360221	83360222	0.725553
chr10	84844109	84844609	chr10	84622437	84622438	0.534715
chr10	86079870	86080370	chr10	85871831	85871832	0.571729
chr10	86079870	86080370	chr10	85917142	85917143	0.617991
chr10	86079870	86080370	chr10	85957793	85957794	0.61634
chr10	88135417	88135917	chr10	88146992	88146993	0.636036
chr10	88336741	88337241	chr10	88146992	88146993	0.502318
chr10	88336741	88337241	chr10	88459587	88459588	0.628079
chr10	88456714	88457214	chr10	88459587	88459588	0.910495
chr10	88459347	88459847	chr10	88459587	88459588	0.94706
chr10	88460365	88460865	chr10	88459587	88459588	0.882563
chr10	88717505	88718005	chr10	88826814	88826815	0.824069
chr10	88886169	88886669	chr10	88826814	88826815	0.73237
chr10	89689940	89690440	chr10	89732295	89732296	0.500726
chr10	93795127	93795627	chr10	93897093	93897094	0.572929
chr10	93846078	93846578	chr10	93897093	93897094	0.624069
chr10	93795127	93795627	chr10	94036001	94036002	0.795392
chr10	93846078	93846578	chr10	94036001	94036002	0.86426
chr10	95730982	95731482	chr10	95501938	95501939	0.612453
chr10	95730982	95731482	chr10	95515162	95515163	0.557397
chr10	100619960	100620460	chr10	100589259	100589260	0.612216
chr10	105799778	105800278	chr10	105841380	105841381	0.682023
chr10	105818164	105818664	chr10	105841380	105841381	0.623624
chr10	111782358	111782858	chr10	111972695	111972696	0.544487
chr10	112083131	112083631	chr10	111972695	111972696	0.561913
chr10	115586373	115586873	chr10	115817284	115817285	0.550758
chr10	116113474	116113974	chr10	116113917	116113918	0.917224
chr10	116114069	116114569	chr10	116113917	116113918	0.950147
chr10	116177295	116177795	chr10	116113917	116113918	0.582948
chr10	117023963	117024463	chr10	117063814	117063815	0.505243
chr10	117045666	117046166	chr10	117063814	117063815	0.509488
chr10	117229774	117230274	chr10	117063814	117063815	0.684737
chr10	117229774	117230274	chr10	117224507	117224508	0.536778
chr10	117316558	117317058	chr10	117224507	117224508	0.564997
chr10	117606844	117607344	chr10	117629500	117629501	0.683311
chr10	117662582	117663082	chr10	117629500	117629501	0.56906
chr10	118052392	118052892	chr10	117845974	117845975	0.502043
chr10	120787188	120787688	chr10	120979330	120979331	0.500998
chr10	120903793	120904293	chr10	120979330	120979331	0.558213
chr10	121124435	121124935	chr10	120979330	120979331	0.511377
chr10	121750138	121750638	chr10	121626316	121626317	0.712309
chr10	121853360	121853860	chr10	121626316	121626317	0.679385
chr10	121641905	121642405	chr10	121739937	121739938	0.546222
chr10	121726380	121726880	chr10	121739937	121739938	0.579491
chr10	121750138	121750638	chr10	121739937	121739938	0.778475
chr10	121781157	121781657	chr10	121739937	121739938	0.502051
chr10	121853360	121853860	chr10	121739937	121739938	0.875544
chr10	121902509	121903009	chr10	121739937	121739938	0.611013
chr10	126663417	126663917	chr10	126901371	126901372	0.683744
chr10	126770919	126771419	chr10	126901371	126901372	0.600769
chr10	126826184	126826684	chr10	126901371	126901372	0.84021
chr10	126832960	126833460	chr10	126901371	126901372	0.575742
chr10	126853226	126853726	chr10	126901371	126901372	0.516842
chr10	126945527	126946027	chr10	126901371	126901372	0.801751
chr10	126949442	126949942	chr10	126901371	126901372	0.545543
chr10	127010574	127011074	chr10	126901371	126901372	0.50617
chr10	127114598	127115098	chr10	126901371	126901372	0.769453
chr10	127018254	127018754	chr10	127263363	127263364	0.523766
chr10	127114598	127115098	chr10	127263363	127263364	0.782455
chr10	127183688	127184188	chr10	127263363	127263364	0.670809
chr10	127262390	127262890	chr10	127263363	127263364	0.612443
chr10	127369717	127370217	chr10	127263363	127263364	0.757804
chr10	127114598	127115098	chr10	127311786	127311787	0.661929
chr10	127183688	127184188	chr10	127311786	127311787	0.518565
chr10	127369717	127370217	chr10	127311786	127311787	0.630031
chr10	127519929	127520429	chr10	127311786	127311787	0.574774
chr10	127369717	127370217	chr10	127522444	127522445	0.729276
chr10	127519929	127520429	chr10	127522444	127522445	0.642802
chr10	127653201	127653701	chr10	127522444	127522445	0.54513
chr10	127713895	127714395	chr10	127522444	127522445	0.612067
chr10	127750313	127750813	chr10	127522444	127522445	0.544149
chr10	127519929	127520429	chr10	127666703	127666704	0.512928
chr10	127713895	127714395	chr10	127666703	127666704	0.53516
chr10	127519929	127520429	chr10	127667123	127667124	0.526105
chr10	127713895	127714395	chr10	127667123	127667124	0.505267
chr10	128254236	128254736	chr10	128091610	128091611	0.621512
chr10	128262250	128262750	chr10	128091610	128091611	0.64558
chr10	128254236	128254736	chr10	128337832	128337833	0.616002
chr10	128262250	128262750	chr10	128337832	128337833	0.623961
chr10	128515886	128516386	chr10	128337832	128337833	0.519413
chr10	128584398	128584898	chr10	128337832	128337833	0.643491
chr10	128584398	128584898	chr10	128821631	128821632	0.67137
chr10	128737349	128737849	chr10	128821631	128821632	0.51897
chr10	128958633	128959133	chr10	128821631	128821632	0.631901
chr11	3471307	3471807	chr11	3289131	3289132	0.549673
chr11	3471307	3471807	chr11	3409238	3409239	0.509338
chr11	4031735	4032235	chr11	3963975	3963976	0.684354
chr11	4035285	4035785	chr11	3963975	3963976	0.593304
chr11	4031735	4032235	chr11	4160354	4160355	0.599086
chr11	4035285	4035785	chr11	4160354	4160355	0.558751
chr11	4440911	4441411	chr11	4441103	4441104	0.920482
chr11	4605414	4605914	chr11	4441103	4441104	0.831696
chr11	4622932	4623432	chr11	4441103	4441104	0.832239
chr11	4440911	4441411	chr11	4594815	4594816	0.589648
chr11	4622932	4623432	chr11	4594815	4594816	0.548171
chr11	4882932	4883432	chr11	4637793	4637794	0.502114
chr11	4883798	4884298	chr11	4948064	4948065	0.746985
chr11	4946922	4947422	chr11	4948064	4948065	0.507198
chr11	5059753	5060253	chr11	4948064	4948065	0.607902
chr11	5062480	5062980	chr11	4948064	4948065	0.687882
chr11	5158012	5158512	chr11	4948064	4948065	0.702417
chr11	5160669	5161169	chr11	4948064	4948065	0.819663
chr11	5897490	5897990	chr11	5955758	5955759	0.50096
chr11	6706386	6706886	chr11	6626067	6626068	0.767058
chr11	6706386	6706886	chr11	6658533	6658534	0.606831
chr11	8773206	8773706	chr11	9011191	9011192	0.583349
chr11	9149762	9150262	chr11	9011191	9011192	0.606956
chr11	9150357	9150857	chr11	9011191	9011192	0.600327
chr11	9149762	9150262	chr11	9118008	9118009	0.808131
chr11	9150357	9150857	chr11	9118008	9118009	0.806061
chr11	11684835	11685335	chr11	11462419	11462420	0.561554
chr11	23846388	23846888	chr11	23665674	23665675	0.569419
chr11	23845708	23846208	chr11	24078056	24078057	0.604058
chr11	23846388	23846888	chr11	24078056	24078057	0.678724
chr11	24164543	24165043	chr11	24078056	24078057	0.73832
chr11	31965612	31966112	chr11	32205415	32205416	0.505428
chr11	32560438	32560938	chr11	32533266	32533267	0.556771
chr11	32580442	32580942	chr11	32533266	32533267	0.754035
chr11	32614481	32614981	chr11	32533266	32533267	0.594505
chr11	35707365	35707865	chr11	35834528	35834529	0.760471
chr11	35797648	35798148	chr11	35834528	35834529	0.507273
chr11	40536431	40536931	chr11	40695203	40695204	0.570124
chr11	40600064	40600564	chr11	40695203	40695204	0.563031
chr11	45979862	45980362	chr11	45944935	45944936	0.500371
chr11	45979862	45980362	chr11	45980310	45980311	0.64131
chr11	49958007	49958507	chr11	50174444	50174445	0.54222
chr11	50233964	50234464	chr11	50174444	50174445	0.557518
chr11	51177259	51177759	chr11	51263046	51263047	0.523386
chr11	51219636	51220136	chr11	51263046	51263047	0.775672
chr11	52186928	52187428	chr11	51967631	51967632	0.517354
chr11	52186928	52187428	chr11	52283014	52283015	0.548074
chr11	54355574	54356074	chr11	54522845	54522846	0.544726
chr11	58239454	58239954	chr11	58009064	58009065	0.582141
chr11	58316043	58316543	chr11	58168539	58168540	0.580298
chr11	58316043	58316543	chr11	58171654	58171655	0.529302
chr11	58961608	58962108	chr11	59163745	59163746	0.512072
chr11	58961608	58962108	chr11	59191952	59191953	0.555569
chr11	59375409	59375909	chr11	59191952	59191953	0.560869
chr11	58961608	58962108	chr11	59202486	59202487	0.50945
chr11	59375409	59375909	chr11	59202486	59202487	0.523052
chr11	59375409	59375909	chr11	59450045	59450046	0.521405
chr11	59787426	59787926	chr11	59787657	59787658	0.568736
chr11	60188619	60189119	chr11	60046489	60046490	0.555049
chr11	60088241	60088741	chr11	60105013	60105014	0.521769
chr11	60899024	60899524	chr11	60811265	60811266	0.739546
chr11	60899024	60899524	chr11	60830631	60830632	0.606522
chr11	60899024	60899524	chr11	60879038	60879039	0.616721
chr11	61336573	61337073	chr11	61579687	61579688	0.656901
chr11	62757927	62758427	chr11	62731905	62731906	0.795121
chr11	63926873	63927373	chr11	64079472	64079473	0.605705
chr11	64111127	64111627	chr11	64079472	64079473	0.538808
chr11	64955076	64955576	chr11	64979035	64979036	0.582324
chr11	65158006	65158506	chr11	64979035	64979036	0.666584
chr11	64955076	64955576	chr11	65162961	65162962	0.679596
chr11	65158006	65158506	chr11	65162961	65162962	0.817302
chr11	67695218	67695718	chr11	67922153	67922154	0.584907
chr11	67770738	67771238	chr11	67922153	67922154	0.603146
chr11	68956592	68957092	chr11	68956858	68956859	0.717644
chr11	69211378	69211878	chr11	68975185	68975186	0.51624
chr11	69477640	69478140	chr11	69395791	69395792	0.520539
chr11	69715428	69715928	chr11	69632971	69632972	0.559833
chr11	69477640	69478140	chr11	69655037	69655038	0.718543
chr11	69654746	69655246	chr11	69655037	69655038	0.511316
chr11	69715428	69715928	chr11	69655037	69655038	0.532268
chr11	69816671	69817171	chr11	69655037	69655038	0.612444
chr11	69477640	69478140	chr11	69672423	69672424	0.532156
chr11	69715428	69715928	chr11	69672423	69672424	0.518872
chr11	69477640	69478140	chr11	69682084	69682085	0.661138
chr11	69816671	69817171	chr11	69682084	69682085	0.506547
chr11	69816671	69817171	chr11	69921958	69921959	0.581486
chr11	70097380	70097880	chr11	69921958	69921959	0.57604
chr11	70135856	70136356	chr11	69921958	69921959	0.675431
chr11	70169373	70169873	chr11	69921958	69921959	0.542233
chr11	69816671	69817171	chr11	69995766	69995767	0.545099
chr11	70097380	70097880	chr11	69995766	69995767	0.520402
chr11	70135856	70136356	chr11	69995766	69995767	0.629621
chr11	70215335	70215835	chr11	69995766	69995767	0.510771
chr11	70097380	70097880	chr11	70130357	70130358	0.60702
chr11	70135856	70136356	chr11	70130357	70130358	0.794236
chr11	70169373	70169873	chr11	70130357	70130358	0.633275
chr11	70213667	70214167	chr11	70130357	70130358	0.529812
chr11	70226442	70226942	chr11	70130357	70130358	0.53152
chr11	70097380	70097880	chr11	70213910	70213911	0.639898
chr11	70135856	70136356	chr11	70213910	70213911	0.819681
chr11	70169373	70169873	chr11	70213910	70213911	0.571869
chr11	70213667	70214167	chr11	70213910	70213911	0.547834
chr11	70214371	70214871	chr11	70213910	70213911	0.505752
chr11	70215335	70215835	chr11	70213910	70213911	0.543524
chr11	70226442	70226942	chr11	70213910	70213911	0.540515
chr11	70135856	70136356	chr11	70239830	70239831	0.572388
chr11	70215335	70215835	chr11	70410031	70410032	0.52308
chr11	70226442	70226942	chr11	70410031	70410032	0.50883
chr11	70321573	70322073	chr11	70525357	70525358	0.511791
chr11	70321573	70322073	chr11	70562881	70562882	0.567489
chr11	72977069	72977569	chr11	73047867	73047868	0.522523
chr11	72977069	72977569	chr11	73177042	73177043	0.608375
chr11	73329368	73329868	chr11	73177042	73177043	0.593805
chr11	74619658	74620158	chr11	74770863	74770864	0.50549
chr11	75070926	75071426	chr11	74898080	74898081	0.623864
chr11	75234744	75235244	chr11	75454717	75454718	0.557784
chr11	75903411	75903911	chr11	75999912	75999913	0.568644
chr11	75965802	75966302	chr11	75999912	75999913	0.50571
chr11	75990790	75991290	chr11	75999912	75999913	0.691505
chr11	75990790	75991290	chr11	76217613	76217614	0.515947
chr11	77471272	77471772	chr11	77493412	77493413	0.533225
chr11	77917190	77917690	chr11	77777235	77777236	0.501222
chr11	77917190	77917690	chr11	77893872	77893873	0.556189
chr11	77917190	77917690	chr11	78032313	78032314	0.701518
chr11	77859036	77859536	chr11	78094673	78094674	0.515284
chr11	77859640	77860140	chr11	78094673	78094674	0.504457
chr11	77876567	77877067	chr11	78094673	78094674	0.513935
chr11	77917190	77917690	chr11	78094673	78094674	0.605999
chr11	78358272	78358772	chr11	78245703	78245704	0.690553
chr11	78358272	78358772	chr11	78261754	78261755	0.692568
chr11	78358272	78358772	chr11	78512168	78512169	0.765183
chr11	78358272	78358772	chr11	78512296	78512297	0.547468
chr11	78896690	78897190	chr11	78697425	78697426	0.518355
chr11	78896690	78897190	chr11	78826595	78826596	0.554714
chr11	79660961	79661461	chr11	79591212	79591213	0.595058
chr11	83863773	83864273	chr11	84068577	84068578	0.82801
chr11	84570287	84570787	chr11	84513501	84513502	0.547773
chr11	84599209	84599709	chr11	84513501	84513502	0.515923
chr11	84957520	84958020	chr11	84870779	84870780	0.670951
chr11	85111024	85111524	chr11	84870779	84870780	0.692524
chr11	84957520	84958020	chr11	84880220	84880221	0.587937
chr11	85111024	85111524	chr11	84880220	84880221	0.611513
chr11	84957520	84958020	chr11	84880285	84880286	0.57226
chr11	85111024	85111524	chr11	84880285	84880286	0.657844
chr11	84957520	84958020	chr11	84916356	84916357	0.574048
chr11	85111024	85111524	chr11	84916356	84916357	0.607011
chr11	85111024	85111524	chr11	85311254	85311255	0.698536
chr11	85268543	85269043	chr11	85311254	85311255	0.559408
chr11	86412498	86412998	chr11	86257568	86257569	0.553582
chr11	86453930	86454430	chr11	86257568	86257569	0.565913
chr11	86453930	86454430	chr11	86683983	86683984	0.636391
chr11	86630549	86631049	chr11	86683983	86683984	0.534339
chr11	86630549	86631049	chr11	86807660	86807661	0.584748
chr11	86920435	86920935	chr11	87074137	87074138	0.54456
chr11	87404785	87405285	chr11	87405065	87405066	0.648193
chr11	87763563	87764063	chr11	87737565	87737566	0.597719
chr11	87847824	87848324	chr11	87737565	87737566	0.57384
chr11	87763563	87764063	chr11	87998298	87998299	0.547687
chr11	88215186	88215686	chr11	87998298	87998299	0.532128
chr11	89105720	89106220	chr11	88973864	88973865	0.586205
chr11	93982488	93982988	chr11	93885766	93885767	0.723983
chr11	93982488	93982988	chr11	93956256	93956257	0.500321
chr11	93982488	93982988	chr11	93968521	93968522	0.742164
chr11	94138314	94138814	chr11	93968521	93968522	0.57295
chr11	95866784	95867284	chr11	95666957	95666958	0.528795
chr11	95875659	95876159	chr11	95666957	95666958	0.718618
chr11	95866784	95867284	chr11	96005944	96005945	0.643315
chr11	95875659	95876159	chr11	96005944	96005945	0.862584
chr11	95866784	95867284	chr11	96034917	96034918	0.526226
chr11	95875659	95876159	chr11	96034917	96034918	0.746682
chr11	95875659	95876159	chr11	96075694	96075695	0.59782
chr11	97066330	97066830	chr11	96916514	96916515	0.621356
chr11	97066882	97067382	chr11	96916514	96916515	0.77541
chr11	97066330	97066830	chr11	96944019	96944020	0.64316
chr11	97066882	97067382	chr11	96944019	96944020	0.658362
chr11	97066330	97066830	chr11	97315716	97315717	0.594383
chr11	97066882	97067382	chr11	97315716	97315717	0.611239
chr11	97333008	97333508	chr11	97362551	97362552	0.56689
chr11	97883422	97883922	chr11	97685596	97685597	0.505621
chr11	98004950	98005450	chr11	98022627	98022628	0.76552
chr11	98066509	98067009	chr11	98022627	98022628	0.584436
chr11	98067216	98067716	chr11	98022627	98022628	0.770502
chr11	98004950	98005450	chr11	98150163	98150164	0.706778
chr11	98057992	98058492	chr11	98150163	98150164	0.515831
chr11	98066509	98067009	chr11	98150163	98150164	0.534164
chr11	98067216	98067716	chr11	98150163	98150164	0.776232
chr11	98004950	98005450	chr11	98203305	98203306	0.585387
chr11	98067216	98067716	chr11	98203305	98203306	0.572624
chr11	98446741	98447241	chr11	98446834	98446835	0.516615
chr11	99025806	99026306	chr11	98836785	98836786	0.504822
chr11	99437743	99438243	chr11	99422259	99422260	0.504899
chr11	100657187	100657687	chr11	100712467	100712468	0.540091
chr11	101076456	101076956	chr11	101316251	101316252	0.571685
chr11	101264966	101265466	chr11	101316251	101316252	0.545664
chr11	101335639	101336139	chr11	101316251	101316252	0.507859
chr11	101604351	101604851	chr11	101732956	101732957	0.520073
chr11	101720136	101720636	chr11	101732956	101732957	0.599781
chr11	101885881	101886381	chr11	101732956	101732957	0.51079
chr11	101616927	101617427	chr11	101785310	101785311	0.558601
chr11	101720136	101720636	chr11	101785310	101785311	0.772149
chr11	102659325	102659825	chr11	102880975	102880976	0.518757
chr11	103138166	103138666	chr11	102946461	102946462	0.771964
chr11	103150861	103151361	chr11	102946461	102946462	0.747031
chr11	103627424	103627924	chr11	103614739	103614740	0.93652
chr11	103730480	103730980	chr11	103614739	103614740	0.775626
chr11	103749670	103750170	chr11	103614739	103614740	0.588427
chr11	103771508	103772008	chr11	103614739	103614740	0.580362
chr11	103773859	103774359	chr11	103614739	103614740	0.752507
chr11	103795291	103795791	chr11	103614739	103614740	0.777533
chr11	103730480	103730980	chr11	103954056	103954057	0.510422
chr11	103773859	103774359	chr11	103954056	103954057	0.55272
chr11	105164451	105164951	chr11	105178807	105178808	0.550388
chr11	105165049	105165549	chr11	105178807	105178808	0.53908
chr11	105955718	105956218	chr11	106202178	106202179	0.723365
chr11	106018599	106019099	chr11	106202178	106202179	0.711582
chr11	106020341	106020841	chr11	106202178	106202179	0.580265
chr11	106330338	106330838	chr11	106202178	106202179	0.658884
chr11	106018599	106019099	chr11	106255802	106255803	0.763236
chr11	106020341	106020841	chr11	106255802	106255803	0.723371
chr11	106330338	106330838	chr11	106255802	106255803	0.726072
chr11	106018599	106019099	chr11	106256185	106256186	0.670794
chr11	106020341	106020841	chr11	106256185	106256186	0.565867
chr11	106330338	106330838	chr11	106256185	106256186	0.682055
chr11	106330338	106330838	chr11	106276672	106276673	0.841599
chr11	106972133	106972633	chr11	106999525	106999526	0.512926
chr11	107014682	107015182	chr11	106999525	106999526	0.532437
chr11	107287158	107287658	chr11	107479528	107479529	0.752575
chr11	107319854	107320354	chr11	107479528	107479529	0.533749
chr11	107379469	107379969	chr11	107479528	107479529	0.652995
chr11	107686262	107686762	chr11	107479528	107479529	0.676167
chr11	109170740	109171240	chr11	109362794	109362795	0.633731
chr11	109686747	109687247	chr11	109649405	109649406	0.558517
chr11	109686747	109687247	chr11	109828046	109828047	0.770515
chr11	109853511	109854011	chr11	109828046	109828047	0.546168
chr11	113833097	113833597	chr11	113684151	113684152	0.515076
chr11	113833097	113833597	chr11	113684406	113684407	0.65093
chr11	113874705	113875205	chr11	113684406	113684407	0.586905
chr11	113903111	113903611	chr11	113684406	113684407	0.680908
chr11	115103449	115103949	chr11	115163341	115163342	0.718821
chr11	115469704	115470204	chr11	115603916	115603917	0.583761
chr11	115393645	115394145	chr11	115604151	115604152	0.526975
chr11	116307747	116308247	chr11	116413032	116413033	0.512691
chr11	116704723	116705223	chr11	116531911	116531912	0.514261
chr11	116705331	116705831	chr11	116531911	116531912	0.583367
chr11	116725180	116725680	chr11	116531911	116531912	0.548548
chr11	116515517	116516017	chr11	116581447	116581448	0.572376
chr11	116704723	116705223	chr11	116581447	116581448	0.524854
chr11	116705331	116705831	chr11	116581447	116581448	0.614474
chr11	116725180	116725680	chr11	116581447	116581448	0.640724
chr11	116705331	116705831	chr11	116843449	116843450	0.533287
chr11	117425836	117426336	chr11	117654289	117654290	0.546617
chr11	119007668	119008168	chr11	119023021	119023022	0.726345
chr11	119081076	119081576	chr11	119023021	119023022	0.734413
chr11	119111291	119111791	chr11	119023021	119023022	0.602079
chr11	119146081	119146581	chr11	119023021	119023022	0.579277
chr11	119159422	119159922	chr11	119023021	119023022	0.762247
chr11	119183910	119184410	chr11	119023021	119023022	0.644363
chr11	119184444	119184944	chr11	119023021	119023022	0.50388
chr11	119081076	119081576	chr11	119300043	119300044	0.588644
chr11	119111291	119111791	chr11	119300043	119300044	0.543441
chr11	119159422	119159922	chr11	119300043	119300044	0.729139
chr11	119183910	119184410	chr11	119300043	119300044	0.545075
chr11	120297725	120298225	chr11	120098934	120098935	0.549455
chr11	120647173	120647673	chr11	120598365	120598366	0.546761
chr11	120647173	120647673	chr11	120796395	120796396	0.561027
chr11	121118088	121118588	chr11	121118677	121118678	0.786278
chr11	121145794	121146294	chr11	121118677	121118678	0.679826
chr11	121156664	121157164	chr11	121118677	121118678	0.502566
chr11	121118088	121118588	chr11	121146143	121146144	0.732276
chr11	121145794	121146294	chr11	121146143	121146144	0.853119
chr12	3387845	3388345	chr12	3235526	3235527	0.539875
chr12	3387845	3388345	chr12	3309969	3309970	0.611943
chr12	3788568	3789068	chr12	3572391	3572392	0.534089
chr12	16665055	16665555	chr12	16589770	16589771	0.564948
chr12	18387100	18387600	chr12	18514510	18514511	0.795254
chr12	18387736	18388236	chr12	18514510	18514511	0.68915
chr12	24777070	24777570	chr12	24572287	24572288	0.848424
chr12	30597832	30598332	chr12	30584443	30584444	0.630744
chr12	31631159	31631659	chr12	31634658	31634659	0.54308
chr12	33330277	33330777	chr12	33394854	33394855	0.653314
chr12	33345288	33345788	chr12	33394854	33394855	0.641701
chr12	33450512	33451012	chr12	33394854	33394855	0.809589
chr12	33450512	33451012	chr12	33429624	33429625	0.548132
chr12	55420153	55420653	chr12	55384222	55384223	0.527003
chr12	65225731	65226231	chr12	65073938	65073939	0.568273
chr12	65251542	65252042	chr12	65073938	65073939	0.546043
chr12	65225731	65226231	chr12	65075606	65075607	0.537452
chr12	65251542	65252042	chr12	65075606	65075607	0.598634
chr12	66283674	66284174	chr12	66284401	66284402	0.93655
chr12	66284228	66284728	chr12	66284401	66284402	0.973607
chr12	67221756	67222256	chr12	67222549	67222550	0.555735
chr12	72198006	72198506	chr12	72409054	72409055	0.612956
chr12	72303836	72304336	chr12	72409054	72409055	0.764552
chr12	72393332	72393832	chr12	72409054	72409055	0.655021
chr12	72303836	72304336	chr12	72536357	72536358	0.530663
chr12	72917152	72917652	chr12	72940772	72940773	0.543409
chr12	72917654	72918154	chr12	72940772	72940773	0.797802
chr12	72939638	72940138	chr12	72940772	72940773	0.527549
chr12	72917654	72918154	chr12	73113245	73113246	0.756409
chr12	72939638	72940138	chr12	73113245	73113246	0.508358
chr12	73034925	73035425	chr12	73113245	73113246	0.556618
chr12	73791379	73791879	chr12	73584796	73584797	0.553045
chr12	73791379	73791879	chr12	73964530	73964531	0.564872
chr12	74055178	74055678	chr12	73964530	73964531	0.580364
chr12	80273333	80273833	chr12	80463095	80463096	0.551682
chr12	80739425	80739925	chr12	80643861	80643862	0.57645
chr12	81731744	81732244	chr12	81485137	81485138	0.521084
chr12	83620831	83621331	chr12	83597147	83597148	0.555142
chr12	83771710	83772210	chr12	83597147	83597148	0.555431
chr12	83771710	83772210	chr12	83950608	83950609	0.543019
chr12	84593737	84594237	chr12	84417200	84417201	0.553972
chr12	84613694	84614194	chr12	84417200	84417201	0.584668
chr12	86687955	86688455	chr12	86726460	86726461	0.564397
chr12	86688573	86689073	chr12	86726460	86726461	0.636925
chr12	86760972	86761472	chr12	86726460	86726461	0.545012
chr12	87026214	87026714	chr12	87147165	87147166	0.532403
chr12	87026214	87026714	chr12	87200543	87200544	0.628848
chr12	87010575	87011075	chr12	87238601	87238602	0.679525
chr12	87026214	87026714	chr12	87238601	87238602	0.530221
chr12	87157357	87157857	chr12	87238601	87238602	0.514871
chr12	87224880	87225380	chr12	87238601	87238602	0.784165
chr12	87026214	87026714	chr12	87266728	87266729	0.521184
chr12	87224880	87225380	chr12	87472299	87472300	0.551152
chr12	99817920	99818420	chr12	99884515	99884516	0.534242
chr12	99972552	99973052	chr12	99884515	99884516	0.507023
chr12	99972552	99973052	chr12	100110202	100110203	0.757239
chr12	100235380	100235880	chr12	100110202	100110203	0.737402
chr12	99972552	99973052	chr12	100159653	100159654	0.57978
chr12	100235380	100235880	chr12	100159653	100159654	0.588678
chr12	100878096	100878596	chr12	101028983	101028984	0.623914
chr12	102554954	102555454	chr12	102757975	102757976	0.518176
chr12	102722391	102722891	chr12	102757975	102757976	0.585122
chr12	102722391	102722891	chr12	102899306	102899307	0.88284
chr12	102730353	102730853	chr12	102899306	102899307	0.592055
chr12	104029920	104030420	chr12	104112724	104112725	0.516912
chr12	104443642	104444142	chr12	104473236	104473237	0.573236
chr12	104448100	104448600	chr12	104473236	104473237	0.554278
chr12	104519351	104519851	chr12	104473236	104473237	0.924241
chr12	104546090	104546590	chr12	104473236	104473237	0.810574
chr12	104597996	104598496	chr12	104473236	104473237	0.784041
chr12	104614148	104614648	chr12	104473236	104473237	0.751567
chr12	104677164	104677664	chr12	104473236	104473237	0.654048
chr12	104519351	104519851	chr12	104751952	104751953	0.679756
chr12	104546090	104546590	chr12	104751952	104751953	0.586511
chr12	104597996	104598496	chr12	104751952	104751953	0.507727
chr12	104614148	104614648	chr12	104751952	104751953	0.620681
chr12	104677164	104677664	chr12	104751952	104751953	0.527322
chr12	105053994	105054494	chr12	105032618	105032619	0.533568
chr12	105063081	105063581	chr12	105032618	105032619	0.503693
chr12	105222543	105223043	chr12	105032618	105032619	0.542807
chr12	105048583	105049083	chr12	105222737	105222738	0.644855
chr12	105053994	105054494	chr12	105222737	105222738	0.862372
chr12	105063081	105063581	chr12	105222737	105222738	0.837758
chr12	105063694	105064194	chr12	105222737	105222738	0.733077
chr12	105222543	105223043	chr12	105222737	105222738	0.887124
chr12	105284075	105284575	chr12	105222737	105222738	0.862825
chr12	105332518	105333018	chr12	105222737	105222738	0.878033
chr12	105467889	105468389	chr12	105222737	105222738	0.554984
chr12	105534852	105535352	chr12	105685352	105685353	0.63628
chr12	105592217	105592717	chr12	105685352	105685353	0.565766
chr12	105718370	105718870	chr12	105685352	105685353	0.519183
chr12	105734142	105734642	chr12	105685352	105685353	0.569012
chr12	105858161	105858661	chr12	105685352	105685353	0.550251
chr12	110976896	110977396	chr12	110889145	110889146	0.731797
chr12	110976896	110977396	chr12	110889264	110889265	0.556477
chr12	111423520	111424020	chr12	111406809	111406810	0.742312
chr12	111971299	111971799	chr12	111813879	111813880	0.612421
chr12	111971299	111971799	chr12	111908055	111908056	0.512582
chr12	111971299	111971799	chr12	111971559	111971560	0.877333
chr12	112112908	112113408	chr12	111971559	111971560	0.556964
chr12	112144266	112144766	chr12	111971559	111971560	0.532726
chr12	112840395	112840895	chr12	112760655	112760656	0.608145
chr12	117345295	117345795	chr12	117516479	117516480	0.5381
chr12	117447227	117447727	chr12	117516479	117516480	0.616144
chr12	117447847	117448347	chr12	117516479	117516480	0.693744
chr12	117533525	117534025	chr12	117516479	117516480	0.593127
chr12	117534187	117534687	chr12	117516479	117516480	0.61063
chr12	117778622	117779122	chr12	117843861	117843862	0.831109
chr12	117788459	117788959	chr12	117843861	117843862	0.529667
chr12	117809716	117810216	chr12	117843861	117843862	0.829627
chr12	117843421	117843921	chr12	117843861	117843862	0.648613
chr13	3457228	3457728	chr13	3611108	3611109	0.665303
chr13	3531874	3532374	chr13	3611108	3611109	0.585435
chr13	3636795	3637295	chr13	3611108	3611109	0.583756
chr13	9233810	9234310	chr13	8996012	8996013	0.741071
chr13	12105789	12106289	chr13	12258113	12258114	0.515364
chr13	12176426	12176926	chr13	12258113	12258114	0.57842
chr13	12261867	12262367	chr13	12258113	12258114	0.677174
chr13	12263949	12264449	chr13	12258113	12258114	0.589657
chr13	12261867	12262367	chr13	12340732	12340733	0.675686
chr13	12263949	12264449	chr13	12340732	12340733	0.5871
chr13	12525979	12526479	chr13	12340732	12340733	0.676411
chr13	12527122	12527622	chr13	12340732	12340733	0.642066
chr13	12540082	12540582	chr13	12340732	12340733	0.615452
chr13	12176426	12176926	chr13	12395375	12395376	0.680375
chr13	12261867	12262367	chr13	12395375	12395376	0.845996
chr13	12263949	12264449	chr13	12395375	12395376	0.75088
chr13	12525979	12526479	chr13	12395375	12395376	0.830662
chr13	12527122	12527622	chr13	12395375	12395376	0.838644
chr13	12540082	12540582	chr13	12395375	12395376	0.788769
chr13	13964869	13965369	chr13	14063401	14063402	0.501231
chr13	19265262	19265762	chr13	19395813	19395814	0.667134
chr13	23933616	23934116	chr13	23745521	23745522	0.581208
chr13	23934375	23934875	chr13	23745521	23745522	0.595085
chr13	23933616	23934116	chr13	23763668	23763669	0.52013
chr13	23934375	23934875	chr13	23763668	23763669	0.555778
chr13	24856674	24857174	chr13	24831489	24831490	0.530116
chr13	24906080	24906580	chr13	24831489	24831490	0.55994
chr13	24743044	24743544	chr13	24831659	24831660	0.596962
chr13	24856674	24857174	chr13	24831659	24831660	0.654452
chr13	24906080	24906580	chr13	24831659	24831660	0.610161
chr13	29956918	29957418	chr13	29986063	29986064	0.597319
chr13	30080524	30081024	chr13	29986063	29986064	0.553546
chr13	30947490	30947990	chr13	30947761	30947762	0.935238
chr13	35189189	35189689	chr13	35212048	35212049	0.593099
chr13	35211842	35212342	chr13	35212048	35212049	0.803122
chr13	37344953	37345453	chr13	37345345	37345346	0.585365
chr13	41114124	41114624	chr13	41001010	41001011	0.606671
chr13	41311733	41312233	chr13	41249844	41249845	0.734018
chr13	44846908	44847408	chr13	45002096	45002097	0.597141
chr13	46758593	46759093	chr13	46727849	46727850	0.746495
chr13	46810028	46810528	chr13	46727849	46727850	0.509543
chr13	47004915	47005415	chr13	47014850	47014851	0.611162
chr13	48490446	48490946	chr13	48261427	48261428	0.609192
chr13	48497866	48498366	chr13	48261427	48261428	0.565996
chr13	49762171	49762671	chr13	49653078	49653079	0.835763
chr13	49814392	49814892	chr13	49653078	49653079	0.737723
chr13	49762171	49762671	chr13	49682130	49682131	0.681328
chr13	49814392	49814892	chr13	49682130	49682131	0.587901
chr13	50964863	50965363	chr13	51100880	51100881	0.544268
chr13	51743786	51744286	chr13	51793747	51793748	0.569361
chr13	51762649	51763149	chr13	51793747	51793748	0.610613
chr13	54391900	54392400	chr13	54590074	54590075	0.734139
chr13	54577626	54578126	chr13	54590074	54590075	0.502386
chr13	54792781	54793281	chr13	54590074	54590075	0.524651
chr13	54805369	54805869	chr13	54590074	54590075	0.572496
chr13	54834791	54835291	chr13	54590074	54590075	0.696316
chr13	54391900	54392400	chr13	54621784	54621785	0.543229
chr13	54834791	54835291	chr13	54621784	54621785	0.562461
chr13	54622117	54622617	chr13	54693960	54693961	0.52911
chr13	55384803	55385303	chr13	55209782	55209783	0.54132
chr13	55384803	55385303	chr13	55362783	55362784	0.509795
chr13	55378856	55379356	chr13	55464267	55464268	0.577144
chr13	55477481	55477981	chr13	55464267	55464268	0.740655
chr13	55378856	55379356	chr13	55536658	55536659	0.564843
chr13	55477481	55477981	chr13	55634999	55635000	0.697548
chr13	58070727	58071227	chr13	58215653	58215654	0.611012
chr13	58225513	58226013	chr13	58354862	58354863	0.595718
chr13	65176424	65176924	chr13	65205968	65205969	0.590141
chr13	65237182	65237682	chr13	65205968	65205969	0.816325
chr13	65259463	65259963	chr13	65205968	65205969	0.596635
chr13	65348400	65348900	chr13	65205968	65205969	0.902269
chr13	66519372	66519872	chr13	66752929	66752930	0.944435
chr13	66563633	66564133	chr13	66752929	66752930	0.972743
chr13	66680645	66681145	chr13	66752929	66752930	0.947827
chr13	66698033	66698533	chr13	66752929	66752930	0.965006
chr13	66807578	66808078	chr13	66752929	66752930	0.930774
chr13	74440014	74440514	chr13	74208700	74208701	0.668913
chr13	74399413	74399913	chr13	74317326	74317327	0.545106
chr13	74399413	74399913	chr13	74639872	74639873	0.528803
chr13	74440014	74440514	chr13	74639872	74639873	0.61219
chr13	81689520	81690020	chr13	81711013	81711014	0.553494
chr13	81816527	81817027	chr13	81711013	81711014	0.666367
chr13	95215757	95216257	chr13	95375357	95375358	0.57489
chr13	95430523	95431023	chr13	95375357	95375358	0.558032
chr13	96941176	96941676	chr13	97067287	97067288	0.787585
chr13	97064826	97065326	chr13	97067287	97067288	0.624384
chr13	97207959	97208459	chr13	97067287	97067288	0.536987
chr13	97223879	97224379	chr13	97067287	97067288	0.635185
chr13	99881715	99882215	chr13	99900683	99900684	0.899921
chr13	99881715	99882215	chr13	100123205	100123206	0.537531
chr13	100397927	100398427	chr13	100616971	100616972	0.693243
chr13	100416933	100417433	chr13	100616971	100616972	0.61568
chr13	104918658	104919158	chr13	105082122	105082123	0.567507
chr13	105081855	105082355	chr13	105082122	105082123	0.872234
chr13	105249597	105250097	chr13	105082122	105082123	0.532276
chr13	105081855	105082355	chr13	105294818	105294819	0.505428
chr13	108132115	108132615	chr13	108158738	108158739	0.547385
chr13	108309273	108309773	chr13	108158738	108158739	0.681951
chr13	108319457	108319957	chr13	108158738	108158739	0.65992
chr13	112651648	112652148	chr13	112652310	112652311	0.873494
chr13	112652194	112652694	chr13	112652310	112652311	0.953118
chr13	117220377	117220877	chr13	117220573	117220574	0.572386
chr13	119258475	119258975	chr13	119462759	119462760	0.612508
chr13	119258475	119258975	chr13	119488039	119488040	0.597624
chr14	30559404	30559904	chr14	30714849	30714850	0.618868
chr14	31310616	31311116	chr14	31251218	31251219	0.663106
chr14	31929299	31929799	chr14	32085692	32085693	0.59493
chr14	32317843	32318343	chr14	32085692	32085693	0.614598
chr14	32317843	32318343	chr14	32322019	32322020	0.566812
chr14	34591263	34591763	chr14	34673928	34673929	0.600718
chr14	34607335	34607835	chr14	34673928	34673929	0.593022
chr14	34614937	34615437	chr14	34673928	34673929	0.674599
chr14	34769562	34770062	chr14	34673928	34673929	0.513959
chr14	34822720	34823220	chr14	34673928	34673929	0.515099
chr14	37355788	37356288	chr14	37135322	37135323	0.689236
chr14	45078903	45079403	chr14	45220328	45220329	0.609478
chr14	45309740	45310240	chr14	45220328	45220329	0.605838
chr14	45309740	45310240	chr14	45219717	45219718	0.60243
chr14	45078903	45079403	chr14	45318572	45318573	0.619175
chr14	45309740	45310240	chr14	45318572	45318573	0.578499
chr14	45309740	45310240	chr14	45388796	45388797	0.766623
chr14	45444160	45444660	chr14	45388796	45388797	0.570132
chr14	45681896	45682396	chr14	45658143	45658144	0.572424
chr14	46757675	46758175	chr14	46822242	46822243	0.720724
chr14	46932084	46932584	chr14	46822242	46822243	0.830709
chr14	46757675	46758175	chr14	46832244	46832245	0.626293
chr14	46932084	46932584	chr14	46832244	46832245	0.684812
chr14	47073990	47074490	chr14	46832244	46832245	0.666498
chr14	47073990	47074490	chr14	47276857	47276858	0.774144
chr14	47143827	47144327	chr14	47276857	47276858	0.688886
chr14	47354239	47354739	chr14	47276857	47276858	0.628938
chr14	47354903	47355403	chr14	47276857	47276858	0.643725
chr14	47464124	47464624	chr14	47276857	47276858	0.665836
chr14	47354239	47354739	chr14	47373860	47373861	0.533569
chr14	47354903	47355403	chr14	47568434	47568435	0.592156
chr14	47464124	47464624	chr14	47568434	47568435	0.573744
chr14	50624765	50625265	chr14	50795728	50795729	0.805576
chr14	50795487	50795987	chr14	50795728	50795729	0.955734
chr14	50892579	50893079	chr14	50795728	50795729	0.577577
chr14	50978437	50978937	chr14	50795728	50795729	0.804814
chr14	50795487	50795987	chr14	50924893	50924894	0.510694
chr14	50795487	50795987	chr14	50924949	50924950	0.768361
chr14	50978437	50978937	chr14	50924949	50924950	0.665052
chr14	52047373	52047873	chr14	52197239	52197240	0.706074
chr14	52071422	52071922	chr14	52197239	52197240	0.503746
chr14	54595082	54595582	chr14	54554361	54554362	0.553592
chr14	54597004	54597504	chr14	54554361	54554362	0.539378
chr14	54631815	54632315	chr14	54554361	54554362	0.564056
chr14	54650485	54650985	chr14	54554361	54554362	0.569543
chr14	54698485	54698985	chr14	54554361	54554362	0.583926
chr14	54595082	54595582	chr14	54577661	54577662	0.544523
chr14	54492274	54492774	chr14	54617995	54617996	0.54046
chr14	54595082	54595582	chr14	54617995	54617996	0.771804
chr14	54597004	54597504	chr14	54617995	54617996	0.566631
chr14	54631815	54632315	chr14	54617995	54617996	0.536394
chr14	54650485	54650985	chr14	54617995	54617996	0.594713
chr14	54698485	54698985	chr14	54617995	54617996	0.528013
chr14	54813927	54814427	chr14	54617995	54617996	0.714579
chr14	54595082	54595582	chr14	54686931	54686932	0.700007
chr14	54631815	54632315	chr14	54864158	54864159	0.568999
chr14	54650485	54650985	chr14	54864158	54864159	0.629466
chr14	54698485	54698985	chr14	54864158	54864159	0.53436
chr14	54813927	54814427	chr14	54864158	54864159	0.699978
chr14	54949835	54950335	chr14	54864158	54864159	0.543408
chr14	54950364	54950864	chr14	54864158	54864159	0.631823
chr14	54956515	54957015	chr14	54864158	54864159	0.691287
chr14	55576364	55576864	chr14	55722257	55722258	0.509375
chr14	55711946	55712446	chr14	55722257	55722258	0.501001
chr14	55576364	55576864	chr14	55745693	55745694	0.531013
chr14	55711946	55712446	chr14	55745693	55745694	0.608142
chr14	55733868	55734368	chr14	55745693	55745694	0.5401
chr14	56364707	56365207	chr14	56402697	56402698	0.517829
chr14	56402411	56402911	chr14	56402697	56402698	0.887209
chr14	56402411	56402911	chr14	56571846	56571847	0.726226
chr14	56787572	56788072	chr14	56668248	56668249	0.525453
chr14	57036238	57036738	chr14	56811716	56811717	0.571457
chr14	57057579	57058079	chr14	56811716	56811717	0.535465
chr14	57700103	57700603	chr14	57798189	57798190	0.556997
chr14	57920519	57921019	chr14	57798189	57798190	0.508461
chr14	57920519	57921019	chr14	57999262	57999263	0.556173
chr14	59370401	59370901	chr14	59365490	59365491	0.854316
chr14	59370401	59370901	chr14	59440880	59440881	0.766335
chr14	59629812	59630312	chr14	59440880	59440881	0.640888
chr14	59370401	59370901	chr14	59440965	59440966	0.794833
chr14	59629812	59630312	chr14	59440965	59440966	0.58103
chr14	61525821	61526321	chr14	61439947	61439948	0.651775
chr14	61525821	61526321	chr14	61556886	61556887	0.592115
chr14	61798203	61798703	chr14	61556886	61556887	0.635942
chr14	62580903	62581403	chr14	62761112	62761113	0.646393
chr14	62587111	62587611	chr14	62761112	62761113	0.673904
chr14	63193085	63193585	chr14	63193525	63193526	0.566168
chr14	63193614	63194114	chr14	63193525	63193526	0.618783
chr14	63493462	63493962	chr14	63543953	63543954	0.518339
chr14	63819159	63819659	chr14	63606530	63606531	0.537709
chr14	66009011	66009511	chr14	65837302	65837303	0.56296
chr14	66950776	66951276	chr14	67072471	67072472	0.566551
chr14	67197059	67197559	chr14	67072471	67072472	0.595321
chr14	68139481	68139981	chr14	68083884	68083885	0.615724
chr14	68048101	68048601	chr14	68125004	68125005	0.654733
chr14	68139481	68139981	chr14	68125004	68125005	0.911004
chr14	70241413	70241913	chr14	70429094	70429095	0.557039
chr14	70428868	70429368	chr14	70429094	70429095	0.912071
chr14	70641970	70642470	chr14	70429094	70429095	0.584414
chr14	70428868	70429368	chr14	70443471	70443472	0.639895
chr14	75064488	75064988	chr14	75131123	75131124	0.533652
chr14	75396460	75396960	chr14	75284373	75284374	0.710486
chr14	75823067	75823567	chr14	76010865	76010866	0.545548
chr14	76425929	76426429	chr14	76556889	76556890	0.682531
chr14	76471233	76471733	chr14	76556889	76556890	0.631489
chr14	78775708	78776208	chr14	78536860	78536861	0.678707
chr14	99261983	99262483	chr14	99099770	99099771	0.697793
chr14	99261983	99262483	chr14	99099424	99099425	0.566416
chr14	101489740	101490240	chr14	101653967	101653968	0.513017
chr14	106105964	106106464	chr14	106106198	106106199	0.952175
chr14	106106883	106107383	chr14	106106198	106106199	0.855661
chr14	118511671	118512171	chr14	118706219	118706220	0.833176
chr14	121500032	121500532	chr14	121379230	121379231	0.594038
chr14	121731799	121732299	chr14	121878606	121878607	0.623046
chr14	122034395	122034895	chr14	121878606	121878607	0.720753
chr14	122034395	122034895	chr14	122034674	122034675	0.914273
chr14	122222615	122223115	chr14	122034674	122034675	0.622543
chr15	3303077	3303577	chr15	3303526	3303527	0.808364
chr15	6654143	6654643	chr15	6708381	6708382	0.542861
chr15	10558401	10558901	chr15	10485937	10485938	0.603291
chr15	12038195	12038695	chr15	11996007	11996008	0.661974
chr15	12106224	12106724	chr15	11996007	11996008	0.537352
chr15	12665899	12666399	chr15	12824815	12824816	0.668125
chr15	12833263	12833763	chr15	12824815	12824816	0.797107
chr15	13005617	13006117	chr15	12824815	12824816	0.742641
chr15	25779721	25780221	chr15	25984366	25984367	0.539066
chr15	25781024	25781524	chr15	25984366	25984367	0.685197
chr15	25835042	25835542	chr15	25984366	25984367	0.572812
chr15	25850577	25851077	chr15	25984366	25984367	0.680787
chr15	27754782	27755282	chr15	27630693	27630694	0.633529
chr15	31309499	31309999	chr15	31453689	31453690	0.585657
chr15	34453169	34453669	chr15	34495311	34495312	0.536144
chr15	36179099	36179599	chr15	36174010	36174011	0.505926
chr15	36126627	36127127	chr15	36179530	36179531	0.642901
chr15	36179099	36179599	chr15	36179530	36179531	0.763376
chr15	37232717	37233217	chr15	37233036	37233037	0.699733
chr15	37279400	37279900	chr15	37233036	37233037	0.837749
chr15	37347485	37347985	chr15	37233036	37233037	0.933791
chr15	38989936	38990436	chr15	39076932	39076933	0.554325
chr15	38890584	38891084	chr15	39112874	39112875	0.566052
chr15	38989936	38990436	chr15	39112874	39112875	0.671194
chr15	38989936	38990436	chr15	39198286	39198287	0.584928
chr15	40038265	40038765	chr15	40162607	40162608	0.885739
chr15	40114640	40115140	chr15	40162607	40162608	0.506075
chr15	43169006	43169506	chr15	43170826	43170827	0.540125
chr15	43170042	43170542	chr15	43170826	43170827	0.596448
chr15	57985953	57986453	chr15	58076508	58076509	0.587735
chr15	58853232	58853732	chr15	58933810	58933811	0.61167
chr15	74872859	74873359	chr15	74709322	74709323	0.615531
chr15	74487240	74487740	chr15	74721234	74721235	0.634132
chr15	74529044	74529544	chr15	74721234	74721235	0.541466
chr15	74799598	74800098	chr15	74721234	74721235	0.767727
chr15	74872859	74873359	chr15	74721234	74721235	0.884543
chr15	74897993	74898493	chr15	74721234	74721235	0.643437
chr15	74799598	74800098	chr15	74818815	74818816	0.802546
chr15	74872859	74873359	chr15	74818815	74818816	0.901425
chr15	74897993	74898493	chr15	74818815	74818816	0.670429
chr15	74799598	74800098	chr15	74819076	74819077	0.787185
chr15	74872859	74873359	chr15	74819076	74819077	0.884799
chr15	74897993	74898493	chr15	74819076	74819077	0.678683
chr15	75646270	75646770	chr15	75704288	75704289	0.843596
chr15	75708867	75709367	chr15	75704288	75704289	0.688266
chr15	75712094	75712594	chr15	75704288	75704289	0.542925
chr15	75885489	75885989	chr15	75704288	75704289	0.598124
chr15	76329030	76329530	chr15	76477269	76477270	0.608274
chr15	76356224	76356724	chr15	76477269	76477270	0.582279
chr15	76534410	76534910	chr15	76477269	76477270	0.508447
chr15	76612811	76613311	chr15	76477269	76477270	0.514118
chr15	76329030	76329530	chr15	76538746	76538747	0.565607
chr15	76356224	76356724	chr15	76538746	76538747	0.529898
chr15	76534410	76534910	chr15	76538746	76538747	0.509608
chr15	76612811	76613311	chr15	76607591	76607592	0.548471
chr15	76853519	76854019	chr15	76607591	76607592	0.640615
chr15	76534410	76534910	chr15	76639929	76639930	0.566289
chr15	76612811	76613311	chr15	76639929	76639930	0.513802
chr15	76853519	76854019	chr15	76639929	76639930	0.744499
chr15	76534410	76534910	chr15	76710559	76710560	0.504373
chr15	76853519	76854019	chr15	76710559	76710560	0.640662
chr15	76911000	76911500	chr15	76710559	76710560	0.672243
chr15	76911533	76912033	chr15	76710559	76710560	0.61645
chr15	76853519	76854019	chr15	76879276	76879277	0.73579
chr15	76911000	76911500	chr15	76879276	76879277	0.70055
chr15	76911533	76912033	chr15	76879276	76879277	0.652209
chr15	77058512	77059012	chr15	76879276	76879277	0.501378
chr15	78003854	78004354	chr15	77956722	77956723	0.737832
chr15	78003854	78004354	chr15	77970824	77970825	0.735987
chr15	78617692	78618192	chr15	78803042	78803043	0.524089
chr15	78761163	78761663	chr15	78803042	78803043	0.542865
chr15	78992872	78993372	chr15	78803042	78803043	0.628941
chr15	78617692	78618192	chr15	78855529	78855530	0.743371
chr15	78761163	78761663	chr15	78855529	78855530	0.764645
chr15	78863625	78864125	chr15	78855529	78855530	0.54709
chr15	78992872	78993372	chr15	78855529	78855530	0.885783
chr15	78761163	78761663	chr15	78913919	78913920	0.712342
chr15	78992872	78993372	chr15	78913919	78913920	0.800771
chr15	78761163	78761663	chr15	78934933	78934934	0.626718
chr15	78863625	78864125	chr15	78934933	78934934	0.51198
chr15	78992872	78993372	chr15	78934933	78934934	0.719563
chr15	78992872	78993372	chr15	79030874	79030875	0.776867
chr15	79212425	79212925	chr15	79030874	79030875	0.589568
chr15	79212996	79213496	chr15	79030874	79030875	0.782507
chr15	79258454	79258954	chr15	79030874	79030875	0.610235
chr15	78992872	78993372	chr15	79075223	79075224	0.593866
chr15	79212996	79213496	chr15	79075223	79075224	0.67679
chr15	79258454	79258954	chr15	79075223	79075224	0.546347
chr15	78992872	78993372	chr15	79141325	79141326	0.711433
chr15	79212425	79212925	chr15	79141325	79141326	0.597782
chr15	79212996	79213496	chr15	79141325	79141326	0.728819
chr15	79258454	79258954	chr15	79141325	79141326	0.601326
chr15	79212996	79213496	chr15	79229173	79229174	0.576212
chr15	79481033	79481533	chr15	79442057	79442058	0.52416
chr15	79481033	79481533	chr15	79690896	79690897	0.516621
chr15	79792438	79792938	chr15	79932646	79932647	0.797241
chr15	79906768	79907268	chr15	79932646	79932647	0.869639
chr15	79911247	79911747	chr15	79932646	79932647	0.897271
chr15	79964394	79964894	chr15	79932646	79932647	0.89497
chr15	80065164	80065664	chr15	79932646	79932647	0.585266
chr15	80115422	80115922	chr15	79932646	79932647	0.863918
chr15	79964394	79964894	chr15	80014808	80014809	0.511666
chr15	80211920	80212420	chr15	80264306	80264307	0.544599
chr15	80564907	80565407	chr15	80572597	80572598	0.551725
chr15	80947140	80947640	chr15	80948490	80948491	0.541066
chr15	81768976	81769476	chr15	81663889	81663890	0.504987
chr15	81768976	81769476	chr15	81871892	81871893	0.581772
chr15	81768976	81769476	chr15	81926213	81926214	0.619884
chr15	81768976	81769476	chr15	81980540	81980541	0.627545
chr15	82064768	82065268	chr15	81980540	81980541	0.600713
chr15	81768976	81769476	chr15	82015519	82015520	0.564225
chr15	83295071	83295571	chr15	83149336	83149337	0.562496
chr15	83295071	83295571	chr15	83367297	83367298	0.677041
chr15	83495851	83496351	chr15	83367297	83367298	0.683131
chr15	83512426	83512926	chr15	83367297	83367298	0.657784
chr15	83569588	83570088	chr15	83367297	83367298	0.639777
chr15	83295071	83295571	chr15	83526862	83526863	0.634204
chr15	83495851	83496351	chr15	83526862	83526863	0.635803
chr15	83512426	83512926	chr15	83526862	83526863	0.58619
chr15	83569588	83570088	chr15	83526862	83526863	0.640796
chr15	84065160	84065660	chr15	84105754	84105755	0.632393
chr15	84069983	84070483	chr15	84105754	84105755	0.505329
chr15	84073034	84073534	chr15	84105754	84105755	0.637901
chr15	84074750	84075250	chr15	84105754	84105755	0.552111
chr15	84131293	84131793	chr15	84105754	84105755	0.56414
chr15	84766542	84767042	chr15	84923428	84923429	0.562837
chr15	84772687	84773187	chr15	84923428	84923429	0.563254
chr15	84784786	84785286	chr15	84923428	84923429	0.596448
chr15	85131313	85131813	chr15	85131957	85131958	0.705465
chr15	85211042	85211542	chr15	85131957	85131958	0.786164
chr15	88982578	88983078	chr15	88751711	88751712	0.632279
chr15	88982578	88983078	chr15	88819646	88819647	0.645281
chr15	88890999	88891499	chr15	88982994	88982995	0.579577
chr15	88982578	88983078	chr15	88982994	88982995	0.973405
chr15	89059243	89059743	chr15	88982994	88982995	0.561195
chr15	89140881	89141381	chr15	88982994	88982995	0.607295
chr15	89147388	89147888	chr15	88982994	88982995	0.51057
chr15	89387077	89387577	chr15	89410503	89410504	0.572174
chr15	89410040	89410540	chr15	89410503	89410504	0.94096
chr15	89457345	89457845	chr15	89410503	89410504	0.730313
chr15	89556741	89557241	chr15	89410503	89410504	0.522771
chr15	89410040	89410540	chr15	89499857	89499858	0.808066
chr15	89457345	89457845	chr15	89499857	89499858	0.638804
chr15	89730230	89730730	chr15	89499857	89499858	0.503456
chr15	93272340	93272840	chr15	93398350	93398351	0.563417
chr15	93369161	93369661	chr15	93398350	93398351	0.583479
chr15	93503298	93503798	chr15	93398350	93398351	0.817026
chr15	93577786	93578286	chr15	93398350	93398351	0.621128
chr15	96235960	96236460	chr15	96460843	96460844	0.555695
chr15	96257705	96258205	chr15	96460843	96460844	0.529209
chr15	98989656	98990156	chr15	98881414	98881415	0.604195
chr15	100685131	100685631	chr15	100636940	100636941	0.570094
chr15	100720317	100720817	chr15	100636940	100636941	0.696194
chr15	100729255	100729755	chr15	100636940	100636941	0.509472
chr15	100685131	100685631	chr15	100729376	100729377	0.512388
chr15	100720317	100720817	chr15	100729376	100729377	0.698143
chr15	100896211	100896711	chr15	100729376	100729377	0.579673
chr15	100972702	100973202	chr15	100729376	100729377	0.658418
chr15	100685131	100685631	chr15	100869858	100869859	0.540079
chr15	100720317	100720817	chr15	100869858	100869859	0.646151
chr15	100896211	100896711	chr15	100869858	100869859	0.560814
chr15	100972702	100973202	chr15	100869858	100869859	0.547338
chr15	101015993	101016493	chr15	100869858	100869859	0.617165
chr15	102455918	102456418	chr15	102518192	102518193	0.518392
chr15	102743873	102744373	chr15	102518192	102518193	0.728687
chr15	103430180	103430680	chr15	103430427	103430428	0.968017
chr16	3689564	3690064	chr16	3872374	3872375	0.666741
chr16	3974430	3974930	chr16	3872374	3872375	0.710047
chr16	4849185	4849685	chr16	4624946	4624947	0.602254
chr16	4549238	4549738	chr16	4726361	4726362	0.559947
chr16	4849185	4849685	chr16	4726361	4726362	0.675024
chr16	4849185	4849685	chr16	5007288	5007289	0.816609
chr16	5007033	5007533	chr16	5007288	5007289	0.541881
chr16	5007821	5008321	chr16	5007288	5007289	0.61489
chr16	4849185	4849685	chr16	5049910	5049911	0.526999
chr16	8783156	8783656	chr16	8637701	8637702	0.626845
chr16	8792119	8792619	chr16	8637701	8637702	0.651215
chr16	10169980	10170480	chr16	10170228	10170229	0.948134
chr16	10193237	10193737	chr16	10170228	10170229	0.527146
chr16	10337780	10338280	chr16	10170228	10170229	0.79575
chr16	10357890	10358390	chr16	10170228	10170229	0.726898
chr16	10169980	10170480	chr16	10192906	10192907	0.824208
chr16	10337780	10338280	chr16	10192906	10192907	0.673382
chr16	10357890	10358390	chr16	10192906	10192907	0.581325
chr16	10169980	10170480	chr16	10411938	10411939	0.760857
chr16	10337780	10338280	chr16	10411938	10411939	0.665632
chr16	10357890	10358390	chr16	10411938	10411939	0.62864
chr16	16197344	16197844	chr16	16213345	16213346	0.578138
chr16	16546987	16547487	chr16	16302965	16302966	0.636069
chr16	17051462	17051962	chr16	17070139	17070140	0.543904
chr16	17121112	17121612	chr16	17070139	17070140	0.843139
chr16	17144240	17144740	chr16	17070139	17070140	0.708791
chr16	17121112	17121612	chr16	17111252	17111253	0.556042
chr16	17051462	17051962	chr16	17125106	17125107	0.60706
chr16	17121112	17121612	chr16	17125106	17125107	0.909047
chr16	17144240	17144740	chr16	17125106	17125107	0.755125
chr16	17147499	17147999	chr16	17125106	17125107	0.529465
chr16	17121112	17121612	chr16	17201492	17201493	0.730014
chr16	17144240	17144740	chr16	17201492	17201493	0.566355
chr16	17276814	17277314	chr16	17201492	17201493	0.528335
chr16	17051462	17051962	chr16	17233587	17233588	0.519487
chr16	17121112	17121612	chr16	17233587	17233588	0.787386
chr16	17144240	17144740	chr16	17233587	17233588	0.647255
chr16	17489812	17490312	chr16	17489611	17489612	0.568108
chr16	18775745	18776245	chr16	18776847	18776848	0.785655
chr16	20530706	20531206	chr16	20498817	20498818	0.517871
chr16	20601754	20602254	chr16	20498817	20498818	0.565468
chr16	20530706	20531206	chr16	20611601	20611602	0.567135
chr16	20601754	20602254	chr16	20611601	20611602	0.503136
chr16	20765310	20765810	chr16	20611601	20611602	0.583434
chr16	20530706	20531206	chr16	20651652	20651653	0.629942
chr16	20601754	20602254	chr16	20651652	20651653	0.532355
chr16	20765310	20765810	chr16	20651652	20651653	0.52773
chr16	20530706	20531206	chr16	20717826	20717827	0.568713
chr16	20601754	20602254	chr16	20717826	20717827	0.503887
chr16	20765310	20765810	chr16	20717826	20717827	0.51906
chr16	22571889	22572389	chr16	22811410	22811411	0.737374
chr16	22572565	22573065	chr16	22811410	22811411	0.77043
chr16	22687841	22688341	chr16	22811410	22811411	0.762486
chr16	30515137	30515637	chr16	30587589	30587590	0.66001
chr16	30656838	30657338	chr16	30587589	30587590	0.577214
chr16	30673112	30673612	chr16	30587589	30587590	0.572228
chr16	30972132	30972632	chr16	31201238	31201239	0.590828
chr16	31630357	31630857	chr16	31663443	31663444	0.533771
chr16	31970412	31970912	chr16	32099727	32099728	0.527244
chr16	32273273	32273773	chr16	32099727	32099728	0.669046
chr16	32323964	32324464	chr16	32099727	32099728	0.669403
chr16	32323964	32324464	chr16	32247025	32247026	0.547118
chr16	32273273	32273773	chr16	32247227	32247228	0.561794
chr16	32323964	32324464	chr16	32247227	32247228	0.506657
chr16	32273273	32273773	chr16	32419702	32419703	0.621147
chr16	32323964	32324464	chr16	32419702	32419703	0.660323
chr16	32641751	32642251	chr16	32419702	32419703	0.526798
chr16	32641751	32642251	chr16	32877784	32877785	0.607068
chr16	32731654	32732154	chr16	32877784	32877785	0.591848
chr16	32784830	32785330	chr16	32877784	32877785	0.671702
chr16	35645445	35645945	chr16	35770386	35770387	0.821055
chr16	35771140	35771640	chr16	35770386	35770387	0.713277
chr16	36634904	36635404	chr16	36875003	36875004	0.72293
chr16	36693874	36694374	chr16	36875003	36875004	0.579206
chr16	36722199	36722699	chr16	36875003	36875004	0.680104
chr16	36634904	36635404	chr16	36828400	36828401	0.509828
chr16	36693874	36694374	chr16	36828400	36828401	0.545509
chr16	36722199	36722699	chr16	36828400	36828401	0.529523
chr16	37639900	37640400	chr16	37539894	37539895	0.609611
chr16	38324273	38324773	chr16	38550256	38550257	0.632158
chr16	44299634	44300134	chr16	44347401	44347402	0.6482
chr16	44404185	44404685	chr16	44347401	44347402	0.680837
chr16	44501390	44501890	chr16	44347401	44347402	0.626733
chr16	48431003	48431503	chr16	48283735	48283736	0.838705
chr16	48431003	48431503	chr16	48431237	48431238	0.839777
chr16	56986403	56986903	chr16	57121714	57121715	0.53278
chr16	57076012	57076512	chr16	57121714	57121715	0.545944
chr16	56986403	56986903	chr16	57167332	57167333	0.502768
chr16	57076012	57076512	chr16	57167332	57167333	0.56118
chr16	57303715	57304215	chr16	57167332	57167333	0.54428
chr16	59401950	59402450	chr16	59471775	59471776	0.700171
chr16	59457772	59458272	chr16	59471775	59471776	0.800996
chr16	85079977	85080477	chr16	84834925	84834926	0.522085
chr16	87665704	87666204	chr16	87495869	87495870	0.507264
chr16	87670689	87671189	chr16	87495869	87495870	0.512355
chr16	87720951	87721451	chr16	87495869	87495870	0.823532
chr16	90150148	90150648	chr16	90143814	90143815	0.522649
chr16	90483626	90484126	chr16	90727371	90727372	0.511119
chr16	90496855	90497355	chr16	90727371	90727372	0.583161
chr16	90701412	90701912	chr16	90810413	90810414	0.612971
chr16	90849182	90849682	chr16	90810413	90810414	0.60756
chr16	90909535	90910035	chr16	90810413	90810414	0.587525
chr16	91269387	91269887	chr16	91044379	91044380	0.599388
chr16	92475045	92475545	chr16	92466169	92466170	0.523817
chr16	92324768	92325268	chr16	92498147	92498148	0.602741
chr16	92358704	92359204	chr16	92498147	92498148	0.559189
chr16	92374325	92374825	chr16	92498147	92498148	0.639853
chr16	92458258	92458758	chr16	92498147	92498148	0.799736
chr16	92475045	92475545	chr16	92498147	92498148	0.591509
chr16	92498442	92498942	chr16	92498147	92498148	0.567869
chr16	92499184	92499684	chr16	92498147	92498148	0.518602
chr16	92514834	92515334	chr16	92498147	92498148	0.73575
chr16	92542091	92542591	chr16	92498147	92498148	0.721164
chr16	92545609	92546109	chr16	92498147	92498148	0.807826
chr16	92571165	92571665	chr16	92498147	92498148	0.915183
chr16	92644022	92644522	chr16	92498147	92498148	0.647449
chr16	92644566	92645066	chr16	92498147	92498148	0.671356
chr16	93911239	93911739	chr16	93683219	93683220	0.63826
chr16	93911239	93911739	chr16	93832121	93832122	0.633549
chr16	93974722	93975222	chr16	93832121	93832122	0.657524
chr16	94010532	94011032	chr16	93832121	93832122	0.593211
chr16	94064085	94064585	chr16	93832121	93832122	0.659682
chr16	95543440	95543940	chr16	95586593	95586594	0.680429
chr16	95600797	95601297	chr16	95586593	95586594	0.689063
chr16	95658761	95659261	chr16	95586593	95586594	0.610939
chr16	96135712	96136212	chr16	95990903	95990904	0.666184
chr16	96235538	96236038	chr16	95990903	95990904	0.731878
chr16	96135712	96136212	chr16	96082428	96082429	0.630666
chr16	96235538	96236038	chr16	96082428	96082429	0.659302
chr16	97272202	97272702	chr16	97504936	97504937	0.562433
chr16	97512304	97512804	chr16	97504936	97504937	0.924114
chr17	3075000	3075500	chr17	3114972	3114973	0.737482
chr17	3157316	3157816	chr17	3114972	3114973	0.62823
chr17	3414434	3414934	chr17	3557713	3557714	0.676067
chr17	5853852	5854352	chr17	5841380	5841381	0.690575
chr17	8260682	8261182	chr17	8165518	8165519	0.77647
chr17	8388984	8389484	chr17	8165518	8165519	0.574361
chr17	12080865	12081365	chr17	12318660	12318661	0.661341
chr17	12750377	12750877	chr17	12910000	12910001	0.558813
chr17	12846300	12846800	chr17	12910000	12910001	0.517329
chr17	12909705	12910205	chr17	12910000	12910001	0.813814
chr17	12931757	12932257	chr17	12910000	12910001	0.503479
chr17	12909705	12910205	chr17	12916329	12916330	0.676544
chr17	15240576	15241076	chr17	15010184	15010185	0.762994
chr17	15247793	15248293	chr17	15010184	15010185	0.511347
chr17	14918354	14918854	chr17	15041559	15041560	0.62052
chr17	15240576	15241076	chr17	15041559	15041560	0.884362
chr17	15247793	15248293	chr17	15041559	15041560	0.675176
chr17	17303457	17303957	chr17	17374332	17374333	0.604341
chr17	23720737	23721237	chr17	23673864	23673865	0.574874
chr17	23843937	23844437	chr17	23673864	23673865	0.503938
chr17	24031702	24032202	chr17	23829109	23829110	0.512151
chr17	24015459	24015959	chr17	24073485	24073486	0.559731
chr17	24031702	24032202	chr17	24251409	24251410	0.591841
chr17	24504906	24505406	chr17	24414675	24414676	0.54294
chr17	24544612	24545112	chr17	24414675	24414676	0.545384
chr17	24758001	24758501	chr17	24632682	24632683	0.609712
chr17	24758001	24758501	chr17	24707653	24707654	0.658688
chr17	24504906	24505406	chr17	24719965	24719966	0.569942
chr17	24544612	24545112	chr17	24719965	24719966	0.523642
chr17	24758001	24758501	chr17	24719965	24719966	0.750633
chr17	24686363	24686863	chr17	24850302	24850303	0.519606
chr17	24727983	24728483	chr17	24886674	24886675	0.502588
chr17	24758001	24758501	chr17	24886674	24886675	0.6992
chr17	24686363	24686863	chr17	24886350	24886351	0.525827
chr17	24758001	24758501	chr17	24886350	24886351	0.500124
chr17	25221701	25222201	chr17	25016086	25016087	0.505491
chr17	25222564	25223064	chr17	25016086	25016087	0.527997
chr17	25221701	25222201	chr17	25184561	25184562	0.60086
chr17	25222564	25223064	chr17	25184561	25184562	0.59508
chr17	25282091	25282591	chr17	25184561	25184562	0.502716
chr17	25221701	25222201	chr17	25240170	25240171	0.549449
chr17	25222564	25223064	chr17	25240170	25240171	0.611791
chr17	25222564	25223064	chr17	25274310	25274311	0.534191
chr17	25819354	25819854	chr17	25717172	25717173	0.588936
chr17	25819354	25819854	chr17	25727415	25727416	0.604789
chr17	25819354	25819854	chr17	25727751	25727752	0.581304
chr17	26431885	26432385	chr17	26252910	26252911	0.582465
chr17	27177962	27178462	chr17	27057304	27057305	0.670878
chr17	27177962	27178462	chr17	27133891	27133892	0.555284
chr17	27333515	27334015	chr17	27133891	27133892	0.654012
chr17	27333515	27334015	chr17	27556574	27556575	0.750709
chr17	27554941	27555441	chr17	27556574	27556575	0.537072
chr17	27639015	27639515	chr17	27556574	27556575	0.809427
chr17	27650128	27650628	chr17	27556574	27556575	0.539589
chr17	27717072	27717572	chr17	27556574	27556575	0.507317
chr17	27333515	27334015	chr17	27565727	27565728	0.55669
chr17	27554941	27555441	chr17	27565727	27565728	0.594174
chr17	27639015	27639515	chr17	27565727	27565728	0.600345
chr17	27650128	27650628	chr17	27565727	27565728	0.516159
chr17	27639015	27639515	chr17	27655591	27655592	0.694877
chr17	28075919	28076419	chr17	27908243	27908244	0.563567
chr17	28075919	28076419	chr17	28142526	28142527	0.648224
chr17	28533263	28533763	chr17	28622454	28622455	0.66653
chr17	28551516	28552016	chr17	28622454	28622455	0.580833
chr17	28858167	28858667	chr17	28622454	28622455	0.575767
chr17	28814489	28814989	chr17	28942262	28942263	0.504756
chr17	28858167	28858667	chr17	28942262	28942263	0.851037
chr17	28895479	28895979	chr17	28942262	28942263	0.93501
chr17	28899503	28900003	chr17	28942262	28942263	0.833797
chr17	28931895	28932395	chr17	28942262	28942263	0.51588
chr17	28941967	28942467	chr17	28942262	28942263	0.779344
chr17	29065508	29066008	chr17	28942262	28942263	0.770712
chr17	29188928	29189428	chr17	28942262	28942263	0.764174
chr17	29065508	29066008	chr17	29263971	29263972	0.64834
chr17	29188928	29189428	chr17	29263971	29263972	0.626203
chr17	29321987	29322487	chr17	29263971	29263972	0.586891
chr17	29322489	29322989	chr17	29263971	29263972	0.667943
chr17	29368667	29369167	chr17	29263971	29263972	0.676696
chr17	29418334	29418834	chr17	29263971	29263972	0.623409
chr17	30602233	30602733	chr17	30626905	30626906	0.540514
chr17	30874229	30874729	chr17	30626905	30626906	0.605717
chr17	31878060	31878560	chr17	32034508	32034509	0.624935
chr17	32033962	32034462	chr17	32034508	32034509	0.825551
chr17	31878060	31878560	chr17	32036162	32036163	0.5143
chr17	32033962	32034462	chr17	32036162	32036163	0.538292
chr17	32415613	32416113	chr17	32321238	32321239	0.541643
chr17	32415613	32416113	chr17	32350577	32350578	0.531087
chr17	34094307	34094807	chr17	33905135	33905136	0.525999
chr17	34571821	34572321	chr17	34398820	34398821	0.500621
chr17	34914216	34914716	chr17	34850391	34850392	0.601005
chr17	35073988	35074488	chr17	34850391	34850392	0.510345
chr17	34914216	34914716	chr17	34898492	34898493	0.597186
chr17	35073988	35074488	chr17	34898492	34898493	0.519319
chr17	34914216	34914716	chr17	34981854	34981855	0.574294
chr17	34813687	34814187	chr17	35000907	35000908	0.559257
chr17	34873327	34873827	chr17	35000907	35000908	0.522698
chr17	34914216	34914716	chr17	35000907	35000908	0.758071
chr17	35073988	35074488	chr17	35000907	35000908	0.589008
chr17	35204993	35205493	chr17	35000907	35000908	0.533724
chr17	34914216	34914716	chr17	35121496	35121497	0.612674
chr17	35073988	35074488	chr17	35121496	35121497	0.522537
chr17	35276377	35276877	chr17	35121496	35121497	0.684763
chr17	35359444	35359944	chr17	35121496	35121497	0.552446
chr17	35204993	35205493	chr17	35342333	35342334	0.573437
chr17	35276377	35276877	chr17	35342333	35342334	0.788134
chr17	35295756	35296256	chr17	35342333	35342334	0.599055
chr17	35321264	35321764	chr17	35342333	35342334	0.507663
chr17	35359444	35359944	chr17	35342333	35342334	0.555167
chr17	35505966	35506466	chr17	35342333	35342334	0.75136
chr17	35520915	35521415	chr17	35342333	35342334	0.918279
chr17	35567739	35568239	chr17	35342333	35342334	0.533525
chr17	35575267	35575767	chr17	35342333	35342334	0.538133
chr17	35276377	35276877	chr17	35506032	35506033	0.783317
chr17	35295756	35296256	chr17	35506032	35506033	0.606069
chr17	35321264	35321764	chr17	35506032	35506033	0.523898
chr17	35359444	35359944	chr17	35506032	35506033	0.57355
chr17	35505966	35506466	chr17	35506032	35506033	0.755068
chr17	35520915	35521415	chr17	35506032	35506033	0.922766
chr17	35567739	35568239	chr17	35506032	35506033	0.5501
chr17	35575267	35575767	chr17	35506032	35506033	0.528166
chr17	35617061	35617561	chr17	35506032	35506033	0.74778
chr17	35520915	35521415	chr17	35667592	35667593	0.552843
chr17	35520915	35521415	chr17	35673743	35673744	0.556489
chr17	35736413	35736913	chr17	35916369	35916370	0.518708
chr17	36083032	36083532	chr17	35916369	35916370	0.519459
chr17	36215914	36216414	chr17	35969750	35969751	0.574661
chr17	36215914	36216414	chr17	35979955	35979956	0.514217
chr17	45239558	45240058	chr17	45433707	45433708	0.534461
chr17	46674805	46675305	chr17	46646221	46646222	0.621534
chr17	46674805	46675305	chr17	46674255	46674256	0.636287
chr17	46674805	46675305	chr17	46680930	46680931	0.585934
chr17	46674805	46675305	chr17	46680453	46680454	0.699869
chr17	46729001	46729501	chr17	46680453	46680454	0.543888
chr17	46729587	46730087	chr17	46680453	46680454	0.508915
chr17	46674805	46675305	chr17	46890621	46890622	0.64497
chr17	47042819	47043319	chr17	46890621	46890622	0.655167
chr17	47056493	47056993	chr17	46890621	46890622	0.650763
chr17	47115200	47115700	chr17	46890621	46890622	0.589638
chr17	47115704	47116204	chr17	46890621	46890622	0.655107
chr17	47115200	47115700	chr17	47010532	47010533	0.505092
chr17	47115704	47116204	chr17	47010532	47010533	0.505517
chr17	47194499	47194999	chr17	47437375	47437376	0.726749
chr17	47210784	47211284	chr17	47437375	47437376	0.680729
chr17	47262949	47263449	chr17	47437375	47437376	0.668113
chr17	47436264	47436764	chr17	47437375	47437376	0.549933
chr17	47672959	47673459	chr17	47437375	47437376	0.582402
chr17	47703522	47704022	chr17	47611596	47611597	0.554364
chr17	47744059	47744559	chr17	47611596	47611597	0.56441
chr17	47672959	47673459	chr17	47688386	47688387	0.516679
chr17	47702790	47703290	chr17	47688386	47688387	0.582517
chr17	47703522	47704022	chr17	47688386	47688387	0.623266
chr17	47744059	47744559	chr17	47688386	47688387	0.672473
chr17	47904144	47904644	chr17	47688386	47688387	0.567977
chr17	48422914	48423414	chr17	48410000	48410001	0.537477
chr17	48432971	48433471	chr17	48410000	48410001	0.644207
chr17	48462146	48462646	chr17	48410000	48410001	0.563269
chr17	48545450	48545950	chr17	48410000	48410001	0.798253
chr17	48611206	48611706	chr17	48410000	48410001	0.631328
chr17	50209765	50210265	chr17	50190497	50190498	0.572506
chr17	50243859	50244359	chr17	50190497	50190498	0.50814
chr17	50293417	50293917	chr17	50190497	50190498	0.669833
chr17	50331698	50332198	chr17	50190497	50190498	0.601108
chr17	50394754	50395254	chr17	50190497	50190498	0.652347
chr17	50209765	50210265	chr17	50293620	50293621	0.854326
chr17	50243859	50244359	chr17	50293620	50293621	0.693997
chr17	50293417	50293917	chr17	50293620	50293621	0.954592
chr17	50394754	50395254	chr17	50293620	50293621	0.932744
chr17	55482497	55482997	chr17	55712628	55712629	0.743953
chr17	55956090	55956590	chr17	55712628	55712629	0.729001
chr17	55956090	55956590	chr17	55986511	55986512	0.817691
chr17	55999781	56000281	chr17	55986511	55986512	0.567565
chr17	56000379	56000879	chr17	55986511	55986512	0.601255
chr17	56069014	56069514	chr17	55986511	55986512	0.77803
chr17	56117380	56117880	chr17	55986511	55986512	0.520093
chr17	55956090	55956590	chr17	56040416	56040417	0.602658
chr17	56069014	56069514	chr17	56040416	56040417	0.515243
chr17	56081132	56081632	chr17	56074989	56074990	0.508054
chr17	56233760	56234260	chr17	56074989	56074990	0.530008
chr17	56504963	56505463	chr17	56584982	56584983	0.637588
chr17	56540553	56541053	chr17	56584982	56584983	0.714441
chr17	56612001	56612501	chr17	56584982	56584983	0.712617
chr17	56740746	56741246	chr17	56584982	56584983	0.547592
chr17	56817987	56818487	chr17	56584982	56584983	0.686286
chr17	56540553	56541053	chr17	56717762	56717763	0.509099
chr17	56612001	56612501	chr17	56717762	56717763	0.643289
chr17	56740746	56741246	chr17	56717762	56717763	0.531551
chr17	56817987	56818487	chr17	57011288	57011289	0.63016
chr17	57047333	57047833	chr17	57011288	57011289	0.670272
chr17	56973615	56974115	chr17	57149777	57149778	0.522944
chr17	57038131	57038631	chr17	57149777	57149778	0.564364
chr17	57038940	57039440	chr17	57149777	57149778	0.536845
chr17	57047333	57047833	chr17	57149777	57149778	0.834318
chr17	57070616	57071116	chr17	57149777	57149778	0.528794
chr17	57180306	57180806	chr17	57149777	57149778	0.503301
chr17	57190553	57191053	chr17	57149777	57149778	0.570592
chr17	57302117	57302617	chr17	57149777	57149778	0.939744
chr17	57305532	57306032	chr17	57149777	57149778	0.672941
chr17	57332220	57332720	chr17	57149777	57149778	0.569613
chr17	66008355	66008855	chr17	65885755	65885756	0.527942
chr17	66008355	66008855	chr17	66077046	66077047	0.55978
chr17	69196610	69197110	chr17	69416447	69416448	0.70147
chr17	69225958	69226458	chr17	69416447	69416448	0.719686
chr17	69282879	69283379	chr17	69416447	69416448	0.616557
chr17	71256168	71256668	chr17	71475343	71475344	0.55468
chr17	71274517	71275017	chr17	71475343	71475344	0.600207
chr17	71751140	71751640	chr17	71615895	71615896	0.685788
chr17	74272622	74273122	chr17	74323944	74323945	0.507689
chr17	75456089	75456589	chr17	75551946	75551947	0.610306
chr17	78591683	78592183	chr17	78835516	78835517	0.569864
chr17	78751112	78751612	chr17	78835516	78835517	0.518657
chr17	78872726	78873226	chr17	78835516	78835517	0.56819
chr17	78751112	78751612	chr17	78937070	78937071	0.514227
chr17	78872726	78873226	chr17	78937070	78937071	0.593774
chr17	79133726	79134226	chr17	78937070	78937071	0.505906
chr17	80349238	80349738	chr17	80207305	80207306	0.507776
chr17	80063880	80064380	chr17	80307407	80307408	0.699577
chr17	80349238	80349738	chr17	80307407	80307408	0.67671
chr17	85932733	85933233	chr17	86145175	86145176	0.813322
chr17	86258031	86258531	chr17	86145175	86145176	0.528602
chr17	87134621	87135121	chr17	87025561	87025562	0.5313
chr17	87635628	87636128	chr17	87635979	87635980	0.500942
chr17	87949630	87950130	chr17	87975050	87975051	0.578459
chr18	9619226	9619726	chr18	9619469	9619470	0.888183
chr18	10849161	10849661	chr18	10610352	10610353	0.702146
chr18	14526119	14526619	chr18	14706151	14706152	0.713879
chr18	14705987	14706487	chr18	14706151	14706152	0.779063
chr18	14705987	14706487	chr18	14783245	14783246	0.770965
chr18	25374654	25375154	chr18	25168877	25168878	0.594265
chr18	31928235	31928735	chr18	32067734	32067735	0.534652
chr18	32132990	32133490	chr18	32067734	32067735	0.572953
chr18	32133526	32134026	chr18	32067734	32067735	0.618731
chr18	33041411	33041911	chr18	32837225	32837226	0.74979
chr18	33041411	33041911	chr18	32939041	32939042	0.615462
chr18	34768544	34769044	chr18	34932003	34932004	0.537207
chr18	36349145	36349645	chr18	36454495	36454496	0.552333
chr18	36766017	36766517	chr18	36760239	36760240	0.675305
chr18	36952773	36953273	chr18	36760239	36760240	0.558129
chr18	36975837	36976337	chr18	36760239	36760240	0.736783
chr18	36999550	37000050	chr18	36760239	36760240	0.545169
chr18	36663819	36664319	chr18	36766214	36766215	0.512915
chr18	36766017	36766517	chr18	36766214	36766215	0.764975
chr18	36952773	36953273	chr18	36766214	36766215	0.607603
chr18	36975837	36976337	chr18	36766214	36766215	0.771708
chr18	36999550	37000050	chr18	36766214	36766215	0.645838
chr18	37010686	37011186	chr18	36766214	36766215	0.680751
chr18	37515424	37515924	chr18	37644204	37644205	0.750466
chr18	37668951	37669451	chr18	37644204	37644205	0.5028
chr18	37691357	37691857	chr18	37644204	37644205	0.590895
chr18	37732566	37733066	chr18	37644204	37644205	0.540388
chr18	37749154	37749654	chr18	37644204	37644205	0.663284
chr18	37753378	37753878	chr18	37644204	37644205	0.601632
chr18	37757767	37758267	chr18	37644204	37644205	0.614703
chr18	37763279	37763779	chr18	37644204	37644205	0.586583
chr18	37768032	37768532	chr18	37644204	37644205	0.740824
chr18	37768032	37768532	chr18	37969731	37969732	0.528524
chr18	37822411	37822911	chr18	37969731	37969732	0.541126
chr18	38145522	38146022	chr18	38209762	38209763	0.521518
chr18	46355778	46356278	chr18	46597704	46597705	0.525798
chr18	46921552	46922052	chr18	46921815	46921816	0.730457
chr18	52331587	52332087	chr18	52465693	52465694	0.719419
chr18	52638573	52639073	chr18	52465693	52465694	0.710063
chr18	56498657	56499157	chr18	56562569	56562570	0.603781
chr18	56569050	56569550	chr18	56562569	56562570	0.502866
chr18	57768981	57769481	chr18	57878678	57878679	0.733207
chr18	61626338	61626838	chr18	61726331	61726332	0.669071
chr18	61697260	61697760	chr18	61726331	61726332	0.722198
chr18	61701898	61702398	chr18	61726331	61726332	0.743318
chr18	61967584	61968084	chr18	61726331	61726332	0.535242
chr18	61626338	61626838	chr18	61726390	61726391	0.795515
chr18	61697260	61697760	chr18	61726390	61726391	0.801382
chr18	61697781	61698281	chr18	61726390	61726391	0.589861
chr18	61701898	61702398	chr18	61726390	61726391	0.847834
chr18	61738817	61739317	chr18	61726390	61726391	0.615203
chr18	61967584	61968084	chr18	61726390	61726391	0.531646
chr18	62778473	62778973	chr18	62977916	62977917	0.617865
chr18	63491621	63492121	chr18	63692359	63692360	0.634949
chr18	67291325	67291825	chr18	67464849	67464850	0.54909
chr18	67472710	67473210	chr18	67464849	67464850	0.548649
chr18	67472710	67473210	chr18	67641599	67641600	0.759663
chr18	67740312	67740812	chr18	67641599	67641600	0.738102
chr18	67740860	67741360	chr18	67641599	67641600	0.531874
chr18	73608789	73609289	chr18	73815392	73815393	0.533897
chr18	76074924	76075424	chr18	76241701	76241702	0.50941
chr18	77197751	77198251	chr18	77065208	77065209	0.564323
chr18	77254337	77254837	chr18	77065208	77065209	0.716562
chr18	77505495	77505995	chr18	77714486	77714487	0.584267
chr18	77869950	77870450	chr18	77714486	77714487	0.607839
chr18	77869950	77870450	chr18	77767780	77767781	0.504537
chr18	80337845	80338345	chr18	80200619	80200620	0.560272
chr18	80104913	80105413	chr18	80206798	80206799	0.610917
chr18	80337845	80338345	chr18	80206798	80206799	0.701797
chr18	82521713	82522213	chr18	82692734	82692735	0.567291
chr18	82564543	82565043	chr18	82692734	82692735	0.609394
chr18	82838906	82839406	chr18	82692734	82692735	0.579944
chr18	82881042	82881542	chr18	82692734	82692735	0.613946
chr18	84670558	84671058	chr18	84589504	84589505	0.755484
chr18	84838411	84838911	chr18	84589504	84589505	0.8296
chr18	84838411	84838911	chr18	84935025	84935026	0.888971
chr18	88869971	88870471	chr18	88971790	88971791	0.568902
chr19	3942907	3943407	chr19	3912774	3912775	0.547206
chr19	3903315	3903815	chr19	4012755	4012756	0.554397
chr19	3942280	3942780	chr19	4012755	4012756	0.517487
chr19	3942907	3943407	chr19	4012755	4012756	0.531573
chr19	3903864	3904364	chr19	4042221	4042222	0.508897
chr19	3942280	3942780	chr19	4042221	4042222	0.65434
chr19	3942907	3943407	chr19	4042221	4042222	0.610234
chr19	4042074	4042574	chr19	4042221	4042222	0.61309
chr19	3942907	3943407	chr19	4097351	4097352	0.509122
chr19	3942280	3942780	chr19	4192174	4192175	0.522729
chr19	3942907	3943407	chr19	4192174	4192175	0.633103
chr19	4720812	4721312	chr19	4698668	4698669	0.818915
chr19	4787528	4788028	chr19	4698668	4698669	0.555999
chr19	4932205	4932705	chr19	4698668	4698669	0.675914
chr19	4720812	4721312	chr19	4928287	4928288	0.588225
chr19	5052808	5053308	chr19	5295455	5295456	0.507957
chr19	5306872	5307372	chr19	5366813	5366814	0.541521
chr19	5696007	5696507	chr19	5663707	5663708	0.536584
chr19	5696007	5696507	chr19	5731732	5731733	0.652069
chr19	5696007	5696507	chr19	5875208	5875209	0.646999
chr19	6070803	6071303	chr19	5875208	5875209	0.649379
chr19	5696007	5696507	chr19	5912871	5912872	0.552473
chr19	6070803	6071303	chr19	5964206	5964207	0.522339
chr19	6184363	6184863	chr19	5964206	5964207	0.546566
chr19	6070803	6071303	chr19	6057751	6057752	0.747691
chr19	6184363	6184863	chr19	6057751	6057752	0.769731
chr19	6070803	6071303	chr19	6077187	6077188	0.724942
chr19	6106016	6106516	chr19	6077187	6077188	0.512669
chr19	6184363	6184863	chr19	6077187	6077188	0.721255
chr19	6070803	6071303	chr19	6276896	6276897	0.666405
chr19	6184363	6184863	chr19	6276896	6276897	0.695205
chr19	6428748	6429248	chr19	6276896	6276897	0.509661
chr19	6515369	6515869	chr19	6276896	6276897	0.593078
chr19	6070803	6071303	chr19	6306457	6306458	0.585584
chr19	6184363	6184863	chr19	6306457	6306458	0.575892
chr19	6184363	6184863	chr19	6341160	6341161	0.674714
chr19	6389732	6390232	chr19	6341160	6341161	0.54726
chr19	6515369	6515869	chr19	6341160	6341161	0.59304
chr19	10345650	10346150	chr19	10457447	10457448	0.595291
chr19	11877772	11878272	chr19	11770415	11770416	0.574814
chr19	11877772	11878272	chr19	11819403	11819404	0.837175
chr19	15882687	15883187	chr19	15925059	15925060	0.529418
chr19	18749671	18750171	chr19	18713236	18713237	0.573067
chr19	25302003	25302503	chr19	25505706	25505707	0.605521
chr19	25505298	25505798	chr19	25505706	25505707	0.733988
chr19	25665416	25665916	chr19	25505706	25505707	0.53933
chr19	25505298	25505798	chr19	25610537	25610538	0.603148
chr19	28677904	28678404	chr19	28680077	28680078	0.807072
chr19	29505543	29506043	chr19	29367438	29367439	0.728547
chr19	30003526	30004026	chr19	30232957	30232958	0.879941
chr19	30167136	30167636	chr19	30232957	30232958	0.779937
chr19	30247317	30247817	chr19	30232957	30232958	0.564766
chr19	30472051	30472551	chr19	30232957	30232958	0.725038
chr19	33178555	33179055	chr19	33392295	33392296	0.630428
chr19	36180364	36180864	chr19	36348454	36348455	0.672131
chr19	37252045	37252545	chr19	37207545	37207546	0.59203
chr19	37362481	37362981	chr19	37207545	37207546	0.562291
chr19	37252045	37252545	chr19	37434841	37434842	0.67009
chr19	37362481	37362981	chr19	37434841	37434842	0.595242
chr19	37436493	37436993	chr19	37434841	37434842	0.702157
chr19	38119975	38120475	chr19	38224132	38224133	0.696146
chr19	38237970	38238470	chr19	38224132	38224133	0.57194
chr19	38442025	38442525	chr19	38224132	38224133	0.663182
chr19	40748567	40749067	chr19	40894703	40894704	0.687258
chr19	40872693	40873193	chr19	40894703	40894704	0.539535
chr19	40893936	40894436	chr19	40894703	40894704	0.677137
chr19	41053472	41053972	chr19	40894703	40894704	0.583763
chr19	40962860	40963360	chr19	40994535	40994536	0.680662
chr19	42039923	42040423	chr19	41896153	41896154	0.551387
chr19	42059845	42060345	chr19	41896153	41896154	0.712684
chr19	42059845	42060345	chr19	41933314	41933315	0.61589
chr19	42291784	42292284	chr19	42090435	42090436	0.517382
chr19	42439323	42439823	chr19	42518805	42518806	0.544118
chr19	42604030	42604530	chr19	42779976	42779977	0.512586
chr19	42812762	42813262	chr19	42779976	42779977	0.740133
chr19	43847845	43848345	chr19	44069785	44069786	0.752241
chr19	43874592	43875092	chr19	44069785	44069786	0.744624
chr19	43886755	43887255	chr19	44069785	44069786	0.512014
chr19	44237405	44237905	chr19	44192442	44192443	0.581744
chr19	44487226	44487726	chr19	44555415	44555416	0.582262
chr19	45796791	45797291	chr19	46045211	46045212	0.589273
chr19	46367965	46368465	chr19	46348988	46348989	0.523841
chr19	47049157	47049657	chr19	47015189	47015190	0.530144
chr19	47049157	47049657	chr19	47014698	47014699	0.76711
chr19	47239979	47240479	chr19	47014698	47014699	0.516452
chr19	47049157	47049657	chr19	47050906	47050907	0.718642
chr19	47049157	47049657	chr19	47067748	47067749	0.748597
chr19	47049157	47049657	chr19	47090766	47090767	0.694236
chr19	47359142	47359642	chr19	47580019	47580020	0.526607
chr19	53500369	53500869	chr19	53390573	53390574	0.592449
chr19	53500369	53500869	chr19	53600396	53600397	0.555195
chr19	53806503	53807003	chr19	53600396	53600397	0.581993
chr19	56619480	56619980	chr19	56826209	56826210	0.584758
chr19	56687662	56688162	chr19	56826209	56826210	0.684951
chr19	56825975	56826475	chr19	56826209	56826210	0.70945
chr19	58511929	58512429	chr19	58455398	58455399	0.902788
chr19	58511929	58512429	chr19	58511993	58511994	0.915936
chr2	3375353	3375853	chr2	3332628	3332629	0.657334
chr2	3543187	3543687	chr2	3332628	3332629	0.612269
chr2	3375353	3375853	chr2	3336168	3336169	0.664307
chr2	3543187	3543687	chr2	3336168	3336169	0.552442
chr2	3375353	3375853	chr2	3474986	3474987	0.793934
chr2	3543187	3543687	chr2	3474986	3474987	0.695555
chr2	3375353	3375853	chr2	3512814	3512815	0.545208
chr2	3543187	3543687	chr2	3512814	3512815	0.503557
chr2	4760692	4761192	chr2	4717831	4717832	0.505619
chr2	4802311	4802811	chr2	4717831	4717832	0.533539
chr2	4824034	4824534	chr2	4717831	4717832	0.509604
chr2	10311660	10312160	chr2	10080612	10080613	0.572235
chr2	10311660	10312160	chr2	10370451	10370452	0.7574
chr2	10370097	10370597	chr2	10370451	10370452	0.526374
chr2	11290160	11290660	chr2	11172382	11172383	0.803903
chr2	11293340	11293840	chr2	11172382	11172383	0.780555
chr2	13283010	13283510	chr2	13491876	13491877	0.660848
chr2	21034466	21034966	chr2	21205365	21205366	0.501391
chr2	21282264	21282764	chr2	21205365	21205366	0.711146
chr2	24281053	24281553	chr2	24475599	24475600	0.627911
chr2	24435674	24436174	chr2	24475599	24475600	0.809864
chr2	24474833	24475333	chr2	24475599	24475600	0.661177
chr2	24606520	24607020	chr2	24475599	24475600	0.525692
chr2	25094985	25095485	chr2	24949777	24949778	0.554614
chr2	25095488	25095988	chr2	24949777	24949778	0.543515
chr2	25846966	25847466	chr2	25847248	25847249	0.863996
chr2	25846966	25847466	chr2	25983282	25983283	0.631616
chr2	26138288	26138788	chr2	25983282	25983283	0.555153
chr2	25846966	25847466	chr2	26021760	26021761	0.751148
chr2	26138288	26138788	chr2	26021760	26021761	0.655342
chr2	26856460	26856960	chr2	26902813	26902814	0.536955
chr2	27486429	27486929	chr2	27515147	27515148	0.569007
chr2	28915966	28916466	chr2	29124992	29124993	0.536399
chr2	30057127	30057627	chr2	30171524	30171525	0.511413
chr2	30534437	30534937	chr2	30286433	30286434	0.500839
chr2	30534437	30534937	chr2	30359316	30359317	0.518008
chr2	31551913	31552413	chr2	31670737	31670738	0.674645
chr2	32132506	32133006	chr2	31974450	31974451	0.557581
chr2	32612187	32612687	chr2	32712784	32712785	0.649417
chr2	32750716	32751216	chr2	32712784	32712785	0.718258
chr2	32750716	32751216	chr2	32961255	32961256	0.548939
chr2	33370446	33370946	chr2	33468532	33468533	0.702895
chr2	33448982	33449482	chr2	33468532	33468533	0.662808
chr2	33468958	33469458	chr2	33468532	33468533	0.507357
chr2	33510788	33511288	chr2	33468532	33468533	0.644461
chr2	33652468	33652968	chr2	33468532	33468533	0.75377
chr2	34963370	34963870	chr2	34870962	34870963	0.547516
chr2	35015780	35016280	chr2	34870962	34870963	0.628746
chr2	34963370	34963870	chr2	35109492	35109493	0.570179
chr2	35933023	35933523	chr2	36136398	36136399	0.665347
chr2	36091211	36091711	chr2	36136398	36136399	0.662043
chr2	36093798	36094298	chr2	36136398	36136399	0.610765
chr2	36242577	36243077	chr2	36136398	36136399	0.745921
chr2	37786536	37787036	chr2	37703348	37703349	0.526033
chr2	37791118	37791618	chr2	37703348	37703349	0.505837
chr2	37794195	37794695	chr2	37703348	37703349	0.667477
chr2	38560429	38560929	chr2	38643906	38643907	0.620008
chr2	38647268	38647768	chr2	38643906	38643907	0.696808
chr2	38925315	38925815	chr2	38926503	38926504	0.534865
chr2	38975592	38976092	chr2	38926503	38926504	0.531686
chr2	38925315	38925815	chr2	39008139	39008140	0.526914
chr2	39420617	39421117	chr2	39226338	39226339	0.579678
chr2	45596577	45597077	chr2	45696605	45696606	0.697918
chr2	45724122	45724622	chr2	45696605	45696606	0.825974
chr2	45760687	45761187	chr2	45696605	45696606	0.926806
chr2	49375005	49375505	chr2	49619314	49619315	0.719851
chr2	61490402	61490902	chr2	61711694	61711695	0.519365
chr2	61492039	61492539	chr2	61711694	61711695	0.581734
chr2	61802794	61803294	chr2	61711694	61711695	0.505685
chr2	66002189	66002689	chr2	66124793	66124794	0.591866
chr2	71167126	71167626	chr2	71389260	71389261	0.718977
chr2	71751303	71751803	chr2	71873224	71873225	0.854051
chr2	71913890	71914390	chr2	71873224	71873225	0.590958
chr2	71965422	71965922	chr2	71873224	71873225	0.726522
chr2	72402279	72402779	chr2	72476219	72476220	0.553502
chr2	72667328	72667828	chr2	72476219	72476220	0.638526
chr2	75977886	75978386	chr2	75832177	75832178	0.545888
chr2	76248288	76248788	chr2	76360453	76360454	0.562609
chr2	76323307	76323807	chr2	76360453	76360454	0.6879
chr2	76332302	76332802	chr2	76360453	76360454	0.5841
chr2	76360197	76360697	chr2	76360453	76360454	0.937277
chr2	76585024	76585524	chr2	76360453	76360454	0.852424
chr2	76980122	76980622	chr2	76982547	76982548	0.524995
chr2	77176281	77176781	chr2	76982547	76982548	0.643965
chr2	84658825	84659325	chr2	84659079	84659080	0.942776
chr2	84790281	84790781	chr2	84659079	84659080	0.579248
chr2	84815514	84816014	chr2	84659079	84659080	0.845026
chr2	84822577	84823077	chr2	84659079	84659080	0.542065
chr2	84871692	84872192	chr2	84659079	84659080	0.517751
chr2	85129571	85130071	chr2	85136360	85136361	0.841545
chr2	85136452	85136952	chr2	85136360	85136361	0.5522
chr2	90636599	90637099	chr2	90847155	90847156	0.614051
chr2	91044678	91045178	chr2	90847155	90847156	0.582679
chr2	91045285	91045785	chr2	90847155	90847156	0.506153
chr2	90929111	90929611	chr2	90904740	90904741	0.510369
chr2	91030672	91031172	chr2	90904740	90904741	0.531416
chr2	91044678	91045178	chr2	90904740	90904741	0.61739
chr2	91045285	91045785	chr2	90904740	90904741	0.672808
chr2	91042619	91043119	chr2	91035627	91035628	0.659775
chr2	91261014	91261514	chr2	91035627	91035628	0.629325
chr2	90929111	90929611	chr2	91054016	91054017	0.578111
chr2	91030672	91031172	chr2	91054016	91054017	0.657293
chr2	91044678	91045178	chr2	91054016	91054017	0.661372
chr2	91045285	91045785	chr2	91054016	91054017	0.709057
chr2	91190368	91190868	chr2	91054016	91054017	0.636416
chr2	91261014	91261514	chr2	91054016	91054017	0.60635
chr2	91030672	91031172	chr2	91237066	91237067	0.697254
chr2	91042619	91043119	chr2	91237066	91237067	0.534285
chr2	91044678	91045178	chr2	91237066	91237067	0.671449
chr2	91045285	91045785	chr2	91237066	91237067	0.674108
chr2	91190368	91190868	chr2	91237066	91237067	0.698293
chr2	91261014	91261514	chr2	91237066	91237067	0.563032
chr2	91042619	91043119	chr2	91237146	91237147	0.545929
chr2	91629559	91630059	chr2	91636457	91636458	0.652529
chr2	91630197	91630697	chr2	91636457	91636458	0.885691
chr2	91635241	91635741	chr2	91636457	91636458	0.814623
chr2	91772533	91773033	chr2	91636457	91636458	0.827324
chr2	92370856	92371356	chr2	92371945	92371946	0.591174
chr2	92373825	92374325	chr2	92371945	92371946	0.656955
chr2	94272064	94272564	chr2	94438186	94438187	0.528865
chr2	101822793	101823293	chr2	101838980	101838981	0.630715
chr2	103810435	103810935	chr2	103761250	103761251	0.831337
chr2	103849101	103849601	chr2	103761250	103761251	0.543638
chr2	104471250	104471750	chr2	104590484	104590485	0.58154
chr2	104556522	104557022	chr2	104590484	104590485	0.851099
chr2	104681488	104681988	chr2	104590484	104590485	0.695834
chr2	104746235	104746735	chr2	104590484	104590485	0.673584
chr2	104556522	104557022	chr2	104742801	104742802	0.808951
chr2	104681488	104681988	chr2	104742801	104742802	0.722648
chr2	104746235	104746735	chr2	104742801	104742802	0.67037
chr2	104886057	104886557	chr2	104742801	104742802	0.756462
chr2	104681488	104681988	chr2	104886324	104886325	0.640884
chr2	104746235	104746735	chr2	104886324	104886325	0.619016
chr2	104886057	104886557	chr2	104886324	104886325	0.66264
chr2	106920223	106920723	chr2	106974397	106974398	0.719141
chr2	112000291	112000791	chr2	112239841	112239842	0.564526
chr2	112000915	112001415	chr2	112239841	112239842	0.561608
chr2	112209945	112210445	chr2	112259291	112259292	0.62304
chr2	114013124	114013624	chr2	114175339	114175340	0.531881
chr2	114353814	114354314	chr2	114175339	114175340	0.537543
chr2	118256489	118256989	chr2	118256966	118256967	0.553008
chr2	118271560	118272060	chr2	118256966	118256967	0.89567
chr2	118430857	118431357	chr2	118256966	118256967	0.722518
chr2	118256489	118256989	chr2	118479696	118479697	0.596178
chr2	119108492	119108992	chr2	119034790	119034791	0.540321
chr2	119277781	119278281	chr2	119034790	119034791	0.621391
chr2	119108492	119108992	chr2	119237360	119237361	0.521072
chr2	119236972	119237472	chr2	119237360	119237361	0.682066
chr2	119277781	119278281	chr2	119237360	119237361	0.933869
chr2	119293945	119294445	chr2	119237360	119237361	0.752793
chr2	119297361	119297861	chr2	119237360	119237361	0.556652
chr2	119236972	119237472	chr2	119271226	119271227	0.673305
chr2	119277781	119278281	chr2	119271226	119271227	0.900453
chr2	119293945	119294445	chr2	119271226	119271227	0.733535
chr2	119297361	119297861	chr2	119271226	119271227	0.544009
chr2	119508515	119509015	chr2	119271226	119271227	0.636188
chr2	119508515	119509015	chr2	119547627	119547628	0.677456
chr2	119665681	119666181	chr2	119547627	119547628	0.787167
chr2	127004242	127004742	chr2	127247816	127247817	0.695577
chr2	127128898	127129398	chr2	127247816	127247817	0.626251
chr2	127424909	127425409	chr2	127247816	127247817	0.768962
chr2	127424909	127425409	chr2	127425199	127425200	0.930739
chr2	127590074	127590574	chr2	127425199	127425200	0.858448
chr2	127424909	127425409	chr2	127587426	127587427	0.746748
chr2	127590074	127590574	chr2	127587426	127587427	0.716454
chr2	127590074	127590574	chr2	127831859	127831860	0.557917
chr2	128872231	128872731	chr2	128818303	128818304	0.557017
chr2	128872231	128872731	chr2	128944020	128944021	0.517672
chr2	128872231	128872731	chr2	129100996	129100997	0.62363
chr2	129253089	129253589	chr2	129100996	129100997	0.609973
chr2	132939112	132939612	chr2	132816054	132816055	0.640181
chr2	132945853	132946353	chr2	132816054	132816055	0.59041
chr2	132939112	132939612	chr2	132816141	132816142	0.539721
chr2	144393416	144393916	chr2	144270904	144270905	0.589709
chr2	144085170	144085670	chr2	144332080	144332081	0.663752
chr2	144332867	144333367	chr2	144332080	144332081	0.610268
chr2	144393416	144393916	chr2	144332080	144332081	0.868562
chr2	144393416	144393916	chr2	144599953	144599954	0.694415
chr2	144741955	144742455	chr2	144599953	144599954	0.737112
chr2	146838800	146839300	chr2	147013060	147013061	0.525063
chr2	150087198	150087698	chr2	150181755	150181756	0.537822
chr2	150181450	150181950	chr2	150181755	150181756	0.820035
chr2	150257226	150257726	chr2	150181755	150181756	0.906397
chr2	150412043	150412543	chr2	150181755	150181756	0.918761
chr2	150257226	150257726	chr2	150485063	150485064	0.914609
chr2	150412043	150412543	chr2	150485063	150485064	0.89908
chr2	150484893	150485393	chr2	150485063	150485064	0.818807
chr2	150643907	150644407	chr2	150485063	150485064	0.906732
chr2	150688175	150688675	chr2	150485063	150485064	0.6487
chr2	150688910	150689410	chr2	150485063	150485064	0.555578
chr2	150643907	150644407	chr2	150749081	150749082	0.618422
chr2	150933366	150933866	chr2	150749081	150749082	0.559918
chr2	151631367	151631867	chr2	151842927	151842928	0.533737
chr2	151669995	151670495	chr2	151842927	151842928	0.832077
chr2	151670514	151671014	chr2	151842927	151842928	0.80201
chr2	152095077	152095577	chr2	152143609	152143610	0.570501
chr2	152177160	152177660	chr2	152143609	152143610	0.763278
chr2	152391172	152391672	chr2	152143609	152143610	0.625174
chr2	152095077	152095577	chr2	152344060	152344061	0.544535
chr2	152177160	152177660	chr2	152344060	152344061	0.571706
chr2	152391172	152391672	chr2	152344060	152344061	0.565989
chr2	152539900	152540400	chr2	152687148	152687149	0.535985
chr2	154380529	154381029	chr2	154569892	154569893	0.50111
chr2	155742218	155742718	chr2	155751217	155751218	0.5772
chr2	155622529	155623029	chr2	155826925	155826926	0.612418
chr2	156333203	156333703	chr2	156196647	156196648	0.625615
chr2	157020425	157020925	chr2	157007075	157007076	0.62323
chr2	157021086	157021586	chr2	157007075	157007076	0.741277
chr2	158375387	158375887	chr2	158375638	158375639	0.620737
chr2	158397031	158397531	chr2	158375638	158375639	0.779956
chr2	158539618	158540118	chr2	158375638	158375639	0.743935
chr2	162807739	162808239	chr2	163054635	163054636	0.519073
chr2	164047354	164047854	chr2	163995197	163995198	0.613577
chr2	163947879	163948379	chr2	164025224	164025225	0.570505
chr2	164047354	164047854	chr2	164025224	164025225	0.555226
chr2	164199874	164200374	chr2	164025224	164025225	0.642847
chr2	163947879	163948379	chr2	164071169	164071170	0.680745
chr2	164032198	164032698	chr2	164071169	164071170	0.585602
chr2	164047354	164047854	chr2	164071169	164071170	0.557654
chr2	164199874	164200374	chr2	164071169	164071170	0.814667
chr2	163947879	163948379	chr2	164074178	164074179	0.595772
chr2	164032198	164032698	chr2	164074178	164074179	0.505487
chr2	164047354	164047854	chr2	164074178	164074179	0.709945
chr2	164199874	164200374	chr2	164074178	164074179	0.714583
chr2	163947879	163948379	chr2	164171113	164171114	0.671297
chr2	164032198	164032698	chr2	164171113	164171114	0.596931
chr2	164047354	164047854	chr2	164171113	164171114	0.543029
chr2	164199874	164200374	chr2	164171113	164171114	0.836926
chr2	164408354	164408854	chr2	164171113	164171114	0.634288
chr2	164413827	164414327	chr2	164171113	164171114	0.73261
chr2	164025120	164025620	chr2	164200117	164200118	0.567414
chr2	164032198	164032698	chr2	164200117	164200118	0.593966
chr2	164047354	164047854	chr2	164200117	164200118	0.615256
chr2	164199874	164200374	chr2	164200117	164200118	0.860196
chr2	164408354	164408854	chr2	164200117	164200118	0.670943
chr2	164413827	164414327	chr2	164200117	164200118	0.81594
chr2	164430692	164431192	chr2	164200117	164200118	0.695871
chr2	164199874	164200374	chr2	164332765	164332766	0.856408
chr2	164408354	164408854	chr2	164332765	164332766	0.677495
chr2	164413827	164414327	chr2	164332765	164332766	0.814032
chr2	164418788	164419288	chr2	164332765	164332766	0.520623
chr2	164430692	164431192	chr2	164332765	164332766	0.772123
chr2	164506955	164507455	chr2	164332765	164332766	0.844272
chr2	164430692	164431192	chr2	164443188	164443189	0.680055
chr2	164408354	164408854	chr2	164460971	164460972	0.569708
chr2	164413827	164414327	chr2	164460971	164460972	0.67394
chr2	164430692	164431192	chr2	164460971	164460972	0.59275
chr2	164506955	164507455	chr2	164460971	164460972	0.686425
chr2	164430692	164431192	chr2	164654966	164654967	0.529756
chr2	164506955	164507455	chr2	164746015	164746016	0.568565
chr2	164716099	164716599	chr2	164746015	164746016	0.521709
chr2	164716099	164716599	chr2	164822686	164822687	0.629426
chr2	165121186	165121686	chr2	164911750	164911751	0.578892
chr2	165716685	165717185	chr2	165896950	165896951	0.509251
chr2	166553409	166553909	chr2	166793767	166793768	0.558566
chr2	166553931	166554431	chr2	166793767	166793768	0.619403
chr2	166632579	166633079	chr2	166793767	166793768	0.830216
chr2	166683813	166684313	chr2	166793767	166793768	0.566485
chr2	167078452	167078952	chr2	166996299	166996300	0.638457
chr2	167104538	167105038	chr2	166996299	166996300	0.550617
chr2	167078452	167078952	chr2	167015313	167015314	0.667616
chr2	167101993	167102493	chr2	167015313	167015314	0.621272
chr2	167104538	167105038	chr2	167015313	167015314	0.616518
chr2	168231708	168232208	chr2	168230622	168230623	0.527604
chr2	168262637	168263137	chr2	168230622	168230623	0.659262
chr2	168311015	168311515	chr2	168230622	168230623	0.653976
chr2	168402759	168403259	chr2	168230622	168230623	0.581603
chr2	168441434	168441934	chr2	168230622	168230623	0.670423
chr2	168473416	168473916	chr2	168230622	168230623	0.503292
chr2	168545945	168546445	chr2	168742136	168742137	0.575541
chr2	168614127	168614627	chr2	168742136	168742137	0.578309
chr2	168765235	168765735	chr2	168742136	168742137	0.614485
chr2	168766125	168766625	chr2	168742136	168742137	0.507482
chr2	168767017	168767517	chr2	168742136	168742137	0.518946
chr2	168799129	168799629	chr2	168742136	168742137	0.563465
chr2	168807582	168808082	chr2	168742136	168742137	0.634231
chr2	168866377	168866877	chr2	168742136	168742137	0.710794
chr2	168935099	168935599	chr2	168742136	168742137	0.601106
chr2	168987304	168987804	chr2	168742136	168742137	0.511693
chr2	168545945	168546445	chr2	168767201	168767202	0.511415
chr2	168614127	168614627	chr2	168767201	168767202	0.638608
chr2	168765235	168765735	chr2	168767201	168767202	0.794904
chr2	168766125	168766625	chr2	168767201	168767202	0.62711
chr2	168767017	168767517	chr2	168767201	168767202	0.641133
chr2	168799129	168799629	chr2	168767201	168767202	0.726612
chr2	168807582	168808082	chr2	168767201	168767202	0.686703
chr2	168866377	168866877	chr2	168767201	168767202	0.816832
chr2	168935099	168935599	chr2	168767201	168767202	0.725055
chr2	168987304	168987804	chr2	168767201	168767202	0.70266
chr2	170142500	170143000	chr2	170142675	170142676	0.602762
chr2	170302769	170303269	chr2	170142675	170142676	0.561227
chr2	172770654	172771154	chr2	173000117	173000118	0.8242
chr2	172794713	172795213	chr2	173000117	173000118	0.864165
chr2	172979793	172980293	chr2	173000117	173000118	0.88472
chr2	173056809	173057309	chr2	173000117	173000118	0.607008
chr2	173118931	173119431	chr2	173000117	173000118	0.864494
chr2	173119576	173120076	chr2	173000117	173000118	0.826975
chr2	173205550	173206050	chr2	173000117	173000118	0.804122
chr2	172794713	172795213	chr2	173021902	173021903	0.812647
chr2	172979793	172980293	chr2	173021902	173021903	0.852312
chr2	173056809	173057309	chr2	173021902	173021903	0.566667
chr2	173118931	173119431	chr2	173021902	173021903	0.819905
chr2	173119576	173120076	chr2	173021902	173021903	0.758043
chr2	173205550	173206050	chr2	173021902	173021903	0.752695
chr2	174196670	174197170	chr2	174415804	174415805	0.615005
chr2	174284977	174285477	chr2	174415804	174415805	0.551109
chr2	174643837	174644337	chr2	174415804	174415805	0.676963
chr2	174644341	174644841	chr2	174415804	174415805	0.533035
[truncated: 2,360 more rows]

## Sheet: Cluster 3 p2g
chr1	38629141	38629641	chr1	38664955	38664956	0.562157
chr1	40233146	40233646	chr1	40324627	40324628	0.531148
chr1	43136542	43137042	chr1	43196761	43196762	0.56887
chr1	43196786	43197286	chr1	43196761	43196762	0.569957
chr1	43221127	43221627	chr1	43196761	43196762	0.587776
chr1	43244937	43245437	chr1	43196761	43196762	0.531128
chr1	73702464	73702964	chr1	73864466	73864467	0.687002
chr1	73758594	73759094	chr1	73864466	73864467	0.683588
chr1	73820478	73820978	chr1	73864466	73864467	0.559771
chr1	73822537	73823037	chr1	73864466	73864467	0.657573
chr1	73824328	73824828	chr1	73864466	73864467	0.81987
chr1	73952598	73953098	chr1	73864466	73864467	0.63553
chr1	73991220	73991720	chr1	73864466	73864467	0.721201
chr1	74007611	74008111	chr1	73864466	73864467	0.509708
chr1	74096548	74097048	chr1	73864466	73864467	0.545744
chr1	74807475	74807975	chr1	74713535	74713536	0.592684
chr1	82560269	82560769	chr1	82586849	82586850	0.810075
chr1	82560269	82560769	chr1	82586921	82586922	0.802559
chr1	87520508	87521008	chr1	87573870	87573871	0.605551
chr1	87700065	87700565	chr1	87573870	87573871	0.655978
chr1	87785617	87786117	chr1	87573870	87573871	0.513811
chr1	87786184	87786684	chr1	87573870	87573871	0.724658
chr1	87786774	87787274	chr1	87573870	87573871	0.51739
chr1	89412920	89413420	chr1	89454811	89454812	0.556621
chr1	89558136	89558636	chr1	89454811	89454812	0.551938
chr1	90650855	90651355	chr1	90843971	90843972	0.638075
chr1	90651518	90652018	chr1	90843971	90843972	0.531975
chr1	90656830	90657330	chr1	90843971	90843972	0.601971
chr1	90734161	90734661	chr1	90843971	90843972	0.542177
chr1	90775740	90776240	chr1	90843971	90843972	0.568125
chr1	91031450	91031950	chr1	90843971	90843972	0.622374
chr1	94035117	94035617	chr1	93861344	93861345	0.520803
chr1	133077881	133078381	chr1	132880355	132880356	0.595996
chr1	133917767	133918267	chr1	133907999	133908000	0.548089
chr1	134055835	134056335	chr1	133907999	133908000	0.557532
chr1	134057611	134058111	chr1	133907999	133908000	0.510057
chr1	134098398	134098898	chr1	133907999	133908000	0.643398
chr1	133843255	133843755	chr1	134079155	134079156	0.509229
chr1	133917767	133918267	chr1	134079155	134079156	0.514963
chr1	134096390	134096890	chr1	134079155	134079156	0.536142
chr1	134276082	134276582	chr1	134079155	134079156	0.625723
chr1	135554806	135555306	chr1	135324813	135324814	0.797333
chr1	135554806	135555306	chr1	135607295	135607296	0.561477
chr1	135668247	135668747	chr1	135607295	135607296	0.543673
chr1	135734185	135734685	chr1	135607295	135607296	0.565782
chr1	135741016	135741516	chr1	135607295	135607296	0.545777
chr1	135778659	135779159	chr1	135607295	135607296	0.586148
chr1	135554806	135555306	chr1	135729197	135729198	0.763408
chr1	135574623	135575123	chr1	135729197	135729198	0.669788
chr1	135668247	135668747	chr1	135729197	135729198	0.573585
chr1	135670339	135670839	chr1	135729197	135729198	0.525174
chr1	135734185	135734685	chr1	135729197	135729198	0.70804
chr1	135734703	135735203	chr1	135729197	135729198	0.563469
chr1	135741016	135741516	chr1	135729197	135729198	0.72013
chr1	135763679	135764179	chr1	135729197	135729198	0.572262
chr1	135778659	135779159	chr1	135729197	135729198	0.718541
chr1	135668247	135668747	chr1	135766085	135766086	0.528656
chr1	135734185	135734685	chr1	135766085	135766086	0.542523
chr1	135741016	135741516	chr1	135766085	135766086	0.63041
chr1	135778659	135779159	chr1	135766085	135766086	0.569954
chr1	135668247	135668747	chr1	135836334	135836335	0.511719
chr1	135734185	135734685	chr1	135836334	135836335	0.575
chr1	135741016	135741516	chr1	135836334	135836335	0.544663
chr1	135763679	135764179	chr1	135836334	135836335	0.544451
chr1	135778659	135779159	chr1	135836334	135836335	0.652133
chr1	136061294	136061794	chr1	135836334	135836335	0.688114
chr1	135964537	135965037	chr1	136052901	136052902	0.526862
chr1	136061294	136061794	chr1	136052901	136052902	0.675446
chr1	136094725	136095225	chr1	136052901	136052902	0.874488
chr1	136095248	136095748	chr1	136052901	136052902	0.698318
chr1	136102695	136103195	chr1	136052901	136052902	0.584445
chr1	136130073	136130573	chr1	136052901	136052902	0.50364
chr1	136133542	136134042	chr1	136052901	136052902	0.538436
chr1	136227219	136227719	chr1	136052901	136052902	0.715595
chr1	136228313	136228813	chr1	136052901	136052902	0.562198
chr1	135964537	135965037	chr1	136131401	136131402	0.513374
chr1	136061294	136061794	chr1	136131401	136131402	0.712978
chr1	136094725	136095225	chr1	136131401	136131402	0.889155
chr1	136095248	136095748	chr1	136131401	136131402	0.697938
chr1	136102695	136103195	chr1	136131401	136131402	0.58899
chr1	136130073	136130573	chr1	136131401	136131402	0.51268
chr1	136131088	136131588	chr1	136131401	136131402	0.503042
chr1	136133542	136134042	chr1	136131401	136131402	0.540747
chr1	136227219	136227719	chr1	136131401	136131402	0.728015
chr1	136228313	136228813	chr1	136131401	136131402	0.510812
chr1	151890250	151890750	chr1	152090320	152090321	0.52223
chr1	154117636	154118136	chr1	153899929	153899930	0.62334
chr1	155222176	155222676	chr1	155146780	155146781	0.50471
chr1	159889279	159889779	chr1	160044380	160044381	0.503463
chr1	159922955	159923455	chr1	160044380	160044381	0.532844
chr1	160037210	160037710	chr1	160044380	160044381	0.578441
chr1	165717788	165718288	chr1	165634541	165634542	0.518327
chr1	165589179	165589679	chr1	165708094	165708095	0.549722
chr1	165592335	165592835	chr1	165708094	165708095	0.706683
chr1	165717788	165718288	chr1	165708094	165708095	0.741629
chr1	170064120	170064620	chr1	170110559	170110560	0.533658
chr1	171113843	171114343	chr1	171250422	171250423	0.574568
chr1	171221452	171221952	chr1	171250422	171250423	0.555136
chr1	171239993	171240493	chr1	171250422	171250423	0.620096
chr1	171249327	171249827	chr1	171250422	171250423	0.571828
chr1	171260807	171261307	chr1	171250422	171250423	0.514071
chr1	172297807	172298307	chr1	172298064	172298065	0.760562
chr1	179714851	179715351	chr1	179668231	179668232	0.508762
chr1	189165043	189165543	chr1	189402273	189402274	0.666931
chr1	189165659	189166159	chr1	189402273	189402274	0.637315
chr1	189217579	189218079	chr1	189402273	189402274	0.518973
chr1	189305489	189305989	chr1	189402273	189402274	0.626222
chr1	189437204	189437704	chr1	189402273	189402274	0.501323
chr1	189495743	189496243	chr1	189402273	189402274	0.711583
chr1	190972601	190973101	chr1	190911770	190911771	0.548169
chr1	190972601	190973101	chr1	190979296	190979297	0.569764
chr1	192070625	192071125	chr1	192092599	192092600	0.517754
chr1	193315932	193316432	chr1	193370282	193370283	0.503153
chr10	24634291	24634791	chr10	24595442	24595443	0.504592
chr10	39534237	39534737	chr10	39612934	39612935	0.588965
chr10	39646499	39646999	chr10	39612934	39612935	0.569144
chr10	42934708	42935208	chr10	42860512	42860513	0.737326
chr10	42962079	42962579	chr10	42860512	42860513	0.518957
chr10	60807746	60808246	chr10	60831581	60831582	0.523882
chr10	61085025	61085525	chr10	61171964	61171965	0.519277
chr10	61216182	61216682	chr10	61171964	61171965	0.628994
chr10	61273754	61274254	chr10	61171964	61171965	0.549576
chr10	61308436	61308936	chr10	61171964	61171965	0.650673
chr10	61308947	61309447	chr10	61171964	61171965	0.624882
chr10	61325903	61326403	chr10	61171964	61171965	0.53402
chr10	61328385	61328885	chr10	61171964	61171965	0.526987
chr10	61331027	61331527	chr10	61171964	61171965	0.657535
chr10	61357780	61358280	chr10	61171964	61171965	0.69329
chr10	61358348	61358848	chr10	61171964	61171965	0.556794
chr10	61216182	61216682	chr10	61273438	61273439	0.55424
chr10	61273754	61274254	chr10	61273438	61273439	0.526644
chr10	61308436	61308936	chr10	61273438	61273439	0.536655
chr10	61331027	61331527	chr10	61273438	61273439	0.573869
chr10	61357780	61358280	chr10	61273438	61273439	0.619019
chr10	61826935	61827435	chr10	61979108	61979109	0.595688
chr10	61866102	61866602	chr10	61979108	61979109	0.512328
chr10	62085933	62086433	chr10	61979108	61979109	0.512265
chr10	67038873	67039373	chr10	67096125	67096126	0.51444
chr10	70159639	70160139	chr10	70245276	70245277	0.556593
chr10	71194666	71195166	chr10	71159634	71159635	0.520238
chr10	75446036	75446536	chr10	75316877	75316878	0.518171
chr10	75551810	75552310	chr10	75798584	75798585	0.502538
chr10	75588428	75588928	chr10	75798584	75798585	0.531971
chr10	75610423	75610923	chr10	75798584	75798585	0.522728
chr10	76643092	76643592	chr10	76623404	76623405	0.61181
chr10	76643092	76643592	chr10	76726044	76726045	0.614645
chr10	77116583	77117083	chr10	77032739	77032740	0.534867
chr10	77658563	77659063	chr10	77606097	77606098	0.560274
chr10	78452548	78453048	chr10	78591964	78591965	0.51175
chr10	79852072	79852572	chr10	79988600	79988601	0.62481
chr10	79932674	79933174	chr10	79988600	79988601	0.544146
chr10	80058183	80058683	chr10	79988600	79988601	0.620925
chr10	80084777	80085277	chr10	79988600	79988601	0.582485
chr10	80161528	80162028	chr10	79988600	79988601	0.588814
chr10	80165667	80166167	chr10	79988600	79988601	0.67205
chr10	80165667	80166167	chr10	80399531	80399532	0.542781
chr10	80627603	80628103	chr10	80622780	80622781	0.586141
chr10	80629244	80629744	chr10	80622780	80622781	0.548062
chr10	81253021	81253521	chr10	81176631	81176632	0.653056
chr10	81259379	81259879	chr10	81176631	81176632	0.630246
chr10	81411027	81411527	chr10	81176631	81176632	0.623275
chr10	81411611	81412111	chr10	81176631	81176632	0.581614
chr10	81253021	81253521	chr10	81194691	81194692	0.577491
chr10	81259379	81259879	chr10	81194691	81194692	0.755117
chr10	81411027	81411527	chr10	81194691	81194692	0.722063
chr10	81411611	81412111	chr10	81194691	81194692	0.74597
chr10	81253021	81253521	chr10	81233163	81233164	0.506073
chr10	81259379	81259879	chr10	81233163	81233164	0.574035
chr10	81302823	81303323	chr10	81233163	81233164	0.534861
chr10	81253021	81253521	chr10	81292963	81292964	0.57323
chr10	81411027	81411527	chr10	81292963	81292964	0.511686
chr10	81411611	81412111	chr10	81292963	81292964	0.51491
chr10	85962924	85963424	chr10	86011860	86011861	0.5353
chr10	86123209	86123709	chr10	86300412	86300413	0.568484
chr10	86126458	86126958	chr10	86300412	86300413	0.596469
chr10	120707784	120708284	chr10	120898971	120898972	0.692531
chr10	120733459	120733959	chr10	120898971	120898972	0.527473
chr10	126988663	126989163	chr10	127060184	127060185	0.507401
chr10	127081380	127081880	chr10	127060184	127060185	0.537883
chr10	126986575	126987075	chr10	127190054	127190055	0.50124
chr10	127081380	127081880	chr10	127190054	127190055	0.544188
chr10	127593980	127594480	chr10	127621148	127621149	0.558153
chr10	127594538	127595038	chr10	127621148	127621149	0.546569
chr10	127595265	127595765	chr10	127621148	127621149	0.671376
chr10	127602853	127603353	chr10	127621148	127621149	0.629047
chr10	127614189	127614689	chr10	127621148	127621149	0.521038
chr10	127721792	127722292	chr10	127621148	127621149	0.794254
chr10	127595265	127595765	chr10	127724478	127724479	0.575373
chr10	127721792	127722292	chr10	127724478	127724479	0.743682
chr10	128225960	128226460	chr10	128035346	128035347	0.681921
chr11	3573043	3573543	chr11	3514702	3514703	0.536591
chr11	3573043	3573543	chr11	3539292	3539293	0.686153
chr11	4620557	4621057	chr11	4849544	4849545	0.537077
chr11	11968744	11969244	chr11	12037420	12037421	0.510395
chr11	31386437	31386937	chr11	31370061	31370062	0.553767
chr11	31461294	31461794	chr11	31370061	31370062	0.550045
chr11	31464811	31465311	chr11	31370061	31370062	0.519763
chr11	31480673	31481173	chr11	31370061	31370062	0.644585
chr11	31481278	31481778	chr11	31370061	31370062	0.574131
chr11	31550782	31551282	chr11	31370061	31370062	0.514745
chr11	31551321	31551821	chr11	31370061	31370062	0.653543
chr11	31591706	31592206	chr11	31370061	31370062	0.541189
chr11	32228418	32228918	chr11	32222293	32222294	0.566377
chr11	32232865	32233365	chr11	32222293	32222294	0.740277
chr11	32235524	32236024	chr11	32222293	32222294	0.536907
chr11	32243495	32243995	chr11	32222293	32222294	0.651323
chr11	32244219	32244719	chr11	32222293	32222294	0.521752
chr11	32228418	32228918	chr11	32226505	32226506	0.566936
chr11	32232865	32233365	chr11	32226505	32226506	0.690299
chr11	32235524	32236024	chr11	32226505	32226506	0.53897
chr11	32243495	32243995	chr11	32226505	32226506	0.636097
chr11	32244219	32244719	chr11	32226505	32226506	0.548679
chr11	33963026	33963526	chr11	33993193	33993194	0.798569
chr11	34010605	34011105	chr11	33993193	33993194	0.577449
chr11	33963026	33963526	chr11	33963013	33963014	0.75328
chr11	34010605	34011105	chr11	33963013	33963014	0.506557
chr11	35120813	35121313	chr11	35121456	35121457	0.578808
chr11	35142638	35143138	chr11	35121456	35121457	0.606581
chr11	35270686	35271186	chr11	35121456	35121457	0.562837
chr11	35288070	35288570	chr11	35121456	35121457	0.515422
chr11	43483269	43483769	chr11	43474306	43474307	0.626197
chr11	43618268	43618768	chr11	43474306	43474307	0.523469
chr11	43626026	43626526	chr11	43474306	43474307	0.581608
chr11	43483269	43483769	chr11	43681998	43681999	0.511466
chr11	43626026	43626526	chr11	43681998	43681999	0.567946
chr11	48568722	48569222	chr11	48800360	48800361	0.528629
chr11	48605097	48605597	chr11	48800360	48800361	0.538335
chr11	59964783	59965283	chr11	59964944	59964945	0.520907
chr11	62193044	62193544	chr11	62248984	62248985	0.556945
chr11	62257524	62258024	chr11	62248984	62248985	0.549997
chr11	65386682	65387182	chr11	65269989	65269990	0.563254
chr11	72389350	72389850	chr11	72411713	72411714	0.56734
chr11	72396450	72396950	chr11	72411713	72411714	0.629482
chr11	72991905	72992405	chr11	73177083	73177084	0.50288
chr11	75012871	75013371	chr11	75170255	75170256	0.590471
chr11	75168957	75169457	chr11	75170255	75170256	0.627921
chr11	75267915	75268415	chr11	75170255	75170256	0.515202
chr11	74992334	74992834	chr11	75193993	75193994	0.551556
chr11	75012871	75013371	chr11	75193993	75193994	0.505264
chr11	75172283	75172783	chr11	75193993	75193994	0.551077
chr11	76324011	76324511	chr11	76399141	76399142	0.500328
chr11	76352859	76353359	chr11	76399141	76399142	0.500993
chr11	76437012	76437512	chr11	76399141	76399142	0.607938
chr11	78163793	78164293	chr11	78188427	78188428	0.538452
chr11	78984706	78985206	chr11	78984924	78984925	0.505623
chr11	88097105	88097605	chr11	88099146	88099147	0.581884
chr11	88113459	88113959	chr11	88099146	88099147	0.644403
chr11	88118689	88119189	chr11	88099146	88099147	0.531262
chr11	88181156	88181656	chr11	88099146	88099147	0.603842
chr11	88186268	88186768	chr11	88099146	88099147	0.583292
chr11	89839669	89840169	chr11	90030348	90030349	0.58696
chr11	89856373	89856873	chr11	90030348	90030349	0.633443
chr11	90054390	90054890	chr11	90030348	90030349	0.719316
chr11	90094915	90095415	chr11	90030348	90030349	0.588405
chr11	94242973	94243473	chr11	94242579	94242580	0.625528
chr11	94958006	94958506	chr11	95076811	95076812	0.71489
chr11	95073899	95074399	chr11	95076811	95076812	0.559798
chr11	95087485	95087985	chr11	95076811	95076812	0.557553
chr11	95263724	95264224	chr11	95076811	95076812	0.623905
chr11	98942719	98943219	chr11	99041260	99041261	0.575571
chr11	100790579	100791079	chr11	100970617	100970618	0.557777
chr11	101162680	101163180	chr11	100970617	100970618	0.541569
chr11	101162680	101163180	chr11	101246334	101246335	0.512638
chr11	101820746	101821246	chr11	101894354	101894355	0.634573
chr11	101830025	101830525	chr11	101894354	101894355	0.53189
chr11	101831956	101832456	chr11	101894354	101894355	0.56729
chr11	101867796	101868296	chr11	101894354	101894355	0.500574
chr11	101881566	101882066	chr11	101894354	101894355	0.72435
chr11	101882109	101882609	chr11	101894354	101894355	0.525395
chr11	101885220	101885720	chr11	101894354	101894355	0.608936
chr11	101886666	101887166	chr11	101894354	101894355	0.589748
chr11	102051490	102051990	chr11	101894354	101894355	0.642432
chr11	102445453	102445953	chr11	102447663	102447664	0.630036
chr11	102445958	102446458	chr11	102447663	102447664	0.630758
chr11	102624162	102624662	chr11	102447663	102447664	0.582526
chr11	102445453	102445953	chr11	102579119	102579120	0.599144
chr11	102445453	102445953	chr11	102604431	102604432	0.540051
chr11	102770547	102771047	chr11	102836296	102836297	0.559512
chr11	103648020	103648520	chr11	103649509	103649510	0.784764
chr11	103649294	103649794	chr11	103649509	103649510	0.619464
chr11	103649900	103650400	chr11	103649509	103649510	0.521713
chr11	103665666	103666166	chr11	103649509	103649510	0.530151
chr11	103666304	103666804	chr11	103649509	103649510	0.69689
chr11	105936213	105936713	chr11	105967945	105967946	0.713896
chr11	105951398	105951898	chr11	105967945	105967946	0.571062
chr11	108299814	108300314	chr11	108343888	108343889	0.588552
chr11	109344064	109344564	chr11	109473374	109473375	0.570376
chr11	109845859	109846359	chr11	109995816	109995817	0.506556
chr11	114780093	114780593	chr11	114851532	114851533	0.553632
chr11	114795150	114795650	chr11	114851532	114851533	0.612936
chr11	114844039	114844539	chr11	114851532	114851533	0.529496
chr11	116494381	116494881	chr11	116654313	116654314	0.618633
chr11	116554117	116554617	chr11	116654313	116654314	0.567905
chr11	116643729	116644229	chr11	116654313	116654314	0.602308
chr11	116812610	116813110	chr11	116654313	116654314	0.596685
chr11	116814507	116815007	chr11	116828046	116828047	0.583003
chr11	117881600	117882100	chr11	117969366	117969367	0.744566
chr11	117882122	117882622	chr11	117969366	117969367	0.586995
chr11	117890918	117891418	chr11	117969366	117969367	0.537103
chr11	117930643	117931143	chr11	117969366	117969367	0.531027
chr11	117949653	117950153	chr11	117969366	117969367	0.707252
chr11	117962136	117962636	chr11	117969366	117969367	0.737022
chr11	118133553	118134053	chr11	117969366	117969367	0.575931
chr11	118165536	118166036	chr11	117969366	117969367	0.728933
chr11	118165536	118166036	chr11	118355411	118355412	0.537916
chr11	118729403	118729903	chr11	118911597	118911598	0.50799
chr11	120665387	120665887	chr11	120784204	120784205	0.55079
chr11	121014861	121015361	chr11	120784204	120784205	0.534717
chr12	28817278	28817778	chr12	28635953	28635954	0.59453
chr12	31191291	31191791	chr12	31265294	31265295	0.510716
chr12	31275857	31276357	chr12	31265294	31265295	0.52331
chr12	76553893	76554393	chr12	76404176	76404177	0.515528
chr12	76553893	76554393	chr12	76533560	76533561	0.635716
chr12	76589373	76589873	chr12	76533560	76533561	0.546154
chr12	79925417	79925917	chr12	80113013	80113014	0.563539
chr12	79942609	79943109	chr12	80113013	80113014	0.728762
chr12	79943229	79943729	chr12	80113013	80113014	0.50898
chr12	79948456	79948956	chr12	80113013	80113014	0.573041
chr12	79949027	79949527	chr12	80113013	80113014	0.792511
chr12	79989557	79990057	chr12	80113013	80113014	0.507109
chr12	79994018	79994518	chr12	80113013	80113014	0.555046
chr12	80229990	80230490	chr12	80113013	80113014	0.566539
chr12	80014855	80015355	chr12	80260371	80260372	0.555759
chr12	80123409	80123909	chr12	80260371	80260372	0.641292
chr12	80229990	80230490	chr12	80260371	80260372	0.625539
chr12	80275140	80275640	chr12	80260371	80260372	0.512256
chr12	84894214	84894714	chr12	84876495	84876496	0.559882
chr12	85195206	85195706	chr12	85177313	85177314	0.545565
chr12	88621137	88621637	chr12	88722876	88722877	0.565492
chr12	103359091	103359591	chr12	103356001	103356002	0.634786
chr12	111687331	111687831	chr12	111672338	111672339	0.642037
chr12	111687882	111688382	chr12	111672338	111672339	0.52891
chr12	111852893	111853393	chr12	111944482	111944483	0.601215
chr12	111920045	111920545	chr12	111944482	111944483	0.623254
chr12	111944233	111944733	chr12	111944482	111944483	0.517028
chr12	111945801	111946301	chr12	111944482	111944483	0.559301
chr12	113028014	113028514	chr12	113185903	113185904	0.647924
chr12	113028818	113029318	chr12	113185903	113185904	0.503264
chr13	13573661	13574161	chr13	13437602	13437603	0.625492
chr13	45576108	45576608	chr13	45507444	45507445	0.506649
chr13	49245869	49246369	chr13	49216026	49216027	0.585034
chr13	51408403	51408903	chr13	51408618	51408619	0.526211
chr13	51411258	51411758	chr13	51408618	51408619	0.517719
chr13	54148872	54149372	chr13	54371349	54371350	0.599687
chr13	54202372	54202872	chr13	54371349	54371350	0.617352
chr13	54248550	54249050	chr13	54371349	54371350	0.636055
chr13	54249196	54249696	chr13	54371349	54371350	0.660464
chr13	54331538	54332038	chr13	54371349	54371350	0.714541
chr13	54332149	54332649	chr13	54371349	54371350	0.785104
chr13	56386254	56386754	chr13	56296551	56296552	0.699014
chr13	60897239	60897739	chr13	60936625	60936626	0.824981
chr13	62865655	62866155	chr13	62964893	62964894	0.54771
chr13	63725144	63725644	chr13	63565520	63565521	0.513733
chr13	73735108	73735608	chr13	73847631	73847632	0.516835
chr13	73907062	73907562	chr13	73847631	73847632	0.539141
chr13	94134651	94135151	chr13	94057796	94057797	0.520824
chr13	94135171	94135671	chr13	94057796	94057797	0.655666
chr14	20595778	20596278	chr14	20656540	20656541	0.51493
chr14	20650946	20651446	chr14	20656540	20656541	0.559997
chr14	27066274	27066774	chr14	27039001	27039002	0.542453
chr14	27148466	27148966	chr14	27039001	27039002	0.504519
chr14	30593290	30593790	chr14	30626208	30626209	0.523979
chr14	34565157	34565657	chr14	34588681	34588682	0.531016
chr14	34565672	34566172	chr14	34588681	34588682	0.609227
chr14	51985810	51986310	chr14	51913488	51913489	0.534436
chr14	51985810	51986310	chr14	51984833	51984834	0.512146
chr14	55564264	55564764	chr14	55560029	55560030	0.666709
chr14	55575156	55575656	chr14	55560029	55560030	0.558741
chr14	55564264	55564764	chr14	55758424	55758425	0.502397
chr14	55855124	55855624	chr14	55854115	55854116	0.511948
chr14	57758179	57758679	chr14	57524829	57524830	0.517475
chr14	61350938	61351438	chr14	61360445	61360446	0.554678
chr14	62259061	62259561	chr14	62292979	62292980	0.803733
chr14	62536010	62536510	chr14	62292979	62292980	0.517153
chr14	63957700	63958200	chr14	63943706	63943707	0.682954
chr14	70192015	70192515	chr14	70177672	70177673	0.520123
chr14	70474374	70474874	chr14	70520260	70520261	0.549981
chr14	103815446	103815946	chr14	103844476	103844477	0.529074
chr14	103843514	103844014	chr14	103844476	103844477	0.575255
chr14	103844200	103844700	chr14	103844476	103844477	0.540919
chr14	118922076	118922576	chr14	118925470	118925471	0.594257
chr15	10869836	10870336	chr15	10952332	10952333	0.505686
chr15	10951807	10952307	chr15	10952332	10952333	0.504676
chr15	10814608	10815108	chr15	11064790	11064791	0.575064
chr15	10818064	10818564	chr15	11064790	11064791	0.716093
chr15	32042112	32042612	chr15	32244813	32244814	0.544996
chr15	34820613	34821113	chr15	34678706	34678707	0.552695
chr15	34829337	34829837	chr15	34678706	34678707	0.580066
chr15	34820613	34821113	chr15	34837355	34837356	0.715441
chr15	34821189	34821689	chr15	34837355	34837356	0.599174
chr15	34829337	34829837	chr15	34837355	34837356	0.684638
chr15	34837908	34838408	chr15	34837355	34837356	0.617015
chr15	34846484	34846984	chr15	34837355	34837356	0.608682
chr15	37720002	37720502	chr15	37792428	37792429	0.575318
[truncated: 906 more rows]

## Sheet: Cluster 4 p2g
chr1	9758087	9758587	chr1	9548046	9548047	0.662701
[truncated: 2,392 more rows]

[truncated: 2 more sheets: Cluster 5 p2g, Cluster 6 p2g]
