# Supplementary material for: The single-cell chromatin accessibility landscape in mouse perinatal testis development
Source: eLife journal article supplement (doi:10.7554/elife.75624), 2023-04-25
Supplement: supp [file elife-75624-supp-v1.zip › elife_poa_e75624_Supplementary_file_6.xlsx]

## Sheet: antibodies used in this study
	Company	Catalog #	Dilution	Application
Primary antibody (clone)
Rabbit anti-DLK1 mAb (1168B)	R&D Systems	MAB8634	1:100/ 1:400	IF/FACS
Rat anti-GCRA1/TRA98 mAb	Abcam	ab82527	02:40:00	IF
Mouse anti-MIS/AMH mAb (B-11)	Santa Cruz	SC-166752	1/50	IF
Rabbit anti-MBD3 mAb (EPR18258)	Abcam	ab188401	02:40:00	IF
Rabbit anti-STF-1/NR5A1 mAb (D1Z2A) mAb	CST	12800S	02:40:00	IF
Secondary antibody
Rhodamine Red-X Donkey anti-Rabbit IgG (H+L)	Jackson Immunoresearch	711-295-152	09:20:00	IF/FACS
Goat anti Mouse IgG (H+L) Cross Adsorbed Secondary Antibody, Alexa Fluor 488	Fisher Scientific	A11001	09:20:00	IF
Donkey anti Rat IgG (H+L) Secondary Antibody, Alexa Fluor 594, Invitrogen	Fisher Scientific	A21209	09:20:00	IF
