# Supplementary figures and images for: The single-cell chromatin accessibility landscape in mouse perinatal testis development
Source: eLife journal article supplement (doi:10.7554/elife.75624), 2023-04-25

Figure 3-figure supplement 1

**A**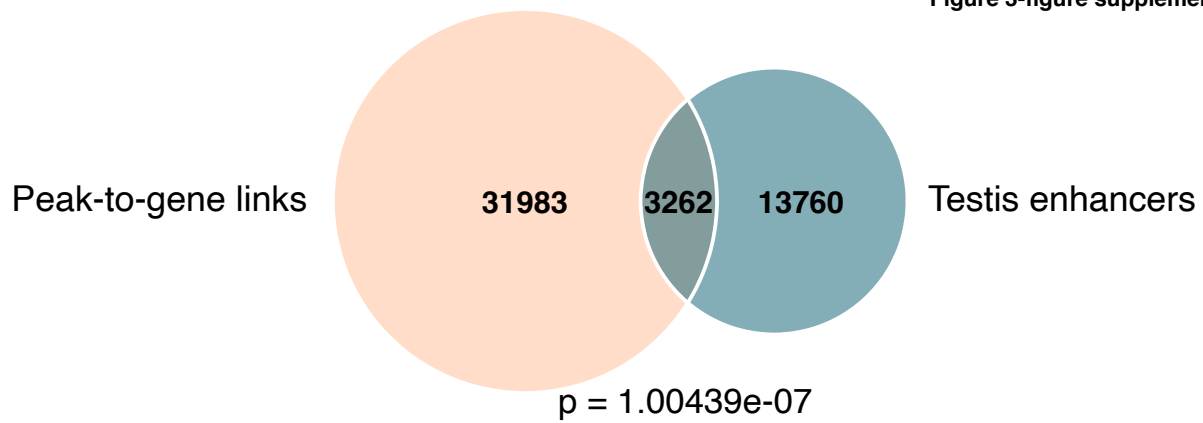**B**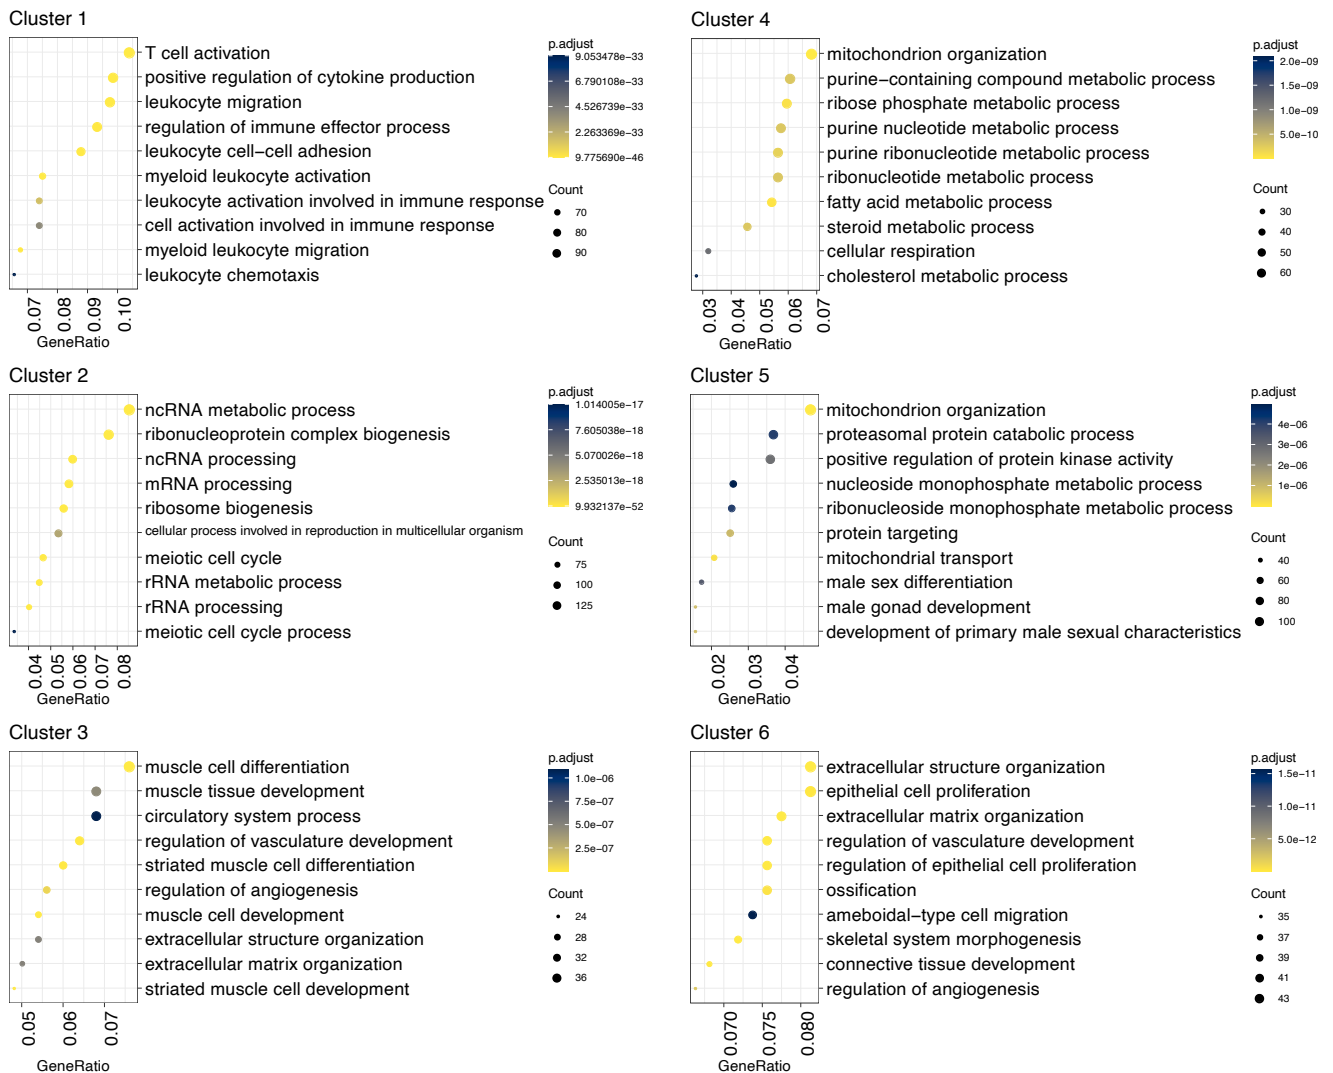

Supplement: supp [file elife-75624-supp-v1.zip]

Figure 4-figure supplement 3

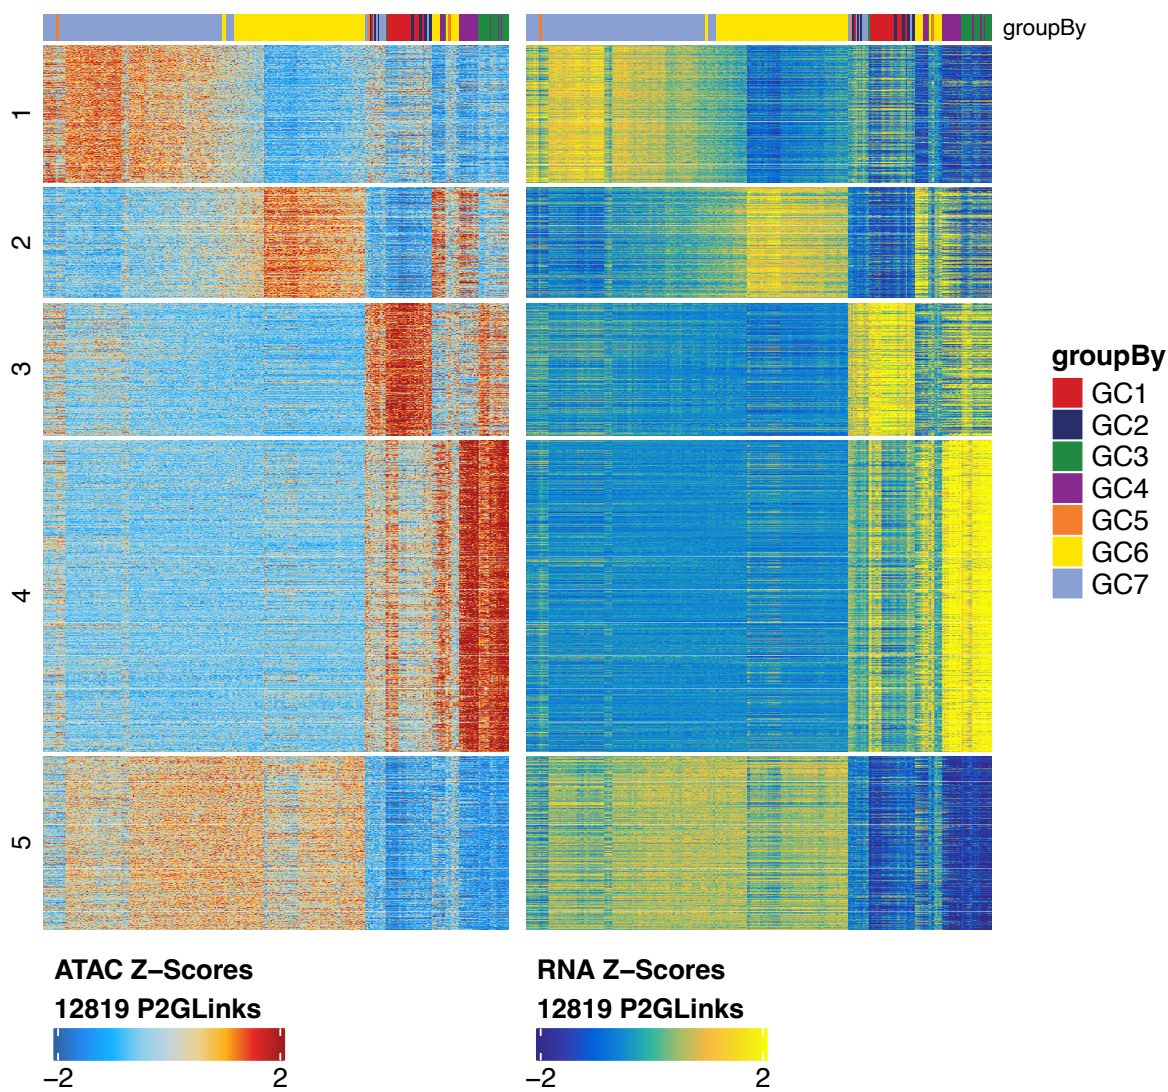

Supplement: supp [file elife-75624-supp-v1.zip]

**A****Feature Distribution**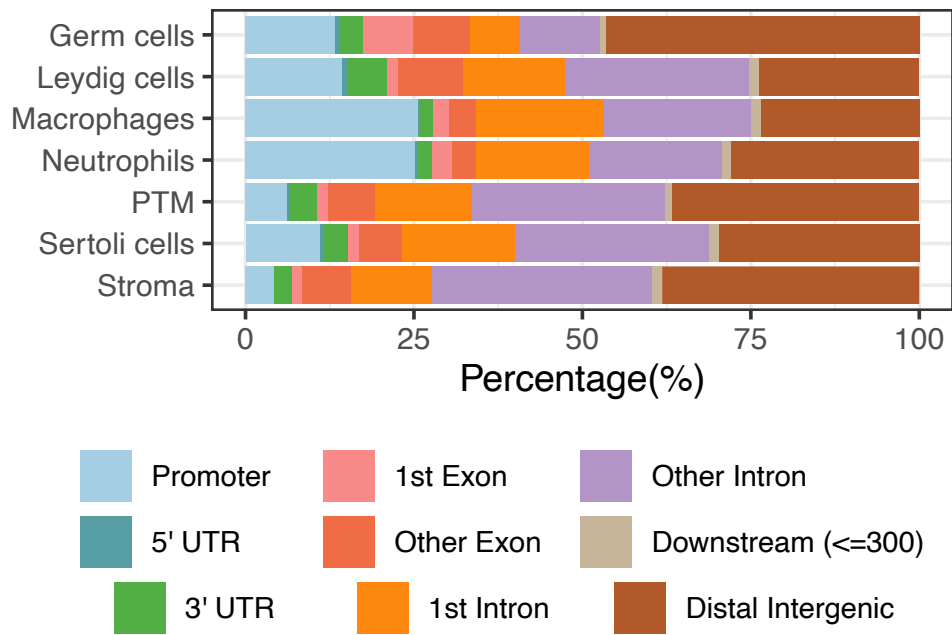**B****Sertoli cell DNase I hypersensitive sites**  
(Maatouk et al.)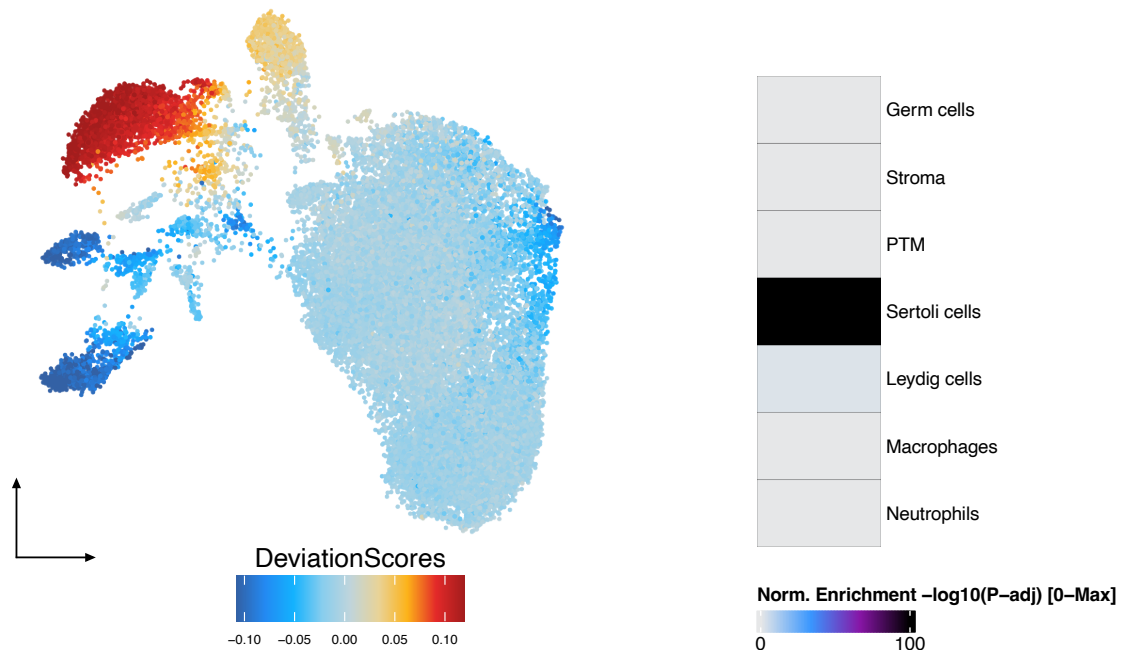

Supplement: supp [file elife-75624-supp-v1.zip]

**Figure 5-figure supplement 3**

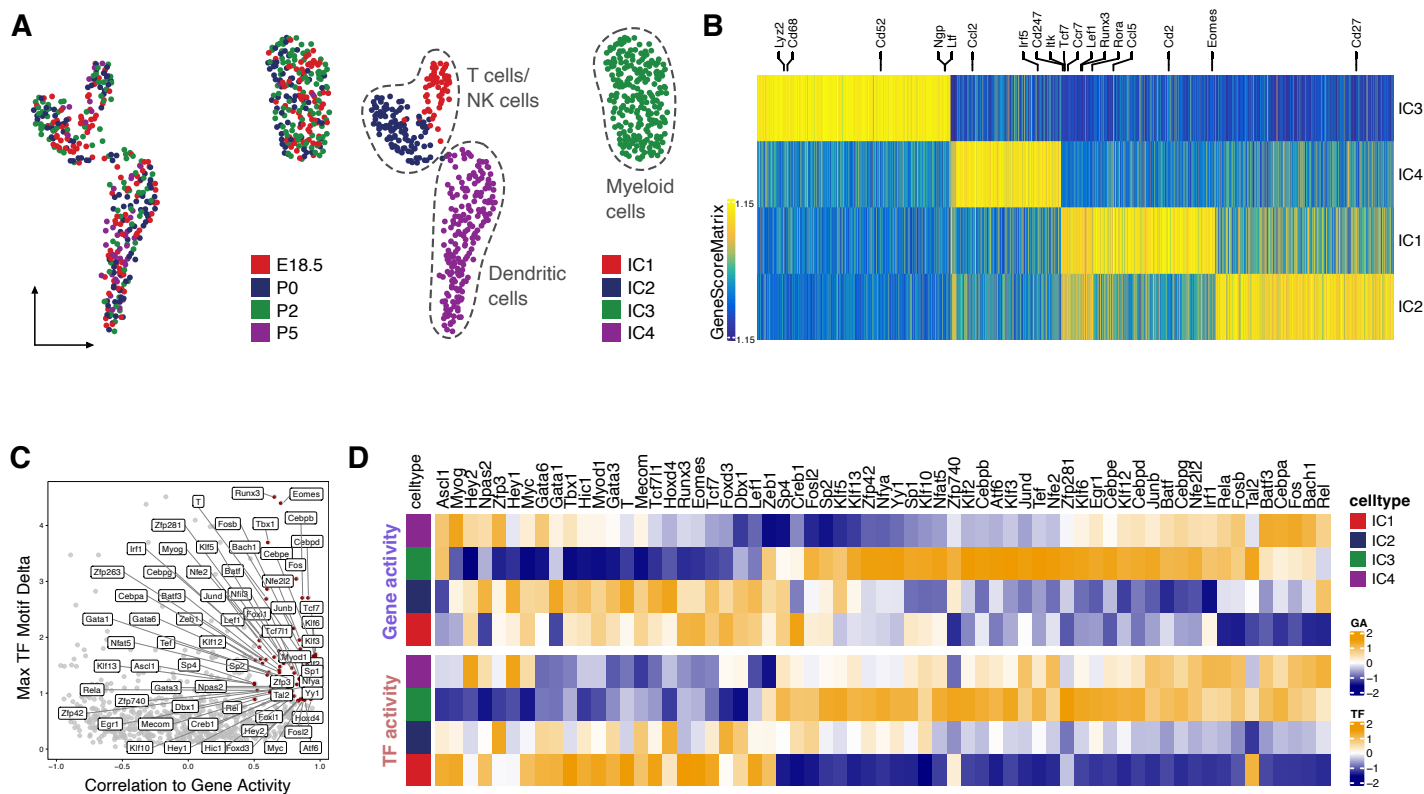

Supplement: supp [file elife-75624-supp-v1.zip]

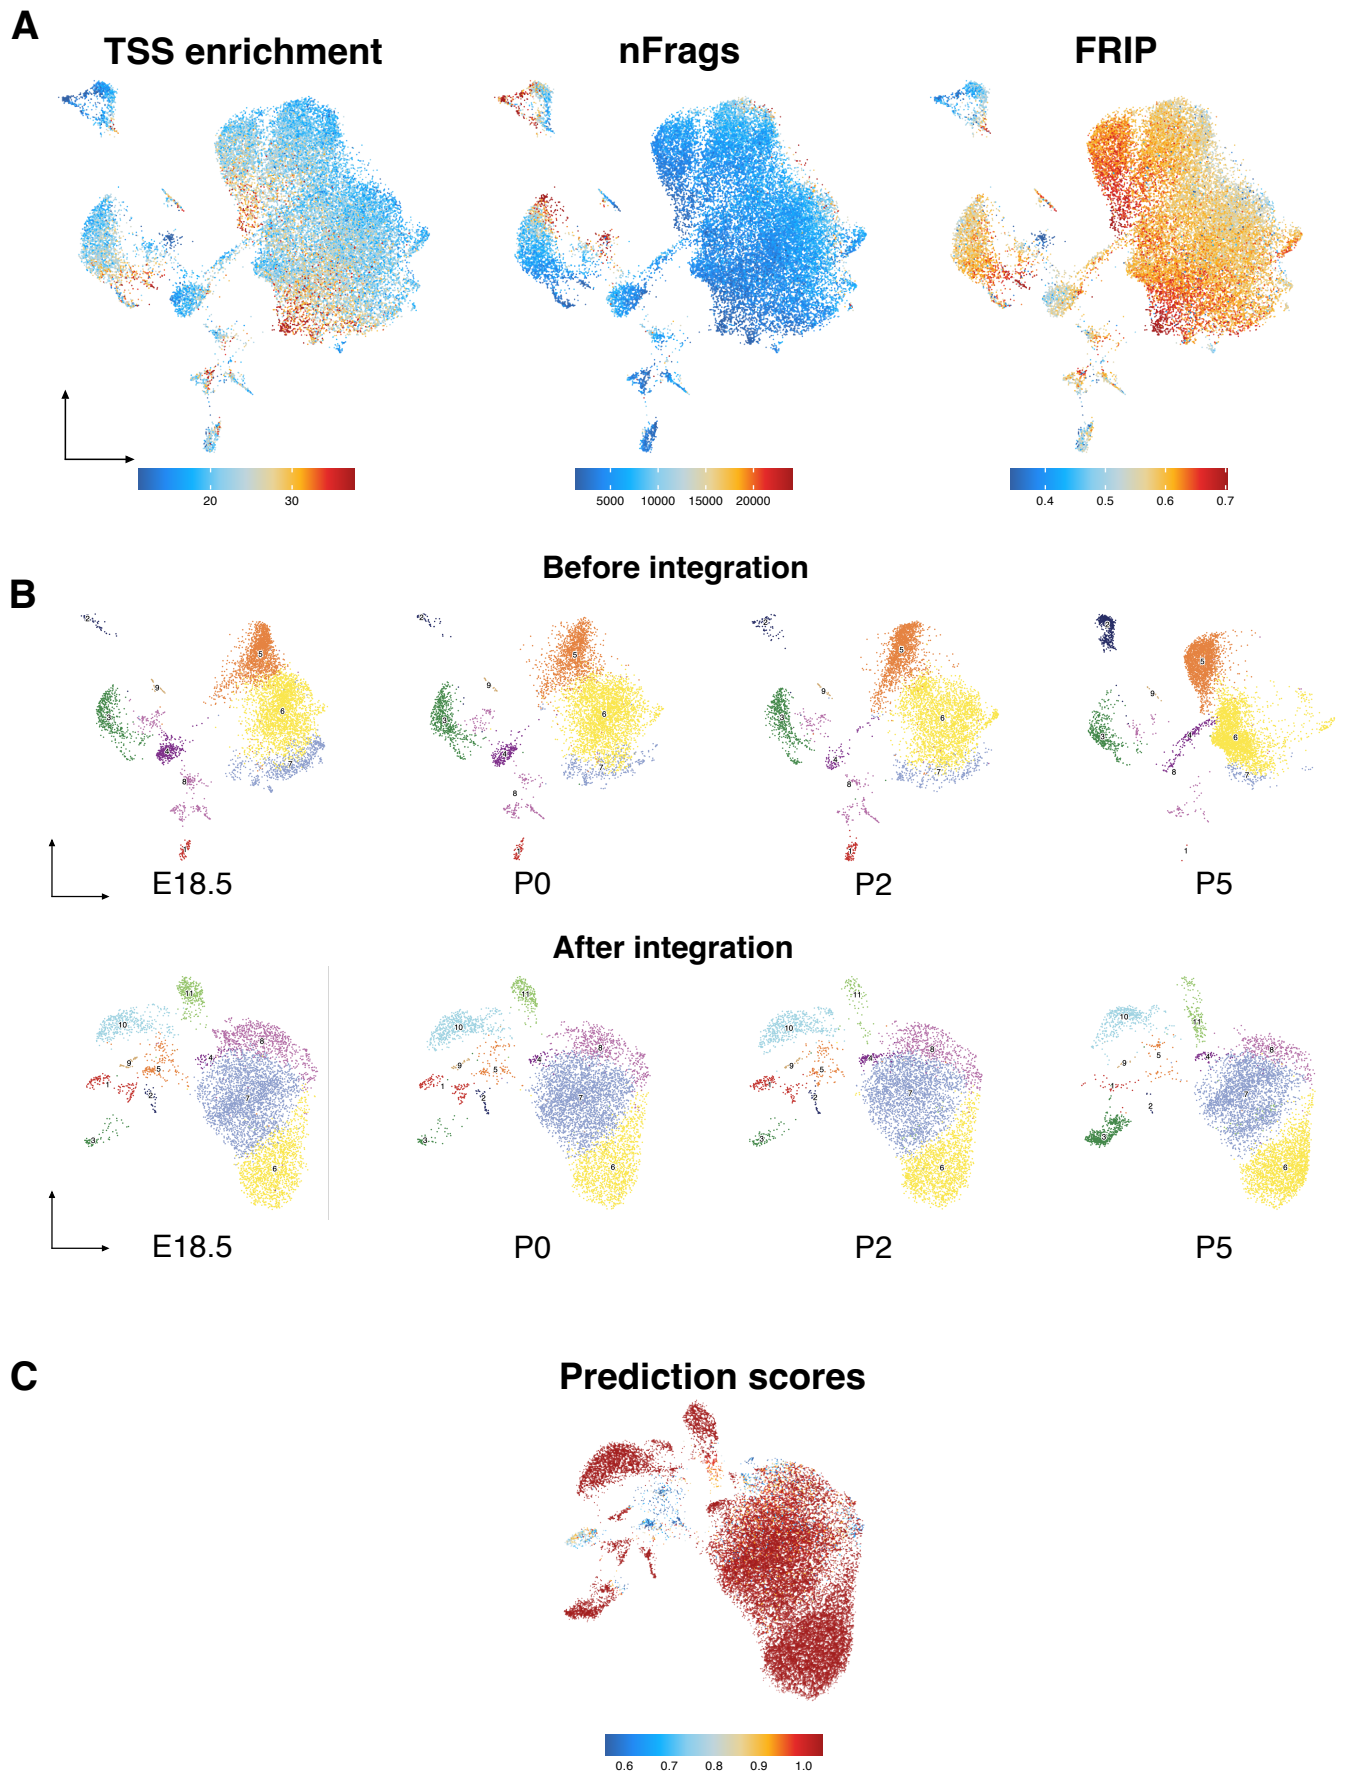

Supplement: supp [file elife-75624-supp-v1.zip]

Figure 1-figure supplement 1

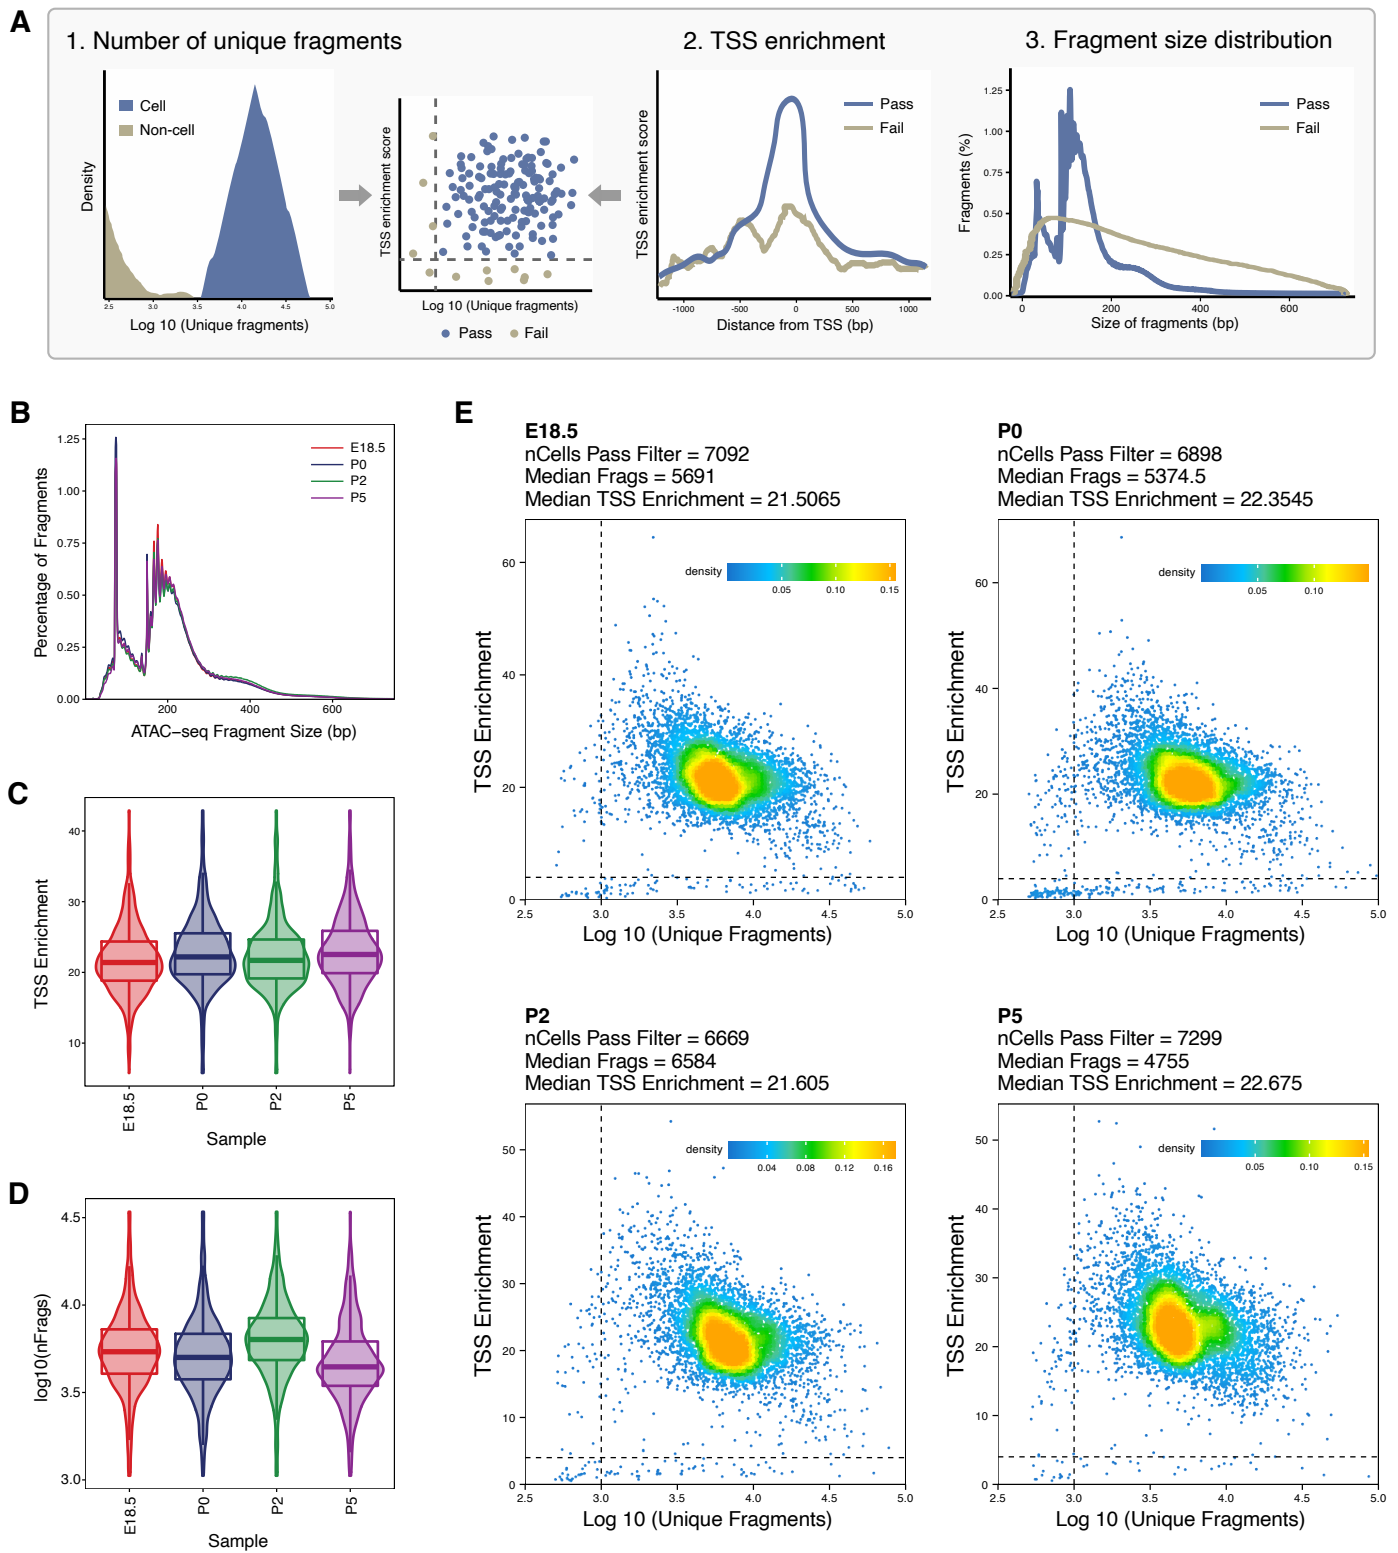

Supplement: supp [file elife-75624-supp-v1.zip › elife_poa_e75624_Figure_1_figure_supplement_1.pdf]

Figure 3-figure supplement 2

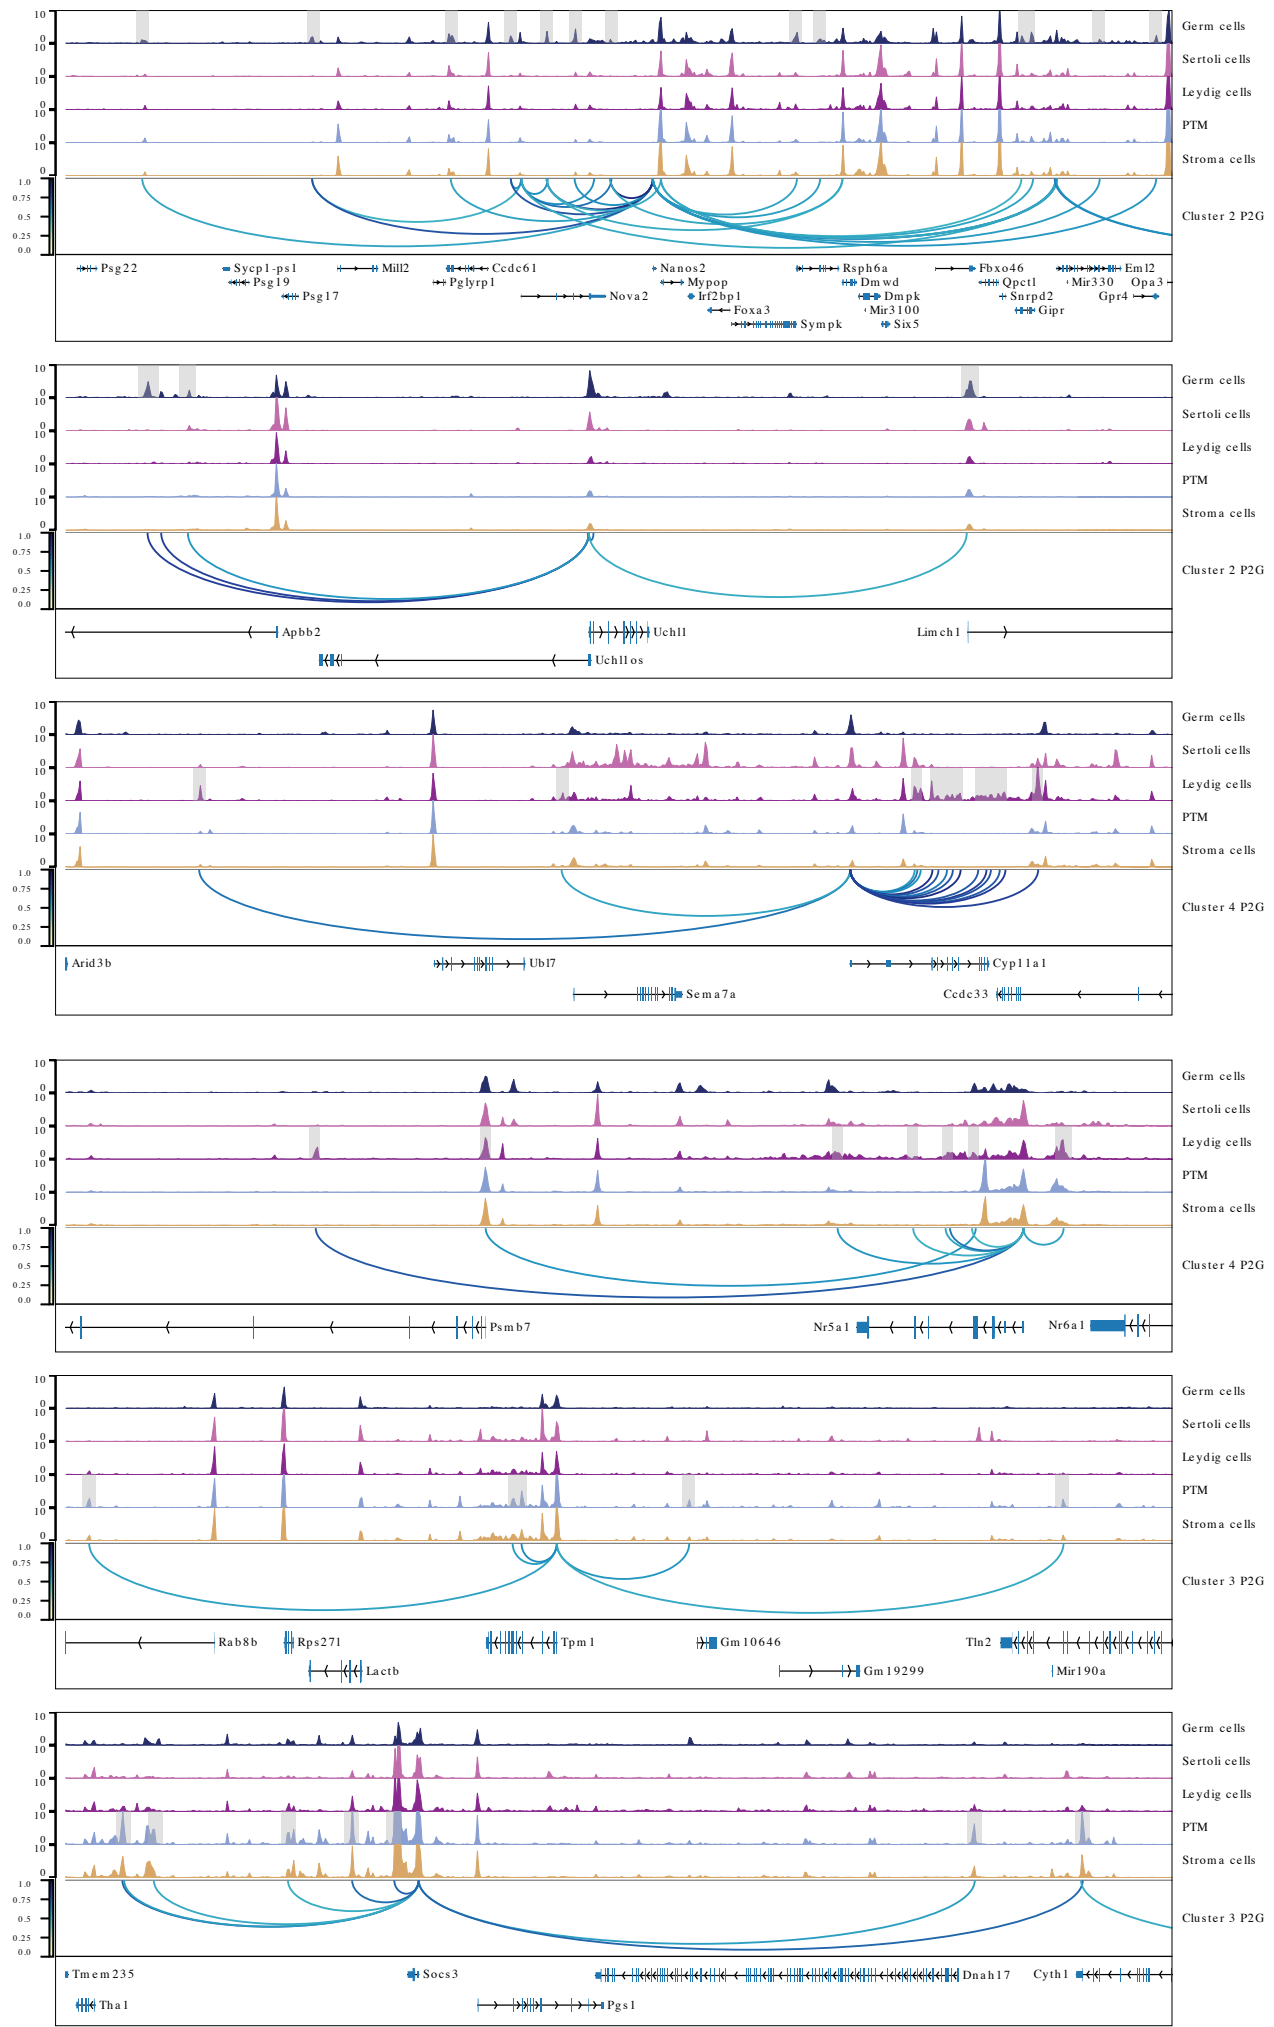

Supplement: supp [file elife-75624-supp-v1.zip › elife_poa_e75624_Figure_3_figure_supplement_2.pdf]

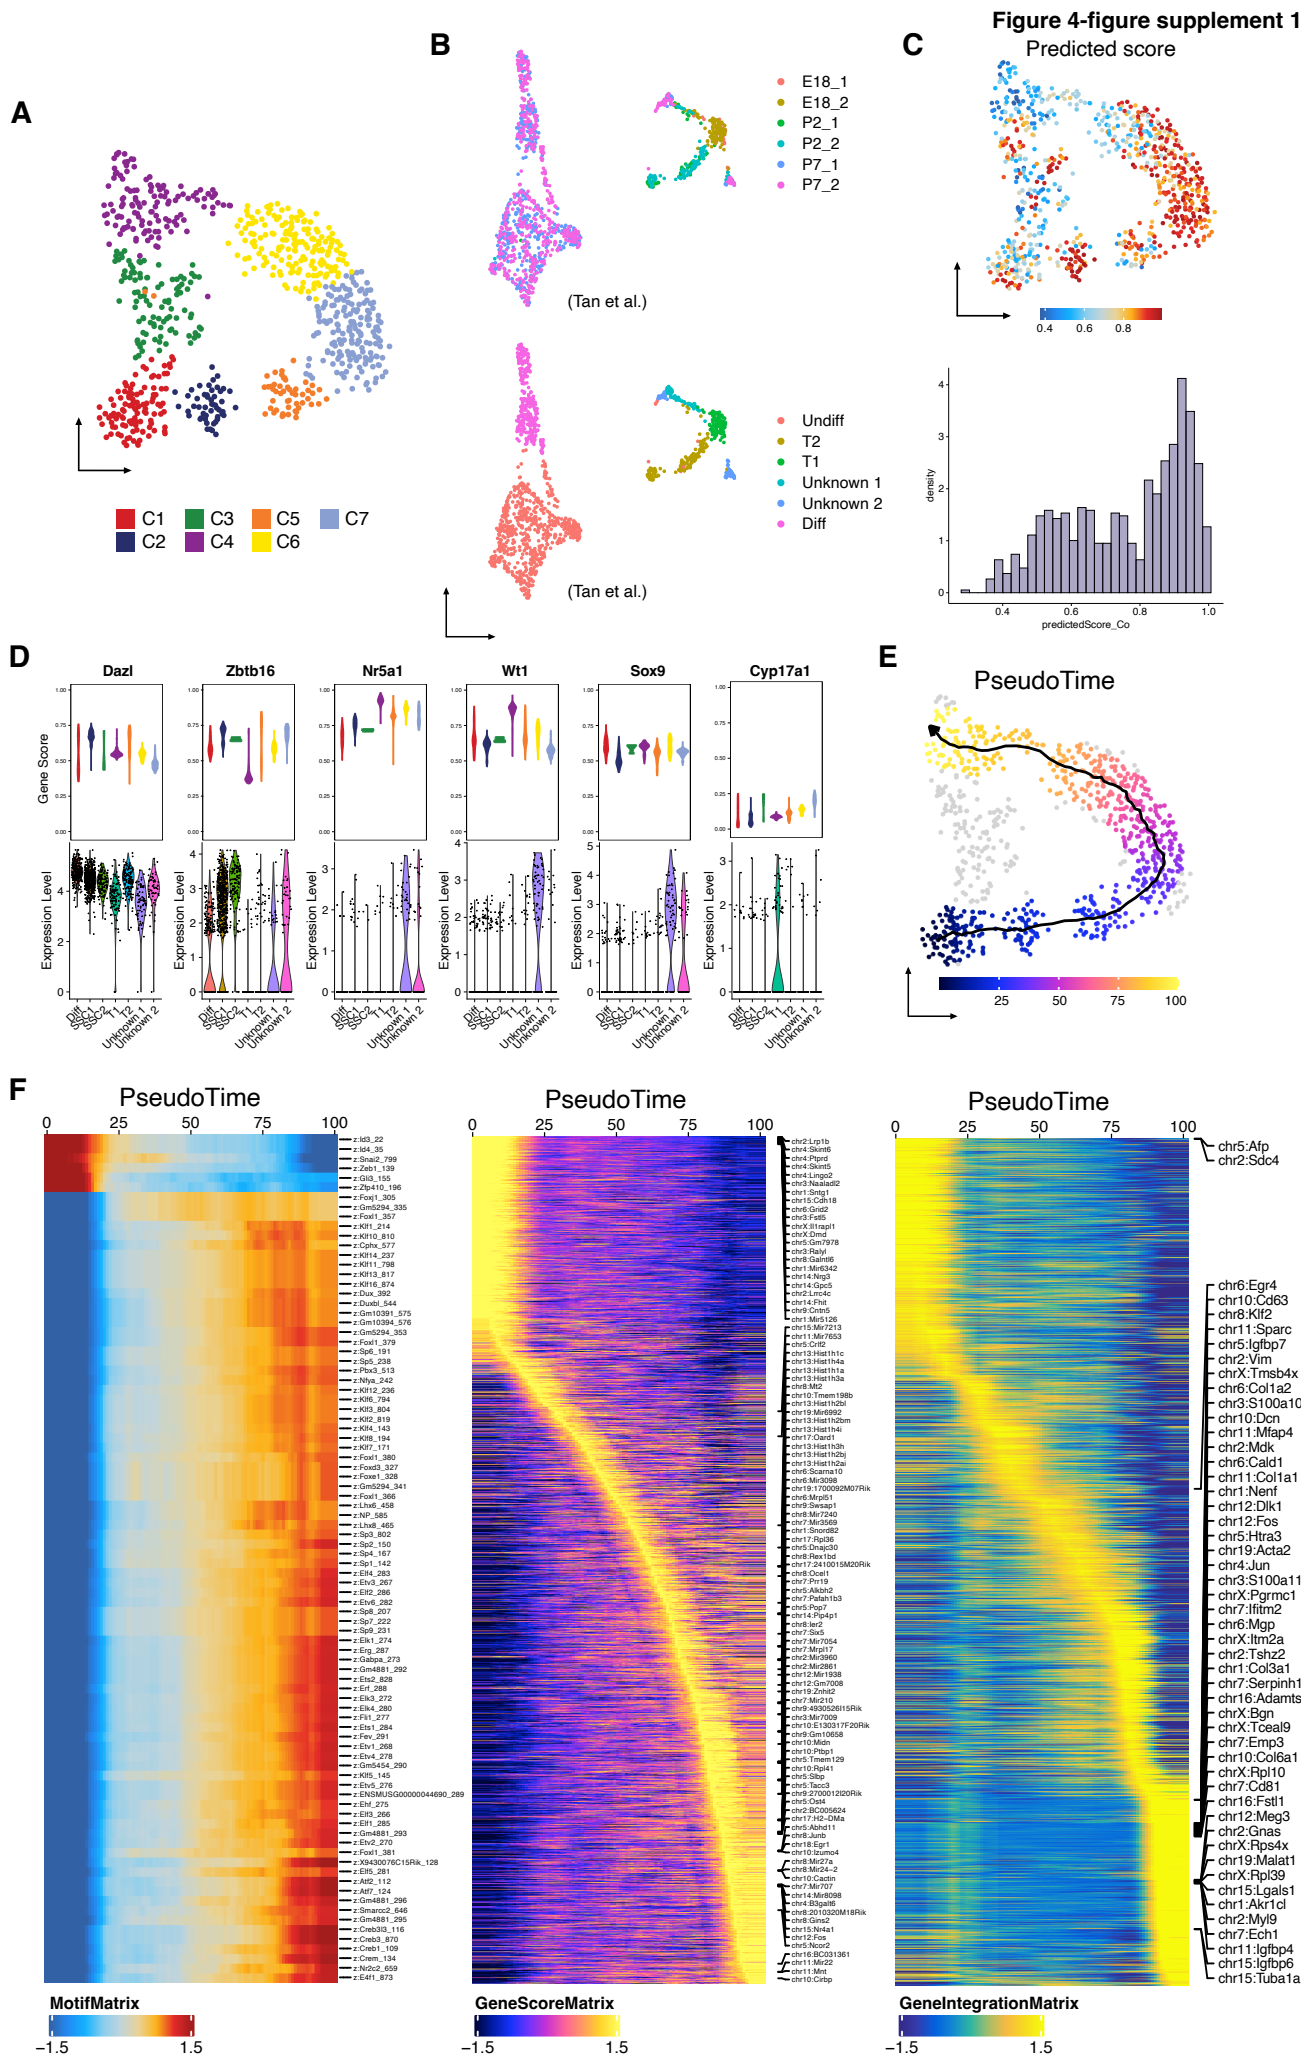

Supplement: supp [file elife-75624-supp-v1.zip › elife_poa_e75624_Figure_4_figure_supplement_1.pdf]

**Figure 4-figure supplement 2**

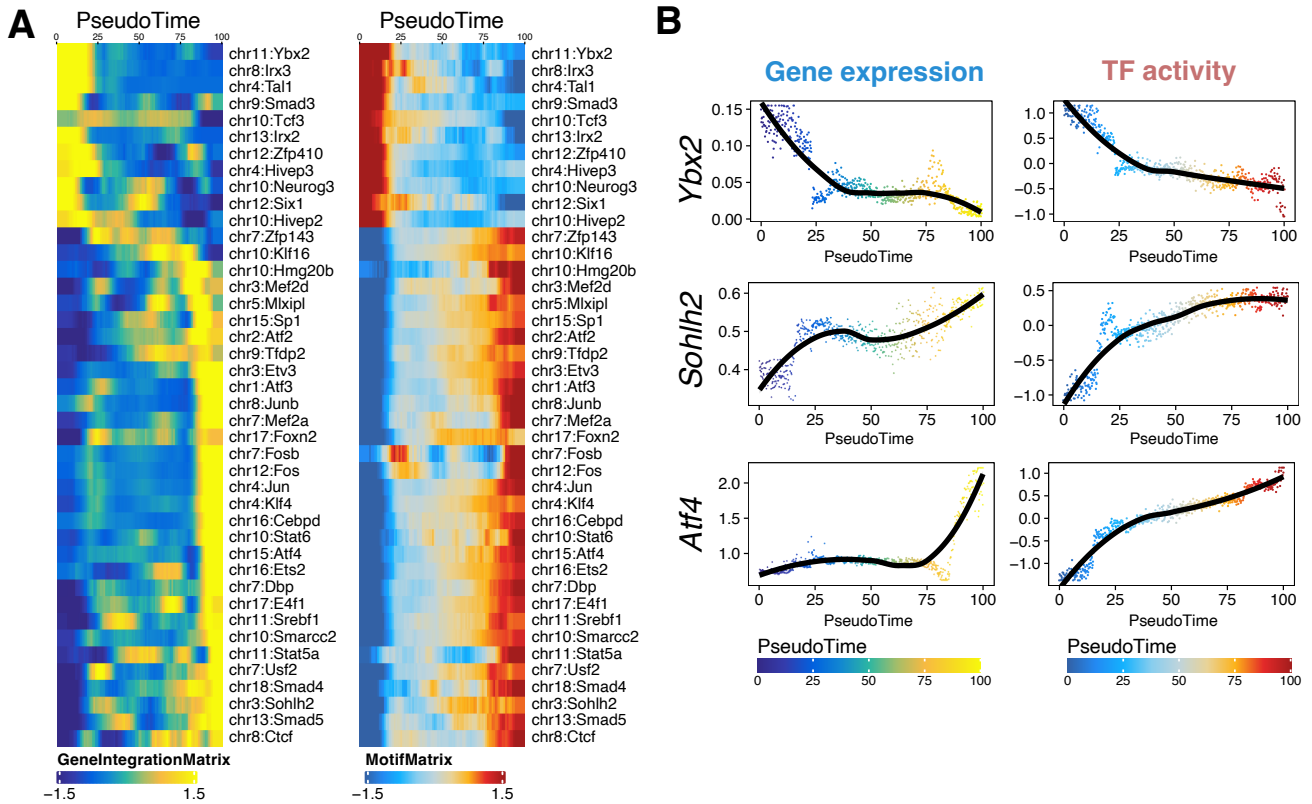

Supplement: supp [file elife-75624-supp-v1.zip › elife_poa_e75624_Figure_4_figure_supplement_2.pdf]

Figure 4-figure supplement 4

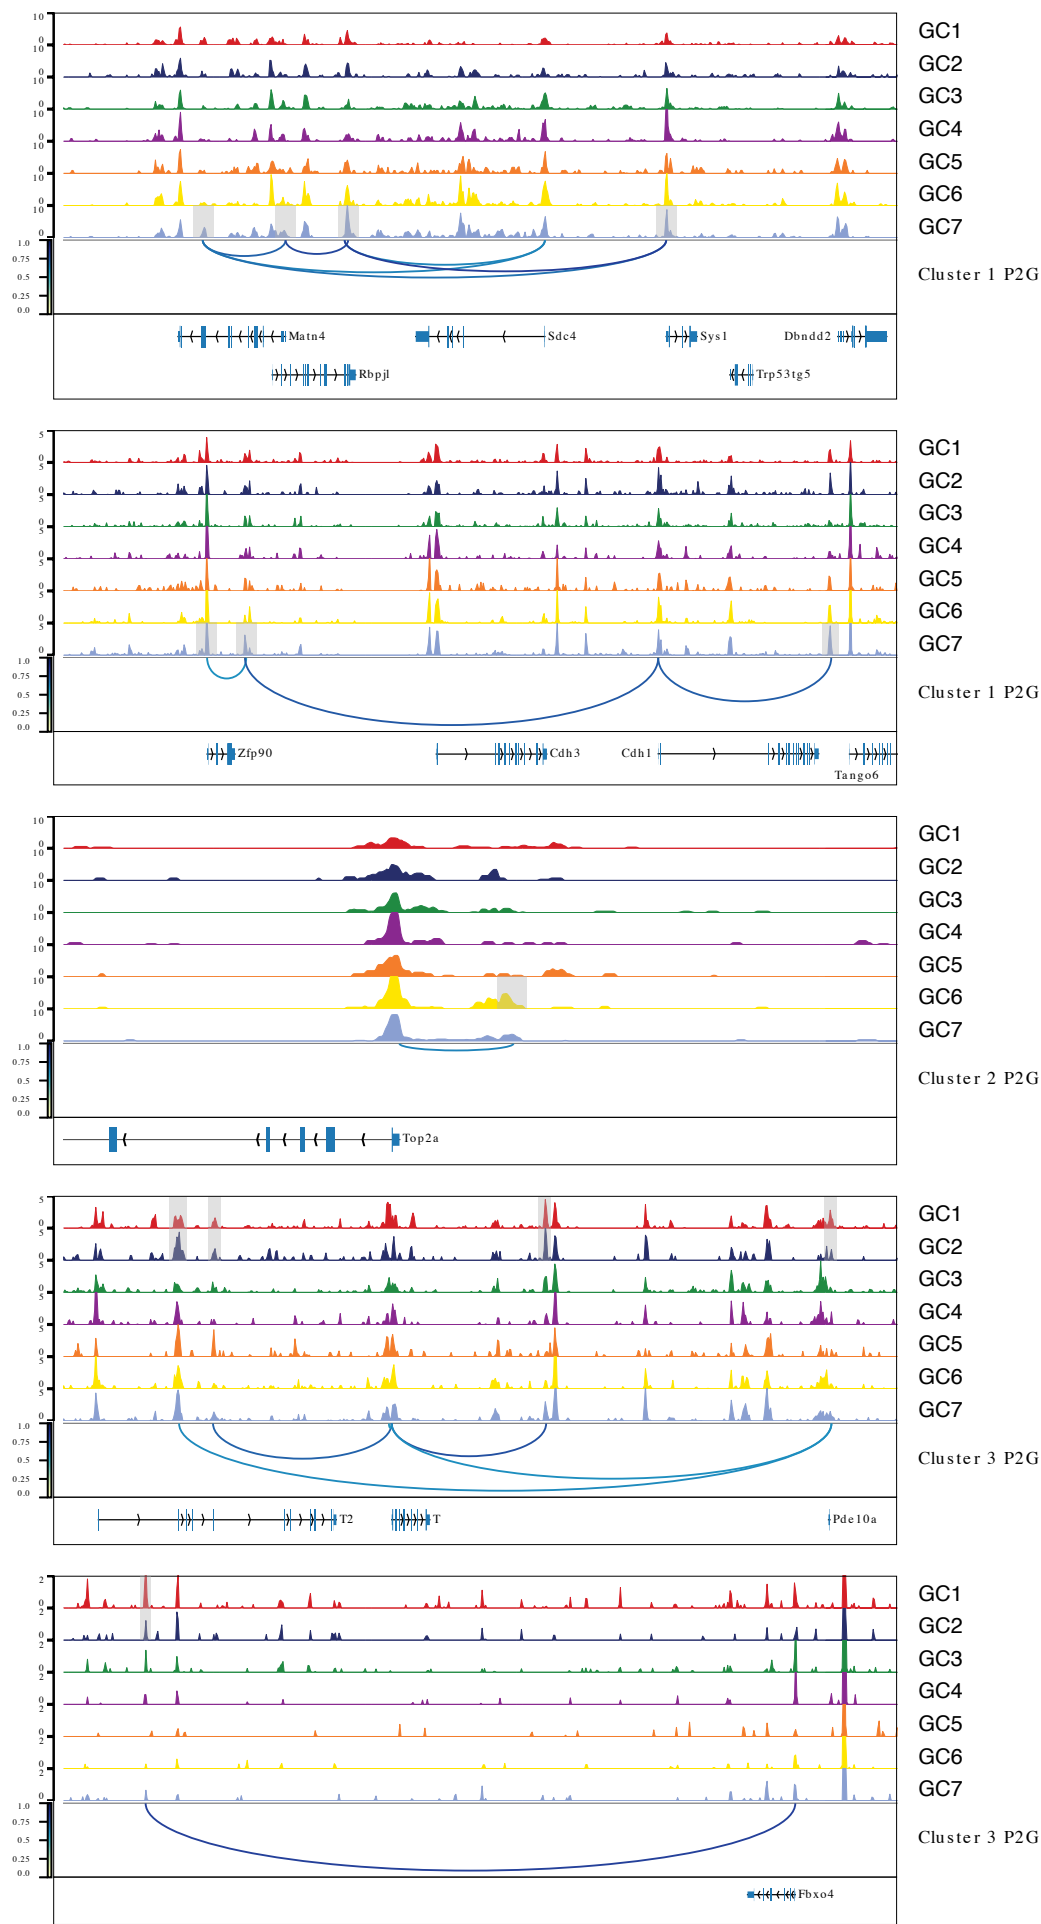

Supplement: supp [file elife-75624-supp-v1.zip › elife_poa_e75624_Figure_4_figure_supplement_4.pdf]

Figure 5-figure supplement 1

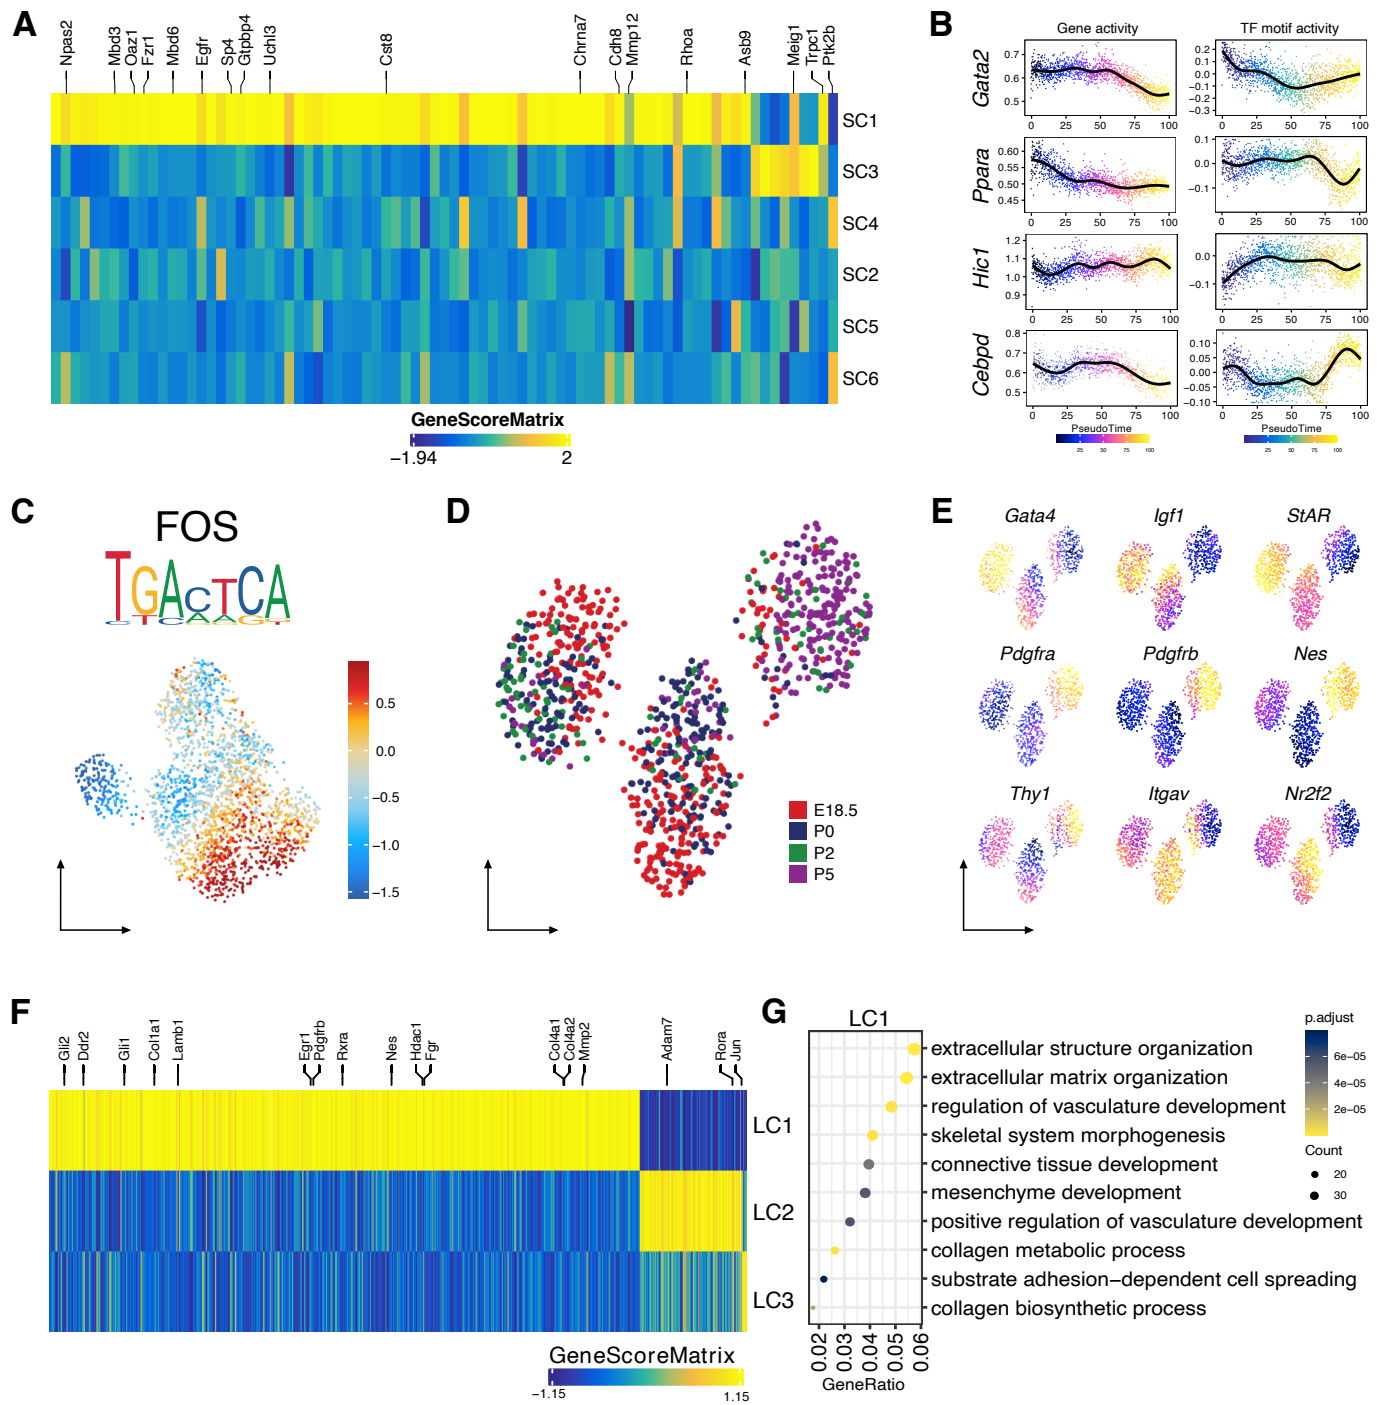

Supplement: supp [file elife-75624-supp-v1.zip › elife_poa_e75624_Figure_5_figure_supplement_1.pdf]

Figure 5-figure supplement 2

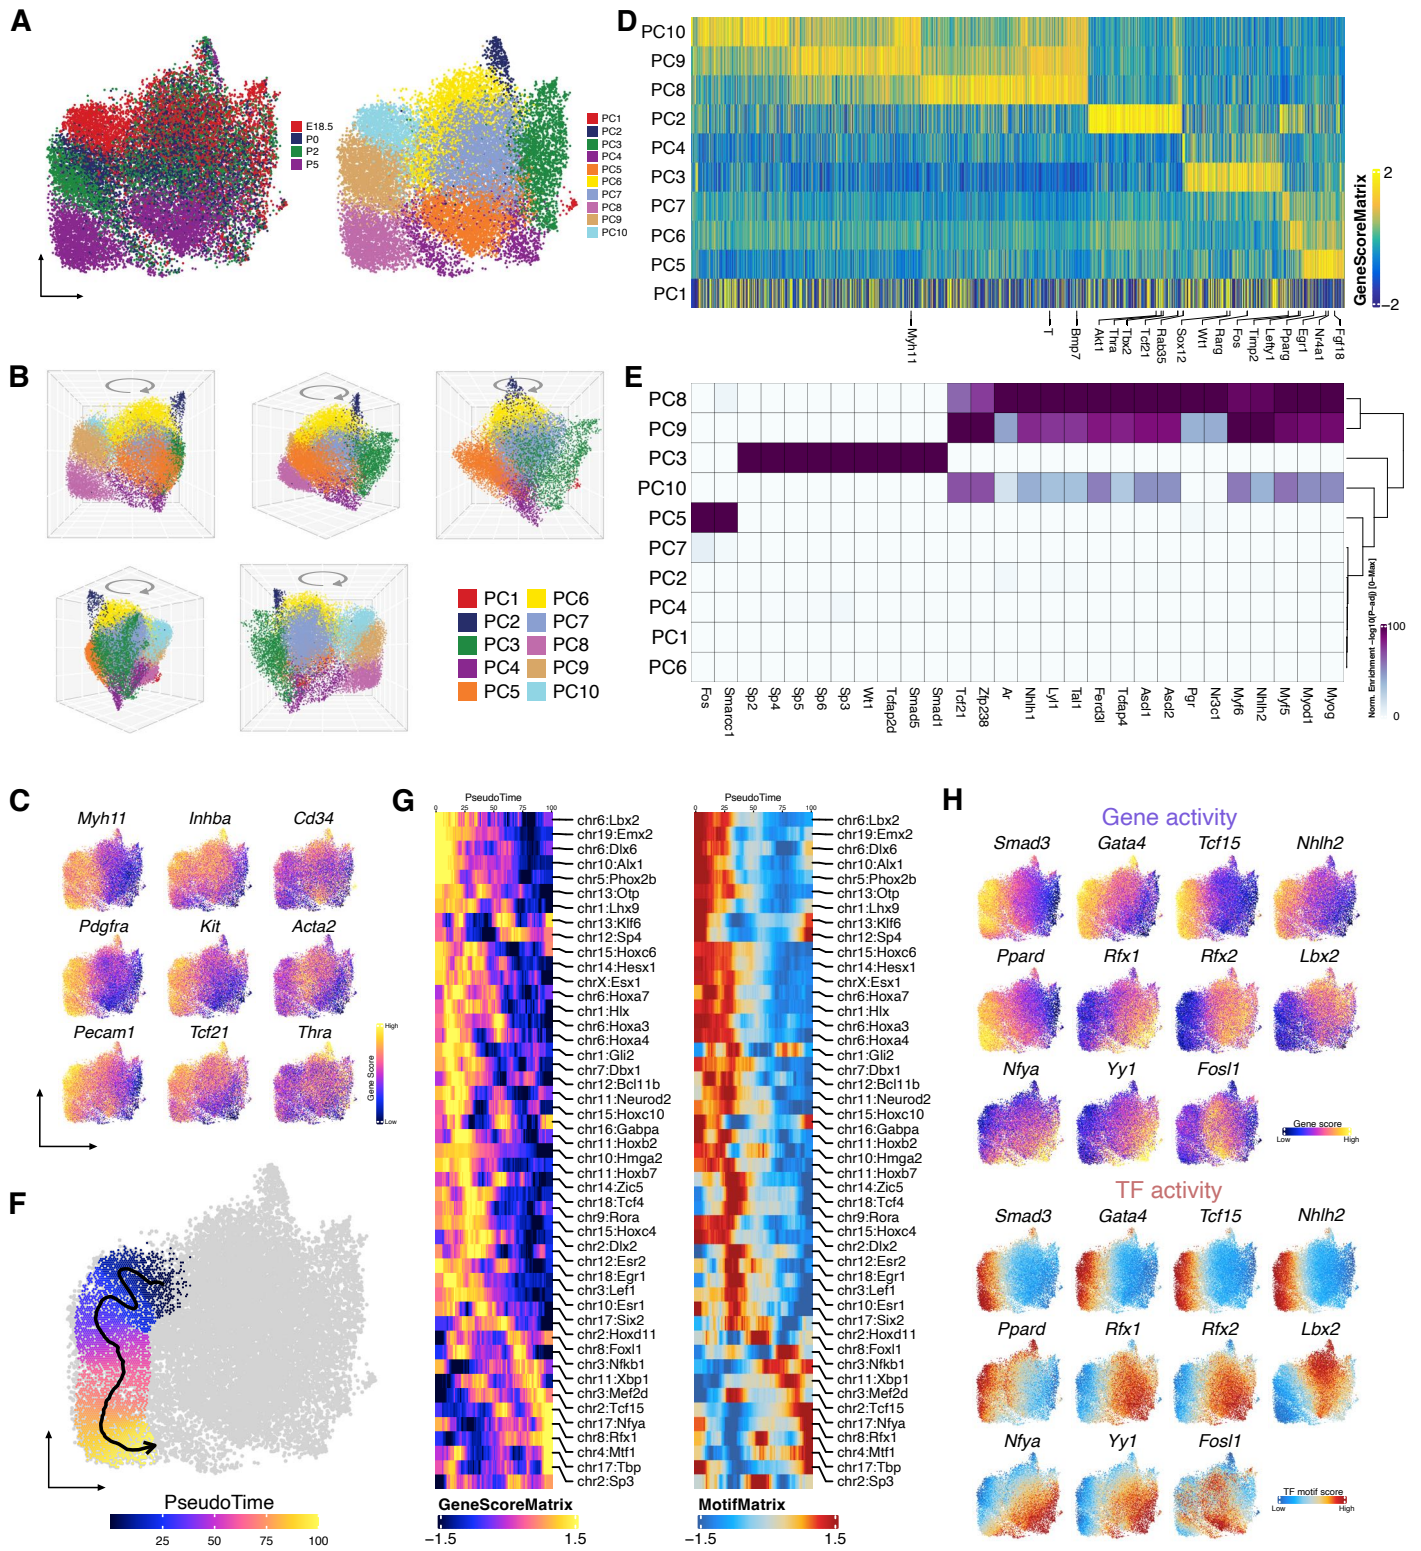

Supplement: supp [file elife-75624-supp-v1.zip › elife_poa_e75624_Figure_5_figure_supplement_2.pdf]
